# Supplementary material
Source: PubMed Central journal article supplement (PMC8639767)
Supplement: NIHMS1752098-supplement-319066_Major_Resources_Table.pdf [file NIHMS1752098-supplement-319066_Major_Resources_Table.pdf]

## Major Resources Table

### Animals (in vivo studies)

| Species                                       | Vendor or Source | Background Strain | Sex | Persistent ID / URL |
|-----------------------------------------------|------------------|-------------------|-----|---------------------|
| <i>C57BL/6J</i>                               | In house         | C57BL/6J          | M/F | N/A                 |
| <i>FAK WT/KD</i>                              | In house         | C57BL/6J          | M/F | N/A                 |
| <i>FAK flox/flox Myh11-CreER<sup>T2</sup></i> | In house         | C57BL/6J          | M/F | N/A                 |
| <i>FAK flox/WT Myh11-CreER<sup>T2</sup></i>   | In house         | C57BL/6J          | M   | N/A                 |
| <i>FAK flox/KD Myh11-CreER<sup>T2</sup></i>   | In house         | C57BL/6J          | M   | N/A                 |

### Antibodies

| Target antigen         | Host species | Vendor or Source          | Catalog #  | Working concentration         | Persistent ID / URL                                                                                                                                                                                                     |
|------------------------|--------------|---------------------------|------------|-------------------------------|-------------------------------------------------------------------------------------------------------------------------------------------------------------------------------------------------------------------------|
| FAK                    | Mouse        | Millipore                 | 05-537     | 1:2000 WB<br>1:100 IF         | <a href="https://www.emdmillipore.com/US/en/product/Anti-FAK-Antibody-clone-4.47,MM_NF-05-537">https://www.emdmillipore.com/US/en/product/Anti-FAK-Antibody-clone-4.47,MM_NF-05-537</a>                                 |
| TAGLN (SM22)           | Mouse        | Millipore                 | MABT167    | 1:1000 WB<br>1:500 IF         | <a href="https://www.emdmillipore.com/US/en/product/Anti-Transgelin-SM22a-Antibody-clone-20F2.2,MM_NF-MABT167">https://www.emdmillipore.com/US/en/product/Anti-Transgelin-SM22a-Antibody-clone-20F2.2,MM_NF-MABT167</a> |
| Calponin (CNN1)        | Mouse        | Millipore                 | C2687      | 1:1000 WB                     | <a href="https://www.sigmaaldrich.com/US/en/product/sigma/c2687?context=product">https://www.sigmaaldrich.com/US/en/product/sigma/c2687?context=product</a>                                                             |
| ACTA2 ( $\alpha$ -SMA) | Mouse        | Millipore                 | A5228      | 1:5000 WB<br>1:500 IF         | <a href="https://www.sigmaaldrich.com/US/en/product/SIGMA/A5228">https://www.sigmaaldrich.com/US/en/product/SIGMA/A5228</a>                                                                                             |
| ACTA2 ( $\alpha$ -SMA) | Rabbit       | Millipore                 | ABT1487    | 1:500 IF                      | <a href="https://www.sigmaaldrich.com/US/en/product/mm/abt1487?context=product">https://www.sigmaaldrich.com/US/en/product/mm/abt1487?context=product</a>                                                               |
| 5-mC                   | Mouse        | Millipore                 | SAB2702243 | 1:10000 dot blot<br>1:1000 IF | <a href="https://www.sigmaaldrich.com/US/en/product/sigma/sab2702243?context=product">https://www.sigmaaldrich.com/US/en/product/sigma/sab2702243?context=product</a>                                                   |
| Ubiquitin              | Mouse        | Millipore                 | 04-262     | 1:2000 WB                     | <a href="https://www.sigmaaldrich.com/US/en/product/mm/04262?context=product">https://www.sigmaaldrich.com/US/en/product/mm/04262?context=product</a>                                                                   |
| H4Ac                   | Rabbit       | Millipore                 | 06-866     | 1 $\mu$ g ChIP                | <a href="https://www.sigmaaldrich.com/US/en/product/mm/06866?context=product">https://www.sigmaaldrich.com/US/en/product/mm/06866?context=product</a>                                                                   |
| GAPDH                  | Mouse        | Millipore                 | MAB374     | 1:5000 WB                     | <a href="https://www.sigmaaldrich.com/US/en/product/mm/mab374?context=product">https://www.sigmaaldrich.com/US/en/product/mm/mab374?context=product</a>                                                                 |
| DNMT3A                 | Rabbit       | Cell Signaling Technology | 2160       | 1:200 IF                      | <a href="https://www.cellsignal.com/products/primary-antibodies/dnmt3a-antibody/2160">https://www.cellsignal.com/products/primary-antibodies/dnmt3a-antibody/2160</a>                                                   |
| $\beta$ -Actin         | Mouse        | Santa Cruz Biotechnology  | SC47778    | 1:5000 WB                     | <a href="https://www.scbt.com/p/beta-actin-antibody-c4">https://www.scbt.com/p/beta-actin-antibody-c4</a>                                                                                                               |
| DNMT3A                 | Mouse        | Santa Cruz Biotechnology  | SC365769   | 1:1000 WB                     | <a href="https://www.scbt.com/p/dnmt3a-antibody-c-12">https://www.scbt.com/p/dnmt3a-antibody-c-12</a>                                                                                                                   |
| DNMT3A                 | Mouse        | Santa Cruz Biotechnology  | SC373905   | 1:200 IF                      | <a href="https://www.scbt.com/p/dnmt3a-antibody-a-10">https://www.scbt.com/p/dnmt3a-antibody-a-10</a>                                                                                                                   |

|                       |        |                          |           |                       |                                                                                                                                                                                                                                                                       |
|-----------------------|--------|--------------------------|-----------|-----------------------|-----------------------------------------------------------------------------------------------------------------------------------------------------------------------------------------------------------------------------------------------------------------------|
| DNMT1                 | Rabbit | Santa Cruz Biotechnology | SC20701   | 1:1000 WB<br>1:200 IF | <a href="https://www.scbt.com/p/dnmt1-antibody-h-300">https://www.scbt.com/p/dnmt1-antibody-h-300</a>                                                                                                                                                                 |
| SRF                   | Rabbit | Santa Cruz Biotechnology | SC335     | 1 µg ChIP             | <a href="https://www.scbt.com/p/srf-antibody-g-20">https://www.scbt.com/p/srf-antibody-g-20</a>                                                                                                                                                                       |
| pY397 FAK             | Rabbit | Thermo Fisher            | 44-624G   | 1:3000 WB<br>1:300 IF | <a href="https://www.thermofisher.com/antibody/product/Phospho-FAK-Tyr397-Antibody-Polyclonal/44-624G">https://www.thermofisher.com/antibody/product/Phospho-FAK-Tyr397-Antibody-Polyclonal/44-624G</a>                                                               |
| DNMT3B                | Rabbit | Thermo Fisher            | PA1-32317 | 1:1000 WB<br>1:200 IF | <a href="https://scicrunch.org/resources/Antibodies/search?q=PA1-32317&amp;l=PA1-32317">https://scicrunch.org/resources/Antibodies/search?q=PA1-32317&amp;l=PA1-32317</a><br>(Discontinued)                                                                           |
| Alexa 488 anti-mouse  | Goat   | Thermo Fisher            | A11001    | 1:1000 IF             | <a href="https://www.thermofisher.com/antibody/product/Goat-anti-Mouse-IgG-H-L-Cross-Adsorbed-Secondary-Antibody-Polyclonal/A-11001">https://www.thermofisher.com/antibody/product/Goat-anti-Mouse-IgG-H-L-Cross-Adsorbed-Secondary-Antibody-Polyclonal/A-11001</a>   |
| Alexa 594 anti-mouse  | Goat   | Thermo Fisher            | A11005    | 1:1000 IF             | <a href="https://www.thermofisher.com/antibody/product/Goat-anti-Mouse-IgG-H-L-Cross-Adsorbed-Secondary-Antibody-Polyclonal/A-11005">https://www.thermofisher.com/antibody/product/Goat-anti-Mouse-IgG-H-L-Cross-Adsorbed-Secondary-Antibody-Polyclonal/A-11005</a>   |
| Alexa 488 anti-rabbit | Goat   | Thermo Fisher            | A11008    | 1:1000 IF             | <a href="https://www.thermofisher.com/antibody/product/Goat-anti-Rabbit-IgG-H-L-Cross-Adsorbed-Secondary-Antibody-Polyclonal/A-11008">https://www.thermofisher.com/antibody/product/Goat-anti-Rabbit-IgG-H-L-Cross-Adsorbed-Secondary-Antibody-Polyclonal/A-11008</a> |
| Alexa 594 anti-rabbit | Goat   | Thermo Fisher            | A11012    | 1:1000 IF             | <a href="https://www.thermofisher.com/antibody/product/Goat-anti-Rabbit-IgG-H-L-Cross-Adsorbed-Secondary-Antibody-Polyclonal/A-11012">https://www.thermofisher.com/antibody/product/Goat-anti-Rabbit-IgG-H-L-Cross-Adsorbed-Secondary-Antibody-Polyclonal/A-11012</a> |
| Anti-Mouse HRP        | Goat   | Thermo Fisher            | 31430     | 1:5000 WB             | <a href="https://www.thermofisher.com/antibody/product/Goat-anti-Mouse-IgG-H-L-Secondary-Antibody-Polyclonal/31430">https://www.thermofisher.com/antibody/product/Goat-anti-Mouse-IgG-H-L-Secondary-Antibody-Polyclonal/31430</a>                                     |
| Anti-Rabbit HRP       | Goat   | Thermo Fisher            | 31460     | 1:5000 WB             | <a href="https://www.thermofisher.com/antibody/product/Goat-anti-Rabbit-IgG-H-L-Secondary-Antibody-Polyclonal/31460">https://www.thermofisher.com/antibody/product/Goat-anti-Rabbit-IgG-H-L-Secondary-Antibody-Polyclonal/31460</a>                                   |
| Caldesmon (CALD1)     | Rabbit | abcam                    | ab32330   | 1µg ChIP              | <a href="https://www.abcam.com/nav/primary-antibodies/rabbit-mono-clonal-antibodies/caldesmoncdm-antibody-e89-ab32330.html">https://www.abcam.com/nav/primary-antibodies/rabbit-mono-clonal-antibodies/caldesmoncdm-antibody-e89-ab32330.html</a>                     |
| H3K27Ac               | Rabbit | abcam                    | ab4729    | 1µg ChIP              | <a href="https://www.abcam.com/histone-h3-acetyl-k27-antibody-chip-grade-ab4729.html">https://www.abcam.com/histone-h3-acetyl-k27-antibody-chip-grade-ab4729.html</a>                                                                                                 |
| H3K9me3               | Rabbit | abcam                    | ab8898    | 1µg ChIP              | <a href="https://www.abcam.com/histone-h3-tri-methyl-k9-antibody-chip-grade-ab8898.html">https://www.abcam.com/histone-h3-tri-methyl-k9-antibody-chip-grade-ab8898.html</a>                                                                                           |
| H3                    | Rabbit | abcam                    | ab1791    | 1µg ChIP              | <a href="https://www.abcam.com/histone-h3-antibody-nuclear-">https://www.abcam.com/histone-h3-antibody-nuclear-</a>                                                                                                                                                   |

|       |        |                                            |         |                |                                                                                                                                                                                 |
|-------|--------|--------------------------------------------|---------|----------------|---------------------------------------------------------------------------------------------------------------------------------------------------------------------------------|
|       |        |                                            |         |                | marker-and-chip-grade-ab1791.html                                                                                                                                               |
| H4    | Rabbit | abcam                                      | ab10158 | 1 $\mu$ g ChIP | <a href="https://www.abcam.com/histone-h4-antibody-chip-grade-ab10158.html">https://www.abcam.com/histone-h4-antibody-chip-grade-ab10158.html</a>                               |
| MYH11 | Rabbit | Alfa Aesar                                 | BT562   | 1:1000 WB      | <a href="https://www.fishersci.com/shop/products/anti-myosin-sm-562-100microl/aaj64817amj">https://www.fishersci.com/shop/products/anti-myosin-sm-562-100microl/aaj64817amj</a> |
| FAK   | Rabbit | In house against a.a. 896-912 of human FAK |         | 1 $\mu$ g IP   | N/A                                                                                                                                                                             |

### Plasmids

| Clone Name                        | Use                                                  | Source / Repository | Persistent ID / URL                                                         |
|-----------------------------------|------------------------------------------------------|---------------------|-----------------------------------------------------------------------------|
| pMD2.G                            | VSV-G envelope plasmid                               | Addgene             | <a href="https://www.addgene.org/12259/">https://www.addgene.org/12259/</a> |
| pCMVR8.74                         | Gag/pol/REV plasmid                                  | Addgene             | <a href="https://www.addgene.org/22036/">https://www.addgene.org/22036/</a> |
| pCDH-FLAG-FAK-WT-puro             | FLAG-FAK-WT Expression with Puro Resistance          | In house            | N/A                                                                         |
| pCDH-FLAG-FAK-NLM-puro            | FLAG-FAK-NLM Expression with Puro Resistance         | In house            | N/A                                                                         |
| pLentiLox 3.7-puro                | shRNA Backbone Vector with Puro Resistance           | In house            | N/A                                                                         |
| pLentiLox 3.7-puro shScr          | Scramble Control with Puro Resistance                | In house            | N/A                                                                         |
| pLentiLox 3.7-puro shDNMT3A-1     | DNMT3A Target Sequence #1                            | In house            | N/A                                                                         |
| pLentiLox 3.7-puro shDNMT3A-2     | DNMT3A Target Sequence #2                            | In house            | N/A                                                                         |
| pLentiLox 3.7-puro shDNMT3B-1     | DNMT3A Target Sequence #1                            | In house            | N/A                                                                         |
| pLentiLox 3.7-puro shDNMT3B-2     | DNMT3B Target Sequence #2                            | In house            | N/A                                                                         |
| pSicoR mCh-empty                  | shRNA Backbone Vector with mCherry Expression        | Addgene             | <a href="https://www.addgene.org/21907/">https://www.addgene.org/21907/</a> |
| pSicoR mCherry shScr              | Scramble Control with mCherry Expression             | In house            | N/A                                                                         |
| pSicoR mCherry shDNMT3A-1         | DNMT3A Target Sequence #1                            | In house            | N/A                                                                         |
| pcDNA-Myc-DNMT3A                  | Myc-DNMT3A Expression and Cloning for DNMT3A Mutants | Addgene             | <a href="https://www.addgene.org/35521/">https://www.addgene.org/35521/</a> |
| pcDNA-Myc-DNMT3A- $\Delta$ N-Term | Myc-DNMT3A a.a. 71-012                               | In house            | N/A                                                                         |
| pcDNA-Myc-                        | Myc-DNMT3A a.a.                                      | In house            | N/A                                                                         |

DOI [to be added]

|                   |                                        |          |                                                                               |
|-------------------|----------------------------------------|----------|-------------------------------------------------------------------------------|
| DNMT3A-N-Term     | 1-70                                   |          |                                                                               |
| pcDNA3.1-HA       | Backbone for HA-Tagged Fusion Proteins | Addgene  | <a href="https://www.addgene.org/128034/">https://www.addgene.org/128034/</a> |
| pcDNA3.1-UHRF1-HA | UHRF1-HA Expression                    | In house | N/A                                                                           |
| pcDNA3.1-UHRF2-HA | UHRF2-HA Expression                    | In house | N/A                                                                           |
| Myc-TRAF6         | Myc-TRAF6 Expression                   | In house | N/A                                                                           |

### Oligonucleotides

| Gene              | Sequence                                                                                                                                                      | Use                  |
|-------------------|---------------------------------------------------------------------------------------------------------------------------------------------------------------|----------------------|
| Acta2             | Fwd: 5' – AGACAGCTATGTGGGGGATG – 3'<br>Rev: 5' – GTTCAGTGGTGCCTCTGTCA – 3'                                                                                    | qPCR                 |
| Cnn1              | Fwd: 5' – AGCAGGAGCTGAGAGAGTGG – 3'<br>Rev: 5' – TGGTGCCAGTTCTGAGTTGA – 3'                                                                                    | qPCR                 |
| Tagln             | Fwd: 5' – CCCAGACACCGAAGCTACTC – 3'<br>Rev: 5' – CCACTCCACTAGTCGCTCCT – 3'                                                                                    | qPCR                 |
| Myh11             | Fwd: 5' – CGACAGGCTAGGGATGAGAG – 3'<br>Rev: 5' – ACATGGCTTCCAGTGTCTCC – 3'                                                                                    | qPCR                 |
| DNMT3A            | Fwd: 5' – ACGGCAATTCCTTCTCTGAA – 3'<br>Rev: 5' – ACGGTTCTCCTCCTGTTCTCCT – 3'                                                                                  | qPCR                 |
| DNMT3B            | Fwd: 5' – GCAGAGATGGAGACAGCACA – 3'<br>Rev: 5' – AAAGTTGCCATCACCAAACC – 3'                                                                                    | qPCR                 |
| DNMT1             | Fwd: 5' – GGAGAGCAGAAATGGCAGAC – 3'<br>Rev: 5' – CCCTCTTCCGACTCTTCCTT – 3'                                                                                    | qPCR                 |
| GAPDH             | Fwd: 5' – GGTGCTGAGTATGTCGTGGAGTCTA – 3'<br>Rev: 5' – AAAGTTGTCATGGATGACCTTGG – 3'                                                                            | qPCR                 |
| Myh11 Promoter    | Fwd: 5' – TGGGAATTCCTGTTTTCGAGAAT – 3'<br>Rev: 5' – CACACCACTCAGGCCATAAA – 3'                                                                                 | ChIP                 |
| Tagln Promoter    | Fwd: 5' – CTCATTGAAGAGCAGACC – 3'<br>Rev: 5' – ATGCTTTGGAGATGCTGC – 3'                                                                                        | ChIP                 |
| Acta2 Promoter    | Fwd: 5' – TCTGGCCACCCAGATTAGA – 3'<br>Rev: 5' – GCTGAACGCTGAAGGGTTAT – 3'                                                                                     | ChIP                 |
| Tagln Promoter BS | Fwd: 5' – TATTAATTYGATTTTAACTTTTTGTAAGAAGGTG – 3'<br>Rev: 5' – CTCCTACCCATAAAAATCTACTTAACTC – 3'                                                              | Bisulfite Sequencing |
| Myh11 Promoter BS | Fwd: 5' – TTTTGTGTATTGTTGTTTAGTGAG – 3'<br>Rev: 5' – CCATTACACTCTAACTTTAATTTTC – 3'                                                                           | Bisulfite Sequencing |
| Mouse DNMT3A-1    | Sense: 5' - TGTTTCATACTTGGGAGGCTTTCAAGAGAAGCCTCCC AAGTATGAAACTTTTTTC – 3'<br>Antisense 5' - TCGAGAAAAAAGTTTCATACTTGGGAGGCTTCTCT TGAAAGCCTCCCAAGTATGAAACA – 3' | shRNA Knockdown      |
| Mouse DNMT3A-2    | Sense: 5' - TGTGTAGATATGTGGCATATTTCAAGAGAATATGCCA CATATCTACACTTTTTTC – 3'<br>Antisense 5' - TCGAGAAAAAAGTGTAGATATGTGGCATATTCTCT TGAAATATGCCACATATCTACACA – 3' | shRNA Knockdown      |
| Mouse DNMT3B-1    | Sense: 5' - TACCCAAGCGCCTCAAGACATTCAAGAGATGTCTTG AGGCGCTTGGGTTTTTTTC – 3'<br>Antisense 5' - TCGAGAAAAAACCCTCAAGACATCTC TTGAATGTCTTGAGGCGCTTGGGTA – 3'         | shRNA Knockdown      |
| Mouse DNMT3B-2    | Sense: 5' - TGCTCTGATATTCTAATGCCTTCAAGAGAGGCATTAG AATATCAGAGCTTTTTTC – 3'<br>Antisense 5' - TCGAGAAAAAAGCTCTGATATTCTAATGCCTCTCT TGAAGGCATTAGAATATCAGAGCA – 3' | shRNA Knockdown      |

|                |                                                                                                      |         |
|----------------|------------------------------------------------------------------------------------------------------|---------|
| DNMT3A N-Term  | Fwd CMV: 5' - CGCAAATGGGCGGTAGG – 3'<br>Rev: 5' – AAAGGATCCTTACGCAGGGTCCTTTGGCGTGTC – 3'             | Cloning |
| DNMT3A ΔN-Term | Fwd: 5' – AAAGAATTCGTGATCTCCAAGTCCCCATCC – 3'<br>Rev SP6: 5' – ATTTAGGTGACACTATA – 3'                | Cloning |
| UHRF1          | Fwd: 5' – AAAGGTACCGATGTGGATCCAGGTTCCGGACCATG – 3'<br>Rev: 5' – AAAGATATCTCACCGGCCATTGCCGTAGCCG – 3' | Cloning |
| UHRF2          | Fwd: 5' – AAAGGTACCGATGTGGATACAGGTTCCGCACCATT – 3'<br>Rev: 5' – AAAGATATCTCATCGTCCTTTGCTGTAGCCA – 3' | Cloning |

### Cultured Cells

| Name       | Vendor or Source  | Sex (F, M, or unknown) | Persistent ID / URL                                                                                                                                                                                                                                                                                               |
|------------|-------------------|------------------------|-------------------------------------------------------------------------------------------------------------------------------------------------------------------------------------------------------------------------------------------------------------------------------------------------------------------|
| mSMC       | In house          | Male                   |                                                                                                                                                                                                                                                                                                                   |
| hCASMC     | Lonza             | Female                 | <a href="https://bioscience.lonza.com/lonza_bs/US/en/Primary-and-Stem-Cells/p/000000000000185163/CASMC-%E2%80%93-Human-Coronary-Artery-Smooth-Muscle-Cells">https://bioscience.lonza.com/lonza_bs/US/en/Primary-and-Stem-Cells/p/000000000000185163/CASMC-%E2%80%93-Human-Coronary-Artery-Smooth-Muscle-Cells</a> |
| HEK 293T   | ATCC              | Female                 | <a href="https://www.atcc.org/products/crl-11268">https://www.atcc.org/products/crl-11268</a>                                                                                                                                                                                                                     |
| HEK 293 FT | Life Technologies | Female                 | <a href="https://www.thermofisher.com/order/catalog/product/R70007?us&amp;en#/R70007?us&amp;en">https://www.thermofisher.com/order/catalog/product/R70007?us&amp;en#/R70007?us&amp;en</a>                                                                                                                         |

### Data & Code Availability

| Description                               | Source / Repository     | Persistent ID / URL                                                                                                                     |
|-------------------------------------------|-------------------------|-----------------------------------------------------------------------------------------------------------------------------------------|
| RNA Sequencing for Femoral Artery Samples | Gene Expression Omnibus | <a href="https://www.ncbi.nlm.nih.gov/geo/query/acc.cgi?acc=GSE183143">https://www.ncbi.nlm.nih.gov/geo/query/acc.cgi?acc=GSE183143</a> |

### Other

| Description                           | Source / Repository | Catalog number |
|---------------------------------------|---------------------|----------------|
| Fibronectin                           | Sigma Aldrich       | 1141           |
| Poly-L-Lysine                         | Sigma Aldrich       | P4707          |
| Matrigel (Laminin)                    | Corning             | 356230         |
| Collagen Type I                       | Corning             | 354236         |
| Gelatin (Porcine)                     | Sigma Aldrich       | G1890          |
| Boyden Chamber                        | Millipore           | PI8P01250      |
| Protease inhibitor cocktail           | Roche               | 06538282001    |
| DMEM                                  | Sigma Aldrich       | D6429          |
| FBS                                   | Omega Scientific    | FB-02          |
| SmBM                                  | Lonza               | CC-3181        |
| SmGM-2 SingleQuots                    | Lonza               | CC-4149        |
| PEI                                   | Polysciences        | 24765          |
| 4-12 % Bis-Tris Polyacrylamide Gel    | Thermo Fisher       | NP0336BOX      |
| Protein A Agarose                     | Thermo Fisher       | 20334          |
| Protein G Sepharose                   | BioVision InCorp    | 6511-25        |
| Dynabeads Protein A                   | Thermo Fisher       | 10001D         |
| Dynabeads Protein G                   | Thermo Fisher       | 10003D         |
| Steriflip Filter (0.45 μm)            | Millipore           | SE1M003M00     |
| Amicon Ultra-15 Centrifuge Filter     | Millipore           | UFC910096      |
| NucleoSpin RNA isolation kit          | Macherey-Nagel      | 740955         |
| SuperScript III Reverse Transcriptase | Life Technologies   | 18080093       |

|                |                   |          |
|----------------|-------------------|----------|
| SYBR Green SMX | Bio-Rad           | 172-5124 |
| Tamoxifen      | Sigma Aldrich     | T5648    |
| OCT            | Fisher Scientific | 23730571 |
| DAPI           | Sigma Aldrich     | D8417    |
| Fluoromount-G  | SouthernBiotech   | 0100-01  |
| Image J        | NIH               | software |
| Photoshop CS5  | Adobe             | software |
| GraphPad Prism | GraphPad Software | software |
