# Supplementary material
Source: PubMed Central journal article supplement (PMC8639767)
Supplement: NIHMS1752098-supplement-319066_Uncut_Gel_Blots.pdf [file NIHMS1752098-supplement-319066_Uncut_Gel_Blots.pdf]

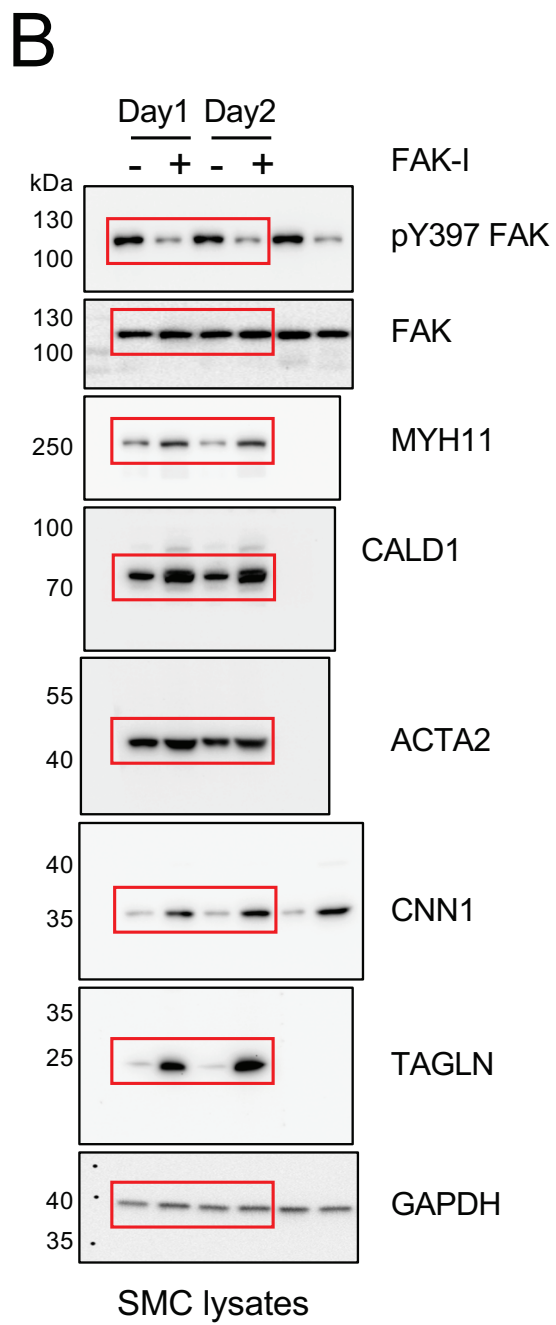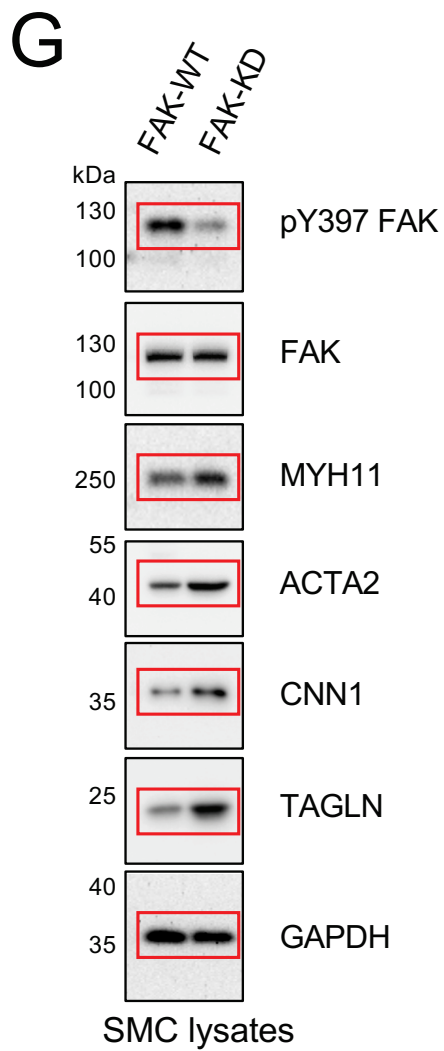

Figure 1

**D**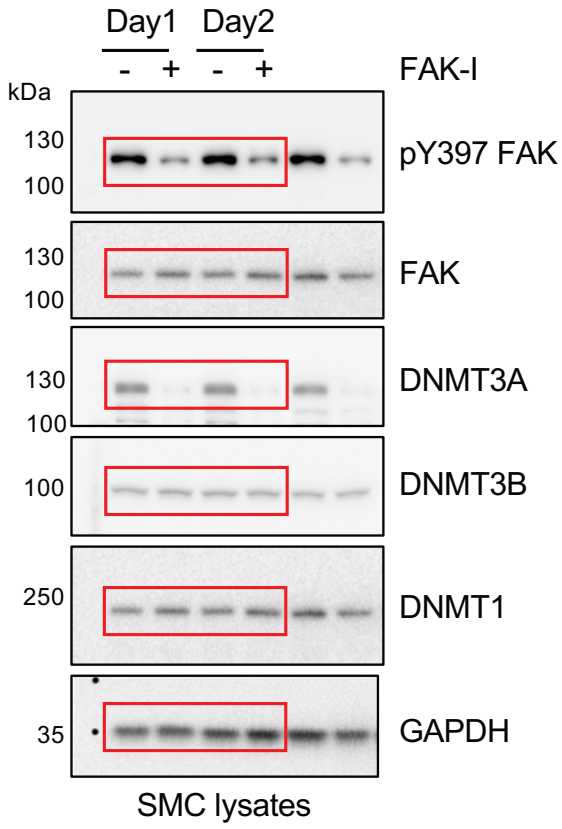**E**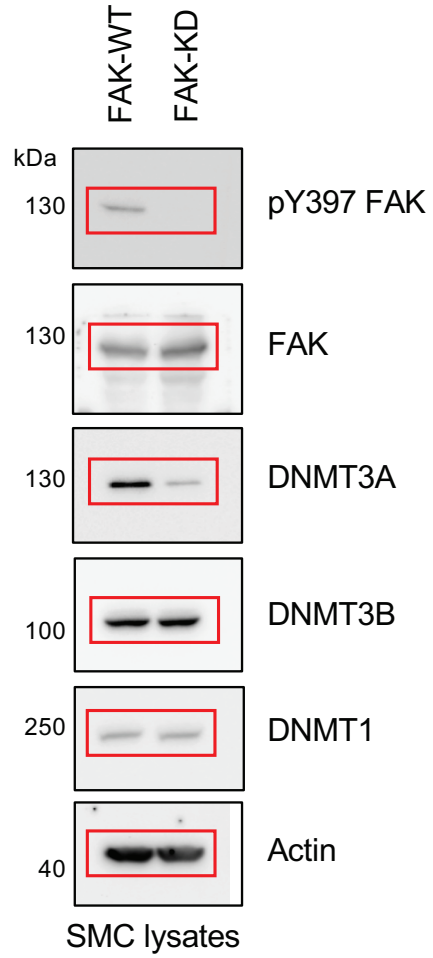**Figure 2**

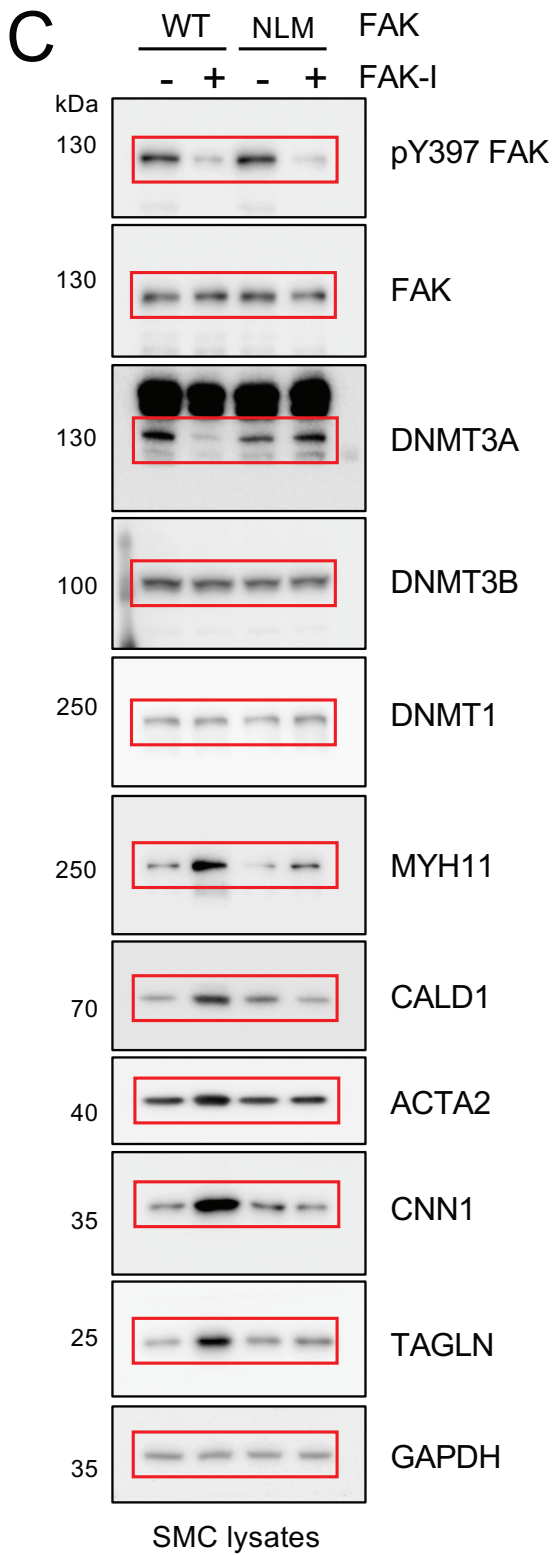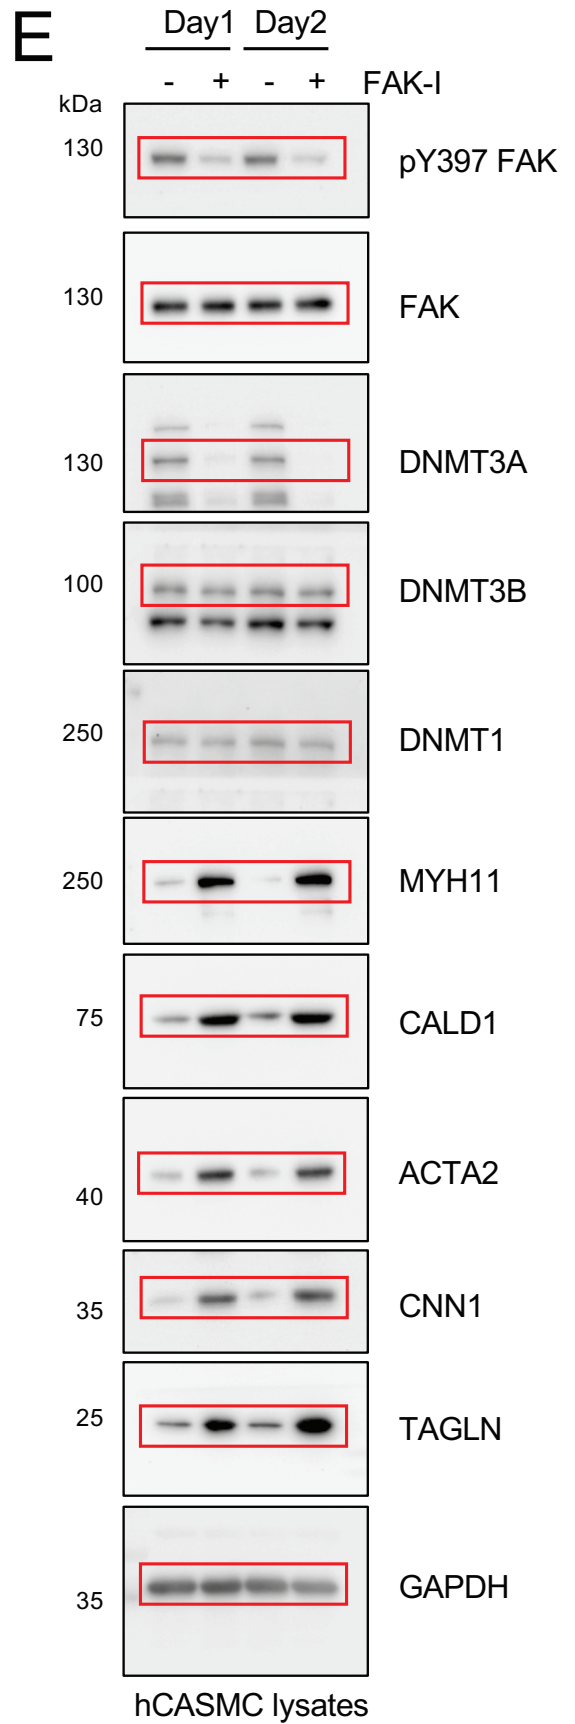

Figure 3

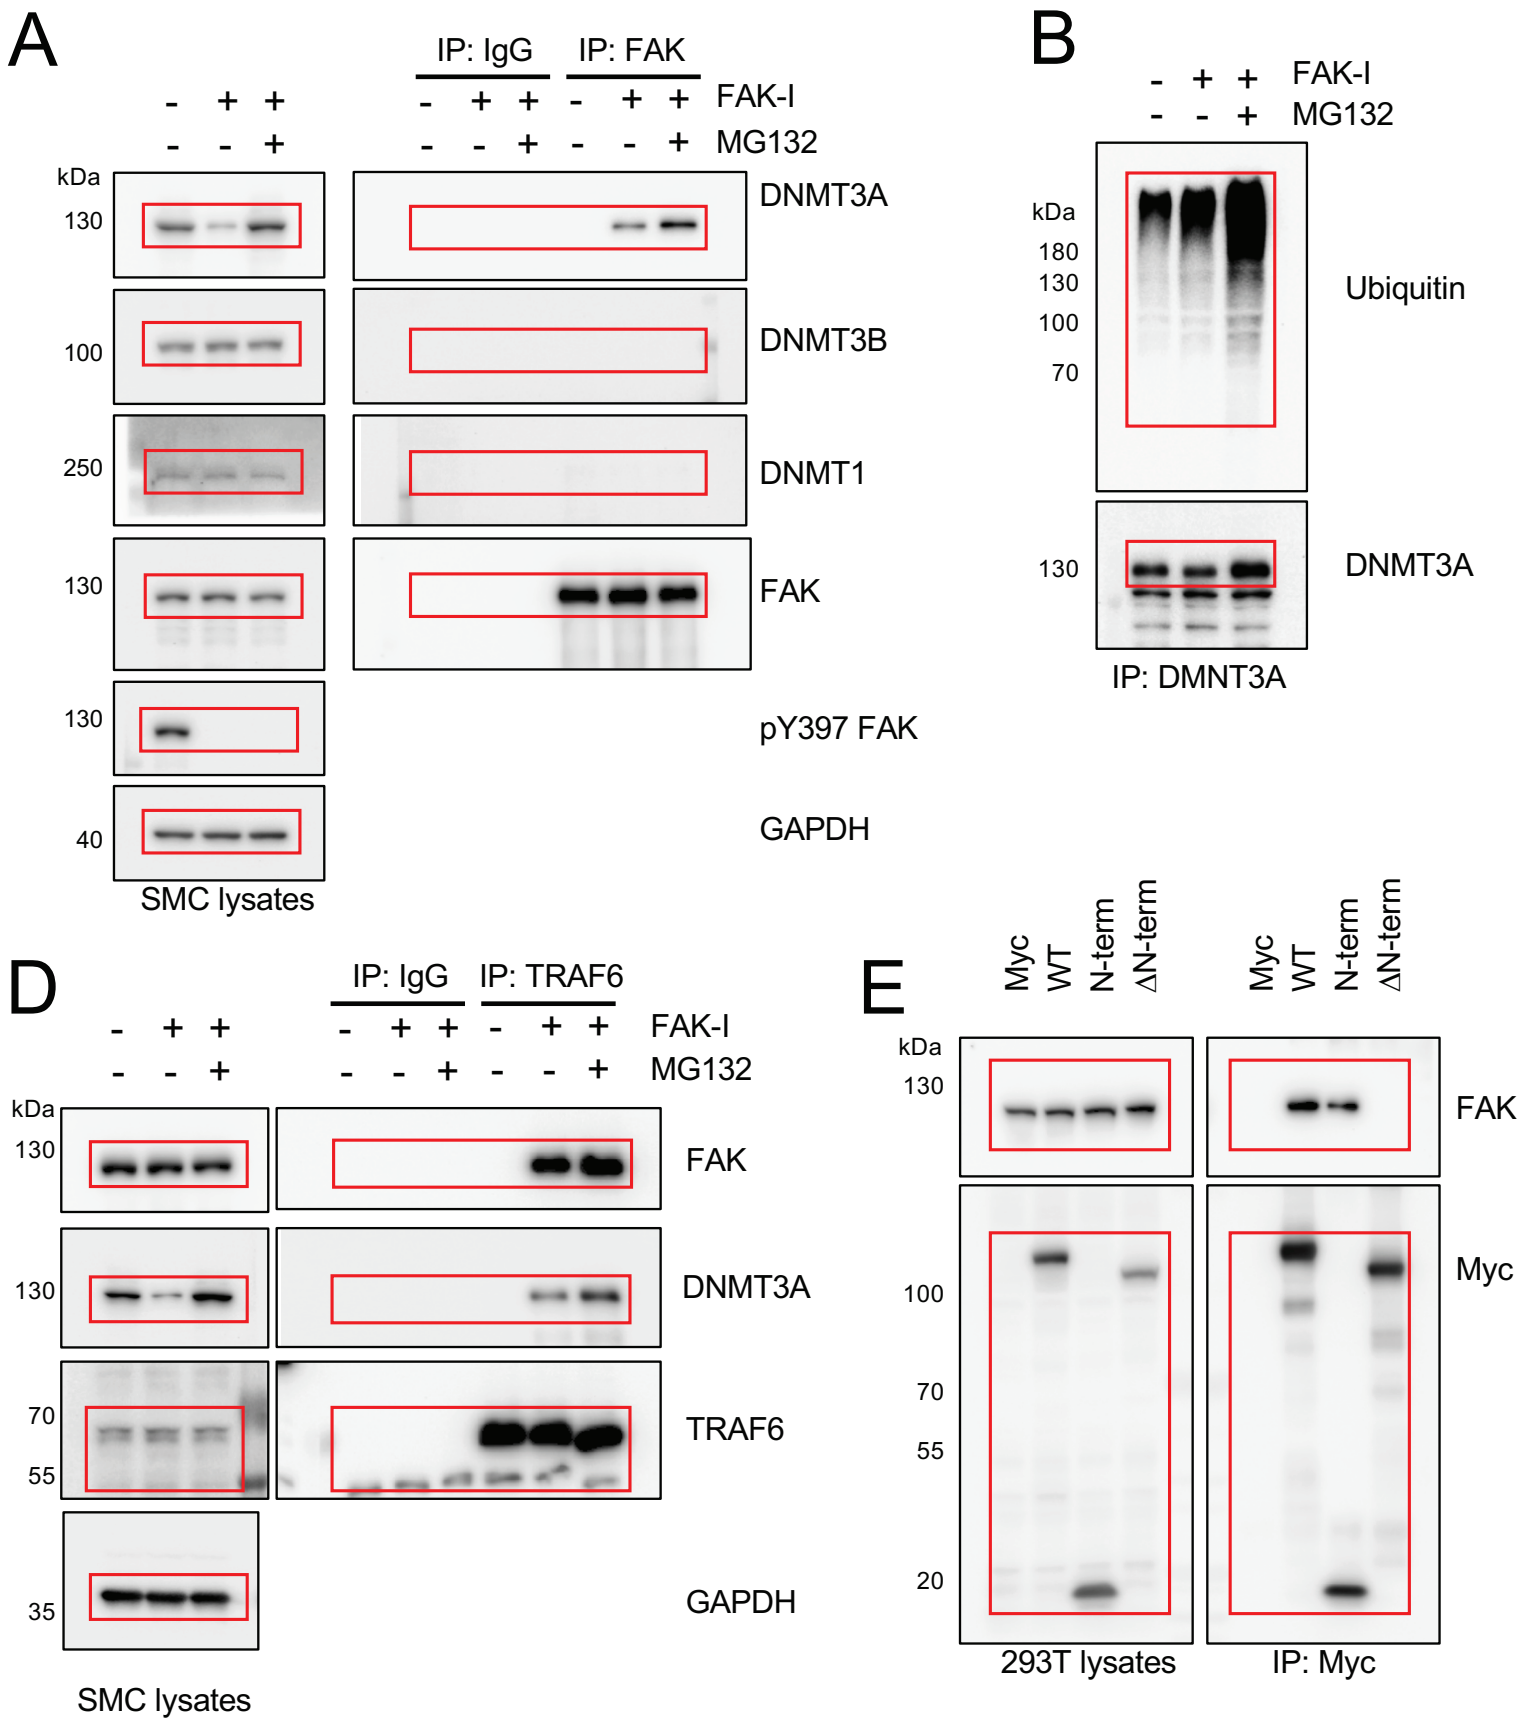

Figure 4

F

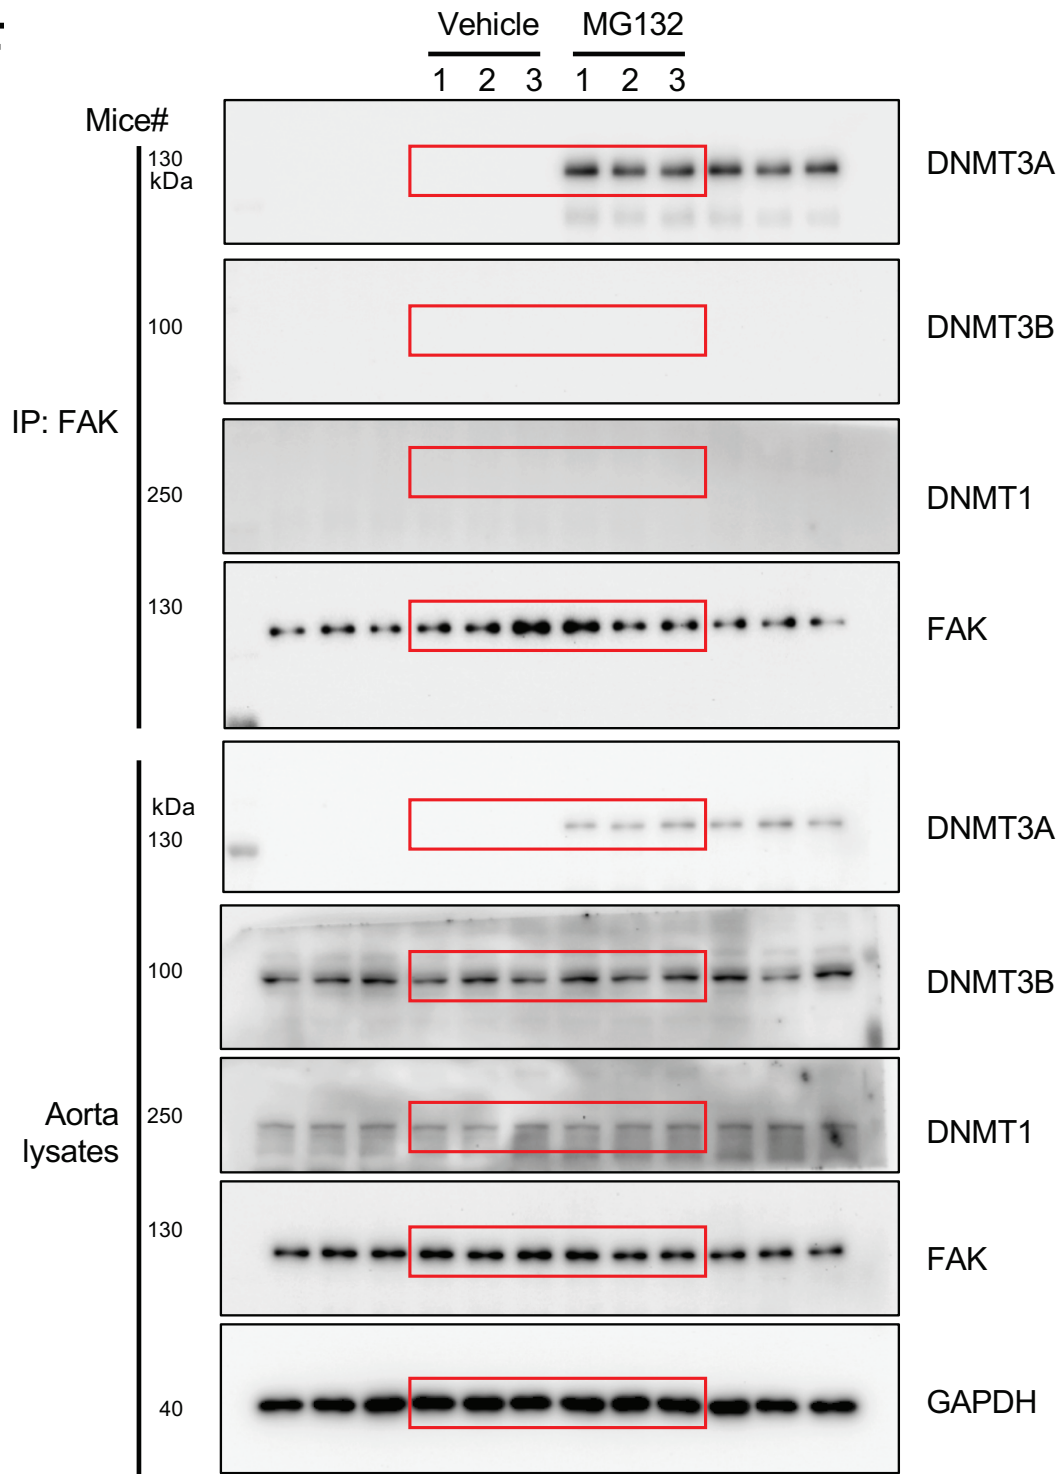

Figure 4

G

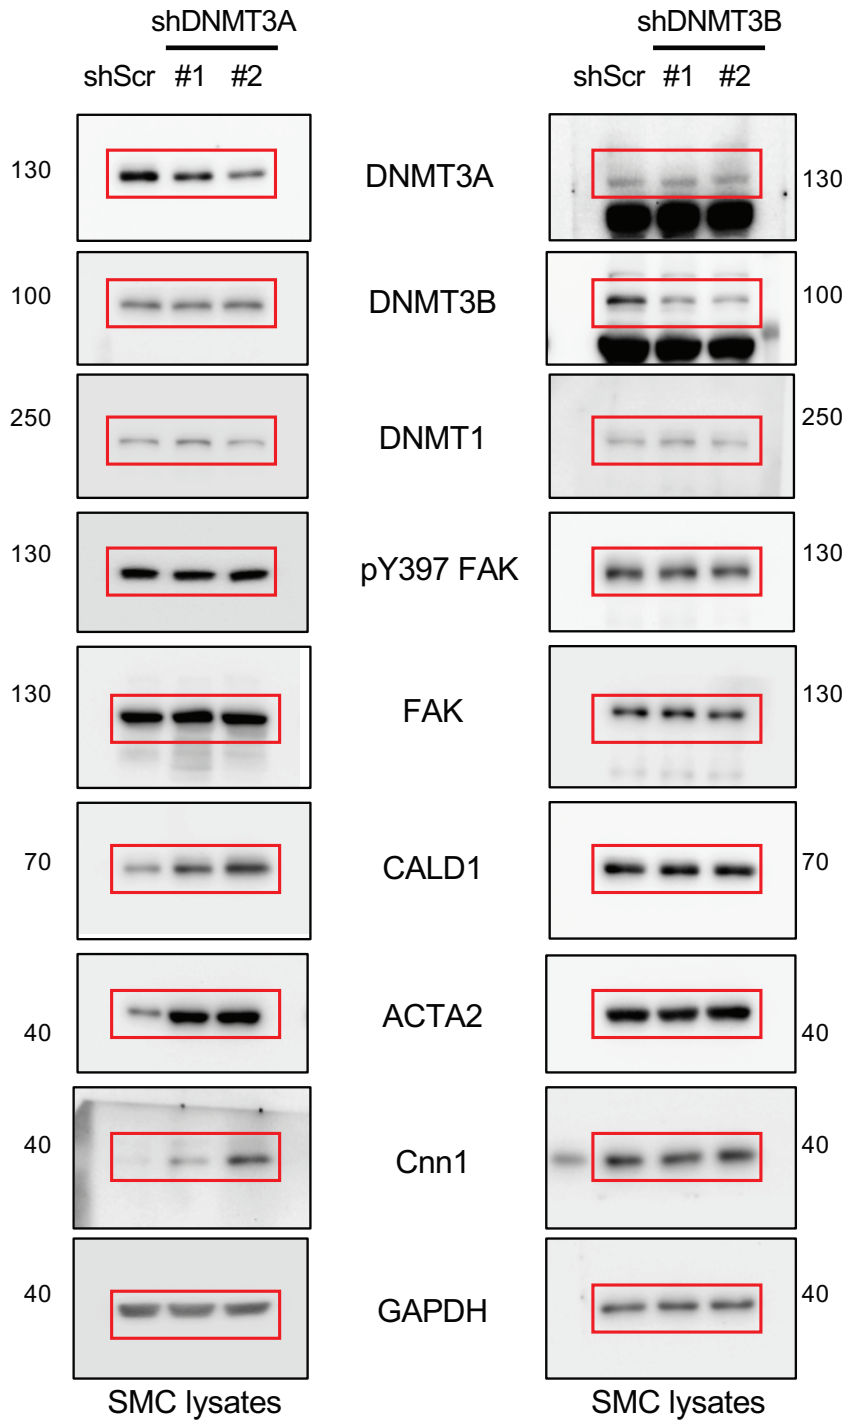

Figure 4

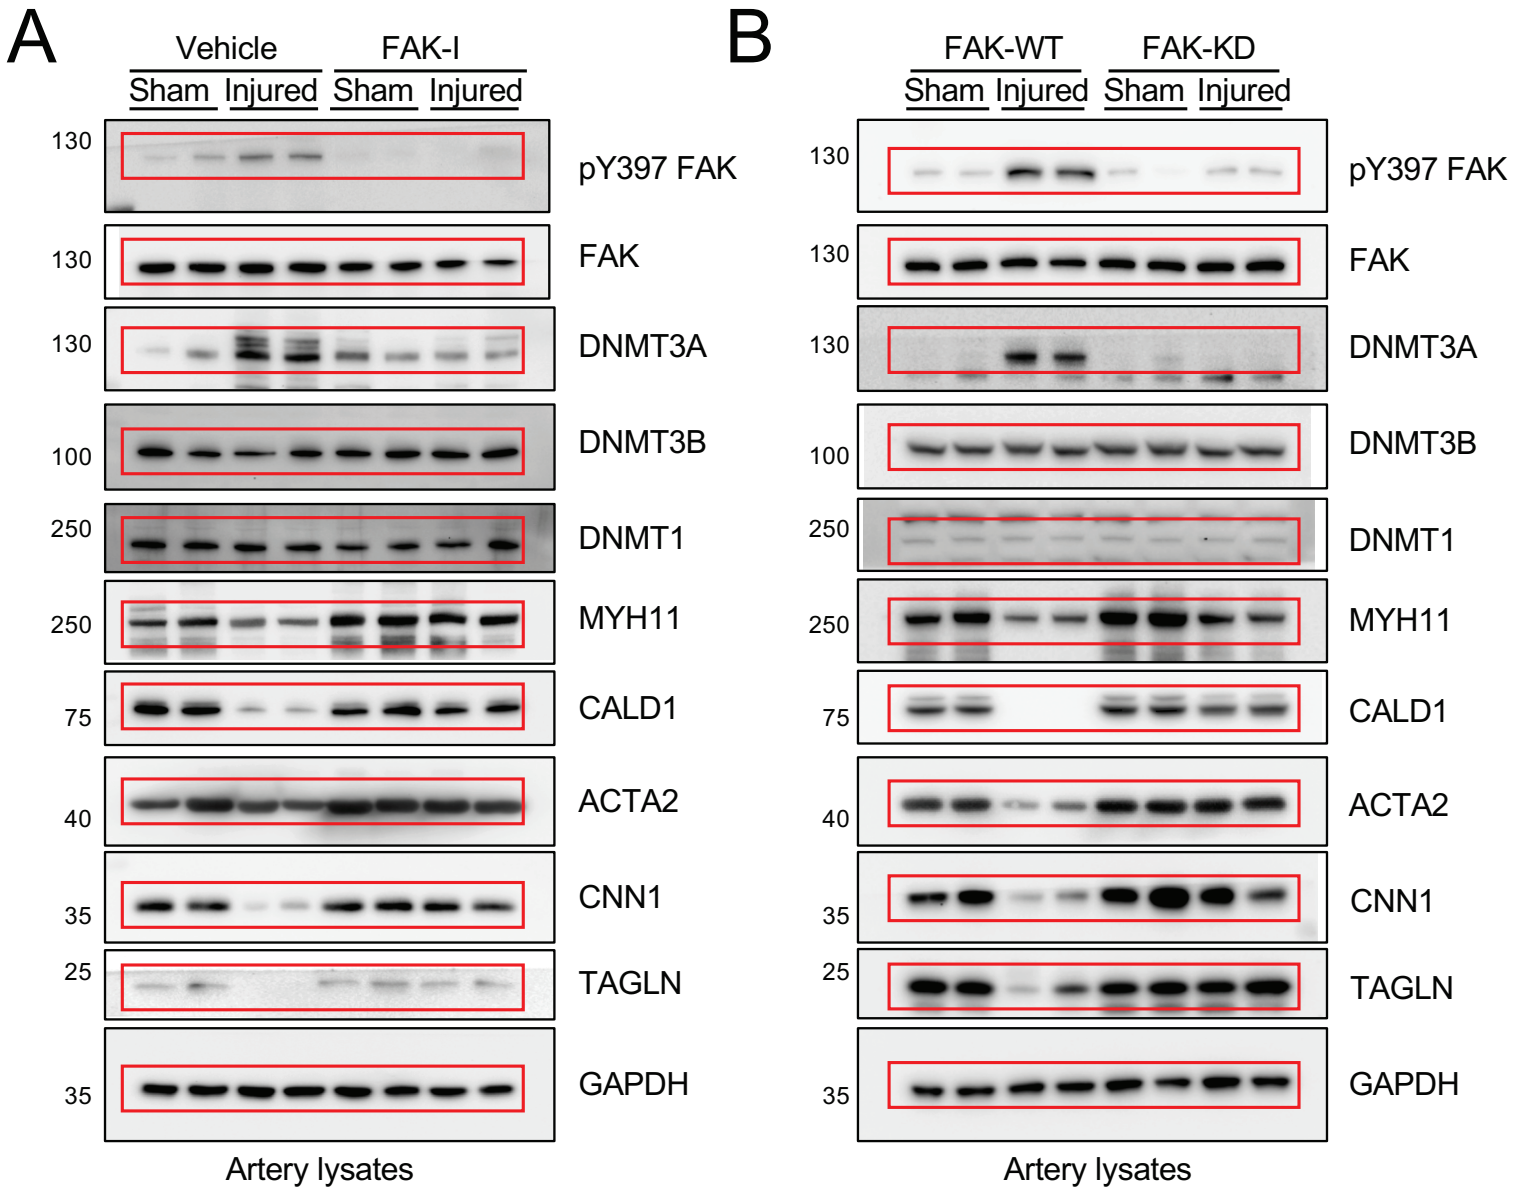

Figure 7

A

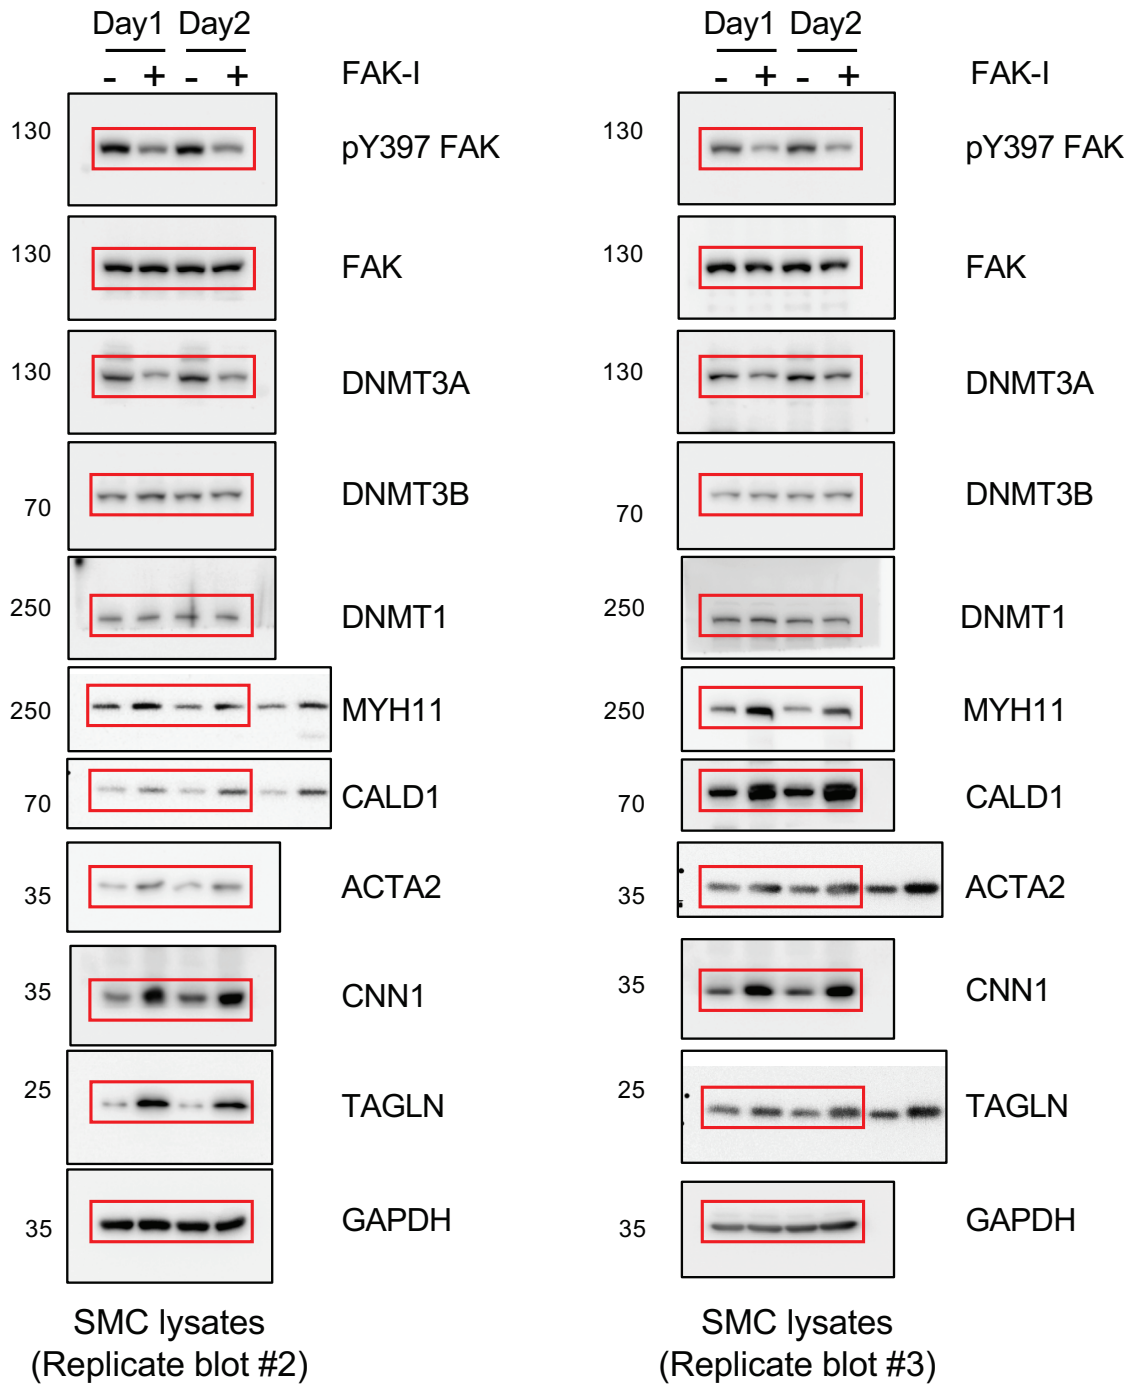



**B**

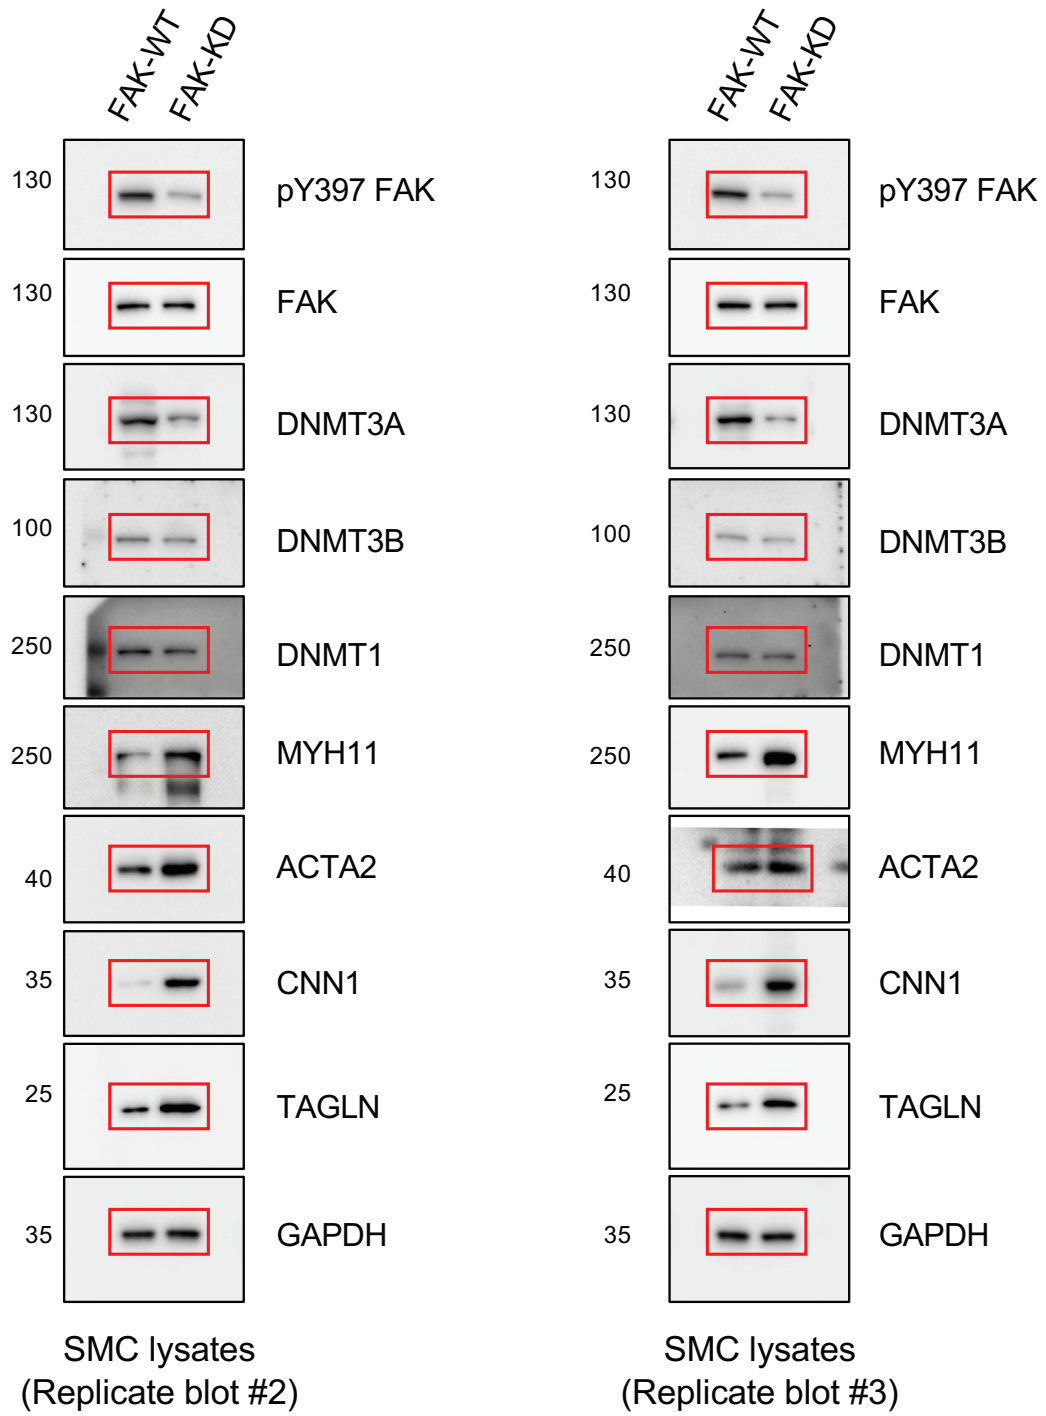

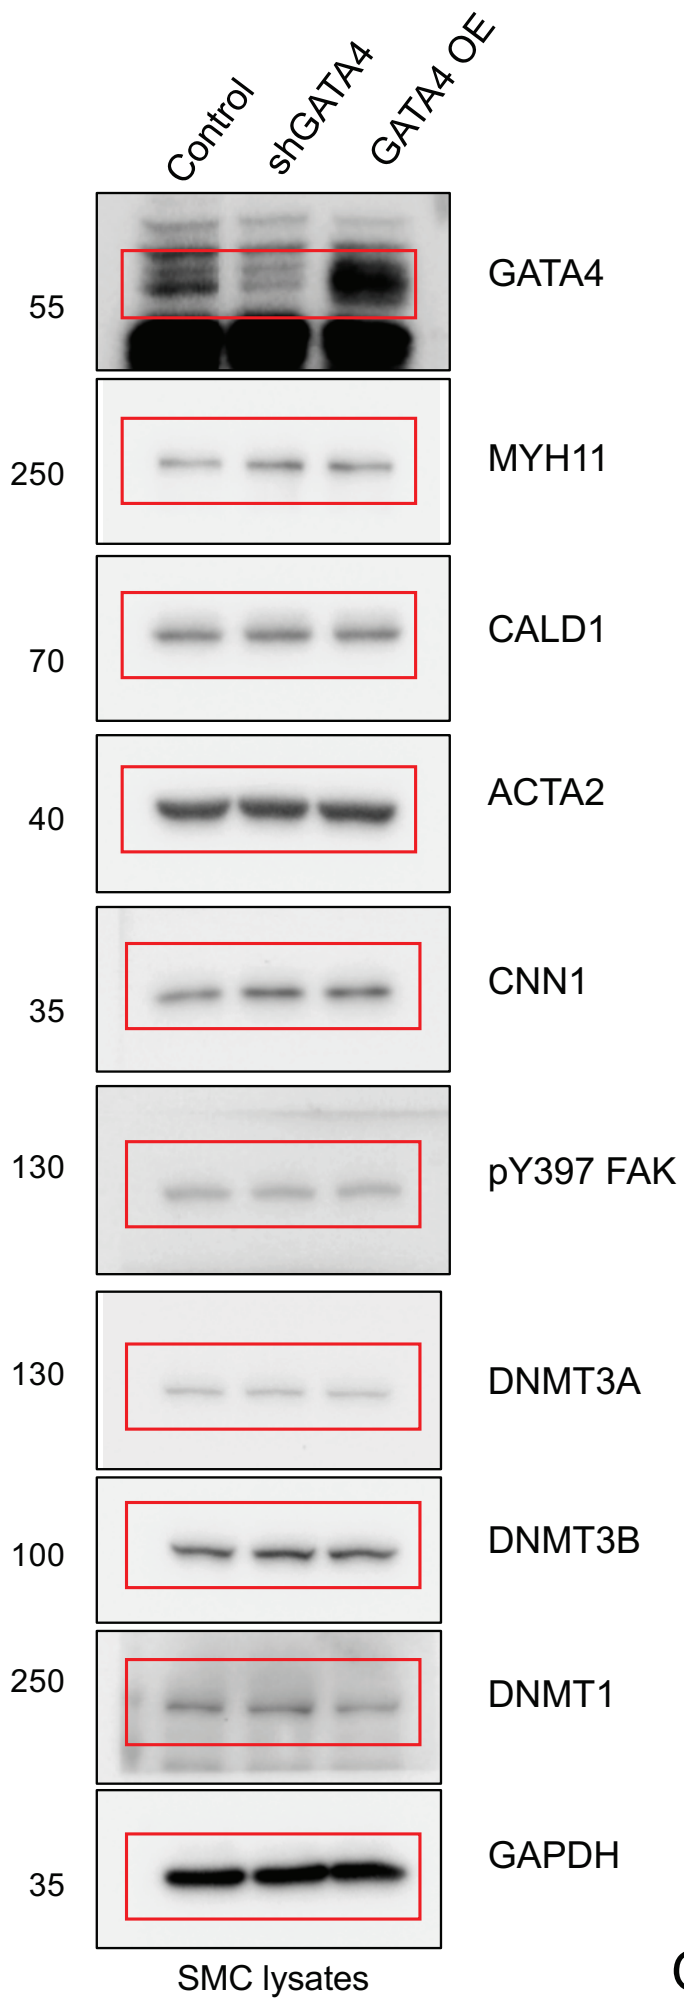

SMC lysates

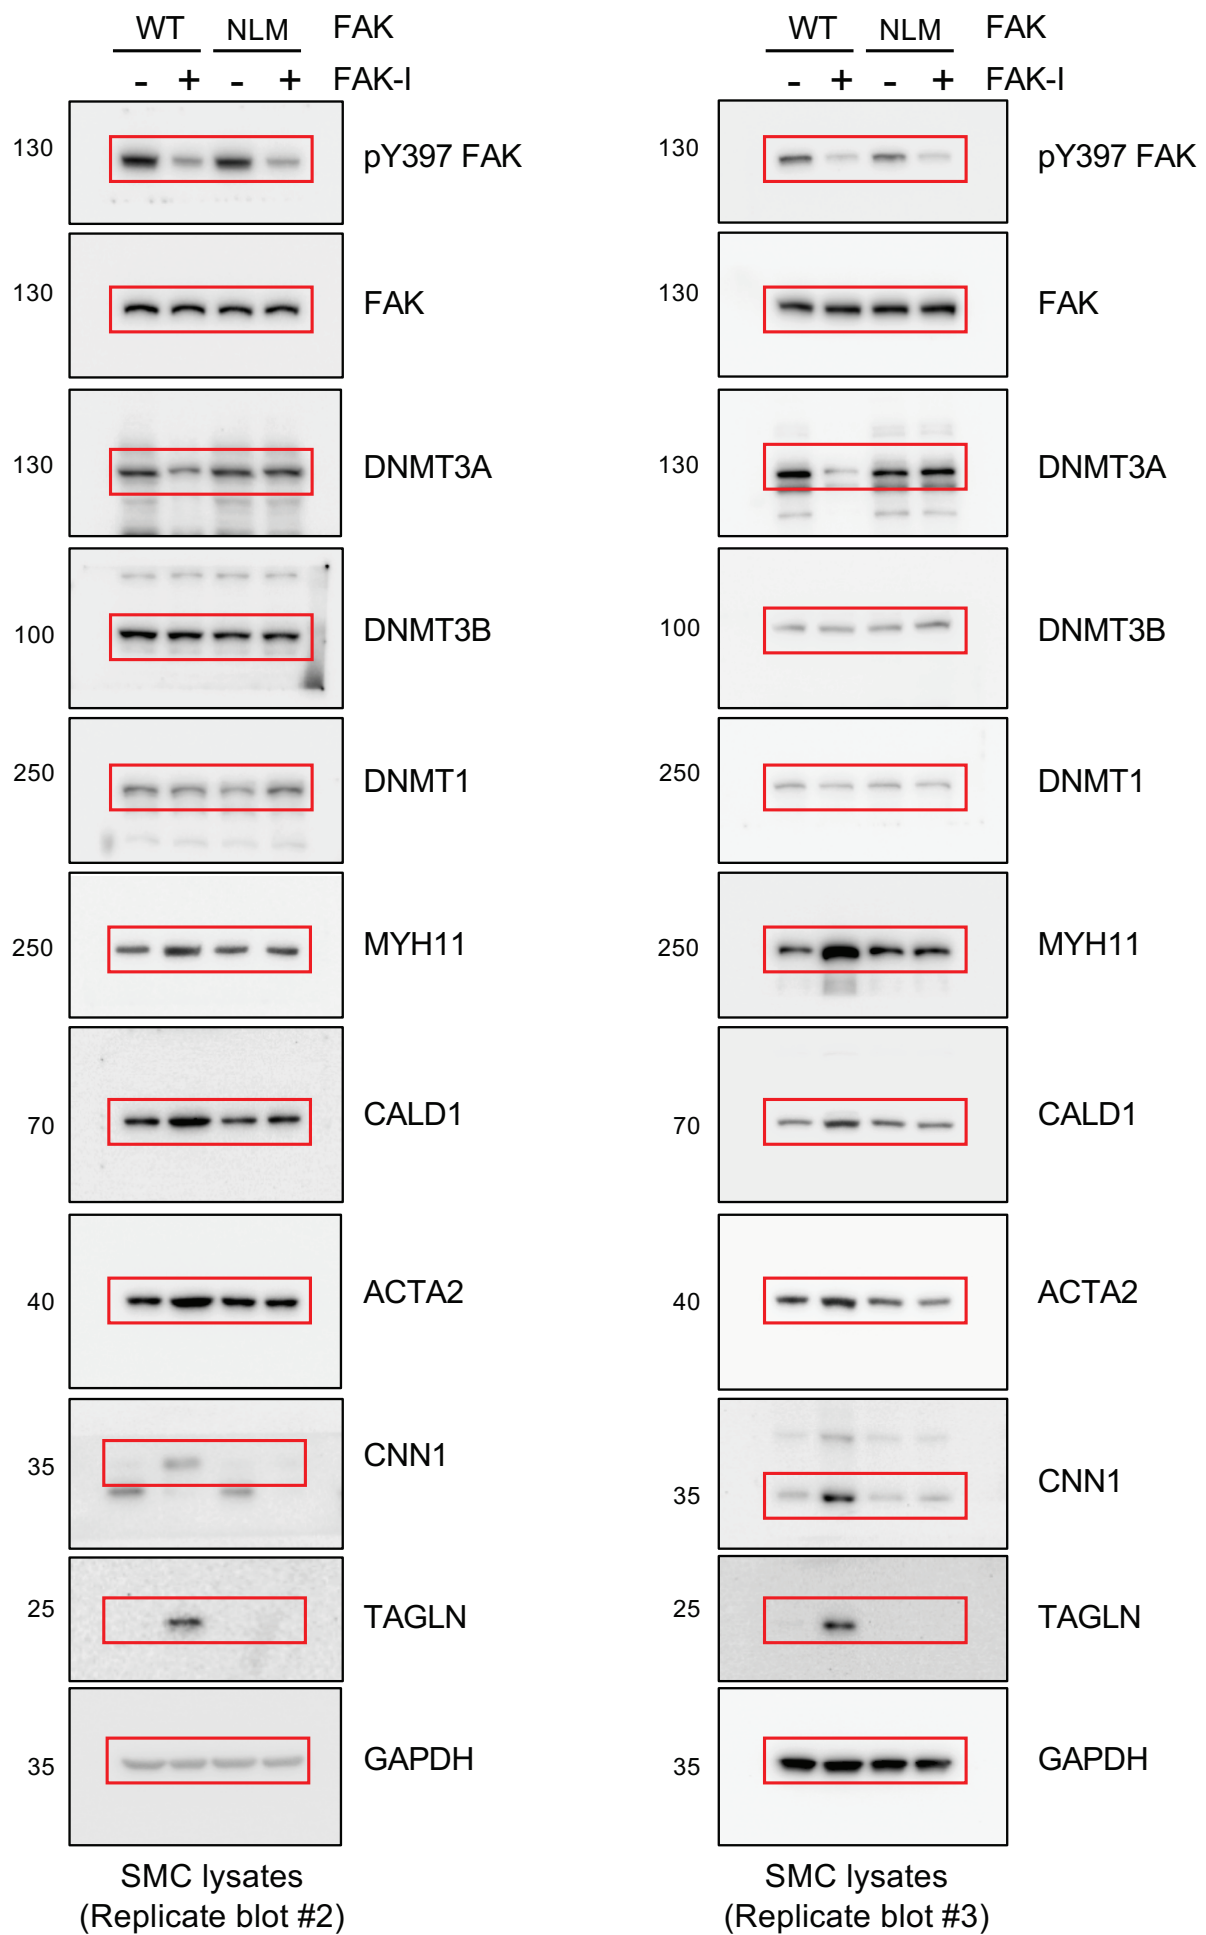

Online Figure XVII

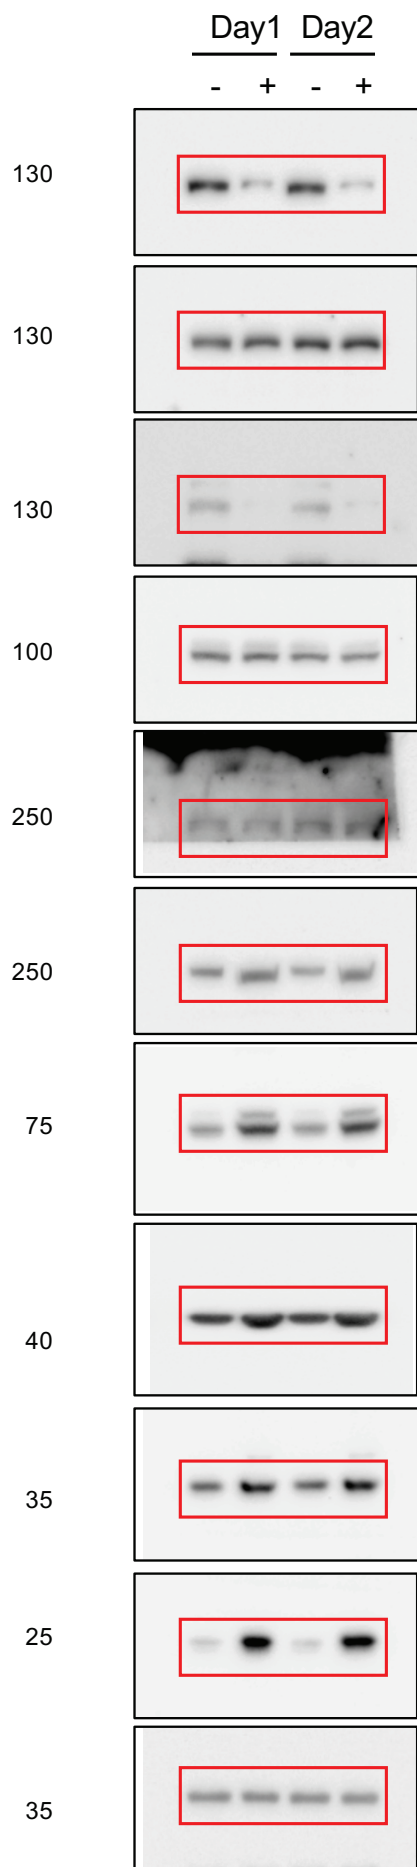

hCASMC lysates  
(Replicate blot #2)

FAK-I  
pY397 FAK  
FAK  
DNMT3A  
DNMT3B  
DNMT1  
MYH11  
CALD1  
ACTA2  
CNN1  
TAGLN  
GAPDH

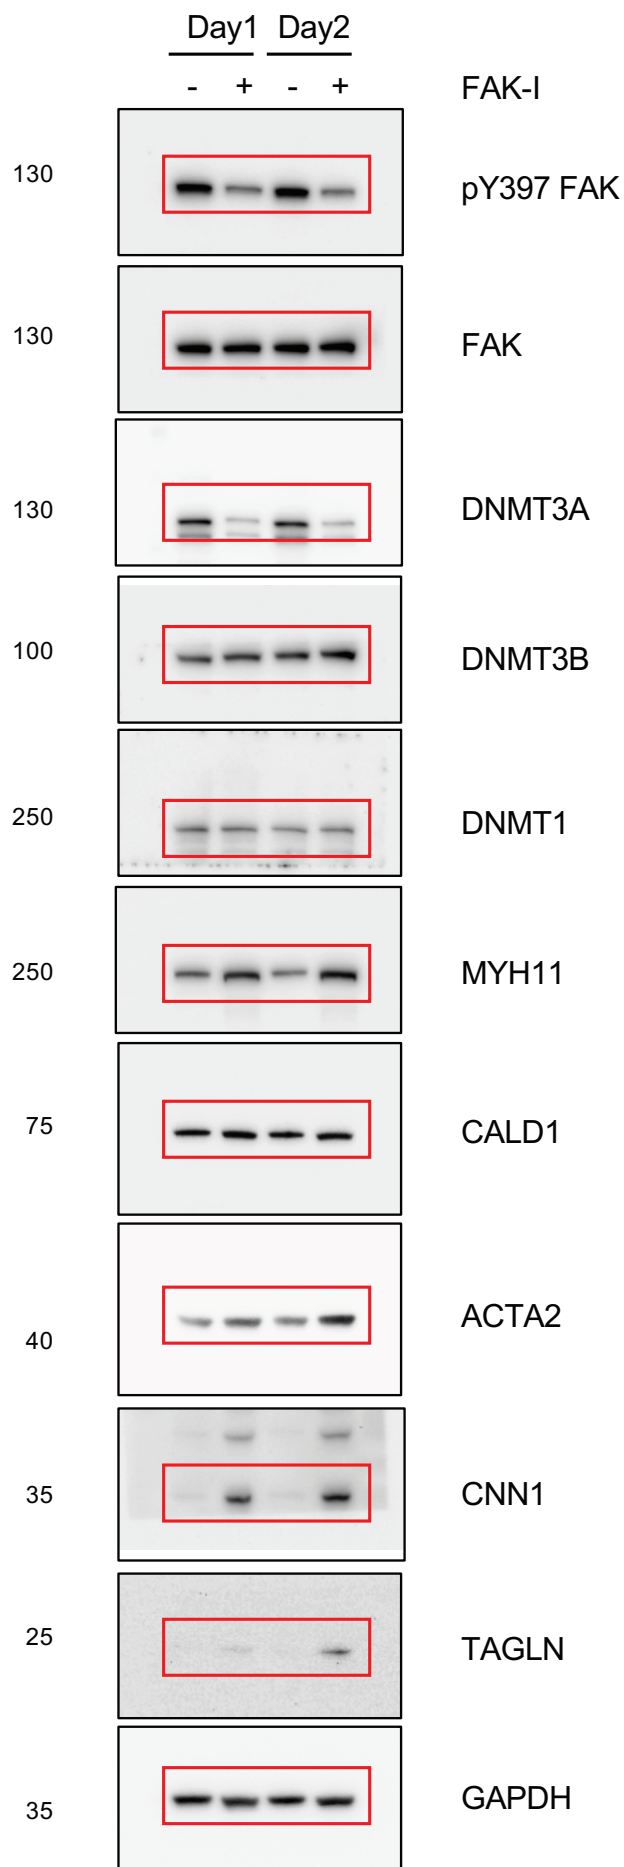

hCASMC lysates  
(Replicate blot #3)

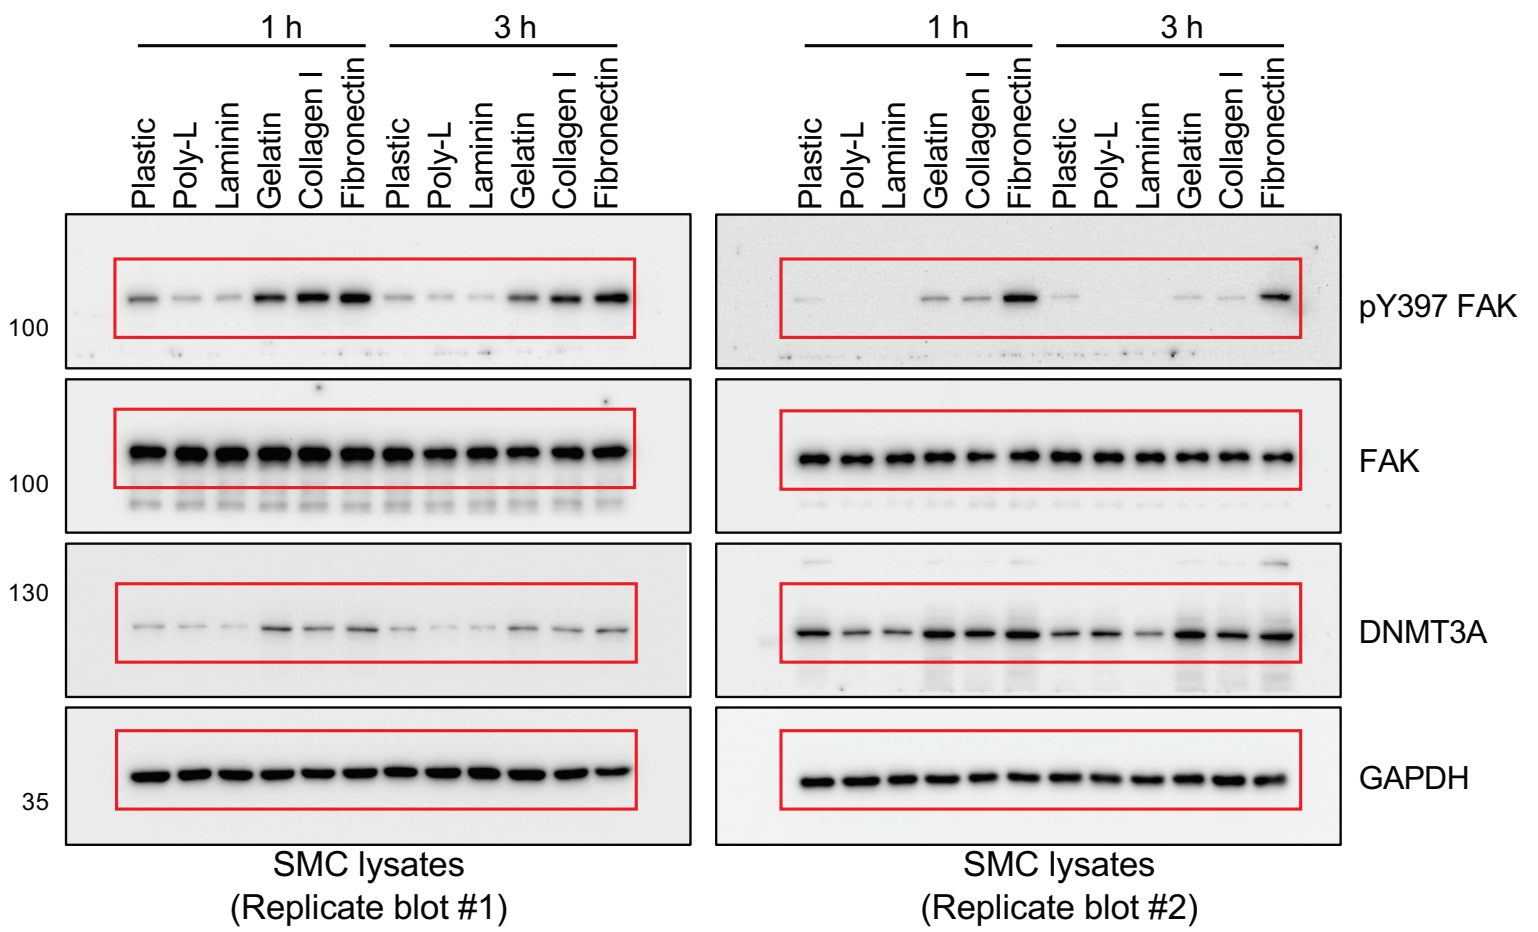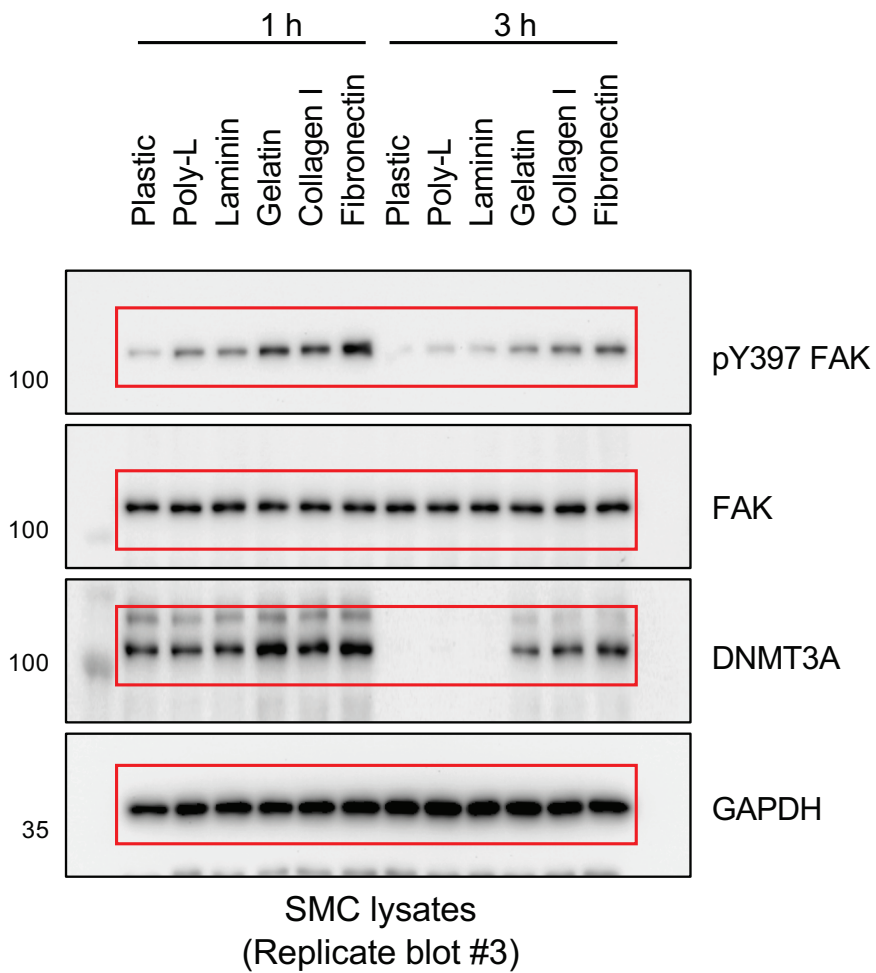

**A**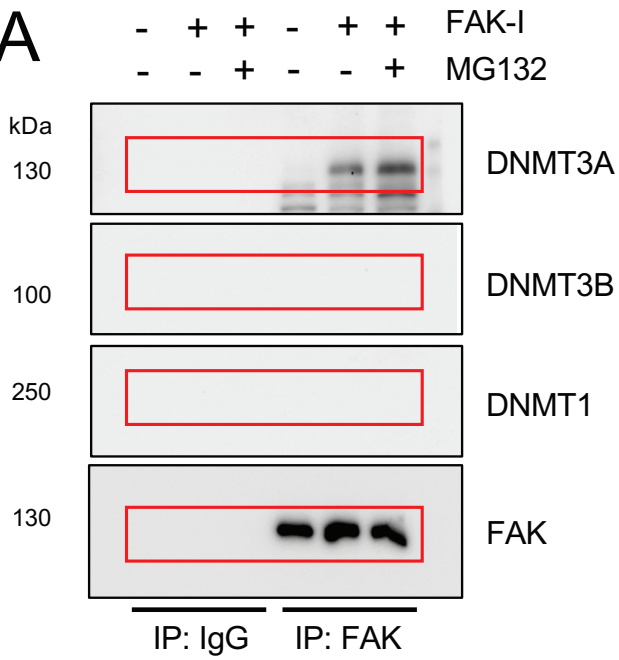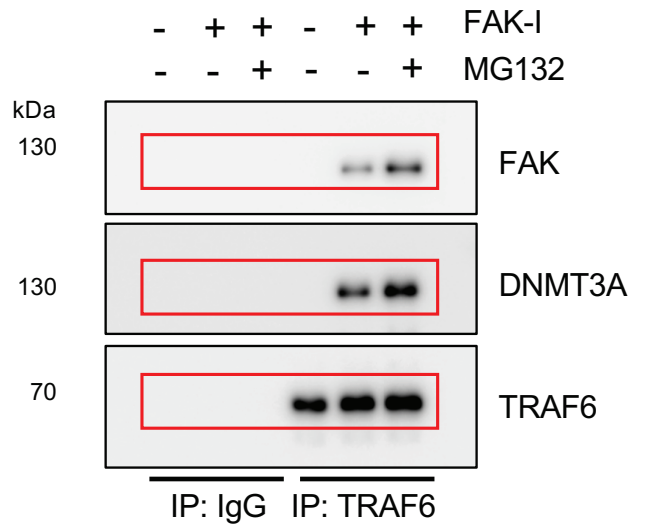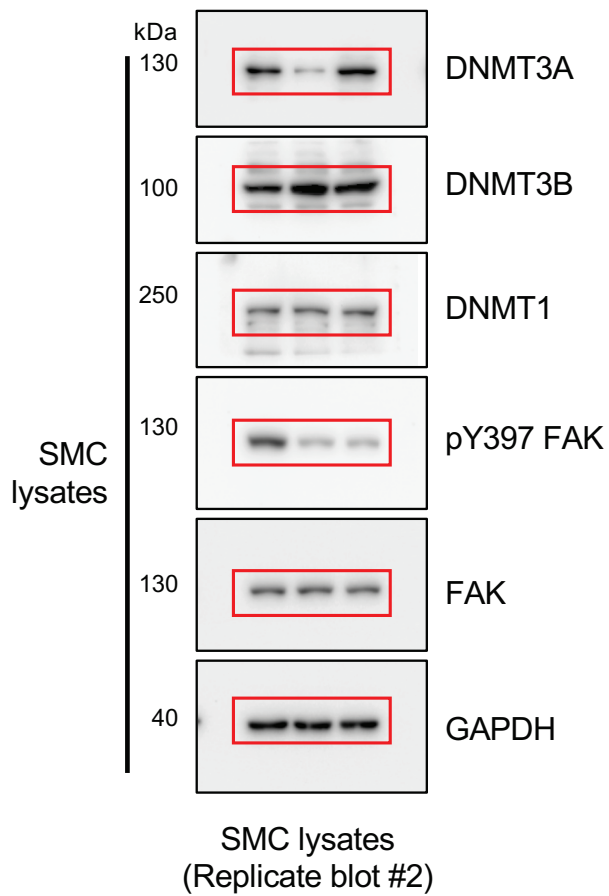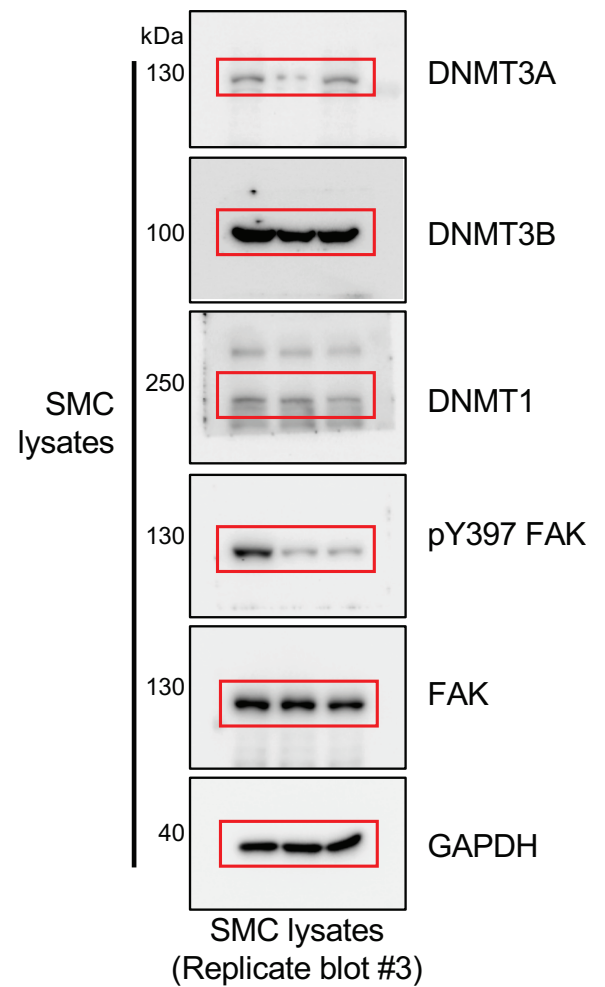

A

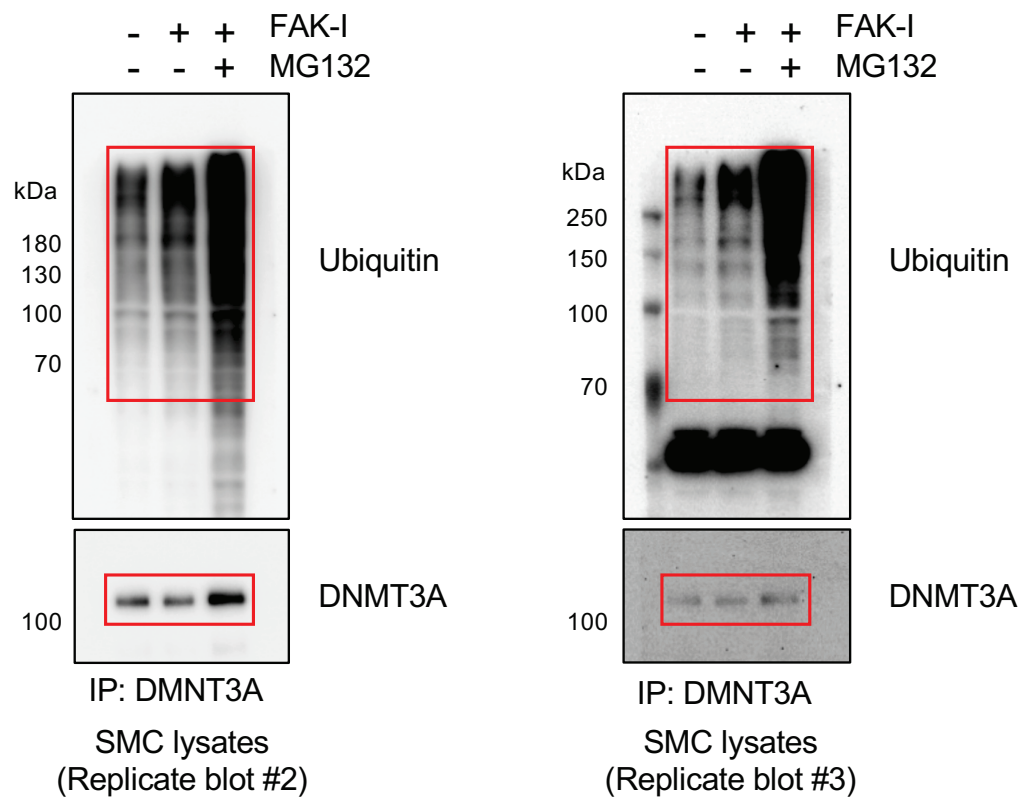



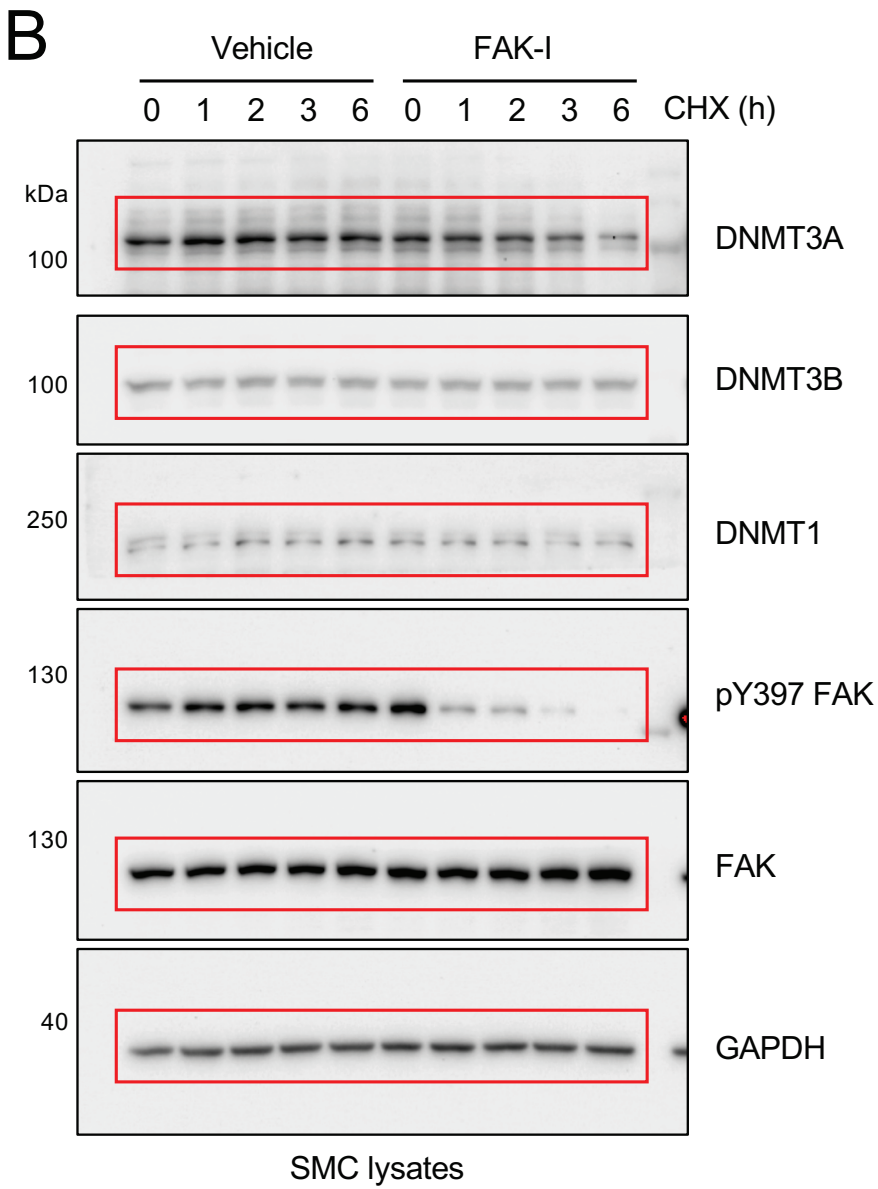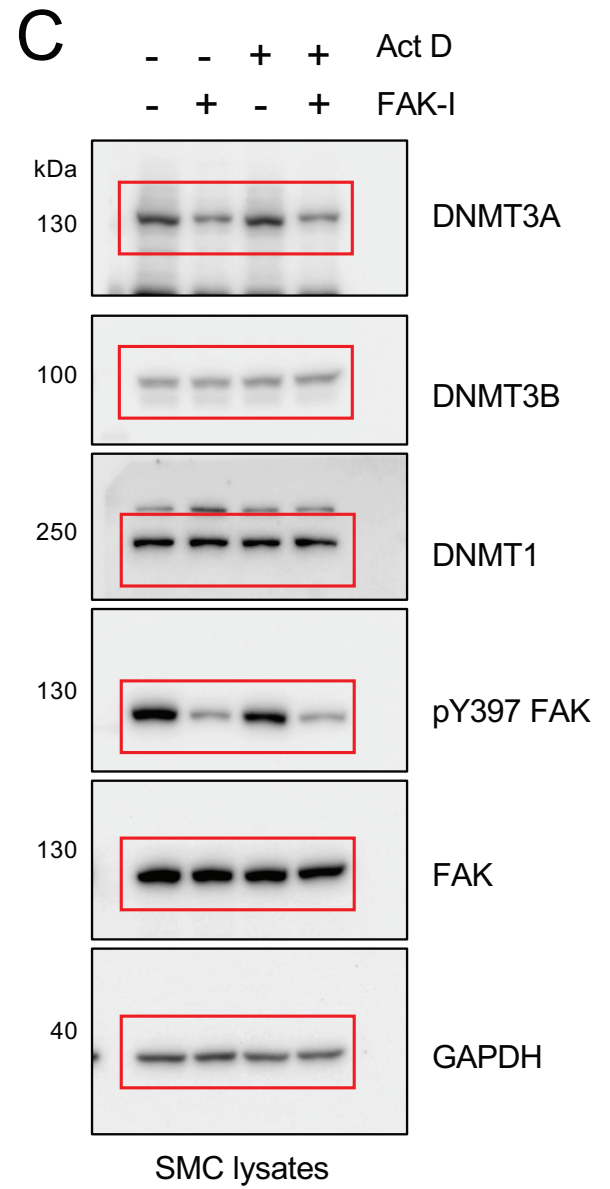



**A**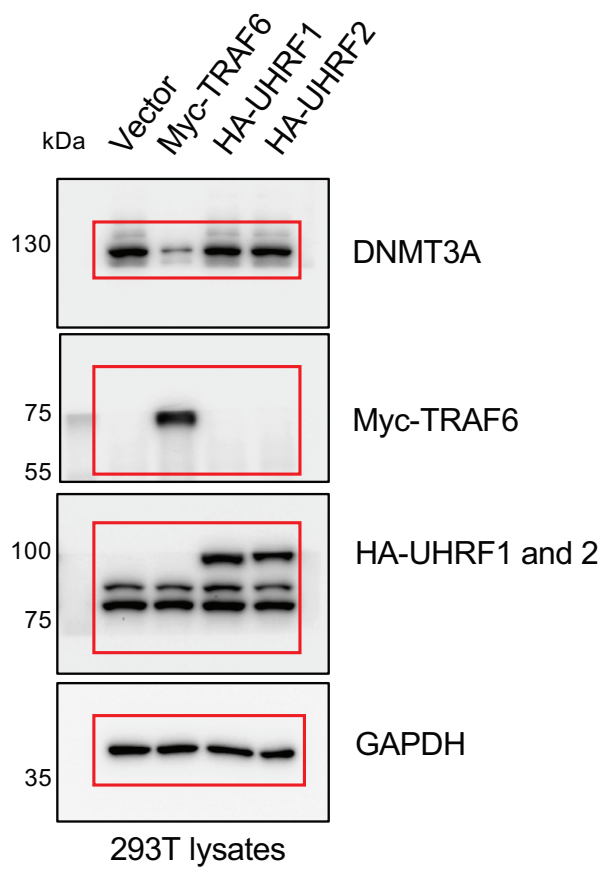**C**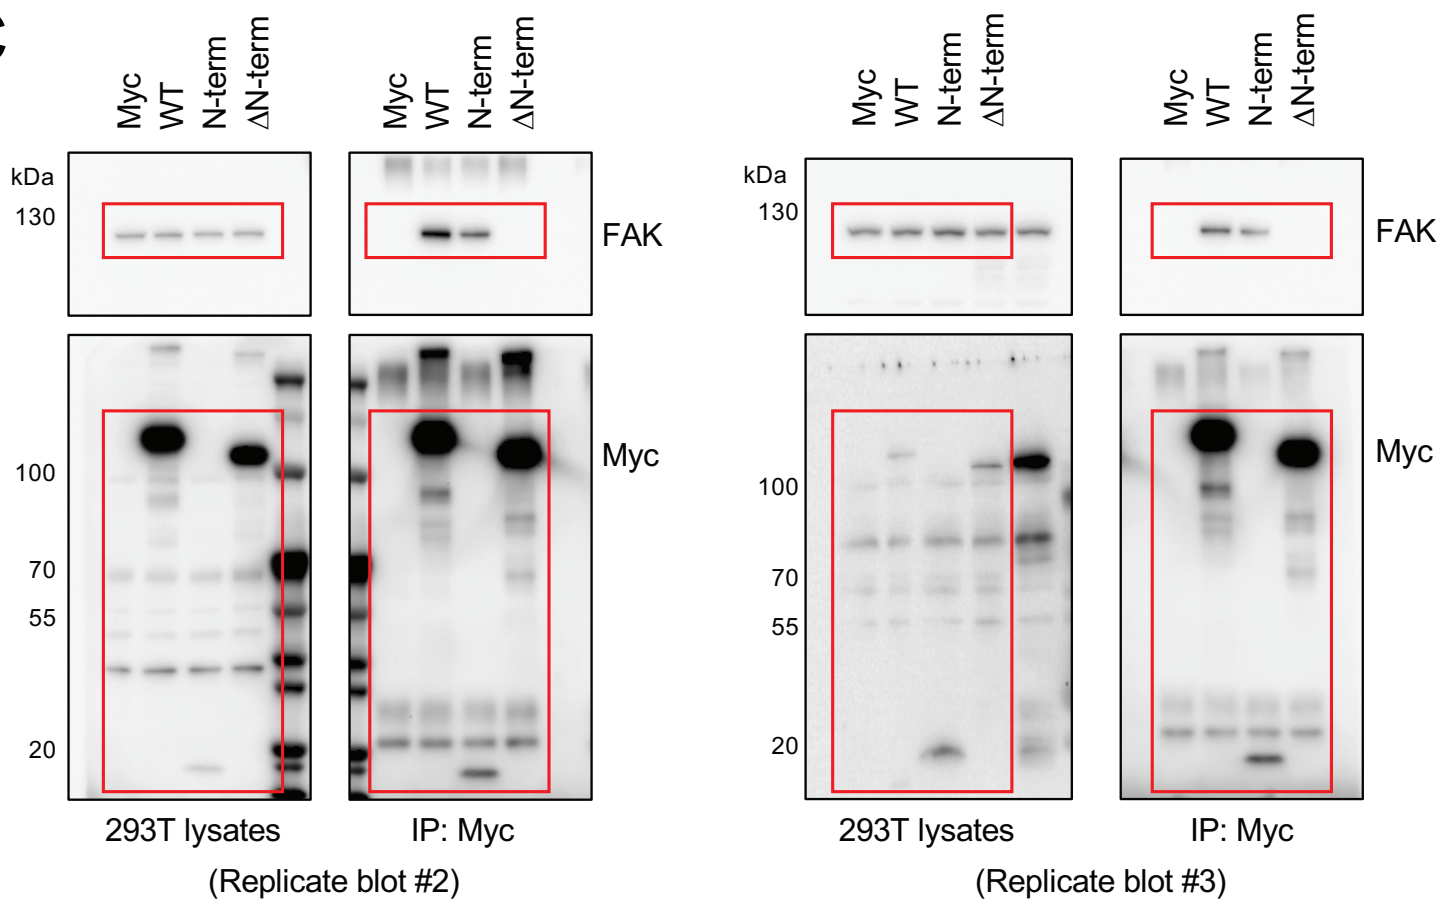

D

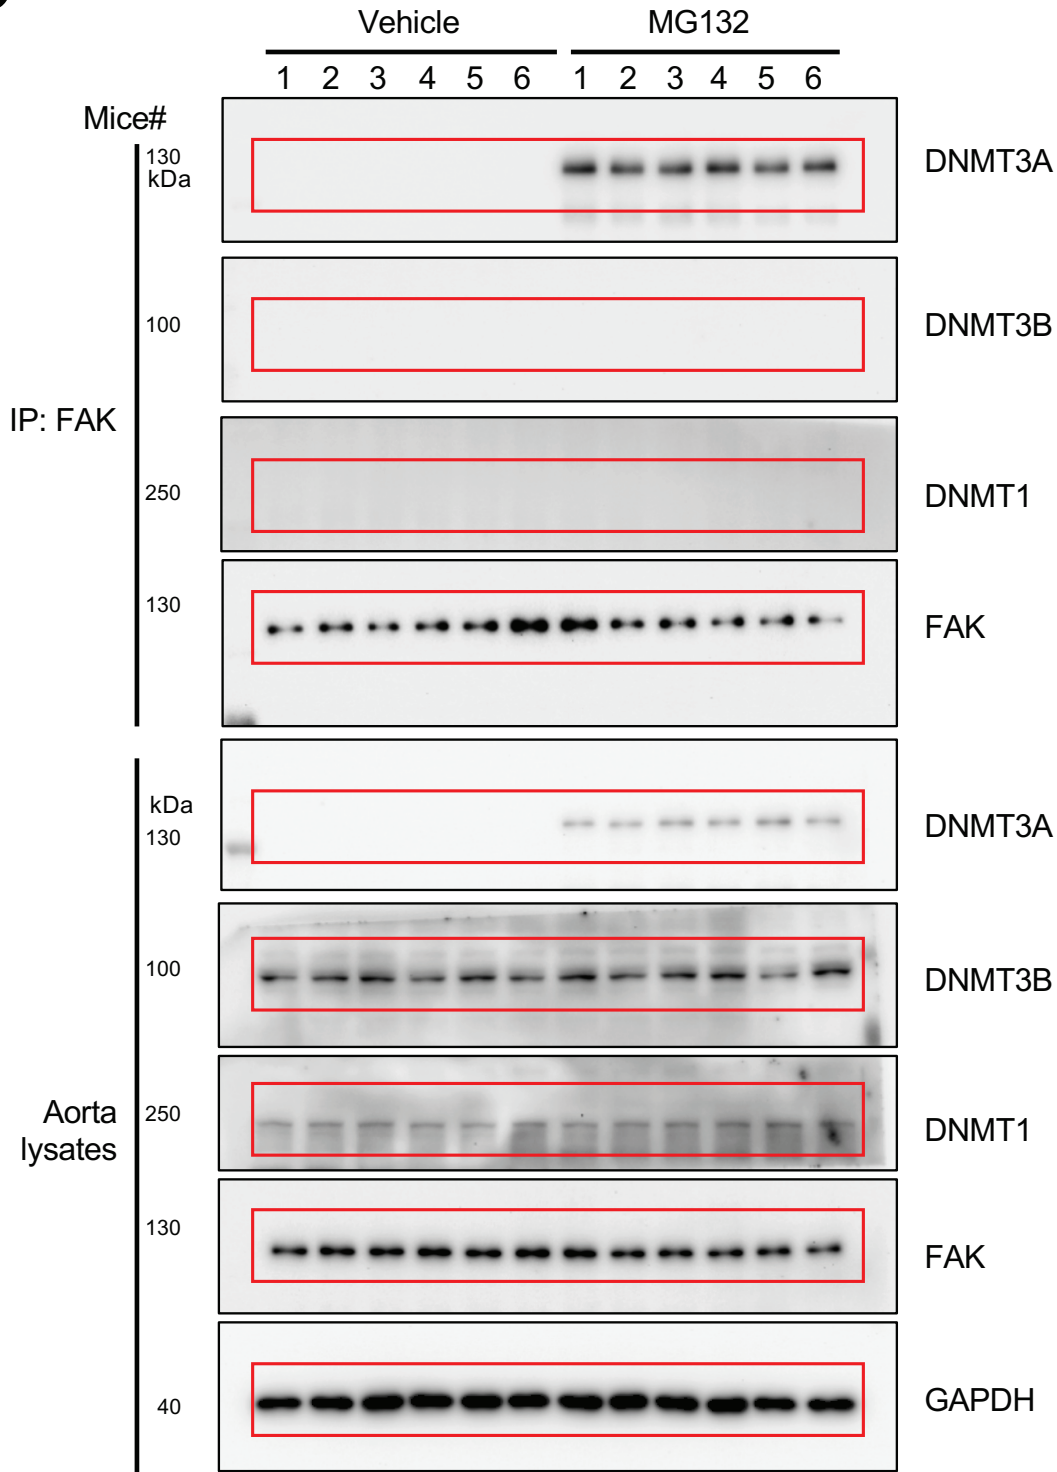

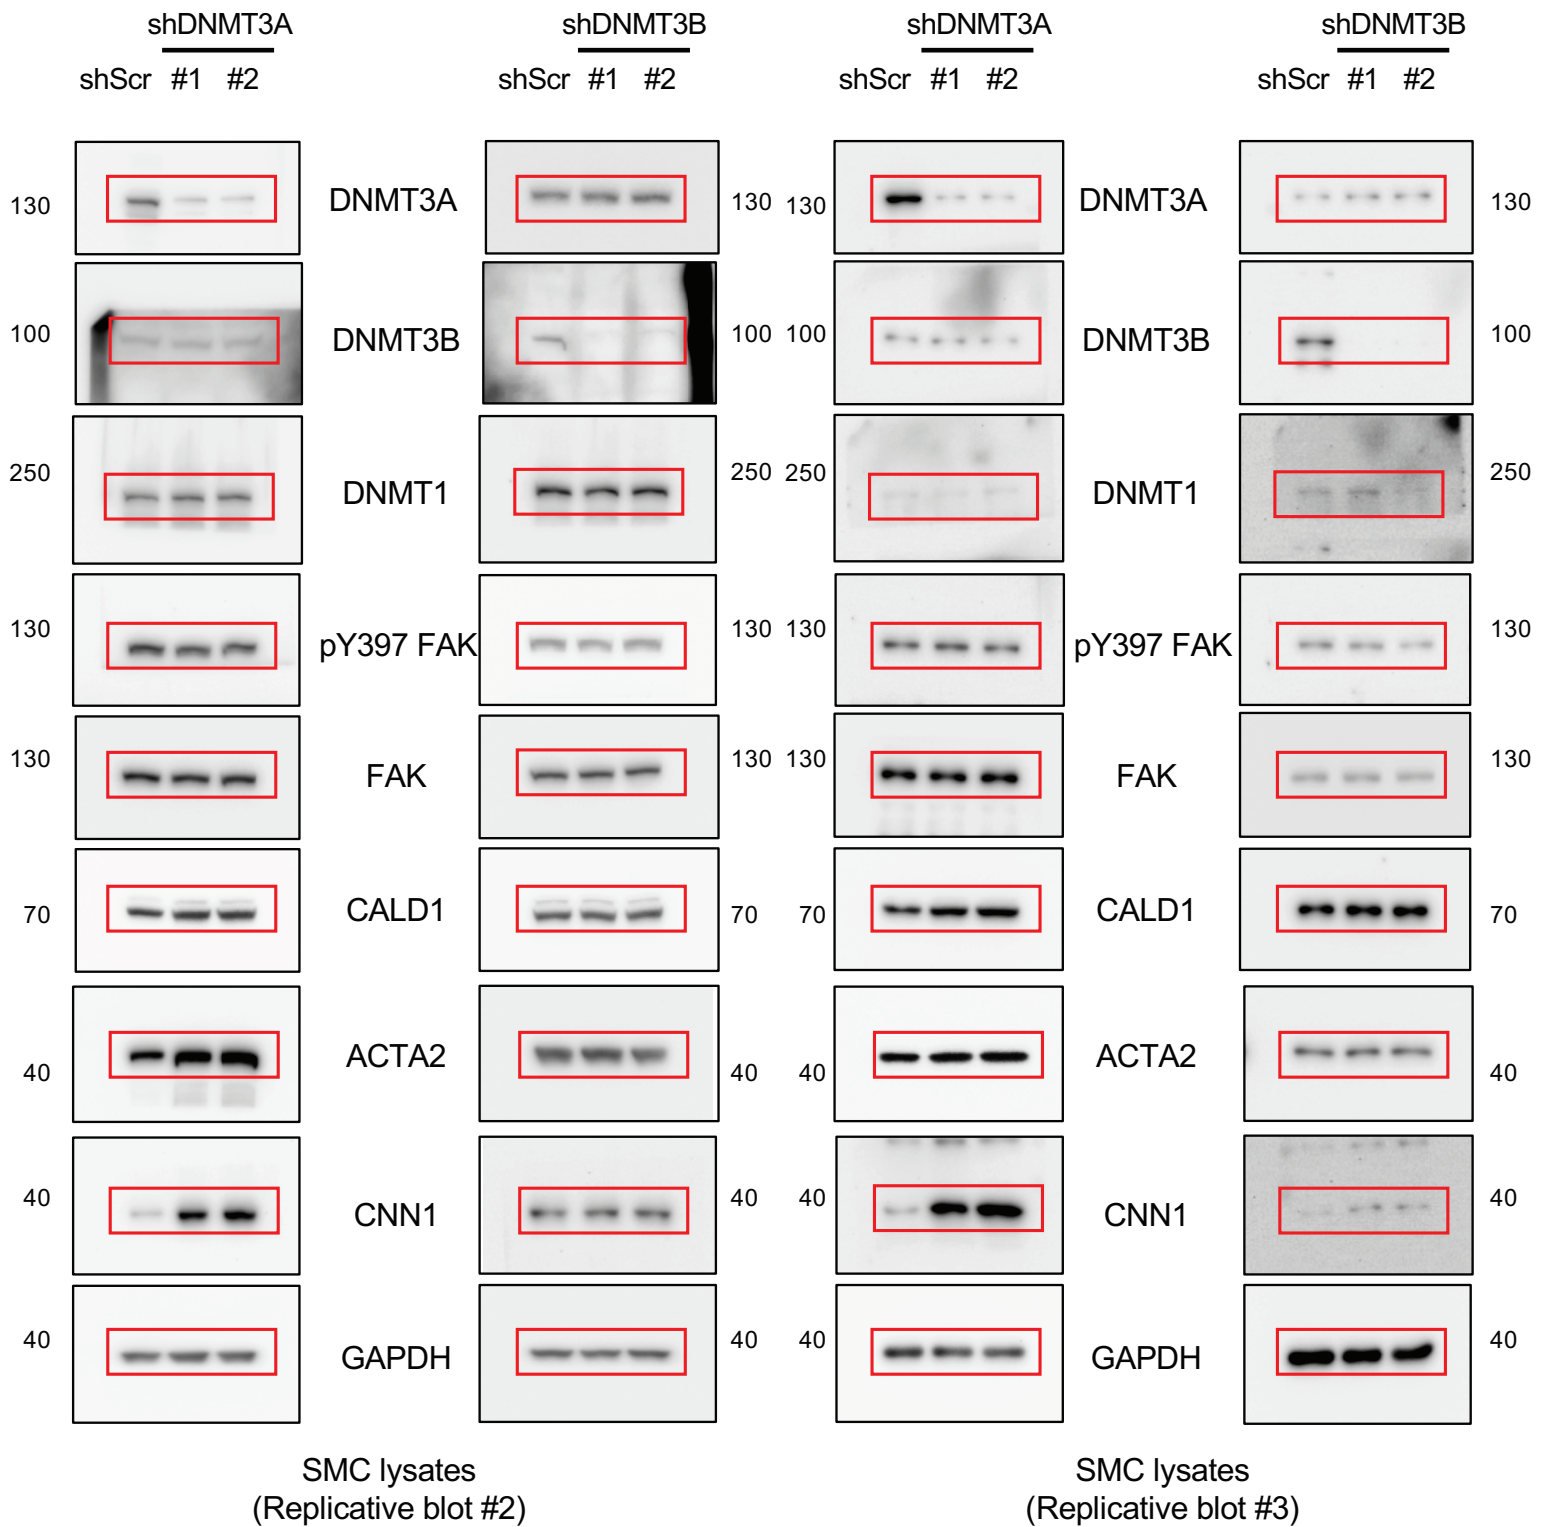

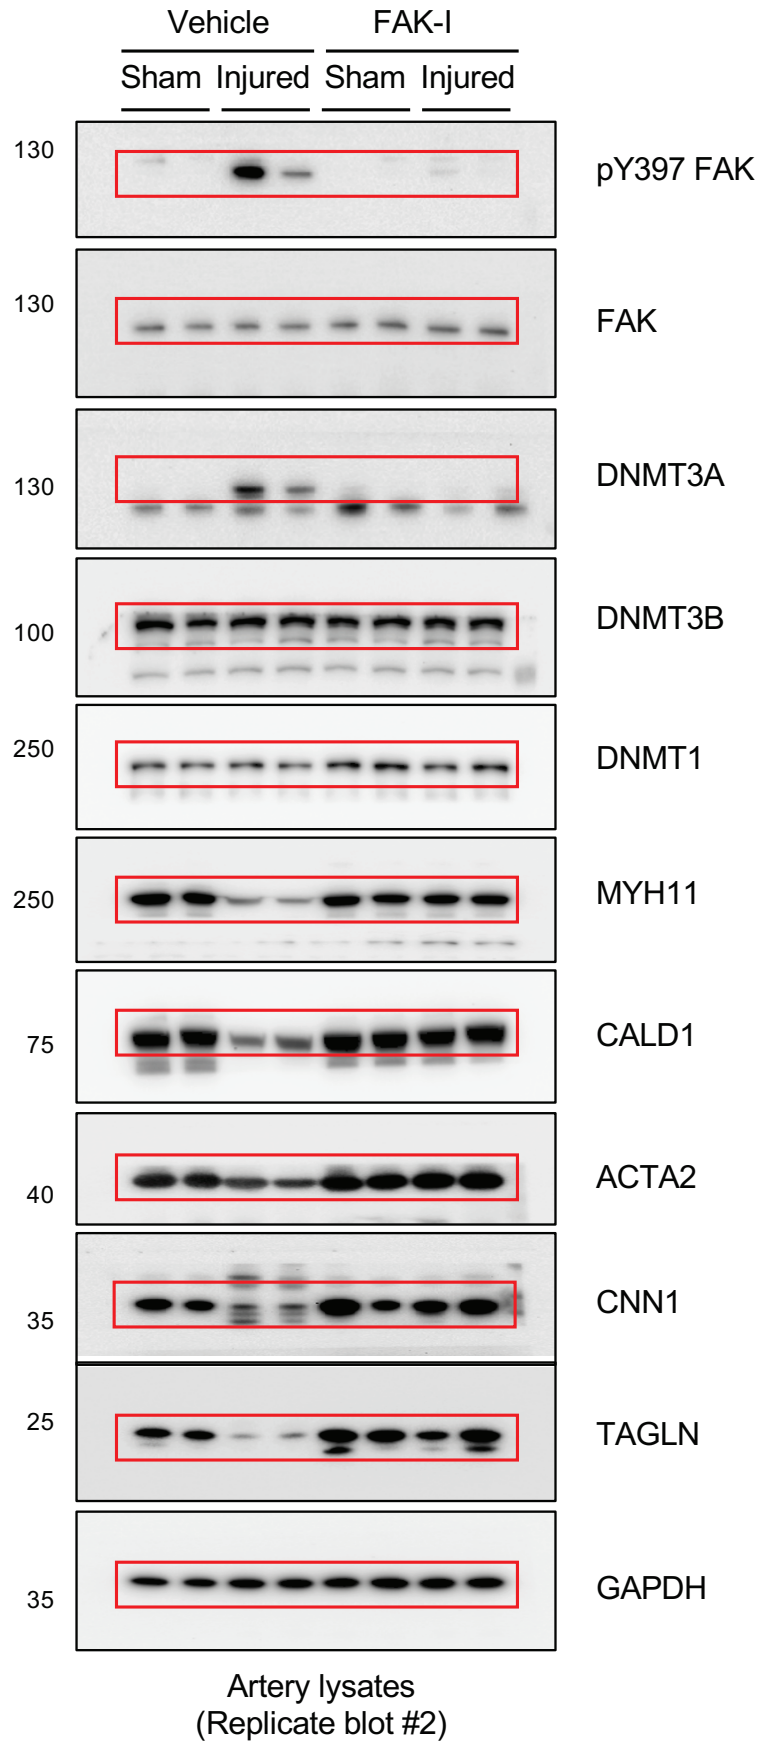

Artery lysates  
(Replicate blot #2)

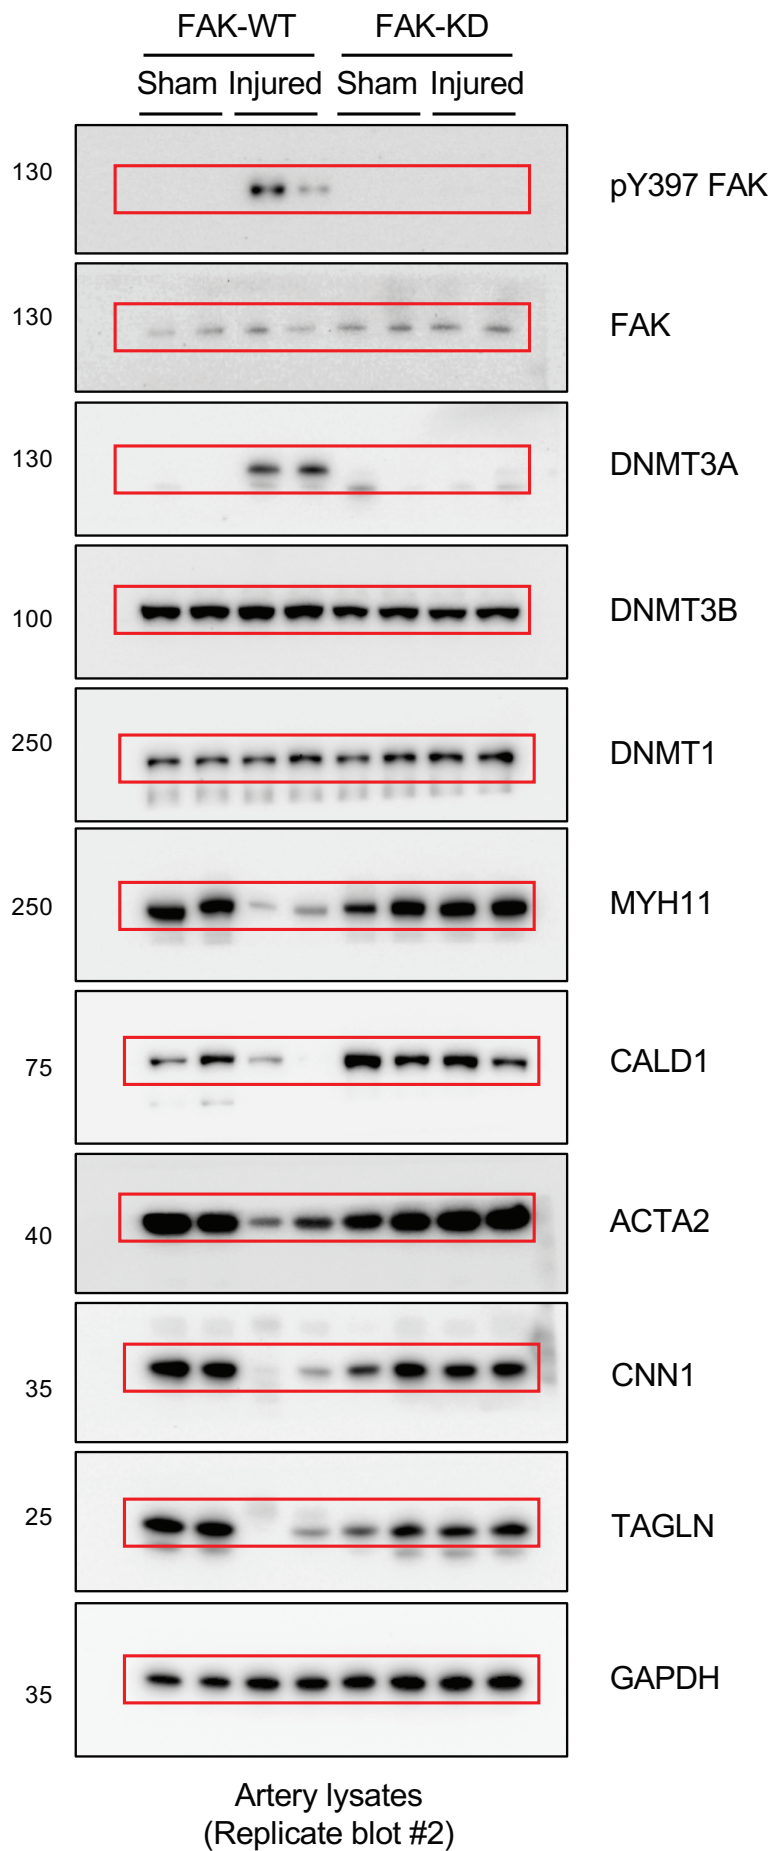

Artery lysates  
(Replicate blot #2)
