# Supplementary material
Source: PubMed Central journal article supplement (PMC8639767)
Supplement: NIHMS1752098-supplement-Supplemental_table_II.pdf [file NIHMS1752098-supplement-Supplemental_table_II.pdf]

**Supplemental table II. Differentially expressed genes between Injured and FAK-I+Injured with p-value adjusted significance** Differentially expressed genes with greater than 2-fold difference were analyzed

| ID                  | Fold Change | log2FoldChange | pvalue    | padj      | Injured-1  | Injured-2  | Injured-3  | FAK-I+Injured-1 | FAK-I+Injured-2 | FAK-I+Injured-3 | Gene.name    |
|---------------------|-------------|----------------|-----------|-----------|------------|------------|------------|-----------------|-----------------|-----------------|--------------|
| ENSMUSG00000065037  | 1398.974134 | 10.45015357    | 1.46E-252 | 2.45E-248 | 16.1389447 | 15.7178481 | 13.6654426 | 19041.936       | 16936.09428     | 28109.30029     | Rn7sk        |
| ENSMUSG00000040998  | 14.22620582 | 3.830479037    | 2.03E-244 | 1.70E-240 | 1510.78454 | 1271.18097 | 1498.22943 | 21452.72731     | 19745.53063     | 19681.2584      | Npnt         |
| ENSMUSG00000042793  | 119.851569  | 6.905104986    | 4.20E-224 | 2.35E-220 | 46.6236179 | 26.5238687 | 55.9040832 | 4853.789675     | 4925.610279     | 5517.795503     | Lgr6         |
| ENSMUSG00000086843  | 14.71860474 | 3.879569012    | 8.97E-195 | 3.76E-191 | 371.195727 | 381.157817 | 355.301506 | 6101.33866      | 5213.831253     | 4998.461936     | E03001319Rik |
| ENSMUSG00000006219  | 7.06704404  | 2.8211069      | 2.22E-174 | 7.44E-171 | 4088.53265 | 3478.55626 | 3796.5084  | 26552.80608     | 26478.02788     | 27282.32341     | Fblm1        |
| ENSMUSG00000092837  | 312.8806292 | 8.289468532    | 1.72E-165 | 4.80E-162 | 12.5525125 | 7.85892406 | 12.4231296 | 3091.87539      | 3197.241975     | 3939.021458     | Rpph1        |
| ENSMUSG00000026255  | 5.641115794 | 2.495980551    | 8.86E-151 | 2.12E-147 | 749.564319 | 811.433909 | 762.780157 | 4225.752486     | 4464.073701     | 4419.775961     | Efhf1        |
| ENSMUSG00000047648  | 5.915531252 | 2.564507738    | 2.66E-146 | 5.58E-143 | 624.039194 | 593.348767 | 664.637433 | 3635.605927     | 3719.103873     | 3766.899476     | Fbxo30       |
| ENSMUSG00000054889  | 592.6509585 | 9.21103887     | 7.07E-131 | 1.32E-127 | 5.37964822 | 1.96473102 | 11.1808166 | 3617.607878     | 3122.553483     | 3594.777494     | Cbp          |
| ENSMUSG00000025270  | 467.5059784 | 8.868841004    | 4.14E-130 | 6.96E-127 | 98.6268841 | 66.8008545 | 163.985311 | 45100.26936     | 75991.71021     | 32280.78535     | Alas2        |
| ENSMUSG00000017969  | 5.655207591 | 2.499579984    | 7.73E-125 | 1.18E-121 | 2305.17926 | 2204.4282  | 2483.38361 | 13376.33958     | 13904.50755     | 12253.30457     | Ptgis        |
| ENSMUSG00000038677  | 6.646657217 | 2.732628953    | 6.67E-124 | 9.32E-121 | 1424.71017 | 1190.627   | 1264.67459 | 8701.583129     | 8109.446627     | 8987.932943     | Scube3       |
| ENSMUSG00000025889  | 113.2035435 | 6.822775308    | 7.23E-116 | 9.34E-113 | 34.9677134 | 49.1182754 | 50.9348313 | 3736.016096     | 7238.08089      | 4230.837463     | Snca         |
| ENSMUSG00000015932  | 3.188541027 | 1.672896444    | 2.94E-113 | 3.53E-110 | 15548.08   | 14932.9381 | 15592.27   | 49965.42622     | 48874.04242     | 48064.56897     | Dstn         |
| ENSMUSG00000020155  | 4.923201766 | 2.299596866    | 6.23E-113 | 6.97E-110 | 844.604771 | 811.433909 | 757.810905 | 3904.629399     | 3845.499782     | 4145.765678     | Cnmb1        |
| ENSMUSG00000073418  | 0.180477068 | -2.470112559   | 9.39E-113 | 9.85E-110 | 10038.4236 | 9636.02326 | 9688.79877 | 1780.8596       | 1924.664981     | 1593.612147     | C4b          |
| ENSMUSG00000068748  | 13.72468345 | 3.77870097     | 2.77E-108 | 2.74E-105 | 166.769095 | 179.772887 | 135.412113 | 2255.439738     | 1928.49516      | 2455.211266     | Ptpcr2       |
| ENSMUSG00000025150  | 4.378189237 | 2.130334313    | 3.67E-107 | 3.42E-104 | 1043.65176 | 1173.92678 | 1121.8086  | 4832.949828     | 4792.511556     | 4990.548281     | Cbr1         |
| ENSMUSG00000023336  | 4.165011664 | 2.058320536    | 1.38E-101 | 1.22E-98  | 986.268841 | 1105.1612  | 1064.66221 | 4340.371641     | 4342.465516     | 4457.365819     | Wfrd1        |
| ENSMUSG00000031586  | 4.109236913 | 2.03887051     | 3.82E-101 | 3.20E-98  | 2490.77713 | 2397.9542  | 2418.78333 | 10534.54234     | 10191.14895     | 9304.479115     | Rbpms        |
| ENSMUSG00000080808  | 425.1482688 | 7.731822253    | 2.78E-100 | 2.22E-97  | 5.37964822 | 3.92946203 | 8.69619071 | 2855.058954     | 1868.198399     | 2695.588517     | Rmrp         |
| ENSMUSG00000032085  | 2.87245026  | 1.522281911    | 3.19E-99  | 2.43E-96  | 14698.0956 | 15169.6882 | 14808.3705 | 42087.96429     | 43698.51296     | 42543.80584     | Tagln        |
| ENSMUSG00000015143  | 3.267573678 | 1.708219767    | 1.18E-98  | 8.58E-96  | 9721.92095 | 9491.61553 | 9094.97317 | 31669.93563     | 31025.40798     | 29812.71439     | Actn1        |
| ENSMUSG00000049313  | 4.640830403 | 2.214382976    | 6.51E-98  | 4.55E-95  | 1583.40979 | 1484.35428 | 1428.6599  | 7444.561486     | 6537.158121     | 6894.771362     | Sor1         |
| ENSMUSG00000035783  | 3.657573696 | 1.870886933    | 1.36E-95  | 9.14E-93  | 74409.501  | 74880.8108 | 66678.6635 | 260200.6383     | 262708.1519     | 267027.4715     | Acta2        |
| ENSMUSG00000041696  | 3.672636268 | 1.876816021    | 1.73E-95  | 1.12E-92  | 2460.29245 | 2302.66475 | 2472.20279 | 8452.452238     | 9165.618504     | 8951.332289     | Ras12        |
| ENSMUSG00000029860  | 4.283752248 | 2.098875044    | 9.74E-93  | 6.06E-90  | 3737.0623  | 3667.17044 | 3862.35099 | 14908.06829     | 17477.10708     | 15873.80144     | Zyx          |
| ENSMUSG00000001349  | 0.487771507 | 2.031314557    | 2.47E-91  | 1.48E-88  | 6864.43113 | 7373.28798 | 6863.61895 | 28398.07975     | 28393.11741     | 26959.84199     | Cnn1         |
| ENSMUSG00000024395  | 3.713937647 | 1.892949594    | 2.95E-91  | 1.71E-88  | 1787.83643 | 1683.77448 | 1705.69569 | 6670.645373     | 6499.813875     | 6060.870034     | Lims2        |
| ENSMUSG00000024672  | 0.029815317 | -5.067802494   | 1.22E-89  | 6.81E-87  | 664.386555 | 825.187026 | 805.018798 | 29.36523808     | 21.06598486     | 17.80572231     | Ms4a7        |
| ENSMUSG00000027931  | 3.539838305 | 1.823498214    | 1.01E-84  | 5.49E-82  | 2012.88504 | 2209.34003 | 2017.51625 | 7263.633729     | 7184.458383     | 7639.644079     | Npr1         |
| ENSMUSG00000030409  | 3.783853231 | 1.91985613     | 5.09E-83  | 2.67E-80  | 4949.27636 | 5698.70231 | 5159.32572 | 19415.1587      | 20726.05647     | 19671.36633     | Dmpk         |
| ENSMUSG00000039601  | 4.777797547 | 2.256345723    | 1.65E-82  | 8.40E-80  | 1663.20791 | 1450.95385 | 1720.60345 | 8170.167046     | 7202.651733     | 7719.769829     | Rcan2        |
| ENSMUSG00000006526  | 5.255997798 | 2.393964671    | 5.09E-82  | 2.51E-79  | 802.464193 | 794.733696 | 964.034856 | 4563.926357     | 4227.560144     | 4653.228764     | Tmem110      |
| ENSMUSG00000029651  | 4.858555975 | 2.28052759     | 1.62E-81  | 7.78E-79  | 456.373491 | 440.099747 | 483.259741 | 2049.883071     | 2312.470611     | 2335.517243     | Tmtus2       |
| ENSMUSG00000029372  | 160.7554761 | 7.328724074    | 8.05E-81  | 3.76E-78  | 60.9693465 | 61.889027  | 116.777418 | 6622.33482      | 19438.15876     | 12264.18585     | Pbpb         |
| ENSMUSG00000010311  | 9.952341951 | 3.315036056    | 4.23E-79  | 1.92E-76  | 155.11319  | 123.778054 | 188.83157  | 1486.259953     | 1522.496179     | 1625.266764     | Optc         |
| ENSMUSG00000021319  | 0.163724491 | -2.610657951   | 4.37E-79  | 1.93E-76  | 14413.8708 | 11149.8485 | 12501.3953 | 1964.629154     | 2265.550917     | 2002.154553     | Sfrp4        |
| ENSMUSG00000032135  | 3.051061094 | 1.609311069    | 5.46E-78  | 2.35E-75  | 8062.29947 | 7637.89182 | 7397.97367 | 24007.50303     | 23895.52965     | 22578.6451      | Mcam         |
| ENSMUSG00000073557  | 3.258383569 | 1.704156444    | 9.87E-77  | 4.14E-74  | 7583.51078 | 6920.765   | 6734.57855 | 22507.03409     | 23606.35113     | 23100.94629     | Ppp1r12b     |
| ENSMUSG00000037852  | 2.990907295 | 1.580583194    | 4.20E-76  | 1.72E-73  | 11873.7802 | 11939.6704 | 12066.5858 | 36488.67648     | 33581.09496     | 37242.64663     | Cpe          |
| ENSMUSG00000031710  | 54.18721589 | 5.759880619    | 5.74E-75  | 2.29E-72  | 34.9677134 | 25.5415032 | 19.8770073 | 1944.736573     | 1430.571881     | 1034.710308     | Ucp1         |
| ENSMUSG00000044468  | 49.71326505 | 5.635558954    | 2.43E-74  | 9.50E-72  | 391.871712 | 343.827928 | 367.74636  | 26510.17912     | 18458.59046     | 9887.121917     | Fat46c       |
| ENSMUSG00000022840  | 5.154717371 | 2.365893328    | 1.95E-73  | 7.42E-71  | 4061.63441 | 3332.1838  | 3781.60065 | 20138.86973     | 20332.50557     | 17136.02931     | Adcy5        |
| ENSMUSG00000022995  | 3.784730512 | 1.920190578    | 2.49E-73  | 9.30E-71  | 3373.93604 | 3379.33735 | 3873.53181 | 13290.13839     | 14062.50244     | 12853.7531      | Enah         |
| ENSMUSG00000031273  | 12.47228278 | 3.640653638    | 1.29E-72  | 4.69E-70  | 420.509169 | 350.630204 | 305.608988 | 4423.731027     | 3849.329961     | 3924.183356     | Col4a6       |
| ENSMUSG00000037736  | 5.572013313 | 2.478198705    | 2.52E-72  | 8.99E-70  | 809.637057 | 1076.6726  | 896.949957 | 5300.899106     | 5031.897748     | 5174.540745     | Limch1       |
| ENSMUSG00000026691  | 45.53390273 | 5.508869214    | 7.17E-72  | 2.51E-69  | 30.4846733 | 18.6649446 | 32.3001369 | 1179.345852     | 1607.717663     | 903.145804      | Fmo3         |
| ENSMUSG00000067818  | 3.441104498 | 2.348717104    | 3.53E-71  | 1.21E-68  | 23942.1244 | 26348.0253 | 28052.6689 | 87121.92505     | 91390.94514     | 91060.44232     | Myl9         |
| ENSMUSG00000031292  | 8.74871458  | 3.129071062    | 4.37E-71  | 1.47E-68  | 185.597864 | 157.178481 | 190.073883 | 1571.51387      | 1769.542728     | 1315.645038     | Cdkl5        |
| ENSMUSG00000020439  | 3.692019819 | 1.884410298    | 5.37E-71  | 1.77E-68  | 10178.2944 | 8514.16185 | 9285.04706 | 35568.88144     | 33817.60852     | 33910.99814     | Smtn         |
| ENSMUSG00000001507  | 2.816943543 | 1.494130649    | 5.69E-71  | 1.84E-68  | 1593.27248 | 1649.39169 | 1643.58005 | 4544.033776     | 4713.03534      | 4504.847745     | Itg3a        |
| ENSMUSG00000029381  | 5.765979785 | 2.527565779    | 1.11E-70  | 3.52E-68  | 152.423366 | 158.160847 | 157.773746 | 841.1719811     | 953.7145874     | 904.1350107     | Shroom3      |
| ENSMUSG00000086596  | 4.271345518 | 2.094690605    | 3.90E-70  | 1.21E-67  | 3798.92825 | 3145.53436 | 3121.93247 | 14509.26941     | 13908.33773     | 14591.78943     | Susd5        |
| ENSMUSG00000023367  | 0.27921419  | -1.840555834   | 1.03E-68  | 3.15E-66  | 2078.33743 | 2199.51637 | 2115.65897 | 565.5176494     | 629.1069116     | 590.5564567     | Tmem176a     |
| ENSMUSG00000111521  | 3.222163167 | 1.688029553    | 1.89E-68  | 5.67E-66  | 1410.36444 | 1271.18097 | 1423.69065 | 4471.094314     | 4350.125874     | 4402.959445     | Gm48529      |
| ENSMUSG00000002980  | 2.942872942 | 1.557225256    | 2.86E-68  | 8.43E-66  | 7721.58842 | 8655.62249 | 8314.80064 | 24786.15547     | 23737.53476     | 24137.63501     | Bcam         |
| ENSMUSG00000032289  | 9.400788266 | 3.232781733    | 2.98E-68  | 8.63E-66  | 1104.9603  | 779.015847 | 636.064235 | 8154.063528     | 7194.991375     | 7523.906884     | Thsd4        |
| ENSMUSG00000025348  | 2.866391562 | 1.519235702    | 1.08E-67  | 3.07E-65  | 1993.15967 | 1897.93016 | 1833.65393 | 5363.418645     | 5576.74072      | 5476.248818     | Igta7        |
| ENSMUSG00000026712  | 0.126238032 | -2.985781479   | 3.41E-67  | 9.55E-65  | 2745.41381 | 2404.83076 | 2780.2964  | 300.283241      | 409.82916       | 290.8267978     | Lmc1         |
| ENSMUSG00000048096  | 3.982696003 | 1.993745364    | 9.62E-67  | 2.65E-64  | 5884.43855 | 5055.2529  | 6191.68779 | 23718.58698     | 22437.18897     | 22065.24677     | Lmod1        |
| ENSMUSG00000027335  | 11.55438318 | 3.53036834     | 1.27E-66  | 3.45E-64  | 73.521859  | 63.853758  | 75.7810905 | 706.6602454     | 791.8895218     | 960.5197981     | Adra1d       |
| ENSMUSG00000049103  | 0.062410638 | -4.002064219   | 1.99E-66  | 5.31E-64  | 1862.25489 | 2877.34857 | 2600.16102 | 125.0390783     | 191.5089533     | 141.4565717     | Ccr2         |
| ENSMUSG00000029108  | 4.423770586 | 2.14527657     | 1.01E-65  | 2.65E-63  | 2248.69296 | 1806.57017 | 1868.43869 | 9018.917153     | 8323.936655     | 8872.195746     | Pcdh7        |
| ENSMUSG00000023092  | 3.851324336 | 1.945354623    | 1.03E-65  | 2.65E-63  | 8749.10123 | 8850.13086 | 7637.74007 | 29818.97837     | 33279.46836     | 34108.8395      | Fhl1         |
| ENSMUSG00000015852  | 0.113545081 | -3.138662884   | 5.76E-65  | 1.47E-62  | 1052.61784 | 968.61239  | 1100.68928 | 114.6191551     | 143.631715      | 95.95305913     | Fcrls        |
| ENSMUSG000000051048 | 0.073294864 | -3.770144072   | 1.93E-64  |           |            |            |            |                 |                 |                 |              |

|                     |             |              |          |          |            |            |            |             |             |             |          |
|---------------------|-------------|--------------|----------|----------|------------|------------|------------|-------------|-------------|-------------|----------|
| ENSMUSG00000006221  | 4.862326691 | 2.281646829  | 5.31E-56 | 1.10E-53 | 2282.76406 | 2777.14729 | 2566.61857 | 12281.30038 | 13998.34694 | 10799.17058 | Hspb7    |
| ENSMUSG000000091694 | 285.3952992 | 8.156817762  | 9.33E-56 | 1.91E-53 | 4.48304019 | 4.91182754 | 11.1808166 | 1235.234531 | 3210.647602 | 1226.616426 | Apol11b  |
| ENSMUSG000000030376 | 4.079502424 | 2.028393198  | 1.04E-55 | 2.11E-53 | 192.770728 | 205.314391 | 201.254699 | 822.2266662 | 808.1677829 | 813.1279856 | Slc8a2   |
| ENSMUSG000000021779 | 4.593171587 | 2.199490679  | 2.68E-55 | 5.35E-53 | 588.174872 | 449.923402 | 505.621374 | 2241.230751 | 2435.036341 | 2419.599821 | Thrb     |
| ENSMUSG000000057604 | 6.205064182 | 2.633446133  | 2.68E-54 | 5.29E-52 | 1120.76005 | 1002.01282 | 849.742064 | 6689.590687 | 5097.010792 | 6672.199833 | Lmcd1    |
| ENSMUSG000000050503 | 4.197872205 | 2.069658248  | 4.74E-53 | 9.26E-51 | 363.212058 | 676.849835 | 587.61403  | 2963.994514 | 2404.394909 | 2594.689424 | Fbxl22   |
| ENSMUSG000000025969 | 0.290326015 | -1.784254241 | 5.62E-53 | 1.08E-50 | 2526.64145 | 2472.61398 | 2258.52496 | 760.6543928 | 669.3237917 | 677.6066547 | Nrnp2    |
| ENSMUSG000000016255 | 211.0866223 | 7.72169134   | 1.52E-52 | 2.86E-50 | 7.1728643  | 4.91182754 | 3.72693888 | 1291.12321  | 1527.283902 | 595.5024907 | Tubb1    |
| ENSMUSG000000032911 | 2.930620585 | 1.551206201  | 1.51E-52 | 2.86E-50 | 4251.71531 | 4006.08654 | 4658.6736  | 13014.48406 | 12689.38324 | 12140.535   | Cspg4    |
| ENSMUSG000000059970 | 3.434585331 | 1.780135928  | 1.58E-52 | 2.95E-50 | 376.575376 | 363.475238 | 342.878377 | 1256.074377 | 1277.364718 | 1191.004981 | Hspa2    |
| ENSMUSG000000055322 | 3.253369544 | 1.701934705  | 6.06E-52 | 1.12E-49 | 19078.9224 | 15812.1552 | 18775.0758 | 57389.14786 | 59955.70801 | 57248.36485 | Tns1     |
| ENSMUSG000000037995 | 6.993046594 | 2.805921118  | 1.12E-51 | 2.05E-49 | 122.835301 | 135.56644  | 122.988983 | 902.7442545 | 745.9273731 | 1019.872206 | Igcam1   |
| ENSMUSG000000039542 | 6.516713876 | 2.704144653  | 7.19E-51 | 1.30E-48 | 771.97952  | 793.75133  | 1146.65486 | 5556.660857 | 5865.919239 | 6231.013603 | Ncam1    |
| ENSMUSG000000050295 | 2.438025119 | 1.28571299   | 9.32E-51 | 1.66E-48 | 1289.32236 | 1266.26914 | 1236.10139 | 3039.775774 | 3095.744223 | 3112.044577 | Foxc1    |
| ENSMUSG000000026656 | 0.123711825 | -3.014944688 | 2.76E-50 | 4.87E-48 | 1469.54057 | 2046.26735 | 1812.53461 | 264.2871427 | 213.5324829 | 181.0248435 | Fcgr2b   |
| ENSMUSG000000026768 | 9.545768409 | 3.254861335  | 3.31E-50 | 5.79E-48 | 6347.08829 | 4484.49854 | 3536.86499 | 50373.69776 | 41557.44286 | 45253.24326 | Itga8    |
| ENSMUSG000000045312 | 0.20493874  | -2.286347798 | 6.27E-50 | 1.08E-47 | 962.060424 | 874.305302 | 1067.14683 | 214.0820582 | 183.8485952 | 196.8521522 | Liflpl2  |
| ENSMUSG000000039115 | 4.551380353 | 2.186304156  | 2.27E-49 | 3.89E-47 | 3295.03454 | 2817.42428 | 2448.59884 | 12200.78279 | 12517.98273 | 14260.40516 | Itga9    |
| ENSMUSG000000045392 | 5.932201626 | 2.568567634  | 2.63E-49 | 4.46E-47 | 752.254143 | 561.91307  | 734.206959 | 4436.992747 | 4294.588277 | 3416.72027  | Ofir1033 |
| ENSMUSG000000021822 | 0.201895455 | -2.308319662 | 3.95E-49 | 6.63E-47 | 1155.72776 | 1359.59386 | 1431.14453 | 234.9219046 | 276.7304375 | 284.891557  | Plau     |
| ENSMUSG000000031028 | 9.380007077 | 3.229589011  | 7.56E-49 | 1.26E-46 | 196.35716  | 132.619344 | 178.893066 | 1265.547035 | 1626.868558 | 1871.579256 | Tub      |
| ENSMUSG000000022246 | 0.270194114 | -1.887931846 | 8.31E-49 | 1.36E-46 | 1080.41268 | 991.206797 | 1039.81595 | 268.0762057 | 302.5841462 | 270.0534551 | Rai14    |
| ENSMUSG000000029816 | 0.165257862 | -2.597209189 | 8.33E-49 | 1.36E-46 | 3237.65162 | 3787.01903 | 2595.19177 | 476.4746695 | 571.6542256 | 542.0853237 | GpnmB    |
| ENSMUSG000000026676 | 4.108649541 | 2.038664277  | 9.66E-49 | 1.55E-46 | 1808.45841 | 1482.38955 | 1390.1482  | 6760.635618 | 6004.76323  | 6479.304508 | Ccdc3    |
| ENSMUSG000000027078 | 34.53185219 | 5.109855813  | 9.72E-49 | 1.55E-46 | 711.010173 | 1378.25881 | 1489.53324 | 25746.68293 | 61088.48346 | 36708.47496 | Ube2l6   |
| ENSMUSG000000044345 | 2.456391092 | 1.296540276  | 3.27E-48 | 5.18E-46 | 5385.02787 | 5343.086   | 5761.8475  | 14100.99787 | 13419.03236 | 12979.38236 | Marveld1 |
| ENSMUSG000000028583 | 0.192227515 | -2.379113242 | 3.70E-48 | 5.80E-46 | 1055.30766 | 1282.96935 | 1407.54058 | 228.2910444 | 249.919184  | 241.366458  | Pdgn     |
| ENSMUSG000000045915 | 33.44201446 | 5.063589849  | 6.74E-48 | 1.05E-45 | 7.1728643  | 11.7883861 | 12.4231296 | 319.2285559 | 309.2869596 | 402.6071656 | Ccdc42   |
| ENSMUSG000000026991 | 3.791387734 | 1.923276004  | 8.09E-48 | 1.25E-45 | 1942.05301 | 2022.69058 | 2433.81408 | 7708.848628 | 7687.169385 | 8775.25348  | Pkp4     |
| ENSMUSG000000027536 | 4.126666202 | 2.044976746  | 1.09E-47 | 1.67E-45 | 494.031028 | 451.888133 | 385.117017 | 1964.629154 | 1783.9059   | 1755.842061 | Chmp4c   |
| ENSMUSG000000097971 | 43.71388151 | 5.450019581  | 1.23E-47 | 1.86E-45 | 739.701631 | 1380.22354 | 2006.33543 | 64017.16628 | 34801.96454 | 81487.88816 | Gm26917  |
| ENSMUSG000000018008 | 0.10933624  | -3.193156425 | 1.50E-47 | 2.25E-45 | 1199.66155 | 1954.90736 | 1807.56536 | 198.9258063 | 176.188237  | 167.1759484 | Cyth4    |
| ENSMUSG000000029922 | 9.302280735 | 3.21758448   | 1.11E-46 | 1.64E-44 | 1132.41595 | 1300.65193 | 1300.70167 | 8266.788152 | 15269.00885 | 11191.88568 | Mkrrn1   |
| ENSMUSG000000029552 | 2.961534862 | 1.566345069  | 1.60E-46 | 2.35E-44 | 744.184671 | 664.079083 | 704.391448 | 2096.299092 | 1986.90539  | 2175.265742 | Tes      |
| ENSMUSG000000023572 | 6.639395588 | 2.731051913  | 1.99E-46 | 2.91E-44 | 760.323615 | 772.139289 | 745.387776 | 4363.106019 | 6494.068606 | 4267.438114 | Cndbpb1  |
| ENSMUSG000000022836 | 2.47281029  | 1.306151563  | 3.67E-46 | 5.32E-44 | 18155.4161 | 16262.0786 | 18293.0583 | 42803.14993 | 43256.12728 | 44280.85298 | Mykl     |
| ENSMUSG000000039323 | 0.15886459  | -2.654130503 | 3.83E-46 | 5.50E-44 | 2300.69622 | 3411.75541 | 3043.66675 | 473.6328722 | 506.5411814 | 410.52082   | Igfbp2   |
| ENSMUSG000000042109 | 5.704473602 | 2.512093627  | 9.28E-46 | 1.31E-43 | 145.250502 | 103.148378 | 129.200548 | 691.5039935 | 744.0122845 | 720.1422845 | Csdc2    |
| ENSMUSG000000053158 | 0.244577492 | -2.031636455 | 9.21E-46 | 1.31E-43 | 894.814821 | 1062.91948 | 1059.69295 | 254.8144853 | 240.3437364 | 242.3556648 | Fes      |
| ENSMUSG000000019851 | 3.000962041 | 1.58542507   | 1.16E-45 | 1.62E-43 | 665.283163 | 755.439075 | 677.060563 | 2098.193624 | 2183.202067 | 2015.014242 | Perp     |
| ENSMUSG000000037166 | 3.174554801 | 1.666554283  | 1.81E-45 | 2.52E-43 | 1910.67173 | 2330.17098 | 2200.13625 | 6478.350426 | 6897.194953 | 7066.893344 | Ppp1r14a |
| ENSMUSG000000002985 | 0.231039177 | -2.113790585 | 2.09E-45 | 2.88E-43 | 39108.2494 | 36527.2967 | 46590.4629 | 10121.53448 | 9985.276824 | 8131.279856 | Apoe     |
| ENSMUSG000000037242 | 2.385658312 | 1.254387426  | 2.14E-45 | 2.91E-43 | 8410.18339 | 8352.07155 | 8188.08471 | 20939.30928 | 19944.69994 | 18640.61285 | Clic4    |
| ENSMUSG000000021136 | 4.42000932  | 2.144049412  | 2.43E-45 | 3.29E-43 | 1540.7118  | 1159.1913  | 1596.37215 | 5940.303484 | 6677.917201 | 5964.916975 | Smoc1    |
| ENSMUSG000000024371 | 0.251587475 | -1.990867995 | 3.16E-45 | 4.25E-43 | 1650.6554  | 1352.7173  | 1370.27119 | 384.5898923 | 359.0792874 | 357.103653  | C2c      |
| ENSMUSG000000030208 | 0.325901209 | -1.617493391 | 5.16E-45 | 6.87E-43 | 8689.02849 | 7426.68324 | 7923.47205 | 2424.05304  | 2787.412151 | 2623.376421 | Empl1    |
| ENSMUSG000000029859 | 5.389097285 | 2.400343631  | 6.85E-45 | 9.05E-43 | 121.938693 | 99.2819613 | 130.442861 | 607.1973422 | 611.8711085 | 670.6822071 | Epha1    |
| ENSMUSG000000030533 | 2.57895241  | 1.366785151  | 8.24E-45 | 1.08E-42 | 1231.04283 | 1222.06269 | 1356.60575 | 3285.117602 | 3202.029699 | 3330.659279 | Unc45a   |
| ENSMUSG000000020186 | 3.725329017 | 1.897367848  | 1.33E-44 | 1.73E-42 | 4309.09823 | 3967.77429 | 5129.51021 | 16301.4962  | 17892.68151 | 15737.2909  | Csrp2    |
| ENSMUSG000000033306 | 2.557461208 | 1.354712357  | 1.68E-44 | 2.16E-42 | 6971.12749 | 6240.96807 | 6689.85529 | 17955.42219 | 16360.60988 | 16583.06271 | Lpp      |
| ENSMUSG000000016024 | 0.322551804 | -2.104375966 | 7.57E-44 | 9.70E-42 | 2989.2912  | 2830.19503 | 2385.24088 | 592.0410903 | 721.9887539 | 594.5132839 | Lbp      |
| ENSMUSG000000031819 | 2.8040339   | 1.487503791  | 8.37E-44 | 1.06E-41 | 815.913314 | 891.005515 | 947.884788 | 2445.840152 | 2459.932505 | 2530.390982 | Emc8     |
| ENSMUSG000000038319 | 2.947636216 | 1.559558485  | 1.03E-43 | 1.30E-41 | 994.338313 | 850.72853  | 919.31159  | 2810.537464 | 2589.201048 | 2750.984097 | Kcnh2    |
| ENSMUSG000000000320 | 0.210638232 | 5.000738395  | 1.21E-43 | 1.52E-41 | 54.6930903 | 43.2240823 | 67.0848998 | 1530.781443 | 2719.427137 | 1014.926172 | Allox12  |
| ENSMUSG000000023829 | 31.66301011 | 4.98472651   | 1.78E-43 | 2.21E-41 | 8.06947233 | 7.85892406 | 16.1500685 | 347.6465282 | 363.8670112 | 271.0426619 | Slc22a1  |
| ENSMUSG000000063873 | 5.99220928  | 2.583088011  | 3.37E-43 | 4.15E-41 | 355.056783 | 255.415032 | 406.236338 | 2138.926051 | 1979.245032 | 1963.575488 | Slc24a3  |
| ENSMUSG000000078794 | 2.82190734  | 1.46670617   | 4.48E-43 | 5.48E-41 | 122.92914  | 1151.33237 | 1249.76684 | 3436.680121 | 3272.888012 | 3699.633414 | Dact3    |
| ENSMUSG000000038370 | 2.852122872 | 1.512036136  | 1.63E-42 | 1.98E-40 | 2228.96758 | 2631.75719 | 2633.70347 | 7122.491133 | 6951.775004 | 7293.4217   | Pcp4l1   |
| ENSMUSG000000027254 | 3.820987093 | 1.933945384  | 2.64E-42 | 3.19E-40 | 1232.83605 | 1058.00765 | 1101.93159 | 3814.639153 | 4245.753494 | 4907.454911 | Map1a    |
| ENSMUSG000000024526 | 16.66287509 | 4.058565446  | 3.25E-42 | 3.90E-40 | 102.123316 | 40.2769858 | 83.2349683 | 1414.267756 | 1205.548861 | 1142.538848 | Cidea    |
| ENSMUSG000000036905 | 0.090937405 | -3.458982361 | 3.42E-42 | 4.07E-40 | 3621.39986 | 5812.65671 | 5769.30138 | 490.6836556 | 560.1636884 | 331.3842764 | C1qb     |
| ENSMUSG000000028459 | 0.050421274 | -4.309823624 | 9.91E-42 | 1.17E-39 | 459.959923 | 927.353039 | 662.152807 | 34.1015668  | 28.72634299 | 40.5574786  | Cd72     |
| ENSMUSG000000036098 | 9.000167124 | 3.169951791  | 1.23E-41 | 1.44E-39 | 45.7270099 | 49.1182754 | 43.4809536 | 343.8574652 | 432.8102344 | 470.8624345 | Myrf     |
| ENSMUSG000000085069 | 4.167266681 | 2.059101427  | 1.30E-41 | 1.51E-39 | 272.568843 | 213.173315 | 219.889394 | 1002.207158 | 942.2240502 | 1003.05569  | Gm13111  |
| ENSMUSG000000032702 | 3.475075424 | 1.797044291  | 1.34E-41 | 1.56E-39 | 3114.81632 | 2856.7189  | 2421.26796 | 10420.87045 | 9234.561728 | 9522.10461  | Kank1    |
| ENSMUSG000000027858 | 3.236267437 | 1.694330833  | 1.55E-41 | 1.78E-39 | 2229.86419 | 1880.24758 | 1749.17665 | 6292.68634  | 6405.974488 | 6274.538702 | Tspan2   |
| ENSMUSG000000001870 | 3.275834236 | 1.711862355  | 1.63E-41 | 1.85E-39 | 4842.58001 | 3946.16224 | 3813.90078 | 13983.53692 | 13733.10704 | 13577.85247 | Ltbp1    |
| ENSMUSG000000029919 | 0           |              |          |          |            |            |            |             |             |             |          |

|                     |             |              |          |          |             |            |            |             |             |             |               |
|---------------------|-------------|--------------|----------|----------|-------------|------------|------------|-------------|-------------|-------------|---------------|
| ENSMUSG00000039236  | 24.20358507 | 4.597148852  | 8.69E-40 | 8.79E-38 | 237.60113   | 275.062342 | 290.701232 | 3083.349998 | 9638.645619 | 6713.746519 | Isg20         |
| ENSMUSG00000038642  | 0.058829842 | -4.087308025 | 8.75E-40 | 8.79E-38 | 4125.29358  | 8586.8569  | 5851.29404 | 408.2715359 | 446.2158612 | 237.4096308 | Ctss          |
| ENSMUSG000000021870 | 3.376128483 | 1.755369809  | 8.82E-40 | 8.81E-38 | 4603.18566  | 4025.73385 | 3456.11465 | 13671.88649 | 13648.8431  | 13492.78069 | Slmap         |
| ENSMUSG000000037419 | 2.558767711 | 1.355449183  | 9.03E-40 | 8.97E-38 | 1840.7363   | 1775.13447 | 1852.28862 | 4699.385358 | 4309.908994 | 4981.64542  | Endod1        |
| ENSMUSG000000060586 | 0.090212488 | -3.470529024 | 1.03E-39 | 1.02E-37 | 7072.4442   | 15463.4155 | 9827.93782 | 979.4727798 | 947.9693188 | 992.1744155 | H2-Eb1        |
| ENSMUSG00000071547  | 0.128443615 | -2.960792919 | 1.17E-39 | 1.15E-37 | 442.92437   | 389.999107 | 488.228993 | 53.04688169 | 68.94322318 | 47.48192617 | Nt5dc2        |
| ENSMUSG00000002358  | 2.826114334 | 1.498819833  | 1.56E-39 | 1.53E-37 | 1323.39346  | 1425.41235 | 1432.38684 | 4315.742732 | 3834.009245 | 3663.032762 | Fbxo32        |
| ENSMUSG000000024810 | 0.210170504 | -2.250367882 | 2.84E-39 | 2.76E-37 | 2655.75301  | 2249.61701 | 1967.82373 | 519.101628  | 514.2015396 | 411.5100268 | Il13          |
| ENSMUSG000000029810 | 0.330898554 | -1.595539107 | 3.23E-39 | 3.12E-37 | 3369.453    | 3553.21604 | 3418.84526 | 1026.836067 | 1276.407174 | 1118.792885 | Tmem176b      |
| ENSMUSG000000029761 | 2.465586515 | 1.301930876  | 3.95E-39 | 3.79E-37 | 24590.372   | 20952.8739 | 22791.4735 | 56152.0188  | 54979.34785 | 57356.1884  | Cald1         |
| ENSMUSG000000002012 | 3.299910244 | 1.722426784  | 3.99E-39 | 3.81E-37 | 399.887185  | 400.805127 | 411.20559  | 1219.131013 | 1305.133517 | 1473.918125 | Pnck          |
| ENSMUSG000000029126 | 0.325440841 | -1.619532782 | 7.51E-39 | 7.12E-37 | 982.682409  | 908.688094 | 1022.42357 | 313.5449614 | 322.6925863 | 311.6001405 | Nsg1          |
| ENSMUSG000000019907 | 2.808545985 | 1.489823425  | 8.69E-39 | 8.19E-37 | 5039.83378  | 4255.60738 | 4325.73372 | 13512.74584 | 12498.83164 | 12250.33695 | Ppp1r12a      |
| ENSMUSG000000034275 | 4.507849353 | 2.172439303  | 1.08E-38 | 1.01E-36 | 472.656028  | 495.112216 | 472.078925 | 2491.308908 | 2378.5412   | 2533.358602 | Igfb9b        |
| ENSMUSG000000061353 | 0.354439542 | -1.496388534 | 1.40E-38 | 1.31E-36 | 10146.9132  | 10143.9062 | 12189.5748 | 3803.271964 | 3835.924334 | 3871.755396 | Cxcl12        |
| ENSMUSG000000036446 | 0.189962066 | -2.396216744 | 1.59E-38 | 1.48E-36 | 21289.9578  | 13443.672  | 17566.3052 | 3085.24453  | 3570.684434 | 3279.220526 | Lum           |
| ENSMUSG000000031930 | 3.865450628 | 1.950636611  | 1.94E-38 | 1.78E-36 | 3059.22662  | 3283.31847 | 3792.78146 | 11425.91941 | 13518.61701 | 12443.23228 | Wwp2          |
| ENSMUSG000000008855 | 2.343608854 | 1.228731806  | 2.18E-38 | 1.99E-36 | 1806.66519  | 1782.01103 | 1652.27624 | 4011.670428 | 4270.649658 | 4006.28752  | Hdac5         |
| ENSMUSG000000038530 | 2.134251498 | 1.093730192  | 4.03E-38 | 3.68E-36 | 1890.04974  | 1871.40629 | 1883.34645 | 3911.260259 | 3969.980602 | 4166.539021 | Rgs4          |
| ENSMUSG000000018830 | 3.897210941 | 1.962442021  | 1.24E-37 | 1.13E-35 | 65102.7096  | 52894.4884 | 45464.9274 | 216637.7812 | 205987.0302 | 174435.303  | Mylh11        |
| ENSMUSG000000026840 | 10.57059274 | 3.401984372  | 1.40E-37 | 1.26E-35 | 80.6947233  | 41.2593513 | 75.7810905 | 682.9786018 | 613.7861953 | 790.3762293 | Lamc3         |
| ENSMUSG000000043004 | 0.175991501 | -2.506422334 | 1.49E-37 | 1.34E-35 | 605.210425  | 664.079083 | 740.418524 | 116.5136866 | 139.8015359 | 96.94226592 | Gng2          |
| ENSMUSG000000019763 | 3.029664433 | 1.599158009  | 1.54E-37 | 1.37E-35 | 471.615827  | 451.888133 | 426.113345 | 1336.591965 | 1476.53403  | 1280.03593  | Rnmnd1        |
| ENSMUSG000000028111 | 0.239637802 | -2.061072587 | 1.72E-37 | 1.53E-35 | 5832.43528  | 4035.55751 | 4821.41659 | 1148.086082 | 1158.629167 | 1213.756738 | Ctsk          |
| ENSMUSG000000085180 | 4.092938351 | 2.033136937  | 1.82E-37 | 1.61E-35 | 581.002008  | 428.311361 | 453.44423  | 2133.242457 | 1876.787742 | 1984.348831 | Al838599      |
| ENSMUSG000000050135 | 3.25185487  | 1.701262871  | 1.91E-37 | 1.68E-35 | 6127.41933  | 6818.95899 | 5190.38354 | 19759.01616 | 18738.19353 | 20489.44035 | Sympo2        |
| ENSMUSG000000036908 | 0.182247481 | -2.456029218 | 2.28E-37 | 1.99E-35 | 2073.85439  | 3098.38081 | 2795.20416 | 532.3633484 | 499.8383681 | 419.4236811 | Unc93b1       |
| ENSMUSG000000073414 | 64.55359299 | 6.012425492  | 2.55E-37 | 2.22E-35 | 8.96608037  | 6.87655885 | 17.3923814 | 754.0235326 | 987.2286542 | 354.1360327 | Pmpig6b       |
| ENSMUSG00000004792  | 6.356648297 | 2.68266269   | 3.23E-37 | 2.79E-35 | 1325.18668  | 1764.32845 | 1622.46072 | 7806.417    | 12709.49169 | 9432.086792 | Isc1a         |
| ENSMUSG000000027796 | 6.182842706 | 2.628270303  | 3.42E-37 | 2.94E-35 | 69.0388189  | 61.889027  | 52.1771443 | 373.2227033 | 356.2066531 | 410.52082   | Smad9         |
| ENSMUSG000000039062 | 0.342428162 | -1.546126737 | 3.91E-37 | 3.35E-35 | 2940.87436  | 2607.19806 | 2426.23721 | 933.0567583 | 924.0306969 | 874.4588069 | Anpep         |
| ENSMUSG000000026207 | 3.164161816 | 1.661823381  | 9.18E-37 | 7.82E-35 | 2637.82085  | 3099.36318 | 2436.17571 | 8552.862407 | 8128.597522 | 9186.763506 | Speg          |
| ENSMUSG000000022548 | 0.290731999 | -1.782238227 | 1.01E-36 | 8.55E-35 | 2197.5863   | 2169.06304 | 1739.23814 | 579.7266356 | 615.7012848 | 580.6643887 | Apod          |
| ENSMUSG000000020672 | 6.042241005 | 2.59508373   | 1.11E-36 | 9.37E-35 | 81.5913314  | 79.5716061 | 86.9619071 | 424.3750535 | 495.0506443 | 577.6967684 | Sntg2         |
| ENSMUSG000000034248 | 10.82982453 | 3.463879663  | 1.51E-36 | 1.26E-34 | 846.937987  | 949.947446 | 760.295531 | 12764.40591 | 9224.98628  | 5703.766381 | Slc25a37      |
| ENSMUSG000000034780 | 6.52072246  | 2.705031816  | 2.65E-36 | 2.21E-34 | 162.286055  | 115.91913  | 105.596602 | 860.117296  | 726.7764777 | 927.8759738 | B3galt1       |
| ENSMUSG000000027102 | 0.240375377 | -2.056638974 | 2.90E-36 | 2.41E-34 | 648.247611  | 782.94531  | 684.514441 | 152.5097849 | 177.1457818 | 179.0464299 | Hoxd8         |
| ENSMUSG000000047658 | 82.61719636 | 6.368370198  | 5.56E-36 | 4.59E-34 | 4.48304019  | 2.94709652 | 2.48462592 | 296.494178  | 250.8767288 | 293.7944182 | Gal1st3       |
| ENSMUSG000000046805 | 0.076782529 | -3.703078115 | 6.25E-36 | 5.14E-34 | 3889.48566  | 5726.20854 | 5149.38722 | 481.2109982 | 439.5130478 | 212.679461  | Mpeg1         |
| ENSMUSG000000021150 | 0.325994365 | -1.617081069 | 6.39E-36 | 5.23E-34 | 3396.35124  | 2927.44921 | 3723.21194 | 1116.826313 | 1071.492594 | 1086.149061 | Dab2          |
| ENSMUSG000000024867 | 17.34363437 | 4.116334343  | 6.60E-36 | 5.37E-34 | 68.1422108  | 74.6597786 | 78.2657164 | 680.1368045 | 1557.925335 | 1591.633733 | Pip5k1b       |
| ENSMUSG000000043687 | 7.794439257 | 2.962445237  | 7.22E-36 | 5.86E-34 | 48.416834   | 45.1888133 | 75.7810905 | 413.9551303 | 439.5130478 | 451.0782986 | 1190005I06Rik |
| ENSMUSG000000050830 | 23.1101436  | 4.530454319  | 7.49E-36 | 6.05E-34 | 116.1389447 | 38.3122548 | 36.0270758 | 950.1075417 | 599.4230238 | 522.3011878 | Vwc2          |
| ENSMUSG000000068196 | 0.213839524 | -2.225399563 | 8.72E-36 | 7.00E-34 | 1073.1093   | 7859.90463 | 9939.74599 | 1730.654515 | 2146.815366 | 2296.938178 | Col8a1        |
| ENSMUSG000000056737 | 0.357033024 | -1.485870571 | 9.25E-36 | 7.39E-34 | 2098.06281  | 2527.62645 | 2323.12523 | 836.4356524 | 835.9365811 | 808.1819516 | Capg          |
| ENSMUSG000000030878 | 5.300729197 | 2.406190838  | 9.78E-36 | 7.78E-34 | 681.422108  | 638.53758  | 791.353355 | 3314.48284  | 4696.757079 | 3173.375399 | Cdr2          |
| ENSMUSG000000051839 | 1356.02114  | 10.01516395  | 1.59E-35 | 1.26E-33 | 3.58643215  | 1.96473102 | 7.45387776 | 2464.785467 | 1062.964881 | 4480.117575 | Gypa          |
| ENSMUSG000000075289 | 3.069733168 | 1.618113257  | 1.83E-35 | 1.44E-33 | 368.505903  | 438.135016 | 432.32491  | 1204.922027 | 1293.642979 | 1299.817729 | Carns1        |
| ENSMUSG000000042524 | 2.658743183 | 1.410744429  | 1.85E-35 | 1.45E-33 | 3375.72926  | 3644.57603 | 4010.18623 | 10078.90752 | 10131.78117 | 9107.626963 | Sum2          |
| ENSMUSG000000042331 | 4.598243142 | 2.201082754  | 1.89E-35 | 1.48E-33 | 711.906781  | 680.779297 | 792.595668 | 3251.963301 | 4055.202086 | 2736.145995 | Spec1         |
| ENSMUSG000000031880 | 3.546357586 | 1.789252483  | 2.40E-35 | 1.86E-33 | 927.989318  | 892.970246 | 1155.35105 | 3641.289522 | 3461.524331 | 3173.375399 | Rrad          |
| ENSMUSG000000036887 | 0.09635524  | -3.375493067 | 3.04E-35 | 2.35E-33 | 3598.08805  | 6454.14138 | 7133.36101 | 570.2539782 | 652.0879859 | 433.2725763 | C1qa          |
| ENSMUSG000000018774 | 0.122297473 | -3.031533503 | 4.75E-35 | 3.66E-33 | 805.154017  | 1080.60206 | 935.461658 | 146.8261904 | 117.7780063 | 80.12570441 | Cd68          |
| ENSMUSG000000055172 | 0.416034372 | -1.265225369 | 6.16E-35 | 4.72E-33 | 352.77298   | 307.07221  | 3307.0371  | 1332.802902 | 1427.699247 | 1374.008238 | C1ra          |
| ENSMUSG000000025666 | 2.581597699 | 1.368264197  | 6.55E-35 | 5.00E-33 | 1438.15929  | 1221.08033 | 1249.76684 | 3432.891058 | 3296.826631 | 3367.259931 | Tmem47        |
| ENSMUSG000000015342 | 5.362809944 | 2.422989126  | 9.42E-35 | 7.15E-33 | 260.912939  | 219.067508 | 166.469937 | 1083.672012 | 1105.00666  | 1291.904074 | Xk            |
| ENSMUSG000000024678 | 0.317715931 | -1.654190661 | 1.21E-34 | 9.15E-33 | 624.039194  | 644.431773 | 672.091311 | 210.2929953 | 200.1268562 | 205.7550134 | Ms4a4d        |
| ENSMUSG000000020053 | 0.129008859 | -2.95445796  | 1.45E-34 | 1.09E-32 | 10248.2299  | 8175.24575 | 13624.4462 | 1383.007987 | 1703.47214  | 1047.569996 | Igf1          |
| ENSMUSG000000049565 | 10.85975129 | 3.440919158  | 1.85E-34 | 1.39E-32 | 23.311809   | 32.4180617 | 29.815511  | 293.6523808 | 262.367266  | 368.9741346 | Aknad1        |
| ENSMUSG000000078810 | 221.2001443 | 7.789208516  | 1.88E-34 | 1.40E-32 | 0           | 4.91182754 | 2.48462592 | 527.6270197 | 706.6680376 | 356.1144462 | Gp6           |
| ENSMUSG000000020902 | 2.710021422 | 1.438304256  | 2.13E-34 | 1.58E-32 | 2503.32964  | 2274.17615 | 2087.08577 | 6490.664881 | 5772.079852 | 6348.729211 | Ntn1          |
| ENSMUSG000000036896 | 0.106905169 | -3.225596484 | 2.55E-34 | 1.88E-32 | 2699.6868   | 4204.52437 | 4574.19632 | 414.9023961 | 517.0741739 | 294.7836249 | C1qc          |
| ENSMUSG000000028031 | 0.110848877 | -3.173333934 | 2.56E-34 | 1.89E-32 | 714.596606  | 827.151757 | 1270.88616 | 93.7793087  | 116.8204615 | 100.8990931 | Dkk2          |
| ENSMUSG000000059146 | 3.208936952 | 1.682095444  | 2.66E-34 | 1.94E-32 | 2083.71708  | 1699.49233 | 1663.45705 | 5553.81906  | 5576.74072  | 6355.653659 | Ntrk3         |
| ENSMUSG000000074622 | 0.199086996 | -2.328529103 | 2.66E-34 | 1.94E-32 | 1342.22223  | 1529.5431  | 1564.07202 | 325.8594161 | 334.1831235 | 222.5715289 | Maflb         |
| ENSMUSG000000045573 | 0.08837953  | -3.500143925 | 2.99E-34 | 2.17E-32 | 2799.21029  | 1281.00462 | 2356.66768 | 162.929708  | 195.3391324 | 210.7010474 | Penk          |
| ENSMUSG000000030560 | 0.295384894 | -1.759332046 | 3.52E-34 | 2.55E-32 | 3315.65652  | 4160.31792 | 3795.26609 | 1231.445468 | 1099.261392 | 998.1096563 | Ctsc          |
| ENSMUSG000000029467 | 3.042935815 |              |          |          |             |            |            |             |             |             |               |

|                     |             |              |          |          |            |            |            |             |             |             |                |
|---------------------|-------------|--------------|----------|----------|------------|------------|------------|-------------|-------------|-------------|----------------|
| ENSMUSG00000029822  | 4.068553038 | 2.024515798  | 9.35E-33 | 6.27E-31 | 521.825878 | 511.812429 | 443.505726 | 1967.470951 | 1687.193878 | 2361.23662  | Osplb3         |
| ENSMUSG00000027797  | 0.167692785 | -2.576107474 | 9.60E-33 | 6.42E-31 | 2025.43756 | 1566.87298 | 2351.69843 | 270.9180029 | 402.1688019 | 323.470622  | Dckl1          |
| ENSMUSG00000047953  | 40.13666323 | 5.326848778  | 1.03E-32 | 6.89E-31 | 7.17286431 | 7.85892406 | 8.69619071 | 332.4902763 | 415.5744286 | 197.841359  | Gp5            |
| ENSMUSG00000027883  | 4.262675897 | 2.091759367  | 1.53E-32 | 1.02E-30 | 412.439697 | 366.422334 | 383.874704 | 1947.578371 | 1345.350397 | 1664.835036 | Gpsm2          |
| ENSMUSG00000031875  | 0.26901608  | -1.894235683 | 1.89E-32 | 1.25E-30 | 1625.55037 | 1627.77965 | 2154.17067 | 473.6328722 | 480.6874728 | 499.5494315 | Cmtm3          |
| ENSMUSG00000034353  | 3.728513142 | 1.898600427  | 1.96E-32 | 1.29E-30 | 567.552887 | 724.985745 | 814.957301 | 2517.832349 | 2637.078287 | 2691.63169  | Ramp1          |
| ENSMUSG00000035965  | 2.837634382 | 1.504688716  | 2.53E-32 | 1.66E-30 | 2065.78492 | 1632.69147 | 1805.08073 | 5287.637386 | 5395.764579 | 4937.131114 | Pde5a          |
| ENSMUSG00000031387  | 0.226411814 | -2.142978856 | 3.01E-32 | 1.97E-30 | 389.127888 | 446.976306 | 434.809536 | 93.7793087  | 88.09411851 | 105.8451271 | Renbp          |
| ENSMUSG00000030787  | 0.385367322 | -1.375693853 | 5.13E-32 | 3.34E-30 | 1615.68768 | 1406.74741 | 1578.97977 | 586.3574958 | 608.9984715 | 577.6967684 | Lyve1          |
| ENSMUSG00000026305  | 2.80084886  | 1.485864134  | 5.65E-32 | 3.66E-30 | 2902.32022 | 3674.047   | 3149.26335 | 8616.329212 | 9224.98628  | 9398.453761 | Lrrfip1        |
| ENSMUSG00000078771  | 0.09935321  | -3.331289603 | 6.92E-32 | 4.47E-30 | 438.44133  | 729.897572 | 685.756753 | 51.1523502  | 78.51867085 | 54.40637373 | Evi2a          |
| ENSMUSG00000037145  | 149.797667  | 7.226871345  | 8.25E-32 | 5.30E-30 | 2.68982411 | 1.96473102 | 2.48462592 | 468.8965435 | 302.5841462 | 298.7404521 | E2120407C18Rik |
| ENSMUSG00000052430  | 6.704572956 | 2.745145443  | 9.02E-32 | 5.78E-30 | 97.730276  | 68.7655855 | 80.7503423 | 533.3106141 | 664.5360679 | 462.9487801 | Bmpr1b         |
| ENSMUSG00000073489  | 0.130083358 | -2.94291689  | 1.01E-31 | 6.47E-30 | 815.016706 | 1343.8761  | 1218.70901 | 133.56447   | 181.935056  | 123.6508494 | Ifi204         |
| ENSMUSG00000073421  | 0.105428878 | -3.245658005 | 1.10E-31 | 7.01E-30 | 5814.50312 | 13533.0672 | 9856.51102 | 1113.984515 | 947.9693188 | 1016.904585 | H2-Ab1         |
| ENSMUSG00000031870  | 13.79459158 | 3.786030838  | 1.37E-31 | 8.68E-30 | 12.5525125 | 29.4709652 | 28.5731981 | 340.0684023 | 278.645527  | 341.2763443 | Pgr            |
| ENSMUSG00000055950  | 4.166719555 | 2.058912001  | 1.40E-31 | 8.83E-30 | 152.423366 | 188.614177 | 197.527761 | 678.242273  | 830.1913125 | 729.045408  | P2rx5          |
| ENSMUSG00000041773  | 0.292553178 | -1.773229206 | 1.49E-31 | 9.34E-30 | 746.874495 | 687.655855 | 782.657164 | 192.2949461 | 234.5984678 | 221.5823221 | Enc1           |
| ENSMUSG00000031328  | 3.299715487 | 1.722341636  | 2.08E-31 | 1.30E-29 | 72924.7181 | 59907.5957 | 51882.7161 | 205555.7193 | 198111.2245 | 205851.9557 | Flna           |
| ENSMUSG00000033066  | 0.319586292 | -1.645722565 | 2.40E-31 | 1.50E-29 | 1744.79924 | 1938.20715 | 2258.52496 | 607.1973422 | 635.8097249 | 654.8548984 | Gas7           |
| ENSMUSG00000026110  | 3.009000486 | 1.58928434   | 2.91E-31 | 1.81E-29 | 942.335047 | 771.156923 | 757.810905 | 2407.002257 | 2379.498745 | 2657.009452 | Mgat4a         |
| ENSMUSG00000053646  | 2.39338716  | 1.259053789  | 3.14E-31 | 1.94E-29 | 1055.30766 | 934.229598 | 995.09268  | 2506.46516  | 2277.998999 | 2360.247413 | P1xbn1         |
| ENSMUSG00000019944  | 4.673815124 | 2.224600669  | 3.21E-31 | 1.98E-29 | 766.599872 | 623.802097 | 560.283145 | 3628.027801 | 2972.218955 | 2525.444948 | Rhobtb1        |
| ENSMUSG00000046329  | 3.026675831 | 1.597734165  | 3.65E-31 | 2.24E-29 | 1137.7956  | 937.176694 | 909.373086 | 3249.121504 | 2840.077777 | 2950.80387  | Slc25a23       |
| ENSMUSG00000061119  | 0.363391457 | -1.46040359  | 3.84E-31 | 2.35E-29 | 1413.95087 | 1629.74438 | 1610.0376  | 560.7813207 | 600.3805686 | 529.2256354 | Prp            |
| ENSMUSG00000037656  | 2.043395267 | 1.0309683    | 4.56E-31 | 2.78E-29 | 1016.75351 | 1046.21927 | 1039.81595 | 2131.347925 | 2100.853218 | 2107.010474 | Slc20a2        |
| ENSMUSG00000030562  | 4.376615535 | 2.129815656  | 4.95E-31 | 3.01E-29 | 1912.46494 | 1360.57623 | 1432.38684 | 8029.971716 | 6456.72436  | 6114.287201 | Nox4           |
| ENSMUSG00000013584  | 0.080882413 | -3.628030151 | 5.02E-31 | 3.04E-29 | 308.433165 | 445.99394  | 339.151438 | 34.1015668  | 36.38670112 | 17.80572231 | Aldh1a2        |
| ENSMUSG00000038521  | 0.290884902 | -1.78147968  | 5.66E-31 | 3.42E-29 | 11116.1464 | 8303.93564 | 8229.08104 | 2556.670244 | 2698.361152 | 2788.573955 | C1s1           |
| ENSMUSG00000021838  | 2.895116807 | 1.533621556  | 8.19E-31 | 4.93E-29 | 1310.84095 | 1507.93105 | 1662.21474 | 4254.170458 | 4642.177028 | 4067.618342 | Samd4          |
| ENSMUSG00000057337  | 4.620314117 | 2.207990938  | 9.04E-31 | 5.42E-29 | 393.610928 | 291.762556 | 263.370347 | 1322.382979 | 1451.637866 | 1620.32073  | Chst3          |
| ENSMUSG00000079227  | 0.055858604 | -4.162076664 | 1.05E-30 | 6.30E-29 | 555.000375 | 970.577121 | 812.472675 | 46.41602148 | 62.24040982 | 21.76254949 | Ccr5           |
| ENSMUSG00000044676  | 6.187069437 | 2.629256225  | 1.33E-30 | 7.90E-29 | 86.9709796 | 105.113109 | 109.32354  | 773.9161132 | 521.8618977 | 563.8478732 | Zfp612         |
| ENSMUSG00000020709  | 0.149536166 | -2.74143365  | 1.87E-30 | 1.11E-28 | 347.883918 | 389.999107 | 441.021101 | 65.36133637 | 67.02813365 | 43.52509899 | Adap2          |
| ENSMUSG00000001630  | 2.608108431 | 1.38300385   | 2.35E-30 | 1.39E-28 | 1594.16909 | 1341.91128 | 1365.30194 | 3835.478999 | 3498.868577 | 3889.561118 | Stk38l         |
| ENSMUSG00000031342  | 0.234693218 | -2.09115194  | 2.42E-30 | 1.43E-28 | 1434.57286 | 1212.23904 | 1668.4263  | 332.4902763 | 385.8905409 | 293.7944182 | Gpm6b          |
| ENSMUSG00000058793  | 2.254015731 | 1.172497584  | 2.68E-30 | 1.57E-28 | 3001.84371 | 2711.3288  | 2795.20416 | 6788.106325 | 6391.611316 | 6000.528419 | Cds2           |
| ENSMUSG00000026113  | 2.256270894 | 1.173940292  | 2.72E-30 | 1.59E-28 | 1302.77148 | 1292.79301 | 1201.31663 | 2687.392917 | 2984.667037 | 2899.365117 | Imp4a          |
| ENSMUSG00000049493  | 81.81353938 | 6.35426771   | 2.73E-30 | 1.59E-28 | 4.48304019 | 4.91182754 | 1.24231296 | 227.3437787 | 428.0225106 | 253.2369396 | Pls1           |
| ENSMUSG00000069378  | 4.689621295 | 2.229471424  | 2.99E-30 | 1.74E-28 | 243.877386 | 198.437833 | 289.458919 | 1183.134915 | 971.9079397 | 1269.152318 | Prdm6          |
| ENSMUSG00000059921  | 5.257457812 | 2.394365368  | 3.07E-30 | 1.78E-28 | 330.848366 | 222.014605 | 253.431844 | 1285.439615 | 1266.831726 | 1692.532864 | Unc5c          |
| ENSMUSG00000031661  | 2.491349481 | 1.316927414  | 3.57E-30 | 2.06E-28 | 936.058791 | 934.229598 | 1083.2969  | 2379.53155  | 2399.607185 | 2571.937667 | Nkd1           |
| ENSMUSG00000034853  | 3.512335664 | 1.812430726  | 3.86E-30 | 2.22E-28 | 442.027762 | 372.316527 | 326.728308 | 1441.738463 | 1247.680831 | 1327.515519 | Acot11         |
| ENSMUSG000000110631 | 0.241380941 | -2.050616328 | 4.46E-30 | 2.56E-28 | 1298.28844 | 1168.03259 | 980.184925 | 264.2871427 | 321.7350415 | 246.312492  | Gm42047        |
| ENSMUSG00000021922  | 10.71441734 | 3.421481492  | 5.30E-30 | 3.03E-28 | 520.92927  | 320.251155 | 260.885721 | 5330.264344 | 3010.520746 | 3484.975539 | Itih4          |
| ENSMUSG00000024538  | 0.321846828 | -1.635553843 | 7.31E-30 | 4.16E-28 | 4240.05941 | 3546.33948 | 4558.04625 | 1221.025545 | 1451.637866 | 1299.817729 | Ppic           |
| ENSMUSG00000004552  | 60.54782497 | 9.52000323   | 1.33E-29 | 7.53E-28 | 10.7592964 | 8.84128957 | 3.72693888 | 240.6054991 | 761.2480893 | 447.1214714 | Ctse           |
| ENSMUSG00000022463  | 2.322274298 | 1.215538388  | 1.93E-29 | 1.09E-27 | 885.848741 | 983.347873 | 1023.66588 | 2181.553009 | 2246.400022 | 2284.07849  | Sreb2          |
| ENSMUSG00000026527  | 11.30467569 | 3.498847699  | 2.26E-29 | 1.27E-27 | 54.6930903 | 21.6120412 | 36.0270758 | 418.6914591 | 400.2537124 | 458.0027461 | Rgs7           |
| ENSMUSG00000052160  | 0.11359611  | -3.137970198 | 2.37E-29 | 1.33E-27 | 856.260675 | 1603.22051 | 1478.35242 | 176.1914285 | 155.1225222 | 115.737195  | Pld4           |
| ENSMUSG00000099398  | 0.442803201 | -4.546137503 | 2.78E-29 | 1.55E-27 | 212.496105 | 181.737619 | 145.350616 | 8.5253917   | 6.702813365 | 7.913654361 | Nsa4a14        |
| ENSMUSG00000044968  | 6.345443038 | 2.665720896  | 2.83E-29 | 1.57E-27 | 348.780526 | 295.692018 | 185.104631 | 1543.095898 | 1826.03787  | 1911.147528 | Napepld        |
| ENSMUSG00000054690  | 0.461418354 | -1.115852704 | 2.86E-29 | 1.58E-27 | 1801.28555 | 1970.6251  | 1857.25787 | 858.2227645 | 862.7478346 | 876.4372205 | Emcn           |
| ENSMUSG00000021458  | 2.361754413 | 1.239858954  | 3.56E-29 | 1.96E-27 | 2337.45715 | 2280.07034 | 2495.80674 | 5104.815097 | 5679.19801  | 6012.398901 | 201011101Rik   |
| ENSMUSG00000041075  | 2.356353737 | 1.236556134  | 4.01E-29 | 2.21E-27 | 1167.38366 | 1024.60722 | 1103.17391 | 2620.137049 | 2707.9366   | 2437.405543 | Fzd7           |
| ENSMUSG00000059279  | 98.85917241 | 6.627302924  | 4.33E-29 | 2.37E-27 | 2.68982411 | 1.96473102 | 2.48462592 | 254.8144853 | 224.0654573 | 227.5176529 | Olf224         |
| ENSMUSG00000040552  | 0.79881209  | -3.645984066 | 5.40E-29 | 2.95E-27 | 618.603138 | 1230.04506 | 1008.75812 | 102.3047004 | 99.58465571 | 41.54668294 | C3ar1          |
| ENSMUSG00000042734  | 0.203374002 | -2.297792832 | 7.11E-29 | 3.87E-27 | 277.051883 | 308.462769 | 330.455247 | 66.30860211 | 60.32532029 | 59.35240771 | Ttc9           |
| ENSMUSG00000040613  | 0.231516829 | -2.110811026 | 8.05E-29 | 4.37E-27 | 886.745349 | 1157.22657 | 916.826964 | 269.0234714 | 212.5749382 | 203.7765998 | Apobec1        |
| ENSMUSG00000020097  | 0.429181455 | -1.220340355 | 8.34E-29 | 4.51E-27 | 1794.11268 | 1682.79211 | 1665.94168 | 753.0762668 | 767.9509027 | 686.5095158 | Sgpl1          |
| ENSMUSG00000037336  | 9.558176357 | 3.256735387  | 1.30E-28 | 7.01E-27 | 40.3473617 | 54.0301029 | 54.6617702 | 549.4141318 | 545.8005169 | 323.470622  | Mfsd2b         |
| ENSMUSG00000041515  | 0.143570403 | -2.800169727 | 1.37E-28 | 7.32E-27 | 709.216957 | 1187.6799  | 1095.72003 | 174.296897  | 123.5232749 | 131.5645038 | Irf8           |
| ENSMUSG00000025154  | 0.225223693 | -2.15056949  | 1.50E-28 | 8.00E-27 | 403.473617 | 454.83523  | 526.740695 | 96.62110594 | 112.9902824 | 101.8882999 | Arhgap19       |
| ENSMUSG00000069763  | 0.350777492 | -1.511371915 | 1.61E-28 | 8.60E-27 | 910.057158 | 834.028316 | 768.991722 | 288.9160521 | 302.5841462 | 290.8267978 | Tmem100        |
| ENSMUSG00000049625  | 0.114588005 | -3.125472069 | 1.64E-28 | 8.71E-27 | 255.533291 | 429.293727 | 376.420827 | 40.73242701 | 40.21688019 | 40.5574786  | Tifab          |
| ENSMUSG00000031994  | 2.744224369 | 1.456398442  | 1.75E-28 | 9.24E-27 | 725.355902 | 713.197358 | 600.037159 | 1894.531489 | 1736.028662 | 1971.489143 | Adams28        |
| ENSMUSG00000055691  | 19.47425222 | 4.283496027  | 2.45E-28 | 1.29E-26 | 10.7592964 | 9.82365508 | 4.96925184 | 189.4531489 | 156.0797969 | 166.1867416 | Gja6           |
| ENSMUSG00000052512  | 3.960043791 | 1.985516384  | 2.51E-28 | 1.32E-26 | 344.297486 | 439.117382 | 352.81688  | 1293.965007 |             |             |                |

|                     |              |              |          |          |            |            |            |             |              |             |           |
|---------------------|--------------|--------------|----------|----------|------------|------------|------------|-------------|--------------|-------------|-----------|
| ENSMUSG00000049107  | 2.994095157  | 1.582120073  | 1.50E-27 | 7.51E-26 | 249.257034 | 211.208584 | 222.37402  | 644.1407062 | 709.5406719  | 693.4339634 | Ntf3      |
| ENSMUSG00000033684  | 2.006210489  | 1.004472979  | 1.58E-27 | 7.88E-26 | 3124.67901 | 3460.87368 | 3187.77505 | 6614.756694 | 6676.959656  | 6316.085387 | Qsox1     |
| ENSMUSG00000001435  | 2.766344091  | 1.467980617  | 2.33E-27 | 1.16E-25 | 13108.4095 | 11076.1711 | 9765.82217 | 30845.81444 | 31853.6842   | 31229.25852 | Col18a1   |
| ENSMUSG000000031963 | 0.125503852  | -2.994196454 | 2.74E-27 | 1.36E-25 | 680.5255   | 434.205554 | 629.85267  | 55.88867892 | 94.7969388   | 68.25526886 | Bmper     |
| ENSMUSG00000026872  | 0.490345345  | -1.028129913 | 3.20E-27 | 1.58E-25 | 5066.73202 | 4485.48091 | 4780.42027 | 2331.220997 | 2384.286468  | 2312.765487 | Zeb2      |
| ENSMUSG00000020689  | 2.517474225  | 1.331977007  | 4.82E-27 | 2.37E-25 | 1481.19648 | 1284.93408 | 1498.22943 | 3895.156741 | 3338.001056  | 3499.813641 | Igfb3     |
| ENSMUSG00000033880  | 0.273787029  | -1.868873996 | 5.13E-27 | 2.52E-25 | 1525.13027 | 1219.76842 | 1577.73746 | 461.3184176 | 506.5411814  | 464.9271937 | Lgals3bp  |
| ENSMUSG00000021322  | 0.075534853  | -3.726713705 | 8.43E-27 | 4.11E-25 | 151.526758 | 222.014605 | 188.83157  | 11.36718893 | 16.27826103  | 14.83810193 | Aoah      |
| ENSMUSG00000024610  | 0.131002143  | -2.932373684 | 9.11E-27 | 4.43E-25 | 11793.9821 | 25280.194  | 16577.4241 | 2613.506189 | 1880.617921  | 2534.347809 | Cd74      |
| ENSMUSG00000045903  | 3.340562516  | 1.740091058  | 9.76E-27 | 4.74E-25 | 181.114823 | 147.354826 | 157.773746 | 512.4707678 | 542.9278826  | 571.7615276 | Npas4     |
| ENSMUSG00000038156  | 0.33834679   | -1.563425393 | 1.03E-26 | 5.00E-25 | 2402.90954 | 1889.08887 | 2227.46714 | 766.3379873 | 776.5688056  | 662.7685527 | Spon1     |
| ENSMUSG00000049037  | 0.10252821   | -3.285907188 | 1.35E-26 | 6.51E-25 | 471.615827 | 856.622723 | 655.941242 | 52.09961595 | 91.92429758  | 59.35240771 | Clec4a1   |
| ENSMUSG00000020900  | 6.094317595  | 2.607464686  | 1.61E-26 | 7.74E-25 | 2892.45753 | 1733.87512 | 1595.12984 | 12105.10895 | 11052.93924  | 14770.83586 | Mylh10    |
| ENSMUSG00000002020  | 0.279831692  | -1.83736873  | 1.80E-26 | 8.60E-25 | 5347.37033 | 4242.83663 | 3703.33493 | 1106.40639  | 1316.624054  | 1297.839315 | Ltb2p     |
| ENSMUSG00000056602  | 2.559212994  | 1.355700223  | 1.80E-26 | 8.60E-25 | 1786.93982 | 1473.54826 | 1437.35609 | 3889.473147 | 3965.192878  | 4175.441882 | Fry       |
| ENSMUSG000000021871 | 0.371289421  | -1.429383884 | 1.83E-26 | 8.69E-25 | 2172.48127 | 2440.19592 | 2237.40564 | 830.7520579 | 954.6721321  | 757.7324051 | Pnp       |
| ENSMUSG00000048458  | 2.851768481  | 1.511856862  | 2.03E-26 | 9.65E-25 | 534.37839  | 426.34663  | 470.836612 | 1461.631044 | 1350.138121  | 1273.109145 | Fam212b   |
| ENSMUSG00000032011  | 0.253486872  | -1.980017061 | 2.14E-26 | 1.01E-24 | 2870.04233 | 2971.65566 | 4169.20229 | 803.2813513 | 945.0966845  | 788.3978157 | Thy1      |
| ENSMUSG00000022636  | 2.88344391   | 1.527792959  | 2.35E-26 | 1.11E-24 | 348.780526 | 382.140182 | 326.728308 | 1125.351704 | 946.0542292  | 981.2931408 | Alcam     |
| ENSMUSG00000042613  | 2.780438595  | 1.475312476  | 2.51E-26 | 1.18E-24 | 592.47573  | 7369.70604 | 8020.37246 | 19777.96148 | 19459.222474 | 20025.50236 | Pbxip1    |
| ENSMUSG00000062980  | 4.10840261   | 2.038577568  | 2.50E-26 | 1.18E-24 | 3531.73906 | 2561.02688 | 2192.68237 | 12257.61873 | 10650.77044  | 11143.41455 | Cped1     |
| ENSMUSG00000054203  | 0.130429774  | -2.93865485  | 2.98E-26 | 1.39E-24 | 475.20226  | 800.627889 | 565.252396 | 64.41407062 | 100.5422005  | 75.17971643 | Ifi205    |
| ENSMUSG00000031239  | 0.138177638  | -2.855403936 | 3.81E-26 | 1.78E-24 | 2246.89974 | 1399.87847 | 2376.54469 | 265.2344084 | 359.0792874  | 207.733947  | Itm2a     |
| ENSMUSG00000035873  | 3.33144095   | 1.736146322  | 4.06E-26 | 1.89E-24 | 576.518968 | 499.041678 | 422.386406 | 1710.761934 | 1487.067022  | 1801.345574 | Pawr      |
| ENSMUSG00000006574  | 480.0426694  | 8.907018838  | 4.14E-26 | 1.92E-24 | 3.58643215 | 1.96473102 | 13.6654426 | 3166.709384 | 4337.677992  | 1452.155575 | Slc4a1    |
| ENSMUSG00000062593  | 0.138791282  | -2.849911141 | 5.09E-26 | 2.35E-24 | 1129.72613 | 1648.40932 | 1096.96234 | 231.1328416 | 182.8910504  | 123.6508494 | Lilrb4a   |
| ENSMUSG00000062382  | 15.41482055  | 3.94624619   | 5.39E-26 | 2.49E-24 | 34.0711054 | 55.0124684 | 54.6617702 | 406.3770044 | 1059.044512  | 741.9050963 | Ftl1-ps1  |
| ENSMUSG00000038227  | 0.392744855  | -1.348335718 | 7.07E-26 | 3.25E-24 | 838.328515 | 808.486813 | 797.56492  | 305.9668355 | 346.6312055  | 307.6433133 | Hoxa9     |
| ENSMUSG00000020101  | 0.138017696  | -1.564829318 | 8.01E-26 | 3.67E-24 | 205.37298  | 262.56322  | 2273.43272 | 866.7481562 | 798.5923352  | 704.3152381 | Vsr       |
| ENSMUSG00000037820  | 2.01545038   | 1.011102265  | 8.56E-26 | 3.91E-24 | 8654.06077 | 9662.54713 | 9083.79236 | 17460.94947 | 19314.63548  | 18447.71752 | Tgm2      |
| ENSMUSG00000040964  | 2.544022803  | 1.347111602  | 8.56E-26 | 3.91E-24 | 976.406152 | 1194.55646 | 1139.20098 | 2779.277694 | 2640.908466  | 2997.296589 | Arhgef10l |
| ENSMUSG00000034449  | 7.366055144  | 2.880892198  | 9.46E-26 | 4.30E-24 | 170.355527 | 210.226219 | 167.712249 | 891.3770655 | 1871.783138  | 1317.623451 | Hhrs1     |
| ENSMUSG00000040966  | 10.37930076  | 3.37563735   | 1.03E-25 | 4.66E-24 | 16.1389447 | 16.7002136 | 18.6346944 | 176.1914285 | 203.9570353  | 151.3486397 | Slc22a2   |
| ENSMUSG00000030148  | 0.088270973  | -3.501917089 | 1.06E-25 | 4.79E-24 | 313.812813 | 515.741891 | 436.051849 | 30.31250382 | 54.58005169  | 26.70858347 | Clec4a2   |
| ENSMUSG00000037868  | 0.236693847  | -2.078905892 | 1.07E-25 | 4.83E-24 | 364.919471 | 385.087279 | 439.778788 | 95.67384019 | 105.3299243  | 80.12575041 | Egr2      |
| ENSMUSG00000056069  | 0.115537548  | -3.113566319 | 1.12E-25 | 5.03E-24 | 333.53819  | 512.794795 | 470.836612 | 45.46875573 | 68.94322318  | 37.58985821 | Fam105a   |
| ENSMUSG00000022483  | 0.01453348   | -6.104476008 | 1.13E-25 | 5.05E-24 | 310.226381 | 589.419305 | 356.543819 | 2.841797233 | 14.3631715   | 0.989206795 | Col2a1    |
| ENSMUSG00000041741  | 2.471095517  | 1.305150777  | 1.14E-25 | 5.11E-24 | 2863.76607 | 2292.84109 | 2454.81041 | 5960.196064 | 6312.1351    | 6540.633239 | Pde3a     |
| ENSMUSG00000031548  | 0.480613149  | -1.057051977 | 1.20E-25 | 5.35E-24 | 2861.97285 | 2857.70126 | 3180.32118 | 1429.424008 | 1383.652188  | 1463.03685  | Sfrp1     |
| ENSMUSG00000021215  | 2.365036119  | 1.241862217  | 1.26E-25 | 5.62E-24 | 3264.54986 | 2814.47718 | 3272.25233 | 6857.256724 | 7947.621561  | 7309.249009 | Net1      |
| ENSMUSG00000032125  | 0.377006761  | -1.407337698 | 1.26E-25 | 5.62E-24 | 1037.375   | 903.776267 | 893.223018 | 347.6465282 | 375.375484   | 346.2232783 | Robo4     |
| ENSMUSG00000039153  | 0.213574115  | -2.22719129  | 1.49E-25 | 6.60E-24 | 273.465451 | 257.379763 | 282.005042 | 65.36133637 | 50.74987262  | 57.37399412 | Runx2     |
| ENSMUSG00000028780  | 2.332955839  | 1.222158999  | 1.53E-25 | 6.77E-24 | 1130.62273 | 967.630025 | 1129.26248 | 2600.244469 | 2385.244013  | 2542.261463 | Sema3c    |
| ENSMUSG00000037362  | 2.905779357  | 1.53892516   | 1.55E-25 | 6.85E-24 | 8554.53728 | 6684.01491 | 6503.50834 | 20531.98501 | 22864.25393  | 19789.08194 | Nov       |
| ENSMUSG00000040896  | 5.111663792  | 2.353792949  | 1.66E-25 | 7.28E-24 | 73.521859  | 76.6245096 | 118.019731 | 444.2676342 | 462.4941222  | 452.0675054 | Kcnd3     |
| ENSMUSG00000025810  | 0.443718019  | -1.172284955 | 1.67E-25 | 7.30E-24 | 3006.32675 | 2531.55591 | 2716.93844 | 1210.605621 | 1208.421495  | 1244.422148 | Nrp1      |
| ENSMUSG00000050379  | 2.573940932  | 1.363978947  | 1.77E-25 | 7.72E-24 | 546.034295 | 468.588347 | 490.713619 | 1299.648601 | 1197.888503  | 1379.943479 | 6-Sep     |
| ENSMUSG00000031849  | 0.312866464  | -1.676381071 | 2.04E-25 | 8.89E-24 | 3614.227   | 2793.8475  | 3702.09262 | 932.1094926 | 1131.817914  | 1099.008749 |           |
| ENSMUSG00000020676  | 0.345544498  | -1.533056586 | 2.09E-25 | 9.05E-24 | 712.803389 | 867.428743 | 849.742064 | 282.2851918 | 270.9851689  | 285.8807638 | Ccl11     |
| ENSMUSG00000024349  | 0.28547846   | -1.808545419 | 2.46E-25 | 1.06E-23 | 650.937435 | 802.59262  | 648.487365 | 224.5019814 | 187.6787742  | 187.9492911 | Tmem173   |
| ENSMUSG00000069793  | 0.127779569  | -2.968270916 | 2.62E-25 | 1.13E-23 | 272.568843 | 380.175451 | 427.355658 | 38.83789552 | 58.41023075  | 40.5574786  | Sfnr      |
| ENSMUSG00000029581  | 0.131167893  | -2.930513469 | 2.66E-25 | 1.14E-23 | 1102.82789 | 1298.6872  | 2065.96645 | 151.5625191 | 242.2588529  | 191.9061183 | Fscn1     |
| ENSMUSG00000044350  | 0.1221105403 | -3.045664859 | 2.74E-25 | 1.17E-23 | 362.229647 | 399.822762 | 245.977966 | 43.57422425 | 46.91969356  | 31.65461744 | Lacc1     |
| ENSMUSG00000045763  | 0.079139296  | -3.659461958 | 3.41E-25 | 1.46E-23 | 579.208792 | 865.464012 | 1364.05963 | 73.88672807 | 96.71202141  | 51.43873533 | Basp1     |
| ENSMUSG00000097617  | 2.536128681  | 1.342627949  | 3.63E-25 | 1.55E-23 | 288.707788 | 293.727287 | 327.970621 | 770.1270502 | 787.101798   | 746.8511303 | Gm10687   |
| ENSMUSG00000038264  | 0.292128631  | -1.775324334 | 4.02E-25 | 1.71E-23 | 563.069847 | 548.159953 | 660.910494 | 152.5097849 | 187.6787742  | 177.0680162 | Sema7a    |
| ENSMUSG00000022434  | 2.224000029  | 1.153156807  | 4.25E-25 | 1.81E-23 | 475.20226  | 472.517809 | 467.109673 | 1098.828264 | 1027.445534  | 1020.861413 | Fam118a   |
| ENSMUSG00000039109  | 0.414480711  | -1.27062313  | 4.37E-25 | 1.85E-23 | 1955.50213 | 1807.55253 | 1868.43869 | 721.8164973 | 865.6204689  | 746.8511303 | F13a1     |
| ENSMUSG00000058013  | 0.442471022  | -1.176345119 | 5.00E-25 | 2.12E-23 | 2268.41833 | 2386.16582 | 2653.58048 | 1030.62513  | 1115.539653  | 1086.149061 | 11-Sep    |
| ENSMUSG00000006576  | 2.229549346  | 1.15675213   | 5.11E-25 | 2.15E-23 | 1533.19974 | 1600.27341 | 1785.20372 | 3520.039536 | 3562.066531  | 3877.690637 |           |
| ENSMUSG00000018920  | 0.19081126   | -2.389781788 | 5.12E-25 | 2.15E-23 | 1040.06532 | 1839.9706  | 1694.51488 | 296.494178  | 288.2209747  | 287.8591774 | Cxcl16    |
| ENSMUSG00000028926  | 0.333543924  | -1.584051336 | 6.50E-25 | 2.72E-23 | 1371.8103  | 1029.51905 | 1212.49745 | 396.9043469 | 403.1263467  | 405.574786  | Cdk14     |
| ENSMUSG00000019789  | 2.358414632  | 1.23781738   | 7.96E-25 | 3.32E-23 | 884.055525 | 770.174558 | 770.234035 | 1818.750229 | 1872.957563  | 2030.841155 | Hey2      |
| ENSMUSG00000036553  | 0.262730283  | -1.928345597 | 8.02E-25 | 3.34E-23 | 490.444596 | 537.353933 | 434.809536 | 119.3554838 | 147.461894   | 117.7156086 | Sh3tc1    |
| ENSMUSG00000036305  | 25.93631537  | 4.696901633  | 8.46E-25 | 3.51E-23 | 20.6219849 | 22.5944067 | 31.057824  | 265.2344084 | 679.8567842  | 969.4226592 | Rpl39-ps  |
| ENSMUSG00000035352  | 0.048826415  | -4.356194326 | 8.49E-25 | 3.52E-23 | 150.63015  | 266.221053 | 334.182186 | 15.15625191 | 10.53299243  | 10.88127475 | Ccl12     |
| ENSMUSG00000019843  | 0.468116848  | -1.095059405 | 9.23E-25 | 3.82E-23 | 1327.8765  | 1227.95688 | 1265.91691 | 612.8809367 | 592.7202104  | 583.6320091 | Fyn       |
| ENSMUSG00000004730  | 0.119138582  | -3.069287408 | 1.20     |          |            |            |            |             |              |             |           |

|                     |             |              |          |          |            |            |            |             |             |             |               |
|---------------------|-------------|--------------|----------|----------|------------|------------|------------|-------------|-------------|-------------|---------------|
| ENSMUSG00000078652  | 5.116979257 | 2.355292385  | 4.58E-24 | 1.81E-22 | 899.297861 | 1014.78357 | 1059.69295 | 4517.510335 | 6928.79393  | 3766.899476 | Psme3         |
| ENSMUSG00000040133  | 0.053505526 | -4.224168282 | 5.68E-24 | 2.24E-22 | 242.980778 | 307.480404 | 458.413482 | 12.31445468 | 29.68388776 | 11.87048154 | Gpr176        |
| ENSMUSG00000004098  | 0.179635887 | -2.476852496 | 5.72E-24 | 2.25E-22 | 2024.54095 | 2268.28196 | 2669.73055 | 282.2851918 | 541.9703738 | 426.3481287 | Col5a3        |
| ENSMUSG000000038025 | 2.044093139 | 1.031460934  | 6.56E-24 | 2.58E-22 | 1211.31746 | 1148.38528 | 1202.55894 | 2264.912395 | 2504.937109 | 2511.596035 | Phf2          |
| ENSMUSG00000054808  | 2.227693144 | 1.155550521  | 6.63E-24 | 2.60E-22 | 13463.4663 | 12516.3189 | 11073.9777 | 28968.33373 | 27324.49746 | 26259.48358 | Actn4         |
| ENSMUSG00000024663  | 0.352407089 | -1.504685151 | 6.66E-24 | 2.61E-22 | 1064.27374 | 1166.06786 | 1226.16289 | 354.2773884 | 454.8337641 | 408.5424064 | Rab3i1        |
| ENSMUSG00000053063  | 0.094876532 | -3.397804908 | 6.93E-24 | 2.70E-22 | 427.682034 | 907.705729 | 680.787502 | 43.57422425 | 79.47621561 | 68.25526886 | Clec12a       |
| ENSMUSG00000028883  | 3.135712539 | 1.648793309  | 7.51E-24 | 2.92E-22 | 136.284422 | 155.21375  | 134.1698   | 449.0039629 | 420.3621525 | 466.9056073 | Sema3a        |
| ENSMUSG00000039646  | 2.665204314 | 1.414246134  | 8.30E-24 | 3.22E-22 | 1735.83316 | 1487.30138 | 1961.61216 | 4274.063039 | 4842.303884 | 4695.764656 | Vasn          |
| ENSMUSG00000044811  | 0.080402908 | -3.636608505 | 8.58E-24 | 3.32E-22 | 322.778893 | 700.426607 | 542.890763 | 50.20508446 | 48.83478309 | 26.70858347 | Cd300c2       |
| ENSMUSG00000019929  | 0.328998271 | -1.603848093 | 8.74E-24 | 3.37E-22 | 59095.4357 | 51368.8748 | 74779.7863 | 19462.52199 | 20909.90506 | 20571.54451 | Dcn           |
| ENSMUSG00000006651  | 3.173133337 | 1.665908146  | 9.14E-24 | 3.51E-22 | 145.250502 | 120.830957 | 146.592929 | 431.9531795 | 432.8102344 | 443.1664442 | Aplp1         |
| ENSMUSG00000020218  | 1.80268771  | 4.232866995  | 9.14E-24 | 3.51E-22 | 10.7592964 | 9.82365508 | 34.7847629 | 307.861367  | 332.268034  | 368.9741346 | Wif1          |
| ENSMUSG00000072589  | 86.30872474 | 6.4314345    | 9.85E-24 | 3.77E-22 | 0.89660804 | 0.98265651 | 6.2115648  | 152.5097849 | 242.2588259 | 234.4420104 | Gm10371       |
| ENSMUSG00000040950  | 0.189077155 | -2.402953034 | 1.02E-23 | 3.90E-22 | 665.283163 | 720.073917 | 445.990352 | 108.9355606 | 107.2450138 | 130.575297  | Mgl2          |
| ENSMUSG00000048915  | 3.273918767 | 1.711018526  | 1.03E-23 | 3.93E-22 | 307.536557 | 365.439969 | 448.474978 | 1248.496251 | 1246.723286 | 1166.272811 | Efna5         |
| ENSMUSG00000026259  | 3.96707955  | 1.988077327  | 1.09E-23 | 4.13E-22 | 153.319974 | 140.478268 | 187.589257 | 714.238713  | 653.045307  | 536.150083  | Ngef          |
| ENSMUSG00000037621  | 2.875310198 | 1.523717607  | 1.11E-23 | 4.21E-22 | 425.888818 | 492.165119 | 551.586954 | 1298.701336 | 1537.816895 | 1381.921893 | Atoh8         |
| ENSMUSG00000015316  | 44.32278948 | 5.469976776  | 1.13E-23 | 4.28E-22 | 7.1728643  | 5.89419305 | 12.4231296 | 255.761751  | 645.3851726 | 207.733427  | Slamf1        |
| ENSMUSG00000056592  | 3.490372389 | 1.803380966  | 1.14E-23 | 4.30E-22 | 253.740074 | 207.279122 | 206.223951 | 865.8008904 | 802.4225143 | 664.7469663 | Col145a       |
| ENSMUSG00000091971  | 6.532587433 | 2.707654529  | 1.16E-23 | 4.39E-22 | 442.92437  | 396.875665 | 500.652123 | 1814.013901 | 3060.313074 | 3878.679844 | Hspa1a        |
| ENSMUSG00000012519  | 0.256951656 | -1.960431147 | 1.22E-23 | 4.58E-22 | 348.780526 | 424.381899 | 370.209262 | 105.1464976 | 103.4148348 | 85.07178438 | Mkl1          |
| ENSMUSG00000037095  | 0.397503876 | -1.330959168 | 1.32E-23 | 4.94E-22 | 2537.40074 | 2953.97308 | 3273.49465 | 1152.822411 | 1188.313055 | 1141.544642 | Lrg1          |
| ENSMUSG00000028465  | 2.317962918 | 1.212857487  | 1.35E-23 | 5.07E-22 | 8076.6452  | 7292.09916 | 6471.2082  | 17813.33232 | 16178.67637 | 16640.43671 | Tln1          |
| ENSMUSG00000032411  | 7.558344789 | 2.918070332  | 1.38E-23 | 5.15E-22 | 698.457661 | 562.895436 | 439.778788 | 2940.312871 | 6185.739191 | 3741.180099 | Tfdp2         |
| ENSMUSG00000020427  | 0.157186776 | -2.69448243  | 1.38E-23 | 5.15E-22 | 573.76765  | 1612.0618  | 2688.36524 | 232.0801074 | 414.6168839 | 333.36269   | Igfbbp3       |
| ENSMUSG00000024885  | 0.241600972 | -2.049301834 | 1.53E-23 | 5.68E-22 | 315.606029 | 404.734589 | 409.963277 | 95.67384019 | 91.92429758 | 85.07178438 | Aldh3b1       |
| ENSMUSG00000006344  | 0.19036141  | -2.393187049 | 1.59E-23 | 5.92E-22 | 634.79849  | 757.403806 | 1046.02751 | 139.2480644 | 180.9759609 | 143.4349853 | Ggt5          |
| ENSMUSG00000005836  | 2.159866469 | 1.110942123  | 1.64E-23 | 6.08E-22 | 572.035928 | 573.701456 | 532.95226  | 1263.65526  | 1166.289526 | 1198.918636 | Gata6         |
| ENSMUSG00000031613  | 0.279844664 | -1.837302887 | 1.66E-23 | 6.14E-22 | 312.916205 | 330.074811 | 354.059193 | 97.56837168 | 85.22148421 | 95.95305913 | Hpgd          |
| ENSMUSG00000023992  | 0.057296401 | -4.125411657 | 1.68E-23 | 6.19E-22 | 589.968088 | 900.82917  | 1074.60071 | 39.78516127 | 83.3063968  | 23.74096308 | Trem2         |
| ENSMUSG00000030579  | 0.199265123 | -2.327238874 | 2.02E-23 | 7.45E-22 | 1011.37387 | 1570.80245 | 1318.09405 | 289.8633178 | 290.346462  | 196.8521522 | Tyrobp        |
| ENSMUSG00000031494  | 0.097431347 | -3.359470184 | 2.13E-23 | 7.82E-22 | 178.424999 | 147.354826 | 168.954562 | 12.31445468 | 22.02352963 | 13.84889513 | Cd209a        |
| ENSMUSG00000047592  | 0.074580373 | -3.745060171 | 2.14E-23 | 7.82E-22 | 187.39108  | 216.120412 | 268.339599 | 14.20898617 | 25.85370869 | 9.892067951 | Nxpe5         |
| ENSMUSG00000026469  | 2.972244951 | 1.573977923  | 2.26E-23 | 8.28E-22 | 1149.4515  | 963.700563 | 846.015125 | 3071.982809 | 2625.58775  | 3120.947349 | Xpr1          |
| ENSMUSG00000061718  | 18.45864495 | 4.206224743  | 2.34E-23 | 8.53E-22 | 7.1728643  | 7.85892406 | 6.2115648  | 130.7226727 | 115.8629167 | 148.3810193 | Ppp1r1b       |
| ENSMUSG00000040543  | 3.041443962 | 1.604756423  | 2.35E-23 | 8.55E-22 | 348.780526 | 303.550942 | 345.363003 | 992.7345002 | 885.728909  | 1155.393537 | Pitpnm3       |
| ENSMUSG00000064080  | 4.402789811 | -1.311900904 | 2.50E-23 | 9.09E-22 | 8376.11228 | 7944.46646 | 6394.1848  | 2931.787479 | 2970.303866 | 3067.530272 | Fbln2         |
| ENSMUSG00000026090  | 8.71625852  | 3.123708987  | 2.69E-23 | 9.74E-22 | 35.8643215 | 21.6120412 | 47.2078925 | 280.3906604 | 359.0792874 | 264.1182143 | 2010300C02Rik |
| ENSMUSG00000052609  | 2.987749734 | 1.579059307  | 2.79E-23 | 1.01E-21 | 1978.81394 | 1508.91342 | 1444.80997 | 4508.037678 | 5148.718209 | 5088.479754 | Plekhh3       |
| ENSMUSG0000003687   | 0.082733337 | -3.595387408 | 2.78E-23 | 1.01E-21 | 183.804648 | 290.78019  | 211.193203 | 26.52344084 | 17.2358058  | 12.85968834 | Dpep2         |
| ENSMUSG00000022021  | 19.44435613 | 4.281279558  | 2.92E-23 | 1.05E-21 | 78.9015073 | 93.3247232 | 110.565853 | 709.5020426 | 1783.9059   | 2997.296589 | Diaph3        |
| ENSMUSG00000034429  | 3.188774823 | 1.673002225  | 3.72E-23 | 1.34E-21 | 307.536557 | 290.78019  | 409.963277 | 1076.093886 | 1048.511519 | 1081.203027 | Zfp707        |
| ENSMUSG00000062960  | 0.379097805 | -1.39935799  | 3.84E-23 | 1.37E-21 | 2221.79472 | 1741.73404 | 1798.86916 | 741.7090779 | 706.6680376 | 736.9590624 | Kdr           |
| ENSMUSG00000022037  | 2.626597815 | 1.393195312  | 4.01E-23 | 1.43E-21 | 6063.76015 | 5341.12126 | 4440.02652 | 14208.0389  | 13875.78121 | 13544.21944 | Clu           |
| ENSMUSG00000021262  | 0.324751288 | -1.622592849 | 4.02E-23 | 1.43E-21 | 300.727385 | 684.708759 | 718.05689  | 240.6054991 | 216.4051172 | 192.8953251 | Lvl           |
| ENSMUSG00000002900  | 0.24189138  | -2.47568739  | 4.78E-23 | 1.70E-21 | 3334.48529 | 2184.78089 | 2145.47448 | 592.988356  | 678.8992394 | 582.6428023 | Lamb1         |
| ENSMUSG00000070348  | 0.392750369 | -1.348315463 | 5.09E-23 | 1.80E-21 | 1536.78618 | 1562.94352 | 1311.88248 | 558.8867892 | 544.8429721 | 630.1247285 | Ccnd1         |
| ENSMUSG00000029516  | 0.299843819 | -1.73771686  | 5.55E-23 | 1.96E-21 | 390.024496 | 364.457603 | 365.24001  | 99.46290317 | 114.905372  | 121.6723458 | Cit           |
| ENSMUSG000000031740 | 0.20142142  | -2.311710983 | 6.01E-23 | 2.12E-21 | 19301.2812 | 9836.42583 | 13677.8657 | 3025.566788 | 2852.525859 | 2746.038063 | Mmp2          |
| ENSMUSG00000027533  | 0.345189831 | -1.534538131 | 6.15E-23 | 2.17E-21 | 1036.47889 | 1200.45065 | 1123.05092 | 326.8066818 | 412.7017943 | 420.4128879 | Fabp5         |
| ENSMUSG00000030707  | 0.132435775 | -2.916635207 | 6.67E-23 | 2.35E-21 | 1268.70037 | 2424.47807 | 2227.46714 | 341.9629338 | 249.919184  | 191.9061183 | Coro1a        |
| ENSMUSG00000027199  | 0.208637068 | -2.260932597 | 7.11E-23 | 2.50E-21 | 407.956657 | 582.542746 | 551.586954 | 87.14844849 | 118.735551  | 115.737195  | Gatm          |
| ENSMUSG00000032387  | 2.726808412 | 1.447213339  | 7.26E-23 | 2.54E-21 | 974.612936 | 1011.83647 | 1269.64384 | 2941.260137 | 3171.388266 | 2756.919338 | Rbpms2        |
| ENSMUSG00000057914  | 3.724141768 | 1.896907993  | 7.30E-23 | 2.55E-21 | 241.187562 | 198.437833 | 188.83157  | 656.4551609 | 787.101798  | 902.1565972 | Cacnb2        |
| ENSMUSG000000088185 | 45.42420713 | 5.505332258  | 7.48E-23 | 2.61E-21 | 3.58643215 | 5.89419305 | 8.69619071 | 279.4433946 | 131.183633  | 393.7043045 | Scarna2       |
| ENSMUSG00000056174  | 0.445467354 | -2.781232673 | 7.53E-23 | 2.62E-21 | 91.8.12663 | 465.641251 | 679.545189 | 85.253917   | 108.2025586 | 106.834339  | Col8a2        |
| ENSMUSG00000016382  | 2.992046149 | 1.581132427  | 1.03E-22 | 3.56E-21 | 10739.5711 | 8363.85993 | 7339.58496 | 27249.99367 | 25588.46879 | 26290.14899 | Pls3          |
| ENSMUSG00000025059  | 3.496012848 | 1.805710487  | 1.06E-22 | 3.67E-21 | 199.943592 | 201.384929 | 157.773746 | 668.7696156 | 566.8665017 | 725.0885808 | Gk            |
| ENSMUSG00000090136  | 36.8679623  | 5.204295773  | 1.07E-22 | 3.72E-21 | 16.1389447 | 14.7354826 | 21.1193203 | 190.4004146 | 818.7007753 | 898.19977   | Gm10177       |
| ENSMUSG00000005124  | 0.226506417 | -2.142376173 | 1.34E-22 | 4.62E-21 | 1144.07186 | 977.45368  | 1608.79528 | 269.9707372 | 310.2445043 | 264.1182143 | Wisp1         |
| ENSMUSG00000046318  | 0.256077064 | -1.965350056 | 1.41E-22 | 4.85E-21 | 915.436806 | 616.925539 | 705.633761 | 193.2422119 | 202.0419457 | 178.0572231 | Ccbe1         |
| ENSMUSG00000022518  | 6.671077788 | 2.737919864  | 1.57E-22 | 5.38E-21 | 41.2439697 | 29.4709652 | 24.8462592 | 200.8203378 | 236.5135573 | 207.733427  | 4930562C15Rik |
| ENSMUSG00000035208  | 0.182357277 | -2.45516032  | 1.71E-22 | 5.84E-21 | 441.131154 | 634.608118 | 623.641106 | 116.5136866 | 116.8204615 | 76.16892323 | Sfnf8         |
| ENSMUSG00000060924  | 0.212422631 | -2.23499062  | 1.82E-22 | 6.19E-21 | 328.158542 | 362.492872 | 270.824225 | 58.73047616 | 77.56112608 | 68.25526886 | Csmd1         |
| ENSMUSG00000050335  | 0.111108535 | -3.169958444 | 1.87E-22 | 6.35E-21 | 1809.35502 | 4055.20482 | 3249.8907  | 318.2812901 | 454.8337641 | 239.3880444 | Lgals3        |
| ENSMUSG00000052688  | 0.202430058 | -2.30450457  | 1.87E-22 | 6.35E-21 | 879.572484 | 1209.29194 | 1484.56399 | 249.1308908 | 274.815348  | 198.8305658 | Rab7b         |
| ENSMUSG00000053411  | 2.152253273 | 1.105847861  | 1.94E-22 | 6.59E-21 | 835        |            |            |             |             |             |               |

|                     |             |              |          |          |            |            |            |             |             |             |               |
|---------------------|-------------|--------------|----------|----------|------------|------------|------------|-------------|-------------|-------------|---------------|
| ENSMUSG00000021196  | 2.44343567  | 1.288911122  | 1.57E-21 | 5.11E-20 | 1978.81394 | 1625.81492 | 1580.22208 | 3951.04542  | 4201.706435 | 4522.653467 | Pfcp          |
| ENSMUSG00000020577  | 0.471914851 | -1.083401521 | 1.66E-21 | 5.39E-20 | 1164.69384 | 1229.92162 | 1135.47404 | 583.5156986 | 556.3335093 | 526.258015  | Tspan13       |
| ENSMUSG00000026222  | 0.349453389 | -1.516828058 | 2.28E-21 | 7.38E-20 | 1582.51319 | 2193.62218 | 1795.14223 | 676.3477415 | 651.1304412 | 619.2434538 | Sp100         |
| ENSMUSG00000047466  | 0.304398185 | -1.71596834  | 2.52E-21 | 8.16E-20 | 640.178138 | 575.666187 | 637.306548 | 151.5625191 | 203.9570353 | 208.7226338 | Isml          |
| ENSMUSG00000043259  | 3.599264222 | 1.847702014  | 2.66E-21 | 8.60E-20 | 444.717586 | 358.56341  | 294.428171 | 1239.97086  | 1210.336585 | 1509.529569 | Fam13c        |
| ENSMUSG00000000392  | 0.247374733 | -2.015229944 | 3.07E-21 | 9.87E-20 | 1439.0559  | 871.358205 | 1197.58969 | 274.7070659 | 309.2869596 | 283.9023502 | Fpp           |
| ENSMUSG00000014956  | 4.336319672 | 2.116471116  | 3.64E-21 | 1.17E-19 | 5934.6486  | 6531.74826 | 6337.0384  | 18252.86363 | 34176.6878  | 29107.40995 | Pap1cb        |
| ENSMUSG00000022419  | 0.326367302 | -1.615431572 | 3.66E-21 | 1.17E-19 | 2769.62223 | 3174.02295 | 3504.56486 | 1107.353655 | 1141.393362 | 833.9013283 | Deptor        |
| ENSMUSG00000021675  | 20.66379881 | 4.369033597  | 4.43E-21 | 1.42E-19 | 17.0355527 | 13.7531171 | 18.6346944 | 244.3945621 | 569.739136  | 203.7765998 | F2rl2         |
| ENSMUSG00000026335  | 2.8106463   | 1.490901912  | 4.88E-21 | 1.56E-19 | 10328.028  | 7728.26945 | 7407.91218 | 25176.42896 | 22505.17465 | 23897.25776 | Pam           |
| ENSMUSG00000026854  | 2.132300092 | 1.092410492  | 5.15E-21 | 1.64E-19 | 507.480149 | 518.688988 | 566.494709 | 1165.136866 | 1081.068041 | 1145.501469 | Usp20         |
| ENSMUSG00000079557  | 5.870030778 | 2.553380608  | 5.63E-21 | 1.79E-19 | 1371.8103  | 1722.08673 | 2053.54332 | 6673.48717  | 13867.16331 | 9667.518009 | 2-Mar         |
| ENSMUSG00000059187  | 11.70075138 | 3.548529272  | 6.49E-21 | 2.06E-19 | 16.1389447 | 9.82365508 | 24.8462592 | 234.9219046 | 190.5514085 | 158.2730872 |               |
| ENSMUSG00000027763  | 2.086713325 | 1.061232415  | 6.52E-21 | 2.07E-19 | 10212.3655 | 10285.3669 | 9798.12231 | 18933.9477  | 23272.168   | 21014.70916 | Mbnl1         |
| ENSMUSG00000039997  | 0.219181318 | -2.189803262 | 6.78E-21 | 2.14E-19 | 1772.59409 | 2857.70126 | 2698.30375 | 545.6250688 | 634.8521802 | 425.3589219 | Ifi203        |
| ENSMUSG00000025610  | 2.158392671 | 1.109957355  | 7.12E-21 | 2.25E-19 | 1424.71017 | 1551.15514 | 1639.85311 | 3141.133209 | 3194.369341 | 3622.475284 | Map3k7cl      |
| ENSMUSG00000041390  | 0.375976832 | -1.411284329 | 7.63E-21 | 2.40E-19 | 1337.73919 | 1545.26094 | 1798.86916 | 573.0957754 | 601.3381133 | 584.6212159 | Mpfic         |
| ENSMUSG00000027208  | 0.340899028 | -1.552583608 | 7.82E-21 | 2.46E-19 | 1176.34974 | 918.51175  | 931.734719 | 329.6484791 | 379.1877275 | 323.470622  | Fgf7          |
| ENSMUSG00000038168  | 4.488905452 | 2.16636371   | 9.00E-21 | 2.83E-19 | 287.81118  | 209.243853 | 156.531433 | 1057.148571 | 917.3278863 | 970.411866  | P3h2          |
| ENSMUSG00000090841  | 2.53360723  | 1.341192889  | 9.08E-21 | 2.84E-19 | 20216.718  | 23887.1997 | 27826.568  | 57941.40379 | 62255.73054 | 62037.11495 | Myf6          |
| ENSMUSG00000001128  | 0.244831636 | -2.030138108 | 9.12E-21 | 2.85E-19 | 937.852007 | 1336.01709 | 1362.81732 | 323.9648846 | 329.3953997 | 236.420424  | Cfp           |
| ENSMUSG00000064267  | 0.130699097 | -2.93567892  | 9.26E-21 | 2.89E-19 | 233.11809  | 470.553078 | 366.482323 | 48.31055297 | 45.96214879 | 45.50351258 | Hvcn1         |
| ENSMUSG00000029658  | 14.17603777 | 3.825382448  | 9.73E-21 | 3.03E-19 | 12.5525125 | 33.4004273 | 24.8462592 | 220.7129185 | 330.3529444 | 447.1214714 | Wdr95         |
| ENSMUSG00000015354  | 2.115294313 | 1.080858407  | 1.03E-20 | 3.20E-19 | 1433.67625 | 1248.58656 | 1436.11378 | 2955.469123 | 2712.724323 | 3041.810895 | Pcolce2       |
| ENSMUSG00000008154  | 2.660317731 | 1.411598562  | 1.05E-20 | 3.25E-19 | 2193.99987 | 2258.4583  | 2431.20646 | 5475.196003 | 7287.873217 | 5546.4825   | Slc48a1       |
| ENSMUSG00000031343  | 2.828225556 | 1.499897182  | 1.14E-20 | 3.53E-19 | 1066.06696 | 768.209827 | 1032.36207 | 2855.058954 | 2539.408721 | 2711.415825 | Gabra3        |
| ENSMUSG00000052560  | 0.425473655 | -1.23285829  | 1.18E-20 | 3.65E-19 | 685.905148 | 666.043814 | 726.753081 | 291.7578493 | 313.1171386 | 278.9563162 | Cpne8         |
| ENSMUSG00000045555  | 5.388885998 | 2.429987067  | 1.20E-20 | 3.70E-19 | 68.1422108 | 52.0653719 | 40.9963277 | 336.2793393 | 268.1125346 | 272.0318687 | Mettl24       |
| ENSMUSG00000047945  | 0.157644935 | -2.665249279 | 1.37E-20 | 4.22E-19 | 805.154017 | 1280.02226 | 1576.49515 | 169.5605683 | 246.089005  | 161.2407076 | Marksl1       |
| ENSMUSG00000057967  | 0.191750668 | -2.382696491 | 1.49E-20 | 4.59E-19 | 207.116457 | 180.755253 | 204.981638 | 39.78516127 | 43.08951449 | 30.66541065 | Fgf18         |
| ENSMUSG00000026177  | 0.442767803 | -1.175377779 | 1.50E-20 | 4.62E-19 | 837.431907 | 910.652826 | 790.111042 | 374.1699691 | 373.4424589 | 376.8877889 | Slc11a1       |
| ENSMUSG00000038305  | 2.357239444 | 1.237098312  | 1.59E-20 | 4.87E-19 | 470.719219 | 465.641251 | 431.082597 | 1090.302872 | 971.9079398 | 1164.296398 | Spats2l       |
| ENSMUSG00000074918  | 3.052156888 | 1.609829122  | 1.61E-20 | 4.93E-19 | 599.830777 | 581.56038  | 793.837981 | 1860.429922 | 2265.550917 | 1894.331013 | Inafm2        |
| ENSMUSG00000078716  | 2.59251809  | 1.743454056  | 1.71E-20 | 5.22E-19 | 226.841833 | 204.332026 | 321.07021  | 614.7754682 | 550.5882407 | 549.9989781 | Tmem8b        |
| ENSMUSG00000052384  | 0.234909202 | -2.089824864 | 1.88E-20 | 5.72E-19 | 632.108666 | 898.86439  | 826.138118 | 230.1855759 | 158.9524312 | 164.208328  | Nrros         |
| ENSMUSG00000027326  | 17.56043941 | 4.13425704   | 1.96E-20 | 5.97E-19 | 56.4863063 | 58.9419305 | 45.9655795 | 339.1211365 | 1129.902824 | 1370.051411 | Kn1l          |
| ENSMUSG00000017309  | 0.366888511 | -1.446586368 | 1.97E-20 | 5.98E-19 | 869.709796 | 794.733696 | 767.749409 | 305.0195697 | 331.3104892 | 256.2045599 | Cdb30lg       |
| ENSMUSG00000062209  | 10.36074048 | 3.373055211  | 2.09E-20 | 6.32E-19 | 9.86268841 | 14.7354826 | 16.1500685 | 157.2461136 | 118.735551  | 140.4673649 | Erb4          |
| ENSMUSG00000027669  | 2.265953637 | 1.180118343  | 2.16E-20 | 6.52E-19 | 1521.54384 | 1220.09796 | 1251.00915 | 3037.881242 | 2954.983149 | 3059.616617 | Gnb4          |
| ENSMUSG00000027318  | 2.557361868 | 1.354656317  | 2.22E-20 | 6.68E-19 | 1067.86017 | 967.630025 | 1293.24779 | 2782.119491 | 2698.361152 | 3024.99438  | Adam33        |
| ENSMUSG00000052727  | 2.614862695 | 1.386735193  | 2.27E-20 | 6.83E-19 | 5376.9584  | 5201.62536 | 7088.63775 | 15735.03128 | 15622.34286 | 14830.18827 | Map1b         |
| ENSMUSG00000036585  | 2.413956347 | 1.271399587  | 2.70E-20 | 8.09E-19 | 1385.25942 | 1238.76291 | 1135.47404 | 2754.648785 | 2969.346321 | 3357.367863 | Fgf1          |
| ENSMUSG00000041219  | 0.247847719 | -2.012474112 | 2.90E-20 | 8.68E-19 | 264.499371 | 331.057176 | 255.91647  | 71.99219658 | 67.98567842 | 71.22288925 | Ahrgap11a     |
| ENSMUSG00000027314  | 0.273394263 | -1.870945126 | 3.89E-20 | 1.16E-18 | 642.867963 | 541.283395 | 452.201917 | 132.6172042 | 152.2496179 | 163.2191212 | Dil4          |
| ENSMUSG00000030921  | 0.226912156 | -2.139794194 | 3.89E-20 | 1.16E-18 | 907.367334 | 1574.73191 | 1422.44834 | 284.1797233 | 328.4378549 | 273.0210755 | Trim30a       |
| ENSMUSG00000042834  | 0.298412298 | -1.744621102 | 4.08E-20 | 1.22E-18 | 3275.30916 | 4035.55751 | 5251.25688 | 1275.966958 | 1297.473159 | 1174.188466 | Nrep          |
| ENSMUSG00000028381  | 0.355607304 | -1.491643139 | 4.20E-20 | 1.25E-18 | 1635.41306 | 1886.14177 | 2177.77462 | 677.2950073 | 747.8424626 | 600.4485246 | Ugcg          |
| ENSMUSG00000030223  | 0.133079709 | -2.909637482 | 4.29E-20 | 1.27E-18 | 199.046984 | 308.462769 | 229.827897 | 36.94336403 | 38.30179066 | 22.75175629 | Ptpro         |
| ENSMUSG00000090394  | 2.379833278 | 1.250860508  | 4.28E-20 | 1.27E-18 | 1274.97663 | 1180.80334 | 1530.52957 | 3014.199599 | 3300.65681  | 3164.472538 | 4930523C07Rik |
| ENSMUSG00000048572  | 2.013992781 | 1.010058512  | 4.36E-20 | 1.29E-18 | 1017.65012 | 1196.52119 | 1103.17391 | 2216.601842 | 2187.989791 | 2275.175629 | Tmem252       |
| ENSMUSG00000019254  | 2.193552156 | 1.13326901   | 4.40E-20 | 1.30E-18 | 3361.38353 | 3801.75451 | 4196.53318 | 7901.143575 | 8795.04688  | 8274.373227 | Ppp1r12c      |
| ENSMUSG00000036594  | 0.13527185  | -2.886066446 | 4.52E-20 | 1.33E-18 | 7517.16178 | 15788.5784 | 10506.2407 | 2086.826435 | 1046.59643  | 1440.285094 | H2-A          |
| ENSMUSG00000051323  | 0.201833775 | -2.308760478 | 5.35E-20 | 1.57E-18 | 690.388189 | 724.003379 | 1173.98575 | 186.6113517 | 183.8485952 | 151.3486397 | Pcdh19        |
| ENSMUSG00000031409  | 259.7218555 | 8.020823611  | 5.72E-20 | 1.68E-18 | 0          | 0.98236551 | 2.48462592 | 215.029324  | 263.3248108 | 322.4814152 | Tceal6        |
| ENSMUSG00000069662  | 0.162807927 | -2.618757148 | 6.03E-20 | 1.77E-18 | 5282.81455 | 7470.88969 | 12286.4752 | 1177.45132  | 1510.048097 | 1388.84634  | Marcks        |
| ENSMUSG000000004035 | 5.659492079 | 2.500672582  | 6.71E-20 | 1.96E-18 | 32.2778893 | 36.3475238 | 57.1463961 | 230.1855759 | 241.3012811 | 230.4851833 | Gstm7         |
| ENSMUSG00000054555  | 0.103220547 | -3.276197914 | 7.16E-20 | 2.09E-18 | 969.233288 | 513.77716  | 841.045873 | 94.72657445 | 105.425729  | 42.5358929  | Adam12        |
| ENSMUSG00000001348  | 0.292271672 | -1.77461809  | 8.40E-20 | 2.45E-18 | 1824.59736 | 1222.06269 | 1739.23814 | 474.580138  | 507.4987262 | 416.4560608 | Acp5          |
| ENSMUSG000000202014 | 0.127126889 | -2.975658885 | 9.60E-20 | 2.79E-18 | 289.604396 | 664.079083 | 541.64845  | 61.57227339 | 65.11304412 | 63.30923489 | Epsti1        |
| ENSMUSG00000041482  | 0.27272049  | -1.873703472 | 1.00E-19 | 2.91E-18 | 795.291329 | 596.295863 | 746.630088 | 194.1894776 | 229.8107439 | 159.262294  | Piez2         |
| ENSMUSG00000078139  | 63.51031168 | 5.988918945  | 1.02E-19 | 2.95E-18 | 1.79321607 | 5.89419305 | 1.24231296 | 106.0937634 | 272.9002584 | 200.8089794 | AK157302      |
| ENSMUSG00000026043  | 0.273248524 | -1.87171439  | 1.05E-19 | 3.02E-18 | 238328.279 | 138522.378 | 178440.864 | 45410.97252 | 52800.93351 | 53521.03365 | Col3a1        |
| ENSMUSG00000071714  | 0.299057466 | -1.741505359 | 1.20E-19 | 3.46E-18 | 657.213691 | 601.207691 | 581.402465 | 157.2461136 | 225.9805649 | 167.1759484 | Csf2rb2       |
| ENSMUSG00000052632  | 3.213434727 | 1.684116168  | 1.20E-19 | 3.47E-18 | 822.18957  | 662.114352 | 555.313893 | 2173.027618 | 1930.410249 | 2459.168093 | Asap2         |
| ENSMUSG00000089417  | 23.42907252 | 4.550227938  | 1.21E-19 | 3.47E-18 | 10.7592964 | 9.82365508 | 24.8462592 | 259.550814  | 211.6173934 | 572.7507344 | Gm22009       |
| ENSMUSG00000014361  | 2.068000923 | 1.048236829  | 1.21E-19 | 3.49E-18 | 1406.77801 | 1516.77234 | 1591.4029  | 2898.633178 | 3374.387757 | 3059.616617 | Mertk         |
| ENSMUSG00000000938  | 0.44729068  | -1.160715398 | 1.28E-19 | 3.67E-18 | 717.28643  | 669.973276 | 691.968318 | 296.494178  | 306.4143253 | 327.4274492 | Hoxa10        |
| ENSMUSG00000025477  | 2.353695548 | 1.234927719  | 1.31E-19 | 3.76E-18 | 2015.57487 | 2253.54647 | 2662.27667 | 5199.541671 | 549         |             |               |

|                    |             |              |          |          |            |            |            |             |             |             |               |
|--------------------|-------------|--------------|----------|----------|------------|------------|------------|-------------|-------------|-------------|---------------|
| ENSMUSG00000039131 | 5.304036618 | 2.407090736  | 4.22E-19 | 1.17E-17 | 26.8982411 | 29.4709652 | 32.3001369 | 156.2988478 | 150.3345283 | 161.2407076 | Gipc2         |
| ENSMUSG00000033209 | 2.394037103 | 1.259445511  | 4.56E-19 | 1.26E-17 | 2023.64434 | 1806.57017 | 2448.59884 | 5032.8229   | 4930.398002 | 5060.781964 | Ttc28         |
| ENSMUSG00000040811 | 2.492400118 | 1.31753569   | 4.72E-19 | 1.31E-17 | 598.934169 | 620.855001 | 490.713619 | 1334.697434 | 1377.906919 | 1557.011496 | Hml2          |
| ENSMUSG00000034926 | 3.773374828 | 1.915855417  | 5.24E-19 | 1.45E-17 | 200.8402   | 221.032239 | 213.677829 | 1004.101689 | 770.823537  | 622.2110741 | Hcr24         |
| ENSMUSG00000054618 | 14.094798   | 3.817090897  | 5.30E-19 | 1.46E-17 | 13.4491206 | 8.84128957 | 8.69619071 | 147.7734561 | 105.3299243 | 188.9384979 | Gm9951        |
| ENSMUSG00000024593 | 0.104021986 | -3.265039609 | 5.39E-19 | 1.48E-17 | 157.803015 | 128.689881 | 140.381364 | 8.5253917   | 19.15089533 | 16.81651552 | Megf10        |
| ENSMUSG00000029408 | 2.87032429  | 1.521213742  | 5.54E-19 | 1.52E-17 | 191.87412  | 158.160847 | 207.466264 | 494.4727186 | 551.5457855 | 550.9881849 | Abcb9         |
| ENSMUSG00000098424 | 4.704063428 | 2.233907513  | 5.62E-19 | 1.54E-17 | 49.313442  | 37.3298893 | 59.631022  | 242.5000306 | 220.2352963 | 220.5931153 | Gm27202       |
| ENSMUSG00000036052 | 3.056497816 | 1.611879536  | 5.63E-19 | 1.54E-17 | 802.464193 | 1239.74527 | 964.034856 | 2912.842164 | 3010.520746 | 3264.382424 | Dnajb5        |
| ENSMUSG00000037613 | 0.249072473 | -2.005362509 | 5.70E-19 | 1.56E-17 | 270.775627 | 265.238687 | 331.69756  | 71.99219658 | 82.34884991 | 61.33082123 | Tnfrsf23      |
| ENSMUSG00000019942 | 0.151732211 | -2.720400708 | 5.73E-19 | 1.56E-17 | 186.494472 | 252.467935 | 247.220279 | 30.31250382 | 46.91969356 | 26.70858347 | Cdk1          |
| ENSMUSG00000056091 | 6.067245477 | 2.601041683  | 5.83E-19 | 1.59E-17 | 234.911306 | 328.11008  | 249.704905 | 976.6309825 | 2018.504368 | 1936.866905 | St3gal5       |
| ENSMUSG00000076431 | 0.19581669  | -2.352424358 | 5.93E-19 | 1.61E-17 | 769.289696 | 800.627889 | 1360.33269 | 180.9277572 | 221.192841  | 171.1327756 | Sox4          |
| ENSMUSG00000010660 | 2.19399775  | 1.133562046  | 6.66E-19 | 1.80E-17 | 941.483439 | 791.786599 | 782.657164 | 1901.162349 | 1882.533011 | 1741.003959 | Pclcd1        |
| ENSMUSG00000001506 | 0.257920695 | -1.955000559 | 6.84E-19 | 1.85E-17 | 118375.573 | 90885.5097 | 163292.1   | 28180.20863 | 35172.53436 | 32735.82047 | Col1a1        |
| ENSMUSG00000029322 | 0.167613042 | -2.576793689 | 6.92E-19 | 1.87E-17 | 624.935802 | 1356.64677 | 1130.50479 | 155.3515821 | 174.2731475 | 191.9061183 | Plac8         |
| ENSMUSG00000040483 | 0.273587118 | -1.869927795 | 7.26E-19 | 1.96E-17 | 617.762938 | 836.975412 | 757.810905 | 179.9804914 | 248.0040945 | 177.0680163 | Xaf1          |
| ENSMUSG00000047963 | 3.385941321 | 1.759556971  | 7.45E-19 | 2.01E-17 | 489.547988 | 761.333268 | 588.856343 | 2246.914346 | 2191.81997  | 1789.475092 | Stbd1         |
| ENSMUSG00000071984 | 0.302728986 | -1.723901274 | 7.63E-19 | 2.05E-17 | 4730.504   | 3169.11113 | 4156.77916 | 1140.507956 | 1077.237862 | 1432.371439 | Fndc1         |
| ENSMUSG00000043857 | 11.05538329 | 3.466771379  | 7.69E-19 | 2.07E-17 | 8.96608037 | 11.7883861 | 12.4231296 | 100.4101689 | 122.5657301 | 140.4673649 | Mrat5b        |
| ENSMUSG00000024521 | 0.10923903  | -3.194439685 | 8.74E-19 | 2.34E-17 | 175.735175 | 216.120412 | 282.005042 | 14.20898617 | 28.72634299 | 30.66541065 | Pmaip1        |
| ENSMUSG00000024206 | 3.20112041  | 1.678576945  | 9.33E-19 | 2.50E-17 | 258.223115 | 230.855894 | 300.639736 | 952.9493389 | 696.1350452 | 874.4588069 | Rfx2          |
| ENSMUSG00000074039 | 3.877292886 | 1.955049719  | 9.47E-19 | 2.53E-17 | 123.731909 | 92.3423577 | 80.7503423 | 420.5859905 | 358.1217426 | 378.8662025 | A930520004Rik |
| ENSMUSG00000023972 | 0.194545223 | -2.361822539 | 9.50E-19 | 2.53E-17 | 333.53819  | 262.291591 | 355.301506 | 54.94141318 | 80.43376038 | 49.46033976 | Ptk7          |
| ENSMUSG00000050675 | 16.66760318 | 4.058974753  | 1.05E-18 | 2.80E-17 | 36.7609295 | 35.3651203 | 14.9077555 | 529.5215512 | 702.8378586 | 232.4635969 | Gp1ba         |
| ENSMUSG00000047344 | 8.448040372 | 3.446671354  | 1.08E-18 | 2.88E-17 | 78.9015073 | 39.2946203 | 31.057824  | 348.593794  | 443.3432269 | 481.7437092 | Langl3        |
| ENSMUSG00000003644 | 0.25002252  | -1.999870048 | 1.10E-18 | 2.93E-17 | 365.816079 | 456.799961 | 424.871032 | 130.7226727 | 94.79693188 | 86.06099118 | Rps6ka1       |
| ENSMUSG00000028121 | 2.526607934 | 1.336893438  | 1.21E-18 | 3.22E-17 | 575.62236  | 467.605982 | 505.621374 | 1262.705237 | 1189.2706   | 1463.03685  | Bcar3         |
| ENSMUSG00000027995 | 0.295140956 | -1.760523962 | 1.37E-18 | 3.62E-17 | 500.307285 | 622.819732 | 508.106    | 192.2949461 | 141.7166254 | 147.3918125 | Tlr2          |
| ENSMUSG00000098557 | 0.432641152 | -1.208757197 | 1.41E-18 | 3.73E-17 | 1893.63617 | 1928.38349 | 2251.07108 | 875.2735479 | 958.5023112 | 792.3546429 | Kctd12        |
| ENSMUSG00000059325 | 0.278465449 | -1.844429759 | 1.65E-18 | 4.35E-17 | 312.916205 | 301.586211 | 344.12069  | 91.88477721 | 102.45729   | 72.21209604 | Hoxp          |
| ENSMUSG00000032122 | 0.219833843 | -2.185514588 | 1.65E-18 | 4.36E-17 | 320.089069 | 381.157817 | 366.482323 | 101.3574347 | 74.68849178 | 58.36230091 | Slc37a2       |
| ENSMUSG00000021190 | 0.354503538 | -1.496128068 | 1.78E-18 | 4.68E-17 | 4258.88818 | 5778.27392 | 6197.89935 | 1839.590076 | 2078.829688 | 1835.967812 | Lgmn          |
| ENSMUSG00000024451 | 0.452040824 | -1.145475026 | 1.78E-18 | 4.68E-17 | 1803.07876 | 1654.30351 | 1437.35609 | 736.0254834 | 741.1396492 | 736.9590624 | Aras3         |
| ENSMUSG00000025780 | 0.448440233 | -1.157012374 | 1.82E-18 | 4.77E-17 | 2348.21645 | 1877.30048 | 2188.95543 | 916.9532406 | 951.794978  | 1008.001724 | Itih5         |
| ENSMUSG00000039316 | 0.36578586  | -1.450928787 | 1.83E-18 | 4.79E-17 | 656.317083 | 758.386172 | 831.10737  | 251.972688  | 264.2823555 | 304.6756929 | Rftn1         |
| ENSMUSG00000034855 | 0.051795523 | -4.271028796 | 1.86E-18 | 4.87E-17 | 206.219849 | 698.461876 | 665.879746 | 15.15625191 | 31.59897729 | 34.62223783 | Cxcl10        |
| ENSMUSG00000033544 | 0.127619406 | -2.970080366 | 1.91E-18 | 4.97E-17 | 1442.64233 | 577.630918 | 1228.64752 | 170.507834  | 129.2685435 | 114.7479882 | Angptl1       |
| ENSMUSG00000059022 | 0.136628679 | -2.871667752 | 1.91E-18 | 4.98E-17 | 131.801381 | 145.390095 | 160.258372 | 20.83984638 | 24.89616393 | 13.84889513 | Kcp           |
| ENSMUSG00000040951 | 3.141577735 | 1.651489278  | 2.14E-18 | 5.58E-17 | 2217.31168 | 3404.87885 | 3079.69383 | 9051.124188 | 10188.27631 | 8093.68998  | Hspb1         |
| ENSMUSG00000024397 | 0.063102235 | -3.986165081 | 2.16E-18 | 5.60E-17 | 330.848366 | 891.005515 | 868.376758 | 30.31250382 | 71.81585748 | 29.67620385 | Aif1          |
| ENSMUSG00000026749 | 0.425072777 | -1.234218228 | 2.17E-18 | 5.63E-17 | 622.245978 | 668.008545 | 734.206959 | 280.3906604 | 279.6030718 | 299.7296589 | Nek6          |
| ENSMUSG00000054728 | 4.03709762  | 2.013318473  | 2.19E-18 | 5.66E-17 | 300.363692 | 366.422334 | 544.133076 | 1765.703348 | 1488.024567 | 1623.288351 | Phactr1       |
| ENSMUSG00000090231 | 0.21307534  | -2.23056446  | 2.27E-18 | 5.86E-17 | 416.922737 | 681.761662 | 715.572265 | 137.3535329 | 135.013821  | 113.7587814 | Cfb           |
| ENSMUSG00000061100 | 0.253986777 | -1.977174703 | 2.33E-18 | 6.01E-17 | 1129.72613 | 1966.69575 | 1467.1716  | 431.9531795 | 361.9519217 | 365.0173074 | Retnla        |
| ENSMUSG00000042286 | 0.458710964 | -1.124342704 | 2.46E-18 | 6.35E-17 | 6821.39395 | 575.53843  | 5341.94572 | 2743.281596 | 2650.483914 | 2831.109848 | Stab1         |
| ENSMUSG00000040714 | 6.33088227  | 2.662406567  | 2.49E-18 | 6.41E-17 | 43.0371858 | 21.6120412 | 38.5117017 | 195.1367434 | 224.0654573 | 233.4528037 | Klc3          |
| ENSMUSG00000040345 | 0.162905021 | -2.617897026 | 2.50E-18 | 6.41E-17 | 278.8451   | 486.270926 | 327.970621 | 73.88672807 | 52.66496215 | 51.43875335 | Arhgap9       |
| ENSMUSG00000046442 | 2.489517734 | 1.315866292  | 2.51E-18 | 6.43E-17 | 406.163441 | 350.704486 | 308.093614 | 858.2227645 | 885.728909  | 914.0270787 | Ppm1e         |
| ENSMUSG00000007867 | 2.141307743 | 1.098492151  | 2.55E-18 | 6.53E-17 | 395.404144 | 432.240823 | 433.567223 | 876.2208136 | 861.7902898 | 960.5197981 | Ifft43        |
| ENSMUSG00000040829 | 2.021824949 | -2.172506458 | 2.58E-18 | 6.61E-17 | 312.916205 | 392.946203 | 249.704905 | 69.15039935 | 67.98567842 | 75.17971643 | Zmynd15       |
| ENSMUSG00000066705 | 0.317534735 | -1.655013678 | 2.60E-18 | 6.64E-17 | 2129.44409 | 2337.04754 | 3176.59424 | 712.3438398 | 854.1299317 | 859.620705  | Fxyd6         |
| ENSMUSG00000030054 | 104.7709997 | 6.711095628  | 2.65E-18 | 6.75E-17 | 537964822  | 11.7883861 | 17.3923814 | 561.7285865 | 2228.206672 | 791.3654361 | Gp9           |
| ENSMUSG00000031827 | 0.181668237 | -2.460621896 | 2.75E-18 | 6.99E-17 | 1174.55653 | 2159.23939 | 2234.92101 | 412.0605988 | 338.0133026 | 261.1530939 | Cotl1         |
| ENSMUSG00000037902 | 0.219465113 | -2.187936471 | 2.76E-18 | 7.03E-17 | 2605.54296 | 4287.04308 | 5095.96776 | 952.0020732 | 934.563692  | 743.8835099 | Sirpa         |
| ENSMUSG00000042759 | 0.196887215 | -2.344558669 | 2.84E-18 | 7.21E-17 | 266.292587 | 293.727287 | 211.193203 | 62.51953913 | 48.83478309 | 40.5574786  | Apobr         |
| ENSMUSG00000079419 | 0.177197315 | -2.496719373 | 2.85E-18 | 7.23E-17 | 311.122989 | 466.623616 | 275.793477 | 73.88672807 | 57.45268599 | 55.3958053  | Ma46c         |
| ENSMUSG00000031340 | 4.360231057 | 2.124404588  | 2.90E-18 | 7.35E-17 | 234.014698 | 153.249019 | 155.28912  | 823.1739319 | 922.1156101 | 626.1679013 | Gabre         |
| ENSMUSG00000037921 | 0.204751271 | -2.288055688 | 2.93E-18 | 7.40E-17 | 319.192461 | 449.923402 | 326.728308 | 67.25586786 | 94.79693188 | 62.32002809 | Ddx60         |
| ENSMUSG00000048234 | 0.378464668 | -1.401769474 | 2.98E-18 | 7.53E-17 | 624.935802 | 794.733696 | 663.39512  | 266.1816742 | 273.8290532 | 248.2990956 | Rnf149        |
| ENSMUSG00000032875 | 2.88001318  | 1.526075414  | 3.05E-18 | 7.69E-17 | 2554.4363  | 2006.97273 | 1687.061   | 6493.506678 | 5697.39136  | 5813.568335 | Arhgef17      |
| ENSMUSG00000001750 | 0.39539176  | -1.338645288 | 3.23E-18 | 8.14E-17 | 2220.0015  | 3034.52705 | 2861.04675 | 1039.150522 | 1118.412287 | 1050.537616 | Tcira1        |
| ENSMUSG00000021904 | 0.438376877 | -1.189756394 | 3.25E-18 | 8.15E-17 | 1964.46821 | 2073.77359 | 1764.0844  | 754.0235326 | 860.832745  | 929.8543874 | Scmg3g        |
| ENSMUSG00000041362 | 0.293430252 | -1.76891048  | 3.25E-18 | 8.15E-17 | 416.026129 | 519.671354 | 407.478651 | 118.4082181 | 153.2071626 | 122.6616426 | Shtn1         |
| ENSMUSG00000056004 | 6.49019223  | 2.698261209  | 3.27E-18 | 8.19E-17 | 17.9321607 | 19.6473102 | 21.1193203 | 122.197281  | 129.2685435 | 127.6076766 | 9330182L06Rik |
| ENSMUSG00000039037 | 0.165159637 | -2.598066944 | 3.83E-18 | 9.58E-17 | 181.114823 | 158.160847 | 239.766401 | 30.31250382 | 36.38670112 | 28.68699706 | St6galnac5    |
| ENSMUSG00000079243 | 3.896634632 | 1.962228664  | 3.98E-18 | 9.94E-17 | 652.730651 | 973.524218 | 819.926553 | 2417.42218  | 3189.581617 | 3923.194149 | Kirp1         |
| ENSMUSG00000037946 | 0.167810432 | -2.575095691 | 4.25E-18 | 1.06E-16 | 2          |            |            |             |             |             |               |

|                    |             |              |          |          |            |            |            |             |             |             |            |
|--------------------|-------------|--------------|----------|----------|------------|------------|------------|-------------|-------------|-------------|------------|
| ENSMUSG00000000957 | 0.167999736 | -2.573469132 | 7.19E-18 | 1.75E-16 | 7131.62033 | 8212.57564 | 15502.8234 | 1357.431812 | 2057.763703 | 1766.723336 | Mmp14      |
| ENSMUSG00000058135 | 2.00377439  | 1.002720081  | 7.96E-18 | 1.93E-16 | 4225.71368 | 3628.85818 | 4325.73372 | 8457.188567 | 7607.693169 | 8339.013283 | Gstm1      |
| ENSMUSG00000043832 | 0.130130144 | -2.941972906 | 7.97E-18 | 1.93E-16 | 403.473617 | 516.724257 | 326.728308 | 55.88867892 | 75.64603655 | 30.66541065 | Clec4a3    |
| ENSMUSG00000032006 | 3.275900821 | 1.71189168   | 8.04E-18 | 1.95E-16 | 924.402886 | 813.39864  | 559.040832 | 2487.519845 | 2371.838386 | 2674.815174 | Pdgfd      |
| ENSMUSG00000005397 | 0.382834017 | -1.385209067 | 8.26E-18 | 2.00E-16 | 10463.4158 | 7462.0484  | 7883.71804 | 3073.877341 | 3442.373435 | 3365.281517 | Nid1       |
| ENSMUSG00000047139 | 10.18373709 | 3.348195174  | 8.78E-18 | 2.12E-16 | 639.28153  | 1238.76291 | 730.48002  | 4239.014206 | 13555.00371 | 8772.285859 | Cd24a      |
| ENSMUSG00000019831 | 0.401699831 | -1.315810239 | 9.71E-18 | 2.34E-16 | 487.754772 | 546.195222 | 552.829267 | 208.3984638 | 198.2117667 | 230.4851833 | Rab32      |
| ENSMUSG00000022096 | 2.173689071 | 1.120145589  | 9.77E-18 | 2.35E-16 | 1013.16708 | 970.577121 | 990.123428 | 1869.90258  | 2267.466007 | 2327.603589 | Hr         |
| ENSMUSG00000041481 | 0.095906982 | -3.382220339 | 1.08E-17 | 2.59E-16 | 257.326507 | 654.255428 | 367.724636 | 43.57422425 | 28.72634299 | 50.44954655 | Serpina3g  |
| ENSMUSG00000031497 | 0.36051986  | -1.471849359 | 1.08E-17 | 2.59E-16 | 449.200627 | 477.429637 | 549.102328 | 163.8769738 | 195.3391324 | 172.1219824 | Tnfrsf13b  |
| ENSMUSG00000013033 | 2.105204357 | 1.073960286  | 1.10E-17 | 2.64E-16 | 2144.68642 | 1810.49963 | 2302.00591 | 4386.787663 | 4299.376001 | 4482.095989 | Adgrl1     |
| ENSMUSG00000031673 | 0.190972574 | -2.38856263  | 1.15E-17 | 2.75E-16 | 2682.65125 | 1374.32935 | 1612.52222 | 288.9160521 | 362.9094665 | 431.2941627 | Cdh11      |
| ENSMUSG00000024290 | 2.437043025 | 1.285131721  | 1.17E-17 | 2.79E-16 | 4031.14973 | 4433.41554 | 5636.3739  | 11352.03268 | 11667.68298 | 11335.32067 | Rock1      |
| ENSMUSG00000026463 | 2.235864247 | 1.160832596  | 1.22E-17 | 2.92E-16 | 4605.87549 | 3729.05947 | 3503.32254 | 8694.952268 | 8701.209293 | 9079.929173 | Atg2b4     |
| ENSMUSG00000029563 | 3.046668514 | 1.607232539  | 1.25E-17 | 2.98E-16 | 479.6853   | 438.135016 | 670.848998 | 1610.351766 | 1524.411268 | 1696.489654 | Foxp2      |
| ENSMUSG00000028599 | 0.271478649 | -1.881089357 | 1.26E-17 | 3.00E-16 | 1245.38856 | 1826.21748 | 1416.23677 | 483.1055297 | 418.4470629 | 316.5461744 | Tnfrsf1b   |
| ENSMUSG00000015647 | 2.15305169  | 1.106382956  | 1.28E-17 | 3.05E-16 | 4448.69608 | 3817.47236 | 3438.72227 | 8090.596723 | 8414.903408 | 8704.03059  | Lama5a     |
| ENSMUSG00000001493 | 0.290053387 | -1.785609628 | 1.31E-17 | 3.10E-16 | 362.229647 | 360.528141 | 493.198245 | 112.7246236 | 121.6081853 | 117.7156086 | Meox1      |
| ENSMUSG00000040447 | 0.45061622  | -1.150028852 | 1.31E-17 | 3.10E-16 | 1153.03794 | 1251.53366 | 1156.59337 | 483.1055297 | 597.5079343 | 524.2796014 | Spns2      |
| ENSMUSG00000097767 | 0.179842466 | -2.475194375 | 1.39E-17 | 3.29E-16 | 179.321607 | 138.613537 | 186.346944 | 29.36523808 | 34.47161159 | 26.70858347 | Miat       |
| ENSMUSG00000074971 | 7.073859078 | 2.822497479  | 1.40E-17 | 3.31E-16 | 582.795224 | 339.898466 | 995.09268  | 4949.463515 | 4578.021528 | 4025.082449 | Fibin      |
| ENSMUSG00000048371 | 2.96157986  | 1.566366989  | 1.44E-17 | 3.38E-16 | 365.816079 | 247.556108 | 337.909125 | 1000.312626 | 917.3278863 | 899.1889768 | Pdp2       |
| ENSMUSG00000015947 | 0.053660718 | -4.219989842 | 1.51E-17 | 3.54E-16 | 346.98731  | 774.10402  | 757.810905 | 25.5761751  | 61.28286505 | 13.84889513 | Fcg1r      |
| ENSMUSG00000034881 | 2.424297557 | 1.277566785  | 1.60E-17 | 3.75E-16 | 260.912939 | 315.339328 | 334.182186 | 742.6564337 | 715.2859405 | 743.8835099 | Tbxa2r     |
| ENSMUSG00000040268 | 2.008735943 | 1.006287928  | 1.75E-17 | 4.10E-16 | 1549.33869 | 1478.46009 | 1395.11745 | 2730.967141 | 3252.779572 | 2904.311151 | Plekha1    |
| ENSMUSG00000032224 | 3.012260337 | 1.590846461  | 1.75E-17 | 4.11E-16 | 213.392713 | 214.155681 | 252.189531 | 717.0801686 | 560.1636884 | 766.6352662 | Fam81a     |
| ENSMUSG00000032380 | 3.219415768 | 1.686798904  | 1.96E-17 | 4.57E-16 | 138.974246 | 189.596543 | 168.954562 | 465.1074805 | 532.3948901 | 602.4269382 | Dapk2      |
| ENSMUSG00000018819 | 0.370062327 | -1.434159742 | 2.12E-17 | 4.95E-16 | 3538.91192 | 3565.00443 | 4425.11876 | 1652.031458 | 1412.378531 | 1200.897049 | Lsp1       |
| ENSMUSG00000091345 | 0.136912115 | -2.868677984 | 2.15E-17 | 5.00E-16 | 834.742083 | 354.633948 | 469.594299 | 80.51758828 | 80.43760338 | 66.27685527 | Col6a5     |
| ENSMUSG00000033192 | 0.248634828 | -2.007899695 | 2.25E-17 | 5.23E-16 | 314.709421 | 437.152651 | 290.701232 | 86.20118275 | 85.22148421 | 88.03940477 | Lpcat2     |
| ENSMUSG00000024300 | 0.13498575  | -2.889120979 | 2.31E-17 | 5.36E-16 | 556.793591 | 922.441212 | 609.975663 | 136.4062672 | 89.05166328 | 56.38478732 | Myo1f      |
| ENSMUSG00000032690 | 0.096099765 | -3.37932329  | 2.31E-17 | 5.36E-16 | 426.785426 | 944.053253 | 719.299203 | 58.73047616 | 103.4148348 | 38.57906501 | Oas2       |
| ENSMUSG00000041577 | 2.542998715 | 1.346530733  | 2.40E-17 | 5.55E-16 | 5302.53993 | 3715.30635 | 4129.44828 | 11729.04445 | 10592.36021 | 11116.70596 | Prep1      |
| ENSMUSG00000035472 | 30.7292607  | 4.941541153  | 2.48E-17 | 5.73E-16 | 8.06947233 | 5.89419305 | 7.45387776 | 81.46485402 | 293.0086985 | 283.9023502 | Slc25a21   |
| ENSMUSG00000057614 | 2.22240024  | 1.15211866   | 2.50E-17 | 5.78E-16 | 1049.0314  | 937.957718 | 1013.72737 | 2263.965129 | 217.8414344 | 2003.143376 | Gnai1      |
| ENSMUSG00000032243 | 0.181248934 | -2.463955582 | 2.54E-17 | 5.85E-16 | 1189.79887 | 645.414138 | 602.521785 | 137.3535329 | 143.631715  | 161.2407076 | Itga11     |
| ENSMUSG00000035279 | 0.236825378 | -2.078104408 | 2.83E-17 | 6.52E-16 | 1281.25288 | 857.605088 | 1566.55664 | 268.0762057 | 338.0133026 | 214.0726619 | Ssc5d      |
| ENSMUSG00000015134 | 0.272041031 | -1.878103828 | 2.85E-17 | 6.56E-16 | 556.793591 | 377.228355 | 503.136748 | 146.8261904 | 129.2685435 | 117.479882  | Aldh1a3    |
| ENSMUSG00000015340 | 0.098340608 | -3.346068918 | 2.94E-17 | 6.75E-16 | 1431.88304 | 3549.28658 | 2618.79572 | 376.0645006 | 234.5984678 | 136.5105377 | Cybb       |
| ENSMUSG00000039943 | 2.764082759 | 1.466800812  | 3.21E-17 | 7.35E-16 | 2676.37499 | 2060.02047 | 1776.50753 | 6429.092608 | 5868.771874 | 5712.669242 | Ptcb4      |
| ENSMUSG00000036353 | 1.534060184 | 3.861022554  | 3.26E-17 | 7.46E-16 | 105.799748 | 98.1427247 | 98.1427238 | 680.1368045 | 3009.563201 | 1160.339571 | P2ry12     |
| ENSMUSG00000022053 | 0.400581509 | -1.319832268 | 3.36E-17 | 7.68E-16 | 923.506278 | 731.862303 | 764.02247  | 317.3340244 | 308.3294148 | 344.2439647 | Ebf2       |
| ENSMUSG00000021701 | 0.357445799 | -1.4842036   | 3.38E-17 | 7.70E-16 | 1233.32266 | 1368.43515 | 1376.48276 | 406.3770044 | 582.187218  | 433.2725763 | Plk2       |
| ENSMUSG00000079547 | 0.190111215 | -2.39508445  | 3.41E-17 | 7.77E-16 | 597.140953 | 1251.53366 | 941.673223 | 153.4570506 | 176.188237  | 200.8089794 | H2-DMB1    |
| ENSMUSG00000039242 | 2.264411526 | 1.179136172  | 3.47E-17 | 7.90E-16 | 1104.6211  | 1225.99215 | 941.673223 | 2387.109676 | 2379.498745 | 2649.095797 | B3galnt2   |
| ENSMUSG00000030761 | 0.294868439 | -1.761856682 | 3.54E-17 | 8.02E-16 | 1343.11884 | 923.423577 | 873.34601  | 331.5430106 | 286.3058852 | 308.6325201 | Myo7a      |
| ENSMUSG00000022901 | 0.137772179 | -2.859643509 | 3.57E-17 | 8.07E-16 | 180.218215 | 301.882049 | 401.882049 | 42.6695585  | 41.17442496 | 24.73016988 | Cd86       |
| ENSMUSG00000048546 | 2.762696613 | 1.466077141  | 3.60E-17 | 8.13E-16 | 1264.21733 | 1215.18613 | 1141.68561 | 2722.44175  | 3210.647602 | 4073.553582 | Tob2       |
| ENSMUSG00000030452 | 3.139126111 | 1.650362989  | 3.66E-17 | 8.26E-16 | 205.32324  | 146.372461 | 160.258372 | 546.5723346 | 583.1447628 | 480.7545024 | Bicd1      |
| ENSMUSG00000066361 | 0.232545818 | -2.104413103 | 3.67E-17 | 8.27E-16 | 477.892084 | 317.304059 | 445.990352 | 77.67579105 | 111.0751929 | 99.90988631 | Serpina3c  |
| ENSMUSG00000036144 | 0.399261406 | -1.32459447  | 3.98E-17 | 8.95E-16 | 1774.38731 | 1387.1001  | 1373.99813 | 588.2520273 | 568.7815913 | 654.8548984 | Meox2      |
| ENSMUSG00000026821 | 0.411380604 | -1.281454321 | 4.78E-17 | 1.07E-15 | 949.507911 | 907.705729 | 920.553903 | 399.7461442 | 423.2347868 | 319.5137948 | Rallds     |
| ENSMUSG00000002325 | 0.423991651 | -1.237892239 | 4.87E-17 | 1.09E-15 | 1030.20263 | 1306.54613 | 1298.21704 | 495.4199844 | 528.5647111 | 516.3659471 | Irf9       |
| ENSMUSG00000028989 | 6.646181016 | 2.732525587  | 4.98E-17 | 1.12E-15 | 97.730276  | 55.9948339 | 57.1463961 | 555.0977263 | 536.2250692 | 316.5461744 | Angptl7    |
| ENSMUSG00000038366 | 0.439018241 | -1.187647212 | 5.00E-17 | 1.12E-15 | 2739.13755 | 3142.58726 | 3680.9733  | 1395.322442 | 1411.420986 | 1389.835547 | Lasp1      |
| ENSMUSG00000027435 | 0.475324149 | -1.073016396 | 5.03E-17 | 1.12E-15 | 4284.88981 | 3406.84358 | 3625.06921 | 1866.113517 | 1759.967281 | 1753.863648 | Cd93       |
| ENSMUSG00000018339 | 0.299168725 | -1.740968728 | 5.11E-17 | 1.14E-15 | 6522.82347 | 8037.71458 | 9567.0521  | 2002.519784 | 2799.28494  | 2221.758462 | Gpr3       |
| ENSMUSG00000039058 | 0.213236308 | -2.229474989 | 5.24E-17 | 1.17E-15 | 219.668969 | 164.05504  | 190.073883 | 37.89062978 | 46.91969356 | 37.58985821 | Aks        |
| ENSMUSG00000013707 | 0.208185377 | -2.264059361 | 6.13E-17 | 1.36E-15 | 224.152009 | 312.392231 | 352.81688  | 71.04493083 | 62.24040982 | 51.43875335 | Tnfaiip8l2 |
| ENSMUSG00000040420 | 29.32422923 | 4.874012183  | 7.07E-17 | 1.57E-15 | 2.68982411 | 2.94709652 | 3.72693888 | 79.57032253 | 92.88184235 | 97.93147272 | Cdh18      |
| ENSMUSG00000036295 | 10.49692606 | 3.391895003  | 7.69E-17 | 1.70E-15 | 43.9337938 | 27.5062342 | 40.9963277 | 278.4961289 | 632.9370906 | 268.0750415 | Lrrn3      |
| ENSMUSG00000033777 | 0.157715617 | -2.66460257  | 7.83E-17 | 1.73E-15 | 270.775627 | 393.928569 | 327.970621 | 70.09766509 | 54.58005169 | 31.65461744 | Tlrl3      |
| ENSMUSG00000057880 | 2.745372625 | 1.457001977  | 8.52E-17 | 1.88E-15 | 446.510802 | 322.215886 | 344.12069  | 1075.14662  | 925.9457892 | 1058.451271 | Abat       |
| ENSMUSG00000033032 | 0.453822856 | -1.139798824 | 8.59E-17 | 1.90E-15 | 862.536932 | 843.851971 | 768.991722 | 355.2246542 | 411.7442496 | 357.103653  | Afap1l1    |
| ENSMUSG00000071713 | 0.251421602 | -1.991819483 | 8.70E-17 | 1.92E-15 | 806.050625 | 1225.99215 | 1140.4433  | 281.3379261 | 315.0322282 | 200.8089794 | Csf2rb     |
| ENSMUSG00000046470 | 0.430837338 | -1.214784812 | 9.10E-17 | 2.00E-15 | 1262.42412 | 1572.76718 | 1560.34508 | 620.4590626 | 680.8143289 | 591.5456635 | Sox18      |
| ENSMUSG00000031950 | 3.869533866 | 1.952159786  | 1.06E-16 | 2.33E-15 | 762.116831 | 873.322936 | 836.076622 | 2229.863562 | 4253.413853 | 3079.400753 | Gabaparl2  |
| ENSMUSG00000028469 | 2.74504779  | 1.168324183  | 1.12E-16 | 2        |            |            |            |             |             |             |            |

|                     |             |              |          |          |            |            |            |             |             |              |               |
|---------------------|-------------|--------------|----------|----------|------------|------------|------------|-------------|-------------|--------------|---------------|
| ENSMUSG000000110071 | 5.128978452 | 2.35867151   | 2.10E-16 | 4.50E-15 | 27.7948491 | 31.4356962 | 22.3616333 | 141.1425959 | 135.0138121 | 145.4133989  | Gm45512       |
| ENSMUSG00000028238  | 0.06636209  | -3.913496876 | 2.16E-16 | 4.61E-15 | 283.32814  | 252.467935 | 203.739325 | 7.578125956 | 31.59897729 | 9.892067951  | Atp6v0d2      |
| ENSMUSG00000028832  | 0.211008006 | -2.244630355 | 2.34E-16 | 5.00E-15 | 448.304019 | 702.391338 | 822.411179 | 112.7246236 | 161.8250655 | 141.4565717  | Stmn1         |
| ENSMUSG00000056529  | 0.144988839 | -2.78598625  | 2.43E-16 | 5.19E-15 | 40.783793  | 659.167256 | 541.64845  | 106.0937634 | 82.3488494  | 43.52509899  | Ptatr         |
| ENSMUSG00000045136  | 0.217332977 | -2.202020995 | 2.45E-16 | 5.23E-15 | 378.368592 | 413.575879 | 665.879746 | 99.46290317 | 112.9902824 | 103.8667135  | Tubb2b        |
| ENSMUSG00000031480  | 0.348481013 | -1.520848044 | 2.50E-16 | 5.33E-15 | 486.858164 | 441.082113 | 376.420827 | 161.0351766 | 136.9289016 | 157.2838804  | Thsd1         |
| ENSMUSG00000059089  | 0.068505432 | -3.867637811 | 2.96E-16 | 6.28E-15 | 193.667366 | 484.360195 | 489.471306 | 17.0507834  | 44.04705926 | 18.79492911  | Fcgr4         |
| ENSMUSG00000092741  | 3.650050051 | 1.867916247  | 2.98E-16 | 6.32E-15 | 132.697989 | 130.654613 | 89.4465331 | 362.8027801 | 460.5790327 | 470.8624345  | Mir3074-1     |
| ENSMUSG00000064325  | 5.025923448 | 2.329388697  | 3.09E-16 | 6.55E-15 | 166.769095 | 162.090309 | 83.2349683 | 563.623118  | 782.3140742 | 734.9806488  | Hhip          |
| ENSMUSG00000034041  | 0.396193497 | -1.335722894 | 3.17E-16 | 6.71E-15 | 478.788692 | 590.40167  | 554.07158  | 218.818387  | 225.9805649 | 197.841359   | Lyl1          |
| ENSMUSG00000027692  | 2.840392766 | 1.506090438  | 3.52E-16 | 7.12E-15 | 260.912939 | 302.568576 | 200.012386 | 746.4454066 | 721.0312091 | 707.2828585  | Tnik          |
| ENSMUSG00000028463  | 4.714801955 | 2.237197172  | 3.58E-16 | 7.54E-15 | 42.1405777 | 37.3298893 | 26.0885721 | 165.7715053 | 168.5278789 | 169.154362   | Car9          |
| ENSMUSG00000024781  | 0.430276453 | 1.216664204  | 3.77E-16 | 7.93E-15 | 2347.31984 | 2229.9697  | 2079.63189 | 1120.615376 | 898.1769909 | 845.7718098  | Lipa          |
| ENSMUSG00000036777  | 2.496250846 | 1.319762917  | 4.06E-16 | 8.55E-15 | 396.300752 | 383.122548 | 318.032118 | 808.01768   | 927.8608787 | 1008.990931  | Anln          |
| ENSMUSG00000020922  | 6.369963934 | 2.671285204  | 4.18E-16 | 8.77E-15 | 555.896983 | 668.008545 | 755.326279 | 2426.894837 | 6563.011829 | 3613.572423  | Lsm12         |
| ENSMUSG000000021242 | 0.437017149 | -1.194238202 | 4.24E-16 | 8.89E-15 | 5920.30287 | 7078.92585 | 8153.29995 | 3031.250382 | 3232.671132 | 2978.50166   | Npc2          |
| ENSMUSG00000026475  | 0.143524695 | -2.800629107 | 4.25E-16 | 8.89E-15 | 356.849999 | 358.56341  | 524.256069 | 56.83594467 | 86.17902898 | 34.62223783  | Rgs16         |
| ENSMUSG00000038112  | 0.137112249 | -2.866570637 | 4.25E-16 | 8.89E-15 | 273.465451 | 171.913964 | 298.15511  | 42.6269585  | 37.34424589 | 21.76254949  | AW551984      |
| ENSMUSG00000002111  | 0.162136392 | -2.624477259 | 4.26E-16 | 8.91E-15 | 545.137687 | 985.312604 | 868.376758 | 184.7168202 | 112.9902842 | 91.00702515  | Sp1           |
| ENSMUSG00000075602  | 0.337299679 | -1.567897148 | 4.37E-16 | 9.12E-15 | 5921.19948 | 9806.95486 | 8266.35043 | 2605.928063 | 2754.856293 | 2732.189168  | Ly6a          |
| ENSMUSG00000025888  | 0.301806045 | -1.728306392 | 4.40E-16 | 9.17E-15 | 376.575376 | 485.288561 | 337.909125 | 128.8281412 | 115.8629167 | 117.7156086  | Casp1         |
| ENSMUSG00000030607  | 0.228675637 | -2.128625425 | 4.62E-16 | 9.62E-15 | 1595.0657  | 1583.5732  | 1252.25146 | 359.0137172 | 438.555503  | 215.6470813  | Acan          |
| ENSMUSG00000004266  | 0.163688344 | -2.610976499 | 4.90E-16 | 1.02E-14 | 663.489947 | 1109.09066 | 829.865057 | 197.9785406 | 141.7166254 | 86.06099138  | Ptpn6         |
| ENSMUSG00000048330  | 3.244445083 | 1.697971747  | 4.96E-16 | 1.03E-14 | 127.318341 | 105.113109 | 89.4465331 | 383.6426265 | 320.7774968 | 345.2331715  | Ric3          |
| ENSMUSG00000027559  | 0.320018011 | -1.64377499  | 5.02E-16 | 1.04E-14 | 39571.7957 | 27029.7869 | 34554.935  | 11144.58148 | 12720.98622 | 8506.189231  | Car3          |
| ENSMUSG00000039349  | 4.60317126  | -1.11929975  | 5.12E-16 | 1.06E-14 | 1367.0706  | 1781.02867 | 2150.44373 | 862.9590392 | 869.4506479 | 845.7718098  | C130074G19Rik |
| ENSMUSG00000024302  | 2.94557451  | -1.558549047 | 5.16E-16 | 1.07E-14 | 731.632158 | 956.824004 | 641.033487 | 2461.94367  | 2455.144781 | 1948.737386  | Dtna          |
| ENSMUSG00000029468  | 0.359219854 | -1.477061007 | 5.17E-16 | 1.07E-14 | 703.837309 | 612.996077 | 500.652123 | 221.6601842 | 213.532489  | 218.6147017  | P2rx7         |
| ENSMUSG00000019647  | 0.442353104 | -1.776729648 | 5.23E-16 | 1.08E-14 | 712.803389 | 606.119518 | 685.756753 | 274.7070659 | 303.541691  | 308.6325201  | Seama6        |
| ENSMUSG00000024053  | 0.325765919 | -1.618092417 | 5.25E-16 | 1.08E-14 | 1009.58065 | 1149.36764 | 1115.59704 | 453.7402916 | 321.7350415 | 290.8267978  | Emilin2       |
| ENSMUSG00000034957  | 0.400876515 | -1.318770192 | 5.39E-16 | 1.11E-14 | 3405.7775  | 2326.24152 | 3077.2092  | 1140.507956 | 1240.020473 | 1006.023311  | Cebpa         |
| ENSMUSG00000021313  | 3.605208544 | -1.850082715 | 5.47E-16 | 1.12E-14 | 692.181405 | 534.406836 | 381.390078 | 2189.131135 | 173.0732907 | 1843.881466  | Ryr2          |
| ENSMUSG00000023015  | 0.27742765  | -1.849816512 | 5.52E-16 | 1.13E-14 | 263.602763 | 291.762556 | 284.489668 | 61.57227339 | 76.60358132 | 94.96385233  | Racgap1       |
| ENSMUSG00000038179  | 0.080540384 | -3.634143843 | 5.55E-16 | 1.14E-14 | 232.255401 | 416.522975 | 193.800822 | 35.04883255 | 19.1508953  | 12.85968834  | Slamf7        |
| ENSMUSG000000239706 | 0.468558817 | -1.093697939 | 5.58E-16 | 1.14E-14 | 893.918213 | 865.464012 | 911.857712 | 378.9062978 | 407.9140705 | 464.92171937 | Ldb2          |
| ENSMUSG00000027834  | 3.661759361 | 1.872536985  | 5.70E-16 | 1.16E-14 | 454.580275 | 353.651583 | 260.885721 | 1500.468939 | 1309.92124  | 1112.857645  | Serpin1       |
| ENSMUSG00000035969  | 2.117325608 | 1.082243148  | 5.85E-16 | 1.19E-14 | 1619.27411 | 1404.78268 | 1319.33636 | 3093.769921 | 3309.274713 | 2798.466023  | Rusc2         |
| ENSMUSG00000057596  | 0.227950389 | -2.133208223 | 6.05E-16 | 1.23E-14 | 407.060049 | 680.620586 | 614.944915 | 126.9336098 | 156.0797969 | 106.8343339  | Trim30d       |
| ENSMUSG00000029661  | 0.300798472 | -1.733130856 | 6.14E-16 | 1.25E-14 | 162261.846 | 130071.087 | 232720.002 | 49242.66246 | 55987.64249 | 52703.94884  | Col1a2        |
| ENSMUSG00000086389  | 8.808264836 | 3.138857847  | 6.42E-16 | 1.31E-14 | 18.8287688 | 12.7707516 | 7.45387776 | 123.1445468 | 119.630958  | 109.8019543  | Gm15998       |
| ENSMUSG00000023947  | 0.271322633 | -1.881918698 | 6.95E-16 | 1.41E-14 | 261.809547 | 365.439969 | 329.212934 | 98.51563742 | 73.7094702  | 87.05019797  | Nfkbie        |
| ENSMUSG00000041740  | 2.873381761 | 1.522749684  | 7.01E-16 | 1.42E-14 | 3242.13466 | 3951.07407 | 3502.08023 | 10609.37634 | 12291.04462 | 7830.56099   | Rnf10         |
| ENSMUSG00000060572  | 0.210997566 | -2.244701737 | 7.08E-16 | 1.43E-14 | 1188.90226 | 900.82917  | 1893.28495 | 253.8672195 | 315.0322282 | 271.0426619  | Mfap2         |
| ENSMUSG00000015968  | 2.90759436  | 1.539826012  | 7.33E-16 | 1.48E-14 | 91.4540198 | 108.060206 | 93.1734719 | 269.9707372 | 301.6266014 | 279.945523   | Cacna1d       |
| ENSMUSG00000060477  | 2.061482656 | 1.043682323  | 8.10E-16 | 1.64E-14 | 653.627259 | 784.910041 | 767.749409 | 1512.783394 | 1429.614336 | 1602.515008  | Irak2         |
| ENSMUSG00000025877  | 0.128486506 | -2.960311241 | 8.46E-16 | 1.71E-14 | 210.702889 | 379.193086 | 239.766401 | 46.41602148 | 38.30179066 | 21.76254949  | Hcl3          |
| ENSMUSG00000089929  | 0.058189119 | -4.26817395  | 8.50E-16 | 1.71E-14 | 100.4201   | 289.797825 | 222.37402  | 17.2358058  | 6.24447566  | 8.2421a1b    |               |
| ENSMUSG00000069792  | 0.184161428 | -2.440957173 | 8.52E-16 | 1.72E-14 | 247.463818 | 409.646417 | 452.201917 | 71.99219658 | 78.51867085 | 53.41716694  | Wfdc17        |
| ENSMUSG00000037725  | 0.193772124 | -2.367567055 | 8.83E-16 | 1.78E-14 | 132.697989 | 147.354826 | 152.804494 | 28.41797233 | 33.51406683 | 21.76254949  | Ckap2         |
| ENSMUSG00000032484  | 0.016863757 | -5.889930187 | 8.85E-16 | 1.78E-14 | 262.706155 | 781.962949 | 94.4157849 | 5.683594467 | 10.53299243 | 2.967620385  | Ngp           |
| ENSMUSG00000026980  | 3.121441574 | 1.642212462  | 9.00E-16 | 1.81E-14 | 106.696356 | 121.813323 | 106.838914 | 406.3770044 | 334.1831235 | 306.6541065  | Ly75          |
| ENSMUSG00000026888  | 2.678751577 | 1.421560794  | 9.34E-16 | 1.87E-14 | 285.121356 | 280.956535 | 323.001369 | 713.2911056 | 721.9887539 | 943.7032826  | Grb14         |
| ENSMUSG00000026825  | 0.334530858 | -1.5797888   | 9.69E-16 | 1.94E-14 | 1760.04158 | 1123.82614 | 1385.17895 | 462.2656833 | 518.0317186 | 448.1106782  | Dnm1          |
| ENSMUSG00000020102  | 2.423427961 | 1.277049197  | 1.05E-15 | 2.10E-14 | 519.136053 | 389.999107 | 442.263413 | 1185.029446 | 1015.954997 | 1076.256993  | Slc16a7       |
| ENSMUSG00000008398  | 0.440753799 | -1.181955089 | 1.08E-15 | 2.16E-14 | 2435.18743 | 2673.99891 | 3256.10227 | 1192.607572 | 1190.228145 | 1302.785349  | Elk3          |
| ENSMUSG00000003153  | 3.956405617 | 1.984190341  | 1.11E-15 | 2.21E-14 | 178.424999 | 142.442999 | 151.562181 | 646.9825035 | 775.6112608 | 448.1106782  | Slc2a3        |
| ENSMUSG00000024164  | 0.280780885 | -2.10239782  | 1.21E-15 | 2.42E-14 | 20372.7278 | 17761.1684 | 13393.376  | 5640.020243 | 3150.322282 | 3208.986843  | C3            |
| ENSMUSG00000020312  | 0.378092864 | -1.403187476 | 1.24E-15 | 2.47E-14 | 763.910048 | 640.502311 | 849.742064 | 262.3926112 | 270.9851689 | 318.524588   | Shc2          |
| ENSMUSG00000034116  | 0.11133852  | -3.166975281 | 1.27E-15 | 2.51E-14 | 324.572109 | 657.202525 | 534.194572 | 80.51758828 | 59.36777552 | 28.68699706  | Vav1          |
| ENSMUSG00000046714  | 2.422443379 | 1.276462945  | 1.27E-15 | 2.51E-14 | 404.370225 | 407.681686 | 539.163824 | 1050.517711 | 1094.473668 | 1120.771299  | Foxc2         |
| ENSMUSG00000024990  | 3.430457896 | 1.77840116   | 1.32E-15 | 2.62E-14 | 732.528766 | 481.359099 | 870.861384 | 2596.455406 | 2303.852708 | 2245.499425  | Rbp4          |
| ENSMUSG00000030214  | 0.213000778 | -2.231069393 | 1.37E-15 | 2.71E-14 | 640.178138 | 1099.267   | 648.487365 | 195.1367434 | 182.8910504 | 130.575297   | Ptbd1         |
| ENSMUSG00000031838  | 0.380702308 | -1.393264778 | 1.42E-15 | 2.81E-14 | 1283.0461  | 1878.28285 | 1728.05733 | 620.4590626 | 632.9370906 | 607.3729722  | Ifi30         |
| ENSMUSG00000021281  | 0.241724839 | -2.04856237  | 1.44E-15 | 2.84E-14 | 802.464193 | 1373.34698 | 1219.95133 | 284.1797233 | 325.5652206 | 210.7010474  | Tnfrap2       |
| ENSMUSG00000033849  | 0.320668765 | -1.640844259 | 1.65E-15 | 3.25E-14 | 581.898616 | 454.83523  | 582.644778 | 166.718771  | 205.8721248 | 146.4026057  | B3galt2       |
| ENSMUSG00000026304  | 15.80745782 | 3.982533464  | 1.66E-15 | 3.26E-14 | 6.27625626 | 5.89419305 | 6.2115648  | 128.8281412 | 78.51867085 | 83.09337079  | Rab17         |
| ENSMUSG00000022367  | 0.174111268 | -2.521918522 | 1.70E-15 | 3.34E-14 | 153.319974 | 111.007302 | 134.1698   | 21.78711212 | 25.85370869 | 21.76254949  | Has2          |
| ENSMUSG00000040296  | 0.462988364 | -1.110952159 | 1.71E-15 | 3.34E-14 | 1085.7923  |            |            |             |             |              |               |

|                    |             |              |          |          |            |             |            |             |             |             |            |
|--------------------|-------------|--------------|----------|----------|------------|-------------|------------|-------------|-------------|-------------|------------|
| ENSMUSG00000079018 | 0.429133942 | -1.220500081 | 2.89E-15 | 5.53E-14 | 3141.71456 | 4001.17471  | 2975.33954 | 1335.6447   | 1527.283902 | 1479.853366 | Ly6c1      |
| ENSMUSG00000074923 | 12.2850795  | 3.618835288  | 3.16E-15 | 6.04E-14 | 8.06947233 | 5.89419305  | 9.93850367 | 113.6718893 | 73.73094702 | 102.8775067 | Pak6       |
| ENSMUSG00000068122 | 0.02876607  | -5.119488032 | 3.17E-15 | 6.05E-14 | 208.909673 | 86.4481647  | 137.896738 | 5.683594467 | 6.702813365 | 0           | Agtr2      |
| ENSMUSG0000002679  | 3.06534845  | 1.61605108   | 3.51E-15 | 6.69E-14 | 93.2472359 | 120.830957  | 139.139051 | 369.4336403 | 357.1641979 | 350.1792055 | Mpv17l     |
| ENSMUSG00000040990 | 0.426442345 | -1.229577393 | 3.57E-15 | 6.80E-14 | 995.234921 | 847.781433  | 1077.08534 | 430.058648  | 441.4281373 | 372.9309618 | Sh3kbp1    |
| ENSMUSG00000029084 | 0.26553184  | -1.91304323  | 4.14E-15 | 7.84E-14 | 346.98731  | 488.235657  | 551.586954 | 141.1425959 | 120.6506406 | 105.8451271 | Cd38       |
| ENSMUSG00000020607 | 21.16761834 | 4.40378705   | 4.25E-15 | 8.02E-14 | 2.68982411 | 20.6296757  | 4.96925184 | 197.0312748 | 179.0613278 | 226.5283561 | Fam84a     |
| ENSMUSG00000039232 | 4.781142298 | 2.257355344  | 4.46E-15 | 8.41E-14 | 108.489572 | 150.301923  | 124.231296 | 461.3184176 | 856.0450212 | 513.3983267 | Stx11      |
| ENSMUSG00000032744 | 2.429974177 | 1.280940983  | 4.49E-15 | 8.45E-14 | 1604.92839 | 1324.2287   | 1841.10781 | 4040.0884   | 3411.732003 | 4134.884404 | Heyl       |
| ENSMUSG00000109866 | 0.284916695 | -1.811387935 | 4.52E-15 | 8.50E-14 | 213.392713 | 195.490736  | 193.800822 | 55.88867892 | 49.79232786 | 66.27685527 | Gm45714    |
| ENSMUSG00000070390 | 0.071245516 | -3.811056969 | 4.58E-15 | 8.60E-14 | 80.6947233 | 120.830957  | 95.6580979 | 11.36718893 | 4.787723832 | 4.946033976 | Nlrp1b     |
| ENSMUSG00000021613 | 13.14820626 | 3.716794089  | 4.59E-15 | 8.61E-14 | 14.3457286 | 6.87655855  | 3.72693888 | 122.197281  | 123.5232749 | 93.97464554 | Hapln1     |
| ENSMUSG00000074577 | 0.213809217 | -2.225604051 | 4.62E-15 | 8.66E-14 | 151.526758 | 135.56644   | 150.319868 | 27.47070659 | 38.30179066 | 27.69779026 | Ripor3     |
| ENSMUSG00000083457 | 1193.20092  | 10.22062128  | 4.74E-15 | 8.88E-14 | 0          | 0           | 0          | 84.30665126 | 367.6971903 | 226.5283561 | Cyp4b1-ps2 |
| ENSMUSG00000035064 | 2.027426164 | 1.019649375  | 4.89E-15 | 9.15E-14 | 1819.21771 | 1723.0691   | 1610.0376  | 3498.252394 | 3867.523312 | 3083.35758  | Eef2k      |
| ENSMUSG00000061780 | 0.268435642 | -1.897351856 | 4.99E-15 | 9.32E-14 | 35971.0178 | 25374.5011  | 41976.5126 | 7483.399381 | 12011.44155 | 8240.092603 | Cfd        |
| ENSMUSG00000026348 | 69.71729731 | 6.123444737  | 5.77E-15 | 1.08E-13 | 1.79321607 | 0.98236551  | 3.72693888 | 74.83399381 | 243.2163707 | 115.737195  | Acsmd      |
| ENSMUSG00000039257 | 5.846013007 | 2.547453039  | 6.42E-15 | 1.19E-13 | 30.4846733 | 33.4004273  | 27.3308851 | 171.4550997 | 134.0562673 | 229.4959765 | Vstm2b     |
| ENSMUSG00000029561 | 0.184822345 | -2.435788907 | 6.50E-15 | 1.21E-13 | 949.507911 | 2048.23208  | 1780.23447 | 235.8691704 | 386.8480856 | 260.1613871 | Oasl2      |
| ENSMUSG00000029417 | 0.07236387  | -3.788586566 | 6.74E-15 | 1.25E-13 | 249.257034 | 1067.83131  | 731.722333 | 40.73242701 | 70.85831272 | 36.60065142 | Cxc19      |
| ENSMUSG00000001053 | 0.356155863 | -1.489419356 | 8.18E-15 | 1.51E-13 | 285.121356 | 328.11008   | 355.301506 | 105.1464976 | 121.6081853 | 117.7156086 | N4bp3      |
| ENSMUSG00000026683 | 0.151192715 | -2.725539464 | 8.31E-15 | 1.53E-13 | 102.213316 | 109.042571  | 140.381364 | 20.83984638 | 14.3631715  | 17.80572231 | Nuf2       |
| ENSMUSG00000020520 | 0.463208293 | -1.110267011 | 8.61E-15 | 1.58E-13 | 1048.1348  | 859.569819  | 956.580979 | 434.7949767 | 414.6168839 | 477.786882  | Galt10     |
| ENSMUSG00000047686 | 0.124504527 | -3.005729891 | 9.58E-15 | 1.76E-13 | 103.109924 | 88.4128957  | 86.9619071 | 9.472657445 | 14.3631715  | 10.88127475 | Rt3        |
| ENSMUSG00000037936 | 0.457501808 | -1.128150649 | 1.07E-14 | 1.97E-13 | 1088.48216 | 949.947446  | 937.946284 | 449.0039629 | 503.6685471 | 409.5316132 | Scarb1     |
| ENSMUSG00000026928 | 0.740875494 | -2.82750743  | 1.08E-14 | 1.98E-13 | 124.628517 | 215.138067  | 228.585584 | 34.1015668  | 22.02352963 | 23.74096308 | Card9      |
| ENSMUSG00000039994 | 0.307433207 | -1.701655092 | 1.09E-14 | 2.00E-13 | 282.431532 | 377.228355  | 387.601643 | 95.67384019 | 106.2874691 | 119.6940222 | Timeless   |
| ENSMUSG00000029657 | 2.28247864  | 1.190601359  | 1.11E-14 | 2.02E-13 | 1320.70364 | 1666.0919   | 1698.24182 | 3127.871488 | 3782.301827 | 3778.769957 | Hsph1      |
| ENSMUSG00000086712 | 0.047587659 | -4.393268704 | 1.12E-14 | 2.04E-13 | 76.1126831 | 70.330165   | 75.7810905 | 5.683594467 | 1.915089533 | 2.967620385 | Alx27809   |
| ENSMUSG00000033355 | 0.168836529 | -2.566301023 | 1.12E-14 | 2.05E-13 | 431.268466 | 934.229598  | 752.841653 | 94.72657445 | 159.909976  | 102.8775067 | Rtp4       |
| ENSMUSG00000040151 | 0.493535031 | -1.018775604 | 1.16E-14 | 2.12E-13 | 110.62411  | 947.000349  | 1053.48139 | 478.369201  | 547.7156064 | 506.4738791 | Hs2st1     |
| ENSMUSG00000030748 | 0.353863711 | -1.498734274 | 1.19E-14 | 2.16E-13 | 1264.21733 | 1826.21748  | 1898.2542  | 649.8243007 | 544.8892573 | 570.7723208 | Il4ra      |
| ENSMUSG00000049001 | 0.237700204 | -2.072784951 | 1.19E-14 | 2.16E-13 | 909.16055  | 582.542746  | 534.194572 | 179.0332257 | 177.1457818 | 125.629263  | Ndnf       |
| ENSMUSG00000058818 | 0.129663813 | -2.947152188 | 1.21E-14 | 2.20E-13 | 745.081279 | 1308.51086  | 952.85404  | 187.5586174 | 141.7166254 | 60.3416145  | Pirb       |
| ENSMUSG00000027833 | 0.384322629 | -1.379610171 | 1.28E-14 | 2.32E-13 | 916.333414 | 916.547019  | 1243.55527 | 359.0137172 | 409.829216  | 412.4992366 | Shox2      |
| ENSMUSG00000024013 | 0.15223006  | -2.715674828 | 1.36E-14 | 2.46E-13 | 360.436431 | 559.948339  | 409.963277 | 105.1464976 | 51.70741739 | 45.50351258 | Fgd2       |
| ENSMUSG00000022272 | 0.465332938 | -1.103664786 | 1.37E-14 | 2.49E-13 | 1252.56143 | 1128.379797 | 976.457986 | 506.7871733 | 517.0741739 | 540.1069101 | Myo10      |
| ENSMUSG00000085442 | 13.82428562 | 3.789133025  | 1.38E-14 | 2.49E-13 | 6.27625626 | 12.7707516  | 17.3923814 | 121.2500153 | 124.4808196 | 248.2909056 | Gm3362     |
| ENSMUSG00000024640 | 0.31114403  | -1.684345528 | 1.42E-14 | 2.56E-13 | 442.92437  | 328.11008   | 490.713619 | 132.6172042 | 138.8439911 | 120.683229  | Psat1      |
| ENSMUSG00000024691 | 0.357863231 | -1.482519773 | 1.50E-14 | 2.70E-13 | 585.485048 | 651.308332  | 723.026142 | 284.1797233 | 209.7023039 | 206.7442202 | Fam111a    |
| ENSMUSG00000032076 | 0.328710247 | -1.605111664 | 1.50E-14 | 2.70E-13 | 325.468717 | 383.122548  | 386.35933  | 103.2519661 | 141.7803678 | 120.683229  | Cadm1      |
| ENSMUSG00000026536 | 0.106546717 | -3.230441953 | 1.50E-14 | 2.70E-13 | 389.127888 | 768.209827  | 750.357027 | 40.73242701 | 113.9478272 | 48.47113296 | Mnda       |
| ENSMUSG00000031934 | 0.250847281 | -1.995118792 | 1.53E-14 | 2.74E-13 | 277.051883 | 406.69932   | 447.232665 | 88.09571424 | 111.0751929 | 84.08257759 | Pannx1     |
| ENSMUSG00000069516 | 0.249729592 | -2.001561308 | 1.63E-14 | 2.93E-13 | 17317.0876 | 27439.4334  | 21113.1087 | 5163.545573 | 7390.330507 | 3895.496359 | Lyx2       |
| ENSMUSG00000042812 | 6.820407455 | 2.769857929  | 1.69E-14 | 3.02E-13 | 23.311809  | 33.4004273  | 62.115648  | 307.861367  | 235.5560125 | 255.2153531 | Foxf1      |
| ENSMUSG00000001131 | 0.155544116 | -2.684604273 | 1.72E-14 | 3.08E-13 | 1227.4564  | 1693.59814  | 2981.5511  | 244.3945621 | 427.0649658 | 246.312492  | Timp1      |
| ENSMUSG00000030849 | 3.044204843 | 1.605117298  | 1.73E-14 | 3.09E-13 | 11.963189  | 414.558244  | 424.871032 | 1093.144669 | 1290.770345 | 1730.122685 | Egfr2      |
| ENSMUSG00000022421 | 2.517907097 | 1.332225053  | 1.83E-14 | 3.26E-13 | 378.368592 | 275.062342  | 388.843956 | 875.2735479 | 847.4271183 | 899.1889768 | Nptxr      |
| ENSMUSG00000026482 | 0.4126962   | -1.276847942 | 1.84E-14 | 3.28E-13 | 1196.97173 | 1081.58442  | 1280.82466 | 556.9922577 | 405.0414362 | 506.4738791 | Rgl1       |
| ENSMUSG00000024578 | 17.74502823 | 4.149342964  | 1.89E-14 | 3.36E-13 | 6.27625626 | 0.98236551  | 9.93850367 | 89.99024572 | 110.1176481 | 94.96385233 | Il17b      |
| ENSMUSG00000020423 | 2.390617194 | 1.257383132  | 2.02E-14 | 3.59E-13 | 2760.65615 | 2685.7873   | 3718.24269 | 6686.74889  | 7877.720794 | 7336.947139 | Btg2       |
| ENSMUSG00000022661 | 2.133725581 | 1.093374643  | 2.06E-14 | 3.65E-13 | 3419.66305 | 3284.04789  | 2775.32715 | 6143.018353 | 6453.851726 | 7634.698045 | Cd200      |
| ENSMUSG00000036246 | 0.423688186 | -1.238925194 | 2.21E-14 | 3.91E-13 | 674.249244 | 738.738862  | 621.15648  | 327.7539476 | 261.4097212 | 273.0210755 | Gmp1       |
| ENSMUSG00000052353 | 0.03673956  | -4.78231523  | 2.31E-14 | 4.07E-13 | 97.730276  | 83.5010681  | 244.735653 | 2.841797233 | 7.660358132 | 4.946033976 | Cemip      |
| ENSMUSG00000031639 | 0.426876077 | -1.228110782 | 2.31E-14 | 4.07E-13 | 441.131154 | 499.041678  | 432.32491  | 211.240261  | 180.9759609 | 193.8845318 | Tlr3       |
| ENSMUSG00000022488 | 0.190410039 | -2.39281855  | 2.32E-14 | 4.09E-13 | 1492.23819 | 1379.24117  | 969.004108 | 326.8066818 | 177.1457818 | 142.4457785 | Nckap1l    |
| ENSMUSG00000060216 | 0.327624749 | -1.609883753 | 2.37E-14 | 4.17E-13 | 992.545097 | 1458.81278  | 929.07569  | 468.8965435 | 463.451667  | 368.9741346 | Arrb2      |
| ENSMUSG00000034898 | 2.734733322 | 1.451400155  | 2.38E-14 | 4.18E-13 | 875.089444 | 687.655855  | 560.283145 | 1768.545145 | 1936.155518 | 2108.988887 | Filip1     |
| ENSMUSG00000020646 | 8.779610639 | 3.13415696   | 2.44E-14 | 4.29E-13 | 74.4184671 | 54.0301029  | 49.6925184 | 233.0273731 | 688.4746871 | 646.941244  | Mboat2     |
| ENSMUSG00000031075 | 2.88926998  | 1.530705019  | 2.47E-14 | 4.33E-13 | 932.472359 | 653.273063  | 580.160152 | 2217.549108 | 1917.004622 | 2130.751437 | Ano1       |
| ENSMUSG00000038668 | 0.316788677 | -1.658407323 | 2.48E-14 | 4.35E-13 | 1471.33379 | 1497.12503  | 2392.69476 | 547.5196003 | 586.0173971 | 563.8478732 | Lpar1      |
| ENSMUSG00000028557 | 3.10937437  | 1.636624328  | 2.54E-14 | 4.45E-13 | 2054.12901 | 2404.83076  | 2336.79068 | 4931.465466 | 8632.266609 | 7565.453569 | Rnf11      |
| ENSMUSG00000046814 | 33.72428251 | 5.075715845  | 2.60E-14 | 4.54E-13 | 7.1728643  | 1.96473102  | 8.69619071 | 78.62305679 | 342.8010264 | 172.1219824 | Gchfr      |
| ENSMUSG00000023216 | 951.4887429 | 9.894042778  | 2.60E-14 | 4.54E-13 | 0          | 1.96473102  | 0          | 336.2793393 | 1148.096175 | 447.1214714 | Epb42      |
| ENSMUSG00000058794 | 11.0642966  | 3.467839831  | 2.74E-14 | 4.78E-13 | 23.311809  | 41.2593513  | 24.8462592 | 219.7656527 | 555.3759645 | 215.6470813 | Nfe2       |
| ENSMUSG00000027239 | 0.224448467 | -2.155543854 | 3.00E-14 | 5.21E-13 | 936.955399 | 567.807263  | 1251.00915 | 203.6621351 | 208.7447591 | 205.7550134 | Mdk        |
| ENSMUSG00000028211 | 2.234309359 | 1.159828953  | 3.00E-14 | 5.22E-13 | 1562.78781 | 1296.72247  | 1360.33269 | 2666.553071 | 3493.123308 | 3271.306871 | Trp53inp1  |
| ENSMUSG00000032014 | 0.355600912 | -1.491669071 | 3.07E-14 | 5.33E-13 | 1073.23982 | 1027.55432  | 1515.62181 | 468.8965435 | 422.277242  | 393         |            |

|                     |              |              |          |          |            |            |            |             |             |             |               |
|---------------------|--------------|--------------|----------|----------|------------|------------|------------|-------------|-------------|-------------|---------------|
| ENSMUSG00000045103  | 3.081115433  | 1.623452733  | 5.07E-14 | 8.64E-13 | 1984.19359 | 1487.30138 | 1105.65853 | 5089.658845 | 4477.479328 | 4544.416017 | Dmd           |
| ENSMUSG00000043895  | 0.489663216  | -1.03013827  | 5.11E-14 | 8.70E-13 | 584.58844  | 522.61845  | 534.194572 | 267.1289399 | 271.9427137 | 265.1074211 | S1pr2         |
| ENSMUSG00000032322  | 0.227335883  | -2.137102673 | 5.13E-14 | 8.72E-13 | 327.261934 | 632.643387 | 572.706274 | 106.0937634 | 128.3109987 | 113.7587814 | Pstpip1       |
| ENSMUSG00000021390  | 2.552149694  | 1.351712952  | 5.15E-14 | 8.74E-13 | 9573.98062 | 6573.00761 | 6884.89842 | 19203.91844 | 1779.05439  | 21788.26887 | Ogn           |
| ENSMUSG00000070733  | 2.070389364  | 1.049902111  | 5.32E-14 | 9.03E-13 | 2037.99007 | 1651.35642 | 1544.19501 | 3516.250443 | 3599.410777 | 3726.341997 | Fryl          |
| ENSMUSG00000034652  | 0.184595805  | -2.437558324 | 5.49E-14 | 9.29E-13 | 313.812813 | 538.336298 | 527.983008 | 117.4609523 | 75.64603655 | 61.3308213  | Cd300a        |
| ENSMUSG00000052056  | 0.404210466  | -1.306821418 | 5.48E-14 | 9.29E-13 | 620.452762 | 587.454574 | 619.914167 | 294.5996465 | 214.4900277 | 229.4950767 | 229.4950767   |
| ENSMUSG00000001657  | 0.234882694  | -2.089987675 | 5.66E-14 | 9.58E-13 | 1023.92638 | 1453.90095 | 2251.07108 | 370.3809061 | 395.4659885 | 344.2439647 | Hoxc8         |
| ENSMUSG00000090222  | 0.169949107  | -2.556825313 | 5.83E-14 | 9.85E-13 | 136.284422 | 208.261488 | 201.254699 | 21.78711212 | 40.21688019 | 30.66541065 | Ifi203-ps     |
| ENSMUSG000000046598 | 2.136608646  | 1.09532268   | 5.94E-14 | 1.00E-12 | 347.883918 | 358.56341  | 325.485995 | 732.2364205 | 662.6209784 | 812.1387788 | Bdh1          |
| ENSMUSG00000046688  | 0.324348691  | -1.62438248  | 6.49E-14 | 1.09E-12 | 369.402511 | 570.75436  | 493.198245 | 157.2461136 | 158.9524312 | 148.3810793 | Tifa          |
| ENSMUSG00000072621  | 0.110902411  | -3.172637359 | 6.55E-14 | 1.10E-12 | 78.0048992 | 93.3247232 | 89.4465331 | 8.5253917   | 13.40562373 | 6.924447566 | Sifn10-ps     |
| ENSMUSG00000020176  | 0.410860967  | -1.283277818 | 6.68E-14 | 1.12E-12 | 4486.62662 | 3453.01476 | 4763.02789 | 1505.205268 | 1917.004622 | 1796.39954  | Grb10         |
| ENSMUSG00000027555  | 0.239565191  | -2.061509795 | 6.71E-14 | 1.13E-12 | 243.877386 | 204.332026 | 180.135379 | 39.78516127 | 48.33478309 | 62.32002809 | Car13         |
| ENSMUSG00000043157  | 0.156388652  | -2.676792262 | 6.75E-14 | 1.13E-12 | 104.90314  | 139.495902 | 131.685174 | 17.0507834  | 26.81125346 | 14.83810193 | Ar11          |
| ENSMUSG00000040690  | 0.386646748  | -1.370912015 | 6.95E-14 | 1.16E-12 | 4347.65237 | 3087.57479 | 4563.0155  | 1380.16619  | 1580.906409 | 1677.694725 | Col16a1       |
| ENSMUSG00000041431  | 0.132297647  | -2.918140697 | 7.00E-14 | 1.17E-12 | 101.316708 | 127.707516 | 121.74667  | 8.5253917   | 20.1084401  | 17.80572231 | Ccnb1         |
| ENSMUSG00000019979  | 0.480559309  | -1.0572136   | 7.22E-14 | 1.21E-12 | 719.976254 | 691.585317 | 791.353355 | 364.6973116 | 373.4424589 | 319.5137948 | Apaf1         |
| ENSMUSG00000025372  | 0.369037082  | -1.438162304 | 7.30E-14 | 1.22E-12 | 1202.35138 | 1053.09582 | 1196.34738 | 369.4336403 | 536.2250692 | 367.9849278 | Baiap2        |
| ENSMUSG00000049872  | 0.209464161  | 1.021098863  | 7.69E-14 | 1.28E-12 | 753.829144 | 469.570713 | 468.351986 | 1027.783333 | 1018.827631 | 1025.807447 | Fam26e        |
| ENSMUSG00000026278  | 0.400204472  | -1.321190805 | 7.76E-14 | 1.29E-12 | 475.20226  | 505.918236 | 590.098656 | 184.7168202 | 232.6833782 | 210.7010474 | Bok           |
| ENSMUSG00000026896  | 0.377315138  | -1.406158113 | 7.87E-14 | 1.31E-12 | 590.864696 | 789.821868 | 575.1909   | 265.2344084 | 233.640923  | 239.3880444 | Ifih1         |
| ENSMUSG00000018143  | 2.163816038  | 1.11357785   | 8.15E-14 | 1.35E-12 | 1075.03304 | 1081.58442 | 1080.81227 | 1928.633056 | 2599.734041 | 2476.973815 | Mafk          |
| ENSMUSG00000023926  | 813.1170532  | 9.667319242  | 8.47E-14 | 1.40E-12 | 0.89660804 | 0          | 0          | 101.3574347 | 418.4470629 | 380.8446161 | Rhag          |
| ENSMUSG00000020160  | 2.4669899    | 1.302751809  | 8.56E-14 | 1.42E-12 | 190.977512 | 184.684715 | 202.497012 | 533.3106141 | 410.7867048 | 480.7545024 | Meis1         |
| ENSMUSG00000030986  | 2.090970939  | 1.064173011  | 8.68E-14 | 1.43E-12 | 455.476883 | 457.782327 | 375.178514 | 956.7384019 | 888.6015433 | 853.6854632 | Dhx32         |
| ENSMUSG00000030077  | 0.203493089  | -2.296948298 | 8.96E-14 | 1.48E-12 | 340.711054 | 327.127714 | 241.008714 | 43.57422425 | 86.17902898 | 55.39558053 | Ch11          |
| ENSMUSG00000036139  | 0.231165123  | -2.229956684 | 9.36E-14 | 1.54E-12 | 486.858164 | 612.996077 | 969.004108 | 159.1406451 | 168.5278789 | 112.7695746 | Hoxc9         |
| ENSMUSG00000075585  | 2.050185902  | 1.035754733  | 9.97E-14 | 1.64E-12 | 436.648114 | 484.306195 | 496.925184 | 871.4844849 | 984.3560199 | 1048.559203 | G330403L08Rik |
| ENSMUSG00000012889  | 0.093788054  | -3.41445202  | 1.00E-13 | 1.65E-12 | 66.3489947 | 95.2894542 | 85.7195942 | 7.578125956 | 5.745268599 | 9.892067951 | Podnl1        |
| ENSMUSG00000014329  | 0.367575797  | -1.443886321 | 1.00E-13 | 1.65E-12 | 4038.3226  | 4051.27535 | 5730.78968 | 1431.31854  | 1713.047587 | 1934.888491 | Bicc1         |
| ENSMUSG00000036523  | 0.192103767  | -2.380042282 | 1.01E-13 | 1.65E-12 | 163.182663 | 225.944067 | 142.86599  | 26.52344084 | 39.25933542 | 36.60065142 | Greb1         |
| ENSMUSG00000020407  | 0.190838537  | -2.389575561 | 1.04E-13 | 1.71E-12 | 181.114823 | 219.067508 | 124.231296 | 34.1015668  | 31.59897729 | 34.62223783 | Upp1          |
| ENSMUSG00000039953  | 0.2028618974 | 1.020497916  | 1.14E-13 | 1.87E-12 | 3453.73416 | 2629.79246 | 2803.90035 | 6074.815219 | 5771.122307 | 6187.488504 | C1stn1        |
| ENSMUSG00000027490  | 0.270515646  | -1.886216056 | 1.20E-13 | 1.97E-12 | 268.085803 | 354.633948 | 377.66314  | 69.15039935 | 10.2450138  | 93.97464554 | E2f1          |
| ENSMUSG00000017830  | 0.198730026  | -2.331118229 | 1.21E-13 | 1.98E-12 | 216.082537 | 448.941037 | 393.813208 | 67.25586786 | 73.73094702 | 69.24447566 | Dhx58         |
| ENSMUSG00000038357  | 0.011447944  | -6.448767642 | 1.32E-13 | 2.16E-12 | 78.0048992 | 248.538473 | 94.5175849 | 0           | 3.830179066 | 0.989206795 | Kamp          |
| ENSMUSG00000078532  | 0.182738926  | -2.452144112 | 1.32E-13 | 2.16E-12 | 128.214949 | 139.495902 | 105.96602  | 26.52344084 | 24.89616393 | 16.81651552 | Nkain1        |
| ENSMUSG00000064225  | 6.120684885  | 2.613693095  | 1.34E-13 | 2.17E-12 | 137.18103  | 71.7126821 | 114.292792 | 943.4766815 | 619.5314639 | 415.466854  | Paqr9         |
| ENSMUSG00000038178  | 0.330632256  | -1.596700615 | 1.36E-13 | 2.21E-12 | 655.420475 | 791.786599 | 734.206959 | 305.9668355 | 226.9381096 | 187.9492911 | Slc43a2       |
| ENSMUSG00000042821  | 0.240409935  | -2.056431576 | 1.37E-13 | 2.22E-12 | 251.946858 | 184.684715 | 247.220279 | 42.6269585  | 68.25256886 | 68.25256886 | Snai1         |
| ENSMUSG00000058914  | 0.126233937  | -2.985828271 | 1.37E-13 | 2.22E-12 | 2049.64597 | 678.814566 | 2392.69476 | 267.1289399 | 200.1268562 | 179.0464299 | C1qtnf3       |
| ENSMUSG00000055676  | 5.353819369  | 2.420568465  | 1.42E-13 | 2.30E-12 | 18.8287688 | 18.6649446 | 21.1193203 | 107.9882949 | 94.79693188 | 109.8019543 | Gm5069        |
| ENSMUSG00000026581  | 5.599904509  | 2.485402226  | 1.48E-13 | 2.40E-12 | 78.9015073 | 122.795688 | 110.565853 | 853.4864358 | 378.2301827 | 514.3875335 | Sell          |
| ENSMUSG00000023995  | 806.6752125  | 9.655844115  | 1.57E-13 | 2.53E-12 | 0          | 0          | 0          | 64.41407062 | 250.8767288 | 143.4349853 | Tspo2         |
| ENSMUSG000000106258 | 114.8368019  | 6.843432203  | 1.58E-13 | 2.55E-12 | 0          | 1.96473102 | 1.24231296 | 94.72657445 | 94.79693188 | 164.208328  | Rpl7a-ps7     |
| ENSMUSG00000020542  | 5.00783273   | 2.324186375  | 1.61E-13 | 2.60E-12 | 438.44133  | 304.533307 | 177.650753 | 1189.765775 | 1642.189274 | 1788.485886 | Myocd         |
| ENSMUSG00000033857  | 0.424488416  | -1.23620291  | 1.61E-13 | 2.60E-12 | 517.342837 | 492.165119 | 560.283145 | 209.3457295 | 255.6644526 | 200.8089794 | Engase        |
| ENSMUSG00000042215  | 2.372822847  | 1.246604394  | 1.66E-13 | 2.67E-12 | 168.562311 | 188.614177 | 146.592929 | 391.2207525 | 408.8716153 | 398.6503384 | Bag2          |
| ENSMUSG00000030812  | 0.317578768  | -1.654813633 | 1.85E-13 | 2.98E-12 | 507.480149 | 683.726393 | 725.510768 | 210.2929953 | 236.5135573 | 161.2407076 | Enase2a       |
| ENSMUSG00000017724  | 0.119616095  | -3.063516567 | 1.91E-13 | 3.07E-12 | 89.6608037 | 93.324732  | 116.777418 | 9.472657445 | 8.61702898  | 17.80572231 | Etv4          |
| ENSMUSG00000035441  | 2.154561173  | 1.107394061  | 1.92E-13 | 3.08E-12 | 2006.60879 | 1552.1375  | 1528.04494 | 3947.256357 | 3488.335584 | 3529.489845 | MyoId         |
| ENSMUSG00000052911  | 2.167291465  | 1.115893185  | 1.98E-13 | 3.18E-12 | 10029.4575 | 7911.9718  | 7161.93421 | 18779.54338 | 17362.20171 | 18271.63871 | Lamb2         |
| ENSMUSG00000026357  | 31.23435203  | 4.965061696  | 2.22E-13 | 3.54E-12 | 74.4184671 | 108.060206 | 109.32354  | 940.6348843 | 5148.718209 | 3020.048346 | Rgs18         |
| ENSMUSG00000052776  | 0.092057409  | -3.441322347 | 2.28E-13 | 3.63E-12 | 198.150376 | 536.371567 | 498.167497 | 31.25976957 | 60.32532029 | 21.76254949 | Oas1a         |
| ENSMUSG00000026483  | 2.342820514  | 1.282629887  | 2.33E-13 | 3.72E-12 | 5990.2383  | 4587.64692 | 3868.56256 | 12026.48589 | 11627.4661  | 11499.52899 | Fam129a       |
| ENSMUSG00000025038  | 18.33046369  | 4.196171376  | 2.36E-13 | 3.76E-12 | 5.37964822 | 3.92946203 | 2.48462592 | 76.7285253  | 88.09411851 | 57.37399412 | Ehfc2         |
| ENSMUSG00000039462  | 0.011264525  | -6.47206974  | 2.39E-13 | 3.80E-12 | 1717.901   | 471.535444 | 947.884788 | 24.62890936 | 6.702813365 | 3.956827181 | Col10a1       |
| ENSMUSG00000038602  | 0.20337814   | -2.297763475 | 2.49E-13 | 3.95E-12 | 106.696356 | 103.148378 | 103.111976 | 18.94531489 | 22.98107439 | 21.76254949 | Slc35f1       |
| ENSMUSG00000028332  | 591.6654791  | 9.208637913  | 2.51E-13 | 3.97E-12 | 0          | 0          | 1.24231296 | 110.8300921 | 284.3907956 | 260.1613871 | Hemgn         |
| ENSMUSG00000031779  | 0.049324068  | -4.341564404 | 2.50E-13 | 3.97E-12 | 72.625251  | 136.548806 | 141.623677 | 6.630860211 | 9.575447664 | 0.989206795 | Ccl22         |
| ENSMUSG00000034714  | 0.347275203  | -1.525848697 | 2.51E-13 | 3.97E-12 | 355.056783 | 331.057176 | 438.536475 | 146.8261904 | 130.2260882 | 112.7695746 | Tthy2         |
| ENSMUSG00000050730  | 0.392169701  | -1.350450017 | 2.58E-13 | 4.09E-12 | 633.005274 | 595.313498 | 515.559878 | 269.0234714 | 215.4457524 | 199.8197726 | Arhgap42      |
| ENSMUSG00000024590  | 0.338367924  | -1.563335281 | 2.65E-13 | 4.19E-12 | 328.158542 | 457.782327 | 484.502054 | 142.0898617 | 139.8015359 | 147.3918125 | Lmnbl         |
| ENSMUSG00000073412  | 0.135998556  | -2.878336766 | 2.76E-13 | 4.35E-12 | 179.321607 | 316.321693 | 383.874704 | 29.36523808 | 58.41023075 | 31.65461744 | Lst1          |
| ENSMUSG00000047844  | 62.29644395  | 5.961077908  | 3.01E-13 | 4.74E-12 | 0          | 2.94709652 | 1.24231296 | 98.51563742 | 72.77340225 | 84.08257759 | Bex4          |
| ENSMUSG00000019838  | 5.595076008  | 2.48415773   | 3.01E-13 | 4.74E-12 | 186.494472 | 313.374597 | 203.739325 | 717.0801686 | 1675.703341 | 1545.141014 | Slc16a10      |
| ENSMUSG00000034786  | 0.287460984  | -1.798561935 | 3.04E-13 | 4.79E-12 | 352.366959 | 563.877801 | 595.067907 | 151.5625191 | 135.971356  |             |               |

|                     |              |              |          |          |            |            |             |             |              |             |               |
|---------------------|--------------|--------------|----------|----------|------------|------------|-------------|-------------|--------------|-------------|---------------|
| ENSMUSG00000024924  | 2.338158824  | 1.225372931  | 4.16E-13 | 6.41E-12 | 1456.09145 | 1442.11257 | 1088.26615  | 3291.748462 | 2681.125346  | 3354.400242 | Vldlr         |
| ENSMUSG00000068758  | 0.233172541  | -2.100530193 | 4.20E-13 | 6.46E-12 | 507.480149 | 853.675626 | 1110.62779  | 174.296897  | 210.6598486  | 190.9169115 | Il3ra         |
| ENSMUSG00000025656  | 2.170954592  | 1.118329551  | 4.34E-13 | 6.68E-12 | 283.32814  | 240.679549 | 239.766401  | 535.2051456 | 529.5222558  | 596.4916975 | Arrap6        |
| ENSMUSG00000028701  | 2.661979419  | 1.412499417  | 4.36E-13 | 6.71E-12 | 169.458919 | 123.778054 | 139.139051  | 401.6406757 | 401.21125757 | 350.1792055 | Luref1        |
| ENSMUSG00000034593  | 0.417157642  | -1.261335421 | 4.40E-13 | 6.75E-12 | 2115.09836 | 1614.02653 | 1448.53691  | 730.341889  | 739.2245597  | 691.4555498 | Myo5a         |
| ENSMUSG00000051375  | 0.490677508  | -1.027152952 | 4.54E-13 | 6.97E-12 | 1055.30766 | 861.53455  | 1029.87744  | 500.1563131 | 452.9186745  | 492.624984  | Pcdh1         |
| ENSMUSG00000034235  | 2.837384333  | 1.504561581  | 4.60E-13 | 7.04E-12 | 476.098868 | 321.235251 | 293.185858  | 1028.730598 | 1020.742721  | 1051.526823 | Usp54         |
| ENSMUSG00000048279  | 2.983459875  | 1.576986374  | 4.60E-13 | 7.04E-12 | 811.430274 | 649.3436   | 464.625047  | 1697.500214 | 1996.480838  | 2058.539341 | Sacs          |
| ENSMUSG00000024049  | 2.98870242   | 1.579519257  | 4.84E-13 | 7.39E-12 | 6792.70249 | 10719.5724 | 6061.24493  | 23037.50291 | 24523.67901  | 22897.16969 | Myom1         |
| ENSMUSG00000065445  | 3.25620875   | 1.703193191  | 4.85E-13 | 7.41E-12 | 115.662437 | 94.3070887 | 77.0234035  | 341.015668  | 333.2255787  | 265.1074211 | Mir143        |
| ENSMUSG00000097233  | 3.020936461  | 1.59499584   | 4.86E-13 | 7.42E-12 | 140.767462 | 120.830957 | 88.2042201  | 363.7500459 | 331.3104892  | 367.9849278 | Mir17552      |
| ENSMUSG00000010175  | 0.331319012  | -1.593707102 | 4.93E-13 | 7.52E-12 | 867.91658  | 537.353933 | 624.883418  | 235.8691704 | 210.6598486  | 226.5283561 | Prox1         |
| ENSMUSG00000110408  | 33.79887188  | 5.078903189  | 5.06E-13 | 7.70E-12 | 0.86968004 | 1.96473102 | 3.72693888  | 62.51953913 | 68.94322318  | 78.14733682 | Gm45881       |
| ENSMUSG00000036106  | 0.359708597  | -1.475099455 | 5.10E-13 | 7.75E-12 | 255.533291 | 222.014605 | 249.704905  | 85.253917   | 79.47621561  | 96.94226592 | Prr5          |
| ENSMUSG00000028873  | 0.175270038  | -2.512348704 | 5.14E-13 | 7.80E-12 | 102.213316 | 142.442999 | 157.773746  | 28.41797233 | 18.1935056   | 23.74096308 | Cdca8         |
| ENSMUSG00000029177  | 0.334488603  | -1.579971041 | 5.17E-13 | 7.85E-12 | 242.08417  | 288.815459 | 341.636064  | 101.3574347 | 91.92429758  | 97.93147272 | Cenpa         |
| ENSMUSG00000020802  | 6.235478757  | 2.640500334  | 5.31E-13 | 8.05E-12 | 602.520601 | 625.25325  | 606.248724  | 6190.38164  | 3268.100288  | 1821.12971  | Ube2o         |
| ENSMUSG00000047180  | 0.25153423   | -1.991173351 | 5.39E-13 | 8.15E-12 | 604.313817 | 1129.72033 | 941.673223  | 281.3379261 | 189.5938638  | 201.7981862 | Neur3         |
| ENSMUSG00000020592  | 0.498108251  | -1.005468787 | 5.74E-13 | 8.67E-12 | 3143.50778 | 2875.38384 | 3284.67546  | 1481.523624 | 1378.864646  | 1773.647784 | Sdc1          |
| ENSMUSG00000071818  | 26.28679808  | 4.716266517  | 5.80E-13 | 8.77E-12 | 4.48304019 | 1.96473102 | 1.24231296  | 65.36133637 | 85.22148421  | 61.3308213  | 4930417022Rik |
| ENSMUSG00000039481  | 3.991220132  | 1.996829851  | 5.84E-13 | 8.81E-12 | 79.7981153 | 67.78322   | 130.442861  | 335.3320735 | 359.0792874  | 407.5531996 | Nrtn          |
| ENSMUSG00000023046  | 0.454275865  | -1.138359436 | 6.24E-13 | 9.40E-12 | 3737.95891 | 3842.0315  | 4895.95537  | 1662.451382 | 1987.862935  | 2016.003448 | Igfbp6        |
| ENSMUSG00000059326  | 0.291459722  | -1.77863157  | 6.32E-13 | 9.52E-12 | 789.911681 | 1069.79604 | 636.064235  | 296.494178  | 212.5749382  | 218.6147017 | Csf2ra        |
| ENSMUSG00000037855  | 2.745360002  | 1.456995344  | 6.47E-13 | 9.74E-12 | 176.631783 | 174.86106  | 162.742998  | 576.8848384 | 414.6168839  | 421.4020947 | Zfp365        |
| ENSMUSG00000031170  | 500.7673802  | 8.967996779  | 6.57E-13 | 9.88E-12 | 0          | 0          | 0           | 93.7793087  | 119.6930958  | 71.22288925 | Slc38a5       |
| ENSMUSG00000097252  | 13.60883043  | 3.766471179  | 6.84E-13 | 1.03E-11 | 52.8998742 | 38.3122548 | 70.8118387  | 256.7090167 | 1374.07674   | 568.7939072 | Gm6634        |
| ENSMUSG00000027331  | 0.223723225  | -2.16021306  | 6.87E-13 | 1.03E-11 | 130.008165 | 203.34966  | 202.497012  | 37.89062978 | 39.25933542  | 42.53589219 | Knstrn        |
| ENSMUSG000000907451 | 0.328704715  | -1.605135945 | 6.87E-13 | 1.03E-11 | 3796.23843 | 2493.24366 | 4376.66856  | 1089.355606 | 1331.94477   | 1084.170647 | Rian          |
| ENSMUSG00000060791  | 0.255172969  | -1.970452587 | 7.13E-13 | 1.07E-11 | 283.32814  | 510.830064 | 482.017428  | 104.1992319 | 101.4997452  | 119.6940222 | Gmfgf         |
| ENSMUSG00000078117  | 15.5550363   | 3.959309857  | 7.18E-13 | 1.07E-11 | 7.1728643  | 16.7002136 | 1.24231296  | 156.2988478 | 129.2685435  | 115.737195  | Gm16485       |
| ENSMUSG00000029570  | 0.48859764   | -1.033281199 | 7.62E-13 | 1.14E-11 | 1062.48052 | 1268.23387 | 1262.18997  | 586.3574958 | 530.4798006  | 638.0383829 | Lfng          |
| ENSMUSG00000001333  | 4.801281914  | 2.163419648  | 7.83E-13 | 1.17E-11 | 174.838567 | 187.631812 | 177.0234035 | 811.806743  | 646.3427173  | 660.7901391 | Sync          |
| ENSMUSG00000044835  | 35.66766108  | 5.156544709  | 7.85E-13 | 1.17E-11 | 0.89660804 | 0.98236551 | 4.96925184  | 84.30665126 | 78.51867085  | 60.3416145  | Ankrd45       |
| ENSMUSG00000037628  | 9.44758549   | 3.239945677  | 7.93E-13 | 1.18E-11 | 30.4846733 | 35.3651583 | 36.0270758  | 131.6699385 | 371.5273694  | 458.0027461 | Cdkn3         |
| ENSMUSG00000056445  | 0.042525471  | 2.016220117  | 8.02E-13 | 1.19E-11 | 56.4863063 | 39.2946203 | 38.5117017  | 208.3984638 | 180.0184161  | 158.2730872 | Hoxaas2       |
| ENSMUSG00000016262  | 0.355040067  | -1.493946252 | 8.17E-13 | 1.22E-11 | 1258.83768 | 789.821868 | 937.946284  | 376.0645006 | 322.6925863  | 362.049687  | Sertad4       |
| ENSMUSG00000022489  | 0.424066728  | -1.237636802 | 8.33E-13 | 1.24E-11 | 376.575376 | 358.56341  | 340.393751  | 154.4043163 | 135.0138121  | 167.1759484 | Pde1b         |
| ENSMUSG00000032332  | 0.186972075  | -2.193159098 | 8.68E-13 | 1.29E-11 | 7093.06618 | 3013.89738 | 3579.10364  | 962.4219964 | 1143.3184951 | 887.3184952 | Col12a1       |
| ENSMUSG00000072825  | 2.06827095   | 1.048425196  | 8.91E-13 | 1.32E-11 | 752.254143 | 572.719091 | 710.603013  | 1467.314638 | 1398.015359  | 1344.332035 | Cep170b       |
| ENSMUSG00000072620  | 0.223673879  | -2.160531308 | 8.93E-13 | 1.32E-11 | 829.362434 | 1899.89489 | 1856.01556  | 357.1191857 | 346.6312055  | 321.4922084 | Sfnf2         |
| ENSMUSG00000024644  | 0.410566119  | -1.284313518 | 8.94E-13 | 1.32E-11 | 1387.05263 | 1960.80155 | 1913.16196  | 760.6543928 | 757.4179103  | 641.0060032 | Cndp2         |
| ENSMUSG00000079293  | 0.213150039  | -2.230058777 | 9.61E-13 | 1.42E-11 | 446.510802 | 1024.60722 | 669.606685  | 165.7715053 | 162.7826103  | 127.6076766 | Clec7a        |
| ENSMUSG00000033446  | 0.46873852   | -1.093144737 | 9.67E-13 | 1.43E-11 | 575.62236  | 554.054146 | 545.375389  | 251.0254223 | 296.8388776  | 237.4096308 | Lpar6         |
| ENSMUSG00000037555  | 0.176958407  | -2.49851779  | 9.69E-13 | 1.43E-11 | 169.458919 | 383.122548 | 341.636064  | 57.78321041 | 48.83478309  | 51.43875335 | Gm4951        |
| ENSMUSG00000033427  | 6.500307282  | 2.700507919  | 1.00E-12 | 1.48E-11 | 17.9321607 | 33.4004273 | 26.0885721  | 220.7129185 | 122.5657301  | 158.2730872 | Upb1          |
| ENSMUSG00000024338  | 0.253618936  | -1.979256528 | 1.02E-12 | 1.50E-11 | 907.367334 | 1937.22478 | 1608.79528  | 351.4355912 | 348.546295   | 429.3157491 | Psmb8         |
| ENSMUSG00000053318  | 0.043159737  | -4.534170128 | 1.04E-12 | 1.54E-11 | 62.7625626 | 271.13288  | 134.1698    | 6.630860211 | 9.575447664  | 3.956827181 | Slamf8        |
| ENSMUSG00000029659  | 0.421794928  | -1.245386349 | 1.06E-12 | 1.55E-11 | 1574.44371 | 1601.25578 | 2140.50523  | 702.8711824 | 838.8092154  | 699.3692042 | Medag         |
| ENSMUSG00000026574  | 0.404659669  | -1.305219027 | 1.08E-12 | 1.59E-11 | 11687.2858 | 10553.5526 | 16422.135   | 5034.717432 | 5171.699284  | 5437.669753 | Dpt           |
| ENSMUSG00000053113  | 0.402814304  | -1.311813179 | 1.11E-12 | 1.63E-11 | 1101.03467 | 1150.35001 | 1180.19731  | 451.8457601 | 563.9938674  | 366.0065142 | Socs3         |
| ENSMUSG00000024066  | 0.351552933  | -1.508186164 | 1.12E-12 | 1.64E-11 | 3055.64019 | 2581.65655 | 1843.59243  | 891.3770655 | 976.6956618  | 762.678439  | Xdh           |
| ENSMUSG00000006538  | 20.21538745  | 4.337381949  | 1.16E-12 | 1.69E-11 | 1.79321607 | 3.92946203 | 7.45387776  | 55.88867892 | 104.3723795  | 93.97464554 | Ihh           |
| ENSMUSG00000031162  | 66.68893182  | 6.059375436  | 1.16E-12 | 1.70E-11 | 1.79321607 | 0.98236551 | 1.24231296  | 67.25586786 | 132.1411778  | 72.21209604 | Gata1         |
| ENSMUSG00000035829  | 3.301275502  | 1.723023541  | 1.18E-12 | 1.72E-11 | 52.0032661 | 50.1006409 | 57.1463961  | 195.1367434 | 157.0373417  | 172.1219824 | Ppp1r26       |
| ENSMUSG00000040855  | 0.374623457  | -1.416486859 | 1.19E-12 | 1.74E-11 | 314.709421 | 253.450301 | 286.974294  | 97.56837168 | 106.2874691  | 116.7264018 | Reps2         |
| ENSMUSG00000034723  | 2.100302985  | 1.070597463  | 1.22E-12 | 1.78E-11 | 979.992585 | 873.322936 | 721.783829  | 1896.42602  | 1701.55705   | 1817.172883 | Tmx4          |
| ENSMUSG00000088948  | 37.76286404  | 5.23889632   | 1.28E-12 | 1.86E-11 | 3.58643215 | 0.98236551 | 1.24231296  | 86.20118275 | 52.66496215  | 90.01781836 | Gm23262       |
| ENSMUSG00000042684  | 0.133564796  | -2.904388288 | 1.30E-12 | 1.89E-11 | 78.9015073 | 101.183647 | 124.231296  | 9.472657445 | 17.2358058   | 13.84889513 | Npl           |
| ENSMUSG00000083992  | 4.920859065  | 2.298910198  | 1.40E-12 | 2.03E-11 | 37.6575376 | 43.2240823 | 54.6617702  | 199.8730721 | 166.6127894  | 296.7620385 | Gm11478       |
| ENSMUSG00000084817  | 5.346134122  | 2.418496032  | 1.41E-12 | 2.05E-11 | 78.0048992 | 132.619344 | 129.200548  | 362.8027801 | 808.1677829  | 641.99521   | Gm5526        |
| ENSMUSG00000035187  | 11.13988963  | 3.477663033  | 1.43E-12 | 2.07E-11 | 6.27625626 | 4.91182754 | 18.6346944  | 100.4101689 | 106.2874691  | 112.7695746 | Nkx6-1        |
| ENSMUSG00000043336  | 0.2427371415 | 1.279394874  | 1.53E-12 | 2.21E-11 | 6139.07523 | 4713.38971 | 3924.46664  | 11572.7456  | 11480.96175  | 12823.08769 | Filip1l       |
| ENSMUSG00000066861  | 0.058733477  | -0.48967315  | 1.54E-12 | 2.22E-11 | 75.3150751 | 265.238687 | 151.562181  | 6.630860211 | 15.32071626  | 6.924447566 | Oas1g         |
| ENSMUSG00000049988  | 0.140259518  | -2.833829416 | 1.55E-12 | 2.24E-11 | 172.148743 | 335.969004 | 293.185858  | 44.52148999 | 47.87723832  | 19.7841359  | Lrrc25        |
| ENSMUSG00000036863  | 2.50991574   | 1.327638932  | 1.73E-12 | 2.49E-11 | 513.756405 | 349.722121 | 381.390078  | 1110.195453 | 1072.450138  | 945.6816961 | Syde2         |
| ENSMUSG00000021567  | 0.324103632  | -1.625472907 | 1.77E-12 | 2.55E-11 | 508.376757 | 372.316527 | 329.212934  | 119.3554838 | 135.9713568  | 137.4997445 | Nkd2          |
| ENSMUSG00000071042  | 0.313907933  | -1.671586607 | 1.83E-12 | 2.62E-11 | 448.304019 | 481.359099 | 386.35933   | 170.507834  | 141.7166254  | 100.8990931 | Rasgrp3       |
| ENSMUSG00000026622  | 0.105298361  | -2.734098816 | 1.86E-12 | 2.67E-11 | 75.31507   |            |             |             |              |             |               |

|                     |               |              |          |          |             |            |            |             |             |             |              |
|---------------------|---------------|--------------|----------|----------|-------------|------------|------------|-------------|-------------|-------------|--------------|
| ENSMUSG000000106847 | 2.097421107   | 1.068616546  | 2.77E-12 | 3.90E-11 | 1448.91859  | 1173.92678 | 1059.69295 | 2475.20539  | 2502.064475 | 2752.962511 | Peg13        |
| ENSMUSG000000044583 | 0.20524501    | -2.284580949 | 2.78E-12 | 3.91E-11 | 264.499371  | 333.021907 | 278.278103 | 55.88867892 | 87.13657375 | 36.60065142 | Tlr7         |
| ENSMUSG000000008730 | 2.232217226   | 1.158477428  | 2.80E-12 | 3.93E-11 | 2844.04069  | 2399.91893 | 2210.07475 | 6518.135588 | 5275.114118 | 4850.080917 | Hipk1        |
| ENSMUSG000000030263 | 0.239109773   | -2.064254997 | 3.00E-12 | 4.21E-11 | 268.982411  | 358.56341  | 253.431844 | 95.67384019 | 52.66496215 | 62.32002809 | Lrmp         |
| ENSMUSG000000084989 | 0.041239411   | -4.599832466 | 3.04E-12 | 4.26E-11 | 63.6591706  | 115.91913  | 53.4194572 | 4.736328722 | 2.872634299 | 1.97841359  | Croc2        |
| ENSMUSG00000002257  | 0.395685116   | -1.337575297 | 3.18E-12 | 4.44E-11 | 271.672235  | 315.339328 | 350.332254 | 123.1445468 | 128.3109987 | 118.7048154 | Def6         |
| ENSMUSG000000036002 | 2.207517479   | 1.142424861  | 3.18E-12 | 4.45E-11 | 873.296228  | 868.411109 | 857.195942 | 1779.912334 | 2316.30079  | 1641.094073 | Fam214b      |
| ENSMUSG000000023349 | 0.070281565   | -3.830709868 | 3.23E-12 | 4.51E-11 | 256.429899  | 478.412002 | 495.682871 | 15.15625191 | 59.36777552 | 11.87048154 | Clec4n       |
| ENSMUSG000000051748 | 0.232134118   | -2.106969519 | 3.34E-12 | 4.66E-11 | 133.594598  | 142.442999 | 172.681501 | 35.99609829 | 42.13196972 | 25.71937672 | Wfdc21       |
| ENSMUSG000000035455 | 0.198571962   | -2.332266161 | 3.42E-12 | 4.76E-11 | 94.1438439  | 105.113109 | 86.9619071 | 19.89258063 | 17.2358058  | 19.7841359  | Figl1        |
| ENSMUSG000000034040 | 0.251106823   | -1.993626867 | 3.42E-12 | 4.77E-11 | 279.741708  | 278.991804 | 437.294162 | 70.09766509 | 104.3723795 | 75.17971643 | Galnt17      |
| ENSMUSG000000075027 | 4.173938749   | 2.06140943   | 3.61E-12 | 5.01E-11 | 41.2439697  | 33.4004273 | 50.9348313 | 141.1425959 | 175.2306923 | 204.7658066 | 463140519Rik |
| ENSMUSG000000044017 | 0.415861626   | -1.26582453  | 3.64E-12 | 5.05E-11 | 92.402886   | 852.693261 | 1057.20833 | 322.0703531 | 399.2961676 | 457.0135394 | Adgrd1       |
| ENSMUSG000000049130 | 0.149386149   | -2.742881705 | 3.78E-12 | 5.24E-11 | 293.190828  | 510.830064 | 628.610357 | 95.67384019 | 80.43376038 | 37.58985821 | Csar1        |
| ENSMUSG000000071656 | 0.389543759   | -1.360142695 | 3.91E-12 | 5.41E-11 | 769.289696  | 657.202525 | 783.899477 | 328.7012133 | 309.2869596 | 222.5715289 | Lrrm4cl      |
| ENSMUSG000000040859 | 2.37559479    | 1.248288774  | 3.94E-12 | 5.45E-11 | 695.767837  | 711.232627 | 755.326279 | 1587.617388 | 2119.046568 | 1428.414612 | Bsdcl        |
| ENSMUSG000000021268 | 0.304047377   | -1.717631949 | 4.04E-12 | 5.59E-11 | 11446.0982  | 10005.3927 | 19003.6613 | 3928.311042 | 4684.308997 | 3686.773725 | Meg3         |
| ENSMUSG000000025855 | 0.356017823   | -1.489978629 | 4.15E-12 | 5.74E-11 | 215.185929  | 184.684715 | 221.131707 | 69.15039935 | 75.64603655 | 76.16892323 | Pkrar1b      |
| ENSMUSG000000065599 | 4.241651086   | 2.084625951  | 4.17E-12 | 5.75E-11 | 45.7270099  | 44.2064478 | 50.9348313 | 141.1425959 | 236.5135573 | 218.6147017 | Mir23b       |
| ENSMUSG00000001366  | 2.180959478   | 1.124962965  | 4.18E-12 | 5.77E-11 | 70.113565   | 70.1408972 | 576.433213 | 1384.902518 | 1667.085438 | 1287.947247 | Fbxo3        |
| ENSMUSG000000021202 | 0.208618729   | -2.261059412 | 4.22E-12 | 5.81E-11 | 217.875753  | 451.888133 | 411.20559  | 75.78125956 | 87.13657375 | 62.32002809 | Dok2         |
| ENSMUSG000000000120 | 0.16028809    | -2.041260866 | 4.28E-12 | 5.90E-11 | 152.423366  | 111.007302 | 84.4772812 | 18.94531489 | 17.2358058  | 19.7841359  | Ngfr         |
| ENSMUSG000000021411 | 2.079302348   | 1.06099553   | 4.30E-12 | 5.92E-11 | 597.140953  | 610.04898  | 636.064235 | 1071.357557 | 1334.817404 | 1425.446992 | Pxdcl        |
| ENSMUSG000000022878 | 0.337712253   | -1.56613357  | 4.47E-12 | 6.14E-11 | 5741.87787  | 3250.64746 | 4261.13345 | 1358.379078 | 1739.858841 | 1377.965066 | Adipoq       |
| ENSMUSG000000093954 | 46.01819108   | 5.524132369  | 4.47E-12 | 6.14E-11 | 3.58643215  | 2.94709652 | 0          | 47.36328722 | 169.4854237 | 102.8775067 | Gm16867      |
| ENSMUSG00000002586  | 76.58865461   | 6.259058791  | 4.62E-12 | 6.34E-11 | 0           | 0.98236551 | 3.72693888 | 71.04493083 | 180.0184161 | 72.21209604 | Ly6g6c       |
| ENSMUSG000000021448 | 0.255030578   | -1.971257859 | 4.63E-12 | 6.34E-11 | 718.183038  | 1279.03989 | 1351.6365  | 330.5957448 | 310.2445043 | 212.679461  | Fyb          |
| ENSMUSG000000025964 | 0.249152781   | -2.004897419 | 4.68E-12 | 6.41E-11 | 468.926003  | 273.097611 | 294.428171 | 95.67384019 | 69.90076795 | 92.98543874 | Adam23       |
| ENSMUSG000000056515 | 0.495677365   | -1.012526715 | 4.76E-12 | 6.51E-11 | 2374.21808  | 1768.25791 | 1986.45842 | 1041.992319 | 1005.422005 | 991.1852087 | Rab31        |
| ENSMUSG000000074221 | 2.13609622    | 1.094976634  | 4.85E-12 | 6.63E-11 | 432.165074  | 450.905768 | 332.939873 | 852.53917   | 869.4506479 | 881.3832545 | Zfp568       |
| ENSMUSG000000025473 | 0.169506574   | -2.560586871 | 4.86E-12 | 6.64E-11 | 315.606029  | 537.353933 | 335.424499 | 101.3573437 | 58.41023075 | 41.5466854  | Adam8        |
| ENSMUSG000000042129 | 0.332930413   | -1.586707431 | 4.94E-12 | 6.75E-11 | 920.816454  | 1252.51602 | 911.857712 | 439.5313054 | 298.7539671 | 288.8483842 | Rassf4       |
| ENSMUSG000000043085 | 10.21171784   | 3.352153676  | 4.97E-12 | 6.79E-11 | 26.0016331  | 11.7883861 | 38.5117017 | 139.2480644 | 270.0276241 | 363.0388938 | Tmem82       |
| ENSMUSG000000050493 | 0.187342458   | -2.416250198 | 5.10E-12 | 6.95E-11 | 99.5234921  | 162.090309 | 140.381364 | 20.83984638 | 30.64143253 | 23.74096308 | Fam167b      |
| ENSMUSG000000037979 | 5.182754421   | 2.373719035  | 5.13E-12 | 6.98E-11 | 34.0711054  | 38.1252458 | 40.9963277 | 168.6133025 | 273.8578032 | 143.4349853 | Ccdc92       |
| ENSMUSG000000082361 | 5.222133898   | 2.384639449  | 5.16E-12 | 7.02E-11 | 28.6914572  | 44.2064478 | 57.1463961 | 288.9160521 | 171.4005132 | 212.679461  | Btc          |
| ENSMUSG000000030772 | 2.016031662   | 1.011518297  | 5.27E-12 | 7.16E-11 | 407.68.6696 | 3065.96275 | 4018.88242 | 7744.844727 | 7041.784212 | 7177.791416 | Dkk3         |
| ENSMUSG000000032363 | 0.228231513   | -2.131430089 | 5.29E-12 | 7.19E-11 | 28.811118   | 184.684715 | 258.401096 | 42.6269585  | 73.73094702 | 50.44954655 | Adams7       |
| ENSMUSG000000039903 | 3.222021651   | 1.687966189  | 5.44E-12 | 7.38E-11 | 108.489572  | 110.024937 | 135.412113 | 287.9687863 | 459.6214879 | 389.7474773 | Eva1c        |
| ENSMUSG000000042804 | 0.408390217   | -1.291979788 | 5.82E-12 | 7.88E-11 | 1261.52751  | 863.499281 | 1141.68561 | 397.8516127 | 460.5790327 | 475.8084685 | Gpr153       |
| ENSMUSG000000032344 | 2.240662469   | -2.055276646 | 6.02E-12 | 8.14E-11 | 140.767462  | 202.367295 | 209.95089  | 48.31055297 | 49.73223786 | 34.62223786 | Mab21d1      |
| ENSMUSG000000025950 | 0.495738268   | -1.012349463 | 6.33E-12 | 8.55E-11 | 2442.36029  | 1960.80155 | 2220.01326 | 1223.867342 | 1079.152952 | 980.303934  | Idh1         |
| ENSMUSG000000022479 | 0.127367433   | -2.972931662 | 6.35E-12 | 8.57E-11 | 89.6608037  | 66.8008545 | 93.1734719 | 11.36718893 | 13.40562673 | 6.924447566 | Vdr          |
| ENSMUSG000000022534 | 0.107115325   | -3.222763197 | 6.54E-12 | 8.83E-11 | 70.8320349  | 133.601709 | 83.2349683 | 9.472657445 | 13.40562673 | 7.913654361 | Mefv         |
| ENSMUSG000000063506 | 0.18965289    | -2.398566737 | 6.65E-12 | 8.97E-11 | 98.6268841  | 107.07784  | 83.2349683 | 19.89258063 | 20.1084401  | 14.83810193 | Ahrgap22     |
| ENSMUSG000000069601 | 0.269099776   | -1.893786903 | 6.71E-12 | 9.04E-11 | 502.100501  | 777.051116 | 759.053218 | 179.9804914 | 236.5135573 | 131.5645038 | Ank3         |
| ENSMUSG000000051596 | 4.282394835   | 2.098417818  | 6.75E-12 | 9.09E-11 | 43.9337938  | 30.4533307 | 37.2693888 | 191.3476804 | 158.9524312 | 128.5968433 | Otop1        |
| ENSMUSG000000047420 | 0.204576091   | -2.28929055  | 6.99E-12 | 9.39E-11 | 234.911306  | 180.755253 | 163.985311 | 25.5761751  | 52.66496215 | 40.5574786  | Fam180a      |
| ENSMUSG000000024420 | 0.330641678   | -1.596659502 | 7.10E-12 | 9.52E-11 | 1344.91206  | 964.682928 | 832.349683 | 342.9101995 | 288.2209747 | 408.5424064 | Zfp251       |
| ENSMUSG000000033083 | 0.416487672   | -1.263654302 | 7.30E-12 | 9.79E-11 | 737.011806  | 756.421441 | 573.948587 | 297.4414438 | 315.9897729 | 248.2909056 | Ptcd14       |
| ENSMUSG000000023913 | 0.163974865   | -2.608453411 | 7.35E-12 | 9.85E-11 | 717.082912  | 1372.36461 | 911.857712 | 229.2383102 | 193.4240428 | 78.14733682 | Plac2g7      |
| ENSMUSG000000035004 | 0.245999406   | -2.023273263 | 7.45E-12 | 9.98E-11 | 231.324874  | 356.598679 | 217.404768 | 71.04493083 | 74.68849178 | 52.42796014 | Igfbp6       |
| ENSMUSG000000029005 | 12.27135171   | 3.617222268  | 7.69E-12 | 1.03E-10 | 3.58643215  | 7.85892406 | 14.9077555 | 137.3535329 | 95.75447664 | 79.13654361 | Draxin       |
| ENSMUSG000000000555 | 2.137439969   | 1.095883902  | 7.72E-12 | 1.03E-10 | 4414.89797  | 4670.16562 | 4529.47305 | 8279.102607 | 11844.82876 | 8976.062459 | Itga5        |
| ENSMUSG000000036894 | 0.38637169    | -1.371938705 | 7.89E-12 | 1.05E-10 | 502.100501  | 612.996077 | 726.753081 | 246.2890936 | 257.5795422 | 206.7442202 | Rap2b        |
| ENSMUSG000000022952 | 0.258271389   | -1.95304026  | 7.92E-12 | 1.06E-10 | 763.910048  | 997.10099  | 1540.46807 | 330.5957448 | 279.7964224 | 223.5607357 | Runt1        |
| ENSMUSG000000065475 | 0.369736557   | 1.835817609  | 7.93E-12 | 1.06E-10 | 60.9693465  | 53.0477374 | 36.0270758 | 176.914285  | 188.636319  | 176.0788095 | Mir27b       |
| ENSMUSG000000061482 | 22.35160568   | 4.48230657   | 7.96E-12 | 1.06E-10 | 2.68982411  | 0.98236551 | 9.93850367 | 123.1445468 | 66.07058888 | 96.94226592 | Hist1h4d     |
| ENSMUSG000000014776 | 0.341443786   | -1.550280015 | 8.18E-12 | 1.09E-10 | 260.912939  | 387.05201  | 359.028445 | 106.0937634 | 119.6930958 | 117.7156086 | Nol3         |
| ENSMUSG00000004317  | 0.412022809   | -1.279203889 | 8.46E-12 | 1.12E-10 | 356.849999  | 295.692018 | 382.182186 | 151.5625191 | 128.3109987 | 126.6184698 | Cln5         |
| ENSMUSG000000027306 | 4.687465499   | 2.228808072  | 8.59E-12 | 1.14E-10 | 139.870854  | 173.878695 | 166.469937 | 452.7930259 | 1119.369832 | 677.6066547 | Nusap1       |
| ENSMUSG000000051735 | 0.25677324    | -1.96143324  | 8.68E-12 | 1.15E-10 | 172.148743  | 288.815459 | 211.193203 | 63.46680488 | 51.70741739 | 57.37399412 | Rinl         |
| ENSMUSG000000031803 | 0.478567545   | -1.063205532 | 8.82E-12 | 1.17E-10 | 647.351003  | 796.698427 | 631.094983 | 322.0703531 | 332.268034  | 339.2979307 | B3gnt3       |
| ENSMUSG000000026875 | 0.359527459   | -1.475826136 | 9.17E-12 | 1.21E-10 | 378.368592  | 570.75436  | 465.86736  | 179.0332257 | 179.0608713 | 150.3594329 | Traf1        |
| ENSMUSG000000100862 | 2.739144766   | 1.453725516  | 9.34E-12 | 1.24E-10 | 112.972613  | 143.425364 | 111.808166 | 375.1172348 | 348.546295  | 285.8807638 | Gm10925      |
| ENSMUSG000000029866 | 204.4236861   | 7.675418557  | 9.47E-12 | 1.25E-10 | 0           | 0          | 2.48462592 | 72.93946232 | 203.9570353 | 149.3702261 | Kel          |
| ENSMUSG000000044550 | 3.430342857   | 1.778352778  | 9.47E-12 | 1.25E-10 | 143.457286  | 82.5187026 | 155.28912  | 431.9531795 | 403.1263467 | 469.8732277 | Tceal3       |
| ENSMUSG000000055675 | 0.449886104</ |              |          |          |             |            |            |             |             |             |              |

|                     |             |              |          |          |             |            |            |             |             |              |                |
|---------------------|-------------|--------------|----------|----------|-------------|------------|------------|-------------|-------------|--------------|----------------|
| ENSMUSG00000009376  | 0.414557491 | -1.270355904 | 1.26E-11 | 1.63E-10 | 554.103767  | 681.761662 | 540.406137 | 287.0215206 | 228.8531992 | 220.5931153  | Met            |
| ENSMUSG000000032261 | 4.346464671 | 2.119842418  | 1.29E-11 | 1.67E-10 | 284.224748  | 240.679549 | 263.370347 | 782.4415049 | 1766.670094 | 877.4264273  | Sh3bgrl2       |
| ENSMUSG000000025492 | 0.462992927 | -1.110937942 | 1.33E-11 | 1.72E-10 | 5480.96493  | 7766.5817  | 7200.44591 | 2886.318723 | 3408.859369 | 3171.396985  | Ifitm3         |
| ENSMUSG000000000197 | 3.333729387 | 1.737136999  | 1.36E-11 | 1.76E-10 | 283.2814    | 156.196116 | 167.712249 | 636.5625803 | 646.3427173 | 746.8511303  | Nalcn          |
| ENSMUSG000000036304 | 17.82402428 | 4.155751198  | 1.40E-11 | 1.81E-10 | 4.48304019  | 4.91182754 | 2.48462592 | 47.36328722 | 98.62711094 | 70.23368245  | Zdhhc23        |
| ENSMUSG000000029314 | 0.291388209 | -1.778985593 | 1.43E-11 | 1.85E-10 | 348.780526  | 279.97417  | 473.321237 | 110.8300921 | 119.6930958 | 90.01781836  | Gpat3          |
| ENSMUSG000000040138 | 7.004359945 | 2.808253224  | 1.43E-11 | 1.85E-10 | 8.96680037  | 11.7883861 | 11.1808166 | 83.95683551 | 69.90076795 | 69.24447566  | Ndp            |
| ENSMUSG000000027639 | 0.381605242 | -1.389847107 | 1.44E-11 | 1.85E-10 | 2882.59484  | 4821.44991 | 4279.76814 | 1596.142779 | 1592.396947 | 1383.900306  | Samhd1         |
| ENSMUSG000000054000 | 2.105539504 | 1.074189944  | 1.44E-11 | 1.86E-10 | 182.90804   | 198.437833 | 193.800822 | 377.0117663 | 438.555503  | 394.6935113  | Tusc1          |
| ENSMUSG000000022061 | 11.18342507 | 3.483290194  | 1.46E-11 | 1.87E-10 | 2.68982411  | 8.84128957 | 12.4231296 | 93.7793087  | 92.88184235 | 72.21209604  | Nkx3-1         |
| ENSMUSG000000025269 | 2.948626721 | 1.560043197  | 1.46E-11 | 1.87E-10 | 153.319974  | 127.707516 | 118.019731 | 309.7558984 | 464.4092117 | 405.574786   | Apex2          |
| ENSMUSG000000021047 | 0.321998936 | -1.634872175 | 1.52E-11 | 1.95E-10 | 336.228014  | 370.351796 | 482.017428 | 126.9336098 | 153.2071626 | 101.8882999  | Nova1          |
| ENSMUSG000000029915 | 0.134492402 | -2.894403422 | 1.55E-11 | 1.99E-10 | 114.765829  | 280.956535 | 155.28912  | 24.62890936 | 30.64143253 | 18.79492911  | Clec5a         |
| ENSMUSG000000058163 | 0.094931247 | -3.396973157 | 1.57E-11 | 2.01E-10 | 68.1422108  | 136.548806 | 69.5695257 | 7.578125956 | 8.617902898 | 9.892067951  | Gm5431         |
| ENSMUSG000000052572 | 4.406315295 | 2.139572731  | 1.67E-11 | 2.14E-10 | 48.416834   | 27.5062342 | 42.2386406 | 172.4023655 | 205.8721248 | 142.4457785  | Dlg2           |
| ENSMUSG000000006043 | 0.220058486 | -2.184041088 | 1.70E-11 | 2.17E-10 | 227.738441  | 128.689881 | 187.589257 | 33.15430106 | 41.17442496 | 45.50351258  | Adamts4        |
| ENSMUSG000000039208 | 0.352376443 | -1.504810614 | 1.74E-11 | 2.22E-10 | 653.627259  | 915.564653 | 1047.26982 | 265.2344084 | 353.3340188 | 302.6972793  | Metrln         |
| ENSMUSG000000025461 | 0.128931531 | -2.955322963 | 1.76E-11 | 2.24E-10 | 77.1082912  | 107.07784  | 77.0234035 | 16.10351766 | 7.660358132 | 9.892067951  | Cdt13l1        |
| ENSMUSG000000030852 | 2.785912796 | 1.4781501    | 1.81E-11 | 2.30E-10 | 1211.31746  | 2247.65228 | 1663.45705 | 481.162716  | 4720.69569  | 4737.311342  | Tacc2          |
| ENSMUSG000000088789 | 53.34969961 | 5.737408243  | 1.88E-11 | 2.40E-10 | 179.231607  | 0          | 3.72693888 | 45.46875573 | 90.96675281 | 141.4565717  | Scama13        |
| ENSMUSG000000040033 | 0.395947148 | -1.336620226 | 1.93E-11 | 2.46E-10 | 1318.01381  | 2097.35036 | 1740.48046 | 618.5645311 | 744.9698283 | 677.6066547  | Stat2          |
| ENSMUSG000000071203 | 0.243304635 | -2.039164291 | 1.95E-11 | 2.49E-10 | 228.635049  | 287.833094 | 183.862318 | 71.04493083 | 41.17442496 | 58.36320091  | Naip5          |
| ENSMUSG000000039982 | 0.34131669  | -1.550816208 | 1.98E-11 | 2.52E-10 | 814.120098  | 972.514852 | 1249.76684 | 272.8125344 | 346.6312055 | 416.4560608  | Btdx4          |
| ENSMUSG000000074785 | 0.290639516 | -1.782697228 | 2.00E-11 | 2.53E-10 | 222.358793  | 236.750087 | 178.893066 | 76.7285253  | 59.36777552 | 49.46033976  | Plxnc1         |
| ENSMUSG000000002297 | 0.89243788  | -1.789642119 | 2.00E-11 | 2.54E-10 | 151.526758  | 199.420198 | 203.739325 | 44.52148999 | 61.28286505 | 54.40637373  | Dbf4           |
| ENSMUSG000000046546 | 0.467450044 | -1.097115901 | 2.06E-11 | 2.61E-10 | 1110.89736  | 1168.03259 | 1442.32535 | 520.0488937 | 642.5125383 | 575.7183548  | Fam43a         |
| ENSMUSG000000023055 | 2.023058852 | 1.016538289  | 2.09E-11 | 2.65E-10 | 1633.61984  | 1373.34698 | 1169.01649 | 2927.05115  | 2774.964733 | 2752.962511  | Calccoc1       |
| ENSMUSG000000035310 | 4.74924277  | 2.247697505  | 2.14E-11 | 2.71E-10 | 201.736808  | 212.19095  | 163.985311 | 477.4219352 | 1240.978017 | 1028.775067  | Lin50          |
| ENSMUSG000000074415 | 2.227718808 | 1.155567141  | 2.16E-11 | 2.72E-10 | 1995.84949  | 1448.98912 | 1361.575   | 3538.037556 | 5445.24607  | 3730.298824  | Gm210203C20Rik |
| ENSMUSG000000026630 | 0.142652241 | -2.809425679 | 2.17E-11 | 2.74E-10 | 82.4879394  | 160.125578 | 135.412113 | 23.68164361 | 17.2358058  | 12.85968834  | Batf3          |
| ENSMUSG000000023885 | 0.291838746 | -1.776756661 | 2.31E-11 | 2.91E-10 | 6029.68905  | 2841.98341 | 5545.68505 | 1388.691581 | 1330.029681 | 1488.756227  | Thbs2          |
| ENSMUSG000000055782 | 0.282167819 | -1.825374638 | 2.38E-11 | 2.99E-10 | 1251.66482  | 728.915207 | 773.960974 | 221.6601842 | 329.3953997 | 226.5238561  | Abcd2          |
| ENSMUSG000000096370 | 5.688783853 | 2.508120267  | 2.42E-11 | 3.04E-10 | 52.0032661  | 47.1535444 | 53.4194572 | 151.5625191 | 334.1831235 | 381.8338229  | Gm21992        |
| ENSMUSG000000070880 | 34.76070639 | 5.193885495  | 2.48E-11 | 3.11E-10 | 0.89660804  | 3.92946203 | 11.1808166 | 80.51758828 | 336.098213  | 115.737195   | Gad1           |
| ENSMUSG000000025255 | 0.378961571 | -1.399876535 | 2.51E-11 | 3.15E-10 | 1149.4515   | 724.985745 | 976.457986 | 399.7461442 | 622.6076758 | 356.1144462  | Zfhx4          |
| ENSMUSG000000079298 | 0.050709454 | -4.301601447 | 2.52E-11 | 3.16E-10 | 55.5896983  | 115.91913  | 94.4157849 | 8.5253917   | 0.957544766 | 3.956827181  | Klr1b          |
| ENSMUSG000000020889 | 2.643209854 | 1.40229097   | 2.55E-11 | 3.20E-10 | 1834.46004  | 2182.81616 | 3013.85124 | 5410.781932 | 7121.260428 | 6045.042725  | Nr1d1          |
| ENSMUSG000000090942 | 0.115127245 | -3.11869881  | 2.71E-11 | 3.40E-10 | 151.526758  | 357.581045 | 141.623677 | 27.47070659 | 31.59897229 | 15.827330872 | F830016B08Rik  |
| ENSMUSG000000041731 | 2.123204035 | 1.086243018  | 2.72E-11 | 3.40E-10 | 2755.2765   | 2376.34216 | 1895.76958 | 5315.108092 | 4714.95043  | 4897.562843  | Pgm5           |
| ENSMUSG000000026956 | 0.436276272 | -1.196686085 | 2.74E-11 | 3.42E-10 | 800.670977  | 900.82917  | 1119.32398 | 365.6445774 | 438.555503  | 425.3589219  | Uap11          |
| ENSMUSG000000030043 | 0.087782655 | -3.99920289  | 2.80E-11 | 3.50E-10 | 53.9964822  | 58.9419305 | 74.5387776 | 3.789062978 | 6.94033976  | 4.946033976  | Tacr1          |
| ENSMUSG000000067212 | 0.400009911 | -1.321892348 | 2.83E-11 | 3.53E-10 | 2584.92097  | 4186.84179 | 3104.54009 | 1191.660307 | 1373.119195 | 1385.87872   | H2-T23         |
| ENSMUSG000000010529 | 0.115232673 | -3.117378265 | 2.94E-11 | 3.66E-10 | 100.4201    | 120.830957 | 204.981638 | 25.5761751  | 12.44808196 | 10.88127475  | Gm266          |
| ENSMUSG000000024989 | 0.131457736 | -2.92732905  | 3.00E-11 | 3.73E-10 | 86.0743716  | 100.201282 | 70.8118387 | 6.630860211 | 11.4905372  | 15.827330872 | Cep55          |
| ENSMUSG000000059461 | 36.89920835 | 5.205517959  | 3.08E-11 | 3.82E-10 | 2.68982411  | 2.94709652 | 2.48462592 | 32.20703531 | 132.1411778 | 136.5105377  | Gm7331         |
| ENSMUSG000000020926 | 0.316290193 | 1.814054138  | 3.10E-11 | 3.85E-10 | 2753.740074 | 141.460633 | 183.862318 | 543.7305373 | 645.3851726 | 849.728637   | Adam11         |
| ENSMUSG000000027966 | 0.030958248 | -5.013532381 | 3.22E-11 | 3.99E-10 | 2169.79145  | 432.240823 | 744.15463  | 47.36328722 | 35.42915636 | 20.7733427   | Col11a1        |
| ENSMUSG000000043342 | 0.331645169 | -1.592287583 | 3.24E-11 | 4.02E-10 | 192.770728  | 278.009439 | 250.947218 | 75.78125956 | 87.13657375 | 76.16892323  | Hoxd9          |
| ENSMUSG000000010142 | 0.232841591 | -2.102579314 | 3.34E-11 | 4.14E-10 | 122.835301  | 191.561274 | 182.620005 | 47.36328722 | 34.47161159 | 33.63303103  | Tnfrsf13b      |
| ENSMUSG000000067672 | 2.274607672 | 1.856117728  | 3.36E-11 | 4.16E-10 | 587.278264  | 428.311361 | 637.306548 | 1187.871244 | 1268.746816 | 1299.817729  | Irs2           |
| ENSMUSG000000052957 | 0.47658337  | -1.06930554  | 3.36E-11 | 4.16E-10 | 4327.03039  | 3139.64016 | 4318.27985 | 1764.756082 | 1883.490556 | 1967.532316  | Gas1           |
| ENSMUSG000000035021 | 0.297668139 | -1.748223285 | 3.40E-11 | 4.20E-10 | 709.216957  | 1114.00249 | 1393.87514 | 331.5430106 | 354.2915636 | 271.0426619  | Baz1a          |
| ENSMUSG000000034205 | 0.35481891  | -1.494845196 | 3.48E-11 | 4.30E-10 | 2371.52826  | 2245.68755 | 3812.65847 | 897.06066   | 1050.426609 | 1042.623962  | Loxl2          |
| ENSMUSG000000027800 | 2.059056    | 1.041983067  | 3.70E-11 | 4.55E-10 | 4986.9339   | 4408.8564  | 4348.09536 | 8125.645556 | 8892.718246 | 11283.88191  | Tm4sf1         |
| ENSMUSG000000025352 | 0.285619436 | -1.807833941 | 3.75E-11 | 4.61E-10 | 196.35716   | 279.97417  | 318.032118 | 88.09571424 | 65.11304412 | 73.20130284  | Gdf11          |
| ENSMUSG000000028436 | 3.010651686 | 1.590075807  | 3.90E-11 | 4.79E-10 | 1089.37877  | 1254.48075 | 1359.09038 | 4613.184176 | 4084.885974 | 2447.297611  | Dcaf12         |
| ENSMUSG000000034354 | 2.123568057 | 1.086490346  | 4.10E-11 | 5.03E-10 | 1650.6554   | 1381.2059  | 1428.52452 | 2600.244469 | 3369.600033 | 3124.904266  | Mtmr3          |
| ENSMUSG000000025324 | 2.329466976 | 1.219999878  | 4.11E-11 | 5.04E-10 | 802.464193  | 622.819732 | 536.679198 | 1646.347864 | 1558.88288  | 1371.040618  | Atp10a         |
| ENSMUSG000000079523 | 0.321065367 | -1.639059758 | 4.14E-11 | 5.07E-10 | 4523.38755  | 6855.92888 | 9270.1393  | 2008.203378 | 2387.159103 | 2233.628943  | Tmsb10         |
| ENSMUSG000000089809 | 0.2793776   | -1.839711743 | 4.14E-11 | 5.07E-10 | 201.736808  | 246.573742 | 262.128034 | 88.09571424 | 52.66496215 | 57.37399412  | Rasgef1b       |
| ENSMUSG000000027221 | 0.315390776 | -1.664787628 | 4.21E-11 | 5.15E-10 | 579.208792  | 438.135016 | 785.14179  | 172.4023655 | 215.4475724 | 180.0356367  | Chst1          |
| ENSMUSG000000031380 | 2.020438589 | 1.014668502  | 4.32E-11 | 5.28E-10 | 488.65138   | 417.505341 | 500.652123 | 845.9083098 | 1055.214333 | 939.7464554  | Vegfd          |
| ENSMUSG000000079560 | 2.758868897 | 1.464076901  | 4.42E-11 | 5.39E-10 | 242.08417   | 186.649446 | 147.835242 | 584.4629643 | 534.3099797 | 477.786882   | Hoxa3          |
| ENSMUSG000000028664 | 0.352853564 | -1.502858512 | 4.60E-11 | 5.60E-10 | 469.822611  | 320.251155 | 419.90178  | 133.56447   | 126.3959092 | 167.1759484  | Ephb2          |
| ENSMUSG000000036019 | 2.507526584 | 1.326264996  | 4.75E-11 | 5.79E-10 | 381.058416  | 291.762556 | 264.61266  | 672.5586786 | 793.8046114 | 889.2969088  | Tmtc2          |
| ENSMUSG000000024379 | 0.167095805 | -2.581252578 | 4.87E-11 | 5.92E-10 | 67.2456028  | 93.3247232 | 105.596602 | 16.10351766 | 14.3631715  | 13.84889513  | Tslp           |
| ENSMUSG000000034641 | 0.276118817 | -1.856638884 | 4.87E-11 | 5.92E-10 | 349.677134  | 601.207691 | 582.644778 | 169.5605683 | 144.5892597 | 108.8127475  | Cd300ld        |
| ENSMUSG000          |             |              |          |          |             |            |            |             |             |              |                |

|                     |              |               |          |          |            |            |            |             |             |             |               |
|---------------------|--------------|---------------|----------|----------|------------|------------|------------|-------------|-------------|-------------|---------------|
| ENSMUSG00000018417  | 0.450917582  | -1.14906433   | 5.68E-11 | 6.78E-10 | 910.953766 | 639.519945 | 786.384103 | 355.2246542 | 347.5887502 | 351.1684123 | Myo1b         |
| ENSMUSG00000074896  | 0.188006595  | -2.411144827  | 5.69E-11 | 6.79E-10 | 1041.85854 | 2796.7946  | 2759.17708 | 418.6914591 | 526.6496215 | 294.7836249 | Ifit3         |
| ENSMUSG00000000275  | 0.364679155  | -1.455300355  | 5.76E-11 | 6.87E-10 | 1187.10904 | 1667.07427 | 2013.78931 | 677.2950073 | 571.6542256 | 525.2688082 | Trim25        |
| ENSMUSG000000029771 | 0.189415873  | -2.400370865  | 5.76E-11 | 6.87E-10 | 427.682034 | 858.587454 | 847.257438 | 197.9785406 | 117.7780063 | 88.03940477 | Irf5          |
| ENSMUSG00000074227  | 2.013011075  | 1.009355109   | 5.77E-11 | 6.87E-10 | 902.884293 | 1103.19646 | 1238.58602 | 2123.769799 | 2065.424061 | 2336.50645  | Spint2        |
| ENSMUSG00000027381  | 0.354018035  | -1.498105238  | 5.95E-11 | 7.07E-10 | 503.893717 | 428.311361 | 455.928856 | 214.0820582 | 141.7166254 | 135.5213309 | Bcl2l11       |
| ENSMUSG00000020486  | 0.461578812  | -1.115351095  | 6.21E-11 | 7.37E-10 | 504.790325 | 490.200388 | 550.344661 | 202.7148693 | 240.3437364 | 270.0534551 | 4-Sep         |
| ENSMUSG00000036036  | 0.485235593  | -1.043242717  | 6.44E-11 | 7.64E-10 | 494.031028 | 416.522975 | 432.32491  | 221.6601842 | 202.9994905 | 227.5175629 |               |
| ENSMUSG00000052629  | 3.206836248  | 1.681150687   | 6.61E-11 | 7.83E-10 | 43.0371858 | 56.9771994 | 57.1463961 | 175.2441627 | 147.461894  | 179.0464299 | Gm9885        |
| ENSMUSG00000010476  | 0.40789018   | -1.29374732   | 6.74E-11 | 7.97E-10 | 519.556154 | 447.958671 | 448.474978 | 197.9785406 | 218.3202067 | 202.787393  | Ebf3          |
| ENSMUSG00000019256  | 0.358975156  | -1.478044095  | 6.81E-11 | 8.05E-10 | 528.998742 | 461.711789 | 359.028445 | 167.6660368 | 183.8485952 | 133.5429173 | Ahr           |
| ENSMUSG00000020124  | 2.755997336  | 1.462574493   | 6.88E-11 | 8.13E-10 | 899.297861 | 994.153894 | 663.39512  | 1949.472902 | 2977.006679 | 2124.816196 | Usp15         |
| ENSMUSG000000087142 | 3.643673402  | 1.86539365    | 6.94E-11 | 8.19E-10 | 35.8643215 | 34.3827928 | 29.815511  | 115.5664208 | 136.9289016 | 113.7587814 | Gm12454       |
| ENSMUSG00000054556  | 3.440331894  | 1.782547751   | 6.94E-11 | 8.19E-10 | 45.7270099 | 39.2946203 | 47.2078925 | 137.3535329 | 173.8864464 | 179.0464299 | Gm4876        |
| ENSMUSG00000022425  | 0.403055552  | -1.3109494    | 7.03E-11 | 8.29E-10 | 1249.8716  | 860.552185 | 865.892133 | 401.6406757 | 437.5979583 | 361.0604802 | Enpp2         |
| ENSMUSG000000008845 | 0.441277684  | -1.180241306  | 7.26E-11 | 8.55E-10 | 563.966455 | 556.018877 | 422.386406 | 220.7129185 | 240.3437364 | 220.5931153 | Cd163         |
| ENSMUSG000000066278 | 2.654183433  | 1.40826808    | 7.29E-11 | 8.59E-10 | 199.046984 | 167.984502 | 124.231296 | 402.5879414 | 441.4281373 | 465.9164005 | Spas37b       |
| ENSMUSG00000038151  | 0.124827024  | -3.001997793  | 7.53E-11 | 8.86E-10 | 71.728643  | 112.972033 | 131.685174 | 16.10351766 | 16.27826103 | 6.924447566 | Pdm1          |
| ENSMUSG00000028035  | 2.698729934  | 1.432280612   | 7.67E-11 | 9.02E-10 | 2342.8368  | 1996.16671 | 1654.76086 | 4116.816925 | 5228.194425 | 6835.418954 | Dnajb4        |
| ENSMUSG00000043629  | 0.316149777  | -1.661319892  | 7.85E-11 | 9.22E-10 | 230.428266 | 287.833094 | 350.332254 | 74.83399381 | 105.3299243 | 93.97464554 | 1700019D03Rik |
| ENSMUSG00000035112  | 3.305407647  | 1.724828206   | 8.18E-11 | 9.58E-10 | 36.7609295 | 53.0477374 | 48.4502054 | 143.0371274 | 160.8675208 | 151.3486397 | Wnk4          |
| ENSMUSG00000039745  | 0.392475834  | -1.349324269  | 8.20E-11 | 9.60E-10 | 396.300752 | 501.006409 | 595.067907 | 178.08596   | 202.0419457 | 204.7658066 | Htatip2       |
| ENSMUSG00000041836  | 0.247152532  | -2.016526406  | 8.46E-11 | 9.90E-10 | 466.236179 | 726.950476 | 663.39512  | 204.6094008 | 159.909976  | 93.97464554 | Ptpre         |
| ENSMUSG00000028461  | 2.118457161  | 1.083013955   | 8.47E-11 | 9.91E-10 | 536.171606 | 649.3436   | 726.753081 | 1191.660307 | 1388.439911 | 1466.00447  | Ccdc107       |
| ENSMUSG00000001123  | 0.449907654  | -1.152299183  | 8.76E-11 | 1.02E-09 | 1224.76658 | 1286.89881 | 977.700299 | 587.3047616 | 539.0977035 | 444.153851  | Lgals9        |
| ENSMUSG00000025479  | 0.241163368  | -2.051917311  | 8.76E-11 | 1.02E-09 | 12864.5321 | 6202.65581 | 9306.16638 | 2886.318723 | 2531.748362 | 1424.457785 | Cyp2e1        |
| ENSMUSG00000078640  | 2.448985844  | 1.292184434   | 8.83E-11 | 1.03E-09 | 122.835301 | 112.972033 | 95.6580979 | 295.5469123 | 265.2399003 | 254.2261463 | Gm11627       |
| ENSMUSG00000053647  | 0.290251485  | -1.784624645  | 8.99E-11 | 1.05E-09 | 151.526758 | 136.548806 | 126.715922 | 44.52148999 | 32.55652206 | 43.52509899 | Gper1         |
| ENSMUSG00000044703  | 0.037621427  | -1.2432308759 | 9.06E-11 | 1.05E-09 | 38.5541456 | 82.5187026 | 58.3887091 | 2.841797233 | 1.915089533 | 1.97841359  | Pgf11a        |
| ENSMUSG00000057123  | 0.466623965  | -1.099667692  | 9.29E-11 | 1.08E-09 | 1638.99949 | 2060.02047 | 1606.31066 | 706.6602454 | 840.7243049 | 928.8651806 | Gja5          |
| ENSMUSG00000037872  | 0.373480029  | -1.420896996  | 9.58E-11 | 1.11E-09 | 304.846733 | 399.822762 | 396.297834 | 118.4082181 | 162.7826103 | 129.5860902 | Ackr1         |
| ENSMUSG000000101389 | 0.131663752  | -2.495069874  | 9.61E-11 | 1.12E-09 | 260.016331 | 247.556108 | 311.820553 | 17.99804914 | 66.07508888 | 23.74064554 | Ms4a4a        |
| ENSMUSG00000027359  | 22.06913136  | 4.463957941   | 9.72E-11 | 1.13E-09 | 10.7592964 | 12.7707516 | 4.96925184 | 446.1621656 | 89.05166328 | 100.8990931 | Slc27a2       |
| ENSMUSG00000041707  | 0.108284501  | -3.207101337  | 9.85E-11 | 1.14E-09 | 52.8998742 | 59.924296  | 74.5387776 | 6.630860211 | 8.617902898 | 9.494603976 | 1810011H11Rik |
| ENSMUSG00000040624  | 0.390140152  | -1.357935611  | 1.02E-10 | 1.18E-09 | 592.657912 | 444.029209 | 437.294162 | 184.7168202 | 168.5278789 | 222.5715289 | Plekkg1       |
| ENSMUSG00000069306  | 369.3240739  | 8.528743495   | 1.03E-10 | 1.19E-09 | 0          | 0          | 0          | 76.7285253  | 99.58465571 | 33.63303103 | Hist1h4m      |
| ENSMUSG00000048865  | 0.220835692  | -2.178956625  | 1.04E-10 | 1.20E-09 | 615.969721 | 978.436046 | 771.476348 | 269.9707372 | 117.7780063 | 134.5321241 | Arhgap30      |
| ENSMUSG00000094403  | 82.53166924  | 6.366875915   | 1.05E-10 | 1.22E-09 | 0          | 1.96473102 | 1.24231296 | 46.41602148 | 126.3959092 | 82.104164   | Mir692-2      |
| ENSMUSG00000026548  | 0.295009731  | -1.761165551  | 1.06E-10 | 1.23E-09 | 304.846733 | 579.595649 | 464.625047 | 124.0918125 | 127.3534539 | 146.4026057 | Slamf9        |
| ENSMUSG00000022105  | 0.2401904715 | 1.264178919   | 1.10E-10 | 1.27E-09 | 785.42864  | 641.484676 | 562.767771 | 1286.386881 | 1805.92943  | 1691.54362  | Rb1           |
| ENSMUSG000000015950 | 1.716977392  | -2.498363017  | 1.11E-10 | 1.28E-09 | 641.971355 | 1264.30441 | 941.673223 | 268.0762057 | 140.7590807 | 94.96385233 | Ncf1          |
| ENSMUSG00000032369  | 0.390254912  | -1.357511304  | 1.16E-10 | 1.33E-09 | 275.258667 | 295.692018 | 242.251027 | 118.4082181 | 110.1176481 | 89.02861156 | Plscr1        |
| ENSMUSG00000027316  | 2.68749425   | 1.426261668   | 1.16E-10 | 1.33E-09 | 105.799748 | 114.936764 | 139.139051 | 280.3906604 | 303.541691  | 379.8554093 | Gfra4         |
| ENSMUSG00000026042  | 0.402037594  | -1.314597683  | 1.18E-10 | 1.35E-09 | 20162.9215 | 11888.5874 | 13764.8276 | 5856.944098 | 6289.154026 | 6274.538702 | Ckl5a2        |
| ENSMUSG00000059288  | 2.955171361  | 1.56324179    | 1.21E-10 | 1.39E-09 | 320.985677 | 294.709652 | 377.66314  | 674.4532101 | 1189.2706   | 1069.332546 | Cdyl          |
| ENSMUSG00000029438  | 0.240397877  | 1.265424166   | 1.22E-10 | 1.40E-09 | 387.334672 | 264.256322 | 269.581912 | 781.4942392 | 745.9273731 | 691.4555498 | Bcl7a         |
| ENSMUSG00000036995  | 0.444934836  | -1.152212025  | 1.25E-10 | 1.43E-09 | 1078.61947 | 811.433909 | 798.807233 | 379.8535635 | 385.8905409 | 445.1430578 | Asap3         |
| ENSMUSG00000037649  | 0.217581384  | -2.200372969  | 1.26E-10 | 1.45E-09 | 416.922737 | 976.471315 | 691.968318 | 195.1367434 | 111.0751929 | 147.3918125 | H2-DMa        |
| ENSMUSG00000049580  | 0.443805544  | -1.172000404  | 1.29E-10 | 1.47E-09 | 541.551254 | 476.447271 | 643.518113 | 268.0762057 | 223.1079306 | 245.3232852 | Tsku          |
| ENSMUSG00000024673  | 23.79046283  | 4.572311434   | 1.36E-10 | 1.56E-09 | 8.96608037 | 8.84128957 | 8.69619071 | 438.5840397 | 51.70741739 | 140.4673649 | Ms4a1         |
| ENSMUSG00000020589  | 0.483032396  | -1.049808144  | 1.41E-10 | 1.61E-09 | 476.098868 | 456.799961 | 382.632391 | 209.3457295 | 214.4900277 | 212.679461  | Fam49a        |
| ENSMUSG00000035835  | 0.371240573  | -1.429573704  | 1.44E-10 | 1.64E-09 | 271.672235 | 244.609011 | 196.285448 | 86.20118275 | 91.92429758 | 87.05019797 | Pllpr3        |
| ENSMUSG00000039798  | 3.916878087  | 1.969704225   | 1.46E-10 | 1.67E-09 | 39.4507536 | 36.3475238 | 38.5117017 | 135.4590015 | 190.5514085 | 121.6724358 | 2600006K01Rik |
| ENSMUSG00000084796  | 0.129419276  | -2.949875584  | 1.53E-10 | 1.74E-09 | 76.2116831 | 216.120412 | 162.742998 | 21.78711212 | 16.27826103 | 20.7734277  | Mir142hg      |
| ENSMUSG00000022906  | 0.497610842  | -1.006910175  | 1.61E-10 | 1.82E-09 | 915.436806 | 1211.25667 | 1007.51581 | 507.734439  | 495.0506443 | 556.9234257 | Parp9         |
| ENSMUSG00000031897  | 0.332287999  | -1.589493905  | 1.70E-10 | 1.92E-09 | 823.982786 | 1446.04203 | 1309.39786 | 330.5957448 | 390.6782647 | 467.8948141 | Psmb10        |
| ENSMUSG00000044734  | 0.352944151  | -1.502488183  | 1.76E-10 | 1.99E-09 | 437.544722 | 613.636085 | 311.820553 | 151.5625191 | 192.4696179 | 145.4133989 | Serpinb1a     |
| ENSMUSG00000053519  | 4.290899816  | 2.101280217   | 1.77E-10 | 2.00E-09 | 19.7253768 | 20.6296757 | 27.3308851 | 91.88477721 | 92.88184235 | 102.8775067 | Kcnip1        |
| ENSMUSG000000807484 | 3.176640819  | 1.667501974   | 1.77E-10 | 2.01E-09 | 95.004519  | 61.889027  | 79.5080294 | 300.283241  | 222.1503858 | 229.4959765 | 2900089D17Rik |
| ENSMUSG00000024486  | 2.204571334  | 1.140498159   | 1.90E-10 | 2.14E-09 | 416.922737 | 276.270926 | 555.313893 | 933.0567583 | 1237.147838 | 1040.645548 | Hbegf         |
| ENSMUSG00000029082  | 0.254914372  | -1.971915379  | 1.96E-10 | 2.21E-09 | 272.568843 | 458.764692 | 327.970621 | 105.1464976 | 104.3723795 | 60.3416145  | Bst1          |
| ENSMUSG00000029695  | 7.296239423  | 2.867153072   | 1.97E-10 | 2.22E-09 | 16.1389447 | 14.7354826 | 22.3616333 | 194.1894776 | 86.17902898 | 104.8559203 | Aass          |
| ENSMUSG00000030157  | 0.420814835  | -1.24874253   | 2.02E-10 | 2.28E-09 | 1901.70565 | 2713.29353 | 3084.66308 | 1012.627081 | 1115.539653 | 1110.879231 | Clec2d        |
| ENSMUSG00000037443  | 0.45785694   | -1.127031206  | 2.03E-10 | 2.28E-09 | 1254.35464 | 1709.31598 | 1314.36711 | 602.4610135 | 741.1396492 | 615.2866266 | Cep85         |
| ENSMUSG00000028337  | 0.21399114   | -2.224377029  | 2.13E-10 | 2.40E-09 | 204.426632 | 323.198252 | 262.128034 | 70.09766509 | 67.02813365 | 31.65461744 | Coro2a        |
| ENSMUSG00000073640  | 37.03305973  | 5.210741847   | 2.18E-10 | 2.45E-09 | 0.89660804 | 2.94709652 | 1.24231296 | 48.31055297 | 47.87723832 | 92.98543874 | Rpl27-ps3     |
| ENSMUSG00000027200  | 0.437992449  | -1.191022096  | 2.19E-10 | 2.46E-09 | 1039.16871 | 736.774131 | 735.449272 | 371.3281718 | 374.4000037 | 355.1252395 | Sema6d        |
| ENSMUSG00000025584  | 0.428521039  |               |          |          |            |            |            |             |             |             |               |

|                    |             |              |          |          |            |            |            |             |             |             |               |
|--------------------|-------------|--------------|----------|----------|------------|------------|------------|-------------|-------------|-------------|---------------|
| ENSMUSG00000040111 | 0.392820236 | -1.348058844 | 2.99E-10 | 3.30E-09 | 470.719219 | 359.545776 | 342.878377 | 131.6699385 | 164.6976998 | 165.1975348 | Gramd1b       |
| ENSMUSG00000048327 | 0.289586453 | -1.787933981 | 3.13E-10 | 3.44E-09 | 117.455653 | 144.40773  | 124.231296 | 34.1015668  | 44.04705926 | 33.63303103 | Ckap2l        |
| ENSMUSG00000026890 | 0.460102003 | -1.119974357 | 3.20E-10 | 3.52E-09 | 346.98731  | 446.976306 | 382.632391 | 173.3496312 | 179.0608713 | 188.9384979 | Lhx6          |
| ENSMUSG00000027544 | 0.385845098 | -1.373906319 | 3.26E-10 | 3.58E-09 | 407.956657 | 490.200388 | 621.15648  | 176.1914285 | 221.192841  | 187.9492911 | Nfatc2        |
| ENSMUSG00000033386 | 0.360559396 | -1.471691158 | 3.29E-10 | 3.61E-09 | 490.444596 | 688.638221 | 864.64982  | 233.0273731 | 254.7069079 | 248.2909056 | Frrs1         |
| ENSMUSG00000026770 | 0.11127345  | -3.167818689 | 3.42E-10 | 3.75E-09 | 51.1066581 | 67.78322   | 80.7503423 | 6.630860211 | 10.53299243 | 4.946033976 | Il2ra         |
| ENSMUSG00000030102 | 2.180584072 | 1.124714614  | 3.44E-10 | 3.77E-09 | 4015.9074  | 3049.26254 | 2567.86089 | 7072.286048 | 6749.733059 | 7190.544194 | Itpr1         |
| ENSMUSG00000070056 | 2.033600392 | 1.024036213  | 3.48E-10 | 3.81E-09 | 685.00854  | 725.96811  | 946.642475 | 1605.615437 | 1495.684925 | 1686.597586 | Mfhass1       |
| ENSMUSG00000035711 | 0.354767892 | -1.495052649 | 3.51E-10 | 3.84E-09 | 260.912939 | 391.963838 | 352.81688  | 137.3535329 | 106.2874691 | 112.7695746 | Dok3          |
| ENSMUSG00000026579 | 23.89602873 | 4.578698972  | 3.65E-10 | 3.99E-09 | 54.6930903 | 40.2769858 | 37.2693888 | 2070.722917 | 754.545276  | 338.3087239 | F5            |
| ENSMUSG00000034738 | 0.375085758 | -1.414707611 | 3.68E-10 | 4.01E-09 | 199.046984 | 173.878695 | 166.469937 | 65.36133637 | 64.15549935 | 73.20130284 | Nostrin       |
| ENSMUSG00000037762 | 0.482303963 | -1.051985431 | 3.68E-10 | 4.01E-09 | 317.399245 | 296.673833 | 290.701232 | 143.0371274 | 154.1647074 | 139.4781581 | Slc16a9       |
| ENSMUSG00000035311 | 0.011541504 | -6.437024945 | 3.69E-10 | 4.02E-09 | 138.077638 | 54.0301029 | 57.1463961 | 2.841797233 | 0           | 0           | Brinp3        |
| ENSMUSG00000029335 | 3.772832342 | 1.915647991  | 3.69E-10 | 4.02E-09 | 108.489572 | 126.72515  | 69.5695257 | 413.0078646 | 467.281846  | 274.0102823 | Bmp3          |
| ENSMUSG00000085271 | 8.985202775 | 3.167551062  | 3.84E-10 | 4.18E-09 | 8.96608037 | 6.87655855 | 3.72693888 | 53.99414743 | 59.36777552 | 67.26606207 | E130006D01Rik |
| ENSMUSG00000036437 | 2.23605328  | 1.160955465  | 4.15E-10 | 4.50E-09 | 1789.62964 | 1316.36978 | 1249.76684 | 373.5941    | 3459.609241 | 3511.684123 | Npy1r         |
| ENSMUSG00000009772 | 0.239302508 | -2.06309258  | 4.19E-10 | 4.54E-09 | 134.491206 | 232.820625 | 229.827897 | 56.83594467 | 37.34424589 | 48.47113296 | Nuak3         |
| ENSMUSG00000024043 | 0.332508199 | -1.588538178 | 4.22E-10 | 4.57E-09 | 251.05025  | 185.667081 | 195.043135 | 75.78125956 | 57.45268599 | 77.15813002 | Arhgap28      |
| ENSMUSG00000032507 | 2.765204167 | 1.467386005  | 4.35E-10 | 4.71E-09 | 207.116457 | 142.442999 | 125.473609 | 396.9043469 | 478.7723832 | 443.1646442 | Fbxl2         |
| ENSMUSG00000029560 | 0.39475623  | -1.34096606  | 4.38E-10 | 4.74E-09 | 615.967721 | 752.491979 | 941.673223 | 301.2305067 | 349.5038398 | 260.1613871 | Snx8          |
| ENSMUSG00000038486 | 2.82262706  | 1.497038525  | 4.45E-10 | 4.81E-09 | 145.250502 | 88.4128957 | 99.3850367 | 301.2305067 | 320.7774968 | 321.4922084 | Sv2a          |
| ENSMUSG00000028064 | 0.328817464 | -1.604641172 | 4.57E-10 | 4.93E-09 | 436.648114 | 699.444241 | 527.983008 | 220.7129185 | 185.7636847 | 140.4673649 | Sema4a        |
| ENSMUSG00000036346 | 222.760664  | 7.799350688  | 4.57E-10 | 4.93E-09 | 0          | 0.98236551 | 0          | 61.57227339 | 82.34884991 | 102.8775067 | Gm6088        |
| ENSMUSG00000022010 | 2.664461074 | 1.413843756  | 4.67E-10 | 5.04E-09 | 6213.4937  | 5606.35995 | 6774.33257 | 12337.18906 | 22452.50968 | 14752.04094 | Tsc22d1       |
| ENSMUSG00000022969 | 0.495145802 | -1.014074687 | 4.89E-10 | 5.28E-09 | 824.879394 | 1072.74313 | 1079.56996 | 514.3652992 | 505.5836367 | 453.0567122 | Il10rb        |
| ENSMUSG00000005672 | 0.415881928 | -1.265754099 | 4.91E-10 | 5.29E-09 | 290.501004 | 285.868363 | 341.636064 | 138.3007987 | 136.9289016 | 105.8452171 | Kit           |
| ENSMUSG00000033610 | 3.271167972 | 1.709805842  | 5.27E-10 | 5.66E-09 | 108.489572 | 82.5187026 | 81.9926553 | 391.2207525 | 254.7069079 | 249.2801124 | Pank1         |
| ENSMUSG00000032496 | 0.008148013 | -6.939335958 | 5.54E-10 | 5.94E-09 | 230.428266 | 655.237794 | 63.3579609 | 0.947265744 | 3.830179066 | 2.967620385 | Ltf           |
| ENSMUSG00000032725 | 0.23059874  | -2.116543464 | 5.57E-10 | 5.97E-09 | 150.63015  | 159.143212 | 104.354289 | 23.68164361 | 31.59897729 | 40.5574786  | Folr2         |
| ENSMUSG00000022842 | 0.390925289 | -1.355035179 | 5.95E-10 | 6.37E-09 | 463.546355 | 322.215886 | 458.413482 | 172.4023655 | 142.6741702 | 171.1327756 | Ece2          |
| ENSMUSG00000014592 | 2.247650104 | 1.168417466  | 6.01E-10 | 6.43E-09 | 290.501004 | 351.686852 | 344.12069  | 615.7227339 | 874.2383178 | 725.0885808 | Camta1        |
| ENSMUSG00000049907 | 2.468321169 | 1.303530125  | 6.27E-10 | 6.69E-09 | 661.696731 | 559.948339 | 761.537844 | 1248.496251 | 1684.321244 | 1959.618661 | Rasl11b       |
| ENSMUSG00000040612 | 0.496262629 | -1.010824279 | 6.45E-10 | 6.88E-09 | 1234.62927 | 1001.03045 | 905.646147 | 518.1543622 | 492.17801   | 549.9989781 | Illdr2        |
| ENSMUSG00000005973 | 0.485277582 | -1.04311788  | 6.56E-10 | 6.99E-09 | 3057.43341 | 2776.16492 | 3943.10133 | 1426.582211 | 1653.679812 | 1662.856623 | Rcn1          |
| ENSMUSG00000011171 | 2.441699217 | 1.287885491  | 6.59E-10 | 7.01E-09 | 112.076005 | 83.5010681 | 105.966602 | 243.4472963 | 238.1829735 | 258.1613871 | Vipr2         |
| ENSMUSG00000051906 | 0.297518018 | -1.748951053 | 6.61E-10 | 7.03E-09 | 124.628517 | 188.614177 | 154.046807 | 45.46875573 | 44.04705926 | 49.46033976 | Cd209f        |
| ENSMUSG00000021998 | 0.230849489 | -1.214975556 | 6.64E-10 | 7.07E-09 | 2624.37172 | 3867.573   | 3380.33356 | 1212.500153 | 632.9370906 | 433.2725763 | Lcp1          |
| ENSMUSG00000024440 | 0.269898228 | -1.889512591 | 6.66E-10 | 7.08E-09 | 169.458919 | 110.024937 | 137.896738 | 36.94336403 | 42.13196972 | 33.6303013  | Pcdh12        |
| ENSMUSG00000055775 | 0.077869175 | -3.682803849 | 6.92E-10 | 7.36E-09 | 106.696356 | 376.245989 | 377.66314  | 37.89062978 | 21.06598486 | 7.913654361 | Myh8          |
| ENSMUSG00000020695 | 0.451563258 | -1.146999991 | 6.98E-10 | 7.41E-09 | 3346.14119 | 2835.10685 | 4463.63046 | 1658.662319 | 1519.623544 | 1627.245178 | Mrc2          |
| ENSMUSG00000047907 | 0.327101602 | -1.612189272 | 7.02E-10 | 7.45E-09 | 918.12663  | 1254.48075 | 1865.95406 | 408.2715359 | 483.5601071 | 428.3265423 | Tshz2         |
| ENSMUSG00000091649 | 0.170155123 | -2.55507751  | 7.12E-10 | 7.54E-09 | 142.560678 | 382.140182 | 335.424499 | 48.31055297 | 62.24040982 | 35.61144462 | Phf11b        |
| ENSMUSG00000093843 | 236.0494873 | 7.882945339  | 7.14E-10 | 7.57E-09 | 0          | 0          | 0          | 42.6269585  | 41.17442496 | 50.44954655 | Gm25939       |
| ENSMUSG00000027698 | 0.438778051 | -1.188436735 | 7.34E-10 | 7.77E-09 | 377.471984 | 531.45974  | 496.925184 | 197.0312748 | 213.5324829 | 205.7550134 | Nceh1         |
| ENSMUSG00000007888 | 0.383820305 | -1.381497059 | 7.53E-10 | 7.96E-09 | 1149.4515  | 1003.97755 | 1446.05228 | 357.1191857 | 566.8665017 | 457.0135394 | Crif1         |
| ENSMUSG00000046879 | 0.352691141 | -1.503522755 | 7.65E-10 | 8.08E-09 | 855.364067 | 1663.1448  | 1263.43228 | 449.9512286 | 439.5130478 | 444.153851  | Irgm1         |
| ENSMUSG00000027596 | 0.232207996 | -2.106510445 | 7.68E-10 | 8.11E-09 | 156.906406 | 164.05504  | 93.1734719 | 29.36523808 | 34.47161159 | 64.3824244  | Ear2          |
| ENSMUSG00000062591 | 2.161231775 | 1.111853798  | 8.02E-10 | 8.46E-09 | 211.599497 | 231.83826  | 249.704905 | 465.1074805 | 448.1309507 | 582.6428023 | Tubb4a        |
| ENSMUSG00000021908 | 7.923330229 | 2.986106932  | 9.10E-10 | 9.60E-09 | 8.96608037 | 5.89419305 | 9.93850367 | 49.25781871 | 76.60358132 | 69.24447566 | Gm6768        |
| ENSMUSG00000029231 | 0.480694829 | -1.056806811 | 9.12E-10 | 9.62E-09 | 3663.54044 | 2786.97094 | 2826.26198 | 1283.545084 | 1479.406664 | 1697.47886  | Pdgfra        |
| ENSMUSG00000022876 | 0.194240109 | -2.364086962 | 9.23E-10 | 9.72E-09 | 110.282789 | 251.48557  | 173.923814 | 35.04883255 | 40.21688019 | 28.6869706  | Samsn1        |
| ENSMUSG00000025930 | 0.125017184 | -2.99980168  | 9.48E-10 | 9.98E-09 | 83.3845474 | 52.0653719 | 64.6002739 | 7.578125956 | 11.4905372  | 5.935240771 | Msc           |
| ENSMUSG00000062753 | 0.415517552 | -1.267018677 | 9.49E-10 | 9.98E-09 | 325.468717 | 372.316527 | 477.048176 | 158.1933793 | 161.8250655 | 167.1759484 | Al413582      |
| ENSMUSG00000018899 | 0.433873038 | -1.204655157 | 9.61E-10 | 1.01E-08 | 1190.69547 | 1912.66564 | 1626.18766 | 704.7657139 | 705.7104929 | 641.0060032 | Irf1          |
| ENSMUSG00000090257 | 3.819132917 | 1.933245131  | 9.66E-10 | 1.01E-08 | 34.9677134 | 35.3651583 | 21.1193203 | 107.9882949 | 120.6506406 | 124.6400562 | Gm4524        |
| ENSMUSG00000086946 | 10.29467594 | 3.363826512  | 9.75E-10 | 1.02E-08 | 6.27625626 | 2.94709652 | 6.2115648  | 56.83594467 | 53.62250692 | 47.48192617 | Gm15527       |
| ENSMUSG00000079553 | 0.227666806 | -2.135004134 | 9.85E-10 | 1.03E-08 | 89.668037  | 114.936764 | 102.67235  | 17.0507834  | 29.68388776 | 22.75175629 | Kifc1         |
| ENSMUSG00000046167 | 2.10085061  | 1.070973577  | 9.91E-10 | 1.04E-08 | 291.397612 | 247.556108 | 212.435516 | 556.9922577 | 493.1355547 | 533.1824626 | Gldn          |
| ENSMUSG00000105746 | 13.75415915 | 3.781796039  | 9.98E-10 | 1.04E-08 | 8.06947233 | 5.89419305 | 0          | 56.83594467 | 71.81585748 | 74.19050963 | Gm43595       |
| ENSMUSG00000042099 | 0.494149538 | -1.016980404 | 1.01E-09 | 1.06E-08 | 1718.79761 | 1476.49536 | 1298.21704 | 689.609462  | 847.4271183 | 684.5311022 | Kank3         |
| ENSMUSG00000047205 | 0.4225518   | -1.242799884 | 1.02E-09 | 1.06E-08 | 248.360426 | 243.626646 | 267.097286 | 89.04297998 | 115.8629167 | 115.737195  | Dusp18        |
| ENSMUSG00000026203 | 2.12902184  | 1.07922598   | 1.05E-09 | 1.09E-08 | 800.670977 | 973.524218 | 1113.11241 | 1724.023655 | 2203.310508 | 2168.341295 | Dnajb2        |
| ENSMUSG00000015396 | 0.208494062 | -2.261921802 | 1.05E-09 | 1.09E-08 | 208.013065 | 351.686852 | 386.35933  | 97.56837168 | 45.96214879 | 53.41716694 | Rfn2          |
| ENSMUSG00000030107 | 0.237307961 | -2.075167595 | 1.07E-09 | 1.11E-08 | 234.014698 | 529.495009 | 488.228993 | 89.04297998 | 119.6930958 | 88.03940477 | Usp18         |
| ENSMUSG00000024072 | 2.685823055 | 1.425364262  | 1.08E-09 | 1.12E-08 | 1136.00238 | 1074.70787 | 1329.27487 | 2192.920198 | 4089.673697 | 3222.835739 | Yipf4         |
| ENSMUSG00000070327 | 0.422810009 | -1.241918566 | 1.08E-09 | 1.12E-08 | 2436.08404 | 2919.59029 | 1846.07706 | 1167.031397 | 890.5166328 | 988.2175883 | Rnf213        |
| ENSMUSG00000044712 | 0.473360467 | -1.07898887  | 1.09E-09 | 1.13E-08 | 513.756405 | 409.646417 | 453.44423  | 237.7637019 | 221.192841  | 192.8953251 | Slc38a6       |
| ENSMUSG00000030793 | 0.335709466 | -1.574714876 | 1.09E-09 | 1.13E-08 | 238.497738 | 376.245989 | 329.212934 | 123.1445468 | 105         |             |               |

|                     |              |              |          |          |            |              |            |             |             |             |               |
|---------------------|--------------|--------------|----------|----------|------------|--------------|------------|-------------|-------------|-------------|---------------|
| ENSMUSG00000090084  | 0.363189072  | -1.461207302 | 1.43E-09 | 1.46E-08 | 1662.3113  | 989.242066   | 1243.55527 | 368.4863746 | 538.1401587 | 508.4522927 | Srpx          |
| ENSMUSG00000067158  | 2.553044643  | 1.352218765  | 1.46E-09 | 1.49E-08 | 293.190828 | 200.402564   | 193.800822 | 510.5762363 | 583.1447628 | 665.7361731 | Col4a4        |
| ENSMUSG00000051262  | 0.15905051   | -2.652443097 | 1.47E-09 | 1.50E-08 | 95.93706   | 62.8713925   | 64.6002739 | 13.26172042 | 13.40562673 | 8.902861156 | Nat8f3        |
| ENSMUSG00000016107  | 0.4951561073 | -1.024557423 | 1.51E-09 | 1.54E-08 | 4048.18529 | 5632.88382   | 5985.46384 | 2514.043286 | 2625.58775  | 2560.067186 | Ctss          |
| ENSMUSG00000049538  | 0.065213598  | -3.938683375 | 1.55E-09 | 1.58E-08 | 135.387814 | 34.3827928   | 110.565853 | 6.630860211 | 7.660358132 | 3.956827181 | Adams16       |
| ENSMUSG00000026480  | 0.31874529   | -1.653470675 | 1.56E-09 | 1.59E-08 | 591.761304 | 1164.10313   | 921.796216 | 341.9629338 | 256.6219974 | 252.2477328 | Ncf2          |
| ENSMUSG00000030278  | 0.332168007  | -1.590014969 | 1.63E-09 | 1.66E-08 | 5810.02008 | 3108.20447   | 5917.13662 | 1624.560752 | 1945.730965 | 1357.191723 | Cidec         |
| ENSMUSG00000031871  | 0.47697836   | -1.06800428  | 1.68E-09 | 1.71E-08 | 4880.23755 | 3972.68611   | 3256.10227 | 1807.38304  | 1846.14631  | 2123.826989 | Cdh5          |
| ENSMUSG00000052221  | 14.12592655  | 3.820273595  | 1.70E-09 | 1.72E-08 | 6.27625626 | 0.98236551   | 3.72693888 | 49.25781871 | 51.70741739 | 56.38478732 | Ppp1r36       |
| ENSMUSG00000044669  | 0.298193009  | -1.745681658 | 1.71E-09 | 1.73E-08 | 148.836934 | 114.936764   | 157.773746 | 35.04883255 | 42.13196972 | 48.47113296 | Tnfalp81      |
| ENSMUSG00000031700  | 0.408424809  | -1.291857592 | 1.72E-09 | 1.74E-08 | 673.352636 | 977.45368    | 790.111042 | 357.1191857 | 374.4000037 | 265.1074211 | Gpt2          |
| ENSMUSG00000030117  | 0.009805129  | -6.672247606 | 1.76E-09 | 1.78E-08 | 53.7964822 | 74.6597786   | 68.3272128 | 0           | 1.915089533 | 0           | Gdf3          |
| ENSMUSG00000092035  | 4.308268848  | 2.107108281  | 1.81E-09 | 1.83E-08 | 59.1761304 | 43.2240823   | 50.9348313 | 267.1289399 | 261.4097212 | 132.5537105 | Peg10         |
| ENSMUSG00000023905  | 2.778860602  | 1.474493466  | 1.84E-09 | 1.86E-08 | 609.693465 | 737.463055   | 988.881116 | 1582.881059 | 2517.385191 | 2405.750926 | Tnfrsf12a     |
| ENSMUSG00000027495  | 2.49896438   | 1.321330337  | 1.86E-09 | 1.87E-08 | 321.882285 | 321.233521   | 316.789805 | 610.9864052 | 1031.275713 | 756.7431983 | Fam210b       |
| ENSMUSG00000030638  | 0.225700173  | -2.147520569 | 1.88E-09 | 1.89E-08 | 115.662437 | 111.007302   | 120.504357 | 15.15625191 | 30.64143253 | 32.64382424 | Sh3g3         |
| ENSMUSG00000078517  | 0.203675672  | 1.025507727  | 1.88E-09 | 1.89E-08 | 773.772736 | 757.403806   | 540.406137 | 1450.263855 | 1365.458837 | 1407.641269 | Emc1          |
| ENSMUSG00000031616  | 0.39269941   | -1.348502665 | 1.88E-09 | 1.89E-08 | 2214.62185 | 1332.08763   | 1375.24045 | 629.9317201 | 691.3473214 | 612.3190062 | Ednra         |
| ENSMUSG00000042216  | 0.305083454  | -1.712724158 | 1.90E-09 | 1.91E-08 | 175.735175 | 158.160847   | 116.777418 | 42.6269585  | 49.79232786 | 45.50351258 | Sgsm1         |
| ENSMUSG00000032400  | 5.645789605  | 2.497175367  | 1.92E-09 | 1.93E-08 | 98.6268841 | 89.3952612   | 55.9040832 | 211.240261  | 535.2675244 | 635.0707625 | Zwilch        |
| ENSMUSG00000018930  | 0.044999676  | -4.473941592 | 1.96E-09 | 1.97E-08 | 32.2778893 | 170.931598   | 95.6580979 | 6.630860211 | 4.787723832 | 1.97841359  | Ccl4          |
| ENSMUSG00000002007  | 4.314539755  | 2.109206671  | 2.10E-09 | 2.10E-08 | 91.4540198 | 238.714818   | 104.354289 | 635.6153145 | 581.2296732 | 659.8009324 | Srpk3         |
| ENSMUSG00000022440  | 0.401833942  | -1.315328665 | 2.10E-09 | 2.10E-08 | 1871.22097 | 1761.38136   | 2716.93844 | 749.2872039 | 775.6112608 | 1025.807447 | C1qtnf6       |
| ENSMUSG00000028312  | 0.448499742  | -1.15682094  | 2.10E-09 | 2.10E-08 | 487.754772 | 575.666187   | 638.548861 | 290.8105835 | 213.5324829 | 258.1829735 | Smc2          |
| ENSMUSG00000034795  | 0.251723622  | -1.990087489 | 2.12E-09 | 2.11E-08 | 91.4540198 | 118.866226   | 119.262044 | 35.04883255 | 22.98107439 | 24.73016988 | Cdc122        |
| ENSMUSG00000062488  | 0.221748597  | -2.173003116 | 2.13E-09 | 2.12E-08 | 131.812813 | 737.756496   | 516.802191 | 134.5117357 | 137.8864464 | 75.17971643 | Ifitb3        |
| ENSMUSG00000027832  | 0.126937299  | -2.977812041 | 2.21E-09 | 2.20E-08 | 121.042085 | 241.661915   | 427.355658 | 25.5761751  | 49.79232786 | 24.73016988 | Ptx3          |
| ENSMUSG00000028803  | 0.2351889767 | 1.233820443  | 2.21E-09 | 2.20E-08 | 335.331406 | 369.369431   | 249.704905 | 838.3301838 | 779.4414399 | 631.1139353 | Nipal3        |
| ENSMUSG00000026437  | 0.234036719  | -2.095193195 | 2.22E-09 | 2.20E-08 | 144.353894 | 177.808157   | 113.050479 | 46.41602148 | 25.85703869 | 29.6720385  | Ckd18         |
| ENSMUSG00000073759  | 23.52658054  | 4.556219743  | 2.23E-09 | 2.22E-08 | 2.68982411 | 0.98236551   | 2.48462592 | 40.73242701 | 40.21688019 | 63.30923489 | 4933407E24Rik |
| ENSMUSG00000020120  | 3.884703066  | 1.957804328  | 2.25E-09 | 2.23E-08 | 897.504665 | 1255.46312   | 1187.65119 | 277.383163  | 6897.194953 | 3300.983075 | Plek          |
| ENSMUSG00000043251  | 0.333056775  | -1.586159967 | 2.26E-09 | 2.24E-08 | 117.455653 | 134.953499   | 113.050479 | 36.94336403 | 38.25933542 | 38.5906501  | Ecoc3l        |
| ENSMUSG00000038754  | 154.9269679  | 7.275444483  | 2.27E-09 | 2.25E-08 | 0.89660804 | 0.98236551   | 0          | 202.7148693 | 61.28286505 | 48.47113296 | Elovl3        |
| ENSMUSG00000022987  | 2.463200521  | 1.300534078  | 2.31E-09 | 2.29E-08 | 147.043718 | 157.178481   | 100.62735  | 341.015668  | 320.7774968 | 340.2871375 | Zfp641        |
| ENSMUSG00000024158  | 3.35251965   | 1.7345245788 | 2.33E-09 | 2.31E-08 | 435.751506 | 335.353933   | 467.109673 | 1042.939585 | 2373.753476 | 1411.598097 | Haghl         |
| ENSMUSG00000008004  | 2.535483767  | 1.342261038  | 2.35E-09 | 2.33E-08 | 816.809922 | 608.084249   | 529.225321 | 1281.650552 | 1821.250146 | 1856.741154 | Usp32         |
| ENSMUSG00000037466  | 0.197032992  | -2.343490872 | 2.39E-09 | 2.36E-08 | 67.2456028 | 93.3247232   | 79.5080294 | 17.99804914 | 11.4905372  | 17.80572231 | Tedc1         |
| ENSMUSG00000039987  | 2.615238944  | 1.386942766  | 2.41E-09 | 2.38E-08 | 127.149118 | 1155.26184   | 626.125731 | 2146.504177 | 2253.102835 | 2164.384468 | Phtf2         |
| ENSMUSG00000032118  | 2.412963097  | 1.270805851  | 2.41E-09 | 2.38E-08 | 182.90804  | 204.332026   | 168.954562 | 527.6270197 | 461.5365774 | 354.1360327 | Fez1          |
| ENSMUSG00000018983  | 0.4061914608 | 2.022159911  | 2.43E-09 | 2.40E-08 | 117.455653 | 219.067508   | 126.715922 | 826.0157292 | 653.0455307 | 403.5963724 | E2f2          |
| ENSMUSG00000028789  | 0.385959622  | -1.373478169 | 2.55E-09 | 2.51E-08 | 288.707788 | 304.533037   | 421.144093 | 115.5664208 | 154.5892597 | 130.575297  | Azin2         |
| ENSMUSG00000048078  | 0.430117128  | -1.217198511 | 2.56E-09 | 2.52E-08 | 317.399245 | 335.969004   | 401.267086 | 125.986344  | 158.9524312 | 168.1651552 | Tenm4         |
| ENSMUSG00000047414  | 0.412551774  | -1.277352909 | 2.71E-09 | 2.67E-08 | 1326.97989 | 875.287667   | 836.076622 | 416.7969276 | 395.4659885 | 442.1754374 | Flrt2         |
| ENSMUSG00000028678  | 0.189541866  | -2.399411551 | 2.76E-09 | 2.71E-08 | 65.4523867 | 67.405302    | 70.8118387 | 12.31445468 | 18.19355056 | 11.87048154 | Kif2c         |
| ENSMUSG00000026271  | 0.188988231  | -2.403631702 | 2.83E-09 | 2.78E-08 | 102.213316 | 170.931598   | 108.081227 | 34.1015668  | 21.06598486 | 16.81651552 | Gpr35         |
| ENSMUSG00000022180  | 0.347568253  | -1.524631783 | 2.84E-09 | 2.79E-08 | 217.875753 | 319.26879    | 327.970621 | 82.41211977 | 111.0751929 | 106.8343339 | Sclt7a8       |
| ENSMUSG00000027868  | 0.332959652  | -1.586580733 | 2.93E-09 | 2.87E-08 | 709.216957 | 1419.51816   | 965.277169 | 304.072304  | 389.7207199 | 336.3303103 | Tbx15         |
| ENSMUSG00000052229  | 4.432426466  | 2.148096697  | 2.94E-09 | 2.88E-08 | 156.009798 | 72.6950476   | 55.9040832 | 416.7969276 | 411.7442496 | 440.1970238 | Gpr17         |
| ENSMUSG00000026697  | 0.335765457  | -1.574474279 | 2.96E-09 | 2.90E-08 | 401.680401 | 260.32686    | 300.639736 | 83.35938551 | 124.4808196 | 115.737195  | Myoc          |
| ENSMUSG00000036459  | 2.047478454  | 1.033848271  | 3.06E-09 | 2.99E-08 | 1295.59861 | 1497.12503   | 1947.94672 | 3146.816803 | 3439.500801 | 3113.033784 | Wtip          |
| ENSMUSG00000073758  | 2.315585841  | 1.211377224  | 3.18E-09 | 3.10E-08 | 162.286055 | 139.495902   | 127.958235 | 386.4844237 | 301.6266014 | 309.6217269 | Sh3d21        |
| ENSMUSG00000085419  | 3.322843001  | 1.73241813   | 3.25E-09 | 3.17E-08 | 46.6236179 | 34.3827928   | 49.6925184 | 124.0918125 | 138.8439911 | 170.1435688 | Gm11734       |
| ENSMUSG000000021719 | 2.144867186  | 1.100888316  | 3.26E-09 | 3.18E-08 | 1370.91369 | 994.153894   | 914.342338 | 2585.088217 | 2251.187746 | 2202.963533 | Rgs7bp        |
| ENSMUSG00000022861  | 2.635911744  | 1.398302067  | 3.28E-09 | 3.20E-08 | 1370.91369 | 166.019771   | 130.442861 | 425.3223193 | 434.725324  | 288.8483842 | Dgk           |
| ENSMUSG00000082101  | 210.0037104  | 7.714271007  | 3.29E-09 | 3.20E-08 | 0          | 0.98236551   | 0          | 61.57227339 | 124.4808196 | 46.49271937 | Sifn14        |
| ENSMUSG00000028681  | 0.368371962  | -1.440764837 | 3.37E-09 | 3.27E-08 | 442.92437  | 386.069644   | 278.278103 | 125.0390783 | 125.4383644 | 158.2730872 | Ptch2         |
| ENSMUSG00000068744  | 0.31665231   | -1.659028395 | 3.37E-09 | 3.27E-08 | 144.353894 | 132.619344   | 174.74667  | 33.15430106 | 48.83478309 | 44.51430578 | Pscr1         |
| ENSMUSG00000004885  | 0.042277794  | -4.563956085 | 3.42E-09 | 3.31E-08 | 32.2778893 | 104.130744   | 228.585584 | 3.789062978 | 8.617902898 | 2.967620385 | Crap2         |
| ENSMUSG00000023013  | 0.05198758   | -3.248810426 | 3.42E-09 | 3.32E-08 | 68.1422108 | 113.954399   | 249.704905 | 12.31445468 | 20.1084401  | 12.85968834 | Aqp2          |
| ENSMUSG00000028965  | 0.07835966   | -3.674181348 | 3.45E-09 | 3.35E-08 | 46.6236179 | 49.1182754   | 64.6002739 | 1.894531489 | 7.660358132 | 2.967620385 | Tnfrsf9       |
| ENSMUSG00000005410  | 0.401898712  | -1.315096142 | 3.48E-09 | 3.37E-08 | 261.809547 | 263.273956   | 237.281775 | 119.3554838 | 80.43376038 | 106.8343339 | Mcm5          |
| ENSMUSG00000023274  | 0.211525476  | -2.241096664 | 3.48E-09 | 3.37E-08 | 138.974246 | 178.790522   | 186.346944 | 44.52148999 | 44.04705926 | 17.80572231 | Cd4           |
| ENSMUSG00000032723  | 2.372733064  | 1.246549804  | 3.65E-09 | 3.53E-08 | 294.984044 | 212.19095    | 204.981638 | 649.8243007 | 534.3099797 | 509.4414995 | Car11         |
| ENSMUSG00000053398  | 0.38732951   | -1.368366674 | 3.75E-09 | 3.62E-08 | 806.947233 | 492.165119   | 745.387776 | 235.8691704 | 298.7539671 | 257.1937667 | Phgdh         |
| ENSMUSG00000014786  | 0.389349975  | -1.360860561 | 3.77E-09 | 3.64E-08 | 169.458919 | 216.120412   | 188.83157  | 73.88672807 | 82.34884991 | 67.26606207 | Sclt9a5       |
| ENSMUSG00000065637  | 29.36850719  | 4.87619803   | 3.95E-09 | 3.82E-08 | 3.58643215 | 0            | 4.96925184 | 43.57422425 | 56.49514122 | 144.4241921 | Gm26397       |
| ENSMUSG00000049502  | 0.471766793  | -1.083854222 | 3.97E-09 | 3.83E-08 | 758.530399 | 1088.46098   | 967.761795 | 490.6836556 | 427.0649658 | 409.5316132 | Dtx3l         |
| ENSMUSG00000044177  | 2.696879312  | -1.431290961 | 4.01E-09 | 3.86E-08 | 54.6930903 | 55.0124684</ |            |             |             |             |               |

|                    |             |              |          |          |            |            |            |             |             |             |               |
|--------------------|-------------|--------------|----------|----------|------------|------------|------------|-------------|-------------|-------------|---------------|
| ENSMUSG00000069862 | 9.409815499 | 3.234166436  | 4.87E-09 | 4.63E-08 | 10.7592964 | 15.7178481 | 36.0270758 | 88.09571424 | 222.1503858 | 269.0642483 | Rps12-ps9     |
| ENSMUSG00000043099 | 0.457520273 | -1.128092422 | 5.13E-09 | 4.86E-08 | 621.34937  | 495.112216 | 560.283145 | 258.6035482 | 297.7964224 | 210.7010474 | Hic1          |
| ENSMUSG00000026452 | 4.21168941  | 2.074399049  | 5.41E-09 | 5.13E-08 | 51.1066581 | 34.3827928 | 24.8462592 | 119.3554838 | 180.0184611 | 170.1435688 | Syt2          |
| ENSMUSG00000016995 | 0.123201882 | -3.020903804 | 5.43E-09 | 5.15E-08 | 596.244345 | 119.848592 | 311.820553 | 34.1015668  | 40.21688019 | 52.42796014 | Matn4         |
| ENSMUSG00000039683 | 0.299845106 | -1.737710669 | 5.45E-09 | 5.16E-08 | 95.93706   | 124.760419 | 130.442861 | 35.99609829 | 37.34424589 | 31.65461744 | Sdk1          |
| ENSMUSG00000021806 | 0.281745918 | -1.827533388 | 5.59E-09 | 5.29E-08 | 1169.17688 | 636.572849 | 504.379061 | 197.9785406 | 226.9381096 | 226.5283561 | Nid2          |
| ENSMUSG00000050103 | 0.447360518 | -1.160490157 | 5.63E-09 | 5.33E-08 | 415.129521 | 307.480044 | 326.728308 | 150.6152534 | 151.2920731 | 168.1651552 | Agmo          |
| ENSMUSG00000049723 | 0.033478745 | -4.900610728 | 5.73E-09 | 5.41E-08 | 1095.65502 | 3507.04486 | 1492.01786 | 56.83594467 | 126.3959092 | 20.7733427  | Mmp12         |
| ENSMUSG00000034245 | 2.083539546 | 1.059036483  | 5.78E-09 | 5.46E-08 | 242.08417  | 229.873529 | 185.104631 | 438.5840397 | 424.1923315 | 510.4307063 | Hdac11        |
| ENSMUSG00000055435 | 0.37580172  | -1.411956426 | 5.91E-09 | 5.57E-08 | 3092.40112 | 5027.74667 | 6072.42574 | 1640.664269 | 1965.839406 | 1726.165858 | Maf           |
| ENSMUSG00000030306 | 2.427217581 | 1.27930344   | 5.99E-09 | 5.64E-08 | 2403.80615 | 1888.10651 | 1413.75215 | 5464.77608  | 4317.569352 | 4072.564376 | Tmtc1         |
| ENSMUSG00000001517 | 0.320645139 | -1.64095056  | 6.02E-09 | 5.67E-08 | 145.250502 | 198.437833 | 146.592929 | 42.6269585  | 60.32532029 | 54.40637373 | Foxm1         |
| ENSMUSG00000042453 | 0.318402347 | -1.651077124 | 6.07E-09 | 5.72E-08 | 1203.24799 | 720.073917 | 580.160152 | 238.7109676 | 293.9662433 | 265.1074211 | Reln          |
| ENSMUSG00000031344 | 9.519761275 | 3.250925396  | 6.20E-09 | 5.82E-08 | 11.6559045 | 6.87655855 | 12.4231296 | 162.929708  | 69.8657842  | 62.32002809 | Gabqr         |
| ENSMUSG00000038216 | 64.34317485 | 6.007715219  | 6.57E-09 | 6.16E-08 | 0          | 1.96473102 | 1.24231296 | 40.73242701 | 114.905372  | 43.52509899 | Pnmt          |
| ENSMUSG00000063632 | 0.058567592 | -4.093753612 | 6.58E-09 | 6.17E-08 | 34.9677134 | 55.9948339 | 140.381364 | 4.736328722 | 4.787723832 | 3.956827181 | Socx11        |
| ENSMUSG00000001661 | 0.469882847 | -1.089626991 | 6.67E-09 | 6.24E-08 | 641.074746 | 569.771994 | 782.657164 | 271.8652687 | 318.862407  | 345.2331715 | Hoxc6         |
| ENSMUSG00000027035 | 0.372511862 | -1.42464173  | 6.76E-09 | 6.32E-08 | 466.236179 | 558.965974 | 470.836612 | 245.3418278 | 174.2731475 | 137.4997445 | Cers6         |
| ENSMUSG00000078502 | 2.005863351 | 1.004223326  | 6.81E-09 | 6.37E-08 | 140.767462 | 132.619344 | 136.654426 | 258.6035482 | 290.1360642 | 274.0102823 | Gm13212       |
| ENSMUSG00000030217 | 0.186953424 | -2.419249202 | 6.91E-09 | 6.46E-08 | 81.5913314 | 114.936764 | 127.958235 | 30.31250382 | 16.7826103  | 13.84889513 | Il18          |
| ENSMUSG00000037321 | 0.284948735 | -1.811225709 | 6.96E-09 | 6.50E-08 | 842.811555 | 2148.43337 | 1408.7829  | 392.1680182 | 389.7207199 | 471.8516413 | Tap1          |
| ENSMUSG00000032028 | 4.136744619 | 2.048495896  | 6.97E-09 | 6.50E-08 | 154.216582 | 129.672247 | 99.3850367 | 280.3906604 | 662.6209784 | 645.9520372 | Nxpe2         |
| ENSMUSG00000034394 | 0.22407176  | -2.15976726  | 7.00E-09 | 6.53E-08 | 97.732076  | 115.91913  | 162.742998 | 18.94531489 | 31.59897729 | 33.6303103  | Lif           |
| ENSMUSG00000034810 | 0.433052083 | -1.207387547 | 7.01E-09 | 6.53E-08 | 2729.27486 | 1681.80975 | 1957.88522 | 808.9649458 | 952.7570426 | 997.1204495 | Scn7a         |
| ENSMUSG00000003355 | 0.319381001 | -1.646649602 | 7.10E-09 | 6.62E-08 | 160.492389 | 149.319557 | 213.677829 | 47.36328722 | 67.98567842 | 51.34875335 | Fkbp11        |
| ENSMUSG00000021130 | 2.304382349 | 1.204380112  | 7.18E-09 | 6.69E-08 | 947.714695 | 819.292833 | 1362.81732 | 2262.070598 | 2305.767798 | 2638.214523 | Gdnt16        |
| ENSMUSG00000034919 | 4.291917182 | 2.101622238  | 7.28E-09 | 6.77E-08 | 18.8287688 | 17.6825791 | 18.6346944 | 75.78125956 | 68.94322318 | 91.99623195 | Ttc22         |
| ENSMUSG00000036957 | 2.194469141 | 1.133871983  | 7.56E-09 | 7.02E-08 | 109.386181 | 103.148378 | 130.442861 | 266.1816742 | 244.1739154 | 239.3880444 | Lfnk1         |
| ENSMUSG00000037664 | 0.430259147 | -1.216722232 | 7.58E-09 | 7.03E-08 | 771.97952  | 739.97165  | 1078.32765 | 410.1660674 | 389.7207199 | 311.6001405 | Cdkn1c        |
| ENSMUSG00000037379 | 0.130804133 | -2.934519974 | 7.82E-09 | 7.25E-08 | 102.213316 | 123.778054 | 320.516743 | 30.31250382 | 17.2358058  | 23.74096308 | Spon2         |
| ENSMUSG00000046561 | 0.182021876 | -2.45781625  | 7.89E-09 | 7.31E-08 | 123.731909 | 100.201282 | 89.4465331 | 9.472657445 | 21.06598486 | 26.70858347 | Arsj          |
| ENSMUSG00000037686 | 5.677696796 | 2.505305807  | 8.04E-09 | 7.45E-08 | 26.8982411 | 10.8060206 | 18.6346944 | 139.2480644 | 89.05166328 | 92.98543874 | Aspg          |
| ENSMUSG00000031264 | 0.317153572 | -1.656746502 | 8.20E-09 | 7.58E-08 | 171.252135 | 241.661915 | 245.977966 | 84.30665126 | 72.77340225 | 51.43875335 | Btk           |
| ENSMUSG00000023805 | 2.045707534 | 1.032599904  | 8.70E-09 | 8.03E-08 | 1042.75515 | 733.827034 | 749.114714 | 1832.959216 | 1568.458327 | 1769.690956 | Symj2         |
| ENSMUSG00000057135 | 0.041578599 | -4.588015055 | 8.74E-09 | 8.06E-08 | 33.7744974 | 112.972033 | 84.4772812 | 5.683594467 | 3.830179066 | 0           | Scimp         |
| ENSMUSG00000024177 | 0.22406312  | -2.158022887 | 8.91E-09 | 8.21E-08 | 70.8320349 | 79.5716061 | 90.688846  | 22.73437787 | 17.2358058  | 13.84889513 | Nme4          |
| ENSMUSG00000034266 | 0.133857623 | -2.901228794 | 8.96E-09 | 8.25E-08 | 45.7270099 | 105.113109 | 86.9619071 | 13.26172042 | 9.575447664 | 8.902861156 | Batf          |
| ENSMUSG00000027315 | 0.066658803 | -3.97060787  | 9.00E-09 | 8.28E-08 | 31.3812813 | 48.1359099 | 50.9348313 | 2.841797233 | 3.830179066 | 1.97841359  | Spm1nt        |
| ENSMUSG00000043557 | 2.579345197 | 1.367004863  | 9.03E-09 | 8.30E-08 | 164.975879 | 248.538473 | 146.592929 | 475.5274037 | 525.6920768 | 446.1322646 | Mdga1         |
| ENSMUSG00000041654 | 0.467704513 | -1.096330744 | 9.33E-09 | 8.56E-08 | 293.190828 | 269.168149 | 249.704905 | 123.1445468 | 115.8629167 | 141.4565717 | Sc39a11       |
| ENSMUSG00000021559 | 0.487377646 | -1.036888012 | 9.52E-09 | 8.73E-08 | 1271.3902  | 1150.35001 | 1642.33773 | 585.4102301 | 706.6680376 | 687.4987226 | Dapk1         |
| ENSMUSG00000022221 | 0.335155078 | -1.577099303 | 9.72E-09 | 8.90E-08 | 289.604396 | 219.067508 | 176.40844  | 81.46485402 | 83.30639468 | 65.28764848 | Ripk3         |
| ENSMUSG00000067276 | 0.116776071 | -3.098183413 | 9.74E-09 | 8.92E-08 | 851.777635 | 177.808157 | 243.49334  | 48.31055297 | 42.13196972 | 58.36320091 | Capn6         |
| ENSMUSG00000041062 | 6.977173078 | 2.802642622  | 9.89E-09 | 9.04E-08 | 8.06947233 | 5.89419305 | 8.69619071 | 47.36328722 | 58.41023075 | 51.43875335 | Msln1         |
| ENSMUSG00000005413 | 0.224316401 | -2.156392988 | 1.03E-08 | 9.40E-08 | 727.149118 | 1225.99215 | 1567.79895 | 238.7109676 | 397.3810781 | 153.3270532 | Hmxo1         |
| ENSMUSG00000017817 | 3.095520609 | 1.630182064  | 1.06E-08 | 9.69E-08 | 2507.81268 | 5769.43263 | 3058.57451 | 12016.06597 | 11396.69871 | 11678.57542 | Jph2          |
| ENSMUSG00000002870 | 0.474376173 | -1.075896547 | 1.09E-08 | 9.90E-08 | 274.362059 | 342.827928 | 320.516743 | 141.1425959 | 141.7166254 | 162.2299144 | Mcm2          |
| ENSMUSG00000015467 | 0.42054677  | -1.249661839 | 1.11E-08 | 1.01E-07 | 173.045351 | 199.420198 | 172.681501 | 83.35938551 | 73.73094702 | 72.21209604 | Egfl8         |
| ENSMUSG00000022283 | 2.496307708 | 1.319795779  | 1.13E-08 | 1.03E-07 | 9027.04972 | 10695.0133 | 12942.4164 | 25162.21997 | 35805.47145 | 20568.57689 | Paebp1        |
| ENSMUSG00000050370 | 0.236473726 | -2.080248195 | 1.14E-08 | 1.04E-07 | 91.4540198 | 91.3599922 | 152.804494 | 28.41797233 | 24.89616393 | 25.71937667 | Ch25h         |
| ENSMUSG00000071068 | 4.890542221 | 2.289994427  | 1.16E-08 | 1.05E-07 | 32.2778893 | 76.4245096 | 70.8118387 | 344.804731  | 350.4613845 | 180.0356367 | Tmem12        |
| ENSMUSG00000026051 | 0.291216836 | -1.779834331 | 1.17E-08 | 1.06E-07 | 605.210425 | 305.515673 | 341.636064 | 99.46290317 | 132.1411778 | 133.5429173 | 1500015010Rik |
| ENSMUSG00000045377 | 0.480255368 | -1.058126354 | 1.23E-08 | 1.12E-07 | 331.744974 | 430.276092 | 340.393751 | 172.4023655 | 173.3156027 | 183.9924639 | Tmem88        |
| ENSMUSG00000058934 | 0.086660912 | -3.528474771 | 1.24E-08 | 1.12E-07 | 61.8659546 | 106.095475 | 232.312523 | 9.472657445 | 19.15089533 | 5.935240771 | Igf1os        |
| ENSMUSG00000034664 | 3.843042669 | 1.942248995  | 1.25E-08 | 1.13E-07 | 186.494472 | 209.243853 | 268.339599 | 1161.347803 | 940.3089606 | 447.1214714 | Igta2b        |
| ENSMUSG00000043801 | 5.462663895 | 2.44960466   | 1.29E-08 | 1.16E-07 | 35.8643215 | 40.2769858 | 42.2386406 | 98.51563742 | 292.0511538 | 255.2153531 | Oaz1-ps       |
| ENSMUSG00000061232 | 0.403786633 | -1.308334943 | 1.32E-08 | 1.19E-07 | 13276.0752 | 25155.4336 | 17695.5058 | 6915.9872   | 7474.594447 | 8272.736428 | H2-K1         |
| ENSMUSG00000024261 | 0.09114752  | -3.455652789 | 1.36E-08 | 1.23E-07 | 62.7625626 | 43.2240823 | 85.7195942 | 1.894531489 | 6.702813365 | 8.902861156 | Syt4          |
| ENSMUSG00000044162 | 0.047517512 | -4.395396882 | 1.37E-08 | 1.23E-07 | 32.7778893 | 82.5187026 | 67.0848998 | 4.736328722 | 3.830179066 | 0           | Tnlp3         |
| ENSMUSG00000021596 | 4.887844948 | 2.289198521  | 1.40E-08 | 1.26E-07 | 201.736808 | 144.40773  | 106.838914 | 384.5898923 | 1172.992339 | 660.7901391 | Mtclp1        |
| ENSMUSG00000071454 | 2.477058743 | 1.308628082  | 1.42E-08 | 1.28E-07 | 148.836934 | 157.178481 | 125.473609 | 274.7070659 | 383.9754513 | 412.4992336 | Dtnb          |
| ENSMUSG00000034349 | 0.484831782 | -1.044443821 | 1.52E-08 | 1.37E-07 | 2393.94346 | 2877.34857 | 3740.60432 | 1407.636896 | 1547.392343 | 1412.587303 | Smc4          |
| ENSMUSG00000019850 | 0.43667955  | -1.195353124 | 1.52E-08 | 1.37E-07 | 471.615827 | 677.731559 | 472.078925 | 273.7598001 | 208.7447591 | 203.7765998 | Tnfaip3       |
| ENSMUSG00000037997 | 0.459970334 | -1.120387279 | 1.54E-08 | 1.38E-07 | 387.334672 | 532.442105 | 552.829267 | 233.0273731 | 232.6833782 | 210.7010474 | Parp11        |
| ENSMUSG00000022122 | 0.386641331 | -1.37093223  | 1.55E-08 | 1.39E-07 | 609.693465 | 457.782327 | 532.95226  | 253.8672195 | 216.4051172 | 148.3810193 | Ednrb         |
| ENSMUSG00000063268 | 0.472130611 | -1.08274207  | 1.59E-08 | 1.42E-07 | 627.625626 | 829.116488 | 931.734719 | 348.593794  | 372.4849141 | 405.574786  | Parp10        |
| ENSMUSG00000030268 | 0.211860761 | -2.238811685 | 1.62E-08 | 1.44E-07 | 131.801381 | 143.425364 | 299.397423 | 39.78516127 | 45.96214879 | 35.61144462 | Bcat1         |
| ENSMUSG00000041771 | 26.47174644 | 4.726381473  | 1.62E-08 | 1.45E-07 | 3.58643215 | 0.98236551 | 1.24231296 | 45.46875573 | 83.30639468 | 30.66541065 |               |

|                     |             |              |          |          |            |            |            |             |             |             |               |
|---------------------|-------------|--------------|----------|----------|------------|------------|------------|-------------|-------------|-------------|---------------|
| ENSMUSG00000027996  | 0.39033154  | -1.357228054 | 2.17E-08 | 1.91E-07 | 10441.8972 | 9369.80221 | 17207.2768 | 4116.816925 | 5307.67064  | 5024.181312 | Sfrp2         |
| ENSMUSG00000023232  | 0.071374992 | -3.808437503 | 2.21E-08 | 1.95E-07 | 82.4879394 | 298.639114 | 129.200548 | 10.41992319 | 22.98107439 | 2.967620385 | Serinc2       |
| ENSMUSG00000089617  | 134.2217731 | 7.06847491   | 2.23E-08 | 1.97E-07 | 0          | 0          | 1.24231296 | 48.31055297 | 45.96214879 | 54.40637373 | Scarna10      |
| ENSMUSG00000048138  | 0.077972139 | -3.680897478 | 2.24E-08 | 1.97E-07 | 30.4846733 | 51.0830064 | 54.6617702 | 3.789062978 | 4.787723832 | 1.97841359  | Smrt2         |
| ENSMUSG00000060429  | 4.10312569  | 2.036723349  | 2.25E-08 | 1.98E-07 | 156.906406 | 88.4128957 | 54.6617702 | 403.5352071 | 350.4613845 | 483.7221228 | Sntb1         |
| ENSMUSG00000000982  | 0.070141814 | -3.833581451 | 2.27E-08 | 1.99E-07 | 52.0032661 | 225.944067 | 104.354289 | 15.15625191 | 8.617902898 | 2.967620385 | Ccl3          |
| ENSMUSG00000035285  | 2.124957494 | 1.087433983  | 2.27E-08 | 1.99E-07 | 175.735175 | 188.614177 | 249.704905 | 435.7422425 | 403.1263467 | 460.9703665 | Nat14         |
| ENSMUSG00000024180  | 0.336274692 | -1.572287888 | 2.38E-08 | 2.08E-07 | 132.697989 | 145.390095 | 202.497012 | 55.88867892 | 49.79232786 | 55.39558053 | Tmem8         |
| ENSMUSG00000021200  | 2.925021664 | 1.54844731   | 2.40E-08 | 2.10E-07 | 540.654646 | 1080.60206 | 541.64845  | 1992.098981 | 2062.551427 | 2274.186422 | Asb2          |
| ENSMUSG00000097240  | 10.91040673 | 3.44763298   | 2.43E-08 | 2.12E-07 | 5.37964822 | 5.89419305 | 1.24231296 | 51.1523502  | 38.30179066 | 52.42796014 | Gm26614       |
| ENSMUSG00000034488  | 0.137435966 | -2.863168494 | 2.44E-08 | 2.13E-07 | 242.980778 | 70.7303165 | 218.647081 | 21.78711212 | 33.51406683 | 17.80572231 | Edi3          |
| ENSMUSG00000059049  | 0.059941712 | -4.060295902 | 2.44E-08 | 2.13E-07 | 83.3845474 | 38.3122548 | 38.5117017 | 1.894531489 | 5.745268599 | 1.97841359  | Frem1         |
| ENSMUSG00000026494  | 0.491861278 | -1.023676612 | 2.45E-08 | 2.14E-07 | 850.881027 | 616.925539 | 791.353355 | 325.8594161 | 388.7631752 | 396.6719248 | Kif26b        |
| ENSMUSG00000042744  | 2.233630067 | 1.159215864  | 2.49E-08 | 2.17E-07 | 1085.79233 | 713.197358 | 658.425868 | 1859.482656 | 1824.12278  | 1810.248435 | Hectd4        |
| ENSMUSG00000045917  | 0.441620002 | -1.17912258  | 2.50E-08 | 2.18E-07 | 245.670602 | 274.079977 | 283.247355 | 123.1445468 | 135.0138121 | 95.95305913 | Tmem268       |
| ENSMUSG000000051367 | 0.462820911 | -1.111474047 | 2.55E-08 | 2.23E-07 | 552.310551 | 668.008545 | 664.637433 | 231.1328416 | 295.8813328 | 345.2331715 | Six1          |
| ENSMUSG00000067203  | 0.388276295 | -1.364844464 | 2.63E-08 | 2.29E-07 | 183.804648 | 266.221053 | 197.527761 | 89.04297998 | 84.26393948 | 78.14733682 | H2-K2         |
| ENSMUSG00000024598  | 0.015710576 | -5.992120101 | 2.66E-08 | 2.31E-07 | 291.397612 | 211.208584 | 1078.32765 | 12.31445468 | 11.4905372  | 0.989206795 | Fbn2          |
| ENSMUSG00000070691  | 0.169058083 | -2.564409102 | 2.66E-08 | 2.31E-07 | 135.387814 | 204.332026 | 244.735653 | 55.88867892 | 25.8537069  | 16.81651552 | Runx3         |
| ENSMUSG00000033491  | 0.177112255 | -2.497264055 | 2.68E-08 | 2.33E-07 | 172.148743 | 80.5539716 | 116.777418 | 30.31250382 | 13.40562783 | 21.76254949 | Prss35        |
| ENSMUSG00000019866  | 0.347942425 | -1.523079495 | 2.71E-08 | 2.35E-07 | 218.772361 | 361.510507 | 236.039462 | 97.56837168 | 103.4148348 | 83.09337079 | Crybg1        |
| ENSMUSG00000033213  | 0.066959164 | -3.900574682 | 2.71E-08 | 2.35E-07 | 34.0711054 | 196.473102 | 156.531433 | 13.26172042 | 8.617902898 | 3.956827181 | AA467197      |
| ENSMUSG00000039701  | 2.355038874 | 1.235750874  | 2.77E-08 | 2.40E-07 | 523.619094 | 372.316527 | 295.670484 | 912.2169119 | 931.6910577 | 968.4334524 | Usp53         |
| ENSMUSG00000041556  | 4.464750196 | 2.158579458  | 2.77E-08 | 2.40E-07 | 34.9677134 | 14.7354826 | 34.7847629 | 143.9843932 | 107.2450138 | 124.6400562 | Fbxo2         |
| ENSMUSG00000040594  | 2.664098424 | 1.413647383  | 2.80E-08 | 2.43E-07 | 86.0743716 | 67.78322   | 58.3887091 | 187.5586174 | 167.5703341 | 213.6686677 | Ranbp17       |
| ENSMUSG00000057143  | 0.401317303 | -1.371718437 | 2.83E-08 | 2.44E-07 | 105.20427  | 1628.76201 | 1918.13121 | 614.7754682 | 689.4322318 | 542.0853237 | Trim12c       |
| ENSMUSG00000027947  | 0.474563063 | -1.07532828  | 2.85E-08 | 2.46E-07 | 885.848741 | 1075.69023 | 1375.24045 | 545.6250688 | 547.7156064 | 488.6681568 | Il6ra         |
| ENSMUSG00000051920  | 0.160760034 | -2.637019311 | 2.86E-08 | 2.47E-07 | 75.3150751 | 96.7771994 | 59.631022  | 5.683594467 | 14.3631715  | 10.88127475 | Rspo2         |
| ENSMUSG00000034575  | 2.025640384 | 1.018378072  | 2.90E-08 | 2.50E-07 | 64.1074746 | 608.084249 | 650.971991 | 990.8399687 | 1372.16165  | 1485.788606 | Padp7         |
| ENSMUSG0000002378   | 0.400442872 | -1.320331657 | 2.91E-08 | 2.51E-07 | 755.840575 | 1339.94655 | 1236.10139 | 457.5293546 | 396.4235333 | 479.7652956 | Fam49b        |
| ENSMUSG00000038811  | 0.432431357 | -1.209456953 | 2.96E-08 | 2.55E-07 | 420.509169 | 664.079083 | 628.610357 | 250.0781565 | 256.6219974 | 233.4528037 | Gngt2         |
| ENSMUSG00000037306  | 0.475260818 | -1.07320863  | 2.98E-08 | 2.57E-07 | 1256.14786 | 962.718197 | 882.042201 | 482.1582639 | 430.8951449 | 561.8694596 | Man1c1        |
| ENSMUSG00000074412  | 19.43642462 | 4.280690951  | 2.99E-08 | 2.57E-07 | 0.89660804 | 2.94709652 | 3.72693888 | 36.94336403 | 34.47161159 | 70.23368245 | Gm10689       |
| ENSMUSG00000042225  | 0.407740656 | -1.294276278 | 3.00E-08 | 2.58E-07 | 378.368592 | 460.729423 | 539.163824 | 152.5097849 | 230.7682887 | 178.0572231 | Ammecr1       |
| ENSMUSG00000041961  | 2.119125459 | 1.038469003  | 3.01E-08 | 2.58E-07 | 164.079271 | 121.813323 | 137.896738 | 318.2812901 | 282.4757061 | 298.7404521 | Znf3          |
| ENSMUSG00000026822  | 0.325288971 | -1.620206186 | 3.02E-08 | 2.59E-07 | 324.572109 | 558.965974 | 309.335927 | 122.197281  | 152.2496179 | 113.7587814 | Lcn2          |
| ENSMUSG000000101249 | 3.252892029 | 1.701722937  | 3.03E-08 | 2.60E-07 | 57.3829144 | 91.3599922 | 105.596602 | 292.705115  | 323.6501311 | 206.7442202 | Gm29216       |
| ENSMUSG00000026938  | 0.291172751 | -1.880052744 | 3.04E-08 | 2.60E-07 | 104.006532 | 138.513537 | 135.412113 | 45.46875573 | 26.81125346 | 37.58985821 | Fcna          |
| ENSMUSG00000049588  | 2.395406057 | 1.260270235  | 3.06E-08 | 2.62E-07 | 148.836934 | 129.672247 | 118.019731 | 389.326221  | 274.815348  | 287.8591774 | Ccdc69        |
| ENSMUSG00000061751  | 2.196025815 | 1.134895014  | 3.14E-08 | 2.69E-07 | 901.091077 | 733.827034 | 535.436885 | 1491.943548 | 1573.246051 | 1707.370928 | Kalrn         |
| ENSMUSG00000038879  | 2.716740131 | -1.441876572 | 3.17E-08 | 2.71E-07 | 112.972613 | 91.3599922 | 62.115648  | 252.9199538 | 231.7258335 | 244.3340784 | Nipal2        |
| ENSMUSG00000020390  | 3.288887449 | 1.717599638  | 3.25E-08 | 2.78E-07 | 2221.79472 | 3477.5739  | 2884.65069 | 5323.633484 | 13155.70755 | 9751.600586 | Ube2b         |
| ENSMUSG00000046718  | 0.265830306 | -1.911422507 | 3.36E-08 | 2.86E-07 | 1239.11231 | 311.15156  | 3565.43819 | 580.6739014 | 753.5877312 | 769.6028866 | Bst2          |
| ENSMUSG00000032436  | 0.246631958 | -1.235715141 | 3.37E-08 | 2.87E-07 | 431.284466 | 567.718373 | 714.329952 | 248.183625  | 254.7069739 | 223.5607357 | Cmtm7         |
| ENSMUSG00000039621  | 0.359612553 | -1.475484712 | 3.39E-08 | 2.89E-07 | 687.698364 | 904.758632 | 719.299203 | 390.2734867 | 217.362662  | 223.5607357 | Prex1         |
| ENSMUSG00000043463  | 9.591514033 | 3.261758564  | 3.51E-08 | 2.99E-07 | 5.37964822 | 5.89419305 | 2.48462592 | 41.6796276  | 39.25933542 | 54.40637373 | Rab9b         |
| ENSMUSG00000090698  | 0.487729799 | -1.035845975 | 3.70E-08 | 3.15E-07 | 901.091077 | 659.167256 | 894.465331 | 348.593794  | 421.402947  | 481.402947  | Apold1        |
| ENSMUSG00000028033  | 3.058550276 | 1.612847991  | 3.79E-08 | 3.22E-07 | 34.0711054 | 55.9948339 | 57.1463961 | 146.8261904 | 160.8675208 | 139.4781581 | Kcnq5         |
| ENSMUSG00000039770  | 2.490178073 | 1.316248914  | 3.85E-08 | 3.27E-07 | 981.785801 | 1299.66957 | 1460.96004 | 2657.080413 | 4128.933033 | 2529.401775 | Ypel5         |
| ENSMUSG00000022439  | 0.271459264 | -1.881192373 | 3.93E-08 | 3.33E-07 | 119.248869 | 227.908798 | 182.620005 | 55.88867892 | 37.34424589 | 50.44954655 | Parvg         |
| ENSMUSG00000031851  | 0.482166209 | -1.052397548 | 3.96E-08 | 3.36E-07 | 342.50427  | 415.54061  | 392.570895 | 210.2929953 | 187.6787742 | 156.2946736 | Ntpcr         |
| ENSMUSG00000026944  | 2.390206498 | 1.257135263  | 4.13E-08 | 3.50E-07 | 873.296228 | 727.932841 | 468.351986 | 1755.283424 | 1588.566768 | 1609.439456 | Abca2         |
| ENSMUSG00000053137  | 0.36983951  | -1.435028739 | 4.16E-08 | 3.52E-07 | 217.875753 | 323.198252 | 378.905435 | 105.1464976 | 119.6930958 | 114.7479882 | Mapk11        |
| ENSMUSG00000075122  | 0.202676625 | -2.302748382 | 4.17E-08 | 3.52E-07 | 54.6930903 | 81.5363371 | 93.1734719 | 12.31445468 | 17.2358058  | 16.81651552 | Cd80          |
| ENSMUSG00000018500  | 0.209403394 | -2.25564327  | 4.20E-08 | 3.55E-07 | 77.1082912 | 90.3776267 | 114.292792 | 12.31445468 | 27.76879823 | 18.79492911 | Adora2b       |
| ENSMUSG00000042680  | 3.44965079  | 1.786450325  | 4.26E-08 | 3.60E-07 | 115.662437 | 102.166013 | 48.4502054 | 321.1230874 | 266.1974451 | 337.3195171 | Garem1        |
| ENSMUSG00000076612  | 0.022537105 | -5.471553972 | 4.27E-08 | 3.60E-07 | 187.39108  | 115.33237  | 154.016807 | 9.472657445 | 17.2358058  | 6.924447566 | Ighg2c        |
| ENSMUSG00000021062  | 0.112433649 | -3.152854226 | 4.41E-08 | 3.72E-07 | 74.4184671 | 70.7303165 | 154.046807 | 17.0507834  | 12.44808196 | 3.956827181 | Rab15         |
| ENSMUSG00000029283  | 0.335772139 | -1.574445567 | 4.44E-08 | 3.74E-07 | 135.387814 | 127.707516 | 103.111976 | 47.36328722 | 40.21688019 | 35.61144462 | Cdc7          |
| ENSMUSG0000003418   | 0.310555838 | -1.687075405 | 4.46E-08 | 3.75E-07 | 344.297486 | 273.097611 | 273.097611 | 121.2500153 | 69.90076795 | 70.23368245 | St8sia6       |
| ENSMUSG00000009687  | 0.481113538 | -1.0555507   | 4.46E-08 | 3.76E-07 | 1838.94308 | 2729.99375 | 2774.08484 | 1231.445468 | 1246.723286 | 1053.505237 | Fxyd5         |
| ENSMUSG000000109635 | 3.522783236 | 1.816715706  | 4.63E-08 | 3.89E-07 | 55.8643215 | 37.3298893 | 19.8770073 | 115.5664208 | 102.45279   | 113.7587814 | Gm45670       |
| ENSMUSG00000021693  | 2.370173076 | 1.244992412  | 4.71E-08 | 3.95E-07 | 356.793591 | 575.666187 | 636.064235 | 967.1583251 | 1726.453214 | 1496.669881 | Kif24         |
| ENSMUSG00000052566  | 0.453473231 | -1.140910706 | 4.72E-08 | 3.96E-07 | 199.943592 | 213.173315 | 237.281775 | 87.14844849 | 98.62711094 | 108.8127475 | Hook2         |
| ENSMUSG00000086918  | 2.4525125   | 1.294260489  | 4.72E-08 | 3.96E-07 | 77.1082912 | 119.848592 | 96.9004108 | 244.3945621 | 254.7069079 | 220.5931153 | 4930429F24Rik |
| ENSMUSG0000004359   | 0.066049967 | -3.920298343 | 4.76E-08 | 3.99E-07 | 30.4846733 | 45.1888133 | 40.9963277 | 3.789062978 | 2.872634299 | 0.989206795 | Spic          |
| ENSMUSG00000002266  | 0.194657314 | -2.360991538 | 4.76E-08 | 3.99E-07 | 214.289321 | 126.72515  | 131.685174 | 35.99609829 | 41.17442496 | 14.83810193 | Zim1          |
| ENSMUSG00000036377  | 3.060273568 | 1.613660626  | 4.80E-08 | 4.02E-0  |            |            |            |             |             |             |               |

|                    |             |              |          |          |            |            |            |             |             |             |                |
|--------------------|-------------|--------------|----------|----------|------------|------------|------------|-------------|-------------|-------------|----------------|
| ENSMUSG00000042029 | 0.485762182 | -1.041677919 | 5.88E-08 | 4.86E-07 | 312.916205 | 303.550942 | 278.278103 | 125.0390783 | 166.6127894 | 143.4349853 | Ncapg2         |
| ENSMUSG00000022100 | 2.356208628 | 1.236467287  | 5.93E-08 | 4.89E-07 | 850.881027 | 858.587454 | 879.557575 | 1403.847833 | 2620.800026 | 2075.355856 | Xpo7           |
| ENSMUSG00000035697 | 0.370116887 | -1.433947133 | 5.95E-08 | 4.91E-07 | 1084.89572 | 1502.03686 | 1252.25146 | 668.7696156 | 385.8905409 | 366.0065142 | Arhgap45       |
| ENSMUSG00000040329 | 0.296809423 | -1.752391198 | 5.97E-08 | 4.93E-07 | 144.353894 | 165.037405 | 99.3850367 | 33.15430106 | 44.51405926 | 44.51405926 | Il7            |
| ENSMUSG00000020737 | 0.431432861 | -1.212792027 | 6.00E-08 | 4.94E-07 | 1085.79233 | 1695.56287 | 1890.80032 | 671.6114128 | 726.7764777 | 616.2758334 | Hn1            |
| ENSMUSG00000001156 | 2.057109126 | 1.040618328  | 6.18E-08 | 5.08E-07 | 394.507536 | 500.024043 | 474.56355  | 969.0528566 | 1090.643489 | 754.7647847 | Mxd1           |
| ENSMUSG00000045348 | 3.087727515 | 1.626545444  | 6.29E-08 | 5.17E-07 | 50.2100501 | 34.3827928 | 53.4194572 | 167.6660368 | 123.5232749 | 133.5429173 | Nyap1          |
| ENSMUSG00000085565 | 66.83797508 | 6.062596121  | 6.47E-08 | 5.31E-07 | 0.89660804 | 0          | 1.24231296 | 49.25781871 | 40.21688019 | 47.48192617 | Gm15721        |
| ENSMUSG00000049511 | 2.302296278 | 1.203073503  | 6.75E-08 | 5.54E-07 | 675.145852 | 525.565547 | 542.890763 | 980.4200455 | 1398.972904 | 1637.137246 | Htr1b          |
| ENSMUSG00000064262 | 0.455790627 | -1.133556839 | 6.78E-08 | 5.55E-07 | 599.830777 | 547.177588 | 472.078925 | 305.0195697 | 204.91458   | 228.5067697 | Gimap8         |
| ENSMUSG00000024665 | 2.706206039 | 1.436271684  | 6.87E-08 | 5.63E-07 | 353.263567 | 194.50837  | 206.223951 | 769.1797845 | 586.9749418 | 688.4879294 | Fads2          |
| ENSMUSG00000053559 | 0.393365397 | -1.346058041 | 7.03E-08 | 5.75E-07 | 251.946858 | 349.722121 | 413.690215 | 114.6191551 | 142.6741702 | 141.4565717 | Smagp          |
| ENSMUSG00000040809 | 0.177364737 | -2.495208889 | 7.10E-08 | 5.80E-07 | 104.006532 | 248.538473 | 137.896738 | 16.10351766 | 38.30179066 | 32.64382424 | Chl3           |
| ENSMUSG00000099974 | 0.112153082 | -3.156458832 | 7.16E-08 | 5.84E-07 | 43.0371858 | 104.130744 | 58.3887091 | 10.41992319 | 8.617902898 | 3.956827181 | Bcl2a1d        |
| ENSMUSG00000039936 | 0.343695153 | -1.54079859  | 7.24E-08 | 5.91E-07 | 589.07148  | 877.252398 | 814.957301 | 370.3809061 | 216.4051172 | 196.8521522 | Pik3cd         |
| ENSMUSG00000001864 | 0.323266496 | -1.629204103 | 7.28E-08 | 5.94E-07 | 158.699623 | 205.314391 | 253.431844 | 49.25781871 | 68.94322318 | 81.1149572  | Aif1           |
| ENSMUSG00000053175 | 0.30256294  | -1.724692807 | 7.31E-08 | 5.96E-07 | 287.81118  | 438.135016 | 555.313893 | 169.5065683 | 123.5232749 | 93.9746454  | Bcl3           |
| ENSMUSG00000108929 | 28.1943315  | 4.817333231  | 7.40E-08 | 6.03E-07 | 4.48304019 | 0.98236551 | 0          | 29.36523808 | 87.13657375 | 49.46033976 | Cc2d2b         |
| ENSMUSG00000003206 | 0.151034254 | -2.727052306 | 7.44E-08 | 6.05E-07 | 53.7964822 | 70.7303165 | 105.596602 | 10.41992319 | 17.2358058  | 6.924447566 | Ebi3           |
| ENSMUSG00000031438 | 0.112944982 | -3.146207916 | 7.52E-08 | 6.12E-07 | 124.628517 | 549.142319 | 309.335927 | 54.94141318 | 47.13196972 | 13.84889513 | Rnf128         |
| ENSMUSG00000089661 | 27.99833652 | 4.807269209  | 7.53E-08 | 6.12E-07 | 0          | 1.96473102 | 2.48462592 | 47.36328722 | 36.38670112 | 32.64382424 | Mia            |
| ENSMUSG00000028167 | 0.455917263 | -1.133156058 | 7.71E-08 | 6.26E-07 | 234.014698 | 199.420198 | 234.797149 | 115.5664208 | 91.92429758 | 96.94226592 | Bdh2           |
| ENSMUSG00000030677 | 0.234646026 | -2.037141401 | 7.91E-08 | 6.41E-07 | 132.697989 | 191.561274 | 132.927487 | 55.88867892 | 28.72634299 | 26.70858347 | Kif22          |
| ENSMUSG00000022769 | 0.333589192 | -1.583855549 | 8.26E-08 | 6.69E-07 | 229.531657 | 356.598679 | 387.601643 | 139.2480644 | 87.13657375 | 97.93147272 | Sdf2l1         |
| ENSMUSG00000026981 | 0.11373201  | -3.13628974  | 8.50E-08 | 6.87E-07 | 137.18103  | 753.473444 | 340.393751 | 52.09961595 | 66.07058888 | 21.76254949 | Il1rn          |
| ENSMUSG00000039167 | 0.471239972 | -1.085300865 | 8.51E-08 | 6.87E-07 | 1562.78781 | 1060.95475 | 1006.2735  | 569.3067124 | 505.0529441 | 545.0529441 | Adgr4          |
| ENSMUSG00000025825 | 2.096282236 | 1.067832969  | 8.60E-08 | 6.94E-07 | 1295.59861 | 1743.69878 | 1632.39923 | 2645.713224 | 4023.603109 | 3121.936645 | Iscu           |
| ENSMUSG00000096917 | 6.340756242 | 2.664654916  | 8.62E-08 | 6.96E-07 | 29.5880652 | 24.5591377 | 9.93850367 | 74.83399381 | 161.8250655 | 175.0896027 | 2500002B13Rik  |
| ENSMUSG00000010303 | 0.131901344 | -3.922468834 | 8.86E-08 | 7.14E-07 | 48.1162194 | 44.7232665 | 44.7232665 | 5.683594467 | 66.0358132  | 10.88127475 | 2600014E21Rik  |
| ENSMUSG00000012705 | 0.39675552  | -1.3336778   | 8.97E-08 | 7.22E-07 | 2221.79472 | 1392.01192 | 2739.30008 | 778.6524419 | 947.9693188 | 793.3438497 | Retn           |
| ENSMUSG00000060743 | 2.377884765 | 1.249678802  | 9.07E-08 | 7.30E-07 | 3557.74069 | 3114.09866 | 2292.06741 | 5351.10419  | 8916.656865 | 7052.055242 | H3f3a          |
| ENSMUSG00000027857 | 3.339905244 | 1.739807173  | 9.22E-08 | 7.41E-07 | 26.8982411 | 26.5238687 | 28.5731981 | 97.56837168 | 100.5422005 | 75.17971643 | Tshb           |
| ENSMUSG00000019699 | 2.122465366 | 1.085741012  | 9.42E-08 | 7.57E-07 | 1691.00276 | 1233.85108 | 1010.00044 | 2993.359753 | 2763.474196 | 2600.624664 | Akt3           |
| ENSMUSG00000030047 | 0.360944123 | -1.47015258  | 9.64E-08 | 7.74E-07 | 225.945225 | 339.89466  | 300.639736 | 133.56447   | 96.71202141 | 82.104164   | Arhgap25       |
| ENSMUSG00000009731 | 0.391542415 | -1.352759494 | 9.66E-08 | 7.75E-07 | 151.526758 | 150.301923 | 197.527761 | 56.83594467 | 62.81283365 | 71.22288925 | Kcnd1          |
| ENSMUSG00000044349 | 0.309556172 | -1.691726871 | 9.87E-08 | 7.91E-07 | 126.421733 | 138.513537 | 163.985311 | 31.25976957 | 43.08951449 | 58.36320091 | Snhg11         |
| ENSMUSG00000061577 | 0.135992714 | -2.878398731 | 1.02E-07 | 8.13E-07 | 39.4507536 | 82.5187026 | 69.5695527 | 12.31445468 | 5.745268599 | 7.913654361 | Adgrg5         |
| ENSMUSG00000028551 | 0.495513053 | -1.013005032 | 1.02E-07 | 8.18E-07 | 986.268841 | 784.910041 | 805.018798 | 356.1791199 | 508.456271  | 412.4992336 | Cdkn2c         |
| ENSMUSG00000057457 | 2.656614957 | 1.409589142  | 1.05E-07 | 8.40E-07 | 89.6608037 | 79.5716061 | 52.1771443 | 214.0820582 | 190.5514085 | 187.9492911 | Phex           |
| ENSMUSG00000053117 | 0.113675089 | -3.137011957 | 1.06E-07 | 8.49E-07 | 38.5541456 | 33.4004273 | 47.2078925 | 3.789062978 | 4.787723832 | 4.946033976 | E330013P04Rik  |
| ENSMUSG00000020437 | 0.231018603 | -2.113919065 | 1.07E-07 | 8.57E-07 | 406.163441 | 706.3208   | 441.021101 | 197.0312748 | 73.73094702 | 88.03940477 | Myo1g          |
| ENSMUSG00000052516 | 0.077552698 | -3.688679225 | 1.08E-07 | 8.64E-07 | 63.6591706 | 90.3776267 | 31.057824  | 8.5253917   | 3.830179066 | 1.97841359  | Robo2          |
| ENSMUSG00000028132 | 6.126411776 | 2.615042338  | 1.12E-07 | 8.91E-07 | 46.6236179 | 157.178481 | 40.9963277 | 341.9629338 | 520.9043529 | 640.0167964 | Tmem56         |
| ENSMUSG00000069892 | 0.391471885 | -1.353019395 | 1.13E-07 | 8.97E-07 | 471.615827 | 452.870499 | 344.12069  | 217.8711212 | 146.5043493 | 132.5537105 | 9930011J21Rik2 |
| ENSMUSG00000002699 | 0.287796026 | -1.796881426 | 1.13E-07 | 8.99E-07 | 296.77726  | 453.852864 | 419.90178  | 143.9843932 | 130.2260882 | 62.32002809 | Lcp2           |
| ENSMUSG00000085146 | 2.06633597  | 6.626082678  | 1.14E-07 | 9.05E-07 | 0          | 0          | 1.24231296 | 38.83789552 | 35.42915636 | 51.43875335 | Eif2c5         |
| ENSMUSG00000047712 | 11.06214324 | 1.004475737  | 1.15E-07 | 9.12E-07 | 444.717586 | 301.586211 | 352.81688  | 790.0196309 | 669.3237917 | 747.8403371 | Ubr1           |
| ENSMUSG00000054520 | 0.463562017 | -1.109165734 | 1.16E-07 | 9.19E-07 | 346.090702 | 482.341464 | 441.021101 | 221.6601842 | 168.5278789 | 197.841359  | Sh3bp2         |
| ENSMUSG00000019817 | 0.373381807 | -1.421276461 | 1.17E-07 | 9.32E-07 | 1006.89083 | 505.918236 | 798.807233 | 249.1308908 | 302.5841462 | 311.6001405 | Plagl1         |
| ENSMUSG00000021506 | 0.16009857  | -2.642967672 | 1.17E-07 | 9.32E-07 | 121.042085 | 127.707516 | 267.097286 | 41.67969276 | 27.76879823 | 12.85968834 | Pitx1          |
| ENSMUSG00000037661 | 0.404623447 | -1.305348171 | 1.19E-07 | 9.42E-07 | 141.66407  | 146.372461 | 162.742998 | 57.78321041 | 70.85831272 | 53.41716694 | Gpr160         |
| ENSMUSG00000042659 | 0.482982854 | -1.049956122 | 1.20E-07 | 9.52E-07 | 574.725752 | 711.232627 | 887.011453 | 366.5918431 | 328.4378549 | 353.1468259 | Arrdc4         |
| ENSMUSG00000041193 | 9.905953455 | 3.308295842  | 1.20E-07 | 9.52E-07 | 2.68982411 | 8.84128957 | 2.48462592 | 52.09961595 | 44.04705926 | 44.51430578 | Pla2g5         |
| ENSMUSG00000039328 | 0.43033267  | -1.216475725 | 1.21E-07 | 9.55E-07 | 202.633416 | 202.367295 | 247.220279 | 109.8828264 | 90.00920805 | 80.12575041 | Rnf122         |
| ENSMUSG00000030484 | 0.22664365  | -2.141502357 | 1.23E-07 | 9.71E-07 | 173.045351 | 335.969004 | 295.670484 | 93.7793087  | 50.74987262 | 37.58985821 | Cyp4f18        |
| ENSMUSG00000078974 | 3.541238376 | 1.824253961  | 1.23E-07 | 9.73E-07 | 749.564319 | 1003.97755 | 1193.86275 | 1693.711151 | 4363.531501 | 4377.240068 | Sec61g         |
| ENSMUSG00000056966 | 0.223356164 | -2.162582027 | 1.28E-07 | 1.01E-06 | 66.3489947 | 58.9419305 | 55.9040832 | 14.20898617 | 10.53299243 | 15.82730872 | Gjc3           |
| ENSMUSG00000096727 | 0.301477499 | -1.729877763 | 1.28E-07 | 1.01E-06 | 404.370225 | 947.982715 | 724.268455 | 163.8769738 | 204.91458   | 257.1937667 | Psmb9          |
| ENSMUSG00000029371 | 0.153394342 | -2.704682821 | 1.29E-07 | 1.02E-06 | 132.697989 | 217.102777 | 283.247355 | 23.68164361 | 58.41023075 | 14.83810193 | Cxcl5          |
| ENSMUSG00000023982 | 0.213244877 | -2.229417013 | 1.31E-07 | 1.03E-06 | 60.9693465 | 74.6597786 | 72.0541516 | 16.10351766 | 19.15089533 | 8.902861156 | Gucal1a        |
| ENSMUSG00000004933 | 0.24364206  | -2.037164888 | 1.31E-07 | 1.03E-06 | 95.0404519 | 178.790522 | 134.1698   | 40.73242701 | 22.02352963 | 36.60065142 | Matk           |
| ENSMUSG00000028037 | 0.154332349 | -2.695887602 | 1.34E-07 | 1.06E-06 | 212.496105 | 612.996077 | 380.147766 | 29.36523808 | 108.2025586 | 48.47113296 | Ifi44          |
| ENSMUSG00000031351 | 0.275491844 | -1.859918486 | 1.35E-07 | 1.06E-06 | 234.014698 | 118.866226 | 229.827897 | 42.6269585  | 54.58005169 | 63.30923489 | Zfp185         |
| ENSMUSG00000067149 | 0.049776891 | -4.328380054 | 1.44E-07 | 1.13E-06 | 1007.78743 | 2395.00711 | 2048.57407 | 57.78321041 | 183.8485952 | 29.67620385 | Jchain         |
| ENSMUSG00000028370 | 0.34507048  | -1.535037035 | 1.44E-07 | 1.13E-06 | 128.214949 | 94.3070887 | 106.838914 | 36.94336403 | 39.25933542 | 37.58985821 | Pappa          |
| ENSMUSG00000020354 | 3.022071553 | 1.59553782   | 1.45E-07 | 1.13E-06 | 372.092335 | 189.596543 | 187.589257 | 917.9005064 | 661.6634336 | 689.4771362 | Sgcd           |
| ENSMUSG00000040283 | 0.464493855 | -1.106268583 | 1.45E-07 | 1.13E-06 | 478.788692 | 340.880831 | 421.144093 | 174.296897  | 223.1079306 | 179.0464299 | Btnl9          |
| ENSMUSG00000076031 | 21.73526339 | 4.441965673  | 1.46E-07 | 1.14E-06 | 0          | 1          |            |             |             |             |                |

|                     |              |              |          |          |            |            |            |             |             |             |               |
|---------------------|--------------|--------------|----------|----------|------------|------------|------------|-------------|-------------|-------------|---------------|
| ENSMUSG00000058290  | 0.4277785169 | -1.22504163  | 1.64E-07 | 1.27E-06 | 162.286055 | 138.513537 | 142.86599  | 65.36133637 | 59.36777552 | 65.28764848 | Esp1l         |
| ENSMUSG00000026418  | 0.055664018  | -4.167111131 | 1.66E-07 | 1.28E-06 | 31.3812813 | 85.4657992 | 195.043135 | 2.841797233 | 11.4905372  | 2.967620385 | Tnni1         |
| ENSMUSG00000070111  | 160.5959715  | 7.327291894  | 1.67E-07 | 1.29E-06 | 0          | 0          | 0          | 17.0507834  | 25.85370869 | 48.47113296 | Gm10286       |
| ENSMUSG00000060678  | 31.43711825  | 4.974397071  | 1.67E-07 | 1.29E-06 | 0          | 0.98236551 | 3.72693888 | 24.62890936 | 55.53759645 | 53.41716964 | Hist1h4c      |
| ENSMUSG00000001228  | 0.297464009  | -1.74921297  | 1.72E-07 | 1.33E-06 | 131.801381 | 277.027073 | 203.739325 | 60.62500765 | 67.02813365 | 54.40637373 | Uhrf1         |
| ENSMUSG00000030780  | 2.235489068  | 1.160590491  | 1.72E-07 | 1.33E-06 | 489.547988 | 389.016741 | 285.731981 | 781.4942392 | 963.290035  | 863.5775321 | BC017158      |
| ENSMUSG00000009875  | 141.9122458  | 7.148855276  | 1.72E-07 | 1.33E-06 | 0          | 0          | 1.24231296 | 18.94531489 | 66.07058888 | 72.21209604 | Gm21777       |
| ENSMUSG00000004707  | 0.147567266  | -2.76055536  | 1.73E-07 | 1.33E-06 | 223.255401 | 385.087279 | 350.332254 | 91.88477721 | 31.59897729 | 17.80572231 | Ly9           |
| ENSMUSG00000022357  | 3.06479261   | 1.615789452  | 1.74E-07 | 1.34E-06 | 45.7270099 | 48.1359099 | 28.5731981 | 143.9843932 | 116.8204615 | 117.7156086 | Klhl38        |
| ENSMUSG00000028874  | 0.267213917  | -1.903932946 | 1.76E-07 | 1.35E-06 | 212.496105 | 404.734589 | 324.243682 | 120.3027495 | 76.60358132 | 54.40637373 | Fgr           |
| ENSMUSG00000029299  | 0.401563555  | -1.316299754 | 1.78E-07 | 1.37E-06 | 121.042085 | 123.778054 | 135.412113 | 45.46875573 | 52.66496215 | 54.40637373 | Abcg3         |
| ENSMUSG00000043903  | 0.3088087    | -1.695214696 | 1.78E-07 | 1.37E-06 | 255.533291 | 186.649446 | 402.509399 | 79.57032253 | 97.66956618 | 83.09337079 | Zfp469        |
| ENSMUSG00000044220  | 61.97115745  | 5.953525009  | 1.80E-07 | 1.38E-06 | 0          | 1.96473102 | 0          | 40.73242701 | 46.91969356 | 38.57906501 | Nkx2-3        |
| ENSMUSG00000021265  | 2.212881604  | 1.145926265  | 1.81E-07 | 1.39E-06 | 80.6947233 | 90.3776267 | 79.5080294 | 181.8750229 | 205.8721248 | 167.1759484 | Slc25a29      |
| ENSMUSG00000029095  | 0.369737841  | -1.435425391 | 1.82E-07 | 1.40E-06 | 261.809547 | 461.711789 | 293.185858 | 116.5136866 | 139.8015359 | 119.6940222 | Abilmt2       |
| ENSMUSG00000006273  | 0.47304216   | -1.079959324 | 1.84E-07 | 1.41E-06 | 1585.20301 | 2512.89097 | 2622.52266 | 1052.412242 | 1082.025586 | 1043.613169 | Atp6v1b2      |
| ENSMUSG00000022253  | 2.63233203   | 1.396341475  | 1.86E-07 | 1.43E-06 | 345.194094 | 389.016741 | 259.643408 | 593.9356218 | 1095.431213 | 929.8543874 | Nadk2         |
| ENSMUSG00000030222  | 0.376398256  | -1.40966815  | 1.88E-07 | 1.44E-06 | 201.736808 | 181.737619 | 165.227624 | 77.67579105 | 79.47621561 | 49.46033976 | Rerg          |
| ENSMUSG00000024205  | 8.586599213  | 3.102086854  | 1.88E-07 | 1.44E-06 | 6.27625626 | 4.91182754 | 9.93850367 | 51.1523502  | 37.3442589  | 90.01781836 | Rpl36-ps2     |
| ENSMUSG00000051314  | 0.181510543  | -2.461874748 | 1.89E-07 | 1.44E-06 | 142.560678 | 151.284288 | 436.051849 | 36.94336403 | 50.74987262 | 44.51430578 | Ffar2         |
| ENSMUSG00000022270  | 0.355593356  | -1.491699725 | 1.90E-07 | 1.45E-06 | 282.431532 | 550.124684 | 391.328582 | 156.2988478 | 157.0373417 | 121.6724358 | Fam134b       |
| ENSMUSG00000044551  | 0.243024574  | -2.040825893 | 1.93E-07 | 1.47E-06 | 76.2116831 | 56.9771994 | 60.873335  | 17.0507834  | 14.3631751  | 15.82730872 | 9930012K11Rik |
| ENSMUSG00000026069  | 0.550721283  | -1.511603114 | 1.99E-07 | 1.52E-06 | 119.248869 | 183.70235  | 136.654426 | 51.1523502  | 56.49514122 | 46.49271937 | Ilrl1         |
| ENSMUSG00000034382  | 0.26761161   | -1.90178739  | 1.99E-07 | 1.52E-06 | 74.4184671 | 69.747951  | 98.1427238 | 23.68164361 | 17.2358058  | 23.74096308 | AI661453      |
| ENSMUSG00000044827  | 0.224950017  | -2.152323619 | 2.03E-07 | 1.55E-06 | 192.770728 | 326.145349 | 257.158783 | 96.62110594 | 41.17442496 | 36.60065142 | Tlrl1         |
| ENSMUSG00000036242  | 0.423358688  | -1.240047599 | 2.05E-07 | 1.56E-06 | 745.081279 | 420.452437 | 623.641106 | 242.5000306 | 247.0465497 | 268.0750451 | 3632451006Rik |
| ENSMUSG00000029380  | 0.252885381  | -1.983444458 | 2.11E-07 | 1.60E-06 | 293.190828 | 306.498038 | 457.171169 | 79.57032253 | 137.8864464 | 49.46033976 | Cxcl1         |
| ENSMUSG00000009476  | 0.00806562   | -4.298841349 | 2.11E-07 | 1.60E-06 | 22.4152009 | 86.4481467 | 62.115648  | 0.947265744 | 5.745268599 | 1.97841359  | BC147527      |
| ENSMUSG00000027670  | 0.057526977  | -7.05371375  | 2.11E-07 | 1.60E-06 | 23.311809  | 22.594067  | 24.8462592 | 0           | 0           | 0           | Ocst5amp      |
| ENSMUSG00000022893  | 2.103807163  | 1.073002472  | 2.19E-07 | 1.66E-06 | 4223.92046 | 3138.6578  | 2837.4428  | 5761.270258 | 7254.359151 | 8447.82603  | Adamts1       |
| ENSMUSG00000024696  | 0.243158644  | -2.040030216 | 2.20E-07 | 1.66E-06 | 149.733542 | 284.885997 | 314.305179 | 86.20118275 | 40.21688019 | 55.39558053 | Lpxn          |
| ENSMUSG00000026587  | 0.158170211  | -2.066450177 | 2.20E-07 | 1.66E-06 | 66.3489947 | 37.3298893 | 79.5080294 | 9.472657445 | 11.4905372  | 7.913654361 | Astn1         |
| ENSMUSG00000031517  | 0.463898308  | -1.10811951  | 2.21E-07 | 1.68E-06 | 853.570851 | 765.26273  | 581.402465 | 286.0742548 | 334.1831235 | 401.6179588 | Gpm6a         |
| ENSMUSG000000109857 | 2.722122232  | 1.44473185   | 2.23E-07 | 1.68E-06 | 89.6608037 | 71.7126821 | 85.7195942 | 165.7715053 | 225.0230201 | 281.9239366 | Gm32817       |
| ENSMUSG00000051331  | 2.116095429  | 1.081404669  | 2.24E-07 | 1.69E-06 | 1725.97047 | 1087.47862 | 1073.3584  | 2608.76986  | 2741.450666 | 2879.580981 | Cacna1c       |
| ENSMUSG00000029687  | 3.508492466  | 1.810851264  | 2.27E-07 | 1.71E-06 | 368.505903 | 368.387065 | 404.994025 | 624.2481256 | 1513.878276 | 1867.622429 | Ezh2          |
| ENSMUSG00000014813  | 0.464913001  | -1.104967324 | 2.33E-07 | 1.76E-06 | 619.556154 | 619.872635 | 911.857712 | 289.8633178 | 360.9943679 | 348.2007919 | Stc1          |
| ENSMUSG00000031253  | 0.458313772  | -1.125592457 | 2.38E-07 | 1.79E-06 | 618.659546 | 395.8933   | 597.552533 | 237.7637019 | 259.4946317 | 241.366458  | Srxp2         |
| ENSMUSG00000031609  | 0.227666554  | -2.13500573  | 2.38E-07 | 1.79E-06 | 93.2472359 | 215.138046 | 147.835242 | 44.52148999 | 34.47161159 | 24.73016988 | Sap30         |
| ENSMUSG00000022579  | 0.458297122  | -1.12564487  | 2.39E-07 | 1.80E-06 | 355.953931 | 326.145349 | 453.44423  | 154.4043163 | 203.9570353 | 161.2407076 | Gphbp1        |
| ENSMUSG00000034656  | 0.472603408  | -1.081298061 | 2.41E-07 | 1.82E-06 | 372.092335 | 260.32686  | 308.093614 | 145.8789246 | 141.7166254 | 157.2838804 | Cacna1a       |
| ENSMUSG00000040430  | 0.462278707  | -1.113165182 | 2.45E-07 | 1.84E-06 | 689.49158  | 960.753466 | 981.427238 | 465.1074805 | 427.0649658 | 323.470622  | Pitpnc1       |
| ENSMUSG00000032717  | 0.415437623  | -1.267296217 | 2.53E-07 | 1.90E-06 | 188.287688 | 170.931598 | 216.162455 | 70.09766509 | 71.81585748 | 96.94226592 | Mdf1          |
| ENSMUSG00000005447  | 0.307486576  | -1.701404666 | 2.55E-07 | 1.91E-06 | 95.93706   | 110.024937 | 150.319868 | 30.31250382 | 35.42519536 | 43.52509899 | Padf1h1b3     |
| ENSMUSG00000030867  | 0.276611482  | -1.854067054 | 2.57E-07 | 1.92E-06 | 78.0048992 | 91.3599922 | 116.777418 | 32.20703531 | 26.81125346 | 19.7841359  | Pik1          |
| ENSMUSG00000074934  | 0.179852647  | -2.475112704 | 2.60E-07 | 1.95E-06 | 104.006532 | 117.883861 | 67.0848998 | 9.472657445 | 27.76879823 | 14.83810193 | Grem1         |
| ENSMUSG00000024901  | 2.428060394  | 1.279804307  | 2.61E-07 | 1.95E-06 | 78.0048992 | 63.853758  | 57.1463961 | 153.4570506 | 151.2920731 | 181.0248435 | Pel13         |
| ENSMUSG00000087400  | 2.655719682  | 1.409102874  | 2.61E-07 | 1.95E-06 | 101.316708 | 56.9771994 | 78.2657164 | 191.3476804 | 209.7023039 | 228.5067697 | Gm15270       |
| ENSMUSG00000047261  | 0.342751099  | -1.544766804 | 2.63E-07 | 1.96E-06 | 123.731909 | 91.3599922 | 134.1698   | 42.6269585  | 39.2593342  | 37.58985821 | Gap43         |
| ENSMUSG00000016206  | 0.45128451   | -1.147890835 | 2.63E-07 | 1.96E-06 | 363.126255 | 532.442105 | 354.059193 | 177.1386942 | 197.2542519 | 189.9277047 | H2-M3         |
| ENSMUSG00000036095  | 2.014237925  | 1.010234107  | 2.63E-07 | 1.96E-06 | 566.656279 | 386.069644 | 377.66314  | 914.1114434 | 857.002566  | 913.0378719 | Dgk3          |
| ENSMUSG00000055093  | 6.000654797  | 2.585119937  | 2.64E-07 | 1.97E-06 | 10.7592964 | 30.4533307 | 31.057824  | 101.3574347 | 110.1176481 | 218.6147017 | Gm8430        |
| ENSMUSG00000028464  | 2.252524814  | 1.171542999  | 2.65E-07 | 1.97E-06 | 1798.647   | 34167.6547 | 22704.5116 | 54383.47366 | 57923.79801 | 56318.51047 | Tpm2          |
| ENSMUSG00000000031  | 0.038452299  | -4.700786345 | 2.66E-07 | 1.98E-06 | 4501.86895 | 15932.9862 | 5790.4207  | 302.1777725 | 631.0220011 | 75.17971643 | H19           |
| ENSMUSG00000031750  | 0.286515996  | -1.803312407 | 2.67E-07 | 1.99E-06 | 218.772361 | 201.384929 | 303.124362 | 53.04688169 | 103.4148348 | 50.44954655 | H34           |
| ENSMUSG000000066363 | 0.070303276  | -3.830264273 | 2.68E-07 | 2.00E-06 | 23.111809  | 70.7303165 | 43.4809536 | 1.894531489 | 3.830179066 | 3.956827181 | Serpina3f     |
| ENSMUSG000000087411 | 3.713492133  | 1.893126142  | 2.71E-07 | 2.01E-06 | 25.351025  | 18.6649446 | 18.0515511 | 71.04493083 | 92.88184235 | 107.8235407 | Gm16048       |
| ENSMUSG00000033105  | 2.132744818  | 1.092711358  | 2.72E-07 | 2.02E-06 | 207.116457 | 157.178481 | 136.654426 | 372.2754376 | 330.3529444 | 369.9634414 | Lss           |
| ENSMUSG00000034906  | 0.301473183  | -1.729898421 | 2.75E-07 | 2.04E-06 | 160.492839 | 135.56644  | 100.62735  | 31.25976957 | 37.3442589  | 51.43875335 | Ncap          |
| ENSMUSG00000024806  | 0.285084583  | -1.810538074 | 2.81E-07 | 2.08E-06 | 81.5913314 | 65.818489  | 79.5080294 | 21.78711212 | 18.19355056 | 24.73016988 | Mlana         |
| ENSMUSG00000072966  | 2.994891421  | 1.582503699  | 2.87E-07 | 2.13E-06 | 153.319974 | 84.4834337 | 78.2657164 | 272.8125344 | 309.2869596 | 368.9741346 | Grasp2        |
| ENSMUSG00000041372  | 7.606716613  | 2.927273859  | 2.90E-07 | 2.15E-06 | 15.2423366 | 3.92946203 | 4.96925184 | 65.36133637 | 55.53759645 | 67.26606207 | B4galnt3      |
| ENSMUSG00000040867  | 0.190221649  | -2.394246645 | 3.05E-07 | 2.25E-06 | 135.387814 | 62.8713925 | 79.5080294 | 16.10351766 | 23.93861916 | 12.85968834 | Begain        |
| ENSMUSG00000026288  | 0.31492057   | -1.666940101 | 3.07E-07 | 2.27E-06 | 711.906781 | 1005.94228 | 988.881116 | 416.7969276 | 270.9851689 | 164.208328  | Inpp5d        |
| ENSMUSG00000031662  | 0.263435868  | -1.924476305 | 3.11E-07 | 2.29E-06 | 162.286055 | 352.669217 | 288.216607 | 98.51563742 | 58.41023075 | 54.40637373 | Snx20         |
| ENSMUSG00000051627  | 8.455471533  | 3.079885211  | 3.16E-07 | 2.33E-06 | 4.48304019 | 18.6649446 | 3.72693888 | 70.09766509 | 73.73094702 | 86.06099118 | Hist1h1e      |
| ENSMUSG00000073155  | 3.168011492  | 1.663577569  | 3.16E-07 | 2.33E-06 | 1049.0314  | 1418.53579 | 1663.45705 | 2443.945621 | 6364.800063 | 4275.351769 | 1810058124Rik |
| ENSMUSG00000015202  | 2.023257651  | 1.016680051  | 3.18E-07 | 2.34E-06 | 400.783793 | 311.409866 | 381.390078 | 627.        |             |             |               |

|                      |             |              |          |          |             |            |            |             |              |             |               |
|----------------------|-------------|--------------|----------|----------|-------------|------------|------------|-------------|--------------|-------------|---------------|
| ENSMUSG00000040254   | 2.560696797 | 1.356536438  | 4.05E-07 | 2.93E-06 | 908.263942  | 714.179724 | 421.144093 | 1952.314699 | 1592.396947  | 1694.51124  | Sema3d        |
| ENSMUSG00000028684   | 2.367835661 | 1.243568955  | 4.18E-07 | 3.02E-06 | 715.493214  | 777.051116 | 662.152807 | 1103.564592 | 1903.598996  | 2096.129199 | Urod          |
| ENSMUSG00000003746   | 0.497233978 | -1.008003209 | 4.24E-07 | 3.06E-06 | 3061.01984  | 2158.25702 | 1915.64658 | 1283.545084 | 1132.774559  | 1132.64178  | Man1a         |
| ENSMUSG000000079465  | 4.005369388 | 2.001935299  | 4.28E-07 | 3.08E-06 | 130.904773  | 97.2541852 | 39.7540147 | 289.8633178 | 355.2491084  | 434.2617831 | Col4a3        |
| ENSMUSG000000068699  | 2.109901067 | 1.077175353  | 4.30E-07 | 3.10E-06 | 1851.4956   | 3073.82167 | 2248.58646 | 4747.695911 | 5877.409776  | 4510.782986 | Flncl         |
| ENSMUSG000000051076  | 93.99725242 | 6.554546682  | 4.37E-07 | 3.15E-06 | 0           | 0.98236551 | 0          | 38.83789552 | 30.64143253  | 34.62223783 | Vtcln1        |
| ENSMUSG000000056413  | 0.331029631 | -1.594967734 | 4.46E-07 | 3.21E-06 | 168.562311  | 342.845562 | 310.57824  | 101.3574347 | 82.34884991  | 88.03940477 | Adap1         |
| ENSMUSG000000059406  | 8.402056196 | 3.070742435  | 4.50E-07 | 3.23E-06 | 2.68982411  | 3.92946203 | 8.69619071 | 39.78516127 | 40.21688019  | 43.52509899 | Tmprss9       |
| ENSMUSG00000020990   | 7.767500807 | 2.957450486  | 4.60E-07 | 3.30E-06 | 20.6219849  | 6.87655855 | 3.72693888 | 65.36133637 | 99.58465571  | 84.08257759 | Cdk1          |
| ENSMUSG000000075588  | 2.053584797 | 1.03814452   | 4.61E-07 | 3.30E-06 | 90.5574117  | 81.5363371 | 84.4772812 | 181.8750229 | 171.4005132  | 174.1003959 | Hoxb2         |
| ENSMUSG000000030474  | 0.224469404 | -2.155409282 | 4.65E-07 | 3.33E-06 | 67.2456028  | 122.795688 | 127.958235 | 21.78711212 | 32.55652206  | 16.81651552 | Siglece       |
| ENSMUSG00000002668   | 0.238850703 | -2.065818975 | 4.66E-07 | 3.34E-06 | 186.494472  | 294.709652 | 269.581912 | 97.56837168 | 47.87723832  | 33.6303103  | Dennd1c       |
| ENSMUSG000000016283  | 0.026041452 | -5.263046306 | 4.67E-07 | 3.34E-06 | 21.5185929  | 123.778054 | 38.5117017 | 3.789062978 | 0.957544766  | 0           | H2-M2         |
| ENSMUSG00000003910   | 0.233888628 | 1.024240682  | 4.67E-07 | 3.34E-06 | 3616.91682  | 2509.94387 | 2218.77095 | 5690.225327 | 5101.798516  | 6187.488504 | Gucy1a1       |
| ENSMUSG000000027323  | 0.302673165 | -1.724167323 | 4.69E-07 | 3.36E-06 | 76.2116831  | 102.166013 | 93.1734719 | 20.83984638 | 29.68388776  | 31.65461744 | Rad51         |
| ENSMUSG000000039145  | 0.412961721 | -1.275920036 | 4.85E-07 | 3.46E-06 | 439.337938  | 477.429637 | 508.106    | 269.9707372 | 165.6552446  | 152.3378465 | Camk1d        |
| ENSMUSG000000048120  | 2.307020852 | 1.206031044  | 4.85E-07 | 3.46E-06 | 3928.93642  | 3027.65049 | 1969.06604 | 7338.467722 | 6334.15863   | 6925.436773 | Entpd1        |
| ENSMUSG000000035914  | 0.447583923 | -1.15976988  | 4.86E-07 | 3.46E-06 | 610.590073  | 511.812429 | 850.984377 | 256.7090167 | 315.0322282  | 310.6109337 | Cd276         |
| ENSMUSG000000003059  | 0.439874704 | -1.184835457 | 4.91E-07 | 3.50E-06 | 280.638316  | 215.138046 | 321.759056 | 104.1992319 | 126.3959092  | 128.5968834 | Rem1          |
| ENSMUSG0000000109498 | 3.816481541 | 1.932243214  | 4.93E-07 | 3.51E-06 | 18.8287688  | 13.7531171 | 19.8770073 | 74.83399381 | 62.24040982  | 62.32004809 | Gm45222       |
| ENSMUSG000000030110  | 0.407029977 | -1.296793046 | 4.95E-07 | 3.52E-06 | 268.982411  | 403.752224 | 426.113345 | 149.6679876 | 175.2306923  | 121.6724358 | Ret           |
| ENSMUSG000000037446  | 3.001327973 | 1.58560098   | 5.05E-07 | 3.59E-06 | 36.37575376 | 36.3475238 | 52.1771443 | 111.7773578 | 109.1601034  | 155.3054668 | Tulp1         |
| ENSMUSG000000051379  | 0.33203603  | -1.589434727 | 5.11E-07 | 3.63E-06 | 86.9709796  | 96.2718197 | 74.5387776 | 28.41797233 | 27.76879823  | 29.67620385 | Flnk3         |
| ENSMUSG000000042515  | 3.010265282 | 1.589890631  | 5.21E-07 | 3.70E-06 | 113.869221  | 74.6597786 | 54.6617702 | 198.9258063 | 278.645527   | 259.1721803 | Mum11l        |
| ENSMUSG000000030249  | 2.014845303 | 1.010669075  | 5.25E-07 | 3.73E-06 | 3960.3177   | 2683.82257 | 2391.45245 | 6322.998844 | 5787.400568  | 6100.438306 | Abcc9         |
| ENSMUSG000000041020  | 2.199065953 | 1.136893235  | 5.33E-07 | 3.78E-06 | 211.599497  | 143.425364 | 159.016059 | 341.9629338 | 441.4281373  | 349.1899987 | Map7d2        |
| ENSMUSG000000024186  | 2.228621897 | 1.156151873  | 5.33E-07 | 3.78E-06 | 109.386181  | 101.183647 | 74.5387776 | 199.8730721 | 208.7447591  | 230.4851833 | Rgs11         |
| ENSMUSG000000079491  | 0.320482448 | -1.641682749 | 5.42E-07 | 3.83E-06 | 147.043718  | 261.309225 | 147.835242 | 65.36133637 | 51.70741739  | 61.3308213  | H2-T10        |
| ENSMUSG000000052371  | 0.275011634 | -1.862435442 | 5.44E-07 | 3.85E-06 | 100.65632   | 130.654613 | 176.40844  | 28.41797233 | 62.6466215   | 31.65461744 | Hoxd30s1      |
| ENSMUSG000000026970  | 0.484128138 | -1.046539146 | 5.58E-07 | 3.94E-06 | 3494.97813  | 4351.8792  | 6058.7603  | 2116.191673 | 2371.838386  | 2242.531805 | Rbms1         |
| ENSMUSG000000105302  | 0.081734933 | -3.612903374 | 5.63E-07 | 3.98E-06 | 30.4846733  | 64.8316235 | 176.40844  | 6.630860211 | 10.53299243  | 9.446033976 | Gm19817       |
| ENSMUSG000000046179  | 0.233990393 | -2.095478799 | 5.65E-07 | 3.99E-06 | 59.1761304  | 58.9419305 | 63.3579609 | 10.41992319 | 19.15089533  | 12.85968834 | E2f8          |
| ENSMUSG000000038555  | 2.192167962 | 1.132358341  | 5.70E-07 | 4.02E-06 | 132.697989  | 110.024937 | 116.777418 | 312.5976957 | 258.5370869  | 217.6254949 | Reep2         |
| ENSMUSG000000109715  | 0.210445388 | -2.248482199 | 5.70E-07 | 4.02E-06 | 54.6930903  | 68.7655855 | 83.2349683 | 10.41992319 | 21.06598486  | 11.87048154 | Gm45606       |
| ENSMUSG000000020553  | 0.40201365  | -1.028553594 | 5.74E-07 | 4.04E-06 | 169.458919  | 182.719984 | 185.104631 | 88.09571424 | 92.88184235  | 82.104164   | Pcnp          |
| ENSMUSG000000040856  | 0.09104904  | -3.457212392 | 5.77E-07 | 4.06E-06 | 107.592964  | 94.3070887 | 242.251027 | 4.736328722 | 29.68388776  | 5.935240771 | Dlk1          |
| ENSMUSG000000015652  | 0.049943885 | -4.323548127 | 5.81E-07 | 4.09E-06 | 20.6219849  | 35.3651583 | 40.9963277 | 1.894531489 | 0.957544766  | 1.97841359  | Steap1        |
| ENSMUSG000000022346  | 0.481586401 | -1.054133442 | 5.93E-07 | 4.17E-06 | 282.431532  | 342.845562 | 371.451575 | 138.3007987 | 186.7212295  | 154.31626   | Myc           |
| ENSMUSG000000061451  | 0.23953558  | -2.061688128 | 6.11E-07 | 4.29E-06 | 56.4863063  | 57.9595649 | 58.3887091 | 16.10351766 | 15.32071626  | 9.892067951 | Tmem151a      |
| ENSMUSG000000031209  | 0.369170417 | -1.437641146 | 6.26E-07 | 4.39E-06 | 442.027762  | 376.245989 | 262.128034 | 96.62110594 | 14.7166254   | 161.2407076 | Heph          |
| ENSMUSG000000051204  | 0.35252923  | -2.886268326 | 6.34E-07 | 4.45E-06 | 40.3473617  | 77.6068751 | 139.139051 | 11.36718893 | 15.32071626  | 7.913654361 | Siglech       |
| ENSMUSG000000050022  | 0.310971756 | -1.685144543 | 6.35E-07 | 4.45E-06 | 130.904773  | 215.138046 | 226.100959 | 42.6269585  | 74.68849178  | 60.3416145  | Amz1          |
| ENSMUSG000000078920  | 0.326349591 | -1.615509862 | 6.44E-07 | 4.51E-06 | 432.165074  | 1006.92465 | 680.787502 | 185.6640859 | 218.3202067  | 287.8591774 | Ifi47         |
| ENSMUSG000000032656  | 3.716231047 | 1.8938402    | 6.44E-07 | 4.52E-06 | 188.287688  | 142.442999 | 157.773746 | 277.5488631 | 853.1723869  | 685.520309  | 3-Mar         |
| ENSMUSG000000070427  | 0.438949078 | -1.18787451  | 6.47E-07 | 4.53E-06 | 180.218215  | 217.102777 | 195.043135 | 74.83399381 | 79.47621561  | 105.8451271 | Il18bp        |
| ENSMUSG000000081434  | 6.46043749  | 2.691631865  | 6.56E-07 | 4.59E-06 | 956.628841  | 12.7707516 | 23.308851  | 54.94141318 | 139.8015359  | 122.6616426 | Gm14165       |
| ENSMUSG000000054072  | 0.250199919 | -1.998846774 | 6.61E-07 | 4.62E-06 | 118.626437  | 4295.88436 | 2309.45979 | 614.7754682 | 515.1590843  | 812.1387788 | Ilgp1         |
| ENSMUSG000000069255  | 0.498563707 | -1.004150231 | 6.74E-07 | 4.71E-06 | 303.053517  | 371.334162 | 408.720964 | 160.0879108 | 202.9994905  | 176.0788095 | Dusp22        |
| ENSMUSG000000082292  | 0.177342735 | -2.495387868 | 6.76E-07 | 4.72E-06 | 86.9709796  | 278.009439 | 192.558509 | 17.99804914 | 36.38670112  | 44.51430578 | Gm12250       |
| ENSMUSG000000040183  | 0.360755704 | -1.470905888 | 6.81E-07 | 4.75E-06 | 141.66407   | 98.2365508 | 106.838914 | 41.67969276 | 43.08951449  | 40.5574786  | Ankrd6        |
| ENSMUSG00000006398   | 0.387465364 | -1.378607444 | 6.89E-07 | 4.80E-06 | 126.421733  | 143.425364 | 177.650753 | 49.25781871 | 56.49514122  | 67.2606207  | Cdc20         |
| ENSMUSG000000074825  | 0.491942689 | -1.023437842 | 7.07E-07 | 4.92E-06 | 248.360426  | 299.62148  | 293.185858 | 127.8808755 | 123.5232749  | 162.2299144 | Htpripl1      |
| ENSMUSG000000037411  | 2.035471041 | 1.025362696  | 7.10E-07 | 4.94E-06 | 5115.14885  | 6122.10184 | 8484.99751 | 11566.11474 | 14163.08464  | 14408.78618 | Serpine1      |
| ENSMUSG000000048065  | 2.292054882 | 1.196641589  | 7.15E-07 | 4.97E-06 | 69.0388189  | 65.818489  | 74.5387776 | 181.8750229 | 137.8464464  | 159.262294  | Cybsr2        |
| ENSMUSG000000058704  | 3.136453699 | 1.649134266  | 7.17E-07 | 4.98E-06 | 525.41231   | 724.985745 | 732.964646 | 1052.412242 | 2781.667547  | 2384.977583 | Memo1         |
| ENSMUSG000000023868  | 0.434561101 | -1.202369056 | 7.38E-07 | 5.13E-06 | 165.872487  | 137.531171 | 137.896738 | 58.73047616 | 63.19795459  | 70.23368245 | Pde10a        |
| ENSMUSG000000001020  | 0.223232852 | -1.223532619 | 7.45E-07 | 5.17E-06 | 125.45804   | 2165.13358 | 213.18673  | 738.8672807 | 941.26565054 | 773.5597138 | S100a4        |
| ENSMUSG000000050395  | 0.145885158 | -2.777094979 | 7.59E-07 | 5.26E-06 | 34.9677134  | 63.853758  | 39.7540147 | 8.5253917   | 5.745268599  | 5.935240771 | Tnfrsf15      |
| ENSMUSG000000026433  | 0.498326989 | -1.004835383 | 7.62E-07 | 5.28E-06 | 579.208792  | 583.525111 | 847.257438 | 337.226605  | 353.3340188  | 309.6217269 | Rab29         |
| ENSMUSG000000028341  | 3.27654378  | 1.712174809  | 7.82E-07 | 5.41E-06 | 137.18103   | 243.626646 | 272.066538 | 432.9004452 | 765.0782684  | 937.7680418 | Nra43         |
| ENSMUSG000000109160  | 154.3548597 | 7.270107095  | 7.90E-07 | 5.46E-06 | 0           | 0          | 0          | 11.36718893 | 52.66496215  | 23.74096308 | 4930598N05Rik |
| ENSMUSG000000015709  | 0.21711193  | -2.203489093 | 8.21E-07 | 5.66E-06 | 56.4863063  | 68.7655855 | 74.5387776 | 13.26172042 | 21.06598486  | 8.902861156 | Arnt2         |
| ENSMUSG000000079462  | 9.074264091 | 3.181780647  | 8.32E-07 | 5.74E-06 | 7.1728643   | 3.92946203 | 2.48462592 | 57.78321041 | 35.42915636  | 33.6303103  | Gm15737       |
| ENSMUSG000000028289  | 2.906369748 | 1.539218254  | 8.37E-07 | 5.77E-06 | 45.7270099  | 27.5062342 | 40.9963277 | 100.4101689 | 115.8629167  | 115.737195  | Epha7         |
| ENSMUSG000000020808  | 0.230488699 | -2.117232077 | 8.46E-07 | 5.82E-06 | 68.1422108  | 92.3423577 | 100.62735  | 14.20898617 | 15.32071626  | 30.66541065 | Pimreg        |
| ENSMUSG000000022408  | 0.130641411 | -2.936315816 | 8.47E-07 | 5.83E-06 | 37.6575376  | 38.3122548 | 64.6002739 | 9.472657445 | 3.830179066  | 4.946033976 | Fam83f        |
| ENSMUSG000000027674  | 3.165654288 | 1.662503712  | 8.55E-07 | 5.88E-06 | 77.1082912  | 49.1182754 | 39.7540147 | 148.7207219 | 221.192841   | 159.262294  | Pex5l         |
| ENSMUSG000000016758  | 2.060660508 | 1.043106     |          |          |             |            |            |             |              |             |               |

|                     |              |              |          |          |            |            |            |             |             |              |               |
|---------------------|--------------|--------------|----------|----------|------------|------------|------------|-------------|-------------|--------------|---------------|
| ENSMUSG00000029605  | 0.386390794  | -1.371867373 | 1.08E-06 | 7.31E-06 | 148.836934 | 217.102777 | 187.589257 | 70.09766509 | 87.13657375 | 56.38478732  | Oas1b         |
| ENSMUSG00000098188  | 0.492566862  | -1.021608522 | 1.09E-06 | 7.42E-06 | 554.103767 | 389.016741 | 562.767771 | 229.2383102 | 277.6879823 | 234.4420104  | Sowahc        |
| ENSMUSG00000020953  | 4.187674674  | 2.066149369  | 1.10E-06 | 7.46E-06 | 25.105025  | 16.7002136 | 9.93850367 | 76.7285253  | 76.6038132  | 67.26606207  | Coch          |
| ENSMUSG00000022330  | 0.182060309  | -2.457511657 | 1.11E-06 | 7.51E-06 | 60.9693465 | 58.9419305 | 86.9619071 | 18.94531489 | 5.745268894 | 12.85968834  | Os2r          |
| ENSMUSG00000058443  | 4.3673704    | 2.126764892  | 1.11E-06 | 7.53E-06 | 15.2423366 | 14.7354826 | 29.815511  | 76.7285253  | 111.0751929 | 69.24447566  | Rpl10-ps3     |
| ENSMUSG00000028931  | 0.326440784  | -1.165106784 | 1.12E-06 | 7.61E-06 | 168.562311 | 270.150515 | 223.616333 | 97.56837168 | 69.90076795 | 48.477113296 | Kcnab2        |
| ENSMUSG00000029134  | 2.408044275  | 1.267861918  | 1.13E-06 | 7.63E-06 | 68.1422108 | 58.9419305 | 45.9655795 | 141.1425959 | 132.1411778 | 146.4026057  | Plb1          |
| ENSMUSG00000032066  | 0.106326023  | -3.233433366 | 1.13E-06 | 7.64E-06 | 34.0711054 | 59.924296  | 59.631022  | 10.41992319 | 3.830179066 | 1.97841359   | Bco2          |
| ENSMUSG00000027238  | 0.351352392  | -1.509009374 | 1.15E-06 | 7.79E-06 | 217.875753 | 163.072674 | 116.777418 | 60.62500765 | 58.41023075 | 56.38478732  | FrmD5         |
| ENSMUSG00000033470  | 8.916807951  | 3.156527345  | 1.15E-06 | 7.79E-06 | 7.1728643  | 11.7883861 | 4.96925184 | 44.52148999 | 127.3534539 | 43.52509899  | Cysltr2       |
| ENSMUSG00000017400  | 0.204020182  | -2.293216219 | 1.16E-06 | 7.83E-06 | 68.1422108 | 89.3952612 | 73.2964646 | 14.20898617 | 24.89616393 | 7.913654361  | Stac2         |
| ENSMUSG00000027875  | 2.759432158  | 1.464371416  | 1.16E-06 | 7.83E-06 | 433.061682 | 280.956535 | 551.586954 | 1571.51387  | 884.7713642 | 1032.731894  | Hmgcs2        |
| ENSMUSG00000040061  | 0.294050078  | -1.765866219 | 1.16E-06 | 7.85E-06 | 129.111557 | 212.19095  | 140.381364 | 61.57227339 | 30.64143253 | 49.46033976  | Plcb2         |
| ENSMUSG00000046312  | 0.544423357  | -1.137891103 | 1.18E-06 | 7.96E-06 | 511.066581 | 622.819732 | 393.813208 | 274.7070659 | 220.2352963 | 199.8197726  | Al464131      |
| ENSMUSG00000085282  | 3.364681892  | 1.750470114  | 1.20E-06 | 8.07E-06 | 50.2100501 | 40.2769858 | 27.3308851 | 99.46290317 | 130.2260882 | 170.1435688  | Gm15663       |
| ENSMUSG00000053541  | 11.9432554   | 3.578144776  | 1.22E-06 | 8.24E-06 | 15.2423366 | 14.7354826 | 0          | 190.4004146 | 75.64603655 | 99.90988631  | Gm4759        |
| ENSMUSG00000028444  | 0.437075039  | -1.194047104 | 1.23E-06 | 8.28E-06 | 208.909673 | 148.337192 | 162.742998 | 72.93946232 | 77.56112608 | 77.15813002  | Cntfr         |
| ENSMUSG00000028197  | 0.089953279  | -3.474680319 | 1.24E-06 | 8.36E-06 | 115.662437 | 143.425364 | 81.9926553 | 4.736328722 | 23.93861916 | 1.97841359   | Col24a1       |
| ENSMUSG00000006519  | 0.422048197  | -1.244520334 | 1.25E-06 | 8.38E-06 | 1219.38693 | 2348.83593 | 2347.97149 | 794.7559596 | 898.1769909 | 803.2359176  | Cyba          |
| ENSMUSG00000057706  | 0.344911018  | -1.53570388  | 1.27E-06 | 8.52E-06 | 201.736808 | 126.72515  | 178.893066 | 71.04493083 | 61.28286505 | 42.53654913  | Mec3b         |
| ENSMUSG00000105282  | 0.156140043  | -2.679087524 | 1.29E-06 | 8.66E-06 | 38.5541456 | 127.707516 | 136.654426 | 18.94531489 | 14.3631715  | 13.84889513  | Gm42981       |
| ENSMUSG00000003123  | 0.484839451  | -1.044421    | 1.31E-06 | 8.80E-06 | 3364.96996 | 2098.33272 | 3576.61901 | 1455.000183 | 1578.99132  | 1348.288862  | Lipe          |
| ENSMUSG00000034872  | 7.730195507  | 2.950504902  | 1.31E-06 | 8.80E-06 | 9.86268841 | 622.819732 | 4.96925184 | 58.73047616 | 35.42915636 | 45.50351258  | Gipc3         |
| ENSMUSG00000060470  | 0.391737678  | -1.352040198 | 1.33E-06 | 8.87E-06 | 293.190828 | 241.661915 | 183.862318 | 71.99219658 | 103.4148348 | 106.8343339  | Adgrg3        |
| ENSMUSG00000046101  | 8.411210522  | 3.072313445  | 1.33E-06 | 8.91E-06 | 5.37964822 | 5.89419305 | 7.45387776 | 24.62890936 | 59.36777552 | 72.21209604  | Mcmdc2        |
| ENSMUSG00000030616  | 0.482001956  | -1.052889094 | 1.34E-06 | 8.92E-06 | 569.346104 | 447.958671 | 441.021101 | 231.1328416 | 188.636319  | 283.9023502  | Syt12         |
| ENSMUSG00000096967  | 2.623886506  | 1.391705319  | 1.34E-06 | 8.95E-06 | 47.520226  | 33.4004273 | 39.7540147 | 101.3574347 | 107.2450138 | 108.8127475  | Gm26621       |
| ENSMUSG00000051220  | 0.262235391  | -1.931065691 | 1.37E-06 | 9.14E-06 | 74.4184671 | 63.853758  | 52.1771443 | 19.89258063 | 14.3631715  | 15.82730872  | Erccl6        |
| ENSMUSG00000095332  | 3.444062348  | 1.78411126   | 1.39E-06 | 9.28E-06 | 155.11319  | 140.478268 | 52.1771443 | 448.0566741 | 400.2537124 | 355.1252395  | Gm9821        |
| ENSMUSG00000084319  | 3.092278854  | 1.628670424  | 1.40E-06 | 9.32E-06 | 349.677134 | 499.041678 | 587.61403  | 864.8536247 | 2194.692605 | 1378.954272  | Tpt1-ps3      |
| ENSMUSG00000027004  | 2.420747906  | 1.275452846  | 1.48E-06 | 9.81E-06 | 173.941959 | 205.314391 | 103.111976 | 381.748095  | 384.9329961 | 405.574786   | Frzb          |
| ENSMUSG00000018459  | 0.103206146  | -3.276399212 | 1.49E-06 | 9.89E-06 | 34.9677134 | 57.9595649 | 84.4772812 | 4.736328722 | 11.4905372  | 1.97841359   | Slc13a3       |
| ENSMUSG00000046031  | 0.093774385  | -3.414662291 | 1.50E-06 | 9.93E-06 | 34.0711054 | 125.742785 | 109.32354  | 1.894531489 | 11.4905372  | 11.87048154  | Fam26f        |
| ENSMUSG00000060131  | 0.301810943  | -1.72828298  | 1.51E-06 | 1.00E-05 | 150.63015  | 184.684715 | 157.737346 | 75.78125956 | 39.25933542 | 33.63303103  | Atp8b4        |
| ENSMUSG00000044708  | 0.141314949  | -2.823014008 | 1.52E-06 | 1.01E-05 | 34.0711054 | 38.3122548 | 50.9348313 | 7.578125956 | 2.872634299 | 6.924447566  | Gbnj10        |
| ENSMUSG00000062082  | 0.081681083  | -3.613854191 | 1.53E-06 | 1.01E-05 | 23.311809  | 87.4305302 | 42.2386406 | 4.736328722 | 5.745268599 | 1.97841359   | Cd200r4       |
| ENSMUSG00000030346  | 0.180671776  | -2.468556942 | 1.56E-06 | 1.03E-05 | 57.3829144 | 70.7303165 | 59.631022  | 4.736328722 | 11.4905372  | 17.80572231  | Rad51ap1      |
| ENSMUSG00000038822  | 2.487304474  | 1.314583121  | 1.59E-06 | 1.05E-05 | 390.921104 | 282.921266 | 290.701232 | 535.2051456 | 823.4884991 | 1042.623962  | Hace1         |
| ENSMUSG00000106112  | 0.116423999  | -3.102539618 | 1.60E-06 | 1.05E-05 | 31.3812813 | 27.5062342 | 40.9963277 | 2.841797233 | 3.830179066 | 4.946033976  | Gm43434       |
| ENSMUSG00000078945  | 0.321947907  | -1.635100824 | 1.60E-06 | 1.06E-05 | 420.426632 | 254.432666 | 135.412113 | 82.41211977 | 47.87723832 | 61.3308213   | Naip2         |
| ENSMUSG00000027852  | 0.483577646  | -1.048180539 | 1.61E-06 | 1.06E-05 | 1749.28228 | 2416.61915 | 3043.66675 | 1056.201305 | 1305.133517 | 1123.738919  | Nras          |
| ENSMUSG00000036875  | 0.266052739  | -1.910215836 | 1.65E-06 | 1.09E-05 | 181.114823 | 231.83826  | 113.050479 | 64.41407062 | 45.96214879 | 29.67620385  | Dna2          |
| ENSMUSG00000084846  | 2.363740147  | 1.241071445  | 1.65E-06 | 1.09E-05 | 48.416834  | 46.1711789 | 50.9348313 | 117.4609523 | 105.3299243 | 120.683229   | A730011C13Rik |
| ENSMUSG00000082868  | 0.311003106  | -1.684999108 | 1.66E-06 | 1.09E-05 | 1034.68567 | 2395.98947 | 1413.75215 | 337.226605  | 468.2393908 | 701.3476177  | Gbp3          |
| ENSMUSG00000060441  | 0.479176818  | -1.061369981 | 1.71E-06 | 1.13E-05 | 264.499371 | 371.334162 | 375.178514 | 181.8750229 | 145.5468045 | 156.2946736  | Trim5         |
| ENSMUSG00000054659  | 4.984191302  | 2.317359443  | 1.71E-06 | 1.13E-05 | 14.3457286 | 20.6296757 | 8.69619071 | 86.20118275 | 47.87723832 | 86.06099118  | Pm20d2        |
| ENSMUSG00000094335  | 0.304669495  | -1.714683038 | 1.76E-06 | 1.15E-05 | 94.1438439 | 77.6068751 | 62.0002739 | 28.41797233 | 22.02352963 | 21.76254949  | Igkv1-117     |
| ENSMUSG00000066357  | 2.056687114  | 1.040322332  | 1.76E-06 | 1.16E-05 | 958.473992 | 618.89027  | 631.094983 | 1346.064623 | 1439.189784 | 1760.788095  | Wdr6          |
| ENSMUSG00000025092  | 0.447097876  | -1.161337403 | 1.77E-06 | 1.16E-05 | 962.060424 | 749.544882 | 525.498382 | 302.1777725 | 334.1831235 | 365.0173074  | Hspa12a       |
| ENSMUSG00000041361  | 0.465937682  | -1.101791084 | 1.77E-06 | 1.16E-05 | 374.782159 | 336.951369 | 305.608988 | 126.9336098 | 100.1268562 | 147.3918125  | Myzap         |
| ENSMUSG00000095597  | 3.23925297   | 1.69566114   | 1.81E-06 | 1.19E-05 | 27.7948491 | 37.3298893 | 29.815511  | 74.83399381 | 205.3299243 | 127.6076766  | Gm6472        |
| ENSMUSG00000025597  | 0.33932676   | -1.559252885 | 1.85E-06 | 1.21E-05 | 931.575751 | 619.872635 | 361.513071 | 203.6621351 | 207.7872143 | 238.3988376  | Khlh4         |
| ENSMUSG00000025747  | 0.467683023  | -1.096397035 | 1.87E-06 | 1.22E-05 | 232.358793 | 247.556108 | 282.005042 | 96.62110594 | 140.7590807 | 113.7587814  | Tyms          |
| ENSMUSG00000043631  | 2.536501501  | 1.342840014  | 1.89E-06 | 1.23E-05 | 2396.63328 | 1228.93925 | 1132.98942 | 4340.371641 | 3609.943769 | 4124.992336  | Ecm2          |
| ENSMUSG00000021697  | 7.113500153  | 2.830559603  | 1.92E-06 | 1.25E-05 | 7.1728643  | 14.7354826 | 22.3616333 | 43.57422425 | 122.5657301 | 144.4241921  | Depdc1b       |
| ENSMUSG00000021373  | 2.322978509  | 1.215975807  | 1.92E-06 | 1.25E-05 | 806.050625 | 1385.13537 | 706.876074 | 2308.486619 | 2375.668566 | 2050.625686  | Cap2          |
| ENSMUSG00000038352  | 0.3482639085 | -1.385943847 | 1.92E-06 | 1.25E-05 | 115.662437 | 184.684715 | 163.955311 | 65.36133637 | 51.70741739 | 60.3416145   | Ar1sc         |
| ENSMUSG00000030745  | 0.230312586  | -2.118334839 | 1.95E-06 | 1.27E-05 | 114.765829 | 244.609011 | 241.008714 | 71.04493083 | 39.25933542 | 27.69779026  | Il21r         |
| ENSMUSG00000037999  | 2.589366517  | 1.3725992    | 1.96E-06 | 1.27E-05 | 215.185929 | 128.689881 | 121.74667  | 467.002012  | 315.0322282 | 427.3737355  | Arap2         |
| ENSMUSG000000101102 | 15.05159919  | 3.911844873  | 1.97E-06 | 1.28E-05 | 0.89660804 | 6.87655855 | 6.1215648  | 42.6265985  | 132.1411778 | 31.65461744  | Gm28609       |
| ENSMUSG00000074151  | 0.348677742  | -1.520033821 | 1.99E-06 | 1.30E-05 | 458.166707 | 1009.87174 | 506.863687 | 204.6094008 | 224.0654753 | 260.1613871  | Nlrc5         |
| ENSMUSG00000021792  | 2.940128743  | 1.555879329  | 2.01E-06 | 1.31E-05 | 929.782534 | 665.061449 | 1027.39282 | 1505.205268 | 3868.480856 | 2334.528037  | Fam213a       |
| ENSMUSG00000045180  | 0.376011354  | -1.411151871 | 2.02E-06 | 1.31E-05 | 162.86055  | 139.495902 | 99.3850367 | 52.09961595 | 48.83478309 | 50.44954655  | Shroom2       |
| ENSMUSG00000005338  | 0.47987587   | -1.059266824 | 2.05E-06 | 1.33E-05 | 737.011806 | 654.255428 | 477.048176 | 250.0781565 | 306.4143253 | 341.2763443  | Cadm3         |
| ENSMUSG00000066443  | 22.51544899  | 4.492843342  | 2.07E-06 | 1.34E-05 | 0          | 2.94709652 | 1.24231296 | 34.1015668  | 22.98107439 | 35.61144462  | Gm10163       |
| ENSMUSG00000046589  | 0.133249751  | -2.907795255 | 2.08E-06 | 1.35E-05 | 27.7948491 | 43.2240823 | 52.1771443 | 6.630860211 | 6.702813365 | 2.967620385  | Lrrc8e        |
| ENSMUSG00000036611  | 0.464740711  | -1.105502066 | 2.11E-06 | 1.36E-05 | 269.879019 | 380.175451 | 254.674157 | 126.9336098 | 143.631715  | 150.3594329  | Eepd1         |
| ENSMUSG00000091460  | 9.998831618  | 3.321903802  | 2.12E-   |          |            |            |            |             |             |              |               |

|                     |              |              |          |          |            |            |            |             |             |             |           |
|---------------------|--------------|--------------|----------|----------|------------|------------|------------|-------------|-------------|-------------|-----------|
| ENSMUSG00000064853  | 46.88169806  | 5.55095292   | 2.51E-06 | 1.60E-05 | 0.89660804 | 0.98236551 | 0          | 27.47070659 | 25.85370869 | 41.5466854  | Gm23442   |
| ENSMUSG00000021280  | 0.466251479  | -1.100819794 | 2.51E-06 | 1.60E-05 | 172.148743 | 191.561274 | 155.28912  | 80.51758828 | 69.90076795 | 91.99623195 | Exoc3l4   |
| ENSMUSG00000087881  | 52.35500655  | 5.710255599  | 2.52E-06 | 1.61E-05 | 0.89660804 | 0.98236551 | 0          | 32.20703531 | 20.1084401  | 53.41716694 | Gm22442   |
| ENSMUSG00000041235  | 0.304992618  | -1.713153773 | 2.55E-06 | 1.63E-05 | 485.064948 | 886.093688 | 1151.62411 | 288.9160521 | 323.6501311 | 156.2946736 | Chd7      |
| ENSMUSG00000032783  | 0.195827324  | -2.352346015 | 2.65E-06 | 1.69E-05 | 38.5541456 | 42.2417168 | 42.2386406 | 8.5253917   | 9.575447664 | 5.935240771 | Troap     |
| ENSMUSG00000043705  | 104.672366   | 6.709736803  | 2.67E-06 | 1.70E-05 | 0          | 0          | 0          | 26.52344084 | 20.1084401  | 12.85968834 | Capn13    |
| ENSMUSG00000031678  | 7.625275376  | 2.930789439  | 2.70E-06 | 1.71E-05 | 4.48304019 | 4.91182754 | 4.96925184 | 24.62890936 | 43.08951449 | 41.5466854  | Myk13     |
| ENSMUSG00000055235  | 0.203703395  | -2.295458071 | 2.70E-06 | 1.71E-05 | 49.313442  | 43.2240823 | 44.7232665 | 11.36718893 | 5.745268599 | 10.88127475 | Wdr86     |
| ENSMUSG00000039934  | 0.44093589   | -1.181359186 | 2.70E-06 | 1.72E-05 | 225.048617 | 355.616314 | 262.128034 | 106.0937634 | 135.0138121 | 130.575297  | Gsap      |
| ENSMUSG00000000402  | 0.099199822  | -3.333518658 | 2.74E-06 | 1.74E-05 | 50.2100501 | 34.3827928 | 129.200548 | 12.31445468 | 3.830179066 | 4.946033976 | Egfl6     |
| ENSMUSG00000049307  | 0.26537968   | -1.913933861 | 2.77E-06 | 1.75E-05 | 52.8998742 | 51.0830064 | 55.9040832 | 14.20898617 | 16.27826103 | 11.87048154 | Fut4      |
| ENSMUSG00000056612  | 0.423633242  | -1.239112293 | 2.78E-06 | 1.76E-05 | 1076.82625 | 1729.94566 | 2212.55938 | 673.5059443 | 817.7432305 | 634.0815557 | Ppp1r14b  |
| ENSMUSG00000090799  | 0.136263399  | -2.875529997 | 2.87E-06 | 1.81E-05 | 71.728643  | 223.979336 | 64.6002739 | 10.41992319 | 25.85370869 | 12.85968834 | Klh33     |
| ENSMUSG00000042258  | 27.84473882  | 4.799332855  | 2.87E-06 | 1.81E-05 | 1.79321607 | 0          | 1.24231296 | 26.52344084 | 23.93861916 | 34.6223783  | Isl1      |
| ENSMUSG00000029616  | 0.496039096  | -1.011474261 | 2.92E-06 | 1.84E-05 | 1791.42286 | 2476.54344 | 3134.3556  | 1098.828264 | 1293.642979 | 1278.055179 | Erp29     |
| ENSMUSG00000022371  | 0.478494975  | -1.063424319 | 2.94E-06 | 1.85E-05 | 14441.6657 | 7594.66774 | 10108.7005 | 5106.709628 | 4898.799025 | 5376.338932 | Col14a1   |
| ENSMUSG00000029851  | 0.4598379    | -1.120802718 | 3.00E-06 | 1.89E-05 | 358.643215 | 273.097611 | 245.977966 | 112.7246236 | 155.1222522 | 136.5105377 | Tcaf2     |
| ENSMUSG00000032855  | 2.76473165   | 1.467139457  | 3.00E-06 | 1.89E-05 | 6152.52435 | 3509.00959 | 2298.27897 | 11887.23783 | 11590.12185 | 9594.316706 | Pkd1      |
| ENSMUSG00000031881  | 17.74674702  | 4.149482697  | 3.03E-06 | 1.91E-05 | 2.68982411 | 0          | 2.48462592 | 32.20703531 | 22.02352963 | 36.60065142 | Cdh16     |
| ENSMUSG00000020638  | 0.303332028  | -1.721030259 | 3.07E-06 | 1.93E-05 | 306.639949 | 818.310468 | 694.452944 | 143.9843932 | 236.5135573 | 171.1327756 | Cmpk2     |
| ENSMUSG00000029348  | 0.270946971  | -1.883917576 | 3.08E-06 | 1.93E-05 | 52.0032661 | 51.0830064 | 68.3272128 | 15.15625191 | 16.27826103 | 14.83810193 | Asphd2    |
| ENSMUSG00000019936  | 0.058825828  | -4.087406466 | 3.09E-06 | 1.94E-05 | 45.7270099 | 24.5591377 | 27.3308851 | 3.789062978 | 1.915089533 | 0           | Epyc      |
| ENSMUSG00000039304  | 0.410684356  | -1.283988104 | 3.20E-06 | 2.01E-05 | 767.49648  | 918.51175  | 503.136748 | 267.1289399 | 249.919184  | 382.8230297 | Tnfrf10   |
| ENSMUSG00000050761  | 4.404925644  | 2.139117666  | 3.28E-06 | 2.06E-05 | 85.1777635 | 110.024937 | 201.254699 | 431.0059137 | 991.0588333 | 319.5137948 | Gp1bb     |
| ENSMUSG00000042751  | 0.435505519  | -1.199237092 | 3.32E-06 | 2.08E-05 | 215.185929 | 181.737619 | 298.15511  | 101.3574347 | 95.75447664 | 104.8559203 | Nmnat2    |
| ENSMUSG00000020793  | 0.251085192  | -1.993751146 | 3.32E-06 | 2.08E-05 | 63.6591706 | 74.6597786 | 77.0234035 | 11.36718893 | 26.81125346 | 15.82730872 | Galr2     |
| ENSMUSG00000004609  | 0.422280733  | -1.24372567  | 3.40E-06 | 2.13E-05 | 457.270099 | 428.311361 | 346.605316 | 234.9219046 | 157.9948865 | 127.6076766 | Cd33      |
| ENSMUSG00000073198  | 4.939572859  | 2.304386293  | 3.41E-06 | 2.13E-05 | 16.1389447 | 11.7883861 | 11.1808166 | 37.89062978 | 77.56112608 | 79.13654361 | Bnip3l-ps |
| ENSMUSG00000029875  | 0.117430375  | -3.090122464 | 3.47E-06 | 2.17E-05 | 28.6914572 | 34.3827928 | 27.3308851 | 2.841797233 | 4.946033976 | Ccdc184     |           |
| ENSMUSG00000021194  | 0.137636154  | -2.861068607 | 3.53E-06 | 2.21E-05 | 32.2778893 | 38.3122548 | 55.9040832 | 3.789062978 | 9.575447664 | 3.956827181 | Chga      |
| ENSMUSG00000024056  | 0.283079878  | -1.820718891 | 3.60E-06 | 2.25E-05 | 77.1082912 | 90.3776267 | 57.1463961 | 16.10351766 | 22.02352963 | 25.71937667 | Ndc80     |
| ENSMUSG00000036502  | 0.32727428   | -1.611427867 | 3.65E-06 | 2.28E-05 | 70.8320349 | 65.818489  | 63.3579609 | 21.78711212 | 23.93861916 | 19.7841359  | Tmem255a  |
| ENSMUSG00000073643  | 2.042804418  | 1.030551084  | 3.70E-06 | 2.30E-05 | 994.338313 | 887.076053 | 1433.62915 | 1830.117418 | 2482.913579 | 2454.222059 | Wdfy1     |
| ENSMUSG00000030413  | 0.359792488  | -1.474763031 | 3.70E-06 | 2.30E-05 | 112.076005 | 180.755253 | 114.292792 | 43.57422425 | 54.58005169 | 48.47113296 | Pglyrp1   |
| ENSMUSG00000001986  | 0.47857058   | -1.063196385 | 3.76E-06 | 2.34E-05 | 586.381656 | 433.223189 | 390.086269 | 207.451198  | 200.1268562 | 268.0750415 | Gria3     |
| ENSMUSG00000021765  | 0.470117929  | -1.088905394 | 3.82E-06 | 2.37E-05 | 818.603138 | 847.781433 | 1226.16289 | 346.6992625 | 497.9232786 | 514.3875335 | Fst       |
| ENSMUSG00000027217  | 0.465872208  | -1.101993827 | 3.84E-06 | 2.39E-05 | 667.07638  | 419.470072 | 437.294162 | 206.5039323 | 247.0465497 | 257.1937667 | Tspan18   |
| ENSMUSG00000035681  | 0.3023343619 | -1.725738966 | 3.85E-06 | 2.40E-05 | 135.387814 | 101.183647 | 68.3272128 | 29.36523808 | 33.51462085 | 29.67620385 | Kcnc2     |
| ENSMUSG000000109455 | 4.184549418  | 2.065072285  | 3.98E-06 | 2.47E-05 | 37.6575376 | 31.4356962 | 9.93850367 | 113.6718893 | 104.3723795 | 117.7156086 | Gm44710   |
| ENSMUSG00000048922  | 0.31782256   | -1.653706558 | 4.01E-06 | 2.49E-05 | 71.728643  | 94.3070887 | 98.1427338 | 25.5761751  | 36.38670112 | 21.76254949 | Cdca2     |
| ENSMUSG00000086058  | 0.375389183  | -1.413541018 | 4.02E-06 | 2.49E-05 | 91.4540198 | 92.3423577 | 90.688846  | 34.1015668  | 41.17442296 | 29.69779026 | Unc45bos  |
| ENSMUSG00000005540  | 25.58292424  | 4.677109275  | 4.09E-06 | 2.53E-05 | 3.58643215 | 2.94709652 | 1.24231296 | 158.1933793 | 13.40562673 | 31.65461744 | Fcer1a2   |
| ENSMUSG00000031891  | 0.120315277  | -3.055108257 | 4.11E-06 | 2.54E-05 | 40.3473617 | 24.5591377 | 47.2078925 | 5.683594467 | 5.745268599 | 1.97841359  | Hsd11b2   |
| ENSMUSG00000094808  | 0.010846442  | -6.526634305 | 4.12E-06 | 2.55E-05 | 18.8278688 | 57.9595649 | 18.6346944 | 0.947265744 | 0           | 0           | Ighv1-64  |
| ENSMUSG00000031495  | 0.228785865  | -2.127930176 | 4.13E-06 | 2.56E-05 | 47.520226  | 54.0301029 | 75.7810905 | 14.20898617 | 17.2358058  | 8.902861156 | Cd209d    |
| ENSMUSG00000028399  | 2.227154854  | 1.155201872  | 4.20E-06 | 2.60E-05 | 1031.09924 | 675.867469 | 1362.81732 | 2575.615559 | 2109.47712  | 2147.567952 | Ptpnd     |
| ENSMUSG00000097336  | 6.289629716  | 2.652975085  | 4.21E-06 | 2.60E-05 | 6.27625626 | 4.91182754 | 6.2115648  | 32.20703531 | 31.59897729 | 45.50351258 | Fendrr    |
| ENSMUSG00000081344  | 3.609152333  | 1.851660037  | 4.24E-06 | 2.62E-05 | 31.3812813 | 43.2240823 | 36.0270758 | 74.83399381 | 152.2496179 | 172.1219824 | Gm14303   |
| ENSMUSG00000054342  | 0.417098421  | -1.261540243 | 4.32E-06 | 2.66E-05 | 288.707788 | 566.824498 | 495.682871 | 195.1367434 | 179.0608713 | 188.9384979 | Kcnn4     |
| ENSMUSG00000031595  | 0.481027455  | -1.055808856 | 4.36E-06 | 2.69E-05 | 2116.89158 | 1189.64463 | 1709.42263 | 702.8711824 | 809.1253276 | 901.1673904 | Pdgfrl    |
| ENSMUSG00000042357  | 0.15040008   | -2.733122764 | 4.37E-06 | 2.69E-05 | 32.2778893 | 53.0477374 | 63.3579609 | 3.789062978 | 6.708213365 | 11.87048154 | Gjb5      |
| ENSMUSG00000022385  | 0.276598421  | -1.854135172 | 4.37E-06 | 2.69E-05 | 58.2795224 | 81.5363371 | 58.3887091 | 18.94531489 | 22.02352963 | 13.84889513 | Gtse1     |
| ENSMUSG00000037646  | 2.752588908  | 1.460789163  | 4.39E-06 | 2.70E-05 | 1013.16708 | 629.69629  | 409.963277 | 1461.631044 | 1936.155518 | 2258.359113 | Vps13b    |
| ENSMUSG00000049401  | 0.480061947  | -1.058707511 | 4.43E-06 | 2.72E-05 | 1096.55163 | 1666.0919  | 1982.73148 | 682.9786018 | 765.0782684 | 828.9552943 | Ogfr      |
| ENSMUSG00000029602  | 0.225551218  | -2.148473016 | 4.45E-06 | 2.73E-05 | 52.8998742 | 44.2064478 | 52.1771443 | 14.20898617 | 12.44808196 | 6.924447566 | Rasal1    |
| ENSMUSG000000051401 | 19.01153752  | 4.248803307  | 4.48E-06 | 2.75E-05 | 3.58643215 | 0.98236551 | 0          | 29.36523808 | 22.02352963 | 42.53589219 | Kctd16    |
| ENSMUSG00000020826  | 0.251929534  | -1.988907832 | 4.49E-06 | 2.76E-05 | 74.4184671 | 51.0830064 | 69.5695527 | 13.26172042 | 92.98107439 | 12.85968834 | Nos2      |
| ENSMUSG00000029752  | 0.394096052  | -1.3433808   | 4.54E-06 | 2.78E-05 | 311.122989 | 227.908798 | 223.616333 | 107.9882949 | 124.4808196 | 68.25526886 | Asns      |
| ENSMUSG000000027420 | 0.380813619  | -1.392843022 | 4.63E-06 | 2.84E-05 | 103.109924 | 78.5892406 | 99.3850367 | 38.83789552 | 33.51406683 | 34.62223783 | Bfsp1     |
| ENSMUSG00000041695  | 0.345927141  | -1.531459885 | 4.67E-06 | 2.86E-05 | 139.870854 | 257.379763 | 115.350616 | 61.57227339 | 81.4058748  | 54.40637373 | Kcnj2     |
| ENSMUSG00000068452  | 0.382950109  | -1.384771647 | 4.68E-06 | 2.86E-05 | 130.904773 | 109.042571 | 91.931159  | 35.99609829 | 43.08951449 | 48.47113296 | Duox2     |
| ENSMUSG00000026459  | 0.053800156  | -4.216245829 | 4.69E-06 | 2.87E-05 | 19.7253768 | 116.901495 | 130.442861 | 5.683594467 | 8.617902898 | 0           | Myog      |
| ENSMUSG00000035042  | 0.25079507   | -1.995419105 | 4.69E-06 | 2.87E-05 | 101.316708 | 252.467935 | 161.500685 | 30.31250382 | 61.28286505 | 37.58985821 | Ccl5      |
| ENSMUSG00000020897  | 0.254584939  | -1.973781022 | 4.69E-06 | 2.87E-05 | 64.5557787 | 112.972033 | 91.931159  | 14.20898617 | 31.59897729 | 22.75175629 | Aurkb     |
| ENSMUSG00000083567  | 2.291316019  | 1.19617645   | 4.72E-06 | 2.88E-05 | 50.2100501 | 66.8008545 | 60.873335  | 128.8281412 | 153.2071626 | 124.6400562 | Gm11451   |
| ENSMUSG00000025804  | 0.340522576  | -1.554177647 | 4.79E-06 | 2.92E-05 | 135.387814 | 235.767722 | 265.854973 | 91.88477721 | 63.19795459 | 61.3308213  | Ccr1      |
| ENSMUSG000000202018 | 0.495655031  | -1.012591722 | 4.84E-06 | 2.95E-05 | 588.174872 | 495.112216 | 780.172538 | 278.4961289 | 355.2491084 | 288.8483842 | Rgcc      |
| ENSMUSG00000019796  | 0.10299753   | -1.285249808 | 4.90E-06 | 2.99E-05 | 96.833668  | 90.3776267 | 109.32354  | 42.6269585  | 41.17442496 | 37.58985821 | Lrp11     |
| EN                  |              |              |          |          |            |            |            |             |             |             |           |

|                      |             |              |          |          |            |            |            |             |             |             |               |
|----------------------|-------------|--------------|----------|----------|------------|------------|------------|-------------|-------------|-------------|---------------|
| ENSMUSG00000024798   | 0.196135435 | -2.350077891 | 5.93E-06 | 3.57E-05 | 45.7270099 | 39.2946203 | 53.4194572 | 6.630860211 | 6.702813365 | 13.84889513 | Htr7          |
| ENSMUSG00000009250   | 75.73709987 | 6.242928273  | 5.99E-06 | 3.60E-05 | 0          | 0          | 1.24231296 | 17.0507834  | 43.08951449 | 23.74096308 | Rn7s2         |
| ENSMUSG000000093672  | 3.021708327 | 1.59536441   | 6.06E-06 | 3.64E-05 | 40.3473617 | 36.3475238 | 19.8770073 | 99.46290317 | 89.05166328 | 106.8343339 | Gm20655       |
| ENSMUSG000000030187  | 0.232135658 | -2.106959944 | 6.13E-06 | 3.68E-05 | 60.9693465 | 181.737619 | 106.838914 | 25.5761751  | 24.89616393 | 30.66541065 | Klra2         |
| ENSMUSG000000051457  | 0.360318841 | -1.472654002 | 6.14E-06 | 3.69E-05 | 250.153642 | 406.69932  | 305.608988 | 165.7715053 | 95.75447664 | 85.07178438 | Spn           |
| ENSMUSG000000038745  | 43.5520766  | 5.444669604  | 6.15E-06 | 3.69E-05 | 0          | 0.98236551 | 1.24231296 | 39.78516127 | 32.55652206 | 17.80572231 | Nlrrp6        |
| ENSMUSG000000069910  | 0.226812833 | -2.140425823 | 6.18E-06 | 3.70E-05 | 41.2439697 | 49.6925184 | 5.8253917  | 15.32071626 | 9.892067951 | 9.92067951  | Spdl1         |
| ENSMUSG00000046080   | 0.433148189 | -1.207067408 | 6.23E-06 | 3.73E-05 | 131.801381 | 165.037405 | 114.292792 | 60.62500765 | 56.49514122 | 61.3308213  | Clec9a        |
| ENSMUSG00000047497   | 0.156047596 | -2.679941964 | 6.39E-06 | 3.82E-05 | 959.3706   | 375.263624 | 114.292792 | 64.41407062 | 69.90076795 | 91.99623195 | Adams12       |
| ENSMUSG000000097915  | 0.355180419 | -1.493376046 | 6.42E-06 | 3.84E-05 | 68.1422108 | 91.3599922 | 99.3850367 | 30.31250382 | 28.72634299 | 32.64382429 | A330009N23Rik |
| ENSMUSG000000054793  | 0.422306835 | -1.243636497 | 6.43E-06 | 3.84E-05 | 359.539823 | 330.074811 | 295.670484 | 104.1992319 | 193.4240428 | 118.7048154 | Cadm4         |
| ENSMUSG000000081214  | 5.510329372 | 2.462138556  | 6.45E-06 | 3.85E-05 | 7.1728643  | 29.4709652 | 23.6039462 | 70.09766509 | 107.2450138 | 152.3378465 | Rpl35a-ps2    |
| ENSMUSG000000053702  | 2.303598262 | 1.203889138  | 6.49E-06 | 3.87E-05 | 97.730276  | 111.007302 | 62.115648  | 224.5019814 | 197.2542219 | 205.7550134 | Nebl          |
| ENSMUSG000000041528  | 2.349397464 | 1.232290805  | 6.60E-06 | 3.94E-05 | 720.872862 | 878.234764 | 390.086269 | 1564.88301  | 1573.246051 | 1540.19498  | Rnf123        |
| ENSMUSG000000003974  | 11.51167087 | 3.525025345  | 6.63E-06 | 3.96E-05 | 2.68982411 | 0.98236551 | 3.72693888 | 22.73437787 | 27.76879823 | 32.64382424 | Grm3          |
| ENSMUSG0000000053475 | 0.320779166 | -1.640347648 | 6.96E-06 | 4.14E-05 | 214.289321 | 201.384929 | 380.147766 | 56.83594467 | 113.9478272 | 84.08257759 | Tnfaip6       |
| ENSMUSG000000027861  | 0.378732441 | -1.400749092 | 7.01E-06 | 4.16E-05 | 182.011432 | 271.13288  | 362.755384 | 89.99024572 | 93.3938711  | 124.6400562 | Casq2         |
| ENSMUSG000000037625  | 0.441703551 | -1.178849665 | 7.11E-06 | 4.22E-05 | 104.006532 | 106.095475 | 101.869663 | 49.25781871 | 44.04705926 | 44.51430578 | Cldn11        |
| ENSMUSG000000045730  | 0.496614767 | -1.009800933 | 7.34E-06 | 4.35E-05 | 186.494472 | 233.802991 | 247.220279 | 118.4082181 | 94.79693188 | 117.7156086 | Adrb2         |
| ENSMUSG000000032878  | 2.692741013 | 1.429705479  | 7.35E-06 | 4.36E-05 | 71.728643  | 39.2946203 | 55.9040832 | 122.197281  | 153.1225252 | 173.1111891 | Ccd85a        |
| ENSMUSG000000079343  | 0.224959027 | -2.152265837 | 7.61E-06 | 4.51E-05 | 60.9693465 | 40.2769858 | 48.4502054 | 9.472657445 | 15.32071626 | 8.902861156 | C1s2          |
| ENSMUSG000000022262  | 69.57341952 | 6.120464325  | 7.74E-06 | 4.58E-05 | 0          | 0          | 1.24231296 | 35.04883255 | 16.27826103 | 25.71937667 | Dnah5         |
| ENSMUSG000000047787  | 3.187179161 | 1.232290805  | 7.86E-06 | 4.64E-05 | 26.0016331 | 26.5238687 | 22.3616333 | 104.1992319 | 69.90076795 | 65.28764848 | Rnf123        |
| ENSMUSG000000026198  | 3.273855206 | 1.710990517  | 7.92E-06 | 4.68E-05 | 70.8320349 | 83.5010681 | 48.4502054 | 125.986344  | 295.8813328 | 244.3340784 | Abcb6         |
| ENSMUSG000000021303  | 0.226357364 | -2.143325851 | 7.97E-06 | 4.71E-05 | 54.6930903 | 56.9771994 | 94.4157849 | 9.472657445 | 15.32071626 | 21.76254949 | Gng4          |
| ENSMUSG000000045502  | 2.379023062 | -2.071560473 | 8.00E-06 | 4.72E-05 | 86.9709796 | 319.26879  | 201.254699 | 55.88867892 | 45.00460402 | 43.52509899 | Hcar2         |
| ENSMUSG000000018849  | 2.003366594 | 1.002426442  | 8.19E-06 | 4.83E-05 | 124.628517 | 111.989668 | 118.019731 | 287.0215206 | 202.9994095 | 220.5931153 | Wwc1          |
| ENSMUSG000000069874  | 0.369175068 | -1.437622971 | 8.21E-06 | 4.83E-05 | 921.713062 | 2100.29746 | 1401.32902 | 441.4258369 | 459.6214879 | 732.0130284 | Irgm2         |
| ENSMUSG000000020654  | 2.268358444 | 1.181648632  | 8.35E-06 | 4.92E-05 | 89.039368  | 228.891163 | 229.827897 | 764.4434558 | 579.3145837 | 603.416145  | Adcy3         |
| ENSMUSG000000053164  | 2.470100153 | 1.304569539  | 8.41E-06 | 4.95E-05 | 86.9709796 | 70.7303165 | 47.2078925 | 190.4004146 | 150.3345283 | 169.154362  | Gpr21         |
| ENSMUSG000000044285  | 2.476955325 | 1.308567848  | 8.67E-06 | 5.09E-05 | 120.145477 | 122.795688 | 88.2042201 | 185.6640859 | 333.2255787 | 303.6864861 | Gm1821        |
| ENSMUSG000000024972  | 0.353638265 | -1.499653708 | 8.71E-06 | 5.11E-05 | 814.120098 | 375.263624 | 592.583282 | 227.3437787 | 262.367266  | 140.4673649 | Lgals12       |
| ENSMUSG000000037860  | 0.436095701 | -1.197283328 | 8.77E-06 | 5.14E-05 | 157.803015 | 258.362128 | 193.800822 | 89.04297998 | 96.71202141 | 80.12575041 | Aim2          |
| ENSMUSG000000104476  | 0.259740477 | -1.944857238 | 8.86E-06 | 5.19E-05 | 257.326507 | 491.182754 | 1032.36207 | 134.5117357 | 174.2731475 | 153.3270532 | Gm38211       |
| ENSMUSG000000021485  | 0.207817499 | -2.266610954 | 9.01E-06 | 5.26E-05 | 54.6930903 | 65.818489  | 64.6002739 | 11.36718893 | 21.06598486 | 5.935240771 | Mxd3          |
| ENSMUSG000000104763  | 47.09376091 | 5.557464036  | 9.04E-06 | 5.28E-05 | 0          | 1.96473102 | 0          | 16.10351766 | 45.00460402 | 34.62223783 | 9830132P13Rik |
| ENSMUSG000000038600  | 0.102095488 | -3.292008991 | 9.11E-06 | 5.32E-05 | 108.489572 | 47.1553444 | 22.3616333 | 7.578125956 | 7.660358132 | 2.967620385 | Atp6v0a4      |
| ENSMUSG000000086810  | 4.171643618 | 2.060615914  | 9.17E-06 | 5.35E-05 | 14.3457286 | 11.7883861 | 9.93850367 | 38.83789552 | 51.7074139  | 61.3308213  | Gm13110       |
| ENSMUSG000000038473  | 2.312457815 | 1.209427048  | 9.22E-06 | 5.38E-05 | 86.0743716 | 71.7126821 | 49.6925184 | 155.3515821 | 157.9948865 | 170.1435688 | Nos1ap        |
| ENSMUSG000000054580  | 0.459427669 | -1.122090348 | 9.23E-06 | 5.38E-05 | 540.654646 | 363.475238 | 310.57824  | 173.3496312 | 181.9335056 | 203.7765998 | Pla2r1        |
| ENSMUSG000000004446  | 0.461217497 | -1.116476282 | 9.28E-06 | 5.40E-05 | 201.736808 | 232.820625 | 232.312523 | 87.14844849 | 133.0987225 | 87.05077225 | Km13110       |
| ENSMUSG000000024401  | 0.142307042 | -2.81292104  | 9.27E-06 | 5.40E-05 | 34.9677134 | 123.778054 | 44.7232665 | 9.472657445 | 7.660358132 | 11.87048154 | Tnf           |
| ENSMUSG000000056130  | 0.254560761 | -1.97391804  | 9.51E-06 | 5.53E-05 | 58.2795224 | 53.0477734 | 39.7540147 | 13.26172042 | 10.53299243 | 14.83810193 | Ticam2        |
| ENSMUSG000000047976  | 0.408103321 | -1.292993645 | 9.62E-06 | 5.59E-05 | 130.08165  | 118.866226 | 127.958235 | 41.67969276 | 45.00460402 | 67.26606207 | Kcna1         |
| ENSMUSG000000111761  | 2.915410902 | 1.543699233  | 9.69E-06 | 5.63E-05 | 78.0048992 | 35.3651583 | 60.873335  | 141.1425959 | 163.7401551 | 203.7765998 | 9230112J17Rik |
| ENSMUSG000000079620  | 0.410563255 | 5.360562073  | 9.73E-06 | 5.65E-05 | 0.89660804 | 0.98236551 | 0          | 35.04883255 | 17.2358058  | 30.66541065 | Muc4          |
| ENSMUSG000000090200  | 0.112118104 | -3.156908847 | 9.81E-06 | 5.69E-05 | 21.1859299 | 9.6245096  | 151.562181 | 10.41992319 | 10.53299243 | 6.924447566 | 1700025N21Rik |
| ENSMUSG000000021301  | 0.025745897 | -5.279513675 | 9.88E-06 | 5.73E-05 | 20.6219849 | 24.5591377 | 29.815511  | 0.947265744 | 0.957544766 | 0           | Hecw1         |
| ENSMUSG000000070858  | 0.296426307 | -1.754254608 | 1.02E-05 | 5.94E-05 | 58.2795224 | 70.7303165 | 96.9004108 | 17.99804914 | 21.06598486 | 27.69779026 | Gm1673        |
| ENSMUSG000000047959  | 9.935159803 | 3.312543173  | 1.03E-05 | 5.94E-05 | 14.3457286 | 3.92946203 | 2.48462592 | 120.3027495 | 55.53759645 | 35.61144462 | Kcna3         |
| ENSMUSG000000022033  | 0.303102241 | -1.722123575 | 1.03E-05 | 5.98E-05 | 64.5557787 | 88.4128957 | 73.2964646 | 15.15625191 | 28.72634299 | 24.73016988 | Pbk           |
| ENSMUSG000000052942  | 0.40420223  | -1.306850813 | 1.03E-05 | 5.99E-05 | 231.324874 | 129.672247 | 165.227624 | 74.83399381 | 70.85831272 | 67.26606207 | Glis3         |
| ENSMUSG000000094344  | 10.3031135  | 3.365008466  | 1.04E-05 | 6.03E-05 | 4.48304019 | 2.94709652 | 12.4231296 | 21.78711212 | 75.64603655 | 11.8882999  | Gm11942       |
| ENSMUSG000000106807  | 0.10984148  | -3.186505122 | 1.05E-05 | 6.05E-05 | 42.1405777 | 109.042571 | 29.950809  | 3.789062978 | 23.93861916 | 11.87048154 | Gm10441       |
| ENSMUSG000000023919  | 2.639036183 | 1.400011131  | 1.06E-05 | 6.11E-05 | 71.728643  | 87.4305302 | 47.2078925 | 155.3515821 | 229.8107439 | 162.2299144 | Cenpq         |
| ENSMUSG000000095788  | 0.170451495 | -2.552566841 | 1.07E-05 | 6.16E-05 | 65.4523867 | 137.531171 | 55.9040832 | 13.26172042 | 23.93861916 | 6.924447566 | Sirpb1a       |
| ENSMUSG000000068240  | 3.325060820 | 1.733366839  | 1.08E-05 | 6.21E-05 | 36.7609295 | 33.4004273 | 40.9963277 | 70.09766509 | 145.5468045 | 153.3270532 | Gm11808       |
| ENSMUSG000000020914  | 0.369419336 | -1.436668715 | 1.08E-05 | 6.23E-05 | 568.449495 | 698.461876 | 664.637433 | 124.0918125 | 269.0700794 | 320.5030016 | Top2a         |
| ENSMUSG000000041064  | 0.165913891 | -2.591493418 | 1.09E-05 | 6.26E-05 | 35.8643215 | 46.1711789 | 64.6002739 | 4.736328722 | 5.745268599 | 13.84889513 | Pif1          |
| ENSMUSG000000027398  | 0.238059798 | -2.070604088 | 1.09E-05 | 6.29E-05 | 225.048617 | 785.892406 | 378.905453 | 151.5625191 | 194.1905372 | 64.29844168 | Il1b          |
| ENSMUSG000000087658  | 2.038696846 | 1.027647262  | 1.12E-05 | 6.43E-05 | 125.525125 | 145.390095 | 165.227624 | 236.8164361 | 353.3340188 | 296.7620385 | Hotairm1      |
| ENSMUSG000000020598  | 0.234126496 | -2.094639879 | 1.14E-05 | 6.53E-05 | 46.6236179 | 55.9948339 | 37.2693888 | 10.41992319 | 8.617902898 | 13.84889513 | Nrcam         |
| ENSMUSG000000044534  | 0.426014911 | -1.231024168 | 1.17E-05 | 6.69E-05 | 160.492839 | 113.954399 | 172.681501 | 60.62500765 | 57.45268599 | 72.21209604 | Ackr2         |
| ENSMUSG000000031443  | 0.130847952 | -2.934036756 | 1.18E-05 | 6.75E-05 | 75.3150751 | 151.284288 | 101.869663 | 25.5761751  | 15.32071626 | 1.97841359  | F7            |
| ENSMUSG000000079445  | 0.109339357 | -3.193115296 | 1.18E-05 | 6.76E-05 | 18.8287688 | 31.4356962 | 47.2078925 | 4.736328722 | 2.872634299 | 2.967620385 | B3gnt7        |
| ENSMUSG000000063130  | 0.101450039 | -3.301158674 | 1.20E-05 | 6.85E-05 | 39.4507536 | 19.6473102 | 26.0885721 | 3.789062978 | 2.872634299 | 1.97841359  | Calml3        |
| ENSMUSG000000045733  | 0.436813276 | -1.19491139  | 1.20E-05 | 6.86E-05 | 354.160175 | 237.732453 | 217.404768 | 135.4590015 | 120.6506406 | 97.93147272 | Sprrn         |
| ENSMUSG000000032502  | 2.216794    |              |          |          |            |            |            |             |             |             |               |

|                     |             |              |          |            |            |            |            |             |             |             |               |
|---------------------|-------------|--------------|----------|------------|------------|------------|------------|-------------|-------------|-------------|---------------|
| ENSMUSG00000068101  | 0.177494758 | -2.494151676 | 1.28E-05 | 7.24E-05   | 33.1744974 | 50.1006409 | 63.3579609 | 11.36718893 | 10.53299243 | 3.956827181 | Cenpm         |
| ENSMUSG00000040938  | 2.186404643 | 1.128560428  | 1.28E-05 | 7.25E-05   | 112.972613 | 113.954399 | 166.469937 | 232.0801074 | 283.4332509 | 341.2763443 | Slc16a11      |
| ENSMUSG00000025128  | 0.115579106 | -3.113047478 | 1.32E-05 | 7.51E-05   | 39.4507536 | 18.6649446 | 33.5424499 | 4.736328722 | 2.876764299 | 2.967620385 | Bhlhe22       |
| ENSMUSG00000006434  | 2.989116962 | 1.57971935   | 1.33E-05 | 7.56E-05   | 23.311809  | 30.4533307 | 32.3001369 | 88.09571424 | 103.4148348 | 64.29844168 | mt-Tm         |
| ENSMUSG000000086507 | 0.143675957 | -2.799109441 | 1.37E-05 | 7.72E-05   | 21.5185929 | 34.3827928 | 38.5117017 | 4.736328722 | 3.830179066 | 4.946033976 | Adap2os       |
| ENSMUSG000000040875 | 3.077796817 | 1.621897994  | 1.39E-05 | 7.84E-05   | 55.5896983 | 41.2593133 | 22.3616333 | 107.9882949 | 122.5657301 | 140.4673649 | Osbpl10       |
| ENSMUSG000000068794 | 0.320530262 | -1.641467525 | 1.40E-05 | 7.90E-05   | 32.6365325 | 167.002136 | 145.350616 | 63.46680488 | 84.26339945 | 57.37399412 | Col28a1       |
| ENSMUSG000000068606 | 0.14765603  | -2.759687822 | 1.43E-05 | 8.05E-05   | 83.3845474 | 411.611148 | 218.647081 | 12.31445468 | 57.45268599 | 35.61144462 | Gm4841        |
| ENSMUSG000000041605 | 0.025061245 | -5.318398103 | 1.43E-05 | 8.06E-05   | 30.4846733 | 27.5062342 | 18.6346944 | 0           | 1.915089533 | 0           | 5730559C18Rik |
| ENSMUSG000000030353 | 0.4508862   | -1.149164741 | 1.44E-05 | 8.10E-05   | 121.042085 | 156.196116 | 137.896738 | 53.99414743 | 73.73094702 | 59.35240771 | Tead4         |
| ENSMUSG000000087626 | 3.918420235 | 1.970272129  | 1.45E-05 | 8.13E-05   | 45.7270099 | 35.3651583 | 13.6654426 | 106.0937634 | 163.7401551 | 105.8451271 | Gm15050       |
| ENSMUSG00000007033  | 2.507182684 | 1.326067121  | 1.47E-05 | 8.24E-05   | 34.9677134 | 53.0477734 | 34.7847629 | 99.46290317 | 104.3723795 | 104.8559203 | Hspa1c        |
| ENSMUSG000000017417 | 0.293623793 | -1.767959217 | 1.47E-05 | 8.24E-05   | 74.4184671 | 81.5363371 | 136.654426 | 33.15430106 | 32.55652206 | 19.7841359  | Plxdc1        |
| ENSMUSG000000028270 | 0.423900689 | -1.238201784 | 1.47E-05 | 8.25E-05   | 1470.43718 | 2950.04362 | 1617.49147 | 748.3399381 | 769.8659922 | 1041.634755 | Gbp2          |
| ENSMUSG000000000567 | 0.287607379 | -1.797827403 | 1.49E-05 | 8.33E-05   | 138.077638 | 187.631812 | 330.455247 | 66.30860211 | 82.34884891 | 39.56827181 | Sox9          |
| ENSMUSG000000020000 | 0.355623055 | -1.491579239 | 1.50E-05 | 8.42E-05   | 89.6608037 | 68.7655855 | 65.8425868 | 29.36523808 | 25.85370869 | 24.73016988 | Moxd1         |
| ENSMUSG000000040026 | 0.032140253 | -4.959474904 | 1.51E-05 | 8.45E-05   | 427.682034 | 1732.89276 | 2598.91871 | 42.6269585  | 104.3723795 | 5.935240771 | Saa3          |
| ENSMUSG000000104524 | 0.204228733 | -2.291742242 | 1.52E-05 | 8.52E-05   | 67.2456028 | 164.05504  | 268.339599 | 37.89062978 | 43.08951449 | 20.7733427  | Gm37333       |
| ENSMUSG000000040838 | 14.70188097 | 3.877928842  | 1.53E-05 | 8.53E-05   | 4.48304019 | 0.98236551 | 0          | 32.20703531 | 31.59897729 | 22.75175629 | Gm11639       |
| ENSMUSG000000037185 | 2.331773433 | 1.221427616  | 1.53E-05 | 8.55E-05   | 48.9015073 | 79.526212  | 54.6617702 | 198.9258063 | 143.631715  | 180.0356367 | Krt80         |
| ENSMUSG000000031284 | 0.440165478 | -1.183882096 | 1.55E-05 | 8.65E-05   | 260.016331 | 225.944067 | 383.874704 | 141.1425959 | 135.9713568 | 104.8559203 | Pak3          |
| ENSMUSG000000078202 | 0.43600602  | -1.197580041 | 1.56E-05 | 8.69E-05   | 168.562311 | 195.490736 | 139.139051 | 62.51953913 | 91.92429758 | 65.28764848 | Nrarp         |
| ENSMUSG000000073002 | 0.456681953 | -1.130738317 | 1.56E-05 | 8.72E-05   | 468.926003 | 795.716061 | 895.707644 | 295.5469123 | 367.6971903 | 322.4814152 | Vamp5         |
| ENSMUSG000000086825 | 0.365438062 | -1.45230119  | 1.58E-05 | 8.78E-05   | 251.05025  | 311.409866 | 219.889394 | 142.0898617 | 78.51867085 | 65.28764848 | Gm15675       |
| ENSMUSG000000020140 | 0.16849703  | -2.569204931 | 1.59E-05 | 8.86E-05   | 81.5913314 | 26.5238687 | 52.1771443 | 7.578125956 | 8.617902595 | 10.88127475 | Lgr5          |
| ENSMUSG000000102091 | 3.093323245 | 1.6291576    | 1.61E-05 | 8.95E-05   | 71.728643  | 40.2789858 | 31.057824  | 128.8281412 | 183.8488982 | 133.5429173 | Offr1034      |
| ENSMUSG000000085382 | 2.06521636  | 1.046292932  | 1.61E-05 | 8.96E-05   | 148.836934 | 146.372461 | 200.012386 | 360.9082486 | 263.3248108 | 395.6827181 | Gm13861       |
| ENSMUSG000000058603 | 3.732746774 | 1.900237641  | 1.62E-05 | 8.98E-05   | 12.5525125 | 18.6649446 | 23.6039462 | 54.94141318 | 58.41023075 | 89.02861156 | Hpl28-ps1     |
| ENSMUSG000000003665 | 0.227595194 | -2.235457999 | 1.65E-05 | 9.16E-05   | 11.179397  | 10.137044  | 160.258372 | 28.41797233 | 45.96214879 | 10.88127475 | Ras1          |
| ENSMUSG000000098132 | 0.45042597  | -1.150638085 | 1.66E-05 | 9.22E-05   | 208.909673 | 180.755253 | 156.531433 | 62.51953913 | 86.17902898 | 97.93147272 | Rassf10       |
| ENSMUSG000000007080 | 0.375281938 | -1.413953237 | 1.69E-05 | 9.38E-05   | 143.457286 | 123.778054 | 80.7503423 | 42.6269585  | 46.91969356 | 41.5466854  | Pole          |
| ENSMUSG000000097423 | 0.156439564 | -2.676322676 | 1.72E-05 | 9.51E-05   | 58.2795224 | 101.183647 | 258.401096 | 26.52344084 | 28.72634299 | 9.892067951 | Gm26522       |
| ENSMUSG000000069273 | 11.63988995 | 3.541005513  | 1.76E-05 | 9.72E-05   | 5.37964822 | 0.98236551 | 1.24231296 | 30.31250382 | 40.21688019 | 21.76254949 | Hist1h3e      |
| ENSMUSG00000009350  | 0.044233074 | -4.498730672 | 1.78E-05 | 9.80E-05   | 38.5541456 | 37.3298893 | 11.1808166 | 0           | 1.915089533 | 1.97841359  | Mpo           |
| ENSMUSG000000028755 | 0.328932509 | -1.604136495 | 1.78E-05 | 9.80E-05   | 67.2456028 | 117.883861 | 84.4772812 | 35.04883255 | 24.89616393 | 28.6869706  | Cda           |
| ENSMUSG000000099021 | 41.50774931 | 5.375308801  | 1.79E-05 | 9.87E-05   | 1.79321607 | 0          | 0          | 18.94531489 | 41.17442496 | 22.75175629 | Rn7s1         |
| ENSMUSG000000027379 | 0.277615502 | -1.848839962 | 1.81E-05 | 9.96E-05   | 84.2811555 | 86.4481647 | 86.9619071 | 11.36718893 | 33.51406683 | 26.70858347 | Bub1          |
| ENSMUSG000000056220 | 2.048717401 | 1.043440678  | 1.81E-05 | 9.96E-05   | 58.071448  | 428.311361 | 341.636064 | 1056.201305 | 97.6532065  | 753.775779  | Pla2g4a       |
| ENSMUSG000000028542 | 3.217150039 | 1.685783221  | 1.83E-05 | 0.00010096 | 293.190828 | 153.249019 | 81.9926553 | 577.8321041 | 537.182614  | 590.5564567 | Slc6a9        |
| ENSMUSG000000019194 | 0.473425917 | -1.078789408 | 1.86E-05 | 0.00010246 | 1835.35665 | 3529.63927 | 2164.10917 | 1161.347803 | 1333.85986  | 1069.332546 | Scd1          |
| ENSMUSG000000024791 | 0.196415454 | -2.348019646 | 1.87E-05 | 0.00010278 | 31.3812813 | 71.1726847 | 54.6617702 | 6.630860211 | 11.4905372  | 12.85968834 | Ccnb5         |
| ENSMUSG000000024530 | 3.127958439 | 1.645221344  | 1.90E-05 | 0.00010465 | 34.0711054 | 21.6120412 | 55.9040832 | 105.1464976 | 122.5657301 | 117.7156086 | Prelid3a      |
| ENSMUSG000000108478 | 0.161609039 | -2.629420199 | 1.93E-05 | 0.00010615 | 46.6236179 | 114.936764 | 244.735653 | 16.10351766 | 32.55652206 | 16.81651552 | Gm19514       |
| ENSMUSG000000069372 | 0.089165274 | -3.487374233 | 1.94E-05 | 0.00010639 | 25.105025  | 151.284288 | 38.5117017 | 10.41992319 | 5.745268599 | 2.967620385 | Ctnx3         |
| ENSMUSG000000028040 | 0.339602337 | -1.558081708 | 1.95E-05 | 0.00010695 | 84.2811555 | 58.9419305 | 95.6580979 | 26.52344084 | 30.64143253 | 23.74096308 | Efnaf4        |
| ENSMUSG000000031965 | 6.316102015 | 2.659034473  | 1.97E-05 | 0.00010787 | 12.5525125 | 29.4709652 | 4.96925184 | 45.46875573 | 49.79232786 | 36.60065142 | Tbx20         |
| ENSMUSG000000109783 | 0.092546803 | -4.333673032 | 2.00E-05 | 0.00010961 | 26.0016331 | 25.5415032 | 21.193203  | 1.894531489 | 3.830179066 | 0.989206795 | Gm45338       |
| ENSMUSG000000040907 | 0.265991239 | -1.910549365 | 2.02E-05 | 0.0001107  | 125.525125 | 311.409866 | 208.708577 | 87.14844849 | 49.79232786 | 34.62223783 | Atp1a3        |
| ENSMUSG000000050014 | 0.279286118 | -1.84018423  | 2.07E-05 | 0.00011278 | 63.6591706 | 159.143212 | 134.1698   | 25.5761751  | 35.42915636 | 53.97060501 | Apol10b       |
| ENSMUSG000000022629 | 0.429827885 | -1.218169016 | 2.09E-05 | 0.00011472 | 126.421733 | 187.631812 | 200.012386 | 82.41211977 | 76.60358132 | 61.3308213  | Fit2          |
| ENSMUSG000000041737 | 0.472527645 | -1.081529358 | 2.10E-05 | 0.00011429 | 130.84095  | 710.250262 | 1347.90956 | 520.0488937 | 563.0363227 | 508.4522927 | Tmem45b       |
| ENSMUSG000000019906 | 0.245597466 | -2.025632419 | 2.11E-05 | 0.00011493 | 84.2811555 | 60.9066615 | 69.5695257 | 28.41797233 | 14.3631175  | 9.892067951 | Lin7a         |
| ENSMUSG000000049109 | 4.465982655 | 2.158977648  | 2.11E-05 | 0.00011507 | 8.96608037 | 15.7178481 | 6.2115648  | 52.09961595 | 45.96214879 | 41.5466854  | Themis        |
| ENSMUSG000000035246 | 3.798131433 | 1.92528983   | 2.17E-05 | 0.00011788 | 12.5525125 | 19.6473102 | 16.1500685 | 46.41602182 | 82.34884991 | 54.40637373 | Pcyt1b        |
| ENSMUSG000000085972 | 68.903208   | 6.106499248  | 2.17E-05 | 0.00011811 | 0          | 0.98236551 | 0          | 10.41992319 | 41.17442496 | 24.73016988 | 1110028F11Rik |
| ENSMUSG000000048621 | 0.315951757 | -1.662223807 | 2.24E-05 | 0.00012134 | 54.6930903 | 69.747951  | 70.8118387 | 25.5761751  | 21.06598456 | 14.83810193 | Gm6377        |
| ENSMUSG000000040584 | 0.396552595 | -1.334515195 | 2.24E-05 | 0.00012174 | 596.244345 | 435.18792  | 258.401096 | 181.8750229 | 182.8910504 | 147.3918125 | Abcb1a        |
| ENSMUSG000000022456 | 0.186466444 | -2.423012062 | 2.26E-05 | 0.00012238 | 58.2795224 | 85.4657992 | 40.9963277 | 17.99804914 | 11.4905372  | 4.946033976 | 3-Sep         |
| ENSMUSG000000029780 | 2.196320241 | 1.135088426  | 2.28E-05 | 0.00012322 | 442.92437  | 668.008545 | 570.221648 | 869.5899534 | 1656.552446 | 1165.285605 | Nt5c3         |
| ENSMUSG000000103469 | 3.172170311 | 1.66547023   | 2.28E-05 | 0.00012341 | 68.1422108 | 50.1006409 | 33.5424499 | 107.9882949 | 154.1647074 | 222.5715289 | Gm9910        |
| ENSMUSG000000086096 | 0.238794138 | -2.066160671 | 2.30E-05 | 0.00012426 | 34.9677134 | 37.3298893 | 40.9963277 | 8.5253917   | 9.575447664 | 8.902861156 | Gm12688       |
| ENSMUSG000000062248 | 0.367165711 | -1.44549676  | 2.30E-05 | 0.00012436 | 83.3845474 | 148.337192 | 141.623677 | 53.04688169 | 42.13196972 | 41.5466854  | Cks2          |
| ENSMUSG000000021569 | 0.215889497 | -2.211635039 | 2.35E-05 | 0.00012702 | 35.8643215 | 54.0301029 | 75.7810905 | 11.36718893 | 16.27826103 | 7.913654361 | Trp13         |
| ENSMUSG000000026893 | 0.365041916 | -1.453865964 | 2.36E-05 | 0.00012726 | 74.4184671 | 65.818489  | 65.8425868 | 23.68164361 | 22.02352963 | 29.67620385 | Gca           |
| ENSMUSG000000090654 | 2.341170591 | 1.227230061  | 2.37E-05 | 0.00012805 | 5119.63189 | 3101.32791 | 2095.78196 | 8791.573374 | 7394.160686 | 7973.006769 | Syne1         |
| ENSMUSG000000042474 | 19.57464115 | 4.290913955  | 2.38E-05 | 0.0001282  | 3.58643215 | 2.94709652 | 3.72693888 | 159.1406451 | 8.617902898 | 32.64382424 | Fcmr          |
| ENSMUSG000000103364 | 0.234116466 | -2.094701689 | 2.38E-05 | 0.0001282  | 101.316708 | 163.072674 | 398.78246  | 57.78321041 | 55.53759645 | 41.5466854  |               |

|                     |             |              |          |            |            |            |            |             |             |             |               |
|---------------------|-------------|--------------|----------|------------|------------|------------|------------|-------------|-------------|-------------|---------------|
| ENSMUSG00000049871  | 0.436819505 | -1.194890816 | 2.72E-05 | 0.00014433 | 108.489572 | 128.689881 | 140.381364 | 58.73047616 | 63.19795459 | 42.53589219 | Nlrc3         |
| ENSMUSG00000033847  | 0.264340289 | -1.919531767 | 2.72E-05 | 0.00014452 | 46.6236179 | 68.7655855 | 40.9963277 | 13.26172042 | 16.27826103 | 11.87048154 | Pla2g4c       |
| ENSMUSG00000090124  | 0.158957063 | -2.653290971 | 2.73E-05 | 0.00014488 | 98.6268841 | 56.9771994 | 31.057824  | 9.472657445 | 15.32071626 | 4.946033976 | Ugt1a7c       |
| ENSMUSG00000034773  | 0.10912651  | -3.195926479 | 2.76E-05 | 0.00014608 | 19.7253768 | 22.5940667 | 28.5731981 | 2.841797233 | 2.872634299 | 1.97841359  | BC030867      |
| ENSMUSG00000003348  | 2.517084853 | 1.331753852  | 2.82E-05 | 0.00014939 | 205.32324  | 167.002136 | 88.2042201 | 394.0625497 | 446.2158612 | 323.470622  | Mob3a         |
| ENSMUSG000000074604 | 0.364781205 | -1.454896697 | 2.86E-05 | 0.00015121 | 78.0048992 | 60.9066615 | 94.4157849 | 27.47070659 | 29.68388776 | 27.69779026 | Mgst2         |
| ENSMUSG00000110018  | 0.093017209 | -3.426358544 | 2.86E-05 | 0.00015121 | 14.3457286 | 34.3827928 | 34.7847629 | 1.894531489 | 1.915089533 | 3.956827181 | 543043710Rik  |
| ENSMUSG00000097131  | 2.698933912 | 1.43238965   | 2.92E-05 | 0.00015426 | 61.8659546 | 49.1182754 | 31.057824  | 116.5136866 | 112.9902824 | 157.2838804 | D230017M19Rik |
| ENSMUSG00000051998  | 2.136205599 | 1.095050506  | 2.95E-05 | 0.0001559  | 80.6947233 | 100.201282 | 99.3850367 | 251.972688  | 172.358058  | 173.1111891 | Lax1          |
| ENSMUSG00000021676  | 0.366666777 | -1.447458542 | 2.99E-05 | 0.00015773 | 452.787059 | 347.75739  | 367.724636 | 215.9765897 | 131.183633  | 81.1149572  | Iqgap2        |
| ENSMUSG00000106706  | 0.183845266 | -2.443436064 | 3.00E-05 | 0.00015805 | 56.4863063 | 170.931598 | 319.274431 | 23.68164361 | 45.96214879 | 30.66541065 | C53004K16Rik  |
| ENSMUSG00000032596  | 0.493814414 | -1.017959146 | 3.01E-05 | 0.00015838 | 945.024871 | 1407.72977 | 900.676895 | 410.1660674 | 566.8665017 | 630.1247285 | Uba7          |
| ENSMUSG00000057719  | 15.04799858 | 3.911499713  | 3.01E-05 | 0.00015839 | 6.27625626 | 69.747951  | 13.6654426 | 387.4316895 | 436.6404135 | 527.2472218 | Sh3rf2        |
| ENSMUSG00000032691  | 0.218731023 | -2.192770238 | 3.02E-05 | 0.00015908 | 62.7625626 | 157.178481 | 69.5695257 | 31.25976957 | 18.19335056 | 13.84889513 | Nlrp3         |
| ENSMUSG00000024511  | 2.736291976 | 1.452222181  | 3.06E-05 | 0.0001611  | 316.502637 | 283.903632 | 130.442861 | 491.6309214 | 861.7902898 | 650.8980712 | Rab27b        |
| ENSMUSG00000037375  | 0.373797866 | -1.419669763 | 3.07E-05 | 0.00016141 | 103.109924 | 91.3599922 | 145.350616 | 32.20703531 | 43.08951449 | 51.43875335 | Hhat          |
| ENSMUSG00000006585  | 0.374726121 | -1.416091547 | 3.08E-05 | 0.0001617  | 87.8675876 | 126.72515  | 135.412113 | 56.83594467 | 38.30179066 | 35.61144462 | Cdt1          |
| ENSMUSG00000084111  | 6.486049034 | 2.69733993   | 3.09E-05 | 0.00016242 | 3.58643215 | 8.84128957 | 6.2115648  | 23.68164361 | 40.21688019 | 56.38478732 | Gm15710       |
| ENSMUSG000000081382 | 11.84318982 | 3.565985801  | 3.10E-05 | 0.00016254 | 0.89660804 | 1.96473102 | 3.72693888 | 17.0507834  | 30.64143253 | 26.70858347 | Rhl18-ps1     |
| ENSMUSG00000021260  | 0.229926927 | -2.120752376 | 3.13E-05 | 0.00016391 | 150.63015  | 82.5187026 | 52.1771443 | 17.99804914 | 17.2358058  | 30.66541065 | Hpi209        |
| ENSMUSG00000054383  | 3.081047958 | 1.623421139  | 3.18E-05 | 0.00016671 | 19.7253768 | 19.6473102 | 16.1500685 | 53.04688169 | 51.70741739 | 67.26606207 | Pnma1         |
| ENSMUSG00000021234  | 2.796738807 | 1.483745524  | 3.21E-05 | 0.00016795 | 29.5880652 | 35.3651583 | 21.1193203 | 71.99219658 | 74.68849178 | 95.95305913 | Fam161b       |
| ENSMUSG00000034263  | 0.318117992 | -1.652366127 | 3.25E-05 | 0.00017021 | 240.290954 | 637.555214 | 518.044504 | 212.1875268 | 116.8204615 | 114.7479882 | Ifi209        |
| ENSMUSG00000034459  | 0.103795759 | -3.268180595 | 3.27E-05 | 0.00017112 | 657.213691 | 3133.74597 | 2955.46253 | 148.7207219 | 404.0838914 | 147.3918125 | Ifi11         |
| ENSMUSG00000043953  | 2.053457264 | 1.038054923  | 3.28E-05 | 0.00017124 | 137.18103  | 197.455467 | 116.777418 | 287.0215206 | 293.0086985 | 349.1899987 | Ccr12         |
| ENSMUSG00000097383  | 4.828261866 | 2.271503924  | 3.37E-05 | 0.00017596 | 10.7592964 | 9.82365508 | 8.69619071 | 27.47070659 | 64.15549935 | 50.44954655 | L00026H17Rik  |
| ENSMUSG00000025551  | 3.008841646 | 1.58920818   | 3.37E-05 | 0.00017617 | 270.775627 | 128.689881 | 85.7195942 | 465.1074805 | 458.6639431 | 541.0961169 | Egf14         |
| ENSMUSG00000042489  | 0.29409716  | -1.766064264 | 3.40E-05 | 0.00017725 | 86.9709796 | 111.007302 | 50.9348313 | 20.83984638 | 22.98107439 | 29.67620385 | Clsnp         |
| ENSMUSG00000073491  | 0.244974207 | -2.030358678 | 3.51E-05 | 0.00018258 | 92.3506278 | 369.369431 | 253.431844 | 78.62305679 | 49.49271937 | Ifi213      |               |
| ENSMUSG00000046207  | 0.459612704 | -1.12150942  | 3.52E-05 | 0.00018327 | 160.492839 | 269.168149 | 268.339599 | 105.1464976 | 107.2450138 | 107.8235407 | Pik3r6        |
| ENSMUSG00000020178  | 0.498741985 | -1.003634439 | 3.61E-05 | 0.00018735 | 134.491206 | 165.037405 | 191.316196 | 78.62305679 | 81.39130518 | 84.08257759 | Adora2a       |
| ENSMUSG00000039385  | 2.549437864 | 1.350179176  | 3.62E-05 | 0.00018788 | 162.286055 | 95.2894542 | 69.5695257 | 260.4980797 | 263.3248106 | 314.567609  | Cdh6          |
| ENSMUSG00000052316  | 0.080539566 | -3.634158497 | 3.63E-05 | 0.00018822 | 201.736808 | 209.243853 | 1236.10139 | 55.88867892 | 44.04705926 | 32.64382424 | Lrrc15        |
| ENSMUSG00000101111  | 2.451714184 | 1.293790802  | 3.64E-05 | 0.00018877 | 68.1422108 | 128.689881 | 152.804494 | 314.4922272 | 279.6030718 | 259.1721803 | Gm28437       |
| ENSMUSG00000028855  | 0.150668571 | 3.193877154  | 3.65E-05 | 0.00018916 | 8.96608037 | 2.94709652 | 11.1808166 | 20.83984638 | 128.3109987 | 60.3416145  | Rhd           |
| ENSMUSG00000090173  | 2.660669817 | 1.411789486  | 3.67E-05 | 0.00019037 | 27.7948491 | 23.5767722 | 29.815511  | 66.30860211 | 66.07058888 | 83.09337079 | Fbxw10        |
| ENSMUSG00000085925  | 0.143159171 | -2.843079999 | 3.75E-05 | 0.00019416 | 26.9892411 | 31.4359662 | 90.688846  | 8.5253917   | 5.745268599 | 6.924447566 | Rtl1          |
| ENSMUSG00000053040  | 0.481194211 | -1.055308808 | 3.80E-05 | 0.00019665 | 137.18103  | 181.737619 | 157.773746 | 90.93751147 | 67.02813365 | 71.22288925 | Aph1c         |
| ENSMUSG00000050299  | 2.956715196 | 1.563995284  | 3.83E-05 | 0.00019847 | 35.8643215 | 76.6245096 | 70.8118387 | 202.7148693 | 122.5657301 | 214.6578745 | Gm9843        |
| ENSMUSG00000096506  | 0.324234812 | -1.624889096 | 3.85E-05 | 0.00019913 | 53.7964822 | 61.889027  | 53.4194572 | 21.78711212 | 19.15089533 | 13.84889513 | CR974586.5    |
| ENSMUSG00000027737  | 0.12131082  | -3.043219865 | 3.87E-05 | 0.00020001 | 45.7270099 | 358.56341  | 124.231296 | 29.36523808 | 27.76879823 | 6.924447566 | Slc7a11       |
| ENSMUSG00000071317  | 2.862345236 | 1.51719769   | 3.88E-05 | 0.00020042 | 83.3845474 | 239.697184 | 120.504357 | 470.791075  | 423.2347868 | 375.8985821 | Bves          |
| ENSMUSG00000056508  | 3.227275837 | 1.690316891  | 3.91E-05 | 0.00020217 | 17.9321607 | 12.7707516 | 21.1193203 | 48.31055297 | 56.49514122 | 61.3308213  | 1700001K19Rik |
| ENSMUSG00000051000  | 2.904922763 | 1.538499805  | 3.92E-05 | 0.00020238 | 86.0743716 | 231.38326  | 98.1427238 | 365.6445774 | 406.9565257 | 437.2294034 | Fam160a1      |
| ENSMUSG00000103032  | 0.239228815 | -2.063536926 | 3.93E-05 | 0.00020304 | 30.4846733 | 41.2593513 | 49.6925184 | 9.472657445 | 10.53299243 | 8.902861156 | Gm37121       |
| ENSMUSG00000025993  | 0.330939764 | -1.595359445 | 3.96E-05 | 0.00020463 | 273.465451 | 315.339328 | 572.706274 | 191.3476804 | 103.4148348 | 89.02861156 | Slc40a1       |
| ENSMUSG00000111065  | 5.957744659 | 2.574766293  | 3.99E-05 | 0.00020576 | 3.58643215 | 3.92946203 | 8.69619071 | 32.20703531 | 27.76879823 | 63.3303103  | Gm47676       |
| ENSMUSG00000081165  | 6.917527424 | 2.790256458  | 4.04E-05 | 0.00020834 | 5.37964822 | 1.96473102 | 4.96925184 | 24.62890936 | 33.51406683 | 26.70858347 | Gm11783       |
| ENSMUSG00000020330  | 0.336794309 | -1.570060333 | 4.05E-05 | 0.00020869 | 86.9709796 | 157.178481 | 135.412113 | 27.47070659 | 47.87723832 | 52.42796014 | Hmmr          |
| ENSMUSG00000083907  | 4.176348073 | 2.062241957  | 4.05E-05 | 0.00020869 | 14.3457286 | 6.87655855 | 8.69619071 | 44.52148999 | 40.21688019 | 41.5466854  | Pik-ps1       |
| ENSMUSG00000058755  | 0.185023952 | -2.434216053 | 4.11E-05 | 0.00021146 | 29.5880652 | 75.6421441 | 55.9040832 | 12.31445468 | 12.44808196 | 4.946033976 | Osm           |
| ENSMUSG00000079588  | 0.161232293 | -2.632787369 | 4.15E-05 | 0.0002133  | 109.386181 | 734.8094   | 193.800822 | 41.67969276 | 88.09411851 | 37.58985821 | Tmem102       |
| ENSMUSG00000097124  | 0.269482088 | -1.891738714 | 4.17E-05 | 0.00021417 | 615.073113 | 365.439969 | 149.077555 | 82.41211977 | 93.83938711 | 128.5968834 | A530020G20Rik |
| ENSMUSG00000095677  | 0.40771286  | -1.294374634 | 4.18E-05 | 0.0002144  | 96.833668  | 79.5716061 | 108.081227 | 42.6269585  | 30.64143253 | 42.53589219 | Dynl1f        |
| ENSMUSG00000021823  | 2.906485481 | 1.539275702  | 4.19E-05 | 0.00021523 | 2830.59157 | 1745.66351 | 759.053218 | 5251.641287 | 4846.134063 | 5414.917997 | Vcl           |
| ENSMUSG00000044788  | 0.348683412 | -1.520010364 | 4.26E-05 | 0.00021859 | 116.559045 | 84.843337  | 90.688846  | 46.41602148 | 32.5562206  | 22.7515629  | Fads6         |
| ENSMUSG00000070336  | 8.50137227  | 3.088672963  | 4.32E-05 | 0.00022112 | 6.27625626 | 5.89419305 | 1.24231296 | 20.83984638 | 34.47161159 | 62.32002809 | Foxo47        |
| ENSMUSG00000029379  | 0.043665133 | -4.517374467 | 4.32E-05 | 0.00022121 | 5.37964822 | 129.672247 | 40.9963277 | 1.894531489 | 4.787723832 | 0.989206795 | Cxcl3         |
| ENSMUSG00000033220  | 0.34554493  | -1.533054785 | 4.34E-05 | 0.00022202 | 452.787059 | 884.128957 | 641.033487 | 348.593794  | 201.084401  | 133.5429173 | Rac2          |
| ENSMUSG00000036362  | 0.330009427 | -1.599420859 | 4.40E-05 | 0.0002251  | 53.7964822 | 55.9948339 | 59.631022  | 23.68164361 | 16.27826103 | 15.82730872 | P2ry13        |
| ENSMUSG00000110439  | 0.191897617 | -2.381591296 | 4.48E-05 | 0.00022892 | 78.9015073 | 47.1535444 | 53.4194572 | 18.94531489 | 11.4905372  | 3.956827181 | Gm21320       |
| ENSMUSG00000081209  | 54.26021797 | 5.761822938  | 4.49E-05 | 0.00022937 | 0          | 0.98236551 | 0          | 17.0507834  | 13.40562673 | 29.67620385 | Gm14890       |
| ENSMUSG00000050711  | 0.119935735 | -3.059666525 | 4.62E-05 | 0.00023569 | 29.5880652 | 16.7002136 | 26.0885721 | 2.841797233 | 2.872634299 | 2.967620385 | Scg2          |
| ENSMUSG00000025723  | 0.426832137 | -1.228259292 | 4.68E-05 | 0.00023821 | 101.316708 | 104.130744 | 144.108303 | 40.73242701 | 53.62250692 | 54.40633733 | Nmb           |
| ENSMUSG00000016386  | 3.18111053  | 1.6695305    | 4.75E-05 | 0.00024165 | 19.7253768 | 20.6296757 | 43.4809536 | 77.67579105 | 86.17902898 | 98.92067951 | Mppd2         |
| ENSMUSG00000083822  | 0.048641597 | -4.361665594 | 4.76E-05 | 0.00024207 | 8.06947233 | 40.2769858 | 31.057824  | 1.894531489 | 0.957544766 | 0.989206795 | Hmgb1-ps5     |
| ENSMUSG00000051984  | 2.165700526 | 1.11483376   | 4.78E-05 | 0.00024279 |            |            |            |             |             |             |               |

|                     |              |              |          |            |            |            |            |             |             |             |               |
|---------------------|--------------|--------------|----------|------------|------------|------------|------------|-------------|-------------|-------------|---------------|
| ENSMUSG00000002565  | 0.28310838   | -1.820573639 | 5.23E-05 | 0.00026252 | 91.4540198 | 116.901495 | 45.9655795 | 27.47070659 | 22.02352963 | 22.75175629 | Scin          |
| ENSMUSG000000051985 | 0.029726979  | -5.072083337 | 5.23E-05 | 0.00026265 | 47.520226  | 833.04595  | 178.893066 | 20.83984638 | 7.660358132 | 2.967620385 | Igfn1         |
| ENSMUSG000000098645 | 0.153760157  | -2.701246379 | 5.28E-05 | 0.00026475 | 29.5880652 | 47.1535444 | 118.019731 | 9.472657445 | 14.3631715  | 5.935240771 | Gm27201       |
| ENSMUSG000000040170 | 2.45225986   | 1.29411866   | 5.28E-05 | 0.00026508 | 9378.52007 | 5338.17417 | 3480.96091 | 17174.87521 | 14922.37764 | 12533.25009 | Fmo2          |
| ENSMUSG000000021098 | 2.882639308  | 1.52739033   | 5.40E-05 | 0.00026994 | 28.6914572 | 18.6649446 | 26.0885721 | 60.62500765 | 65.11304412 | 86.06099118 | 4930447C04Rik |
| ENSMUSG000000024677 | 0.482695316  | -1.050815267 | 5.41E-05 | 0.00027063 | 443.820978 | 727.932841 | 566.494709 | 222.6074499 | 262.367266  | 354.1360327 | Ms4a6b        |
| ENSMUSG000000079685 | 0.167465131  | -2.578067364 | 5.42E-05 | 0.00027114 | 34.0711054 | 31.4356962 | 32.3001369 | 2.841797233 | 9.575447664 | 3.956827181 | Ulbp1         |
| ENSMUSG000000100600 | 17.35308325  | 4.117120115  | 5.45E-05 | 0.00027227 | 1.79321607 | 0          | 2.48462592 | 16.10351766 | 19.15089533 | 36.60065142 | A230077H06Rik |
| ENSMUSG000000044309 | 0.064221604  | -3.960797484 | 5.56E-05 | 0.00027749 | 21.5185929 | 24.5591377 | 13.6654426 | 1.894531489 | 0.957544766 | 0.989206795 | Apol7c        |
| ENSMUSG000000052951 | 0.149969967  | -2.737254476 | 5.63E-05 | 0.00028089 | 48.416834  | 25.5415032 | 28.5731981 | 2.841797233 | 8.617902398 | 3.956827181 | C130021I20Rik |
| ENSMUSG000000105128 | 69.42029399  | 6.11728557   | 5.65E-05 | 0.00028145 | 0          | 1.96473102 | 0          | 90.93751147 | 2.872634299 | 46.49271937 | Gm42870       |
| ENSMUSG000000041757 | 2.20512269   | 1.140858928  | 5.67E-05 | 0.00028242 | 198.150376 | 159.143212 | 157.773746 | 494.4727186 | 252.7918183 | 389.7474773 | Plekha6       |
| ENSMUSG000000035929 | 0.417387491  | -1.260540731 | 5.73E-05 | 0.00028547 | 2067.57813 | 5092.58279 | 2911.98158 | 1190.713041 | 1308.006151 | 1705.392515 | H2-Q4         |
| ENSMUSG000000047182 | 0.397062852  | -1.332560702 | 5.79E-05 | 0.00028821 | 146.14711  | 80.5539716 | 127.958235 | 48.31055297 | 44.04705926 | 48.47113296 | Irs3          |
| ENSMUSG000000000942 | 2.858912754  | 1.515466594  | 5.92E-05 | 0.00029434 | 30.4846733 | 31.4356962 | 32.3001369 | 125.0390783 | 73.73094702 | 70.23368245 | Hoxa4         |
| ENSMUSG000000074874 | 3.834305114  | 1.938965144  | 5.94E-05 | 0.00029523 | 220.565577 | 249.520839 | 311.820553 | 370.3809061 | 1888.278279 | 737.9482692 | Ctla2b        |
| ENSMUSG000000086841 | 0.480311711  | -1.05795711  | 5.95E-05 | 0.00029538 | 392.71432  | 613.978442 | 734.206959 | 233.0273731 | 303.541691  | 298.7404521 | 2410006H16Rik |
| ENSMUSG000000024036 | 2.663276987  | 1.41320248   | 6.00E-05 | 0.00029807 | 34.0711054 | 59.924296  | 31.057824  | 126.9336098 | 100.5422005 | 106.8343339 | Slc37a1       |
| ENSMUSG000000058905 | 8.00126947   | 3.000228914  | 6.08E-05 | 0.00030156 | 0.89660804 | 5.89419305 | 3.72693888 | 30.31250382 | 26.81125346 | 25.71937667 | Gm10051       |
| ENSMUSG00000005947  | 0.252798886  | 6.1193937989 | 6.11E-05 | 0.00030284 | 41.2439697 | 55.9948339 | 39.7540147 | 16.10351766 | 7.660358132 | 10.88127475 | Gm42870       |
| ENSMUSG000000051243 | 0.40358665   | -1.309049642 | 6.17E-05 | 0.00030529 | 150.63015  | 158.160847 | 290.701232 | 74.83399381 | 84.26393945 | 82.104164   | Islr2         |
| ENSMUSG000000022485 | 0.444451008  | -1.169903698 | 6.18E-05 | 0.00030591 | 192.770728 | 131.636978 | 122.988983 | 75.78125956 | 63.19795459 | 60.3416145  | Hoxc5         |
| ENSMUSG000000037313 | 0.45967573   | -1.1213116   | 6.25E-05 | 0.00030914 | 224.152009 | 231.38286  | 355.301506 | 117.4609523 | 102.45729   | 152.3378465 | Tacc3         |
| ENSMUSG000000100210 | 12.78945334  | 3.676882695  | 6.27E-05 | 0.00030956 | 1.79321607 | 0.98236551 | 2.48462592 | 14.20898617 | 22.02352963 | 29.67620385 | Hist1h3f      |
| ENSMUSG000000084992 | 42.30161585  | 5.402640868  | 6.32E-05 | 0.00031199 | 0          | 0          | 2.48462592 | 12.31445468 | 59.36777552 | 19.7841359  | Gm13842       |
| ENSMUSG000000032766 | 2.940167141  | 1.555898171  | 6.35E-05 | 0.00031329 | 1179.03957 | 1383.17063 | 1550.40657 | 1914.42407  | 6936.454288 | 3239.652254 | Gng11         |
| ENSMUSG000000017453 | 3.24639156   | 1.698837019  | 6.49E-05 | 0.00032004 | 69.9354269 | 50.1006409 | 23.6039462 | 176.1914285 | 110.1176481 | 183.9924639 | Pipox         |
| ENSMUSG000000093838 | 0.011113157  | -6.491587519 | 6.55E-05 | 0.00032283 | 74.4184671 | 4.91182754 | 13.6654426 | 0           | 0.957544766 | 0           | Ighv3-1       |
| ENSMUSG000000019136 | 4.633444153  | 2.212084983  | 6.56E-05 | 0.00032332 | 19.7253768 | 5.89419305 | 8.69619071 | 42.6269585  | 62.24040982 | 56.38478732 | Gm45114       |
| ENSMUSG000000032372 | 0.486494696  | -1.039504018 | 6.57E-05 | 0.00032335 | 198.150376 | 174.86106  | 126.715922 | 83.35938551 | 80.43376038 | 80.12575041 | Plscr2        |
| ENSMUSG000000050663 | 0.208014605  | -2.265243272 | 6.76E-05 | 0.00033167 | 34.0711054 | 34.3827928 | 28.5731981 | 9.472657445 | 4.787723832 | 5.935240771 | Thrde         |
| ENSMUSG000000040666 | 2.670863309  | 1.417306143  | 6.83E-05 | 0.00033503 | 1009.58065 | 2899.94298 | 1165.28956 | 4697.490827 | 4558.870633 | 4299.092732 | Sh3bgr        |
| ENSMUSG000000060240 | 2.128708627  | 1.08997849   | 6.88E-05 | 0.00033716 | 73.521859  | 56.9771994 | 75.7810905 | 151.5625191 | 117.7780063 | 169.154362  | Cend1         |
| ENSMUSG000000105224 | 0.213240566  | -2.229446378 | 6.93E-05 | 0.00033942 | 37.6575376 | 81.5363371 | 157.773746 | 20.83984638 | 18.19335056 | 19.7841359  | Gm3364        |
| ENSMUSG000000043153 | 0.407790609  | -1.294099543 | 6.94E-05 | 0.00034008 | 93.2472359 | 81.5363371 | 73.2964646 | 33.15430106 | 27.76879823 | 40.5574786  | Ispd          |
| ENSMUSG000000069515 | 0.226521298  | -2.14228139  | 6.95E-05 | 0.00034033 | 288.707788 | 742.668324 | 347.847629 | 180.9277572 | 94.79693188 | 36.60065142 | Lyz1          |
| ENSMUSG000000094546 | 0.043911072  | -4.509271436 | 6.96E-05 | 0.00034057 | 26.8982411 | 45.1888133 | 14.9077555 | 3.789062978 | 0           | 0           | Ighv1-26      |
| ENSMUSG000000105748 | 0.827227609  | -1.799733664 | 7.01E-05 | 0.00034261 | 59.1761304 | 86.4481647 | 144.108303 | 22.73437787 | 36.38670112 | 23.74096308 | Gm43088       |
| ENSMUSG000000001281 | 0.302815019  | -1.723491334 | 7.02E-05 | 0.00034304 | 160.492839 | 416.522975 | 250.947218 | 126.9336098 | 59.36777552 | 64.29844168 | Igtb7         |
| ENSMUSG000000109517 | 0.139658397  | -2.840025773 | 7.03E-05 | 0.00034352 | 24.208417  | 23.5767722 | 28.5731981 | 2.841797233 | 1.915089533 | 5.935240771 | Gm44763       |
| ENSMUSG000000107091 | 0.269519241  | -1.891539822 | 7.06E-05 | 0.00034481 | 108.489572 | 181.737619 | 427.355658 | 62.51953913 | 63.19795459 | 67.26606207 | Gm43343       |
| ENSMUSG000000076934 | 0.19340889   | -2.370273987 | 7.08E-05 | 0.00034597 | 74.4184671 | 192.543639 | 55.9040832 | 32.20703531 | 11.4905372  | 18.79492911 | Igvl1         |
| ENSMUSG000000035121 | 0.259791249  | -1.94457526  | 7.13E-05 | 0.00034804 | 36.7609295 | 36.3475238 | 38.5117017 | 7.578125956 | 9.575447664 | 11.87048154 | Neil2         |
| ENSMUSG000000027224 | 0.174668361  | -2.517309786 | 7.17E-05 | 0.00034987 | 44.8304019 | 30.4533307 | 68.3272128 | 14.20898617 | 3.830179066 | 6.924447566 | Duoxa1        |
| ENSMUSG000000046275 | 0.450581361  | -1.150140458 | 7.19E-05 | 0.0003509  | 1103.72449 | 503.953505 | 1016.212   | 376.0645006 | 423.2347868 | 382.8230297 | Tusc5         |
| ENSMUSG000000035186 | 0.123910703  | -3.012627285 | 7.37E-05 | 0.0003589  | 15.2423366 | 131.636978 | 63.3579609 | 9.472657445 | 7.660358132 | 8.902861156 | Ubd           |
| ENSMUSG000000103593 | 2.620583591  | 1.389888129  | 7.40E-05 | 0.00036011 | 102.213316 | 63.853758  | 52.1771443 | 253.8672195 | 165.6552446 | 155.3054668 | Gm37352       |
| ENSMUSG000000025475 | 0.10619743   | -3.235179247 | 7.44E-05 | 0.00036201 | 29.5880652 | 12.7707516 | 39.7540147 | 1.894531489 | 3.830179066 | 2.967620385 | Adgral1       |
| ENSMUSG000000050700 | 0.225453595  | -2.149097579 | 7.45E-05 | 0.00036228 | 50.2100501 | 25.5415032 | 48.4502054 | 10.41992319 | 7.660358132 | 9.892067951 | Emilin3       |
| ENSMUSG000000024727 | 0.304976585  | -1.713229612 | 7.49E-05 | 0.00036379 | 65.4523867 | 50.1006409 | 62.115648  | 16.10351766 | 12.44808196 | 25.71937667 | Trpm6         |
| ENSMUSG000000083863 | 2.634621807  | 1.397595882  | 7.49E-05 | 0.00036379 | 22.4152009 | 42.2417168 | 43.4809536 | 96.62110594 | 89.05166328 | 96.94226592 | Gm13341       |
| ENSMUSG000000095079 | 0.040933815  | -4.610563062 | 7.49E-05 | 0.00036379 | 3644.71167 | 8378.59541 | 6351.94616 | 115.5664208 | 612.8286055 | 23.74096308 | Igha          |
| ENSMUSG000000020185 | 0.206505137  | -2.275750423 | 7.51E-05 | 0.00036441 | 59.1761304 | 76.6245096 | 88.2042201 | 7.578125956 | 29.68388776 | 8.902861156 | E2f7          |
| ENSMUSG000000093561 | 0.263711091  | -2.078800789 | 7.52E-05 | 0.00036502 | 34.0711054 | 74.6597786 | 108.081227 | 18.94531489 | 15.32071626 | 16.81651552 | NA            |
| ENSMUSG000000075010 | 0.379421189  | -1.398127845 | 7.68E-05 | 0.00037211 | 282.431532 | 759.368537 | 513.075252 | 176.1914285 | 173.3156027 | 240.3772512 | AW112010      |
| ENSMUSG000000026885 | 2.150924669  | 1.104956999  | 7.71E-05 | 0.00037313 | 53.7964822 | 55.0124684 | 57.1463961 | 105.1464976 | 145.5468045 | 105.8451271 | Ttll11        |
| ENSMUSG000000037385 | 11.072211738 | 3.468859237  | 7.71E-05 | 0.00037313 | 1.7182643  | 1.96473102 | 0          | 24.62890936 | 29.68388776 | 52.42796014 | Krtap5-5      |
| ENSMUSG000000045362 | 0.44558226   | -1.1662363   | 7.73E-05 | 0.00037391 | 108.489572 | 167.984502 | 125.473609 | 68.2031336  | 59.36777552 | 51.43875335 | Tnfrsf26      |
| ENSMUSG000000080203 | 12.38483293  | 3.630502502  | 7.78E-05 | 0.0003759  | 0          | 3.92946203 | 2.48462592 | 17.0507834  | 28.72634299 | 31.65461744 | Rpl17-ps8     |
| ENSMUSG000000097823 | 2.248240611  | 1.168796444  | 7.92E-05 | 0.00038248 | 38.5541456 | 34.3827928 | 37.2693888 | 88.09571424 | 76.60358132 | 83.09337079 | Gm16701       |
| ENSMUSG000000036223 | 0.162482596  | -2.621642899 | 8.01E-05 | 0.00038627 | 21.5185929 | 28.4885997 | 39.7540147 | 2.841797233 | 4.787723832 | 6.924447566 | Ska1          |
| ENSMUSG000000074491 | 21.60138383  | 4.433051832  | 8.06E-05 | 0.00038861 | 0          | 1.96473102 | 1.24231296 | 32.20703531 | 22.98107439 | 11.87048154 | Clec4g        |
| ENSMUSG000000034317 | 2.17181889   | 1.118903801  | 8.18E-05 | 0.00039405 | 240.290954 | 201.032239 | 244.735653 | 320.1758216 | 679.8567842 | 533.1824626 | Trim59        |
| ENSMUSG000000080021 | 7.397733636  | 2.887083356  | 8.32E-05 | 0.00040014 | 5.37964822 | 3.92946203 | 8.69619071 | 17.99804914 | 74.68849178 | 38.57906501 | Gm5915        |
| ENSMUSG000000063229 | 0.409089798  | -1.289510534 | 8.51E-05 | 0.00040864 | 6673.45362 | 18204.2152 | 9180.69277 | 4350.791564 | 5363.208237 | 4218.966981 | Ldha          |
| ENSMUSG000000104851 | 0.189942962  | -2.396361837 | 8.52E-05 | 0.00040884 | 60.0727385 | 108.060206 | 267.097286 | 33.15430106 | 36.38670112 | 12.85968834 | Neog206E10Rik |
| ENSMUSG000000079053 | 0.09161753   | -3.448232523 | 8.62E-05 | 0.00041361 | 13.449120  |            |            |             |             |             |               |

|                     |             |              |            |            |            |            |            |             |             |             |               |
|---------------------|-------------|--------------|------------|------------|------------|------------|------------|-------------|-------------|-------------|---------------|
| ENSMUSG00000057606  | 0.151170184 | -2.725754474 | 9.65E-05   | 0.00045793 | 17.9321607 | 55.0124684 | 36.0270758 | 3.789062978 | 4.787723832 | 7.913654361 | Colq          |
| ENSMUSG00000021135  | 19.49502198 | 4.285033876  | 9.68E-05   | 0.0004592  | 1.79321607 | 3.92946203 | 3.72693888 | 158.1933793 | 11.4905372  | 12.85968834 | Slc10a1       |
| ENSMUSG00000007786  | 0.485274954 | -1.043125694 | 9.70E-05   | 0.00046014 | 545.137687 | 458.764692 | 841.045873 | 269.0234714 | 357.1641979 | 268.0750415 | Nnat          |
| ENSMUSG00000095217  | 8.768749859 | 3.132371176  | 9.94E-05   | 0.00047118 | 2.68982411 | 2.94709652 | 4.96925184 | 25.5761751  | 50.74987262 | 14.83810193 | Hist1h2bn     |
| ENSMUSG00000047798  | 0.242240721 | -2.045486693 | 9.97E-05   | 0.00047231 | 103.109924 | 221.032239 | 177.650753 | 69.15039935 | 36.38670112 | 15.82730872 | Cd300lf       |
| ENSMUSG000000100131 | 2.099931382 | 1.070342187  | 9.98E-05   | 0.00047245 | 43.9337938 | 44.2064478 | 48.4502054 | 104.1992319 | 92.88184235 | 89.02861156 | Gm28439       |
| ENSMUSG00000046818  | 0.263614593 | -1.923497856 | 0.00010002 | 0.00047342 | 201.736808 | 573.701456 | 219.889394 | 68.2031336  | 139.8015359 | 54.40637373 | Ddit4l        |
| ENSMUSG00000086763  | 0.139303971 | -2.843691706 | 0.00010043 | 0.0004752  | 15.2423366 | 41.2593513 | 33.5424499 | 5.683594467 | 3.830179066 | 2.967620385 | Plxna4os1     |
| ENSMUSG00000090386  | 0.405024656 | -1.30391836  | 0.00010051 | 0.00047546 | 873.296228 | 1495.1603  | 2453.56809 | 637.509846  | 749.7575521 | 564.83708   | Mir99ahg      |
| ENSMUSG00000027456  | 0.468694754 | -1.093279449 | 0.00010073 | 0.00047636 | 96.833668  | 121.813323 | 113.050479 | 43.57422425 | 60.32532029 | 51.43875335 | Sdcbp2        |
| ENSMUSG00000021451  | 0.390589716 | -1.35627413  | 0.00010076 | 0.0004764  | 406.163441 | 760.350903 | 419.90178  | 298.3887095 | 156.0797969 | 165.1975348 | Sema4d        |
| ENSMUSG00000035373  | 0.064578466 | -3.952803019 | 0.00010083 | 0.00047656 | 310.226381 | 731.862303 | 1198.83201 | 24.62890936 | 109.1601034 | 10.88127475 | Ccl7          |
| ENSMUSG000000103662 | 0.309277429 | -1.693026547 | 0.00010178 | 0.00048077 | 106.696356 | 87.4305302 | 44.7232665 | 25.5761751  | 24.89616393 | 23.74096308 | Gm34294       |
| ENSMUSG00000010461  | 0.261215577 | -1.936687163 | 0.00010294 | 0.00048616 | 82.4879394 | 113.954399 | 43.4809536 | 13.26172042 | 23.93861916 | 25.71937667 | Eya4          |
| ENSMUSG00000043673  | 2.420504465 | 1.275307756  | 0.00010314 | 0.00048695 | 178.424999 | 93.3247232 | 114.292792 | 414.9023961 | 239.3861916 | 281.9239366 | Kcns3         |
| ENSMUSG00000020212  | 0.298850623 | -1.742503545 | 0.00010527 | 0.00049603 | 59.1761304 | 60.9066615 | 99.3850367 | 25.5761751  | 26.81125346 | 12.85968834 | Enox1         |
| ENSMUSG00000033705  | 0.454868978 | -1.136477048 | 0.00010611 | 0.00049982 | 1978.81394 | 1145.43818 | 872.103697 | 609.0918737 | 540.0552483 | 669.6930003 | Stad9         |
| ENSMUSG00000039960  | 0.47684032  | -1.068421865 | 0.00010641 | 0.00050111 | 529.89535  | 655.237794 | 1098.20466 | 372.2754376 | 357.1641979 | 358.0928598 | Rhou          |
| ENSMUSG00000008540  | 0.495313193 | -1.013587046 | 0.00010646 | 0.00050121 | 3596.29484 | 2758.48235 | 3873.53181 | 2353.955375 | 1517.708455 | 1193.972602 | Mgst1         |
| ENSMUSG00000020649  | 0.438728442 | -1.188599858 | 0.00010764 | 0.00050665 | 198.150376 | 249.520839 | 253.431844 | 76.7285253  | 156.5043493 | 84.08257759 | Rrm2          |
| ENSMUSG00000021384  | 0.372435133 | -1.424938922 | 0.00010779 | 0.00050715 | 70.8320349 | 141.460633 | 116.777418 | 47.36328722 | 36.38670112 | 38.57906501 | Susd3         |
| ENSMUSG00000095385  | 0.117816824 | -3.085382525 | 0.00010794 | 0.0005076  | 18.8287688 | 24.5591377 | 22.3616333 | 0.947265744 | 2.872634299 | 3.956827181 | D630033011Rik |
| ENSMUSG000000109735 | 3.417919666 | 1.773118489  | 0.00011057 | 0.00051909 | 13.4491206 | 12.7707516 | 9.93850367 | 38.83789552 | 38.30179066 | 47.48192617 | Gm45667       |
| ENSMUSG00000039853  | 0.375272028 | -1.413991336 | 0.00011297 | 0.00052963 | 79.7981153 | 88.4128957 | 64.6002739 | 38.83789552 | 24.89616393 | 23.74096308 | Trim14        |
| ENSMUSG00000026126  | 0.333845149 | -1.582749017 | 0.00011469 | 0.00053696 | 289.604396 | 519.671354 | 627.368044 | 81.46485402 | 232.6833782 | 165.1975348 | Ptpn18        |
| ENSMUSG00000032511  | 0.39537161  | -1.338718815 | 0.00011567 | 0.00054125 | 122.833031 | 81.5363371 | 80.7503423 | 30.31250382 | 38.30179066 | 44.51430578 | Scn5a         |
| ENSMUSG00000061533  | 2.201229549 | 1.1383096    | 0.00011732 | 0.00054866 | 139.870854 | 145.390095 | 116.777418 | 193.2422119 | 306.4143253 | 386.7798569 | Cep128        |
| ENSMUSG00000086845  | 4.543378699 | 2.183765562  | 0.00011759 | 0.00054946 | 4.8304019  | 12.7707516 | 9.93850367 | 35.04883255 | 51.70741399 | 35.61144462 | Gm13010       |
| ENSMUSG00000023043  | 1.243087269 | 1.0996906    | 0.00011777 | 0.00055008 | 86.9709796 | 128.863629 | 114.292792 | 285.1269891 | 265.2399003 | 251.258526  | Krt18         |
| ENSMUSG00000038932  | 0.070365484 | -3.828988257 | 0.0001193  | 0.00055668 | 29.5880652 | 12.7707516 | 53.4194572 | 1.894531489 | 4.787723832 | 0           | Tcf15         |
| ENSMUSG00000081583  | 3.551028308 | 1.828236861  | 0.00011958 | 0.00055784 | 13.4491206 | 12.7707516 | 33.5424499 | 76.7285253  | 61.28286505 | 70.23368245 | Gm14769       |
| ENSMUSG00000025019  | 2.526138965 | 1.336934005  | 0.00011999 | 0.00055956 | 161.389447 | 102.166013 | 62.115648  | 236.8164361 | 280.5606166 | 309.6217269 | Lcor          |
| ENSMUSG00000022225  | 0.483854551 | -1.047354664 | 0.00012117 | 0.00056475 | 183.804648 | 315.339328 | 233.554836 | 119.3554838 | 133.0987225 | 101.8882999 | Cma1          |
| ENSMUSG00000050708  | 0.478725517 | -1.062729389 | 0.00012239 | 0.0005703  | 20787.8573 | 34091.0302 | 40949.1198 | 12078.58551 | 19937.99713 | 13857.79799 | Ftl1          |
| ENSMUSG000000102553 | 3.44536989  | 1.64658877   | 0.00012445 | 0.0005794  | 18.8287688 | 12.7707516 | 9.93850367 | 66.30860211 | 72.77340225 | 37.58985821 | D930036K23Rik |
| ENSMUSG00000056328  | 0.041751978 | -4.582011641 | 0.00012551 | 0.00058419 | 766.599872 | 11247.1027 | 1443.56766 | 115.5664208 | 354.2915636 | 91.99623195 | Myh1          |
| ENSMUSG000000107529 | 0.382933059 | -1.816377262 | 0.00012688 | 0.00059006 | 44.8304019 | 70.7303165 | 113.050479 | 17.99804914 | 26.81125346 | 19.7841359  | Gm44291       |
| ENSMUSG00000078700  | 2.059065681 | 1.04198985   | 0.00012767 | 0.0005931  | 92.3506278 | 78.5892406 | 84.4772812 | 134.5117357 | 172.358085  | 219.6039085 | D030028A08Rik |
| ENSMUSG00000055003  | 4.210923195 | 2.074136562  | 0.00012855 | 0.00059666 | 10.7592964 | 18.6649446 | 6.2115648  | 67.25586786 | 44.04705926 | 40.5574786  | Lrtm2         |
| ENSMUSG00000052889  | 0.286346008 | -1.804168606 | 0.00012885 | 0.00059775 | 242.980778 | 515.741891 | 653.456617 | 228.2910444 | 101.4997452 | 74.19050963 | Prkbc         |
| ENSMUSG000000508060 | 3.305390003 | 1.724820505  | 0.00012936 | 0.00059975 | 32.2778893 | 66.8008545 | 21.1193203 | 125.986344  | 166.6127894 | 106.8343339 | Phospho1      |
| ENSMUSG00000071860  | 29.36368415 | 4.875961084  | 0.00013051 | 0.00060462 | 0          | 1.96473102 | 0          | 18.94531489 | 25.85370869 | 14.83810193 | 2900055J20Rik |
| ENSMUSG00000056145  | 2.571098476 | 1.362384868  | 0.00013184 | 0.00060976 | 96.833668  | 172.896329 | 108.081227 | 264.2871427 | 473.0271146 | 234.4420104 | Al504432      |
| ENSMUSG00000097906  | 3.157742234 | 1.658893409  | 0.00013182 | 0.00060976 | 15.2423366 | 14.7354826 | 18.6346944 | 37.89062978 | 57.45288599 | 37.73399412 | Gm9625        |
| ENSMUSG00000029778  | 0.432363856 | -1.209682172 | 0.00013218 | 0.00061116 | 287.81118  | 173.878695 | 183.862318 | 68.2031336  | 96.71202141 | 114.7479882 | Adcyap1r1     |
| ENSMUSG00000024039  | 4.143539498 | 2.050863675  | 0.00013624 | 0.0006282  | 37.1744974 | 16.7002136 | 28.5731981 | 188.5058831 | 61.28286505 | 75.17971643 | Cbs           |
| ENSMUSG00000051124  | 0.48362835  | -1.048029279 | 0.00013794 | 0.00063546 | 107.592964 | 124.760419 | 108.081227 | 66.30860211 | 47.7723832  | 50.44954655 | Gimap9        |
| ENSMUSG00000089694  | 0.164301253 | -2.605584615 | 0.00013797 | 0.00063546 | 32.2778893 | 27.5062342 | 22.3616333 | 4.736328722 | 1.915089533 | 6.924447566 | Nat8f7        |
| ENSMUSG00000025938  | 0.140547153 | -2.83087386  | 0.00013854 | 0.00063722 | 43.9337938 | 220.049874 | 70.8118387 | 9.472657445 | 30.64143253 | 6.924447566 | Slco5a1       |
| ENSMUSG00000034438  | 0.178765447 | -2.483860186 | 0.00013996 | 0.00064306 | 56.4863063 | 282.921266 | 65.8425868 | 25.5761751  | 16.27826103 | 30.66541065 | Gbp8          |
| ENSMUSG00000025813  | 0.427850862 | -1.231579824 | 0.00014015 | 0.00064374 | 87.8675876 | 92.3423577 | 93.1734719 | 48.31055297 | 40.21688019 | 27.69779026 | Home2r        |
| ENSMUSG00000102344  | 0.16905629  | -2.564424397 | 0.00014056 | 0.00064545 | 17.9321607 | 46.1711789 | 73.2964646 | 8.5253917   | 8.617902898 | 5.935240771 | 9430053O09Rik |
| ENSMUSG00000089827  | 4.475221957 | 2.161959237  | 0.00014196 | 0.00065067 | 7.1728643  | 5.89419305 | 8.69619071 | 32.20703531 | 24.89616393 | 29.56827181 | 1700023H06Rik |
| ENSMUSG00000033249  | 0.490665329 | -1.027723752 | 0.00014275 | 0.00065408 | 101.316708 | 108.060206 | 100.62735  | 55.88867892 | 52.53250692 | 42.53589219 | Hst4          |
| ENSMUSG00000029638  | 2.299628288 | 1.201400683  | 0.000144   | 0.00065909 | 36.7609295 | 32.4180617 | 34.7847629 | 69.15039935 | 91.92429758 | 78.14733682 | Glici1        |
| ENSMUSG00000029373  | 2.932553472 | 1.552157415  | 0.00014522 | 0.00066433 | 524.515702 | 642.467042 | 914.342338 | 1014.521612 | 3498.686577 | 1587.676906 | Pf4           |
| ENSMUSG00000002835  | 0.14713932  | -1.261744681 | 0.00014838 | 0.00067805 | 91.4540198 | 137.531171 | 124.231296 | 57.78321041 | 54.5805169  | 34.62220473 | Chaf1a        |
| ENSMUSG00000041449  | 0.089746296 | -3.478003787 | 0.00014901 | 0.00068037 | 24.208417  | 21.6120412 | 18.6346944 | 0           | 3.830179066 | 1.97841359  | Serpina3h     |
| ENSMUSG00000037892  | 0.427091938 | -1.22738143  | 0.00015029 | 0.00068565 | 508.376757 | 213.173315 | 331.69756  | 154.4043163 | 151.2920731 | 144.4241921 | Pcdh18        |
| ENSMUSG00000020435  | 0.037522289 | -1.230213433 | 0.00015039 | 0.0006859  | 90.5574117 | 80.5539716 | 96.9004108 | 27.47070659 | 44.5705926  | 42.53589219 | Osbp2         |
| ENSMUSG00000039774  | 0.319708493 | -1.645171026 | 0.00015261 | 0.00069547 | 53.7964822 | 63.853758  | 50.9348313 | 24.62890936 | 11.4905372  | 17.80572231 | Gaint12       |
| ENSMUSG00000055612  | 0.402628346 | -1.312479351 | 0.00015307 | 0.00069691 | 70.8320349 | 68.7655855 | 105.596602 | 35.04883255 | 33.51406683 | 29.67620385 | Cdca7         |
| ENSMUSG00000022126  | 0.039854211 | -4.649124031 | 0.00015376 | 0.00069956 | 23.311809  | 562.895436 | 110.565853 | 13.26172042 | 10.53299243 | 3.956827181 | Acod1         |
| ENSMUSG00000098661  | 3.15682821  | 1.658475754  | 0.00015536 | 0.00070665 | 11.6559045 | 16.7002136 | 16.1500685 | 44.52148999 | 54.5805169  | 40.5574786  | Mir7052       |
| ENSMUSG00000038738  | 2.009430914 | 1.006786977  | 0.00015594 | 0.0007091  | 206.219849 | 113.954399 | 150.319868 | 269.9707372 | 348.546295  | 328.416656  | Shank1        |
| ENSMUSG00000028278  | 0.205420718 | -2.283346404 | 0.00015651 | 0.00071135 | 141.66407  | 860.552185 | 176.40844  | 69.15039935 | 91.92429758 | 81.114957   |               |

|                     |              |              |            |            |            |            |            |             |             |             |               |
|---------------------|--------------|--------------|------------|------------|------------|------------|------------|-------------|-------------|-------------|---------------|
| ENSMUSG00000028212  | 2.253208567  | 1.171980862  | 0.00017333 | 0.00078034 | 144.353894 | 172.896329 | 202.497012 | 233.0273731 | 459.6214879 | 476.7976753 | Ccne2         |
| ENSMUSG00000000094  | 0.093217487  | -3.423255573 | 0.00017404 | 0.00078336 | 19.7253768 | 24.5591377 | 17.3923814 | 2.841797233 | 2.872634299 | 0           | Tbx4          |
| ENSMUSG000000097467 | 0.095335981  | -3.390835374 | 0.00017459 | 0.00078531 | 17.9321607 | 16.7002136 | 26.0885721 | 3.789062978 | 0.957544766 | 0.989206795 | Gm26737       |
| ENSMUSG00000033196  | 0.253528344  | -1.97978105  | 0.00017507 | 0.00078669 | 128.214949 | 284.885997 | 67.0848998 | 33.15430106 | 36.38670112 | 52.42796014 | Myh2          |
| ENSMUSG000000064350 | 2.88762696   | 1.529884379  | 0.00017608 | 0.00079104 | 34.0711054 | 35.3651583 | 32.3001369 | 146.8261904 | 67.98567842 | 79.13654361 | mt-Ty         |
| ENSMUSG000000104116 | 3.754214572  | 1.90851111   | 0.0001768  | 0.00079407 | 15.2423366 | 14.7354826 | 7.45387776 | 61.57227339 | 34.47161159 | 46.49271937 | Gm37296       |
| ENSMUSG00000039116  | 0.47689767   | -1.06824836  | 0.00017702 | 0.00079444 | 65.2713691 | 588.436939 | 335.424499 | 213.1347925 | 243.2163707 | 298.7404521 | Adgrg6        |
| ENSMUSG00000041660  | 14.35728848  | 3.843711402  | 0.00017702 | 0.00079444 | 1.79321607 | 1.96473102 | 2.48462592 | 62.51953913 | 16.27826103 | 9.892067951 | Bbox1         |
| ENSMUSG00000024304  | 0.46446787   | -1.106349295 | 0.00017864 | 0.00080081 | 244.773994 | 147.354826 | 229.827897 | 119.3554838 | 84.26393945 | 85.07178438 | Cdh2          |
| ENSMUSG00000042807  | 0.475112687  | -1.073658364 | 0.0001787  | 0.00080088 | 259.119723 | 174.86106  | 146.592929 | 91.88477721 | 98.62711094 | 86.06099118 | Hecw2         |
| ENSMUSG00000043051  | 0.279882378  | -1.83710744  | 0.0001839  | 0.00082286 | 43.0371858 | 33.4004273 | 40.9963277 | 7.578125956 | 11.4905372  | 13.84889513 | Disc1         |
| ENSMUSG00000103881  | 0.055938298  | -4.160019832 | 0.00018428 | 0.00082433 | 13.4491206 | 12.7707516 | 43.4809536 | 0           | 1.915089533 | 1.97841359  | Gm10748       |
| ENSMUSG00000048521  | 0.209092201  | -2.257788842 | 0.0001852  | 0.00082801 | 45.7270099 | 119.848592 | 75.7810905 | 5.683594467 | 20.1084401  | 24.73016988 | Cxcr6         |
| ENSMUSG00000106732  | 0.218898189  | -2.191688074 | 0.00018534 | 0.00082842 | 23.311809  | 60.9066615 | 79.5080294 | 13.26172042 | 10.53299243 | 11.87048154 | Gm43792       |
| ENSMUSG00000037681  | 0.131385533  | -2.928121664 | 0.00018698 | 0.00083533 | 49.313442  | 21.6120412 | 23.6039462 | 6.630860211 | 4.787723832 | 0.989206795 | Eys23         |
| ENSMUSG000000023176 | 17.05300716  | 4.091954264  | 0.00018813 | 0.00083977 | 1.79321607 | 5.89419305 | 4.96925184 | 185.6640859 | 7.660358132 | 20.7733427  | Cpn2          |
| ENSMUSG00000043969  | 0.118980554  | -3.071202295 | 0.00018944 | 0.00084947 | 11.6559045 | 24.5591377 | 37.2693888 | 2.841797233 | 2.872634299 | 2.967620385 | Emx2          |
| ENSMUSG00000047197  | 0.128298404  | -2.962424877 | 0.00018982 | 0.00084619 | 24.208417  | 17.6825791 | 26.0885721 | 2.841797233 | 0.957544766 | 4.946033976 | Gj3d          |
| ENSMUSG00000041220  | 2.031581662  | 1.022603356  | 0.00018987 | 0.00084619 | 424.095602 | 230.855894 | 417.417154 | 853.4864358 | 582.187218  | 741.9050963 | Elovl6        |
| ENSMUSG00000074852  | 2.884471273  | 1.528306896  | 0.00019017 | 0.00084707 | 69.0388189 | 57.955649  | 22.3616333 | 136.4062672 | 131.183633  | 167.1759484 | Hps2          |
| ENSMUSG00000022686  | 2.41371756   | 1.27125687   | 0.00019091 | 0.00084991 | 98.6268841 | 77.6068751 | 73.2964646 | 292.705115  | 145.5468045 | 165.1975348 | B3gnt5        |
| ENSMUSG00000031458  | 0.473142032  | -1.079654766 | 0.00019134 | 0.00085164 | 127.318341 | 151.284288 | 206.223951 | 64.41407062 | 88.09411851 | 76.16892323 | Coprs         |
| ENSMUSG00000017146  | 0.386100241  | -1.372952641 | 0.00019211 | 0.00085458 | 72.625571  | 62.5425096 | 52.1771443 | 24.62890936 | 30.64143253 | 22.75175629 | Brc1          |
| ENSMUSG00000049598  | 0.135196012  | -2.8868755   | 0.00019342 | 0.00085882 | 14.3457286 | 47.1535444 | 31.057824  | 4.736328722 | 5.745268599 | 1.97841359  | Vsig8         |
| ENSMUSG00000026955  | 0.130984249  | -2.932534762 | 0.00019395 | 0.00086072 | 13.4491206 | 30.4533307 | 29.815511  | 4.736328722 | 2.872634299 | 1.97841359  | Sapcd2        |
| ENSMUSG00000015224  | 0.444178603  | -1.170788198 | 0.00019614 | 0.00086976 | 150.63015  | 102.166013 | 93.1734719 | 51.1523502  | 56.49514122 | 46.49271937 | Cyp2j9        |
| ENSMUSG00000074796  | 0.380636579  | -1.393513882 | 0.00019626 | 0.00086985 | 65.4523867 | 61.889027  | 49.6925184 | 20.83984638 | 20.1084401  | 26.70858347 | Slc4a11       |
| ENSMUSG000000078915 | 3.5924441633 | 1.844964717  | 0.00019751 | 0.0008749  | 10.7592964 | 11.7883861 | 11.1808166 | 48.31055297 | 44.04705926 | 28.68699706 | Hsp25-ps1     |
| ENSMUSG000000077391 | 11.40229123  | 3.511327764  | 0.00019791 | 0.00087644 | 1.79321607 | 2.94709652 | 0          | 17.99804914 | 18.19355056 | 20.7733427  | Gm24336       |
| ENSMUSG00000021536  | 0.461870856  | -1.114438579 | 0.00019874 | 0.00087966 | 261.809547 | 181.737619 | 139.139051 | 86.20118275 | 99.58465571 | 84.08257759 | Adcy2         |
| ENSMUSG000000050161 | 2.063436574  | 1.045049093  | 0.0001992  | 0.00088147 | 2413.66884 | 2888.15459 | 3323.18717 | 3448.994576 | 7302.236389 | 7044.141588 | Prdx2         |
| ENSMUSG000000003949 | 2.168710623  | 1.116837563  | 0.00020079 | 0.00088803 | 778.255776 | 606.119518 | 515.559878 | 1971.260014 | 1267.789271 | 883.3616681 | Hlf           |
| ENSMUSG00000046908  | 0.30940054   | -1.69245238  | 0.0002014  | 0.00089051 | 49.313442  | 58.9419305 | 34.7847629 | 13.26172042 | 13.40562673 | 17.80572231 | Ltb4r1        |
| ENSMUSG00000106464  | 2.223580525  | 1.152884651  | 0.00020274 | 0.00089596 | 84.2811555 | 55.9948339 | 42.7232665 | 135.4590015 | 151.2920731 | 127.6076766 | C130083M11Rik |
| ENSMUSG000000004961 | 0.172028896  | -2.59277182  | 0.00020313 | 0.0008972  | 28.6914572 | 23.5677722 | 26.0885721 | 2.841797233 | 7.660358132 | 2.967620385 | Syt5          |
| ENSMUSG00000020602  | 2.456298261  | 1.296485754  | 0.00020387 | 0.00089952 | 56.4863063 | 128.689881 | 69.5695257 | 186.6113517 | 196.2966771 | 243.3448716 | Slc9a2        |
| ENSMUSG00000034765  | 0.441778411  | -1.178605176 | 0.00020455 | 0.00090229 | 120.145477 | 205.314391 | 191.316196 | 87.14844849 | 83.3069468  | 57.37399412 | Dusp5         |
| ENSMUSG000000091957 | 3.212616243  | 1.683748657  | 0.00020531 | 0.00090516 | 15.2423366 | 9.82365508 | 13.6654426 | 38.83789552 | 42.13139727 | 43.52509899 | Rps2-ps10     |
| ENSMUSG00000085603  | 4.623551338  | 2.209001408  | 0.00020564 | 0.00090637 | 6.27625626 | 8.84128957 | 7.45387776 | 44.52148999 | 21.06598486 | 38.57906501 | Gm11346       |
| ENSMUSG00000057777  | 0.193515244  | -2.369480877 | 0.00020695 | 0.00091143 | 29.5880652 | 26.5238687 | 33.5424499 | 9.472657445 | 2.872634299 | 4.946033976 | Bml2112       |
| ENSMUSG00000030693  | 2.15427977   | 1.107205623  | 0.00020865 | 0.00091818 | 89.6680377 | 155.21375  | 103.111976 | 293.6523808 | 266.1974451 | 189.9277047 | Klk10         |
| ENSMUSG00000030041  | 0.292988849  | -1.771082337 | 0.00020955 | 0.00092165 | 33.1744974 | 54.0301029 | 58.3887091 | 10.41992319 | 16.27826103 | 15.82730872 | Mlap          |
| ENSMUSG00000027792  | 2.307488398  | 1.206323394  | 0.00021063 | 0.00092618 | 10.6262129 | 21.208584  | 198.770073 | 788.1250994 | 493.135547  | 628.1463149 | Bche          |
| ENSMUSG000000072612 | 3.661460607  | 1.872419274  | 0.00021162 | 0.00093029 | 28.6914572 | 25.5415032 | 7.45387776 | 66.30860211 | 95.75447664 | 67.26606207 | Gm10382       |
| ENSMUSG00000089636  | 2.945633564  | 1.55857797   | 0.00021177 | 0.00093072 | 58.2795224 | 34.3827928 | 18.6346944 | 116.5136866 | 107.2450138 | 107.8235407 | 1700058P15Rik |
| ENSMUSG00000078439  | 0.41767541   | -1.259545886 | 0.0002153  | 0.00094549 | 85.1777635 | 100.201282 | 139.139051 | 35.99609829 | 55.53796645 | 43.52509899 | Smin24        |
| ENSMUSG00000085218  | 2.979083702  | 1.574868659  | 0.00021782 | 0.00095603 | 18.8287688 | 16.7002136 | 11.1808166 | 45.46875573 | 46.91969356 | 48.47113296 | Bb128582      |
| ENSMUSG00000022416  | 39.24775028  | 5.294538055  | 0.00021826 | 0.00095771 | 0.89660804 | 2.94709652 | 0          | 133.56447   | 1.915089533 | 19.7841359  | Cacna1f       |
| ENSMUSG00000074912  | 0.309788601  | -1.690644034 | 0.00021933 | 0.00096215 | 46.6236179 | 34.3827928 | 53.4194572 | 12.31445468 | 12.44808196 | 16.81651552 | Gm14207       |
| ENSMUSG000000045411 | 0.405449572  | -1.302405605 | 0.00022136 | 0.00097058 | 123.731909 | 86.4481647 | 90.688846  | 54.94141318 | 32.55652206 | 34.62223783 | Gprn3         |
| ENSMUSG00000031448  | 0.143459007  | -2.801289545 | 0.00022259 | 0.00097757 | 14.3457286 | 101.183647 | 45.9655795 | 6.630860211 | 8.617902898 | 7.913654361 | Adprhl1       |
| ENSMUSG00000030519  | 0.287344334  | -1.799147492 | 0.00022343 | 0.00097914 | 60.9693465 | 55.9948339 | 58.3887091 | 7.578125956 | 18.19355056 | 24.73016988 | Apba2         |
| ENSMUSG00000036854  | 2.242748375  | 1.165267766  | 0.00022405 | 0.0009816  | 811.430274 | 1864.52973 | 802.534172 | 2650.449553 | 2638.035832 | 2514.563673 | Hspb6         |
| ENSMUSG00000030674  | 0.355809173  | -1.490824391 | 0.00022512 | 0.0009855  | 62.7625626 | 84.4834337 | 85.7195942 | 39.78516127 | 19.15089533 | 23.74096308 | Qprt          |
| ENSMUSG00000067870  | 2.425613617  | 1.278349758  | 0.00022585 | 0.00098792 | 35.8643215 | 42.2417168 | 49.6925184 | 71.99219658 | 112.0327377 | 124.6400562 | Rpl31-ps8     |
| ENSMUSG00000073705  | 2.211975158  | -2.238032894 | 0.00022637 | 0.00098995 | 23.311809  | 54.0301029 | 78.2657164 | 12.31445468 | 7.660358132 | 12.85968834 | Cenps         |
| ENSMUSG00000082186  | 28.80864446  | 4.48429873   | 0.00022937 | 0.001002   | 0          | 0.98236551 | 1.24231296 | 7.578125956 | 25.85730869 | 26.70858347 | Gm12403       |
| ENSMUSG00000101445  | 2.622591005  | 1.390992836  | 0.00023112 | 0.00100863 | 38.5541456 | 22.594067  | 34.7847629 | 69.15039935 | 75.64603655 | 106.8343339 | Gm28932       |
| ENSMUSG00000021298  | 0.270811339  | -1.884639947 | 0.00024018 | 0.00104515 | 102.213316 | 245.591377 | 208.708577 | 88.09571424 | 26.81125346 | 35.61144462 | Gpr132        |
| ENSMUSG00000029641  | 2.309961366  | 1.207688723  | 0.00024029 | 0.00104535 | 121.042085 | 94.3070887 | 147.835242 | 171.4550997 | 320.7774968 | 345.2331715 | Ras11a        |
| ENSMUSG00000035095  | 0.341888587  | -1.548401833 | 0.00024226 | 0.00105314 | 61.8659546 | 45.1888133 | 62.115648  | 25.5761751  | 14.3631715  | 17.80572231 | Fam167a       |
| ENSMUSG00000037577  | 0.281582809  | -1.828368835 | 0.00024373 | 0.00105885 | 54.6930903 | 55.0124684 | 33.5424499 | 9.472657445 | 19.15089533 | 11.87048154 | Ephx3         |
| ENSMUSG00000060019  | 3.417988243  | 1.773147435  | 0.0002456  | 0.00106655 | 40.3473617 | 111.007302 | 98.1427238 | 132.6172042 | 319.819952  | 398.6503384 | Gm10073       |
| ENSMUSG00000103932  | 0.238906089  | -2.06548447  | 0.00024849 | 0.00107854 | 81.5913314 | 197.455467 | 463.382734 | 53.04688169 | 79.47621561 | 44.51430578 | Gm36963       |
| ENSMUSG00000040522  | 0.266284502  | -1.908959622 | 0.00025356 | 0.00109912 | 156.906406 | 114.936764 | 62.115648  | 38.83789552 | 37.34424589 | 12.85968834 | Tlfr          |
| ENSMUSG00000110697  | 0.212909522  | -2.231687624 | 0.00025428 | 0.00110165 | 20.6219849 | 35.3651583 | 39.7540147 | 6.630860211 | 4.787723832 | 8.902861156 | Gm3           |

|                    |              |               |            |            |            |            |            |             |             |             |               |
|--------------------|--------------|---------------|------------|------------|------------|------------|------------|-------------|-------------|-------------|---------------|
| ENSMUSG00000022510 | 0.282030435  | -1.826077236  | 0.00027665 | 0.00118874 | 33.1744974 | 85.4657992 | 55.9040832 | 15.15625191 | 18.19335056 | 15.82730872 | Trp63         |
| ENSMUSG00000056531 | 3.377822589  | 1.756093556   | 0.00027691 | 0.00118959 | 27.7948491 | 34.3827928 | 58.3887091 | 64.41407062 | 182.8910504 | 157.2838804 | Ccdc18        |
| ENSMUSG00000027985 | 5.270841997  | 2.398033445   | 0.00027709 | 0.00118975 | 8.06947233 | 11.7883861 | 11.1808166 | 99.46290317 | 24.89616393 | 38.57906501 | Lcf1          |
| ENSMUSG00000058975 | 0.133263854  | -2.907642571  | 0.00027707 | 0.00118975 | 21.5185929 | 177.808157 | 45.9655795 | 8.5253917   | 17.2358058  | 6.924447566 | Kcnc1         |
| ENSMUSG00000074472 | 3.522227569  | 1.816488124   | 0.00027755 | 0.00119142 | 9.86268841 | 12.7707516 | 8.69619071 | 41.67969276 | 29.68388776 | 39.56827181 | Zfp872        |
| ENSMUSG00000079428 | 0.05600021   | -4.158423956  | 0.0002787  | 0.00119602 | 6.27625626 | 136.548806 | 79.5080294 | 2.841797233 | 9.575447664 | 0           | Tceal7        |
| ENSMUSG00000052563 | 0.476252983  | -1.070199966  | 0.00028096 | 0.00120544 | 130.767462 | 115.91913  | 105.596602 | 43.57422425 | 64.15549935 | 65.28764848 | D930048N14Rik |
| ENSMUSG00000097391 | 0.388981359  | -1.362227074  | 0.0002815  | 0.00120744 | 191.87412  | 196.473102 | 395.055521 | 71.04493083 | 130.2260882 | 102.8775067 | Mirg          |
| ENSMUSG00000055866 | 2.213513104  | 1.146337914   | 0.00028168 | 0.00120791 | 1821.01092 | 1045.2369  | 833.591996 | 3434.785589 | 2828.58724  | 1929.942457 | Per2          |
| ENSMUSG00000053412 | 4.865953412  | 2.282722508   | 0.00028336 | 0.00121449 | 18.8287688 | 2.94709652 | 9.93850367 | 49.25781871 | 44.04705926 | 62.32002809 | Gm42635       |
| ENSMUSG00000022340 | 0.416809155  | -1.26254113   | 0.00028516 | 0.00122157 | 92.3506278 | 76.3245096 | 65.8425868 | 40.73242701 | 30.64143253 | 26.70858347 | Sybu          |
| ENSMUSG00000022504 | 0.323650768  | -1.627490169  | 0.00029082 | 0.00124456 | 290.501004 | 497.076947 | 265.854973 | 189.4531489 | 54.58005169 | 96.94226592 | Ciita         |
| ENSMUSG00000092486 | 0.430876378  | -1.214654087  | 0.00029217 | 0.00124938 | 118.352261 | 139.495902 | 178.893066 | 55.88867892 | 45.96214879 | 86.06099118 | 2610524H06Rik |
| ENSMUSG00000099906 | 0.06895678   | -3.858163775  | 0.00029404 | 0.00125671 | 10.7592964 | 44.2064478 | 42.2386406 | 5.683594467 | 0.957544766 | 0           | Gm28653       |
| ENSMUSG00000026080 | 2.740481194  | 1.454429235   | 0.00029532 | 0.00126186 | 43.9337938 | 28.4885997 | 21.1193203 | 109.8828264 | 73.73094702 | 75.17971643 | Chst10        |
| ENSMUSG00000029053 | 0.461944746  | -1.114207796  | 0.00029806 | 0.00127292 | 209.806281 | 186.649446 | 118.019731 | 86.20118275 | 64.15549935 | 88.03940477 | Prkc2         |
| ENSMUSG00000048852 | 0.211860873  | -2.238810924  | 0.00029861 | 0.00127496 | 42.1405777 | 134.584075 | 42.2386406 | 9.472657445 | 17.2358058  | 99.7841359  | Gm12185       |
| ENSMUSG00000100183 | 9.274373467  | 3.213249823   | 0.00030172 | 0.00128725 | 9.86268841 | 5.89419305 | 0          | 17.99804914 | 55.53759645 | 77.15813002 | Gm28512       |
| ENSMUSG00000032113 | 0.130800936  | -1.685937248  | 0.00030617 | 0.00130393 | 55.5896983 | 63.853758  | 58.3887091 | 12.31445468 | 13.40562671 | 29.67620385 | Chek1         |
| ENSMUSG00000021991 | 2.505480906  | 1.327423462   | 0.00030984 | 0.00131753 | 34.0711054 | 36.3472538 | 22.3616333 | 60.62500765 | 90.96675281 | 83.09337079 | Cacna2d3      |
| ENSMUSG00000034792 | 0.306430274  | -1.706369261  | 0.000311   | 0.00132214 | 40.3473617 | 107.07784  | 89.4465331 | 19.89258063 | 25.85370869 | 26.70858347 | Gna15         |
| ENSMUSG00000103882 | 0.258318934  | -1.952774701  | 0.00031162 | 0.00132445 | 47.520226  | 173.878695 | 219.889394 | 32.20703531 | 46.91969356 | 34.62223783 | Gm37452       |
| ENSMUSG00000024912 | 2.464604895  | 1.301356384   | 0.00031202 | 0.00132545 | 57.3829144 | 39.2946203 | 52.1771443 | 142.0898617 | 146.5043493 | 78.14733682 | Fos1          |
| ENSMUSG00000048534 | 0.290902041  | -1.781394677  | 0.00031289 | 0.00132851 | 69.0388189 | 134.584075 | 113.050479 | 37.89062978 | 41.17442496 | 12.85968834 | Jaml          |
| ENSMUSG00000074497 | 6.702671254  | 2.744736176   | 0.0003138  | 0.00133201 | 12.5525125 | 9.82365508 | 6.2115648  | 133.56447   | 21.06598486 | 38.57906501 | A430078G23Rik |
| ENSMUSG00000100755 | 2.934007564  | 1.552872591   | 0.00031503 | 0.00133691 | 26.8982411 | 28.4885997 | 40.9963277 | 54.94141318 | 97.66956618 | 128.5968834 | Rps23-ps1     |
| ENSMUSG00000084866 | 4.032510966  | 2.011678457   | 0.00031999 | 0.00135728 | 17.0355527 | 23.5767722 | 13.6654426 | 30.31250382 | 101.4997452 | 88.03940477 | A930006K02Rik |
| ENSMUSG00000043510 | 2.133952366  | 1.093527973   | 0.00032098 | 0.00136077 | 172.148743 | 217.102777 | 154.046807 | 251.972688  | 525.6920768 | 382.8320297 | Hscb          |
| ENSMUSG00000028864 | 0.300381868  | -1.735130363  | 0.00032116 | 0.00136084 | 450.993843 | 33.737192  | 127.958235 | 70.09766509 | 79.47621561 | 69.24447566 | Hgb           |
| ENSMUSG00000040165 | 0.176203289  | -2.504687238  | 0.00032356 | 0.00137    | 29.5880652 | 17.6825791 | 34.7847629 | 7.578125956 | 3.830179066 | 2.967620385 | Cd209c        |
| ENSMUSG00000055805 | 0.334202463  | -1.581205729  | 0.00032474 | 0.00137392 | 440.234546 | 650.325966 | 406.236338 | 292.705115  | 128.3109987 | 79.13654361 | Fmnl1         |
| ENSMUSG00000050232 | 0.235164617  | -2.08825709   | 0.00033113 | 0.00140061 | 43.9337938 | 76.3245096 | 38.5117017 | 11.36718893 | 20.1084407  | 5.935240771 | Cxcr3         |
| ENSMUSG00000020173 | 2.149717254  | 1.104146919   | 0.00033227 | 0.00140474 | 126.421733 | 266.221053 | 136.654426 | 395.0098154 | 360.0368322 | 383.8122365 | Cobl          |
| ENSMUSG00000030125 | 0.21306666   | -2.230623233  | 0.00033297 | 0.00140735 | 34.9677134 | 22.5944067 | 28.5731981 | 5.683594467 | 3.830179066 | 8.902861156 | Lrrc23        |
| ENSMUSG00000047986 | 0.285983024  | -1.805998585  | 0.00033786 | 0.00142623 | 37.6575376 | 41.2593513 | 73.2964646 | 18.94531489 | 13.40562671 | 10.88127475 | Paln3         |
| ENSMUSG00000051727 | 0.284443893  | -1.813783988  | 0.00034377 | 0.00144788 | 28.6914572 | 32.4180617 | 40.9963277 | 9.472657445 | 10.53299243 | 8.902861156 | Kctd14        |
| ENSMUSG00000025227 | 0.382315064  | -1.387166049  | 0.00034763 | 0.00146306 | 51.1066581 | 85.4657992 | 80.7503423 | 33.15430106 | 22.9810739  | 26.70858347 | Mfsd13a       |
| ENSMUSG00000026027 | 2.064440895  | 1.045751115   | 0.00034825 | 0.0014653  | 355.953391 | 532.442105 | 280.762729 | 619.5117969 | 1050.426609 | 745.8619235 | Strad3        |
| ENSMUSG00000020848 | 0.47668529   | -1.068890989  | 0.00034987 | 0.00147172 | 201.736808 | 144.40773  | 140.381364 | 62.51953913 | 99.58465571 | 70.23368245 | Doc2b         |
| ENSMUSG00000030854 | 0.049251619  | -4.343685055  | 0.0003501  | 0.00147234 | 12.5525125 | 18.6649446 | 47.2078925 | 0           | 3.830179066 | 0           | Ptpn5         |
| ENSMUSG00000097350 | 2.208610851  | 1.143139244   | 0.00035178 | 0.00147904 | 35.8643215 | 37.3299486 | 34.7847629 | 71.04493083 | 71.81585748 | 95.95305913 | 4732491K20Rik |
| ENSMUSG00000049687 | 0.442727288  | -1.175509797  | 0.0003564  | 0.00149619 | 179.321607 | 166.019771 | 248.462592 | 57.78321041 | 87.13657375 | 117.7156086 | Fam109b       |
| ENSMUSG00000014782 | 0.15140935   | -2.723473796  | 0.0003583  | 0.00150304 | 19.7253768 | 14.7354826 | 36.0270758 | 3.789062978 | 3.830179066 | 2.967620385 | Plekhd4       |
| ENSMUSG00000035456 | 0.192435355  | -2.377554213  | 0.00036141 | 0.00151384 | 26.0016331 | 41.2593513 | 33.5424499 | 1.894531489 | 7.660358132 | 9.892067951 | Pdm8          |
| ENSMUSG00000107585 | 0.037352876  | -4.742636874  | 0.00036713 | 0.00153624 | 6.27625626 | 46.1711789 | 24.8462592 | 0           | 2.872634299 | 0           | 3300002P13Rik |
| ENSMUSG00000091089 | 0.123301636  | -0.3019736155 | 0.00036972 | 0.00154669 | 48.416834  | 116.901495 | 13.6654426 | 4.736328722 | 13.40562673 | 3.956827181 | Nrc           |
| ENSMUSG00000046345 | 0.060107073  | -4.056312426  | 0.00037043 | 0.00154928 | 9.86268841 | 153.249019 | 28.5731981 | 0.947265744 | 9.575447664 | 0.989206795 | Smc01         |
| ENSMUSG00000030149 | 0.371620288  | -1.428098831  | 0.00037378 | 0.00156253 | 72.625251  | 191.561274 | 151.562181 | 50.20508446 | 53.62250692 | 50.44954655 | Klrk1         |
| ENSMUSG00000022586 | 0.154645006  | -2.692967852  | 0.00037864 | 0.00158005 | 14.3457286 | 80.5539716 | 36.0270758 | 5.683594467 | 8.617902898 | 5.935240771 | Ly6i          |
| ENSMUSG00000024354 | 3.56396207   | 1.833481983   | 0.00037873 | 0.00158005 | 10.7592964 | 8.84128957 | 12.4231296 | 50.20508446 | 31.59897729 | 31.65461744 | Sic23a1       |
| ENSMUSG00000037735 | 0.295878526  | -1.756923099  | 0.00037928 | 0.00158198 | 32.2778893 | 34.3827928 | 31.057824  | 9.472657445 | 9.575447664 | 9.892067951 | 2100323G03Rik |
| ENSMUSG00000051515 | 0.275977831  | -1.857375714  | 0.00038117 | 0.00158912 | 25.105025  | 39.2946203 | 37.2693888 | 9.472657445 | 8.617902898 | 9.892067951 | Fam181b       |
| ENSMUSG00000063388 | 0.137289601  | -2.864705746  | 0.00038201 | 0.00159215 | 78.9015073 | 338.9161   | 38.5117017 | 7.578125956 | 38.30179066 | 16.81651552 | BC023105      |
| ENSMUSG00000026834 | 0.447722759  | -1.159322438  | 0.00038353 | 0.00159772 | 115.129521 | 176.825791 | 331.69756  | 132.6172042 | 148.4194388 | 132.5531705 | Acr1c         |
| ENSMUSG00000074657 | 0.472644242  | -1.081173414  | 0.00038705 | 0.00161129 | 206.219849 | 156.196116 | 125.473609 | 69.15039935 | 96.71202141 | 65.28764848 | Kif5a         |
| ENSMUSG00000086602 | 0.36919932   | -1.437528198  | 0.00038708 | 0.00161129 | 48.416834  | 46.1711789 | 54.6617702 | 14.20898617 | 22.02352963 | 18.79492911 | Gm15609       |
| ENSMUSG00000057346 | 0.291306338  | -1.779379636  | 0.00038937 | 0.00162004 | 39.4507536 | 120.830957 | 125.473609 | 27.47070659 | 24.89616393 | 30.66541065 | Apola9        |
| ENSMUSG00000104125 | 16.60409846  | 4.053467487   | 0.00038947 | 0.00162005 | 3.58643215 | 0          | 0          | 29.36523808 | 13.40562673 | 21.76254949 | Gm37488       |
| ENSMUSG00000034156 | 0.219281428  | -2.189144467  | 0.00040117 | 0.00166375 | 26.0016331 | 32.4180617 | 29.815511  | 2.841797233 | 8.617902898 | 7.913654361 | Tspoap1       |
| ENSMUSG00000021815 | 0.201450071  | -2.311505783  | 0.00040553 | 0.0016806  | 65.4523867 | 525.565547 | 159.016059 | 40.73242701 | 72.77340225 | 73.58985821 | Mcs51         |
| ENSMUSG00000071324 | 2.413999487  | 1.27142537    | 0.00040653 | 0.00168432 | 40.3473617 | 32.4180617 | 31.057824  | 67.25586786 | 110.1176481 | 74.19050963 | Armec2        |
| ENSMUSG00000102153 | 0.274939888  | -1.862811867  | 0.00041009 | 0.00169782 | 71.728643  | 215.138046 | 300.639736 | 64.41407062 | 65.11304412 | 31.65461744 | Gm37474       |
| ENSMUSG00000050578 | 0.113206581  | -3.142970265  | 0.00041193 | 0.00170501 | 17.9321607 | 240.679549 | 224.858646 | 9.472657445 | 39.25933542 | 5.935240771 | Mmp13         |
| ENSMUSG00000109625 | 0.155055618  | -2.689142294  | 0.00041212 | 0.00170539 | 17.0355527 | 38.3122548 | 50.9348313 | 1.894531489 | 9.575447664 | 4.946033976 | 3110080E11Rik |
| ENSMUSG00000034923 | 14.6158354   | 3.869460386   | 0.00041632 | 0.00172107 | 0          | 5.89419305 | 1.24231296 | 20.83984638 | 68.94322318 | 14.83810193 | Ly6gf6        |
| ENSMUSG00000030088 | 0.4672123025 | -1.097847599  | 0.000417   | 0.00172345 | 702.940701 | 353.651583 | 618.671854 | 344.804731  | 224.0654753 | 213.6686677 | Aldh1f1       |

|                     |             |               |            |            |            |            |             |             |              |             |           |
|---------------------|-------------|---------------|------------|------------|------------|------------|-------------|-------------|--------------|-------------|-----------|
| ENSMUSG00000025190  | 0.450559403 | -1.150210768  | 0.00046777 | 0.00190977 | 386.438064 | 976.471315 | 581.402465  | 313.5449614 | 314.0746834  | 248.2909056 | Got1      |
| ENSMUSG00000031286  | 2.638402484 | 1.399664662   | 0.00047542 | 0.0019377  | 26.0016331 | 54.0301029 | 40.9963277  | 87.14844849 | 88.09411851  | 143.4349853 | GlT28d2   |
| ENSMUSG00000053399  | 0.309713653 | -1.690993112  | 0.00048526 | 0.00197446 | 53.7964822 | 62.8713925 | 52.1771443  | 15.15625191 | 9.575447664  | 27.69779026 | Adams18   |
| ENSMUSG00000063681  | 0.362159762 | -1.465301832  | 0.00048661 | 0.00197919 | 49.313442  | 112.972033 | 88.2042201  | 30.31250382 | 33.51406683  | 26.70858347 | P2ry14    |
| ENSMUSG00000024268  | 0.329580016 | -1.601299329  | 0.00048834 | 0.00198412 | 43.9337938 | 91.3599922 | 101.869663  | 33.15430106 | 24.89616393  | 19.7841359  | Celf4     |
| ENSMUSG00000026525  | 0.401563125 | -1.3163013    | 0.00048813 | 0.00198412 | 100.4201   | 68.7655855 | 91.931159   | 34.1015668  | 46.91969356  | 23.74096308 | Opn3      |
| ENSMUSG00000017436  | 0.265739115 | -1.911917496  | 0.0004995  | 0.00202697 | 31.3812133 | 93.3247232 | 126.715922  | 20.83984638 | 22.98107439  | 25.75175629 | Gm44416   |
| ENSMUSG00000039699  | 0.275527281 | -1.859732924  | 0.00050099 | 0.00203205 | 36.7609295 | 106.095475 | 57.1463961  | 17.99804914 | 13.40562673  | 23.74096308 | Batf2     |
| ENSMUSG00000022860  | 0.181655895 | -2.460719914  | 0.00050148 | 0.00203356 | 39.4507536 | 31.4356962 | 18.6346944  | 9.472657445 | 2.872634299  | 3.956827181 | Chodl     |
| ENSMUSG00000032523  | 0.132646349 | -2.914343124  | 0.00050284 | 0.00203857 | 42.1405777 | 437.152651 | 93.1734719  | 11.36718893 | 51.70741739  | 12.85968834 | Hhatl     |
| ENSMUSG00000085636  | 0.231353869 | -2.111826868  | 0.00050344 | 0.00204    | 22.4152009 | 28.4885997 | 49.6925184  | 7.578125956 | 9.575447664  | 5.935240771 | Gm11769   |
| ENSMUSG00000028078  | 0.466513393 | -1.100009595  | 0.00050462 | 0.00204383 | 230.428266 | 157.178481 | 116.777418  | 83.35938551 | 80.43376038  | 72.21209604 | Dck2      |
| ENSMUSG00000036169  | 0.303252989 | -1.721406231  | 0.00050505 | 0.00204504 | 76.2456028 | 103.148378 | 45.9655795  | 12.31445468 | 26.81125346  | 26.70858347 | Sostdc1   |
| ENSMUSG00000054065  | 0.210673653 | -2.246918192  | 0.00051096 | 0.00206748 | 29.5880652 | 54.0301029 | 34.7847629  | 15.15625191 | 4.946033976  | Pkp3        |           |
| ENSMUSG00000031558  | 0.478144858 | -1.064480334  | 0.00052028 | 0.00210217 | 848.191203 | 409.646417 | 414.932528  | 258.6035482 | 270.9851689  | 271.0426619 | Slit2     |
| ENSMUSG00000030154  | 0.278675609 | -1.843341358  | 0.00052213 | 0.0021081  | 49.313442  | 38.3122548 | 29.815511   | 11.36718893 | 6.702813365  | 14.83810193 | Klr1b1f   |
| ENSMUSG00000080115  | 0.261615011 | -1.93448277   | 0.00052774 | 0.00212975 | 42.1405777 | 30.4533307 | 64.6002739  | 6.60860211  | 16.27826103  | 12.85968834 | Mettl21b  |
| ENSMUSG00000052135  | 2.639814186 | 1.400436383   | 0.00053217 | 0.00214608 | 34.9671734 | 45.1888133 | 21.1193203  | 101.3574347 | 64.15549935  | 103.8667135 | Foxo6     |
| ENSMUSG00000019027  | 0.233947557 | -2.095742929  | 0.00053336 | 0.00214984 | 68.1422108 | 31.4356962 | 52.1771443  | 11.36718893 | 19.1508953   | 4.946033976 | Dnah1     |
| ENSMUSG00000006731  | 0.381530944 | -1.390128023  | 0.00053797 | 0.00216684 | 440.234546 | 571.736725 | 631.094983  | 363.7500459 | 130.2260882  | 132.5537105 | G4galnt1  |
| ENSMUSG00000027454  | 0.377942609 | -1.403760918  | 0.00053793 | 0.00216684 | 49.313442  | 66.8008545 | 94.4157849  | 21.78711212 | 28.72634299  | 28.68699706 | Gins1     |
| ENSMUSG00000058806  | 2.203857508 | 1.140030948   | 0.00054304 | 0.00218518 | 340.711054 | 252.467935 | 126.715922  | 484.0527954 | 569.739136   | 537.1392898 | Col13a1   |
| ENSMUSG00000029206  | 0.282982969 | -1.821212868  | 0.0005438  | 0.00218771 | 43.9371858 | 30.4533307 | 49.6925184  | 6.630860211 | 15.32071626  | 12.85968834 | Nsun7     |
| ENSMUSG00000109751  | 0.214925883 | -2.218088859  | 0.00055132 | 0.00221479 | 30.4846733 | 128.689881 | 208.708577  | 24.62890936 | 35.42915636  | 18.79492911 | Gm45479   |
| ENSMUSG00000107336  | 0.313803888 | -1.672064866  | 0.00055207 | 0.00221672 | 35.8643215 | 59.924296  | 89.4465331  | 17.99804914 | 22.98107439  | 16.81651552 | Gm43461   |
| ENSMUSG00000104324  | 2.701459458 | 1.433739031   | 0.00055312 | 0.00222042 | 16.1389447 | 22.5944067 | 16.1500685  | 41.67969276 | 56.49514122  | 50.44954655 | Gm37320   |
| ENSMUSG00000053101  | 0.329914896 | -1.599834178  | 0.00055504 | 0.0022276  | 59.1761304 | 100.201282 | 80.7503423  | 14.20898617 | 39.25933542  | 25.71937667 | Gpr141    |
| ENSMUSG00000026616  | 6.367805702 | 2.670796295   | 0.00055542 | 0.00222857 | 6.27625626 | 10.8606206 | 9.93850367  | 117.4609523 | 17.2358058   | 36.60065142 | Cr2       |
| ENSMUSG00000076609  | 0.191715701 | -2.382959604  | 0.00055567 | 0.00222905 | 208.51029  | 5646.63694 | 3227.52907  | 1297.75407  | 416.5319734  | 386.7798569 | Igkc      |
| ENSMUSG00000020908  | 0.118264031 | -3.079916737  | 0.00056078 | 0.00224805 | 18.8287688 | 59.924296  | 131.685174  | 15.15625191 | 8.617902898  | 0.989206795 | Myh3      |
| ENSMUSG00000023036  | 0.353766354 | -1.499131251  | 0.00056341 | 0.00225688 | 58.2795224 | 72.6950476 | 137.896738  | 27.47070659 | 31.59897729  | 35.61144442 | Pcdhgc4   |
| ENSMUSG00000062353  | 3.074080629 | 1.620155005   | 0.00057102 | 0.00228573 | 11.6559025 | 10.8606206 | 18.6346944  | 36.94336403 | 39.25933542  | 48.47113296 | Gm15772   |
| ENSMUSG00000038508  | 0.366967216 | -1.446276914  | 0.00057422 | 0.00229523 | 40.3473617 | 58.9419305 | 55.9040832  | 23.68164361 | 16.27826103  | 16.81651552 | Gdf15     |
| ENSMUSG00000031962  | 0.037582942 | -4.733778167  | 0.00057471 | 0.00229664 | 6.27625626 | 53.0477374 | 17.3923814  | 0           | 2.872634299  | 0           | Cdh15     |
| ENSMUSG00000030433  | 0.11497628  | -3.120591832  | 0.00057631 | 0.00230194 | 13.4491206 | 156.196116 | 31.057824   | 5.683594467 | 12.44808196  | 9.446033976 | Sbk2      |
| ENSMUSG00000104871  | 2.254391655 | 1.172738176   | 0.00057851 | 0.0023102  | 134.491206 | 273.097611 | 386.35933   | 572.1485097 | 608.0409267  | 605.3945586 | Gm42639   |
| ENSMUSG00000067599  | 0.066001088 | -1.9321366375 | 0.00057918 | 0.00231232 | 10.7592964 | 34.3827928 | 13.6654426  | 0           | 0.957544766  | 2.967620385 | Kira7     |
| ENSMUSG00000072082  | 0.291451326 | -1.778673129  | 0.00057941 | 0.00231266 | 81.5913134 | 96.2718197 | 115.53105   | 9.472657445 | 33.51406683  | 42.53589219 | Ccnf      |
| ENSMUSG00000102850  | 13.95932376 | 3.803157149   | 0.0005799  | 0.00231407 | 0.89660804 | 0.98236551 | 3.72693888  | 52.09961595 | 9.575447664  | 12.85968834 | Gm37082   |
| ENSMUSG00000105541  | 3.151541866 | 1.656057828   | 0.00058172 | 0.0023197  | 9.86268841 | 11.7883861 | 11.1808166  | 31.25976957 | 36.38670112  | 35.61144442 | Gm31336   |
| ENSMUSG00000052861  | 0.281546637 | -1.828554178  | 0.00058424 | 0.00232753 | 28.6914572 | 31.4356962 | 32.3001369  | 11.36718893 | 7.660358132  | 6.924447566 | Dnah6     |
| ENSMUSG00000076490  | 0.376125312 | -1.410714697  | 0.00058753 | 0.00233895 | 52.8998742 | 115.91913  | 88.2042201  | 33.15430106 | 26.81125346  | 36.60065142 | Trbc1     |
| ENSMUSG00000103916  | 0.288804825 | -1.79183325   | 0.00059276 | 0.00235923 | 41.2439697 | 54.0301029 | 119.262044  | 20.83984638 | 23.93861916  | 16.81651552 | Gm38071   |
| ENSMUSG00000043531  | 0.255964098 | -1.965986628  | 0.00059385 | 0.00236301 | 15.5896983 | 37.3298893 | 27.3308851  | 5.683594467 | 13.40562673  | 11.87048154 | Sorcs1    |
| ENSMUSG00000040264  | 0.070044017 | -3.835594366  | 0.00059462 | 0.0023644  | 7.1728643  | 117.883861 | 38.5117017  | 6.630860211 | 4.787723832  | 0           | Gbp2b     |
| ENSMUSG00000060419  | 2.196193855 | 1.135005405   | 0.0006077  | 0.00241299 | 76.2116831 | 108.060206 | 155.28912   | 195.1367434 | 227.8956544  | 319.5137948 | Rps16-ps2 |
| ENSMUSG00000022118  | 0.266168524 | -1.805063099  | 0.00060819 | 0.00241443 | 35.2651853 | 45.9655795 | 13.26172042 | 8.617902898 | 9.02861156   | Tgm1        |           |
| ENSMUSG00000000682  | 0.456950788 | -1.129889293  | 0.00061414 | 0.00243453 | 511.963189 | 1325.21107 | 1049.75445  | 465.1074805 | 357.1641979  | 496.5818112 | Cd52      |
| ENSMUSG00000011673  | 2.623388458 | 1.39143145    | 0.00061834 | 0.00244943 | 15.2423366 | 16.7002136 | 19.8770073  | 43.57422425 | 45.96214879  | 45.50351258 | Gm29724   |
| ENSMUSG00000040658  | 0.218214923 | -2.196178326  | 0.00062351 | 0.002467   | 17.9321607 | 43.2240823 | 27.3308851  | 6.630860211 | 5.745268599  | 6.924447566 | Dnph1     |
| ENSMUSG00000046480  | 0.252749467 | -1.984220047  | 0.00062446 | 0.00247016 | 186.494472 | 886.093688 | 241.008714  | 60.62500765 | 166.61127894 | 104.8559203 | Scn4b     |
| ENSMUSG00000059412  | 0.415085041 | -1.268521153  | 0.00062612 | 0.00247559 | 69.9354269 | 56.9771994 | 83.2349683  | 22.73437787 | 27.76879823  | 36.60065142 | Fxyd2     |
| ENSMUSG00000028133  | 0.456600994 | -1.130994095  | 0.00062807 | 0.00248268 | 83.3845474 | 60.9066615 | 90.688846   | 36.94336403 | 32.55652206  | 37.58985821 | Rwd3      |
| ENSMUSG00000001334  | 0.275005039 | -2.268813011  | 0.00063112 | 0.00249297 | 28.6914572 | 138.513537 | 105.596602  | 25.5761751  | 22.98107439  | 7.913654361 | Fndc5     |
| ENSMUSG00000070323  | 0.338323588 | -1.563524331  | 0.00063518 | 0.00250666 | 57.3829144 | 40.2769858 | 47.2078925  | 16.10351766 | 22.02352963  | 10.88127475 | Mmp27     |
| ENSMUSG000000052143 | 3.396331412 | 1.763977243   | 0.00063872 | 0.0025177  | 17.0355527 | 22.5944067 | 6.2115648   | 59.6777419  | 44.04750926  | 54.40637373 | Gm9869    |
| ENSMUSG00000025089  | 0.418921878 | -1.255246865  | 0.00064116 | 0.00252671 | 168.562311 | 131.636978 | 112.272792  | 86.20118275 | 43.08951449  | 44.51430578 | Gfra1     |
| ENSMUSG00000022945  | 0.427358838 | -1.226480137  | 0.00064307 | 0.00253135 | 85.1777635 | 59.924296  | 67.0848998  | 26.52344084 | 26.81125346  | 37.58985821 | Chaf1b    |
| ENSMUSG00000054934  | 0.197596895 | -2.339367821  | 0.0006427  | 0.00253135 | 31.3812813 | 16.7002136 | 39.7540147  | 7.578125956 | 6.702813365  | 2.967620385 | Kcnmb4    |
| ENSMUSG00000062044  | 2.302839192 | 1.203413671   | 0.00064325 | 0.00253135 | 43.9337938 | 28.4885997 | 34.7847629  | 72.93946232 | 71.81585748  | 102.8775067 | Lmtk3     |
| ENSMUSG00000073565  | 0.418355709 | -1.257197973  | 0.00064525 | 0.00253864 | 118.352261 | 67.78322   | 73.2964646  | 41.67969276 | 33.51406683  | 33.63303103 | Prr16     |
| ENSMUSG00000006435  | 0.226929688 | -2.139682735  | 0.00064544 | 0.0025388  | 87.8675876 | 641.484676 | 212.435516  | 52.09961595 | 108.2025586  | 53.41716694 | Neurl1a   |
| ENSMUSG00000032452  | 0.34023103  | -1.555413372  | 0.00064745 | 0.00254494 | 74.4184671 | 34.3827928 | 67.0848998  | 19.89258063 | 19.15089533  | 20.7733427  | C1stn2    |
| ENSMUSG00000060467  | 2.648208876 | 1.405016918   | 0.00064958 | 0.00255268 | 16.1389447 | 22.5944067 | 24.8462592  | 42.6269585  | 62.24040982  | 62.32002809 | Gm10080   |
| ENSMUSG00000103251  | 0.251806025 | -1.989615289  | 0.00065411 | 0.00256748 | 26.0016331 | 65.818489  | 108.081227  | 17.0507834  | 18.19335056  | 14.83810193 | Gm37519   |
| ENSMUSG00000044086  | 0.186226048 | -2.424873215  | 0.00065668 | 0.00257697 | 48.416834  | 451.888133 | 127.958235  | 19.89258063 | 53.62250692  | 43.52509899 | Lmod3     |
| ENSMUSG00000028125  | 0.24051104  |               |            |            |            |            |             |             |              |             |           |

|                     |              |              |            |            |            |            |            |             |             |             |               |
|---------------------|--------------|--------------|------------|------------|------------|------------|------------|-------------|-------------|-------------|---------------|
| ENSMUSG00000038459  | 0.49171946   | -1.024092642 | 0.00074055 | 0.00287053 | 219.668969 | 294.709652 | 432.32491  | 177.1386942 | 165.6552446 | 121.6724358 | Abhd17c       |
| ENSMUSG00000037601  | 0.473581763  | -1.078314568 | 0.00074126 | 0.00287261 | 411.543089 | 726.950476 | 1049.75445 | 323.0176189 | 386.8480856 | 325.4490356 | Nme1          |
| ENSMUSG000000074001 | 0.154938636  | -2.690231148 | 0.00074414 | 0.00288244 | 29.5880652 | 348.739755 | 141.623677 | 21.78711212 | 48.83478309 | 9.892067951 | Khlh40        |
| ENSMUSG000000005470 | 0.386792369  | -1.370368762 | 0.00074935 | 0.00290062 | 51.1066581 | 86.4481647 | 74.5387776 | 22.73437787 | 36.38670112 | 22.75176299 | Asf1b         |
| ENSMUSG000000031444 | 0.178994432  | -2.482013388 | 0.00075355 | 0.00291553 | 78.9015073 | 249.520839 | 124.231296 | 56.83594467 | 19.15089533 | 4.946033976 | F10           |
| ENSMUSG000000092074 | 0.243389614  | -2.038660486 | 0.00075743 | 0.00292851 | 34.0711054 | 29.4709652 | 31.057824  | 10.41992319 | 9.575447664 | 2.967620385 | Dynl11a       |
| ENSMUSG000000034551 | 0.327006369  | -1.61260936  | 0.00075853 | 0.00293212 | 56.4863063 | 31.4356962 | 44.7232665 | 11.36718893 | 17.2358058  | 14.83810193 | Hdx           |
| ENSMUSG000000041046 | 0.215578143  | -2.213717179 | 0.00075901 | 0.00293329 | 16.1389447 | 39.2946203 | 29.815511  | 6.630860211 | 4.787723832 | 6.924447566 | Ramp3         |
| ENSMUSG000000022372 | 0.448577375  | -1.156571239 | 0.00076142 | 0.00294124 | 327.261934 | 471.535444 | 280.762729 | 233.9746389 | 146.5043493 | 103.8667135 | Sla           |
| ENSMUSG000000061414 | 0.375441116  | -1.413341441 | 0.00076843 | 0.00296558 | 254.636683 | 132.619344 | 93.1734719 | 68.2031336  | 65.11304412 | 47.48192617 | Cracr2a       |
| ENSMUSG000000013974 | 0.238016928  | -2.107086391 | 0.00076994 | 0.00297072 | 37.6575376 | 124.760419 | 67.0848998 | 27.47070659 | 19.15089533 | 7.913654361 | Memc1p        |
| ENSMUSG000000026815 | 4.697652954  | 2.231940136  | 0.00077165 | 0.00297663 | 5.37964822 | 5.89419305 | 6.2115648  | 19.89258063 | 41.17442496 | 20.7733427  | Gf1p          |
| ENSMUSG000000027173 | 0.379771833  | -1.396795186 | 0.00077823 | 0.00298562 | 45.7270099 | 45.1888133 | 45.9655795 | 21.78711212 | 16.27862103 | 13.84889513 | Depdc7        |
| ENSMUSG000000043740 | 0.317405853  | -1.655599362 | 0.00077937 | 0.00300161 | 54.6930903 | 139.459502 | 132.927487 | 49.25781871 | 33.51406683 | 20.7733427  | B430306N03Rik |
| ENSMUSG000000026979 | 0.281271689  | -1.829963748 | 0.0007812  | 0.00300796 | 200.8402   | 310.4275   | 239.766401 | 143.0371274 | 35.42915636 | 32.64382424 | Psd4          |
| ENSMUSG000000042549 | 0.2273003158 | 1.184599689  | 0.00079912 | 0.0030713  | 26.8982411 | 46.1711789 | 34.7847629 | 73.88672807 | 96.71202141 | 74.19050963 | Map2k3os      |
| ENSMUSG000000029212 | 0.264890568  | -1.916531619 | 0.00080808 | 0.00310007 | 42.1405777 | 24.5591377 | 45.9655795 | 14.20898617 | 9.575447664 | 5.93524771  | Gabrb1        |
| ENSMUSG000000024600 | 0.087163623  | -3.520130021 | 0.0008198  | 0.00314074 | 31.3812813 | 27.5062342 | 7.45387776 | 0           | 2.872634299 | 2.967620385 | Slc27a6       |
| ENSMUSG000000097585 | 0.297383811  | -1.749601983 | 0.00082043 | 0.00314242 | 38.5541456 | 38.3122548 | 89.4465331 | 18.94531489 | 14.3631715  | 15.82730872 | E230029C05Rik |
| ENSMUSG00000102243  | 0.23592723   | -2.145907151 | 0.00082804 | 0.00316798 | 17.9321607 | 51.0830064 | 77.0234035 | 9.472657445 | 11.4905372  | 11.87048154 | Gm37718       |
| ENSMUSG000000024675 | 0.310805568  | -1.685915744 | 0.00082914 | 0.00317145 | 110.282789 | 507.882967 | 326.728308 | 79.57032253 | 77.56112608 | 136.5105377 | Msa44c        |
| ENSMUSG000000029158 | 0.063419638  | -3.978926558 | 0.00083189 | 0.00318125 | 3.58643215 | 111.989668 | 21.1193203 | 0.947265744 | 5.745268599 | 1.97841359  | Yipf7         |
| ENSMUSG00000106054  | 0.109927557  | -3.185375006 | 0.00083825 | 0.00320265 | 6.27625626 | 23.677722  | 49.6925184 | 2.841797233 | 2.872634299 | 2.967620385 | Gm34623       |
| ENSMUSG000000097442 | 5.815299935  | 2.539853603  | 0.0008385  | 0.00320286 | 5.37964822 | 3.92946203 | 1.24231296 | 25.5761751  | 20.1084401  | 17.80572231 | Gm26632       |
| ENSMUSG000000034686 | 0.469924366  | -1.089499521 | 0.00084198 | 0.0032147  | 97.730276  | 126.72515  | 177.650753 | 51.1523502  | 69.90076795 | 67.26606207 | Prr7          |
| ENSMUSG000000045062 | 0.348561167  | -1.520516246 | 0.00084979 | 0.00321517 | 80.6947233 | 67.78322   | 68.3272128 | 20.83984638 | 14.3631715  | 40.5574786  | Pcdhb7        |
| ENSMUSG000000021624 | 0.346948725  | -1.527205629 | 0.0008568  | 0.00326756 | 135.387814 | 265.238687 | 146.592929 | 105.1464976 | 42.13196972 | 42.53589219 | Cdt180        |
| ENSMUSG000000087632 | 0.294977518  | -1.761323094 | 0.00085812 | 0.00327184 | 36.7609295 | 88.4128957 | 110.565853 | 19.89258063 | 32.55652206 | 16.81651552 | Gm6058        |
| ENSMUSG000000073805 | 0.273929881  | -1.868121447 | 0.00086237 | 0.00328409 | 60.0727385 | 190.578908 | 377.66314  | 53.99414743 | 57.45268599 | 60.3416145  | Fam196a       |
| ENSMUSG000000027715 | 0.454779738  | -1.136760118 | 0.00086448 | 0.0032901  | 237.60113  | 336.951369 | 325.485995 | 83.35938551 | 200.1268562 | 125.629263  | Ccna2         |
| ENSMUSG000000030329 | 0.450921795  | -1.149050852 | 0.00086888 | 0.00330311 | 66.3489947 | 68.7655855 | 68.3272128 | 22.73437787 | 36.38670112 | 32.64382424 | Planp         |
| ENSMUSG000000050071 | 0.156222542  | -2.678325453 | 0.00086882 | 0.00330311 | 8.96608037 | 53.0477734 | 43.4809536 | 4.736328722 | 4.787723832 | 6.924447566 | Bex1          |
| ENSMUSG000000084843 | 2.747932902  | 1.458346777  | 0.00086884 | 0.00330311 | 24.208417  | 75.6421441 | 34.7847629 | 124.0918125 | 123.5232749 | 122.6616426 | B230312C02Rik |
| ENSMUSG00000102277  | 0.14751123   | -2.761103303 | 0.00087544 | 0.00332578 | 12.525125  | 47.1535444 | 96.9004108 | 13.26172042 | 5.745268599 | 3.956827181 | A130050007Rik |
| ENSMUSG00000108486  | 0.289352505  | -1.780999962 | 0.00088124 | 0.00334481 | 34.9677134 | 93.3247232 | 121.74667  | 31.25976957 | 22.98107439 | 17.80572231 | Gm4836        |
| ENSMUSG000000025429 | 0.25595491   | -1.966038415 | 0.00088506 | 0.00335703 | 55.5896983 | 121.813323 | 36.0270758 | 27.47070659 | 14.3631715  | 12.85968834 | Pstpip2       |
| ENSMUSG000000087027 | 13.0225349   | 3.702938398  | 0.00088586 | 0.00335929 | 1.79321607 | 2.94709652 | 0          | 11.36718893 | 42.13196972 | 10.88127475 | Gm13206       |
| ENSMUSG000000037034 | 2.12822394   | 1.089649965  | 0.00089057 | 0.00337411 | 80.6947233 | 127.707516 | 196.285448 | 286.0742548 | 257.5795422 | 313.5785541 | Pax1          |
| ENSMUSG00000102562  | 0.430140871  | -1.217118877 | 0.00089216 | 0.00337936 | 105.799748 | 175.843426 | 267.097286 | 81.46485402 | 73.73094702 | 80.12575041 | Gm37694       |
| ENSMUSG000000060275 | 0.2398897    | -2.05955688  | 0.00090171 | 0.00341156 | 23.311809  | 34.3827928 | 22.3616333 | 7.578125956 | 7.660358132 | 3.956827181 | Nrg2          |
| ENSMUSG000000007279 | 0.356957468  | -1.486175911 | 0.00091013 | 0.00344005 | 100.4201   | 40.2769858 | 80.7503423 | 25.5761751  | 27.76879823 | 25.71937667 | Scube2        |
| ENSMUSG000000000791 | 0.12152436   | -3.040682564 | 0.00091161 | 0.00344527 | 18.8287688 | 41.2593513 | 18.6346944 | 3.789062978 | 5.745268599 | 0           | Il12rb1       |
| ENSMUSG000000015452 | 0.442385666  | -1.176623455 | 0.00091966 | 0.00347023 | 52.0032661 | 68.7655855 | 78.2657164 | 29.36523808 | 31.59897729 | 26.70858347 | Ager          |
| ENSMUSG000000009235 | 0.476297584  | -1.070064864 | 0.00092546 | 0.00348899 | 62.7625626 | 88.4128957 | 81.9926553 | 40.73242701 | 34.47161159 | 35.61144462 | Rps6kl1       |
| ENSMUSG00000107211  | 5.58927411   | 2.48266093   | 0.0009257  | 0.00348911 | 2.68982411 | 3.92946203 | 4.96925184 | 25.5761751  | 13.40562673 | 24.73016988 | Gm5864        |
| ENSMUSG000000026039 | 0.377993536  | -1.40356653  | 0.0009264  | 0.00349096 | 40.3473617 | 55.0124684 | 60.873335  | 22.73437787 | 14.3631715  | 21.76254949 | Sgol2a        |
| ENSMUSG000000042213 | 2.38300256   | 1.252780501  | 0.00092704 | 0.00349232 | 70.8320349 | 51.0830064 | 28.5731981 | 102.3047004 | 140.7590801 | 118.7048154 | F2and         |
| ENSMUSG00000111118  | 0.147304737  | -2.763124267 | 0.0009327  | 0.00351075 | 9.86268841 | 57.9595649 | 69.5695257 | 11.36718893 | 3.830179066 | 4.946033976 | Gm6545        |
| ENSMUSG000000086108 | 3.882296417  | 1.956910274  | 0.00093541 | 0.00351939 | 12.5525125 | 6.87655855 | 4.96925184 | 24.62890936 | 37.34424589 | 32.62223783 | Gm5602        |
| ENSMUSG000000098055 | 0.166006566  | -2.590687789 | 0.00093951 | 0.00353322 | 18.8276888 | 26.5238687 | 12.4231296 | 3.789062978 | 2.762634299 | 2.967620385 | Gm26947       |
| ENSMUSG000000006522 | 0.214449061  | -1.164431713 | 0.00094643 | 0.00355683 | 127.318341 | 93.3247232 | 86.9619071 | 341.9629338 | 159.909976  | 188.9384979 | Ithi3         |
| ENSMUSG000000065987 | 0.305565366  | -1.710447062 | 0.00094623 | 0.00355683 | 57.3829144 | 32.4180617 | 48.4502054 | 18.94531489 | 15.32071626 | 7.913654361 | Cd209b        |
| ENSMUSG000000021492 | 0.130164440  | 7.023082773  | 0.00095299 | 0.00357671 | 0          | 0          | 0          | 71.99219658 | 0.957544766 | 0.989206795 | F12           |
| ENSMUSG000000097804 | 0.0902515477 | -3.457585795 | 0.00095448 | 0.00358149 | 13.4491206 | 31.4356962 | 18.6346944 | 0           | 4.787723832 | 0.989206795 | Gm16685       |
| ENSMUSG000000024388 | 5.564668439  | 2.47629573   | 0.00095709 | 0.00358968 | 5.37964822 | 4.91182754 | 3.72693888 | 24.62890936 | 41.17442496 | 12.85968834 | Myo7b         |
| ENSMUSG000000074277 | 0.37416243   | -1.418263391 | 0.00095929 | 0.00359552 | 70.8320349 | 70.7303165 | 50.9348313 | 34.1015668  | 15.32071626 | 22.75175629 | Phldb3        |
| ENSMUSG000000085055 | 0.280521549  | -1.833816495 | 0.00096011 | 0.00359778 | 26.0016331 | 29.4709652 | 40.9963277 | 11.36718893 | 9.575447664 | 5.93524771  | Gm15958       |
| ENSMUSG000000052565 | 5.234059711  | 2.387930383  | 0.0009609  | 0.00359995 | 7.1728643  | 3.92946203 | 3.72693888 | 40.73242701 | 18.19335056 | 19.7841359  | Hist1h1d      |
| ENSMUSG000000032373 | 0.152490156  | -2.713211986 | 0.0009673  | 0.0036215  | 8.06947233 | 58.9419305 | 47.2078925 | 4.736328722 | 6.702813365 | 5.935240771 | Car12         |
| ENSMUSG000000086736 | 0.252097052  | 2.384318021  | 0.00096826 | 0.00364249 | 2.68982411 | 4.91182754 | 3.72693888 | 18.94531489 | 13.9353056  | 21.76254949 | Gm14902       |
| ENSMUSG000000037337 | 0.313679757  | -1.672635664 | 0.0009784  | 0.00365898 | 113.869221 | 201.384929 | 124.231296 | 83.35938551 | 29.68388776 | 24.73016988 | Map4k1        |
| ENSMUSG000000026669 | 0.370815009  | -1.431228456 | 0.00098218 | 0.00367147 | 46.6236179 | 54.0301029 | 60.873335  | 26.52344084 | 12.44080196 | 20.7733427  | Mcm10         |
| ENSMUSG000000048924 | 0.406018701  | -1.300381916 | 0.00098319 | 0.00367445 | 110.282789 | 136.548806 | 90.688846  | 65.36133637 | 45.0640402  | 26.70858347 | Ccdc125       |
| ENSMUSG00000002015  | 0.070877835  | -3.818521647 | 0.00098578 | 0.00368248 | 15.2423366 | 26.5238687 | 39.7540147 | 0           | 5.745268599 | 0           | Tnfrsf11      |
| ENSMUSG000000087365 | 0.23597658   | -2.083284412 | 0.00098721 | 0.00368659 | 42.1405777 | 19.6473102 | 65.8425868 | 6.630860211 | 10.53299243 | 12.85968834 | C430049B03Rik |
| ENSMUSG000000054966 | 5.119854308  | 2.356102757  | 0.00098897 | 0.00369108 | 6.27625626 | 4.91182754 | 6.2115648  | 35.99609829 | 12.4480819  |             |               |

|                     |             |              |            |            |            |             |            |             |             |             |               |
|---------------------|-------------|--------------|------------|------------|------------|-------------|------------|-------------|-------------|-------------|---------------|
| ENSMUSG000000105689 | 0.29213261  | -1.775304686 | 0.00109311 | 0.00403314 | 28.6914572 | 28.4885997  | 55.9040832 | 11.36718893 | 9.575447664 | 11.87048154 | Gm43120       |
| ENSMUSG000000087291 | 2.963221357 | 1.567166402  | 0.00110447 | 0.00407241 | 64.5557787 | 30.4533307  | 16.1500685 | 107.9882949 | 109.1601034 | 115.737195  | Gm11946       |
| ENSMUSG00000011840  | 0.293900187 | -1.766601819 | 0.00110448 | 0.00407241 | 94.1438439 | 52.0653719  | 62.115648  | 30.31250382 | 22.98107439 | 7.913654361 | Gm48832       |
| ENSMUSG000000046456 | 0.28464555  | -1.812761551 | 0.00110509 | 0.00407377 | 28.6914572 | 27.5062342  | 24.8462592 | 8.5253917   | 8.617902898 | 5.935240771 | Tmem150b      |
| ENSMUSG000000035448 | 4.04391966  | 2.015754336  | 0.00110614 | 0.00407672 | 8.96608037 | 4.91182754  | 4.96925184 | 21.78711212 | 25.85370869 | 29.67620385 | Ccr3          |
| ENSMUSG00000005427  | 0.353854622 | -1.498771329 | 0.00110863 | 0.00408411 | 46.6236179 | 114.936764  | 125.473609 | 38.83789552 | 26.81125346 | 35.61144462 | Rnf165        |
| ENSMUSG000000068246 | 0.341106406 | -1.551706247 | 0.00111297 | 0.00409747 | 46.6236179 | 149.319557  | 121.74667  | 34.1015668  | 32.55652206 | 41.5466854  | Apol9b        |
| ENSMUSG000000019214 | 0.481125041 | -1.055516206 | 0.00111174 | 0.00411013 | 86.0743716 | 72.6950476  | 67.0848998 | 32.20703531 | 43.08951449 | 33.63303103 | Chtf18        |
| ENSMUSG000000017002 | 0.295990051 | -1.756379412 | 0.00112356 | 0.00413095 | 149.733542 | 562.895436  | 222.37402  | 131.6699385 | 101.4997452 | 43.52509899 | Slpi          |
| ENSMUSG000000085118 | 2.953773118 | 1.562559015  | 0.00114429 | 0.00420075 | 22.4152009 | 8.84128957  | 21.1193203 | 57.78321041 | 43.08951449 | 53.41716694 | Gm15774       |
| ENSMUSG000000087221 | 3.122686026 | 1.642787519  | 0.00114675 | 0.00420793 | 54.6930903 | 16.7002136  | 18.6346944 | 97.56837168 | 81.39130515 | 104.8559203 | BC037032      |
| ENSMUSG000000024730 | 0.199984022 | -2.322043358 | 0.00115556 | 0.00423748 | 30.4846733 | 60.9066615  | 52.1771443 | 17.99804914 | 4.817902898 | 1.97841359  | Ms4a8a        |
| ENSMUSG000000027073 | 0.203464947 | -2.297147825 | 0.00115957 | 0.00424847 | 26.0016331 | 16.7002136  | 18.6346944 | 4.736328722 | 8.787723832 | 2.967620385 | Prg2          |
| ENSMUSG000000095771 | 0.11834033  | -0.378986273 | 0.00117478 | 0.00429574 | 21.5185929 | 48.1339099  | 11.1808166 | 6.630860211 | 0.957544766 | 1.97841359  | lgkv14-111    |
| ENSMUSG000000104213 | 11.9337147  | 3.576971287  | 0.00117465 | 0.00429574 | 16.1389447 | 30.4533307  | 17.3923814 | 615.7227339 | 36.38670112 | 111.7803678 | lgldh         |
| ENSMUSG000000040037 | 0.482242652 | -1.05216884  | 0.00117918 | 0.00431091 | 24.209054  | 115.91913   | 162.742998 | 89.04297998 | 81.39130515 | 80.12575041 | Negr1         |
| ENSMUSG000000048368 | 2.047235427 | 1.033677018  | 0.00118009 | 0.00431234 | 221.462185 | 123.778054  | 101.869663 | 290.8105835 | 274.815348  | 353.1468259 | Omd           |
| ENSMUSG000000027324 | 2.289210638 | 1.194850216  | 0.00118549 | 0.00433021 | 40.3473617 | 39.2946203  | 21.1193203 | 85.253917   | 80.43376038 | 67.26606207 | Rpusd2        |
| ENSMUSG000000102953 | 2.480807462 | 1.310809771  | 0.00120461 | 0.0043924  | 30.4846733 | 18.6649446  | 17.3923814 | 60.62500765 | 53.62250692 | 52.42796014 | Gm37019       |
| ENSMUSG000000065847 | 0.177628243 | -2.493067106 | 0.00121893 | 0.00443966 | 13.4491206 | 30.4533307  | 59.631022  | 9.472657445 | 3.830179066 | 9.46033976  | Gm25188       |
| ENSMUSG000000001508 | 2.028822708 | 1.020642798  | 0.00123129 | 0.00448188 | 259.119723 | 578.613284  | 270.824225 | 737.9200149 | 812.9555067 | 699.3692042 | Sgca          |
| ENSMUSG000000045625 | 0.475172002 | -1.073478263 | 0.00123466 | 0.0044922  | 97.730276  | 68.7655855  | 68.3272128 | 37.89062978 | 33.51406683 | 40.5574786  | Pigz          |
| ENSMUSG000000105568 | 2.02661017  | 1.014827318  | 0.00123503 | 0.00449259 | 46.6236179 | 49.1182754  | 79.5080294 | 103.2519661 | 129.2685435 | 118.7048154 | Gm42971       |
| ENSMUSG000000096971 | 0.395539872 | -1.338104962 | 0.00124001 | 0.00450774 | 54.6930903 | 74.6597786  | 48.4502054 | 26.52344084 | 16.27826103 | 27.69779026 | 4930556M19Rik |
| ENSMUSG000000090941 | 2.212445541 | 1.145641944  | 0.00124265 | 0.00451443 | 66.3489947 | 41.2593513  | 33.5424499 | 112.7246236 | 114.905372  | 87.05019797 | Gm28035       |
| ENSMUSG000000092695 | 0.22207465  | -2.17088338  | 0.00124318 | 0.00451537 | 17.1321607 | 41.2593513  | 75.7810905 | 13.26172042 | 9.575447664 | 6.244447566 | Mir3092       |
| ENSMUSG000000015843 | 0.435167238 | -1.200358148 | 0.00124413 | 0.00451786 | 106.696356 | 218.085143  | 116.777418 | 50.20508446 | 68.94322318 | 73.20130284 | Rxrg          |
| ENSMUSG000000109714 | 0.195390444 | -2.355568185 | 0.00125329 | 0.00454914 | 28.6914572 | 29.4709652  | 21.1193203 | 3.789062978 | 1.915089533 | 9.892067951 | Gm35021       |
| ENSMUSG000000058715 | 0.26316435  | -1.23000342  | 0.00125503 | 0.00455447 | 105.44497  | 2096.36799  | 2156.6553  | 577.8321041 | 1200.761137 | 479.7652956 | Fcer1g        |
| ENSMUSG000000096965 | 0.115239402 | -3.117294021 | 0.00126648 | 0.00459203 | 16.1389447 | 14.7354826  | 36.0270758 | 2.841797233 | 4.787723832 | 0           | 3300005D01Rik |
| ENSMUSG000000009633 | 0.486532978 | -1.039390498 | 0.00126894 | 0.00459997 | 1305.4613  | 659.167256  | 612.460289 | 514.3652992 | 412.701794  | 327.4274492 | G0s2          |
| ENSMUSG000000068396 | 4.134251047 | 1.047625984  | 0.00127346 | 0.00461408 | 4.48304019 | 12.7707516  | 13.6654426 | 25.761751   | 37.34424589 | 63.30923489 | Rpl34-ps1     |
| ENSMUSG000000067616 | 2.209136522 | 1.143482578  | 0.00127714 | 0.00462469 | 27.7948491 | 32.4180617  | 26.0885721 | 52.09961595 | 73.73094702 | 65.28764848 | Klk11         |
| ENSMUSG000000059027 | 0.46194619  | -1.114203286 | 0.00129705 | 0.00468918 | 102.213316 | 171.7126821 | 74.5387776 | 32.20703531 | 34.47161159 | 48.47113296 | 9630013D21Rik |
| ENSMUSG000000022364 | 0.460509385 | -1.118697612 | 0.00129934 | 0.00469396 | 208.909673 | 133.601709  | 95.6580979 | 71.04930383 | 64.15549935 | 67.26606207 | Tbc1d31       |
| ENSMUSG000000081189 | 3.743829342 | 1.904514673  | 0.00130628 | 0.00471496 | 5.37964822 | 11.7883861  | 16.1500685 | 26.52344084 | 54.58005169 | 41.5466854  | Hspd1-ps4     |
| ENSMUSG000000105366 | 2.299734111 | 1.20146707   | 0.00130723 | 0.00471636 | 19.7253768 | 29.4709652  | 36.0270758 | 59.6777419  | 64.15549935 | 70.23368245 | Gm43719       |
| ENSMUSG000000018893 | 0.059735969 | -4.065256296 | 0.00131619 | 0.00474463 | 206.219849 | 3546.33948  | 725.510768 | 105.1464976 | 146.5043493 | 15.82730872 | Mb            |
| ENSMUSG000000045382 | 0.471274423 | -1.085360709 | 0.00131835 | 0.00475036 | 339.814446 | 555.036512  | 500.652123 | 330.5957448 | 173.3156027 | 153.3270532 | Cxcr4         |
| ENSMUSG000000030889 | 2.105025034 | 1.07383739   | 0.00132498 | 0.00477309 | 42.1405777 | 26.5238687  | 38.5117017 | 73.88672807 | 81.39130515 | 70.23368245 | Vwa3a         |
| ENSMUSG000000042115 | 0.204350477 | -2.290882482 | 0.00132676 | 0.00477759 | 21.5185929 | 29.4709652  | 14.9077555 | 4.736328722 | 27.62634299 | 5.935240771 | Klhd8a        |
| ENSMUSG000000058145 | 0.362004445 | -1.465920685 | 0.0013326  | 0.00479348 | 153.319974 | 55.9948339  | 109.32354  | 38.83789552 | 48.83478309 | 27.69779026 | Adamts17      |
| ENSMUSG000000038763 | 0.194757054 | -2.360252515 | 0.00135321 | 0.00486209 | 60.0727385 | 444.029209  | 79.5080294 | 21.78711212 | 62.24040982 | 29.67620385 | Alpk3         |
| ENSMUSG000000043448 | 0.410693855 | -1.283864735 | 0.00135417 | 0.00486209 | 50.2100501 | 45.1888133  | 74.5387776 | 24.62890936 | 21.06598486 | 23.7409638  | Gjc2          |
| ENSMUSG000000075224 | 0.310067026 | -1.689347984 | 0.00135722 | 0.00487161 | 42.1405777 | 45.1888133  | 72.0541516 | 8.5253917   | 24.89616393 | 15.82730872 | Lrrc55        |
| ENSMUSG000000046449 | 0.234783215 | -2.090598821 | 0.00136153 | 0.00488397 | 26.8982411 | 26.5238687  | 16.1500685 | 4.736328722 | 4.787723832 | 6.924447566 | Nxnif         |
| ENSMUSG000000046610 | 0.190097885 | -2.39518561  | 0.00136154 | 0.00488397 | 18.8287688 | 17.6825791  | 29.815511  | 1.894531489 | 6.702813365 | 3.956827181 | Oacyl         |
| ENSMUSG000000099411 | 3.305863647 | 1.725027221  | 0.0013663  | 0.00489989 | 28.6914572 | 122.795688  | 40.9963277 | 162.929708  | 169.4854237 | 304.6756929 | 2310015D24Rik |
| ENSMUSG000000021714 | 3.585125308 | 1.842023545  | 0.00137246 | 0.00491787 | 22.4152009 | 39.2946203  | 42.2386406 | 39.78516127 | 138.8439911 | 192.8953251 | Cenpk         |
| ENSMUSG000000091898 | 0.208504066 | -2.26185258  | 0.00138458 | 0.00495709 | 25.105025  | 63.853758   | 207.466264 | 22.73437787 | 22.02352963 | 16.81651552 | Tnnc1         |
| ENSMUSG000000075296 | 0.39343015  | -1.345820573 | 0.00139436 | 0.00498995 | 104.90314  | 68.5892406  | 60.873335  | 21.78711212 | 45.96214879 | 28.68699706 | Aldh3b2       |
| ENSMUSG000000044461 | 0.294534402 | -1.763491944 | 0.00141276 | 0.00504895 | 110.282789 | 208.261488  | 58.3887091 | 52.09961595 | 40.21688019 | 18.79492911 | Shisa2        |
| ENSMUSG000000052212 | 0.16037048  | -2.64051949  | 0.00141295 | 0.00504895 | 24.208417  | 90.3776267  | 17.3923814 | 10.41992319 | 2.872634209 | 7.13654361  | Cd177         |
| ENSMUSG000000042340 | 0.239013331 | 1.027871207  | 0.00141814 | 0.00506533 | 41.2439697 | 79.5716061  | 63.3579609 | 108.9355606 | 132.1411778 | 133.5429173 | Ctf1          |
| ENSMUSG000000036560 | 0.394521895 | -1.341822728 | 0.00142595 | 0.00508567 | 260.016331 | 124.760419  | 98.1427238 | 52.09961595 | 76.60358132 | 62.32002809 | Lgi4          |
| ENSMUSG000000021773 | 0.495276808 | -1.013693029 | 0.00142955 | 0.00509635 | 94.1438439 | 129.672247  | 178.893066 | 63.46680488 | 69.90076795 | 65.28764848 | Comtd1        |
| ENSMUSG000000085335 | 0.235112972 | -2.088573954 | 0.00143119 | 0.00510112 | 16.1389447 | 36.3475238  | 50.9348313 | 5.683594467 | 8.617902898 | 9.892067951 | Gm13684       |
| ENSMUSG000000085058 | 0.161322412 | -2.631981211 | 0.00144643 | 0.00515324 | 13.4491206 | 19.6473102  | 27.3308851 | 1.894531489 | 1.915089533 | 5.935240771 | 8030453022Rik |
| ENSMUSG000000020061 | 0.044638061 | -4.485581836 | 0.00146266 | 0.00520222 | 106.696356 | 1254.48075  | 375.178514 | 12.31445468 | 63.19795459 | 1.97841359  | Mybpc1        |
| ENSMUSG000000026073 | 0.304548313 | -1.715256982 | 0.00146395 | 0.00520572 | 43.0371858 | 102.166013  | 65.8425868 | 32.20703531 | 21.06598486 | 10.88127475 | Il1r2         |
| ENSMUSG000000078302 | 3.83825178  | 1.940449352  | 0.00146507 | 0.00520794 | 17.9321607 | 14.7354826  | 3.72693888 | 35.04883255 | 42.13196972 | 65.28764848 | Foxd1         |
| ENSMUSG000000097667 | 0.258750213 | -1.950368046 | 0.0014767  | 0.00524328 | 19.7253768 | 68.7655855  | 75.7810905 | 15.15625191 | 16.27826103 | 10.88127475 | Gm26764       |
| ENSMUSG000000101356 | 0.213504091 | -2.227664379 | 0.00148122 | 0.00525708 | 17.9321607 | 19.6473102  | 21.1193203 | 5.683594467 | 3.830179066 | 2.967620385 | Gm28876       |
| ENSMUSG000000108601 | 0.405437122 | -1.302449907 | 0.00149324 | 0.00529305 | 77.1082912 | 111.007302  | 163.985311 | 48.31055297 | 62.24040982 | 31.65461744 | Gm44645       |
| ENSMUSG000000039981 | 0.280677793 | -1.833013169 | 0.00150366 | 0.00532548 | 59.1761304 | 92.3423577  | 108.081227 | 46.41602148 | 14.3631715  | 11.87048154 | Zc3h12d       |
| ENSMUSG000000022824 | 6.416688768 | 2.68         |            |            |            |             |            |             |             |             |               |

|                     |             |              |            |            |            |             |            |             |             |             |               |
|---------------------|-------------|--------------|------------|------------|------------|-------------|------------|-------------|-------------|-------------|---------------|
| ENSMUSG000000105368 | 2.802513308 | 1.486721224  | 0.00177842 | 0.0061953  | 17.9321607 | 14.7354826  | 8.69619071 | 41.67969276 | 35.42915636 | 40.5574786  | Gm43759       |
| ENSMUSG000000025216 | 0.121374565 | -3.042461966 | 0.00178027 | 0.00620046 | 7.1728643  | 207.279122  | 55.9040832 | 4.736328722 | 18.19335056 | 9.892067951 | Lbx1          |
| ENSMUSG000000103614 | 3.880710993 | 1.956320996  | 0.00179745 | 0.00625511 | 3.58643215 | 7.85892406  | 7.45387776 | 22.73437787 | 23.93861916 | 25.71937667 | Gm37949       |
| ENSMUSG000000006086 | 0.355226397 | -1.493189304 | 0.00180236 | 0.00626842 | 125.525125 | 52.0653719  | 52.1771443 | 26.52344084 | 29.68388776 | 25.71937667 | Abhd15        |
| ENSMUSG000000019320 | 3.34627787  | 1.74255725   | 0.00180513 | 0.00627402 | 27.7948491 | 6.87655855  | 12.4231296 | 53.04688169 | 49.79232786 | 56.38478732 | Noxo1         |
| ENSMUSG000000042581 | 4.614167344 | 2.206070328  | 0.00181329 | 0.00629977 | 5.37964822 | 12.7707516  | 4.96925184 | 16.10351766 | 51.70741739 | 39.56827181 | Thsd7b        |
| ENSMUSG000000060550 | 0.404718282 | -1.35010074  | 0.00181379 | 0.00630022 | 837.431907 | 2618.00408  | 882.042201 | 542.7832716 | 473.0271146 | 739.9266828 | HD-Q7         |
| ENSMUSG00000007756  | 0.147510474 | -2.761110697 | 0.00181544 | 0.00630464 | 52.8998742 | 12.7707516  | 18.6346944 | 7.578125956 | 1.915089533 | 2.967620385 | A730056A06Rik |
| ENSMUSG00000026828  | 0.221674939 | -2.173482418 | 0.00182714 | 0.00634004 | 29.5880652 | 24.5591377  | 19.8770073 | 1.894531489 | 6.702813365 | 7.913654361 | Galnt5        |
| ENSMUSG000000050921 | 2.615472549 | 1.387071628  | 0.00184932 | 0.00641435 | 62.7625626 | 85.4657992  | 73.2964646 | 321.1230874 | 95.75447664 | 162.2299144 | P2ry10        |
| ENSMUSG000000072845 | 0.234802042 | -2.090483137 | 0.00185944 | 0.00644678 | 36.7609295 | 41.2593513  | 19.8770073 | 5.683594467 | 13.40562673 | 3.956827181 | Tmprrs11a     |
| ENSMUSG000000039193 | 0.377019177 | -1.407290188 | 0.0018601  | 0.00644773 | 42.1405777 | 62.8713925  | 55.9040832 | 29.36523808 | 15.32071626 | 15.82730872 | Nlrc4         |
| ENSMUSG000000105655 | 0.371832983 | -1.427273348 | 0.00186579 | 0.00646613 | 78.9015073 | 152.266654  | 245.977966 | 57.78321041 | 77.56112608 | 41.5466854  | Gm42659       |
| ENSMUSG000000041957 | 0.460667124 | -1.118203454 | 0.00186997 | 0.00647794 | 102.213316 | 81.5363371  | 119.262044 | 64.41407062 | 41.17442496 | 33.63303103 | Pkp2          |
| ENSMUSG000000109268 | 0.180358118 | -2.471063733 | 0.00187169 | 0.00648121 | 12.5525125 | 16.7002136  | 40.9963277 | 3.789062978 | 3.830179066 | 4.946033976 | 9530078K11Rik |
| ENSMUSG000000030798 | 0.366063724 | -1.44983328  | 0.0018958  | 0.00655928 | 315.606029 | 458.764692  | 344.12069  | 255.761751  | 83.30639468 | 70.23368245 | Cd37          |
| ENSMUSG000000055580 | 2.059219372 | 1.042097531  | 0.00190295 | 0.0065813  | 401.680401 | 251.485857  | 147.835242 | 621.4063284 | 501.7534576 | 530.2148422 | Adcy9         |
| ENSMUSG000000024617 | 0.114340626 | -3.128589997 | 0.00190273 | 0.0065813  | 157.803015 | 1253.49839  | 295.670484 | 35.04883255 | 123.5232749 | 36.60065142 | Camk2a        |
| ENSMUSG000000108841 | 0.263410851 | -1.924613318 | 0.00191063 | 0.00660245 | 50.2100501 | 18.6649446  | 63.3579609 | 8.5253917   | 15.32071626 | 10.88127475 | Frmpd2        |
| ENSMUSG000000028581 | 0.429939949 | -1.217792927 | 0.00192102 | 0.00663344 | 1766.31783 | 3968.75665  | 4792.8434  | 1968.418217 | 1730.283393 | 826.9768807 | Laptrn5       |
| ENSMUSG000000044927 | 0.48722547  | -1.037338541 | 0.00192118 | 0.00663344 | 138.077638 | 165.037405  | 291.943545 | 106.0937634 | 93.83938711 | 89.02861156 | H1fx          |
| ENSMUSG000000005968 | 0.343112221 | -1.543247582 | 0.00192778 | 0.00665485 | 34.0711054 | 49.1182754  | 58.3887091 | 9.472657445 | 17.2358058  | 21.76254949 | Tuft1         |
| ENSMUSG00000005233  | 0.405654093 | -1.301678048 | 0.00194398 | 0.00670309 | 85.1777635 | 141.460633  | 156.531433 | 30.31250382 | 49.79232786 | 75.17971643 | Spz25         |
| ENSMUSG000000064147 | 0.33199331  | -1.590773923 | 0.00195315 | 0.0067272  | 29.5880652 | 79.5716061  | 53.4194572 | 20.83984638 | 18.19335056 | 14.83810193 | Rab44         |
| ENSMUSG000000068614 | 0.227511778 | -2.135986859 | 0.00195666 | 0.00673291 | 789.911681 | 3376.39025  | 887.011453 | 359.9609829 | 467.281846  | 322.4814152 | Actc1         |
| ENSMUSG000000034796 | 0.439255572 | -1.186867506 | 0.00196142 | 0.00675291 | 73.521859  | 61.889027   | 54.6617702 | 28.41797233 | 45.2915636  | 19.7841359  | Cpn7e         |
| ENSMUSG000000022883 | 0.398327496 | -1.327973025 | 0.00196818 | 0.00677479 | 171.252135 | 61.889027   | 126.715922 | 50.20508446 | 54.58005169 | 38.57906501 | Robo1         |
| ENSMUSG000000031101 | 0.332942861 | -1.586653361 | 0.00197531 | 0.00679796 | 158.699623 | 294.709652  | 217.404768 | 139.2480644 | 33.51406683 | 50.44954655 | Sash3         |
| ENSMUSG000000049122 | 0.45478688  | -1.136737461 | 0.00197652 | 0.00680072 | 64.5557787 | 70.3303165  | 50.9348313 | 30.31250382 | 32.53252963 | 32.64382424 | Frm3d         |
| ENSMUSG000000080850 | 0.07467138  | -3.743300789 | 0.00200641 | 0.00689226 | 1.79321607 | 63.853758   | 24.8462592 | 0.947265744 | 3.830179066 | 1.97841359  | Gm12439       |
| ENSMUSG000000109038 | 0.220443779 | -2.18151733  | 0.00201529 | 0.00691852 | 19.7253768 | 42.2417168  | 38.5117017 | 5.683594467 | 13.40562673 | 2.967620385 | Gm45120       |
| ENSMUSG000000029797 | 0.2981399   | -1.745938629 | 0.00202278 | 0.00694282 | 62.7625626 | 31.4356962  | 24.8462592 | 11.36718893 | 11.49505372 | 12.85968834 | Sspo          |
| ENSMUSG000000044288 | 0.36617035  | -1.449413121 | 0.0020361  | 0.00698566 | 92.3506278 | 35.3651583  | 67.0848998 | 21.78711212 | 24.89616393 | 24.73016988 | Cnr1          |
| ENSMUSG000000102854 | 0.287008139 | -1.800836447 | 0.00204001 | 0.00699622 | 41.2439697 | 127.707516  | 244.735653 | 48.31055297 | 34.47161159 | 35.61144462 | C130023A14Rik |
| ENSMUSG000000078958 | 0.820956615 | 3.051016451  | 0.00204604 | 0.00701422 | 6.27625626 | 0.98236551  | 0          | 24.62890936 | 17.7258058  | 21.76254949 | Atp6ap1l      |
| ENSMUSG000000089317 | 2.841690181 | 1.506749272  | 0.00204954 | 0.0070246  | 17.0355527 | 10.8060206  | 13.6654426 | 51.1523502  | 35.42915636 | 31.65461744 | Snord123      |
| ENSMUSG000000037759 | 0.394675239 | -0.341262083 | 0.00209702 | 0.00716394 | 35.8643215 | 55.0124684  | 38.5117017 | 17.0507834  | 17.2358058  | 16.81655152 | Ptger1        |
| ENSMUSG000000070645 | 0.141273658 | -2.823435607 | 0.00211333 | 0.00720937 | 98.6268841 | 21.6120412  | 8.69619071 | 5.683594467 | 7.660358132 | 4.946033976 | Ren1          |
| ENSMUSG000000045327 | 0.418484739 | -1.256753084 | 0.00211802 | 0.00722243 | 59.1761304 | 86.4481647  | 141.623677 | 41.67969276 | 35.42915636 | 42.53589219 | 6330549D23Rik |
| ENSMUSG000000102297 | 0.235941873 | -2.083496615 | 0.00211845 | 0.00722243 | 19.7253768 | 59.924296   | 75.7810905 | 9.472657445 | 20.1084401  | 6.924447566 | 5730585A16Rik |
| ENSMUSG000000109984 | 0.313506057 | -1.673434777 | 0.00213306 | 0.00726757 | 72.4152009 | 38.31252048 | 28.5731981 | 9.472657445 | 8.617902898 | 9.892067951 | Gm38948       |
| ENSMUSG000000108132 | 4.372707289 | 2.128526777  | 0.00214631 | 0.0073026  | 5.37964822 | 12.7707516  | 2.48462592 | 22.73437787 | 38.30179066 | 30.66541065 | Gm44175       |
| ENSMUSG000000030641 | 0.298396148 | -1.744699182 | 0.00214716 | 0.007304   | 32.2778893 | 28.4885997  | 36.0270758 | 9.472657445 | 14.3631715  | 4.946033976 | Ddias         |
| ENSMUSG000000031760 | 0.116331114 | -3.30691079  | 0.00216941 | 0.00737671 | 14.3457286 | 134.584075  | 49.6925184 | 0.947265744 | 18.19335056 | 3.956827181 | MT3           |
| ENSMUSG000000060680 | 5.581173545 | 2.480568507  | 0.00218788 | 0.00743509 | 2.68982411 | 5.89419305  | 1.24231296 | 15.15625191 | 19.15089533 | 21.76254949 | Gm8894        |
| ENSMUSG000000028996 | 0.429305894 | -1.219922116 | 0.00218876 | 0.00743646 | 53.7964822 | 67.78322    | 104.354289 | 26.52344084 | 37.34424589 | 32.64382424 | Rbp7          |
| ENSMUSG000000030124 | 0.456652268 | -1.130832097 | 0.00221276 | 0.00751194 | 76.2116831 | 100.201282  | 159.016059 | 45.69514122 | 53.41716694 | lag3        |               |
| ENSMUSG000000090098 | 0.197468671 | -2.340304314 | 0.00222694 | 0.007557   | 20.6219849 | 22.5944067  | 19.8770073 | 6.630860211 | 4.787723832 | 0.989206795 | Alms1-ps2     |
| ENSMUSG000000010797 | 0.443895684 | -1.171707414 | 0.00223191 | 0.00756929 | 72.625251  | 69.747951   | 104.354289 | 39.78516127 | 23.93861916 | 45.50351258 | Wnt2          |
| ENSMUSG000000038765 | 0.216151276 | -2.210127046 | 0.0022397  | 0.00758808 | 31.3812813 | 16.7002136  | 23.6039462 | 2.841797233 | 3.830179066 | 8.902861156 | Lmx1b         |
| ENSMUSG000000070873 | 0.319364529 | -1.646724008 | 0.00224252 | 0.00760066 | 34.9677134 | 42.2417168  | 24.8462592 | 15.15625191 | 8.617902898 | 8.902861156 | Lila5         |
| ENSMUSG000000044628 | 0.206708057 | -2.274333475 | 0.00224773 | 0.00761677 | 18.8287688 | 13.7531171  | 28.5731981 | 3.789062978 | 2.872634299 | 5.935240771 | Rnf208        |
| ENSMUSG000000058665 | 0.238941209 | -2.065272406 | 0.00225883 | 0.0076528  | 18.8287688 | 30.4533307  | 64.6002739 | 5.683594467 | 12.44808196 | 8.902861156 | En1           |
| ENSMUSG000000026686 | 0.213296921 | -2.229064952 | 0.00226375 | 0.00766642 | 20.6219849 | 13.531171   | 38.5117017 | 3.789062978 | 6.702813365 | 4.946033976 | Lmx1a         |
| ENSMUSG000000007021 | 2.32766534  | 1.218883649  | 0.00228113 | 0.00772218 | 24.208417  | 18.6649446  | 18.6346944 | 40.73242701 | 50.74987262 | 52.42796014 | Syng3         |
| ENSMUSG000000023232 | 0.37183995  | -1.427246314 | 0.00228764 | 0.00774109 | 69.0388189 | 82.5187026  | 34.7847629 | 18.94531489 | 22.02352963 | 28.6899706  | Shcbp1        |
| ENSMUSG000000093514 | 0.302024272 | -1.727263598 | 0.00228749 | 0.00774109 | 28.6914572 | 28.4885997  | 32.1661333 | 6.630860211 | 10.53299243 | 6.924447566 | Gm28727       |
| ENSMUSG000000052920 | 2.175360904 | 1.121254771  | 0.00229936 | 0.0077729  | 556.793591 | 275.062342  | 178.893066 | 779.5997077 | 670.2813365 | 752.7863711 | Prgk1         |
| ENSMUSG000000073274 | 9.971274288 | 3.181305228  | 0.00229914 | 0.0077729  | 0.89660804 | 3.92946203  | 1.24231296 | 6.630860211 | 19.15089533 | 29.6720385  | Gm14636       |
| ENSMUSG000000110453 | 3.909931342 | 1.999568672  | 0.00230193 | 0.00778001 | 7.1728643  | 5.89419305  | 3.72693888 | 28.41797233 | 22.02352963 | 17.80572231 | Gm32352       |
| ENSMUSG000000032105 | 5.697944966 | 2.510441687  | 0.00231107 | 0.00780779 | 3.58643215 | 3.92946203  | 3.72693888 | 19.89258063 | 9.575447664 | 34.62223783 | Pdz3          |
| ENSMUSG000000044258 | 3.39358193  | 1.762808844  | 0.00231931 | 0.00783245 | 1536.78618 | 1783.97576  | 1920.61583 | 2434.472963 | 10394.14844 | 4957.904457 | Ctla2a        |
| ENSMUSG000000075277 | 0.183695288 | -2.444613474 | 0.00232581 | 0.00785125 | 14.3457286 | 16.7002136  | 48.4502054 | 2.841797233 | 6.702813365 | 4.946033976 | Hagl7         |
| ENSMUSG000000029086 | 0.392288511 | -1.35001301  | 0.00233459 | 0.00787772 | 40.3473617 | 34.3827928  | 38.5117017 | 13.26172042 | 13.40562673 | 17.80572231 | Prom1         |
| ENSMUSG000000040473 | 0.437057981 | -1.194103413 | 0.00233454 | 0.00787772 | 99.5234921 | 59.924926   | 55.9040832 | 35.04883255 | 26.81125346 | 32.64382424 | Cfap69        |
| ENSMUSG000000047281 | 0.453574568 | -1.140588345 | 0.00234165 | 0.00789835 | 112        |             |            |             |             |             |               |

|                     |             |              |            |            |            |            |            |             |             |             |               |
|---------------------|-------------|--------------|------------|------------|------------|------------|------------|-------------|-------------|-------------|---------------|
| ENSMUSG00000104339  | 0.270481921 | -1.886395926 | 0.00251435 | 0.00841405 | 29.5880652 | 79.5716061 | 129.200548 | 32.20703531 | 20.1084401  | 11.87048154 | C130089K02Rik |
| ENSMUSG00000042828  | 0.082082287 | -3.606785258 | 0.00251844 | 0.00842357 | 49.313442  | 930.300136 | 224.858646 | 19.89258063 | 65.11304412 | 13.84889513 | Trim72        |
| ENSMUSG00000032221  | 0.377505662 | -1.405429812 | 0.0025215  | 0.00843212 | 52.0032661 | 65.818489  | 32.3001369 | 15.15625191 | 22.98107439 | 18.79492911 | Mns1          |
| ENSMUSG00000103195  | 0.323820597 | -1.626733342 | 0.0025254  | 0.00844181 | 26.8982481 | 40.2769858 | 70.8118387 | 12.31445468 | 17.2358058  | 14.83810193 | Gm37644       |
| ENSMUSG00000027556  | 5.034519375 | 2.331854057  | 0.00253558 | 0.00846742 | 2.68982411 | 4.91182754 | 2.48462592 | 15.15625191 | 17.2358058  | 18.79492911 | Car1          |
| ENSMUSG00000111058  | 3.445572425 | 1.784743683  | 0.00253815 | 0.00847431 | 5.37964822 | 8.84128957 | 7.45387776 | 25.5761751  | 21.06598486 | 27.69779026 | Gm36033       |
| ENSMUSG00000026971  | 0.104580229 | -3.257317957 | 0.00255462 | 0.00852098 | 13.4491206 | 124.760419 | 44.7232665 | 4.736328722 | 14.3631715  | 0           | Itgb6         |
| ENSMUSG00000103851  | 0.328980572 | -1.603925707 | 0.00255467 | 0.00852098 | 58.2795224 | 89.3952612 | 209.95089  | 41.67969276 | 49.79232786 | 25.71937667 | Gm37606       |
| ENSMUSG00000028020  | 0.24625592  | -2.021769685 | 0.00257393 | 0.00857671 | 34.9677134 | 13.7531171 | 49.6925184 | 8.5253917   | 6.702813365 | 8.902861156 | Glrb          |
| ENSMUSG00000078956  | 0.211940163 | -2.238271089 | 0.0025803  | 0.0085911  | 19.7253768 | 18.6649446 | 16.1500685 | 4.736328722 | 1.915089533 | 4.946039376 | Gm14221       |
| ENSMUSG00000063193  | 0.462913081 | -1.111186765 | 0.00258734 | 0.00860771 | 156.906406 | 232.820625 | 192.558509 | 122.197281  | 98.62711094 | 47.47113296 | Cd300lb       |
| ENSMUSG00000027496  | 0.464232059 | -1.10708194  | 0.00260751 | 0.00866967 | 62.7625626 | 108.060206 | 106.838914 | 33.15430106 | 44.04705926 | 51.43875335 | Aurka         |
| ENSMUSG00000060913  | 0.07954268  | -3.65212702  | 0.00262551 | 0.00872604 | 9.86268841 | 162.090309 | 44.7232665 | 1.894531489 | 15.32071626 | 0           | Trim55        |
| ENSMUSG00000055809  | 0.475714032 | -1.071833516 | 0.00264496 | 0.00878546 | 100.4201   | 94.3070887 | 64.6002739 | 33.15430106 | 37.34424589 | 53.41716694 | Dnaa1f3       |
| ENSMUSG00000106472  | 0.28224778  | -1.824965863 | 0.00264609 | 0.00878749 | 20.6219849 | 26.5238687 | 38.5117017 | 10.41992319 | 8.617902898 | 4.946039376 | Gm43111       |
| ENSMUSG00000005847  | 0.044220863 | -4.499128997 | 0.00264788 | 0.00879168 | 46.6236179 | 1021.66013 | 183.862318 | 19.89258063 | 34.47161159 | 0.989206795 | Cxcl2         |
| ENSMUSG00000024386  | 73.62097025 | 6.202044858  | 0.00265892 | 0.0088266  | 0.89660804 | 0          | 0          | 76.7285253  | 4.787723832 | 0           | Proc          |
| ENSMUSG00000027077  | 0.087360928 | -3.516868011 | 0.00266358 | 0.00883962 | 7.1728643  | 135.56644  | 11.1808166 | 1.894531489 | 9.575447664 | 1.97841359  | Smtnl1        |
| ENSMUSG00000104867  | 0.137375387 | -2.863804547 | 0.00266389 | 0.00883962 | 8.06947233 | 25.5415032 | 50.9348313 | 1.894531489 | 7.660358132 | 1.97841359  | Gm43728       |
| ENSMUSG00000004371  | 0.311988442 | -1.680435513 | 0.00266974 | 0.00885727 | 21.5185928 | 29.4709652 | 36.0270758 | 10.41992319 | 6.702813365 | 9.892067951 | Il11          |
| ENSMUSG00000027510  | 2.030760554 | 1.022020142  | 0.00267538 | 0.00886721 | 264.499371 | 605.137153 | 332.939873 | 602.4610135 | 1073.407683 | 766.6352662 | Rbm38         |
| ENSMUSG00000035189  | 2.876738571 | 1.52443412   | 0.00271375 | 0.00898019 | 12.5525125 | 14.7354826 | 14.9077555 | 35.99609829 | 27.76879823 | 57.37399412 | Ano4          |
| ENSMUSG00000082419  | 0.249880348 | -2.000690653 | 0.002752   | 0.00909422 | 20.6219849 | 68.7655855 | 113.050479 | 10.41992319 | 16.27826103 | 23.74096308 | Gm11425       |
| ENSMUSG00000030178  | 0.308330091 | -1.697452403 | 0.00275483 | 0.00909464 | 24.208417  | 35.3651583 | 31.057824  | 8.5253917   | 13.40562673 | 5.935240771 | Klra13-ps     |
| ENSMUSG00000036244  | 4.645839233 | 2.215939231  | 0.00275306 | 0.00909464 | 8.96608037 | 1.96473102 | 3.72693888 | 26.52344084 | 20.1084401  | 22.75175629 | Tbc1d21       |
| ENSMUSG00000040729  | 2.823908618 | 1.497693404  | 0.00275464 | 0.00909464 | 52.0032661 | 27.5062342 | 12.4231296 | 81.46485402 | 82.34884991 | 98.92067951 | Gm41125       |
| ENSMUSG00000025127  | 10.74752571 | 3.425932657  | 0.00277596 | 0.00915538 | 2.68982411 | 0          | 4.96925184 | 55.88867892 | 17.2358058  | 6.924447566 | Gcgr          |
| ENSMUSG00000027843  | 0.452606035 | -1.143672273 | 0.00280455 | 0.00923928 | 98.6268841 | 197.455467 | 109.32354  | 74.83399381 | 64.15549935 | 44.51430578 | Ptpn22        |
| ENSMUSG00000005357  | 0.233513455 | -2.098422417 | 0.00280579 | 0.00924105 | 23.311809  | 20.925967  | 52.1771443 | 3.789062978 | 6.702813365 | 11.87048154 | Slc1a6        |
| ENSMUSG00000107304  | 0.188549256 | -2.40698664  | 0.00288511 | 0.00947441 | 10.7592964 | 37.3298893 | 69.5695257 | 11.36718893 | 6.702813365 | 3.956827181 | Gm43775       |
| ENSMUSG00000033268  | 0.291744454 | -1.777222863 | 0.00292591 | 0.0095915  | 32.2778893 | 29.4709652 | 68.3272128 | 6.630860211 | 15.32071626 | 15.82730872 | Duox1         |
| ENSMUSG00000087526  | 2.381233627 | 1.251709173  | 0.00295942 | 0.00969566 | 17.035527  | 15.7178481 | 21.1193203 | 36.94336403 | 42.13196972 | 48.47113296 | Gm15738       |
| ENSMUSG00000092569  | 2.050195355 | 1.035761385  | 0.00298304 | 0.00976162 | 31.3812813 | 31.4356962 | 23.6039462 | 58.73047616 | 65.11304412 | 54.40637373 | Gm20544       |
| ENSMUSG00000052305  | 2.273483162 | 1.184904319  | 0.00299726 | 0.00980243 | 554.103767 | 903.776267 | 2082.11652 | 2383.320613 | 2699.318697 | 2960.695938 | Hbb-bs        |
| ENSMUSG00000002588  | 0.461199526 | -1.264652771 | 0.00301303 | 0.00984632 | 42.2643518 | 279.97417  | 44.7232665 | 309.7558984 | 134.0562673 | 115.737195  | Pon1          |
| ENSMUSG00000052087  | 0.423446219 | -1.239749349 | 0.0030381  | 0.00992438 | 85.1777635 | 131.636978 | 89.4465331 | 66.30860211 | 28.72634299 | 34.62223783 | Rgs14         |
| ENSMUSG00000031382  | 0.162635383 | -2.02286927  | 0.00306166 | 0.00998193 | 26.0016331 | 243.626646 | 32.3001369 | 7.578125956 | 29.68388776 | 11.87048154 | Asb11         |
| ENSMUSG00000107390  | 0.205078506 | -2.285751803 | 0.00308834 | 0.01006108 | 21.5185929 | 41.2593513 | 44.7232665 | 12.31445468 | 8.617902898 | 0.989206795 | Gm43323       |
| ENSMUSG00000051498  | 0.49958628  | -1.001194237 | 0.00312382 | 0.01016319 | 83.3845474 | 96.2718197 | 72.0541516 | 49.25781871 | 46.91969356 | 29.67620385 | Tlrf6         |
| ENSMUSG00000049036  | 0.275693454 | -1.858863084 | 0.0031521  | 0.01024889 | 34.9677134 | 25.5415032 | 23.6039462 | 5.683594467 | 4.787723832 | 12.85968834 | Tmem121       |
| ENSMUSG00000091405  | 3.123346671 | 1.643092708  | 0.00318257 | 0.01033798 | 25.105025  | 7.85892406 | 9.93850367 | 50.20508446 | 45.00460402 | 40.5574786  | Gm29773       |
| ENSMUSG00000086451  | 0.43757574  | -1.192395341 | 0.00318851 | 0.01035323 | 59.1761304 | 40.2769858 | 57.1463961 | 18.94531489 | 27.76879823 | 21.76254949 | A933431K23Rik |
| ENSMUSG00000050896  | 0.349395133 | -1.517068583 | 0.00320461 | 0.01039949 | 32.2778893 | 29.4709652 | 52.1771443 | 9.472657445 | 16.27826103 | 13.84889513 | Rtn4rl2       |
| ENSMUSG00000091955  | 0.344924955 | -1.535645585 | 0.00323621 | 0.01049394 | 22.4152009 | 35.3651583 | 34.7847629 | 10.41992319 | 11.49053702 | 9.892067951 | Gm9844        |
| ENSMUSG00000091509  | 0.480703751 | -1.056780033 | 0.00324335 | 0.010513   | 325.468717 | 620.855001 | 985.154177 | 288.9160521 | 341.8434816 | 296.7620385 | Gm17066       |
| ENSMUSG00000017740  | 0.408998043 | -1.289834156 | 0.00328301 | 0.0106169  | 60.9693465 | 36.3475238 | 45.9655795 | 23.68164361 | 19.15089533 | 15.82730872 | Slc12a5       |
| ENSMUSG000000110547 | 0.161995866 | -2.625971096 | 0.00331677 | 0.01071996 | 11.6559045 | 130.654613 | 29.815511  | 6.630860211 | 15.32071626 | 5.935240771 | Gm29773       |
| ENSMUSG00000031397  | 5.669816578 | 2.503302064  | 0.00333176 | 0.01076218 | 5.37964822 | 0.98236551 | 2.48462592 | 15.15625191 | 19.15089533 | 16.81651552 | Tktl1         |
| ENSMUSG00000026180  | 3.02091894  | 1.594987473  | 0.00333275 | 0.0107633  | 24.208417  | 86.4481647 | 40.9963277 | 245.3418278 | 117.7780063 | 94.96385233 | Cxcr2         |
| ENSMUSG00000053886  | 0.336150243 | -1.578221901 | 0.00336219 | 0.01084793 | 56.4863063 | 66.8008545 | 68.3272128 | 16.10351766 | 38.30179066 | 9.892067951 | Sh2d4a        |
| ENSMUSG00000043789  | 2.889368076 | 1.530754     | 0.0033902  | 0.01093412 | 12.6219849 | 12.7707516 | 19.8770073 | 27.47070659 | 69.90076956 | 56.38478732 | Vwce          |
| ENSMUSG00000050157  | 7.450248409 | 2.897288529  | 0.00339333 | 0.0109421  | 2.68982411 | 2.94709652 | 1.24231296 | 5.683594467 | 25.85370869 | 20.7733427  | Gm867         |
| ENSMUSG00000027977  | 2.337731016 | 1.22510894   | 0.00340937 | 0.01098959 | 30.4846733 | 19.6473102 | 18.6346944 | 44.52148999 | 66.07058888 | 51.43875335 | Ndst3         |
| ENSMUSG00000076586  | 0.044514678 | -4.489575066 | 0.003419   | 0.01101431 | 81.5913314 | 47.1535444 | 0          | 4.736328722 | 0           | 0.989206795 | Igkv8-21      |
| ENSMUSG00000085348  | 0.117894241 | -3.084434855 | 0.00343614 | 0.01106526 | 15.2423366 | 242.64428  | 43.4809536 | 2.841797233 | 28.72634299 | 3.956827181 | Myhas         |
| ENSMUSG00000053749  | 0.196073748 | -2.350531706 | 0.00347314 | 0.01117798 | 24.208417  | 20.6296757 | 18.6346944 | 8.5253917   | 1.915089533 | 1.97841359  | Gm9920        |
| ENSMUSG00000102719  | 0.276242844 | -1.874918508 | 0.00347577 | 0.01118429 | 26.0016331 | 89.3952612 | 16.856174  | 34.1015668  | 19.15089533 | 13.84889513 | Gm37760       |
| ENSMUSG00000096351  | 3.611857511 | 1.852740979  | 0.00349337 | 0.01123446 | 8.06947233 | 3.92946203 | 8.69619071 | 19.89258063 | 31.59897729 | 22.75175629 | Samd11        |
| ENSMUSG00000049336  | 0.284671347 | -1.812630808 | 0.00349786 | 0.01124677 | 24.208417  | 47.1535444 | 19.8770073 | 6.630860211 | 10.53299243 | 8.902861156 | Tenn2         |
| ENSMUSG00000051855  | 0.344379043 | -1.537964677 | 0.00353837 | 0.01135961 | 873.296228 | 265.238687 | 17.759056  | 104.1992319 | 291.093609  | 107.8235407 | Mest          |
| ENSMUSG00000029597  | 3.000116225 | 1.585018392  | 0.00354042 | 0.011364   | 17.035527  | 12.7707516 | 7.45387776 | 51.1523502  | 33.51406683 | 28.68699706 | Sds           |
| ENSMUSG00000048647  | 0.469268741 | -1.091513732 | 0.00356816 | 0.01144649 | 53.7964822 | 53.0477734 | 68.3272128 | 22.73437787 | 34.47161159 | 24.73016988 | Exd1          |
| ENSMUSG00000031250  | 0.381874701 | -1.388882748 | 0.0035858  | 0.01149647 | 216.979145 | 61.889027  | 200.012386 | 65.36133637 | 69.90076795 | 47.48192617 | Tnmd          |
| ENSMUSG00000063011  | 0.083304597 | -3.585460079 | 0.00362531 | 0.01159879 | 2.68982411 | 40.2769858 | 26.0885721 | 2.841797233 | 2.872634299 | 0           | Msln          |
| ENSMUSG00000036136  | 0.17171066  | -2.541948487 | 0.0036536  | 0.01168039 | 29.5880652 | 13.7531171 | 12.4231296 | 1.894531489 | 5.745268599 | 1.97841359  | Fam110c       |
| ENSMUSG00000107428  | 0.213395111 | -2.228400968 | 0.00366355 | 0.01170773 | 12.5525125 | 29.4709652 | 34.7847629 | 7.578125956 | 6.702813365 | 1.97841359  | Gm44154       |
| ENSMUSG00000037849  | 0.249054416 | -2.00        |            |            |            |            |            |             |             |             |               |

|                    |             |              |            |            |            |            |            |             |              |             |               |
|--------------------|-------------|--------------|------------|------------|------------|------------|------------|-------------|--------------|-------------|---------------|
| ENSMUSG00000102437 | 3.20800963  | 1.681678473  | 0.00402928 | 0.01270478 | 8.06947233 | 15.7178481 | 8.69619071 | 20.83984638 | 41.17442496  | 42.53589219 | Gm38048       |
| ENSMUSG00000085192 | 0.358659146 | -1.479314673 | 0.00407521 | 0.01282548 | 26.8982411 | 50.1006409 | 74.5387776 | 18.94531489 | 16.27826103  | 18.79492911 | Gm12195       |
| ENSMUSG00000017792 | 0.260924362 | -1.938296442 | 0.00409712 | 0.01288477 | 22.4152009 | 21.6120412 | 14.9077555 | 3.789062978 | 5.745268599  | 5.935240771 | Gm43914       |
| ENSMUSG00000076613 | 0.28483374  | -1.811808044 | 0.00421839 | 0.01322649 | 105.799748 | 157.178481 | 115.535105 | 74.83399381 | 22.98107439  | 9.892067951 | lghg2b        |
| ENSMUSG00000044528 | 0.346793793 | -1.527850017 | 0.00424329 | 0.01329648 | 42.1405777 | 28.4885997 | 52.1771443 | 17.99804914 | 7.660358132  | 16.81651552 | Tram111       |
| ENSMUSG00000090919 | 0.372249628 | -1.425657689 | 0.00424388 | 0.01329648 | 56.4863063 | 26.5238687 | 38.5117017 | 14.20898617 | 15.32071626  | 15.82730872 | Pabpc4l       |
| ENSMUSG00000019852 | 0.343559539 | -1.541217401 | 0.00425792 | 0.01333301 | 36.7609295 | 24.5591377 | 57.1463961 | 13.36718893 | 17.2358058   | 11.87048154 | Arfge3f       |
| ENSMUSG00000034435 | 0.483071144 | -1.049691533 | 0.00427983 | 0.01338415 | 69.9354269 | 64.8361235 | 105.596602 | 47.36328722 | 30.64143253  | 37.58985821 | Tmem30b       |
| ENSMUSG00000027762 | 0.362854387 | -1.462537384 | 0.0043485  | 0.01357865 | 40.3473617 | 35.3651583 | 40.9963277 | 21.78711212 | 8.617902898  | 11.87048154 | Sucnr1        |
| ENSMUSG00000065530 | 0.316306626 | -1.660604319 | 0.00437859 | 0.01365736 | 26.8982411 | 61.889027  | 119.262044 | 23.68164361 | 22.98107439  | 18.79492911 | Mir99a        |
| ENSMUSG00000027895 | 6.617629402 | 2.726314501  | 0.00439252 | 0.01369319 | 21.1585929 | 182.719984 | 23.6039462 | 489.7363899 | 498.8808233  | 520.3227742 | Kcnc4         |
| ENSMUSG00000046215 | 0.199311473 | -2.326903333 | 0.00444982 | 0.0138538  | 14.3457286 | 11.7883861 | 27.3308851 | 4.736328722 | 3.830179066  | 1.97841359  | Rprml         |
| ENSMUSG00000103546 | 0.341102017 | -2.052284376 | 0.00445617 | 0.01387099 | 12.5525125 | 30.4533307 | 53.4194572 | 10.41992319 | 6.702813365  | 5.935240771 | Gm37666       |
| ENSMUSG00000071005 | 0.342946763 | -1.584394358 | 0.00450664 | 0.01401107 | 21.5185929 | 41.2593513 | 36.0270758 | 8.5253917   | 13.40562673  | 11.87048154 | Ccl19         |
| ENSMUSG00000049173 | 0.075879741 | -3.720141441 | 0.00453385 | 0.01408905 | 8.06947233 | 130.654613 | 1.24231296 | 1.894531489 | 4.787723832  | 3.956827181 | Myoz3         |
| ENSMUSG00000111254 | 0.256596356 | -1.962427414 | 0.00453546 | 0.01408905 | 17.9321607 | 39.2946203 | 74.5387776 | 11.36718893 | 16.27826103  | 5.935240771 | Gm48717       |
| ENSMUSG00000108298 | 0.48480849  | -1.44513313  | 0.00459162 | 0.01425032 | 67.2456028 | 61.889027  | 50.9348313 | 35.99609829 | 28.72634299  | 22.75175629 | Gm44226       |
| ENSMUSG00000041596 | 0.456350837 | -1.131784717 | 0.00459493 | 0.01425797 | 70.8320349 | 46.1711789 | 53.4194572 | 31.25976957 | 26.81125346  | 19.7841359  | Nlrp5-ps      |
| ENSMUSG00000019845 | 0.29063165  | -1.782736273 | 0.00464599 | 0.01437919 | 49.313442  | 41.2593513 | 14.9077555 | 8.5253917   | 12.44808196  | 9.892067951 | Tubet1        |
| ENSMUSG00000031445 | 3.243527743 | 1.697563779  | 0.00464599 | 0.01437919 | 17.9321607 | 37.3298893 | 28.5731981 | 164.8242395 | 37.34424589  | 69.24447566 | Probe         |
| ENSMUSG00000021356 | 0.441592141 | -1.1792136   | 0.0046478  | 0.01438213 | 232.221482 | 256.397397 | 159.016059 | 155.3515821 | 52.66496215  | 78.14733682 | Irf4          |
| ENSMUSG00000032179 | 0.35163286  | -1.5078582   | 0.00467375 | 0.01445444 | 124.628517 | 47.1535444 | 40.9963277 | 27.47070659 | 24.89616393  | 22.75175629 | Bmp5          |
| ENSMUSG00000102813 | 0.383831591 | -1.584394358 | 0.00471754 | 0.01457376 | 121.938693 | 53.0477374 | 50.9348313 | 26.52344084 | 22.98107439  | 37.58985821 | Gm37795       |
| ENSMUSG00000020309 | 2.003489342 | 1.002514835  | 0.00476488 | 0.01471188 | 119.248869 | 131.636978 | 90.688846  | 128.8281412 | 302.5841462  | 254.2261463 | Chac2         |
| ENSMUSG00000079019 | 0.401626378 | -1.316074068 | 0.00481601 | 0.01485336 | 53.7964822 | 33.4004273 | 32.3001369 | 15.15625191 | 17.2358058   | 15.82730872 | Insl3         |
| ENSMUSG00000082738 | 2.227245067 | 1.155260309  | 0.00483873 | 0.01492068 | 34.9677134 | 22.5944067 | 58.3887091 | 73.88672807 | 10.09298085  | 91.99623195 | Gm15422       |
| ENSMUSG00000033898 | 10.30102836 | 3.364716465  | 0.00484514 | 0.0149377  | 10.7592964 | 3.92946203 | 8.69619071 | 224.5019814 | 13.40562673  | 2.967620385 | Cfhr2         |
| ENSMUSG00000037096 | 2.367145827 | 1.243148585  | 0.00486168 | 0.01498519 | 21.5185929 | 20.2696757 | 21.1193203 | 32.20703531 | 62.2400982   | 55.39558053 | Gm9762        |
| ENSMUSG00000104388 | 0.338223402 | -1.587171218 | 0.00486449 | 0.01499185 | 82.4879394 | 258.362128 | 467.109673 | 125.0390783 | 100.00920805 | 53.41716694 | Gm37033       |
| ENSMUSG00000046856 | 0.377750006 | -1.404496318 | 0.00487388 | 0.01501378 | 34.0711054 | 25.5415032 | 32.3001369 | 13.26172042 | 9.575447664  | 11.87048154 | Gpr1          |
| ENSMUSG00000076614 | 0.333761248 | -1.583111638 | 0.00501157 | 0.01538582 | 49.313442  | 248.538473 | 105.596602 | 55.88867892 | 42.13196972  | 36.60065142 | lghg1         |
| ENSMUSG00000104235 | 4.572670298 | 2.1930369    | 0.00502594 | 0.01542428 | 16.1389447 | 4.91182754 | 3.72693888 | 63.46680488 | 17.2358058   | 34.6223783  | Gm37589       |
| ENSMUSG00000049985 | 0.291325672 | -1.779295255 | 0.0050399  | 0.01546146 | 28.6914572 | 18.6649446 | 32.3001369 | 10.41992319 | 3.830179066  | 8.902861156 | Ankrd55       |
| ENSMUSG00000107083 | 3.74969668  | 1.906773898  | 0.00503972 | 0.01546146 | 5.37964822 | 3.92946203 | 6.2115648  | 23.68164361 | 16.27826103  | 17.80572231 | Gm43313       |
| ENSMUSG00000106057 | 0.181406021 | -2.462705757 | 0.00506892 | 0.01554482 | 6.27625626 | 37.3298893 | 58.3887091 | 3.789062978 | 5.745268599  | 8.902861156 | Gm33560       |
| ENSMUSG00000083621 | 2.490957025 | 1.316700132  | 0.00509183 | 0.01559514 | 17.0355527 | 35.3651583 | 55.9040832 | 72.93946232 | 82.34884991  | 111.7803678 | Gm14586       |
| ENSMUSG00000047462 | 0.234060632 | -2.095045794 | 0.00512103 | 0.01567598 | 24.208417  | 31.4356962 | 9.93850367 | 3.789062978 | 5.745268599  | 5.935240771 | AS3009919Rik  |
| ENSMUSG00000035683 | 0.442058425 | -1.177691039 | 0.00514258 | 0.0157362  | 75.3150751 | 67.78322   | 64.6002739 | 16.10351766 | 38.30179066  | 37.58985821 | Melk          |
| ENSMUSG00000034768 | 0.121935262 | -3.035812696 | 0.00515182 | 0.01576159 | 22.4152009 | 208.261488 | 37.2693888 | 0.947265744 | 27.76879823  | 3.956827181 | Asb16         |
| ENSMUSG00000037542 | 3.272841355 | 5.032471767  | 0.00516473 | 0.01579534 | 0.89660804 | 0          | 1.24231296 | 65.36133637 | 1.915089533  | 0.989206795 | Alcna         |
| ENSMUSG00000002341 | 3.022301301 | 1.595647494  | 0.00518463 | 0.01585043 | 6.27625626 | 7.85892406 | 14.9077555 | 25.5761751  | 38.30179066  | 36.6541065  | Ncan          |
| ENSMUSG00000111512 | 4.080274194 | 2.028666105  | 0.00520117 | 0.0158923  | 7.1728643  | 3.92946203 | 2.48462592 | 21.78711212 | 17.2358058   | 17.80572231 | AC112680.1    |
| ENSMUSG00000060730 | 3.835846847 | 1.939545119  | 0.00521347 | 0.0159241  | 3.58643215 | 7.85892406 | 7.45387776 | 14.20898617 | 24.89616393  | 32.64382424 | Gm10086       |
| ENSMUSG00000027956 | 0.194720373 | -2.360524262 | 0.00524569 | 0.01599632 | 17.0355527 | 34.3827928 | 22.3616333 | 10.41992319 | 1.915089533  | 1.97841359  | Tmem144       |
| ENSMUSG00000106735 | 4.376708673 | 2.129846357  | 0.00528728 | 0.01609682 | 3.58643215 | 5.89419305 | 3.72693888 | 22.73437787 | 10.53299243  | 24.73016988 | A330058E17Rik |
| ENSMUSG00000047394 | 0.359108584 | -1.477507954 | 0.00530799 | 0.01614522 | 35.8643215 | 24.5591377 | 31.057824  | 9.472657445 | 8.617902898  | 14.83810193 | Odfr3b        |
| ENSMUSG00000018822 | 0.291089492 | -1.780465335 | 0.00531198 | 0.01615443 | 91.4540198 | 434.205554 | 72.0541516 | 57.78321041 | 72.73402225  | 43.52509899 | Sfrp5         |
| ENSMUSG00000034634 | 4.759687766 | 2.250866936  | 0.00531317 | 0.01615512 | 11.6559045 | 32.4180617 | 29.815511  | 223.5547157 | 14.3631715   | 112.7695746 | Lyd6          |
| ENSMUSG00000080198 | 0.181168835 | -2.46459329  | 0.005321   | 0.01617305 | 6.27625626 | 21.6120412 | 31.057824  | 3.789062978 | 3.830179066  | 2.967620385 | Gm13573       |
| ENSMUSG00000109780 | 2.662377368 | 1.412715075  | 0.00539339 | 0.01637827 | 8.96608037 | 11.7883861 | 12.4231296 | 32.20703531 | 25.85370869  | 29.67620385 | Gm45447       |
| ENSMUSG00000092526 | 0.399359031 | -1.324241758 | 0.00547436 | 0.01658815 | 39.4507536 | 55.0124684 | 86.9619071 | 29.36523808 | 26.81125346  | 15.82730872 | Gm17907       |
| ENSMUSG00000020686 | 2.642417882 | 1.401858638  | 0.00548897 | 0.0166264  | 13.4491206 | 11.7883861 | 8.69619071 | 34.1015668  | 27.76879823  | 28.68699706 | Gas2l2        |
| ENSMUSG00000020612 | 2.198674293 | 1.136633902  | 0.0054937  | 0.01663172 | 31.3812813 | 66.8008545 | 29.815511  | 87.14844849 | 111.0751929  | 84.08257759 | Cd28          |
| ENSMUSG00000067389 | 2.303884031 | 1.02210786   | 0.00553002 | 0.01673565 | 49.313442  | 25.5415032 | 32.3001369 | 77.67579105 | 72.77340225  | 68.25526886 | Gm17080       |
| ENSMUSG00000034730 | 2.274212049 | 1.185366778  | 0.00555575 | 0.01681048 | 21.5185929 | 18.6649446 | 32.3001369 | 39.78516127 | 60.32532029  | 63.30923489 | Adgrb1        |
| ENSMUSG00000105136 | 0.271363577 | -1.881701001 | 0.00558205 | 0.01687486 | 17.0355527 | 11.0830064 | 106.838914 | 17.99804914 | 13.40562673  | 15.82730872 | 8030487014Rik |
| ENSMUSG00000019726 | 2.233364918 | 1.191281898  | 0.00559033 | 0.01689379 | 765.703264 | 389.016741 | 203.739325 | 1326.172042 | 900.0920805  | 811.149572  | Lyst          |
| ENSMUSG00000051242 | 0.446213261 | -1.164194707 | 0.00558982 | 0.01689379 | 118.352261 | 53.0477374 | 69.5695257 | 40.73242701 | 37.34424589  | 29.67620385 | Pcdh9         |
| ENSMUSG00000103674 | 3.971232685 | 1.989586894  | 0.00559443 | 0.01690166 | 2.68982411 | 5.89419305 | 14.9077555 | 38.83789552 | 22.02352963  | 29.67620385 | NA            |
| ENSMUSG00000097791 | 2.648001142 | 1.404903744  | 0.00565336 | 0.0170505  | 19.7253768 | 18.6649446 | 74.5387776 | 48.31055297 | 35.42915636  | 39.56827181 | Gm17315       |
| ENSMUSG00000005628 | 0.095301716 | -3.391354    | 0.00567471 | 0.01711182 | 107.592964 | 1255.46312 | 213.677829 | 39.78516127 | 99.58465571  | 10.88127475 | Tmod4         |
| ENSMUSG00000022887 | 0.268081546 | -1.899256185 | 0.00567653 | 0.01711424 | 171.252135 | 73.6774131 | 26.0885721 | 36.94336403 | 22.02352963  | 13.84889513 | Masp1         |
| ENSMUSG00000021898 | 0.254771732 | -1.972722881 | 0.00568242 | 0.01712583 | 36.7609295 | 230.855894 | 45.9655795 | 20.83984638 | 37.34424589  | 21.76254949 | Asb14         |
| ENSMUSG00000028438 | 2.4766205   | 1.308372817  | 0.00568168 | 0.01712583 | 23.311809  | 29.4709652 | 13.6654426 | 38.83789552 | 73.73094702  | 53.41716694 | Kif24         |
| ENSMUSG00000078452 | 0.243997042 | -2.035064437 | 0.0056922  | 0.01714915 | 22.4152009 | 19.6473102 | 17.3923814 | 1.894531489 | 4.787723832  | 7.913654361 | Raet1d        |
| ENSMUSG00000108218 | 0.443447978 | -1.173163228 | 0.00571627 | 0.01721547 | 185.597864 | 118.866226 | 64.6       |             |              |             |               |

|                     |             |              |            |            |            |            |            |             |             |             |                |
|---------------------|-------------|--------------|------------|------------|------------|------------|------------|-------------|-------------|-------------|----------------|
| ENSMUSG000000108633 | 0.420190029 | -1.250886166 | 0.00624553 | 0.01858305 | 136.284422 | 286.850728 | 525.498382 | 107.9882949 | 175.2306923 | 114.7479882 | Gm44694        |
| ENSMUSG00000043939  | 0.27532491  | -1.860792954 | 0.00625978 | 0.01861849 | 17.0355527 | 79.5716061 | 57.1463961 | 21.78711212 | 10.53299243 | 9.892067951 | A530064D06Rik  |
| ENSMUSG000000109675 | 0.182087175 | -2.457298786 | 0.00626615 | 0.01862532 | 21.5185929 | 24.5591377 | 17.3923814 | 6.630860211 | 0           | 4.946033976 | Nxpe1-ps       |
| ENSMUSG00000024245  | 0.371057935 | -1.430283637 | 0.00627432 | 0.01864191 | 22.4152009 | 36.3475238 | 29.815511  | 9.472657445 | 11.49053727 | 11.87048154 | Tmnet178       |
| ENSMUSG00000029121  | 0.308508643 | -1.696617188 | 0.00629458 | 0.01869219 | 23.311809  | 19.6473102 | 42.2386406 | 5.683594467 | 9.575447664 | 10.88127475 | Crmp1          |
| ENSMUSG00000008498  | 2.315723832 | 1.211463211  | 0.00634029 | 0.01881128 | 40.3473617 | 19.6473102 | 21.1193203 | 66.30860211 | 47.87723832 | 75.17971643 | Rnf207         |
| ENSMUSG000000103038 | 0.176736589 | -2.500327345 | 0.00635486 | 0.01884784 | 5.37964822 | 21.6120412 | 33.5424499 | 3.789062978 | 2.87634299  | 3.956827181 | Gm37124        |
| ENSMUSG00000078490  | 0.493034938 | -1.020238212 | 0.00645311 | 0.01912234 | 111.179397 | 65.818489  | 74.5387776 | 35.04883255 | 53.62250692 | 35.61144462 | Cfap74         |
| ENSMUSG00000092014  | 0.323768503 | -1.626965453 | 0.00646289 | 0.01914795 | 31.3812813 | 88.4128957 | 166.469937 | 30.31250382 | 39.25933542 | 22.75175629 | Gm4468         |
| ENSMUSG000000104174 | 4.975451473 | 2.314827442  | 0.00651693 | 0.01929783 | 3.58643215 | 0.98236551 | 6.2115648  | 17.0507834  | 12.44808196 | 22.75175629 | Gm37701        |
| ENSMUSG00000080848  | 2.003276549 | 1.002361597  | 0.00653317 | 0.01932887 | 28.6914572 | 46.1711789 | 45.9655795 | 64.41407062 | 74.68849178 | 101.8882999 | Gm9385         |
| ENSMUSG00000040703  | 0.293029776 | -1.770880824 | 0.00654317 | 0.01935506 | 17.0355527 | 27.5062342 | 21.1193203 | 8.5253917   | 6.702813365 | 3.956827181 | Cyp2s1         |
| ENSMUSG00000032207  | 7.102332852 | 2.828292974  | 0.00655453 | 0.01937842 | 6.27625626 | 4.96925184 | 4.96925184 | 83.35938551 | 8.617902898 | 8.902861156 | Lipc           |
| ENSMUSG00000084803  | 0.46487007  | -1.105100552 | 0.00658008 | 0.01944386 | 39.4507536 | 41.2593513 | 48.4520254 | 18.94531489 | 17.2358058  | 23.74096308 | S5830444B04Rik |
| ENSMUSG00000022422  | 0.333787981 | -1.582996086 | 0.0065888  | 0.0194626  | 27.7948491 | 28.4885997 | 18.6346944 | 7.578125956 | 6.702813365 | 10.88127475 | Dscc1          |
| ENSMUSG00000092659  | 3.779250856 | 1.918100284  | 0.00660185 | 0.01949083 | 10.7592964 | 4.91182754 | 2.48462592 | 18.94531489 | 25.85370869 | 25.71937667 | Mir3100        |
| ENSMUSG00000039748  | 0.26351479  | -1.924044161 | 0.00661099 | 0.0195144  | 25.105025  | 39.2946203 | 16.1500685 | 2.841797233 | 6.17902898  | 9.892067951 | Exo1           |
| ENSMUSG00000030365  | 0.470892069 | -1.086531672 | 0.00661642 | 0.01952355 | 54.6930903 | 105.113109 | 90.688846  | 45.46875573 | 27.76879823 | 44.51430578 | Clec2i         |
| ENSMUSG00000039396  | 0.492121182 | -1.02291448  | 0.00667026 | 0.01965477 | 56.4863063 | 81.5363371 | 65.8425868 | 25.5761751  | 44.04705926 | 30.66541065 | Neil3          |
| ENSMUSG00000030370  | 4.226837911 | -1.228239777 | 0.00667507 | 0.01966205 | 87.8675876 | 64.861235  | 146.592929 | 27.47070659 | 60.32532029 | 39.56827181 | Efn2           |
| ENSMUSG00000043498  | 0.209838709 | -2.252647258 | 0.00667502 | 0.01966205 | 26.8982411 | 11.7883861 | 16.1500685 | 2.841797233 | 6.702813365 | 1.97841359  | 9330132A10Rik  |
| ENSMUSG00000080658  | 0.171649495 | -2.542462483 | 0.00672651 | 0.01979274 | 116.559045 | 843.851971 | 214.920142 | 47.36328722 | 117.7780063 | 36.60065142 | Rbfox1         |
| ENSMUSG00000035000  | 0.436624709 | -1.195534318 | 0.00673032 | 0.01980048 | 273.465451 | 263.273956 | 252.189531 | 206.5039323 | 79.47621561 | 58.36320091 | Dpp4           |
| ENSMUSG00000038670  | 0.084411908 | -3.566409654 | 0.00674969 | 0.01985399 | 1049.0314  | 19177.7394 | 1756.63052 | 394.0625497 | 1240.978017 | 220.5931153 | Mybpc2         |
| ENSMUSG00000060459  | 0.481527621 | -1.054309539 | 0.00676945 | 0.01990862 | 115.662437 | 118.866226 | 75.7810905 | 71.04493083 | 45.96214879 | 32.64382424 | Kng2           |
| ENSMUSG00000004814  | 0.497958603 | -1.005902283 | 0.00681745 | 0.02003442 | 52.0032661 | 82.5187026 | 70.818387  | 32.20703531 | 42.13196972 | 27.69779026 | Ccl24          |
| ENSMUSG00000028175  | 2.461543012 | 1.299562949  | 0.00682841 | 0.02005961 | 36.7609295 | 42.2417168 | 36.0270758 | 40.73242701 | 109.1601034 | 133.5429173 | Depdc1a        |
| ENSMUSG000000104432 | 0.260469414 | -1.940814123 | 0.00682916 | 0.02005961 | 13.4491206 | 50.1006409 | 78.2657164 | 12.31445468 | 7.660358132 | 16.81651552 | A430027C01Rik  |
| ENSMUSG00000016942  | 5.411463435 | 2.436018798  | 0.00687798 | 0.02018183 | 11.6559045 | 5.89419305 | 11.1808166 | 124.0918125 | 16.27826103 | 14.83810193 | Tmprss6        |
| ENSMUSG00000073940  | 2.189714459 | 1.130742753  | 0.0068862  | 0.02019887 | 97.730276  | 134.584075 | 330.455247 | 363.7500459 | 390.6782647 | 473.8300549 | Hbb-bt         |
| ENSMUSG00000026100  | 0.073637443 | -3.763416657 | 0.00689262 | 0.02021064 | 5.37964822 | 68.7655855 | 3.72693888 | 1.894531489 | 3.830179066 | 0           | Mstn           |
| ENSMUSG000000107481 | 0.465202741 | -1.140468497 | 0.00699413 | 0.02047611 | 40.3473617 | 49.1182754 | 67.0848998 | 24.89616393 | 24.89616393 | 27.69779026 | 4833403J16Rik  |
| ENSMUSG00000076749  | 0.249307697 | -2.004000673 | 0.00702903 | 0.02057109 | 14.3457286 | 35.3651583 | 16.1500685 | 4.736328722 | 3.830179066 | 7.913654361 | Tcrg-C1        |
| ENSMUSG00000073164  | 0.257062896 | -1.959806707 | 0.00705577 | 0.02063497 | 28.6914572 | 14.7354086 | 16.1500685 | 5.683594467 | 6.702813365 | 2.967620385 | 2410018L13Rik  |
| ENSMUSG000000105906 | 0.326925036 | -1.612968232 | 0.00709331 | 0.02072787 | 50.2100501 | 162.090309 | 49.6925184 | 39.78516127 | 16.27826103 | 29.67620385 | Iglic1         |
| ENSMUSG00000066682  | 0.38775091  | -1.36679793  | 0.00711777 | 0.02078731 | 61.8659546 | 78.5892406 | 67.0848998 | 36.94336403 | 33.51406683 | 9.892067951 | Pilrb2         |
| ENSMUSG00000031504  | 0.411452345 | -1.281202748 | 0.00713554 | 0.02080395 | 45.7270099 | 146.372461 | 91.931159  | 32.20703531 | 45.00406401 | 39.56827181 | Rab20          |
| ENSMUSG00000004709  | 0.402994979 | -1.311166229 | 0.00714438 | 0.02083963 | 63.6591706 | 117.883861 | 65.8425868 | 35.04688169 | 25.73307089 | 20.773427   | Cd242          |
| ENSMUSG000000104436 | 0.297986885 | -1.74667926  | 0.00715142 | 0.02085374 | 21.5185929 | 63.853758  | 95.6580979 | 27.47070659 | 15.32071626 | 10.88127475 | Gm37423        |
| ENSMUSG00000028838  | 0.257248297 | -1.958766568 | 0.00718    | 0.02092172 | 20.6129849 | 144.40773  | 37.2693888 | 15.15625191 | 20.1084401  | 16.81651552 | Ext1           |
| ENSMUSG00000025207  | 0.274286717 | 1.1455736801 | 0.00728901 | 0.02119522 | 35.8643215 | 38.3122548 | 54.6617702 | 219.7656527 | 62.24040982 | 70.23368245 | Sam4g          |
| ENSMUSG00000036923  | 0.459279902 | -1.122554441 | 0.00730091 | 0.02121973 | 42.1405777 | 34.3827928 | 40.9963277 | 18.94531489 | 19.15089533 | 15.82730872 | Stox1          |
| ENSMUSG00000037991  | 0.342708407 | -1.544946513 | 0.00730124 | 0.02121973 | 20.6129849 | 43.2240823 | 32.3001369 | 7.578125956 | 10.53299243 | 14.83810193 | Rmi2           |
| ENSMUSG00000020573  | 0.413899804 | -1.272646528 | 0.00737763 | 0.02142319 | 26.219849  | 262.291591 | 185.104631 | 159.1406451 | 73.73094702 | 37.58985821 | Pik3cg         |
| ENSMUSG00000027297  | 4.921740218 | 2.299168511  | 0.00738936 | 0.0214473  | 6.27625626 | 1.96473102 | 2.48462592 | 14.20898617 | 27.76879823 | 11.87048154 | Ltk            |
| ENSMUSG00000037413  | 2.440832061 | 1.287373035  | 0.00738976 | 0.0214473  | 11.6559045 | 12.7707516 | 14.9077555 | 28.41797233 | 37.34424589 | 29.67620385 | Lyg6d          |
| ENSMUSG00000028017  | 0.371592766 | -1.42820568  | 0.00739764 | 0.02146645 | 43.9337938 | 124.760419 | 45.9655795 | 33.15430106 | 23.93861916 | 22.75175629 | Ebf            |
| ENSMUSG00000031937  | 0.346095807 | -1.530756631 | 0.00739962 | 0.0214685  | 44.8304019 | 55.0124684 | 53.4194572 | 27.47070659 | 5.745268599 | 19.7841359  | Vstm5          |
| ENSMUSG00000000730  | 0.174173179 | -2.521405614 | 0.0074121  | 0.02150099 | 5.37964822 | 21.6120412 | 28.5731981 | 4.736328722 | 2.872634299 | 1.97841359  | Dnmt3l         |
| ENSMUSG00000056880  | 0.147781294 | -2.758464424 | 0.00741684 | 0.021511   | 3.58643215 | 90.3776267 | 23.6039462 | 3.789062978 | 7.660358132 | 5.935240771 | Gad1l          |
| ENSMUSG00000027716  | 0.485437879 | -1.042641409 | 0.00743547 | 0.02155387 | 61.8659546 | 72.6950476 | 70.818387  | 19.89258063 | 39.25933542 | 40.5574786  | Trpc3          |
| ENSMUSG00000031725  | 0.457121657 | -1.129349925 | 0.00743927 | 0.02156118 | 454.580275 | 199.420198 | 325.485995 | 239.6582333 | 109.1601034 | 98.92067951 | Ces1f          |
| ENSMUSG00000029923  | 0.342041747 | -1.547755674 | 0.00744406 | 0.02157131 | 23.311809  | 60.9066615 | 28.5731981 | 12.31445468 | 11.4905372  | 14.83810193 | Rab19          |
| ENSMUSG00000041653  | 0.409573206 | -1.004122742 | 0.00747909 | 0.02166536 | 1551.1319  | 616.925539 | 613.702602 | 345.7519967 | 498.8808233 | 543.0745305 | Pnp1a3         |
| ENSMUSG00000021940  | 0.281812119 | -1.82719444  | 0.00759669 | 0.02196085 | 19.7253768 | 13.7531171 | 24.8462592 | 5.683594467 | 6.702813365 | 3.956827181 | Ptpn20         |
| ENSMUSG00000032218  | 0.449581264 | -1.15334618  | 0.00768836 | 0.02218733 | 107.592964 | 140.478268 | 109.32354  | 23.68146361 | 70.85831272 | 66.27685527 | Ccnb2          |
| ENSMUSG00000037962  | 0.428877079 | -1.22136388  | 0.00772393 | 0.02227081 | 36.7609295 | 31.4356962 | 39.7540147 | 15.15625191 | 19.15089533 | 11.87048154 | Rfina          |
| ENSMUSG00000061816  | 0.080280334 | -3.638809562 | 0.00774017 | 0.02230918 | 2092.68316 | 32587.0286 | 3247.40608 | 676.3477415 | 2056.806158 | 311.6001405 | Myf1           |
| ENSMUSG00000051225  | 0.36889445  | -1.438720009 | 0.00775484 | 0.02234075 | 100.4201   | 41.2593513 | 63.3579609 | 34.1015668  | 29.68388776 | 11.87048154 | Fam83a         |
| ENSMUSG00000049958  | 0.241490755 | -2.049960138 | 0.00777046 | 0.02236473 | 13.4491206 | 14.7354826 | 32.3001369 | 7.578125956 | 6.702813365 | 4.946033976 | 3110021N24Rik  |
| ENSMUSG000000102212 | 5.650431811 | 2.498361124  | 0.00777116 | 0.02236473 | 1.79321607 | 3.92946203 | 7.45387776 | 49.25781871 | 11.4905372  | 11.87048154 | C230085N15Rik  |
| ENSMUSG00000058101  | 0.285686372 | -1.807495878 | 0.00782895 | 0.02251175 | 14.3457286 | 21.6120412 | 42.2386406 | 8.5253917   | 7.660358132 | 5.935240771 | 1700084J12Rik  |
| ENSMUSG00000061086  | 0.47668352  | -1.068896345 | 0.0078368  | 0.0225266  | 21.1599497 | 447.958671 | 726.753081 | 243.4472963 | 237.4711021 | 179.0464299 | Myf4           |
| ENSMUSG00000047638  | 0.336097654 | -1.57304762  | 0.00797512 | 0.022885   | 52.8998742 | 40.2769858 | 34.7847629 | 24.62890936 | 12.44808196 | 5.935240771 | Nrlh4          |
| ENSMUSG00000031461  | 0.06538778  | -3.934835139 | 0.00798114 | 0.02289837 | 324.572109 | 5504.19394 | 695.695257 | 80.51758828 | 333.2255787 | 12.85968834 | Myom2          |
| ENSMUSG00000015083  | 2.343279429 | 1.228529002  | 0.00810451 | 0.02322058 | 43.0371858 | 21.6120412 | 31.057824  | 111.7773578 | 54.58005169 | 58.36320091 | C8g            |
|                     |             |              |            |            |            |            |            |             |             |             |                |

|                     |             |              |            |             |            |             |             |             |             |              |               |
|---------------------|-------------|--------------|------------|-------------|------------|-------------|-------------|-------------|-------------|--------------|---------------|
| ENSMUSG00000051149  | 2.599543279 | 1.378258174  | 0.00845667 | 0.02408157  | 45.7270099 | 21.6120412  | 11.1808166  | 63.46680488 | 65.11304412 | 78.14733682  | Adnp          |
| ENSMUSG00000061959  | 59.04023156 | 5.883626475  | 0.00848034 | 0.02414078  | 0.89660804 | 0           | 0           | 64.41407062 | 0.957544766 | 0            | Ces1e         |
| ENSMUSG00000080504  | 0.497378221 | -1.007584757 | 0.00854534 | 0.02430519  | 50.2100501 | 47.2078925  | 21.78711212 | 21.06598486 | 31.65461744 | C23003516Rik |               |
| ENSMUSG00000039814  | 0.273259335 | -1.871657312 | 0.00854789 | 0.02430833  | 17.9321607 | 25.5415032  | 16.1500685  | 8.5253917   | 4.787723832 | 2.967620385  | Xkr5          |
| ENSMUSG00000010955  | 0.437547951 | -1.192486965 | 0.0085858  | 0.02440374  | 32.2778893 | 48.1359099  | 65.8425868  | 24.62890936 | 18.19335056 | 20.7733427   | Gm44891       |
| ENSMUSG00000044164  | 3.053403568 | 1.610418283  | 0.00860691 | 0.02444808  | 11.6559045 | 6.87655855  | 9.93850367  | 32.20703531 | 16.27826103 | 38.57906501  | Rnf182        |
| ENSMUSG00000050967  | 0.350431573 | -1.512795333 | 0.00861529 | 0.02445822  | 29.5880652 | 23.5767722  | 43.4809536  | 16.10351766 | 6.702813365 | 10.88127475  | Creg2         |
| ENSMUSG00000022304  | 10.43904445 | 3.383917754  | 0.00868709 | 0.02464157  | 3.58643215 | 2.94709652  | 0           | 51.1523502  | 17.2358058  | 1.97841359   | Dpys          |
| ENSMUSG00000075265  | 3.656299649 | 1.87038431   | 0.0087511  | 0.02481473  | 10.7592964 | 3.92946203  | 3.72693888  | 18.94531489 | 19.15089533 | 30.66541065  | Tnk2os        |
| ENSMUSG00000096991  | 0.430477732 | -1.215989484 | 0.00891894 | 0.02524375  | 53.7964822 | 103.148378  | 150.319868  | 40.73242701 | 59.36777552 | 31.65461744  | Gm26789       |
| ENSMUSG00000079564  | 4.208949967 | 2.07346036   | 0.00895737 | 0.02533972  | 6.27625626 | 2.94709652  | 3.72693888  | 21.78711212 | 9.575447664 | 23.74096308  | Gm11149       |
| ENSMUSG00000025129  | 0.083062063 | -3.589666485 | 0.00896211 | 0.02534883  | 1.79321607 | 161.107943  | 21.1193203  | 4.736328722 | 10.53299243 | 0            | Ppp1r27       |
| ENSMUSG00000085501  | 0.259000915 | -1.948970901 | 0.00898177 | 0.02538735  | 12.5525125 | 33.4004273  | 54.6617702  | 11.36718893 | 10.53299243 | 3.956827181  | Gm11772       |
| ENSMUSG000000110682 | 0.234161189 | -2.094426121 | 0.00899367 | 0.02541243  | 15.2423366 | 25.5415032  | 12.4231296  | 3.789062978 | 6.702813365 | 1.97841359   | AS30010L16Rik |
| ENSMUSG00000027261  | 57.32967578 | 5.841210215  | 0.00900569 | 0.0254421   | 0          | 0           | 1.24231296  | 62.51953913 | 0.957544766 | 0            | Haol1         |
| ENSMUSG00000082902  | 0.463578282 | -1.109115116 | 0.00901953 | 0.02546406  | 38.5541456 | 52.0653719  | 47.2078925  | 15.15625191 | 22.02352963 | 26.70858347  | Ccl19-ps1     |
| ENSMUSG00000081723  | 0.215771556 | -2.212423403 | 0.00902521 | 0.02547579  | 20.6219849 | 48.1359099  | 11.1808166  | 3.789062978 | 10.53299243 | 2.967620385  | Gm15931       |
| ENSMUSG00000018924  | 6.939209515 | 2.794771327  | 0.00905088 | 0.02553538  | 19.7253768 | 10.8060206  | 7.45387776  | 237.7637019 | 21.06598486 | 5.935240771  | Alox15        |
| ENSMUSG00000031530  | 0.426102685 | -1.230726952 | 0.0090608  | 0.02555047  | 144.353894 | 52.0653719  | 67.0848998  | 41.67969276 | 40.21688019 | 30.66541065  | Dusp4         |
| ENSMUSG00000023903  | 4.259921699 | -1.943851018 | 0.00914775 | 0.02576125  | 16.1389447 | 54.0301029  | 22.3616333  | 12.31445468 | 3.830179066 | 7.913654361  | Mmp25         |
| ENSMUSG00000056656  | 2.734875285 | 1.451475045  | 0.00914782 | 0.02576125  | 15.2423366 | 15.7178481  | 13.6654426  | 26.52344084 | 66.07058888 | 29.67620385  | Apol8         |
| ENSMUSG000000104512 | 0.212791683 | -2.232486329 | 0.00917989 | 0.02583856  | 8.06947233 | 18.6649446  | 37.2693888  | 2.841797233 | 6.702813365 | 3.956827181  | Gm37165       |
| ENSMUSG00000024292  | 3.456061458 | 1.789128873  | 0.00925819 | 0.02604148  | 10.7592964 | 7.85892406  | 14.9077555  | 70.09766509 | 18.19335056 | 26.70858347  | Cyp4f14       |
| ENSMUSG00000078783  | 0.27294382  | -1.873324061 | 0.00935688 | 0.02630142  | 16.1389447 | 25.5415032  | 26.0885721  | 2.841797233 | 4.787723832 | 10.88127475  | Gm9733        |
| ENSMUSG00000051747  | 0.070968578 | -3.816675784 | 0.00936253 | 0.02630849  | 2105.23567 | 33157.783   | 3560.46894  | 530.4688169 | 2094.150404 | 130.575297   | Ttn           |
| ENSMUSG000000107556 | 0.261764783 | -1.933657078 | 0.00943362 | 0.02649495  | 10.7592964 | 17.6825791  | 31.057824   | 4.736328722 | 5.745268599 | 4.946033976  | Gm44237       |
| ENSMUSG00000078193  | 2.419902169 | 1.274948724  | 0.00946178 | 0.02656073  | 24.208417  | 47.1535444  | 74.5387776  | 67.25586786 | 133.0987225 | 150.3594329  | Gm2000        |
| ENSMUSG00000051378  | 0.43880966  | -1.188332809 | 0.00949902 | 0.02665633  | 41.2439697 | 39.2946203  | 49.6925184  | 11.36718893 | 23.93861916 | 21.76254949  | Kif18b        |
| ENSMUSG000000383619 | 0.312335999 | -1.678829233 | 0.00952874 | 0.02672635  | 17.9321607 | 15.7178481  | 28.5731981  | 5.683594467 | 6.702813365 | 6.924447566  | Gm14414       |
| ENSMUSG00000047759  | 0.337514844 | -1.566977142 | 0.00954798 | 0.02677134  | 29.5880652 | 17.6825791  | 29.815511   | 12.31445468 | 6.702813365 | 6.924447566  | Hs3st3a1      |
| ENSMUSG00000027570  | 0.382174514 | -1.387696521 | 0.00955105 | 0.02677548  | 26.0016331 | 29.4709652  | 36.0270758  | 8.5253917   | 9.575447664 | 16.1651552   | Col9a3        |
| ENSMUSG00000095178  | 0.259548107 | -1.945926129 | 0.00955988 | 0.02679577  | 13.4491206 | 26.52344084 | 60.873335   | 6.630860211 | 13.40562673 | 5.935240771  | Gm22716       |
| ENSMUSG00000102319  | 0.39533437  | -1.338854708 | 0.00957599 | 0.02683195  | 34.9677134 | 65.818489   | 113.050479  | 20.83984638 | 29.68388776 | 33.63303103  | Gm37626       |
| ENSMUSG00000061947  | 55.6471119  | 5.798234908  | 0.00966255 | 0.02701621  | 0.89660804 | 0           | 0           | 60.62500765 | 0           | 0.989206795  | Serpin10      |
| ENSMUSG00000102326  | 0.403621118 | -1.308926434 | 0.00966267 | 0.02701621  | 43.9337938 | 55.0124684  | 134.1698    | 32.20703531 | 28.72634299 | 32.64382424  | Gm37788       |
| ENSMUSG00000028348  | 0.097168195 | -3.363372018 | 0.00967626 | 0.0270458   | 34.9677134 | 392.946203  | 124.231296  | 7.578125956 | 43.08951449 | 2.967620385  | Cavin4        |
| ENSMUSG00000001155  | 5.231357185 | 2.387185277  | 0.00972577 | 0.02717905  | 6.27625626 | 4.91812754  | 9.93850367  | 85.253917   | 12.44808196 | 11.87048154  | Ftcd          |
| ENSMUSG00000085645  | 2.410806574 | 1.269515904  | 0.00972862 | 0.02717966  | 38.5541456 | 12.707516   | 19.8770073  | 52.09961595 | 55.53796445 | 65.28764848  | Hoxb5os       |
| ENSMUSG00000029153  | 0.415048676 | -1.268647553 | 0.00974205 | 0.02720641  | 58.2795224 | 207.279122  | 129.200548  | 45.46875573 | 73.73094702 | 44.51430578  | Ociad2        |
| ENSMUSG00000006457  | 0.073133226 | -3.773329195 | 0.00981419 | 0.027339876 | 1443.53894 | 27401.1211  | 2426.23721  | 512.4707678 | 1651.764722 | 122.6616426  | Actn3         |
| ENSMUSG00000021974  | 0.309003586 | -1.694304515 | 0.00982932 | 0.02743186  | 19.7253768 | 43.2240823  | 72.0541516  | 7.578125956 | 12.06598486 | 12.06598486  | Fgf9          |
| ENSMUSG00000027887  | 0.113639453 | -3.137464307 | 0.00986698 | 0.02752783  | 111.179397 | 1787.90522  | 284.489668  | 67.25586786 | 154.1647074 | 26.70858347  | Sypl2         |
| ENSMUSG00000022236  | 0.305166482 | -1.712331582 | 0.00989274 | 0.02757677  | 17.9321607 | 20.6296757  | 34.7847629  | 3.789062978 | 9.575447664 | 8.902861156  | Ropn1l        |
| ENSMUSG00000092021  | 0.445838016 | -1.165408457 | 0.00989079 | 0.02757677  | 31.3812813 | 55.9040832  | 17.0507834  | 19.15089533 | 25.71937667 | Gbp11        |               |
| ENSMUSG00000028262  | 0.184967242 | -2.434658308 | 0.00990055 | 0.02758484  | 31.3812813 | 10.8060206  | 9.93850367  | 1.894531489 | 1.915089533 | 5.935240771  | Cla3a2        |
| ENSMUSG00000073179  | 0.429734895 | -1.218481163 | 0.00990056 | 0.02758484  | 41.2439697 | 48.1359099  | 60.688846   | 31.25976957 | 26.81125346 | 18.79492911  | Gm10478       |
| ENSMUSG00000001656  | 0.100415277 | -3.315949322 | 0.00991216 | 0.02760545  | 10.7592964 | 34.3827928  | 40.9963277  | 0           | 8.617902898 | 0            | Hoxc11        |
| ENSMUSG00000070424  | 0.240369854 | -2.056672124 | 0.00991216 | 0.02760545  | 23.311809  | 85.4657992  | 31.057824   | 5.683594467 | 22.98107439 | 4.946033976  | Art5          |
| ENSMUSG00000061462  | 0.092056791 | -3.441332037 | 0.01001271 | 0.02785567  | 328.158542 | 4372.50887  | 557.798519  | 70.09766509 | 374.4000037 | 39.56827181  | Obscn         |
| ENSMUSG000000304027 | 0.373322797 | -1.421504485 | 0.01004595 | 0.02792105  | 32.2778893 | 97.2541852  | 60.873335   | 32.20703531 | 24.89616393 | 13.84889513  | Lilra6        |
| ENSMUSG00000106535  | 3.4358277   | 1.78065769   | 0.01005379 | 0.02793756  | 10.7592964 | 3.92946203  | 3.72693888  | 20.83984638 | 21.06598486 | 22.75175629  | Gm43031       |
| ENSMUSG00000032537  | 0.432675757 | -1.208641806 | 0.01005646 | 0.02794035  | 48.416834  | 63.853758   | 125.473609  | 25.5761751  | 41.17442496 | 35.61144462  | Ephb1         |
| ENSMUSG00000020475  | 0.128059727 | -2.965111253 | 0.0100726  | 0.0279713   | 415.129521 | 5937.41713  | 967.761795  | 197.0312748 | 584.1023075 | 156.2946736  | Pgam2         |
| ENSMUSG00000033779  | 0.476373004 | -1.069836437 | 0.01008147 | 0.02799128  | 162.286055 | 139.495902  | 62.115648   | 45.46875573 | 61.2826505  | 67.2606207   | Kif20a        |
| ENSMUSG00000038155  | 0.401293514 | -1.317270257 | 0.01011894 | 0.0280814   | 70.8320349 | 223.979336  | 69.5695257  | 50.20508446 | 53.62250692 | 42.53589219  | Gstp2         |
| ENSMUSG00000106475  | 3.301649071 | 1.723186786  | 0.01012433 | 0.02808707  | 4.48304019 | 8.66128957  | 8.69619071  | 34.1015668  | 22.98107439 | 14.83810193  | Gm43011       |
| ENSMUSG00000026068  | 0.364494665 | -1.456030398 | 0.01019916 | 0.02826196  | 69.0388189 | 109.042571  | 69.6919071  | 60.62500765 | 22.98107439 | 12.85968834  | l18rap        |
| ENSMUSG00000105936  | 0.38610824  | -1.372922753 | 0.01025607 | 0.02841028  | 20.6219849 | 45.1888133  | 47.2078925  | 12.31445468 | 16.27826103 | 14.83810193  | Gm43544       |
| ENSMUSG00000024301  | 0.47285042  | -1.080544217 | 0.01026341 | 0.02842123  | 73.964822  | 63.853758   | 44.7232665  | 35.99609829 | 20.1084040  | 20.7733427   | Kifc5b        |
| ENSMUSG00000065420  | 0.344210398 | -1.538637414 | 0.0102916  | 0.02848519  | 28.6914572 | 57.95595649 | 47.2078925  | 26.52344084 | 11.4905372  | 7.913654361  | Mir142b       |
| ENSMUSG00000090673  | 2.259259514 | 1.175849998  | 0.01034426 | 0.02861207  | 47.520226  | 31.4356962  | 21.193203   | 107.9882949 | 54.58005169 | 65.28764848  | Gm340         |
| ENSMUSG00000078942  | 0.451449619 | -1.147363101 | 0.01035853 | 0.02864683  | 121.938693 | 130.654613  | 63.3579609  | 71.99219658 | 39.25933542 | 31.65461744  | Naip6         |
| ENSMUSG00000017300  | 0.076778826 | -3.703157834 | 0.01036852 | 0.02866501  | 549.620727 | 11947.5293  | 1447.2946   | 174.296897  | 834.9790363 | 61.3308213   | Tnnc2         |
| ENSMUSG00000026253  | 0.12743001  | -2.972223024 | 0.01038041 | 0.02868369  | 4.48304019 | 43.2240823  | 34.7847629  | 7.578125956 | 2.872634299 | 0            | Chnrg         |
| ENSMUSG00000023153  | 0.223521473 | -2.161514663 | 0.01042141 | 0.02878369  | 18.8287688 | 148.337192  | 22.3616333  | 9.472657445 | 21.06598486 | 11.87048154  | Tmem52        |
| ENSMUSG00000025478  | 0.320022096 | -1.643756577 | 0.01042174 | 0.02878369  | 23.311809  | 21.6120412  | 27.3308851  | 6.630860211 | 12.44808196 | 3.956827181  | Dpysl4        |
| ENSMUSG00000032053  | 3.699811444 | 1.887451747  | 0.01047056 | 0.02890426  | 33.1744974 | 53.0477374  | 47.2078925  | 366.5918431 | 28.72634299 | 9            |               |

|                     |             |              |            |            |            |            |            |             |             |             |               |
|---------------------|-------------|--------------|------------|------------|------------|------------|------------|-------------|-------------|-------------|---------------|
| ENSMUSG00000097051  | 0.439227715 | -1.186959005 | 0.0109771  | 0.03007321 | 43.9337938 | 117.883861 | 135.412113 | 49.25781871 | 37.34424589 | 43.52509899 | Gm26836       |
| ENSMUSG00000019102  | 2.204637333 | 1.140541349  | 0.01102447 | 0.03018511 | 65.4523867 | 51.0830064 | 24.8462592 | 129.775407  | 117.7780063 | 66.27685527 | Aldh3a1       |
| ENSMUSG00000009471  | 0.128761373 | -2.957228234 | 0.01105259 | 0.03025223 | 5.37964822 | 68.7655855 | 22.3616333 | 4.736328722 | 7.660358132 | 0           | Myod1         |
| ENSMUSG00000069804  | 0.446876866 | -1.162050735 | 0.01109184 | 0.03034481 | 43.9337938 | 99.2189163 | 122.988983 | 35.99609829 | 48.83478309 | 33.63303103 | Gm10277       |
| ENSMUSG00000040121  | 0.467710531 | -1.096312183 | 0.01110127 | 0.03036567 | 39.4507536 | 54.0301029 | 86.9619071 | 29.36523808 | 27.76879823 | 26.70858347 | Rep15         |
| ENSMUSG000000031972 | 0.07662332  | -3.706072643 | 0.01113855 | 0.03045577 | 4623.80765 | 85378.3686 | 10113.6698 | 1335.6447   | 5817.084456 | 518.3443606 | Acta1         |
| ENSMUSG00000079168  | 0.438388683 | -1.189717538 | 0.01117536 | 0.0305534  | 39.4507536 | 55.9948339 | 58.3887091 | 22.73437787 | 31.59897729 | 12.85968834 | Cd209g        |
| ENSMUSG00000107136  | 0.187836435 | -2.41245116  | 0.01123905 | 0.03070251 | 7.1728643  | 23.5767722 | 36.0270758 | 3.789062978 | 7.660358132 | 0.989206795 | Gm42466       |
| ENSMUSG00000043664  | 0.413029315 | -1.275683915 | 0.01141258 | 0.03110063 | 26.8982411 | 42.2417168 | 33.5424499 | 12.31445468 | 19.15089533 | 10.88127475 | Tmem221       |
| ENSMUSG00000107370  | 0.377174272 | -1.406696826 | 0.01144039 | 0.03117136 | 18.8287688 | 27.5062342 | 36.0270758 | 9.472657445 | 11.4905372  | 9.892067951 | Gm43588       |
| ENSMUSG00000097357  | 2.465829741 | 1.302073189  | 0.01146244 | 0.03122636 | 18.8287688 | 8.84128957 | 12.4231296 | 28.41797233 | 33.51406683 | 37.58985821 | Gm16793       |
| ENSMUSG00000110647  | 0.326161115 | -1.616343301 | 0.01150897 | 0.03133258 | 23.311809  | 28.4885997 | 16.1500685 | 5.683594467 | 5.745268599 | 10.88127475 | Gm17745       |
| ENSMUSG00000039021  | 3.71224612  | 1.892292363  | 0.01153365 | 0.03138979 | 11.6559045 | 5.89419305 | 2.48462592 | 17.0507834  | 38.30179066 | 20.7733427  | Ttc16         |
| ENSMUSG00000035298  | 0.265584663 | -1.91275626  | 0.01154277 | 0.0314095  | 28.6914572 | 11.7883861 | 13.6654426 | 4.736328722 | 4.787723832 | 4.946033976 | Khlh35        |
| ENSMUSG00000044471  | 3.075514843 | 1.620827939  | 0.01164942 | 0.03167918 | 10.7592964 | 11.7883861 | 6.2115648  | 47.36328722 | 18.19335056 | 23.74096308 | Lncpint       |
| ENSMUSG00000072591  | 2.101644118 | -2.310116771 | 0.01170778 | 0.03180697 | 9.86608037 | 13.7531171 | 44.7232665 | 2.841797233 | 7.660358132 | 2.967620385 | 5930412G12Rik |
| ENSMUSG00000078616  | 0.243518027 | -1.037899522 | 0.01172492 | 0.03184396 | 15.2423366 | 24.5591377 | 27.3308851 | 5.683594467 | 9.575447664 | 0.989206795 | Trim30c       |
| ENSMUSG00000063018  | 0.33812547  | -1.564369399 | 0.01173409 | 0.0318578  | 19.7253768 | 22.5944067 | 23.6039462 | 6.630860211 | 4.787723832 | 10.88127475 | 2010204K13Rik |
| ENSMUSG00000027489  | 0.414926839 | -1.269071116 | 0.01178745 | 0.03198715 | 25.105025  | 26.5238687 | 37.2693888 | 11.36718893 | 11.4905372  | 13.84889513 | Necab3        |
| ENSMUSG00000027022  | 0.073760343 | -3.761010816 | 0.01180021 | 0.0320166  | 438.44133  | 8613.38077 | 32.6353492 | 120.3027495 | 576.4419494 | 13.65461744 | Krlb1c        |
| ENSMUSG00000104291  | 0.323308636 | -1.629016051 | 0.01187067 | 0.03218697 | 59.1761304 | 206.296757 | 341.636064 | 108.9355606 | 61.28286505 | 25.71937667 | A130071D04Rik |
| ENSMUSG00000087594  | 2.295140854 | 1.198582695  | 0.01188573 | 0.03222261 | 17.9321607 | 20.6296757 | 12.4231296 | 39.78516127 | 28.72634299 | 49.46033976 | BC039771      |
| ENSMUSG00000030325  | 0.341750943 | -2.548892774 | 0.01191396 | 0.03227828 | 17.0355527 | 41.2593517 | 23.6039462 | 7.578125956 | 10.32299243 | 9.892067951 | Krlb1c        |
| ENSMUSG00000104154  | 0.267835885 | -1.900578825 | 0.01208026 | 0.03269715 | 10.7592964 | 34.3827928 | 55.9040832 | 9.472657445 | 12.44808196 | 4.946033976 | Gm38104       |
| ENSMUSG00000057132  | 0.40723254  | -1.296075248 | 0.01213885 | 0.03284514 | 26.8982411 | 29.4709652 | 36.0270758 | 15.15625191 | 14.3631715  | 7.913654361 | Rgpr1n        |
| ENSMUSG00000034959  | 0.339748805 | -1.557459617 | 0.01215051 | 0.03286082 | 43.9337938 | 67.78322   | 74.5387776 | 41.67969276 | 10.53299243 | 10.88127475 | Rubcl         |
| ENSMUSG00000026390  | 0.110810351 | -3.173835441 | 0.01221863 | 0.03301844 | 1.79321607 | 55.9948339 | 19.8770073 | 6.630860211 | 0.957544766 | 0.989206795 | Marco         |
| ENSMUSG00000097239  | 3.01601799  | 1.592645034  | 0.01225448 | 0.03309398 | 8.06947233 | 7.85892406 | 4.96925184 | 15.15625191 | 24.89616393 | 23.74096308 | Gm27029       |
| ENSMUSG00000026117  | 0.338930348 | -1.560939271 | 0.01230975 | 0.03322722 | 19.7253768 | 52.0653719 | 36.0270758 | 18.94531489 | 9.575447664 | 7.913654361 | Zap70         |
| ENSMUSG00000039661  | 0.393621113 | -1.34512049  | 0.01232293 | 0.03325744 | 23.311809  | 59.924296  | 49.6925184 | 12.31445468 | 20.1084401  | 19.7841359  | Dusp26        |
| ENSMUSG00000097633  | 0.419963451 | -1.251664317 | 0.01236247 | 0.03334272 | 42.1405777 | 38.3122548 | 60.873335  | 13.26172042 | 15.32071626 | 30.66541065 | Gm16617       |
| ENSMUSG00000036634  | 0.381647987 | -1.389685515 | 0.01239347 | 0.0334102  | 26.0016331 | 58.9419305 | 31.057824  | 12.31445468 | 20.1084401  | 11.87048154 | Mag           |
| ENSMUSG00000107225  | 0.340672265 | -1.553543595 | 0.01247571 | 0.03359416 | 17.0355527 | 53.0477374 | 80.7503423 | 17.0507834  | 17.2358058  | 16.81651552 | Gm43637       |
| ENSMUSG0000007908   | 0.460362372 | -1.119158176 | 0.0125129  | 0.03368349 | 52.0032661 | 51.0830064 | 45.9655795 | 22.73437787 | 13.40562673 | 32.64382424 | Hmgcll1       |
| ENSMUSG00000019767  | 0.382209148 | -1.387655787 | 0.01251107 | 0.03368349 | 67.2456028 | 33.4004273 | 27.3308851 | 12.31445468 | 22.02352963 | 14.83810193 | Ccdc170       |
| ENSMUSG00000050107  | 0.340730338 | -1.553297688 | 0.01254516 | 0.03375408 | 35.8643215 | 45.1888133 | 29.815511  | 11.36718893 | 4.787723832 | 21.76254949 | Haspin        |
| ENSMUSG00000051969  | 0.170988254 | -2.548030874 | 0.01263673 | 0.03396377 | 24.208417  | 28.4885997 | 3.72693888 | 1.894531489 | 1.915089533 | 9.352420771 | Tlr11         |
| ENSMUSG00000085862  | 2.927392817 | 1.549616349  | 0.01267289 | 0.03403773 | 10.7592964 | 5.89419305 | 6.2115648  | 17.99804914 | 22.02352963 | 27.69779026 | Gm13483       |
| ENSMUSG00000109341  | 0.297256709 | -1.750218722 | 0.0126809  | 0.03405379 | 16.1389447 | 17.6825791 | 44.7232665 | 5.683594467 | 10.53299243 | 6.924447566 | Gm30873       |
| ENSMUSG00000039521  | 0.386651119 | -1.370895706 | 0.01270016 | 0.03408372 | 18.8287688 | 31.4359662 | 32.3001369 | 12.31445468 | 10.53299243 | 8.902861156 | Foxp3         |
| ENSMUSG00000022996  | 0.482716488 | -1.05075199  | 0.01270895 | 0.0340964  | 54.6930903 | 51.0830064 | 33.5424499 | 21.78711212 | 19.15089533 | 26.70858347 | Wnt10b        |
| ENSMUSG00000097194  | 0.398067767 | -1.328914041 | 0.01274182 | 0.03416273 | 34.9677134 | 79.5716061 | 48.4502054 | 20.83984638 | 12.44808196 | 31.65461744 | 9330175E14Rik |
| ENSMUSG00000025163  | 2.432658193 | 1.282533625  | 0.01275501 | 0.03419263 | 16.1389447 | 38.3122548 | 23.6039462 | 44.52148999 | 95.75447664 | 49.46033976 | Cd7           |
| ENSMUSG00000040694  | 0.140434521 | -2.832030477 | 0.01277126 | 0.03423074 | 91.4540198 | 1121.86141 | 187.589257 | 44.52148999 | 123.5232749 | 28.68699706 | Apobec2       |
| ENSMUSG00000089942  | 0.213581637 | -2.227140481 | 0.0127906  | 0.0342771  | 26.8982411 | 38.3122548 | 6.2115648  | 7.578125956 | 5.745268599 | 1.97841359  | Pira2         |
| ENSMUSG00000090592  | 0.302677771 | -1.724145368 | 0.01280516 | 0.03430973 | 17.0355527 | 69.747951  | 115.535105 | 12.31445468 | 22.02352963 | 26.70858347 | Gm17571       |
| ENSMUSG00000045776  | 0.254061358 | -1.97675113  | 0.0128282  | 0.03435591 | 38.5541456 | 178.790522 | 73.2964646 | 13.26172042 | 53.62250692 | 6.924447566 | Ltrm1         |
| ENSMUSG00000090582  | 2.158834119 | 1.110252394  | 0.01283601 | 0.03437133 | 17.0355527 | 22.5944067 | 13.6654426 | 33.15430106 | 44.04705926 | 38.57906501 | Gm17024       |
| ENSMUSG00000026204  | 0.491823086 | -1.023788638 | 0.01287671 | 0.03445833 | 60.0727385 | 75.6421441 | 125.473609 | 51.1523502  | 45.96214879 | 30.66541065 | Ptprn         |
| ENSMUSG00000086801  | 3.523809416 | 1.817135899  | 0.01294019 | 0.03460064 | 3.58643215 | 6.87655855 | 14.9077555 | 17.99804914 | 23.93861916 | 45.50351258 | Gm15943       |
| ENSMUSG00000087362  | 0.221509312 | -2.174560746 | 0.01293864 | 0.03460064 | 17.9321607 | 13.7531171 | 24.8462592 | 2.841797233 | 8.617902898 | 0.989206795 | Gm13710       |
| ENSMUSG00000070385  | 0.08539969  | -3.549625364 | 0.01299607 | 0.03473344 | 115.662437 | 1991.25488 | 234.797149 | 40.73242701 | 150.3345283 | 8.902861156 | Ampd1         |
| ENSMUSG00000019787  | 0.094481813 | -3.403819534 | 0.01301394 | 0.03477567 | 533.481782 | 7325.49959 | 1904.46577 | 154.4043163 | 735.3943806 | 32.64382424 | Trdn          |
| ENSMUSG00000097263  | 0.39030113  | -1.357340457 | 0.01301719 | 0.03477882 | 46.6236179 | 145.390095 | 258.401096 | 63.46680488 | 57.45268599 | 54.40637373 | Gm26804       |
| ENSMUSG00000030672  | 0.079268097 | -3.657115855 | 0.01306014 | 0.03487692 | 2244.20992 | 31480.8851 | 4534.4423  | 494.4727186 | 2425.460893 | 112.7695746 | Myfpl         |
| ENSMUSG00000024846  | 0.29383683  | -1.766912856 | 0.01307738 | 0.03491184 | 13.4491206 | 57.9955949 | 23.6039462 | 9.472657445 | 10.53299243 | 7.913654361 | Cst6          |
| ENSMUSG00000073008  | 3.873725391 | 1.953721685  | 0.01307584 | 0.03491184 | 11.6559045 | 23.5767722 | 2.48462592 | 68.2031336  | 19.15089533 | 60.3416145  | Gpr174        |
| ENSMUSG00000032589  | 0.408466883 | -1.291708799 | 0.01309343 | 0.03494914 | 27.7948491 | 33.4004273 | 21.193203  | 11.36718893 | 10.53299243 | 11.87048154 | Bsn           |
| ENSMUSG00000086247  | 2.098272192 | 1.069201839  | 0.01309752 | 0.03495448 | 65.4523867 | 43.2240823 | 21.1193203 | 82.41211977 | 100.5422005 | 91.99623195 | Gm15787       |
| ENSMUSG00000036587  | 0.240488531 | -2.05596     | 0.0131379  | 0.03502883 | 9.86268841 | 41.2593513 | 21.1193203 | 2.841797233 | 9.575447664 | 4.946033976 | Fut7          |
| ENSMUSG00000035165  | 0.477748341 | -1.065677231 | 0.01314791 | 0.03504997 | 34.9677134 | 37.3298893 | 34.7847629 | 15.15625191 | 16.27826103 | 19.7841359  | Kcne3         |
| ENSMUSG00000103034  | 3.028420804 | 1.598565684  | 0.01315715 | 0.03506344 | 21.5185929 | 15.7178481 | 3.72693888 | 33.15430106 | 58.41023075 | 34.62223783 | Gm8797        |
| ENSMUSG00000080875  | 0.33410737  | -1.581616289 | 0.01319364 | 0.03512343 | 18.8287688 | 15.7178481 | 32.3001369 | 8.5253917   | 6.702813365 | 6.924447566 | Gm7332        |
| ENSMUSG00000090256  | 0.259630786 | -1.94546663  | 0.01319431 | 0.03512343 | 23.311809  | 17.6825791 | 14.9077555 | 1.894531489 | 3.830179066 | 8.902861156 | Alms1-ps1     |
| ENSMUSG00000094840  | 0.410740445 | -1.28370108  | 0.01319681 | 0.03512452 | 22.4152009 | 38.3122548 | 28.5731981 | 13.26172042 | 10.53299243 | 12.85968834 | Muc3a         |
| ENSMUSG00000106772  | 0.373886608 | -1.419327296 | 0.01323321 | 0.03521025 | 26.8982411 | 70.7303165 | 9          |             |             |             |               |

|                     |             |              |            |            |            |            |            |             |             |             |               |
|---------------------|-------------|--------------|------------|------------|------------|------------|------------|-------------|-------------|-------------|---------------|
| ENSMUSG00000049092  | 3.177123878 | 1.667721343  | 0.01422835 | 0.03747193 | 19.7253768 | 9.82365508 | 2.48462592 | 35.99609829 | 36.38670112 | 31.65461744 | Gpr137c       |
| ENSMUSG000000100280 | 0.471707209 | -1.084036447 | 0.01441083 | 0.03788713 | 30.4846733 | 52.0653719 | 42.2386406 | 19.89258063 | 22.02352963 | 16.81651552 | Gm28417       |
| ENSMUSG000000040759 | 0.356198083 | -1.489248344 | 0.01447196 | 0.03802401 | 30.4846733 | 32.4180617 | 14.9077555 | 11.36718893 | 9.575447664 | 6.924447566 | Gm2m5         |
| ENSMUSG000000042045 | 0.094503768 | -3.40348433  | 0.01448433 | 0.03805212 | 16.1389447 | 298.639114 | 28.2657164 | 23.68164361 | 12.44808196 | 0.989206795 | Sln           |
| ENSMUSG000000074968 | 0.373849752 | -1.419469518 | 0.01455814 | 0.03819067 | 49.313442  | 19.6473102 | 28.5731981 | 15.15625191 | 10.53299243 | 10.88127475 | Ano3          |
| ENSMUSG000000031196 | 0.411576858 | -1.280766229 | 0.01456515 | 0.03820307 | 260.912939 | 153.249019 | 54.6617702 | 62.51953913 | 80.43376038 | 50.44954655 | F8            |
| ENSMUSG000000029228 | 2.076731748 | 1.054314875  | 0.01458021 | 0.03823063 | 83.3845474 | 40.2769858 | 28.5731981 | 92.83204296 | 111.0751929 | 114.7479882 | Lnx1          |
| ENSMUSG000000042846 | 3.853806963 | 1.946284309  | 0.01474006 | 0.03861961 | 4.48304019 | 2.94709652 | 4.96925184 | 9.472657445 | 15.32071626 | 22.75175629 | Lrrtm3        |
| ENSMUSG000000054256 | 0.47195891  | -1.083266835 | 0.01477494 | 0.03869286 | 50.2100501 | 51.0830064 | 91.931159  | 20.83984638 | 39.25933542 | 30.66541065 | Msi1          |
| ENSMUSG000000087135 | 3.012400184 | 1.590913438  | 0.0147884  | 0.03872207 | 10.7592964 | 6.87655855 | 3.72693888 | 17.99804914 | 22.02352963 | 25.71937667 | Gm16096       |
| ENSMUSG000000022512 | 0.371855431 | -1.427186252 | 0.01482612 | 0.03880874 | 135.387814 | 222.99697  | 55.9040832 | 89.04297998 | 33.51406683 | 31.65461744 | Cldn1         |
| ENSMUSG000000018238 | 0.387029126 | -1.369485953 | 0.01483174 | 0.03881738 | 19.7253768 | 29.4709652 | 31.057824  | 9.472657445 | 7.660358132 | 13.84889513 | Gdf9          |
| ENSMUSG000000029828 | 2.095138616 | 1.067045697  | 0.01486033 | 0.03888008 | 17.9321607 | 26.5238687 | 29.815511  | 56.83594467 | 35.42915636 | 62.32002809 | 4921507P07Rik |
| ENSMUSG000000034570 | 2.028972752 | 1.02074949   | 0.01486558 | 0.0388817  | 20.6219849 | 17.6825791 | 27.3308851 | 48.31055297 | 35.42915636 | 48.47113296 | ImpsJ         |
| ENSMUSG000000101556 | 0.336944304 | -1.569417957 | 0.0148637  | 0.0388817  | 15.2423366 | 24.5591377 | 17.3923814 | 6.630860211 | 6.702813365 | 5.935240771 | Gm28869       |
| ENSMUSG000000030068 | 3.240291731 | 1.696123708  | 0.01486854 | 0.03888339 | 10.7592964 | 15.7178481 | 18.6346944 | 96.62110594 | 22.02352963 | 26.70858347 | Gm20696       |
| ENSMUSG000000111864 | 0.380831357 | -1.392775823 | 0.01491694 | 0.03899174 | 24.208417  | 22.5944067 | 39.7540147 | 8.5253917   | 15.32071626 | 8.920261156 | Rpl26-ps6     |
| ENSMUSG000000039653 | 22.01096033 | 4.460150186  | 0.01495537 | 0.03908002 | 0.89660804 | 0.98236551 | 1.24231296 | 67.25586786 | 0.957544766 | 0           | Baat          |
| ENSMUSG000000105962 | 0.415530901 | -1.266972327 | 0.01496448 | 0.03909774 | 43.9337938 | 109.042571 | 168.954562 | 30.31250382 | 54.58005169 | 48.47113296 | Gm42432       |
| ENSMUSG000000061723 | 0.081583561 | -3.61557771  | 0.01506177 | 0.03930909 | 4157.57147 | 70703.7927 | 8550.8401  | 1131.035299 | 5330.651715 | 343.2545759 | Tnnt3         |
| ENSMUSG000000103558 | 0.303664241 | -1.719451064 | 0.01507876 | 0.03934731 | 13.4491206 | 21.6120412 | 22.3616333 | 7.578125956 | 2.872634299 | 6.924447566 | Gm38220       |
| ENSMUSG000000024430 | 2.281551069 | 1.190014947  | 0.01520561 | 0.03958601 | 14.3457286 | 9.82365508 | 19.8770073 | 31.25976957 | 31.59897729 | 36.60065142 | Cabyr         |
| ENSMUSG000000072955 | 2.464801894 | 1.301471696  | 0.0152445  | 0.0395655  | 9.86268841 | 13.7531171 | 8.69619071 | 22.73437787 | 31.59897729 | 25.71937667 | Tnmb15I       |
| ENSMUSG000000105304 | 0.364444674 | -1.456228279 | 0.01527262 | 0.03971734 | 28.6914572 | 54.0301029 | 93.1734719 | 10.41992319 | 29.68388776 | 23.74096308 | Gm43696       |
| ENSMUSG000000085779 | 2.053268573 | 1.037922348  | 0.01535984 | 0.03990705 | 60.9693465 | 232.820625 | 124.231296 | 285.1269891 | 265.2399003 | 307.6433133 | Atcaycs       |
| ENSMUSG000000053219 | 0.366071518 | -1.449802567 | 0.01536797 | 0.03991582 | 78.0048992 | 53.0477374 | 28.5731981 | 31.25976957 | 9.575447664 | 17.80572231 | Rae1te        |
| ENSMUSG000000038092 | 33.12424505 | 5.049815669  | 0.01541291 | 0.04001397 | 0          | 1.96473102 | 0          | 63.46680488 | 2.872634299 | 0           | Hsd3b5        |
| ENSMUSG000000031097 | 0.083533525 | -3.581500875 | 0.01543616 | 0.04006193 | 1536.78618 | 25474.7023 | 3503.32254 | 395.9570812 | 2019.461912 | 133.5429173 | Tnni2         |
| ENSMUSG000000044544 | 3.050818151 | 1.609196188  | 0.01567065 | 0.0405831  | 8.06947233 | 5.89419305 | 3.72693888 | 18.94531489 | 18.1935056  | 17.80572231 | 49215130I3Rik |
| ENSMUSG000000054204 | 2.029764956 | 1.021312675  | 0.01569966 | 0.04063271 | 24.208417  | 27.5062342 | 22.3616333 | 34.1015668  | 63.19795459 | 53.41716694 | Alkal2        |
| ENSMUSG000000054304 | 0.379766718 | -1.39681462  | 0.0157536  | 0.04075973 | 22.4152009 | 33.4004273 | 72.0541516 | 16.10351766 | 17.2358058  | 14.83810193 | D130007C19Rik |
| ENSMUSG000000090066 | 0.111784838 | -3.16120358  | 0.01578328 | 0.04081136 | 91.4540198 | 1018.71303 | 218.647081 | 18.94531489 | 119.6930958 | 9.892067951 | 1110002E22Rik |
| ENSMUSG000000031637 | 0.333203085 | -1.585526338 | 0.01582598 | 0.04091204 | 29.5880652 | 110.024937 | 31.057824  | 12.31445468 | 25.85370869 | 18.79492911 | Lrp2bp        |
| ENSMUSG000000052974 | 0.262616791 | -1.928968932 | 0.01582709 | 0.04091204 | 1120.76005 | 571.736725 | 781.414851 | 458.4766203 | 112.0327377 | 79.13654361 | Cyp2f2        |
| ENSMUSG000000052270 | 0.337822712 | -1.56566177  | 0.01585487 | 0.04097755 | 26.8982411 | 143.425364 | 45.9655795 | 26.52344084 | 27.76879823 | 18.79492911 | Fpr2          |
| ENSMUSG000000030483 | 9.185141687 | 3.199301976  | 0.01588961 | 0.04104205 | 6.27625626 | 0          | 0          | 34.1015668  | 19.15089533 | 6.924447566 | Cyp2b10       |
| ENSMUSG000000029425 | 2.211981225 | -2.237991603 | 0.01593584 | 0.04114879 | 15.2423366 | 18.6649446 | 21.1193203 | 0           | 5.745268599 | 5.935240771 | Epha5         |
| ENSMUSG000000089727 | 0.176360823 | -2.503397984 | 0.01600082 | 0.04130384 | 14.3457286 | 24.5591377 | 26.0885721 | 9.472657445 | 1.915089533 | 0           | Klra8         |
| ENSMUSG000000020641 | 3.638607945 | 1.863386611  | 0.01610484 | 0.04150478 | 310.226381 | 1327.1758  | 1665.94168 | 3656.445774 | 6262.342773 | 2099.096819 | Rsad2         |
| ENSMUSG000000046959 | 3.768423899 | 1.913961259  | 0.01610474 | 0.04150478 | 25.105025  | 13.7531171 | 7.45387776 | 124.0918125 | 18.1935056  | 33.6330103  | Slc26a1       |
| ENSMUSG000000104402 | 0.361739799 | -1.466975761 | 0.01611724 | 0.04152137 | 17.9321607 | 45.1888137 | 70.8118387 | 19.89258063 | 13.40562673 | 14.83810193 | Gm38012       |
| ENSMUSG000000000409 | 0.442200258 | -1.177228229 | 0.01623568 | 0.04178802 | 75.3150751 | 163.072674 | 136.654426 | 87.14844849 | 51.70741739 | 26.70858347 | Lck           |
| ENSMUSG000000110686 | 4.877683605 | 2.286196179  | 0.01628905 | 0.04189327 | 4.48304019 | 1.96473102 | 3.72693888 | 5.683594467 | 14.3631715  | 29.67620385 | Gm45855       |
| ENSMUSG000000083306 | 0.357115174 | -1.485538658 | 0.01630006 | 0.04189591 | 21.185929  | 38.3122548 | 84.4772812 | 12.31445468 | 20.1084401  | 18.79492911 | Gm13868       |
| ENSMUSG000000048782 | 0.339464974 | -1.558665368 | 0.01633069 | 0.04194894 | 43.0371858 | 41.2593513 | 23.6039462 | 15.15625191 | 3.830179066 | 17.80572231 | Insc          |
| ENSMUSG000000032554 | 0.491455433 | -1.0248675   | 0.01643162 | 0.04216947 | 1294.70201 | 946.017984 | 1726.81501 | 1171.767726 | 415.5744286 | 362.049687  | Trf           |
| ENSMUSG000000097770 | 3.498997318 | 1.806941559  | 0.01649757 | 0.04229992 | 1.7128643  | 2.94709652 | 6.2115648  | 10.41992319 | 22.98107439 | 23.74096308 | Gm26776       |
| ENSMUSG000000026070 | 0.451068503 | -1.148581544 | 0.01660288 | 0.04253744 | 47.520226  | 95.2894542 | 42.2386406 | 33.15430106 | 30.64143253 | 19.7841359  | Il18r1        |
| ENSMUSG000000025791 | 0.351848845 | -1.506972318 | 0.01669238 | 0.04270156 | 1356.56796 | 5047.39398 | 1480.83705 | 835.4883866 | 1106.92175  | 831.9229147 | Pgm2          |
| ENSMUSG000000049303 | 0.474295282 | -1.076142577 | 0.01681119 | 0.04297275 | 171.252135 | 63.853758  | 84.4772812 | 57.78321041 | 56.49514122 | 37.5895821  | Syt12         |
| ENSMUSG000000055027 | 0.085920207 | -3.546380115 | 0.01687534 | 0.04312357 | 124.628517 | 1819.34092 | 202.497012 | 30.31250382 | 147.461894  | 5.935240771 | Myd1          |
| ENSMUSG000000045231 | 2.75057575  | 1.459733635  | 0.01690639 | 0.04318978 | 29.5880652 | 14.7354826 | 4.96925184 | 48.31055297 | 43.08951449 | 46.49271937 | BC106179      |
| ENSMUSG000000050377 | 0.401123728 | -1.317880785 | 0.01711986 | 0.04365739 | 122.835301 | 65.818489  | 32.3001369 | 27.47070659 | 22.02352963 | 29.56827181 | Il31ra        |
| ENSMUSG000000085201 | 0.273703038 | -1.869316645 | 0.01725521 | 0.04394044 | 8.06947233 | 29.4709652 | 33.5424499 | 3.789062978 | 7.660358132 | 7.913654361 | Nr6a1os       |
| ENSMUSG000000022622 | 0.479167834 | -1.061397029 | 0.01735573 | 0.04415621 | 38.5541456 | 37.3298983 | 32.3001369 | 20.83984638 | 18.1935056  | 12.85968834 | Acr           |
| ENSMUSG000000033044 | 0.0955426   | -3.387712047 | 0.01741405 | 0.04428445 | 52.8998742 | 64.431773  | 104.354289 | 10.41992319 | 63.19795459 | 2.967620385 | Dhrs7c        |
| ENSMUSG000000054320 | 0.383327381 | -1.38335104  | 0.01751038 | 0.04502425 | 29.5880652 | 36.3475238 | 32.3001369 | 5.683594467 | 20.1084401  | 11.87048154 | Lrrc36        |
| ENSMUSG000000081264 | 0.209951353 | -2.251873012 | 0.01760782 | 0.04470947 | 7.1728643  | 11.7883861 | 45.9655795 | 2.841797233 | 6.702813365 | 3.956827181 | Gm14021       |
| ENSMUSG000000041679 | 2.067665783 | 1.048003007  | 0.01761585 | 0.0447231  | 21.2439697 | 29.4709652 | 19.8770073 | 48.31055297 | 85.22148421 | 55.39558053 | Lrrc29        |
| ENSMUSG000000078921 | 0.443122089 | -1.17422387  | 0.01762135 | 0.04473029 | 233.11809  | 74.580151  | 203.739325 | 120.3027495 | 171.4005132 | 233.4528037 | Tgtp2         |
| ENSMUSG000000045667 | 0.367788635 | -1.443051197 | 0.01771625 | 0.04491007 | 130.904773 | 815.363371 | 168.954562 | 118.4082181 | 178.1033266 | 113.7587814 | Smtln2        |
| ENSMUSG000000059108 | 0.464676621 | -1.105701035 | 0.01788283 | 0.0452708  | 43.0371858 | 120.830957 | 62.115648  | 36.94336403 | 35.42915636 | 32.64382424 | Ifitm6        |
| ENSMUSG000000099364 | 0.10716711  | -3.222065894 | 0.01789772 | 0.04528801 | 0.89660804 | 34.3827238 | 27.3308851 | 2.841797233 | 3.830179066 | 0           | 5730419F03Rik |
| ENSMUSG000000006542 | 0.114014158 | -3.132715104 | 0.01792517 | 0.04535062 | 82.4879394 | 932.264867 | 243.49334  | 32.20703531 | 106.2874691 | 4.946033976 | Prkg3         |
| ENSMUSG000000102649 | 0.418996725 | -1.254989127 | 0.01797044 | 0.04542438 | 37.6575376 | 63.853758  | 114.292792 | 17.99804914 | 34.47161159 | 37.58985821 | Gm38021       |
| ENSMUSG000000078853 | 0.498839265 | -1.003353065 | 0.01802868 | 0.04555071 | 528.998742 | 1906.77145 | 934.219345 | 368.48      |             |             |               |

|                    |             |              |            |            |            |            |            |             |             |             |               |
|--------------------|-------------|--------------|------------|------------|------------|------------|------------|-------------|-------------|-------------|---------------|
| ENSMUSG00000002204 | 0.488068628 | -1.034844073 | 0.01865745 | 0.04682916 | 143.457286 | 220.049874 | 161.500685 | 144.9316589 | 46.91969356 | 64.29844168 | Napsa         |
| ENSMUSG00000006642 | 3.310139322 | 1.726891941  | 0.01868695 | 0.04689618 | 10.7592964 | 2.94709652 | 4.96925184 | 16.10351766 | 27.76879823 | 18.79492911 | Tcf23         |
| ENSMUSG00000053004 | 0.376970921 | -1.407474855 | 0.01875993 | 0.04706528 | 16.1389447 | 31.4356962 | 39.7540147 | 13.26172042 | 11.4905372  | 7.913654361 | Hrh1          |
| ENSMUSG00000103621 | 0.380776094 | -1.392985187 | 0.01878609 | 0.04712387 | 22.4152009 | 47.1535444 | 93.1734719 | 23.68164361 | 21.06598486 | 16.81651552 | Gm38366       |
| ENSMUSG00000104852 | 0.341578003 | -1.549713023 | 0.01880385 | 0.0471543  | 16.1389447 | 28.4885997 | 63.3579609 | 11.36718893 | 15.32071626 | 9.892067951 | Gm43201       |
| ENSMUSG00000002289 | 0.476363836 | -1.069864203 | 0.01889442 | 0.04736022 | 442.027762 | 529.495009 | 1683.33406 | 345.7519967 | 415.5744286 | 502.5170519 | Angptl4       |
| ENSMUSG00000022449 | 0.32179438  | -1.635788966 | 0.01896323 | 0.04749012 | 58.2795224 | 65.818489  | 13.6654426 | 7.578125956 | 18.19335056 | 18.79492911 | Adamts20      |
| ENSMUSG00000027748 | 0.236955707 | -2.077310689 | 0.01898352 | 0.04753386 | 23.311809  | 17.6825791 | 7.45387776 | 1.894531489 | 6.702813365 | 2.967620385 | Trpc4         |
| ENSMUSG00000105201 | 0.463631075 | -1.108950829 | 0.01900039 | 0.047569   | 45.7270099 | 82.5187026 | 119.262044 | 26.52344084 | 35.42915636 | 52.42796014 | Gm43362       |
| ENSMUSG00000093424 | 0.422775329 | -1.242036905 | 0.01901435 | 0.04758975 | 26.8982411 | 52.0653719 | 60.873335  | 24.62890936 | 11.4905372  | 22.75175629 | 6330562C20Rik |
| ENSMUSG00000053846 | 0.210201381 | -2.250155945 | 0.01940338 | 0.04843923 | 13.4491206 | 40.2769858 | 37.2693888 | 10.41992319 | 8.617902898 | 0           | Lipg          |
| ENSMUSG00000030592 | 0.093204109 | -3.423462624 | 0.019505   | 0.04865159 | 616.866329 | 10454.3337 | 1214.98207 | 231.1328416 | 869.4506479 | 44.51430578 | Ryr1          |
| ENSMUSG00000066684 | 0.463282665 | -1.110035394 | 0.01950528 | 0.04865159 | 36.7609295 | 46.1711789 | 37.2693888 | 26.52344084 | 17.2358058  | 11.87048154 | Pilrb1        |
| ENSMUSG00000045284 | 0.303071134 | -1.722271644 | 0.01952063 | 0.04867541 | 18.8287688 | 14.7354826 | 23.6039462 | 7.578125956 | 7.660358132 | 1.97841359  | Dcaf12l1      |
| ENSMUSG00000071537 | 2.240116308 | 1.16357364   | 0.01956248 | 0.04876529 | 31.3812813 | 11.7883861 | 16.1500685 | 41.67969276 | 49.79232786 | 42.53589219 | Klrg2         |
| ENSMUSG00000109257 | 0.367126908 | -1.445649236 | 0.01969061 | 0.04904826 | 15.2423366 | 41.2593513 | 54.6617702 | 10.41992319 | 15.32071626 | 14.83810193 | Gm45200       |
| ENSMUSG00000089783 | 0.334997902 | -1.577776034 | 0.0198142  | 0.04929174 | 27.7948491 | 16.7002136 | 48.4502054 | 4.736328722 | 13.40562673 | 12.85968834 | Gm454         |
| ENSMUSG00000051844 | 3.07626184  | 1.621178306  | 0.01982661 | 0.04931384 | 6.27625626 | 3.92946203 | 9.93850367 | 17.0507834  | 15.32071626 | 28.68699706 | B230319C09Rik |
| ENSMUSG00000030000 | 2.111842171 | 1.078502019  | 0.01985305 | 0.04935765 | 28.6914572 | 30.4533307 | 33.5424499 | 46.41602148 | 103.4148348 | 45.50351258 | Add2          |
| ENSMUSG00000002500 | 0.089467002 | -3.482500512 | 0.01998027 | 0.04960049 | 71.728643  | 1422.46525 | 176.40844  | 16.10351766 | 125.4383644 | 7.913654361 | Rpl3l         |
| ENSMUSG00000044667 | 0.409856253 | -1.286810087 | 0.0199926  | 0.04962376 | 25.105025  | 43.2240823 | 52.1771443 | 10.41992319 | 24.89616393 | 13.84889513 | Plppr4        |
