# Supplementary material
Source: PubMed Central journal article supplement (PMC8639767)
Supplement: NIHMS1752098-supplement-Supplemental_table_III.pdf [file NIHMS1752098-supplement-Supplemental_table_III.pdf]

**Supplemental table III. Differentially expressed genes between Injured and shDNMT3A+Injured with p-value adjusted significance** Differentially expressed genes with greater than 2-fold difference were analyzed

| ID                  | Fold Change  | log2FoldChange | pvalue    | padj      | Injured-1  | Injured-2  | Injured-3  | shDNMT3A+Injured-1 | shDNMT3A+Injured-2 | shDNMT3A+Injured-3 | Gene.name     |
|---------------------|--------------|----------------|-----------|-----------|------------|------------|------------|--------------------|--------------------|--------------------|---------------|
| ENSMUSG00000039236  | 27.76525943  | 4.795208971    | 0         | 0         | 237.144895 | 273.93107  | 289.904489 | 7133.867032        | 7853.029319        | 7182.239254        | Isg20         |
| ENSMUSG00000044468  | 67.37930754  | 6.074233697    | 0         | 0         | 391.065355 | 342.413837 | 366.716789 | 23605.24009        | 21712.97314        | 28836.15462        | Fam46c        |
| ENSMUSG00000086843  | 16.16850389  | 4.015114284    | 3.87E-287 | 2.19E-287 | 370.482968 | 379.590196 | 354.327709 | 6276.436069        | 6100.799215        | 5494.642739        | E030013119Rik |
| ENSMUSG000000605037 | 1225.719342  | 10.25941296    | 1.42E-275 | 6.03E-271 | 16.1079551 | 15.653204  | 13.6279888 | 21259.73148        | 20671.70635        | 14082.70196        | Rn7sk         |
| ENSMUSG00000025270  | 591.1682697  | 9.207425026    | 1.22E-259 | 4.15E-256 | 98.4375035 | 66.5261169 | 163.535866 | 57214.87696        | 65726.97912        | 69836.6846         | Alas2         |
| ENSMUSG00000042793  | 149.616719   | 7.225127589    | 1.82E-256 | 5.14E-253 | 46.5340926 | 26.4147817 | 55.7508633 | 5882.929106        | 6887.723792        | 6264.423605        | Lgr6          |
| ENSMUSG00000025889  | 147.0790798  | 7.200448245    | 5.36E-232 | 1.30E-228 | 34.9005694 | 48.9162624 | 50.795231  | 5433.502731        | 6341.485474        | 7858.094604        | SncA          |
| ENSMUSG00000027562  | 95.10791538  | 6.57149351     | 3.19E-231 | 6.75E-228 | 45.6392062 | 77.2876946 | 84.2457489 | 6038.260802        | 6991.850471        | 6453.295569        | Car2          |
| ENSMUSG00000029922  | 10.78214537  | 3.430572361    | 7.70E-225 | 1.45E-221 | 1130.24152 | 1295.30263 | 1297.13675 | 12785.86968        | 13095.21018        | 14233.79953        | Mkrrn1        |
| ENSMUSG00000006219  | 8.073975687  | 3.013279242    | 7.12E-203 | 1.21E-199 | 4080.68196 | 3464.24971 | 3786.10307 | 29649.71416        | 30534.72198        | 31308.84594        | Fblim1        |
| ENSMUSG00000083012  | 20.22141652  | 4.337812157    | 1.28E-200 | 1.97E-197 | 476.974449 | 658.412892 | 564.942081 | 12101.37467        | 11418.08784        | 10847.37627        | Fam220a       |
| ENSMUSG00000040998  | 16.2556793   | 4.02287194     | 1.28E-190 | 1.80E-187 | 1507.88358 | 1265.95287 | 1494.12314 | 22233.14344        | 26250.16517        | 20884.1345         | Npnt          |
| ENSMUSG00000022051  | 12.4575895   | 3.638953034    | 4.62E-189 | 6.02E-186 | 2508.36657 | 2596.47521 | 3207.533   | 34722.84736        | 34330.22479        | 34445.14146        | Bnip3l        |
| ENSMUSG00000023572  | 7.643059465  | 2.934150255    | 1.98E-173 | 2.40E-170 | 758.863663 | 768.963645 | 743.344844 | 5297.846383        | 5969.36062         | 6094.949303        | Ccndbp1       |
| ENSMUSG00000038677  | 7.631734457  | 2.932010974    | 7.30E-169 | 8.25E-166 | 1421.97448 | 1185.7302  | 1261.20842 | 9774.505867        | 10078.95047        | 9685.558466        | Scube6        |
| ENSMUSG00000092837  | 328.7950436  | 8.361044741    | 3.68E-163 | 3.89E-160 | 12.5284095 | 7.82660199 | 12.3890807 | 4222.951046        | 3397.773038        | 3097.500199        | Rpph1         |
| ENSMUSG00000014956  | 4.551646005  | 2.186388359    | 2.19E-160 | 2.18E-157 | 5923.25305 | 6504.88458 | 6319.67008 | 29031.49401        | 28153.46431        | 28141.92254        | Ppp1cb        |
| ENSMUSG00000068748  | 15.0505086   | 3.911740335    | 3.45E-160 | 3.25E-157 | 166.44887  | 179.033521 | 135.04098  | 2333.082076        | 2598.046           | 2334.865839        | Ptprz1        |
| ENSMUSG00000031586  | 4.371147517  | 2.128012067    | 8.54E-150 | 7.61E-147 | 2485.99441 | 2388.09193 | 2412.15402 | 10144.1953         | 10848.8051         | 10858.6065         | Rbpm5         |
| ENSMUSG00000054889  | 752.7577411  | 9.556041829    | 7.37E-149 | 6.24E-146 | 5.36931837 | 1.9566505  | 11.1501727 | 4316.150064        | 4504.759129        | 4245.024992        | Dsp           |
| ENSMUSG00000026255  | 6.461962425  | 2.691972362    | 1.92E-148 | 1.55E-145 | 748.125027 | 808.096655 | 760.689557 | 4761.434259        | 5365.08448         | 4844.310627        | Efhf1         |
| ENSMUSG00000017969  | 5.565248386  | 2.476446079    | 4.66E-147 | 3.58E-144 | 2300.75292 | 2195.36186 | 2476.57724 | 13589.45232        | 12805.02107        | 12396.12637        | Ptgis         |
| ENSMUSG00000022021  | 19.64698876  | 4.296236306    | 6.32E-140 | 4.65E-137 | 78.7500028 | 92.9408986 | 110.262818 | 2029.667496        | 1730.89267         | 1736.601133        | Diaph3        |
| ENSMUSG00000029860  | 4.260341381  | 2.090969038    | 1.14E-139 | 7.79E-137 | 3729.8865  | 3652.08815 | 3851.7652  | 16102.71917        | 15185.42524        | 16566.62351        | Zyx           |
| ENSMUSG00000050503  | 3.72814282   | 2.51420163     | 1.15E-139 | 7.79E-137 | 630.000022 | 674.066096 | 586.003518 | 3648.22377         | 3566.765517        | 3595.71381         | Fbxl22        |
| ENSMUSG00000023336  | 4.873727803  | 2.285025679    | 3.69E-135 | 2.40E-132 | 984.375035 | 1100.6159  | 1061.74422 | 5136.301419        | 5186.703529        | 5006.638423        | Wfdc1         |
| ENSMUSG00000049313  | 5.087861346  | 2.347059355    | 6.21E-134 | 3.89E-131 | 1580.36937 | 1478.24945 | 1424.74428 | 7482.845576        | 8011.779831        | 7327.211248        | Sorl1         |
| ENSMUSG00000047648  | 6.918841873  | 2.790530569    | 8.56E-134 | 5.18E-131 | 622.840931 | 590.90845  | 662.815819 | 4180.493716        | 4089.95496         | 4703.422352        | Fbxo30        |
| ENSMUSG00000027335  | 17.38216641  | 4.119359977    | 4.58E-133 | 2.68E-130 | 73.3806844 | 63.5911412 | 75.573924  | 1129.779203        | 1332.309938        | 1223.073579        | Adra14        |
| ENSMUSG00000021508  | 0.571355089  | -4.277861122   | 4.89E-132 | 2.76E-129 | 1723.5512  | 1819.68496 | 1777.83308 | 105.6255534        | 100.7126899        | 67.38134908        | Xccl1d        |
| ENSMUSG00000063430  | 7.860166719  | 2.974559913    | 4.44E-131 | 2.42E-128 | 164.659097 | 175.12022  | 178.402762 | 1352.421301        | 1382.665743        | 1330.27118         | Wscd2         |
| ENSMUSG00000035783  | 4.273096839  | 2.095282012    | 2.96E-128 | 1.57E-125 | 74266.622  | 74572.8421 | 66495.913  | 303614.4399        | 310347.0074        | 306204.3316        | Acta2         |
| ENSMUSG00000051839  | 1580.822273  | 10.62645946    | 1.19E-127 | 6.08E-125 | 3.57954558 | 1.9566505  | 7.43344844 | 5735.881767        | 6350.87945         | 7289.436855        | Gypa          |
| ENSMUSG00000073490  | 0.089341861  | -3.484519887   | 2.09E-127 | 1.04E-124 | 1202.72732 | 1269.86617 | 1377.66578 | 123.2298123        | 113.5155105        | 107.1976008        | Ifi207        |
| ENSMUSG00000015143  | 3.422046181  | 1.774859229    | 1.03E-126 | 4.96E-124 | 9703.25319 | 9452.57855 | 9070.046   | 32620.69174        | 32302.31504        | 31677.4015         | Actn1         |
| ENSMUSG00000041696  | 3.861790654  | 1.949269959    | 7.68E-126 | 3.61E-123 | 2455.56827 | 2293.19438 | 2465.42706 | 9475.233465        | 9098.281985        | 9283.31223         | Ras12         |
| ENSMUSG00000026712  | 0.120769965  | -3.049666386   | 5.27E-121 | 2.41E-118 | 2740.14214 | 2394.94021 | 2772.67627 | 336.5520083        | 332.0107472        | 285.8602688        | Mrc1          |
| ENSMUSG00000020155  | 5.5951355686 | 2.573218344    | 4.57E-121 | 2.48E-118 | 842.982984 | 808.096655 | 755.733924 | 4760.398715        | 5137.200682        | 4436.959744        | Kcnmb1        |
| ENSMUSG00000025150  | 5.308868003  | 2.408404271    | 7.16E-119 | 3.11E-116 | 1041.64776 | 1169.09867 | 1118.73399 | 5483.208874        | 6120.429654        | 6066.363276        | Cbr2          |
| ENSMUSG00000029372  | 133.4137678  | 7.059763745    | 5.56E-117 | 2.35E-114 | 60.8522749 | 61.6344907 | 116.457359 | 10494.20939        | 7146.333495        | 13989.79737        | Pbbp          |
| ENSMUSG00000031028  | 12.94826108  | 3.694686455    | 4.30E-113 | 1.78E-110 | 195.980121 | 132.073909 | 178.402762 | 2129.079782        | 2181.539285        | 2247.065899        | Tub           |
| ENSMUSG00000091694  | 502.3128551  | 8.972442386    | 1.25E-111 | 5.03E-109 | 4.47443198 | 4.89162624 | 11.1501727 | 2718.304683        | 2851.53472         | 4250.12964         | Atm11b        |
| ENSMUSG000000065326 | 6.682736341  | 2.740438956    | 1.56E-111 | 6.16E-109 | 800.923324 | 791.465126 | 961.392664 | 5315.450642        | 5901.934327        | 5825.423907        | Tmem110       |
| ENSMUSG00000030098  | 5.42827157   | 2.440492899    | 1.67E-111 | 6.42E-109 | 769.6023   | 838.424738 | 924.225422 | 4655.808706        | 4431.358355        | 4640.124721        | Grip2         |
| ENSMUSG00000057604  | 7.516269083  | 2.910016716    | 2.77E-109 | 1.04E-106 | 1118.60799 | 997.891754 | 847.413122 | 7697.203317        | 7106.219119        | 7502.811127        | Lmcd1         |
| ENSMUSG00000053963  | 6.979705578  | 3.83166388     | 4.06E-109 | 1.49E-106 | 770.497186 | 644.716339 | 624.096669 | 4642.346626        | 5074.041876        | 4537.010838        | Stum          |
| ENSMUSG00000021319  | 0.121421171  | -3.041908101   | 1.09E-108 | 3.91E-106 | 14386.1937 | 11103.9916 | 12467.1319 | 1674.475685        | 1424.48714         | 1510.975707        | Sfrp4         |
| ENSMUSG000000389601 | 5.3852139661 | 2.429005007    | 5.73E-107 | 2.02E-104 | 1660.01426 | 1444.98639 | 1715.88768 | 8994.740752        | 8799.557905        | 8158.247886        | Rcan2         |
| ENSMUSG00000001349  | 4.27077055   | 2.09449639     | 8.32E-107 | 2.88E-104 | 6851.25024 | 7307.11128 | 6266.39703 | 28730.15052        | 29800.71424        | 28711.60122        | Cnn1          |
| ENSMUSG00000024395  | 3.742843605  | 1.904134766    | 2.92E-104 | 9.90E-102 | 1784.40347 | 1676.84948 | 1701.02078 | 6637.841149        | 6551.445827        | 6135.786484        | Lims2         |
| ENSMUSG00000030878  | 5.91113047   | 2.563434064    | 4.30E-104 | 1.43E-101 | 680.113661 | 635.911412 | 789.480442 | 4097.650145        | 4043.017051        | 4284.841244        | Cdr2          |
| ENSMUSG00000080808  | 453.9929939  | 8.826526223    | 1.07E-103 | 3.50E-101 | 5.36931837 | 3.91330099 | 8.67235651 | 3307.529583        | 2470.023194        | 2120.470637        | Rmrp          |
| ENSMUSG00000032085  | 3.059961747  | 1.613089228    | 2.86E-103 | 9.13E-101 | 14669.8727 | 15107.2985 | 14767.7842 | 44476.64233        | 47333.25275        | 44454.33459        | Tagln         |
| ENSMUSG00000024867  | 16.34384735  | 4.03067573     | 5.43E-102 | 1.70E-99  | 68.0113661 | 74.3527189 | 78.0512086 | 1362.776748        | 1208.552279        | 1019.908602        | Pip5k1b       |
| ENSMUSG00000029304  | 0.013187421  | -6.244693739   | 2.09E-101 | 6.44E-99  | 3416.67626 | 7460.70835 | 6988.68044 | 69.38149095        | 79.37525599        | 86.77901018        | Spp1          |
| ENSMUSG00000027931  | 3.789475548  | 1.921998198    | 5.09E-100 | 1.54E-97  | 2009.01996 | 2200.25348 | 2011.98671 | 7585.364495        | 8138.950939        | 7852.989956        | Npr1          |
| ENSMUSG00000044338  | 0.09713047   | -3.363932252   | 9.28E-99  | 2.76E-96  | 1200.04266 | 1098.65925 | 1312.00365 | 125.3009016        | 123.7571189        | 101.0702036        | Alnpr         |
| ENSMUSG00000046805  | 0.06750148   | -3.888937059   | 2.10E-98  | 6.13E-96  | 3882.01718 | 5702.65787 | 5135.27396 | 321.0188387        | 294.4565933        | 378.7648562        | Mpeg1         |
| ENSMUSG00000026656  | 0.078319092  | -3.674492157   | 2.96E-96  | 8.48E-94  | 1466.7188  | 2037.85149 | 1807.56688 | 149.1184283        | 138.265743         | 129.637121         | Fcgr2b        |
| ENSMUSG00000034449  | 8.033492498  | 3.006027325    | 4.84E-96  | 1.37E-93  | 170.028415 | 209.361603 | 167.25259  | 1399.02081         | 1557.632704        | 1440.531569        | Dhrs11        |
| ENSMUSG00000024621  | 0.095862499  | -3.382886643   | 2.54E-95  | 7.05E-93  | 3184.00579 | 3722.52757 | 2849.48857 | 358.2984458        | 273.972654         | 304.2370004        | Csf1r         |
| ENSMUSG00000030409  | 4.141974021  | 2.050318505    | 4.92E-95  | 1.34E-92  | 4939.7729  | 5675.26477 | 5145.18523 | 21805.46351        | 20717.79521        | 22756.51926        | Dmpk          |
| ENSMUSG00000022840  | 5.341533616  | 2.417254016    | 8.40E-95  | 2.26E-92  | 4053.83537 | 3318.47924 | 3771.23617 | 21300.11772        | 18997.14451        | 19229.20773        | Acdy5         |
| ENSMUSG00000037852  | 3.414248372  | 1.771568012    | 3.16E-94  | 8.37E-92  | 11850.9805 | 11890.5651 | 12033.5141 | 39858.11323        | 43544.58242        | 38738.15014        | Pcy           |
| ENSMUSG00000001507  | 3.07665865   | 1.621363551    | 3.01E-93  | 7.71E-91  | 1590.21312 | 1642.60809 | 1639.07538 | 4963.365464        | 5101.353792        | 4920.880342        | Itha3         |
| ENSMUSG00000015932  | 3.595685665  | 1.846266906    | 2.98E-93  | 7.71E-91  | 15518.225  | 14871.5221 | 15549.5352 | 52783.78144        | 59270.2715         | 53125.0891         | Ostn          |
| ENSMUSG0000         |              |                |           |           |            |            |            |                    |                    |                    |               |

|                    |              |              |          |          |            |            |            |             |               |             |          |
|--------------------|--------------|--------------|----------|----------|------------|------------|------------|-------------|---------------|-------------|----------|
| ENSMUSG00000073557 | 3.382979922  | 1.758294615  | 3.70E-78 | 6.96E-76 | 7568.94913 | 6892.30138 | 6716.12066 | 24992.86991 | 23693.08705   | 22966.83074 | Ppp1r12b |
| ENSMUSG00000010311 | 13.7000462   | 3.776108853  | 1.48E-77 | 2.76E-75 | 154.815346 | 123.268981 | 188.314027 | 1903.33105  | 2534.887195   | 1927.514956 | Optc     |
| ENSMUSG00000032289 | 10.77709867  | 3.429896934  | 2.24E-77 | 4.12E-75 | 1013.0114  | 775.811922 | 634.320933 | 8413.800208 | 9552.342587   | 8180.708336 | Thsd4    |
| ENSMUSG00000029108 | 5.22959782   | 2.386700001  | 6.19E-77 | 1.13E-74 | 2244.37508 | 1799.14013 | 1863.31774 | 10356.48195 | 10987.07167   | 9556.921345 | Pcdh7    |
| ENSMUSG00000031292 | 9.161602043  | 3.195598987  | 8.16E-77 | 1.47E-74 | 185.241484 | 156.53204  | 189.552935 | 1853.624907 | 1637.861457   | 1371.108361 | Cdkl5    |
| ENSMUSG00000027883 | 5.78969479   | 2.533488465  | 6.57E-76 | 1.17E-73 | 411.647742 | 364.915318 | 382.822594 | 1955.108282 | 2346.264276   | 2413.477413 | Gpsm2    |
| ENSMUSG00000030246 | 4.034509353  | 2.012393234  | 9.37E-76 | 1.65E-73 | 462.656266 | 495.032576 | 519.102482 | 2087.657996 | 1937.439034   | 1925.473096 | Ldhb     |
| ENSMUSG00000037419 | 3.237749667  | 1.694991445  | 1.26E-75 | 2.20E-73 | 1837.20177 | 1767.83372 | 1847.21194 | 5538.09274  | 6207.486386   | 5904.035481 | Endod1   |
| ENSMUSG00000022246 | 0.20064443   | -2.317289049 | 6.00E-75 | 1.04E-72 | 1078.33811 | 987.130176 | 1036.96606 | 202.2788772 | 202.2788772   | 201.1231177 | Rai14    |
| ENSMUSG00000073400 | 311.487317   | 8.283029611  | 1.22E-74 | 2.09E-72 | 1.78977279 | 4.89162624 | 6.19454036 | 1073.859793 | 1426.194109   | 1321.082814 | Trim10   |
| ENSMUSG00000021779 | 5.655866284  | 2.499748012  | 5.79E-74 | 9.81E-72 | 587.045475 | 448.072964 | 504.235586 | 2729.695674 | 3029.062173   | 2953.549135 | Thrb     |
| ENSMUSG00000026421 | 2.781066393  | 1.475638187  | 9.69E-74 | 1.62E-71 | 16418.4807 | 17787.9097 | 18147.5254 | 48147.64808 | 48965.99773   | 48476.79695 | Csrp1    |
| ENSMUSG00000029651 | 5.043897565  | 2.334538977  | 1.65E-73 | 2.74E-71 | 455.497175 | 438.289711 | 481.93524  | 2521.551201 | 2354.799249   | 2057.173006 | Mtus2    |
| ENSMUSG00000025348 | 2.981899753  | 1.576231757  | 1.91E-72 | 3.13E-70 | 1989.33246 | 1890.12438 | 1828.62832 | 5893.284552 | 5577.605326   | 5557.94037  | Itga7    |
| ENSMUSG00000005611 | 4.93657345   | 2.303509993  | 3.33E-72 | 5.42E-70 | 2185.31258 | 1990.89188 | 1722.08222 | 9459.700296 | 10491.1897    | 9182.240207 | Mrv1     |
| ENSMUSG00000038642 | 0.043301926  | -4.529424999 | 3.75E-72 | 6.05E-70 | 4117.37231 | 8551.541   | 5835.25702 | 280.6325977 | 254.3422168   | 266.4626077 | Ctss     |
| ENSMUSG00000078652 | 6.196657729  | 2.631490284  | 4.43E-72 | 7.08E-70 | 897.571055 | 1010.60998 | 1056.78859 | 5305.095196 | 5994.112043   | 7063.811429 | Psm3e    |
| ENSMUSG00000025969 | 0.21144798   | -2.241625316 | 1.42E-71 | 2.25E-69 | 2521.78986 | 2462.44465 | 2252.33488 | 571.6206418 | 483.0795125   | 476.7740912 | Nrp2     |
| ENSMUSG00000020672 | 7.70648735   | 2.946610365  | 5.04E-71 | 7.90E-69 | 81.434662  | 79.2443561 | 86.7235651 | 588.1893561 | 662.3139606   | 651.3530411 | Smtg2    |
| ENSMUSG00000048096 | 4.026285387  | 2.009449436  | 5.12E-71 | 7.96E-69 | 5873.13941 | 5034.46173 | 6174.71783 | 23644.59079 | 21972.43634   | 23153.66085 | Lmod1    |
| ENSMUSG00000062382 | 15.75469739  | 3.977710138  | 1.02E-70 | 1.57E-68 | 34.005683  | 54.7862139 | 54.5119552 | 677.2461952 | 729.740253    | 830.0157091 | Ftl1-ps1 |
| ENSMUSG00000056091 | 6.950345389  | 2.797084673  | 3.25E-70 | 4.95E-68 | 234.460236 | 326.760633 | 249.020523 | 1833.949559 | 1838.433339   | 1962.22656  | St3gal5  |
| ENSMUSG00000041073 | 5.320401132  | 2.411535022  | 3.16E-69 | 4.77E-67 | 230.88069  | 189.759508 | 203.180924 | 1124.60148  | 1054.069254   | 1146.503864 | Nacad    |
| ENSMUSG00000034248 | 16.61356097  | 4.05428943   | 8.75E-69 | 1.31E-66 | 844.772757 | 946.040515 | 758.21147  | 11812.45772 | 11005.84861   | 19542.63309 | Slc25a37 |
| ENSMUSG00000020802 | 8.614297736  | 3.106733188  | 1.96E-68 | 2.91E-66 | 601.363658 | 597.756727 | 604.587139 | 4904.33942  | 4182.99062    | 6451.25371  | Ube2o    |
| ENSMUSG00000026991 | 4.431232262  | 2.147707947  | 3.10E-68 | 4.56E-66 | 1938.32393 | 2014.37169 | 2407.19839 | 9099.330761 | 9991.893734   | 9073.000747 | Pkp4     |
| ENSMUSG00000031024 | 3.899540616  | 1.963304178  | 3.10E-67 | 4.53E-65 | 1760.24154 | 1450.85634 | 1713.40986 | 6173.91715  | 6564.248288   | 6462.483935 | St5      |
| ENSMUSG00000045915 | 5.020958769  | 5.700705696  | 4.19E-67 | 6.07E-65 | 7.15909116 | 11.739903  | 12.3890807 | 475.3149902 | 617.0785999   | 503.318259  | Ccdc42   |
| ENSMUSG00000037242 | 2.271224025  | 1.183470015  | 2.09E-66 | 3.00E-64 | 8994.03439 | 8317.72126 | 8165.64311 | 18593.20403 | 19145.65305   | 18765.70572 | Clic4    |
| ENSMUSG00000038319 | 3.809803167  | 1.929716463  | 4.43E-66 | 6.31E-64 | 892.429013 | 847.229665 | 916.791974 | 3342.738101 | 3433.619927   | 3728.434649 | Kcnh2    |
| ENSMUSG00000078794 | 3.53994199   | 1.823725719  | 4.48E-66 | 6.32E-64 | 1285.05686 | 1146.59719 | 1206.34152 | 4148.391832 | 4240.328054   | 4667.689818 | Dact3    |
| ENSMUSG00000030376 | 4.601189148  | 2.202006765  | 3.01E-65 | 4.21E-63 | 192.400575 | 204.469977 | 240.746580 | 889.5328466 | 966.1590251   | 891.271481  | Slc8a2   |
| ENSMUSG00000030054 | 87.58182668  | 6.452559635  | 3.21E-65 | 4.46E-63 | 5.36931837 | 11.739903  | 17.344713  | 938.2034448 | 710.1098135   | 1265.952619 | Gp9      |
| ENSMUSG00000081534 | 2.941213019  | 1.556411276  | 4.29E-65 | 5.90E-63 | 2189.78701 | 2249.16975 | 2424.5431  | 6437.981033 | 6861.265373   | 6878.002254 | Slc48a1  |
| ENSMUSG00000074622 | 0.153058785  | -2.70784224  | 6.14E-65 | 8.39E-63 | 1339.64493 | 1523.25241 | 1559.78526 | 191.5757586 | 222.7628141   | 262.3788896 | Ma1b     |
| ENSMUSG00000026357 | 26.98662063  | 4.754172423  | 1.27E-64 | 1.73E-62 | 74.2755708 | 107.615777 | 109.02391  | 2448.027531 | 1791.490984   | 3589.588233 | Rgs18    |
| ENSMUSG00000039151 | 5.419752316  | 2.438226922  | 1.47E-64 | 1.98E-62 | 3288.70575 | 2805.83681 | 2441.88781 | 14128.97108 | 16610.76585   | 15542.63119 | Itga9    |
| ENSMUSG00000042254 | 0.047996069  | -4.38093994  | 2.69E-64 | 3.58E-62 | 1669.85801 | 2131.77072 | 3201.33846 | 129.4430801 | 106.6871715   | 100.0510941 | Cilp     |
| ENSMUSG00000073489 | 0.063874615  | -3.968613502 | 5.16E-64 | 6.83E-62 | 813.451733 | 1338.34894 | 1215.36882 | 68.34594631 | 75.96126611   | 70.44413768 | Ifi204   |
| ENSMUSG00000031819 | 3.55873285   | 1.831363406  | 5.53E-64 | 7.26E-62 | 814.34662  | 887.341001 | 945.286859 | 2976.155298 | 3274.015919   | 3158.755971 | Emc8     |
| ENSMUSG00000030159 | 4.07246877   | 4.091077672  | 6.45E-64 | 8.40E-62 | 49.2187517 | 30.3280827 | 50.795231  | 782.8717486 | 615.3716052   | 814.7017662 | Clec1b   |
| ENSMUSG00000002980 | 2.994418792  | 1.582131462  | 9.12E-64 | 1.18E-61 | 7706.76164 | 8620.02377 | 8292.01173 | 25120.2419  | 23152.82321   | 25436.45928 | Bcam     |
| ENSMUSG00000037736 | 5.841878297  | 2.546432303  | 1.43E-63 | 1.84E-61 | 808.082415 | 1072.24447 | 894.491628 | 4959.223286 | 6051.296367   | 5197.552245 | Limch1   |
| ENSMUSG00000026457 | 5.86037613   | 2.550993263  | 2.10E-63 | 2.68E-61 | 2277.48588 | 3201.08021 | 2850.72748 | 16147.24759 | 17472.7982    | 15184.28492 | Adipor1  |
| ENSMUSG00000036098 | 12.19474507  | 3.608187769  | 2.53E-63 | 3.20E-61 | 45.6392062 | 48.9162624 | 62.4316528 | 480.4927134 | 633.29505     | 570.6996081 | Myrf     |
| ENSMUSG00000016024 | 0.139644742  | -2.840166845 | 4.98E-63 | 6.24E-61 | 2983.55124 | 2818.55504 | 2378.7035  | 457.7107313 | 332.8639751   | 353.2416179 | Lbp      |
| ENSMUSG00000024679 | 0.0490135    | -4.350624026 | 1.72E-62 | 2.14E-60 | 412.542628 | 575.255246 | 542.641736 | 26.92416067 | 26.45841853   | 21.43952016 | Ms4a6d   |
| ENSMUSG00000021822 | 0.1762123245 | -2.505342762 | 5.20E-62 | 6.43E-60 | 1153.50856 | 1354.00214 | 1427.2221  | 244.3885353 | 208.2533588   | 240.9393694 | Plau     |
| ENSMUSG00000029859 | 6.255935099  | 2.645225546  | 6.58E-62 | 8.07E-60 | 121.70455  | 98.8108501 | 130.085348 | 743.5210523 | 726.326635    | 716.6925311 | Epha1    |
| ENSMUSG00000026768 | 11.18674679  | 3.483718643  | 7.38E-62 | 8.99E-60 | 6334.90079 | 4466.05476 | 3527.17128 | 52721.64876 | 57060.5668    | 50536.01181 | Itga8    |
| ENSMUSG00000027326 | 14.41786346  | 3.849785486  | 8.16E-62 | 9.87E-60 | 56.3778429 | 58.6995149 | 45.8395987 | 955.8077037 | 730.5937504   | 646.2483935 | Knl1     |
| ENSMUSG00000039542 | 7.809012418  | 2.965140107  | 2.08E-61 | 2.50E-59 | 770.497186 | 790.486801 | 1143.51215 | 6394.488158 | 7383.605765   | 7313.939164 | Ncam1    |
| ENSMUSG00000059498 | 0.88617024   | -3.202677854 | 2.50E-61 | 2.98E-59 | 1035.38356 | 1434.22481 | 1309.52853 | 148.0828837 | 148.5085427   | 113.323178  | Fcg2r    |
| ENSMUSG00000032911 | 3.058517328  | 1.61283245   | 6.51E-61 | 7.71E-59 | 4243.55129 | 3989.61036 | 4645.90527 | 13546.99499 | 12733.32799   | 13101.58868 | Cspg4    |
| ENSMUSG00000079557 | 6.184552938  | 2.628669311  | 7.71E-61 | 9.07E-59 | 1369.17618 | 1715.00416 | 2047.91504 | 10654.71881 | 10399.01108   | 10663.60896 | 2-Mar    |
| ENSMUSG00000004552 | 69.31665909  | 6.115130216  | 1.07E-60 | 1.25E-58 | 10.7386367 | 8.80492724 | 3.71672422 | 528.1277669 | 675.1164212   | 472.6903731 |          |
| ENSMUSG00000049565 | 17.56478     | 4.134613602  | 7.22E-60 | 8.38E-58 | 23.2670463 | 32.2847332 | 29.7337937 | 422.5022135 | 572.6967366   | 494.1298933 | Aknad1   |
| ENSMUSG00000023992 | 0.039639071  | -4.656933035 | 9.24E-60 | 1.06E-57 | 588.835248 | 897.124253 | 1073.65548 | 31.06633923 | 31.57940276   | 38.7953222  | Trim2    |
| ENSMUSG00000050295 | 2.575134585  | 1.364647834  | 1.07E-59 | 1.23E-57 | 1286.84664 | 1261.06125 | 1232.71353 | 3322.027208 | 3199.761648   | 3217.969883 | Foxc1    |
| ENSMUSG00000038289 | 38.00943428  | 5.248285648  | 1.81E-59 | 2.05E-57 | 8.05397756 | 7.82660197 | 16.1058409 | 399.7202314 | 372.1248542   | 399.1834468 | Slc22a1  |
| ENSMUSG00000097971 | 34.81026776  | 5.121441006  | 2.65E-59 | 2.99E-57 | 738.281276 | 1374.54697 | 2000.83654 | 52572.53034 | 53269.33148   | 37279.24184 | Gm26917  |
| ENSMUSG00000037166 | 3.557092731  | 1.830698585  | 3.43E-59 | 3.85E-57 | 1907.00291 | 2320.58749 | 2194.1062  | 7592.613308 | 7316.179473   | 7928.538742 | Ppp1r14a |
| ENSMUSG00000027254 | 4.049584821  | 2.017774005  | 4.17E-59 | 4.64E-57 | 1230.46879 | 1053.65629 | 1098.91146 | 4103.863412 | 4669.484812   | 4931.089632 | Myk      |
| ENSMUSG00000055322 | 3.390285482  | 1.761406762  | 6.98E-59 | 7.73E-57 | 19042.2876 | 15747.1232 | 18723.6177 | 61286.63849 | 60952.51482   | 59182.26401 | Tns1     |
| ENSMUSG00000026676 | 4.669611836  | 2.22330263   | 2.29E-58 | 2.52E-56 | 1904.98586 | 1476.2928  | 1386.33813 | 7118.333862 | 7846.201342   | 6844.311579 | Ccdc3    |
| ENSMUSG00000054555 | 0.032369832  | -4.949206318 | 8.22E-58 | 8.99E-56 | 967.371293 | 511.664105 | 838.740765 | 26.92416067 | 25.60492116   | 22.46044969 | Adam12   |
| ENSMUSG00000036908 | 0.14382693   | -2.797594261 | 1.63E-57 | 1.77E-55 | 2069.87223 | 3085.63783 | 2787.54316 | 387.2936957 | 377.2458384   | 377.7439267 | Unc93b1  |
| ENSMUSG00000042109 | 63.1193591   | 2.676085388  | 2.42E-57 | 2.61E-55 | 144.971596 | 102.724151 | 128.84644  | 793.227195  | 800.5805349</ |             |          |

|                     |             |              |          |          |            |            |            |             |             |             |               |
|---------------------|-------------|--------------|----------|----------|------------|------------|------------|-------------|-------------|-------------|---------------|
| ENSMUSG00000026532  | 102.1664362 | 6.674777509  | 2.75E-54 | 2.54E-52 | 3.57954558 | 7.82660199 | 4.95563229 | 565.407374  | 436.9906544 | 664.625125  | Spta1         |
| ENSMUSG00000038244  | 3.108615456 | 1.636272162  | 2.92E-54 | 2.69E-52 | 2871.69044 | 2602.34516 | 2376.22568 | 8067.928298 | 8247.345105 | 8100.054903 | Mical2        |
| ENSMUSG00000027858  | 3.754278847 | 1.90853581   | 3.36E-54 | 3.08E-52 | 2225.58247 | 1872.51453 | 1744.38257 | 7204.284068 | 7517.604852 | 7225.118295 | Tspan2        |
| ENSMUSG00000021922  | 13.37123363 | 3.74106067   | 3.96E-54 | 3.61E-52 | 519.28996  | 318.934031 | 160.170695 | 4535.685528 | 5039.901981 | 5153.652275 | Itih4         |
| ENSMUSG00000044676  | 6.809419852 | 2.767531889  | 5.03E-54 | 4.55E-52 | 66.8039804 | 104.680802 | 109.02391  | 609.9357936 | 678.5304107 | 749.3622761 | Zfp612        |
| ENSMUSG00000070942  | 0.083181101 | -3.587600417 | 1.66E-53 | 1.50E-51 | 631.788795 | 483.292673 | 460.873803 | 41.42178564 | 49.50284757 | 39.81625173 | Il1rl2        |
| ENSMUSG00000079227  | 0.035937004 | -4.798386033 | 1.81E-53 | 1.62E-51 | 553.934679 | 966.585346 | 810.24588  | 18.63980354 | 27.3119159  | 37.77439267 | Ccr5          |
| ENSMUSG00000031930  | 4.25560995  | 2.089365926  | 2.11E-53 | 1.88E-51 | 3053.35238 | 2811.70676 | 3782.38635 | 13636.05183 | 13509.1564  | 13894.85092 | Wwp2          |
| ENSMUSG00000019851  | 3.264107194 | 1.706688437  | 2.29E-53 | 2.03E-51 | 664.005705 | 752.332116 | 675.2049   | 2245.060782 | 2408.556584 | 2173.558973 | Perp          |
| ENSMUSG00000021136  | 4.49013109  | 2.166757565  | 5.01E-53 | 4.41E-51 | 1447.92619 | 1154.42379 | 1591.99687 | 6289.89815  | 6343.192468 | 6189.89575  | Smoc1         |
| ENSMUSG00000026620  | 4.081813767 | 2.029210361  | 5.93E-53 | 5.20E-51 | 805.397756 | 677.979397 | 748.300476 | 2993.759557 | 3365.340138 | 2750.384158 | Mark1         |
| ENSMUSG00000036412  | 0.088020539 | -3.506015987 | 2.60E-52 | 2.27E-50 | 409.857969 | 432.41976  | 541.402828 | 46.59950885 | 37.55388437 | 37.77439267 | Ars1          |
| ENSMUSG00000063873  | 6.897648734 | 2.786104661  | 5.85E-52 | 5.08E-50 | 354.375013 | 254.364565 | 405.12294  | 2170.501568 | 2418.811552 | 2391.016963 | Slc24a3       |
| ENSMUSG00000054203  | 0.049474092 | -4.337182952 | 9.24E-52 | 7.98E-50 | 474.28979  | 797.335078 | 563.703173 | 27.95970531 | 35.84688962 | 26.54416782 | Ifi205        |
| ENSMUSG00000030208  | 0.233376102 | -2.09927126  | 9.50E-52 | 8.17E-50 | 8672.34406 | 7396.13888 | 7901.75569 | 2159.110577 | 1675.415341 | 1761.103442 | Emp1          |
| ENSMUSG00000050830  | 25.00875292 | 4.644361213  | 1.05E-51 | 8.97E-50 | 16.1079551 | 38.1546847 | 35.9283341 | 912.3148287 | 677.6769133 | 639.1018867 | Vwc2          |
| ENSMUSG00000036896  | 0.072276823 | -3.790323103 | 1.19E-51 | 1.01E-49 | 2694.50294 | 4187.23206 | 4561.65952 | 358.2984458 | 241.5397563 | 227.6672855 | C1qc          |
| ENSMUSG00000034780  | 8.02987256  | 3.005377091  | 2.29E-51 | 1.94E-49 | 161.974438 | 115.442379 | 105.307186 | 970.3053286 | 1147.953965 | 970.9039845 | B3gal1        |
| ENSMUSG00000075289  | 3.618092281 | 1.855229205  | 2.38E-51 | 2.00E-49 | 367.798309 | 436.333061 | 431.140009 | 1425.944971 | 1518.371825 | 1518.122213 | Carns1        |
| ENSMUSG00000043687  | 10.14691493 | 3.342969251  | 2.93E-51 | 2.46E-49 | 48.3238654 | 45.0029614 | 75.5733924 | 532.2699455 | 577.8177208 | 580.9089034 | 1190005I06Rik |
| ENSMUSG00000024810  | 0.137333603 | -2.86424343  | 4.04E-51 | 3.37E-49 | 2650.6535  | 2240.36482 | 1962.43039 | 386.2581511 | 283.3611275 | 272.5881849 | Il33          |
| ENSMUSG00000030787  | 0.210046017 | -2.251222668 | 4.91E-51 | 4.07E-49 | 1612.58528 | 1400.96176 | 1574.65216 | 352.0851779 | 340.5454514 | 270.5463259 | Lyve1         |
| ENSMUSG00000041773  | 0.197365753 | -2.341056423 | 8.93E-51 | 7.38E-49 | 745.440367 | 684.827674 | 780.512086 | 164.6515979 | 138.2665743 | 133.7417686 | Enc1          |
| ENSMUSG00000004098  | 0.111067774 | -3.17048781  | 1.09E-50 | 8.99E-49 | 2020.65348 | 2258.953   | 2662.41345 | 294.094678  | 185.2089297 | 293.0067755 | Col5a3        |
| ENSMUSG00000029126  | 0.212682426 | -2.233227265 | 1.15E-50 | 9.44E-49 | 980.795489 | 904.950855 | 1019.62134 | 218.4999193 | 221.9093167 | 176.620809  | Nsg1          |
| ENSMUSG00000027796  | 7.181508863 | 2.844286992  | 1.25E-50 | 1.02E-48 | 68.9062524 | 61.6344907 | 52.0341391 | 434.9287492 | 459.1815861 | 426.7485442 | Smad9         |
| ENSMUSG00000018677  | 5.917480874 | 2.564983138  | 1.26E-50 | 1.02E-48 | 1384.38925 | 1700.32928 | 2156.93895 | 10056.17401 | 10637.13775 | 10302.1999  | Scl25a39      |
| ENSMUSG00000002012  | 3.846124599 | 1.943405501  | 1.80E-50 | 1.45E-48 | 399.119332 | 399.156701 | 410.078572 | 1448.726953 | 1460.334003 | 1737.622063 | Pnck          |
| ENSMUSG00000020097  | 0.343483351 | -1.541687922 | 1.82E-50 | 1.46E-48 | 1790.66768 | 1675.87115 | 1661.37573 | 612.0068828 | 566.722255  | 583.971692  | Sgpl1         |
| ENSMUSG00000065592  | 4.52877589  | 2.179121148  | 2.91E-50 | 2.33E-48 | 253.25285  | 206.426627 | 205.65874  | 1020.011471 | 1053.215757 | 947.4226053 | Rh145a        |
| ENSMUSG00000028583  | 0.134966946 | -2.889321969 | 4.58E-50 | 3.64E-48 | 1053.28129 | 1277.69277 | 1403.68285 | 196.7534818 | 135.7060821 | 172.5370908 | Pdpn          |
| ENSMUSG00000050288  | 2.674220559 | 1.419118458  | 5.41E-50 | 4.28E-48 | 966.477307 | 928.430661 | 1027.05479 | 2527.764469 | 2611.701798 | 2668.709795 | Fzn2          |
| ENSMUSG00000027102  | 0.183332238 | -2.4474676   | 5.60E-50 | 4.41E-48 | 647.002864 | 779.725223 | 682.638348 | 136.6918926 | 116.0756426 | 134.7626982 | Hoxd8         |
| ENSMUSG00000027330  | 3.566225666 | 1.834397998  | 1.00E-49 | 7.86E-48 | 528.87786  | 557.645392 | 564.942081 | 2030.703041 | 2104.724519 | 1749.873217 | Cdc25b        |
| ENSMUSG00000003078  | 0.210046017 | -2.251222668 | 4.91E-51 | 4.07E-49 | 1612.58528 | 1400.96176 | 1574.65216 | 352.0851779 | 340.5454514 | 270.5463259 | Lyve1         |
| ENSMUSG00000021458  | 2.417645433 | 1.273602677  | 1.97E-49 | 1.53E-47 | 2332.96883 | 2270.6929  | 2488.96632 | 5660.287008 | 5610.891723 | 5870.344806 | 2010111I01Rik |
| ENSMUSG00000054690  | 0.279278512 | -2.040223522 | 2.63E-49 | 2.04E-47 | 1797.82677 | 1962.52045 | 1852.16507 | 583.0116329 | 475.3980362 | 510.4647658 | Emcn          |
| ENSMUSG00000019944  | 4.967508101 | 2.31252232   | 3.18E-49 | 2.44E-47 | 765.127868 | 621.236533 | 558.747541 | 3480.465538 | 3297.060348 | 2898.41894  | Rhobtb1       |
| ENSMUSG000000085180 | 4.67967813  | 2.226409304  | 5.48E-49 | 4.20E-47 | 579.886384 | 426.549808 | 452.201447 | 2292.695835 | 2378.697176 | 2163.349677 | Al838599      |
| ENSMUSG00000015342  | 6.184617917 | 2.628684469  | 5.73E-49 | 4.37E-47 | 260.411791 | 218.16653  | 166.013682 | 1292.359712 | 1379.251753 | 1333.333968 | Kk            |
| ENSMUSG00000041740  | 3.262901672 | 1.706155512  | 6.80E-49 | 5.17E-47 | 3235.90921 | 3934.82415 | 3492.48166 | 11156.95796 | 11214.95547 | 12420.62868 | Rnf10         |
| ENSMUSG00000020709  | 0.104491606 | -3.258541044 | 8.14E-49 | 6.16E-47 | 347.215921 | 388.395129 | 439.812386 | 42.45733028 | 36.7003869  | 43.8999686  | Adap2         |
| ENSMUSG00000021871  | 0.296563024 | -1.753589362 | 9.83E-49 | 7.40E-47 | 2168.30974 | 2430.15992 | 2231.27344 | 739.3788737 | 665.7279501 | 620.7251552 | Pnp           |
| ENSMUSG00000024158  | 3.625294311 | 1.858098122  | 1.00E-48 | 7.52E-47 | 434.914788 | 535.143911 | 656.829435 | 1751.105988 | 1654.931404 | 1799.898764 | Hagh          |
| ENSMUSG00000043004  | 0.135158096 | -2.887280168 | 1.03E-48 | 7.65E-47 | 604.048317 | 661.347868 | 738.389211 | 102.5189195 | 97.2987004  | 70.44413768 | Gng2          |
| ENSMUSG00000053113  | 0.241448228 | -2.050214216 | 1.90E-48 | 1.41E-46 | 1098.92049 | 1145.61887 | 1176.96267 | 300.3079459 | 237.2722694 | 289.943987  | Socs3         |
| ENSMUSG00000002811  | 0.158133853 | -2.660781848 | 2.01E-48 | 1.49E-46 | 5821.236   | 4018.96012 | 4808.20223 | 856.3954181 | 648.6580027 | 812.6599071 | Ctsk          |
| ENSMUSG00000059582  | 6.317977586 | 2.659462819  | 2.31E-48 | 1.70E-46 | 330.21308  | 221.101506 | 252.737247 | 1626.840631 | 1879.401213 | 1581.419844 | Unc5c         |
| ENSMUSG00000022995  | 3.242580705 | 1.697142482  | 2.63E-48 | 1.93E-46 | 3367.45751 | 3365.43886 | 3862.91537 | 12315.73242 | 11605.85726 | 10426.75331 | Enah          |
| ENSMUSG00000059146  | 3.545924869 | 1.826161969  | 3.02E-48 | 2.20E-46 | 3079.71598 | 1692.50268 | 1658.89791 | 6267.116167 | 6321.001367 | 6680.962854 | Ntrk3         |
| ENSMUSG00000051359  | 3.587848371 | 1.843118921  | 3.45E-48 | 2.51E-46 | 358.849445 | 316.977381 | 343.177536 | 1127.708114 | 1284.513545 | 1243.492169 | Ncald         |
| ENSMUSG00000052430  | 7.369438993 | 2.881554797  | 3.52E-48 | 2.55E-46 | 97.5426171 | 68.4827674 | 80.5290247 | 652.3931238 | 629.0275631 | 540.0717222 | Bmpr1b        |
| ENSMUSG00000038330  | 2.379104883 | 1.250418874  | 4.47E-48 | 3.22E-46 | 1886.42052 | 1863.7096  | 1788.18464 | 4689.981679 | 4296.50557  | 4405.310929 | Ccr2          |
| ENSMUSG00000011521  | 3.378000142 | 1.756169389  | 6.11E-48 | 4.38E-46 | 1407.6563  | 1265.95287 | 1419.78865 | 5116.626071 | 4229.079478 | 4480.859714 | Gm48529       |
| ENSMUSG00000026840  | 11.13545831 | 3.377089033  | 1.42E-47 | 1.02E-45 | 80.5397756 | 41.0896604 | 75.5733924 | 712.454713  | 738.2752268 | 741.1948399 | Lamc3         |
| ENSMUSG00000034275  | 5.44258296  | 2.444291493  | 1.45E-47 | 1.03E-45 | 671.164797 | 493.075925 | 470.785068 | 3019.648173 | 3165.621753 | 2726.902779 | Igfbp5        |
| ENSMUSG00000026821  | 0.288387465 | -1.793919639 | 2.09E-47 | 1.48E-45 | 947.684693 | 903.97253  | 918.030882 | 245.4240799 | 272.2656617 | 280.7556212 | Ralgds        |
| ENSMUSG00000020053  | 0.101816207 | -3.295960017 | 2.16E-47 | 1.52E-45 | 10228.5515 | 8141.62272 | 13587.1402 | 1192.947426 | 830.4529429 | 1231.241015 | Igf1          |
| ENSMUSG00000020902  | 2.858295761 | 1.515155207  | 2.96E-47 | 2.08E-45 | 2498.52282 | 2264.82295 | 2081.36556 | 6652.338774 | 6437.07179  | 6485.965314 | Ntn1          |
| ENSMUSG00000019763  | 3.509902433 | 1.811430928  | 4.17E-47 | 2.91E-45 | 470.710244 | 450.029614 | 424.945469 | 1419.731703 | 1639.568452 | 1668.198855 | Rmnd1         |
| ENSMUSG00000049103  | 0.062669681 | -3.996088529 | 4.39E-47 | 3.06E-45 | 1858.67904 | 2865.51465 | 2593.0346  | 219.5354639 | 109.2476636 | 130.67898   | Ccr2          |
| ENSMUSG00000033306  | 2.946780202 | 1.559139455  | 5.24E-47 | 3.64E-45 | 6957.74172 | 6215.3003  | 6671.51997 | 19146.18487 | 21311.82938 | 18018.3853  | Lpp           |
| ENSMUSG00000001870  | 3.57572225  | 1.838234677  | 6.75E-47 | 4.67E-45 | 4833.28142 | 3929.93252 | 3803.44779 | 14894.23857 | 15722.23857 | 14328.74597 | Ltbp1         |
| ENSMUSG00000021892  | 0.262842745 | -1.927728182 | 1.13E-46 | 7.75E-45 | 1136.50572 | 1252.25632 | 1402.44394 | 338.6230976 | 329.4499856 | 327.7183796 | Sh3bp5        |
| ENSMUSG00000034353  | 4.596929825 | 2.200670643  | 1.67E-46 | 1.15E-44 | 566.463088 | 722.004034 | 812.723696 | 3130.45145  | 3258.652966 | 3254.723347 | Ramp1         |
| ENSMUSG00000028459  | 0.037274744 | -4.745657738 | 2.39E-46 | 1.63E-44 | 459.076721 | 923.539035 | 660.338003 | 21.74643746 | 32.43290512 | 21.43952016 | Cdf2          |
| ENSMUSG00000029761  | 2.603706277 | 1.380566708  | 2.43E-46 | 1.65E-44 | 24543.1543 | 20866.6992 | 22729.0075 | 59839.98263 | 59606.54946 | 57969.39973 | Cald1         |
| ENSMUSG00000029467  | 3.439146532 | 1.782055086  | 2.61E-46 | 1.77E-44 | 6008.26726 | 4993.37207 | 4605.86079 | 18161.38191 | 18054.88341 |             |               |

|                     |             |              |          |          |            |            |            |             |              |             |          |
|---------------------|-------------|--------------|----------|----------|------------|------------|------------|-------------|--------------|-------------|----------|
| ENSMUSG00000051236  | 2.154812003 | 1.107562006  | 4.77E-44 | 2.93E-42 | 4364.36095 | 4402.46362 | 4290.33866 | 9404.81643  | 9746.086491  | 8985.200807 | MsrB3    |
| ENSMUSG00000021701  | 0.240072779 | -2.058456267 | 4.84E-44 | 2.96E-42 | 1231.36368 | 1362.80707 | 1372.71014 | 348.978544  | 268.8516722  | 335.8858159 | PIK2     |
| ENSMUSG00000028557  | 3.020640524 | 1.594854504  | 5.16E-44 | 3.15E-42 | 2050.18473 | 2394.94021 | 2330.38608 | 6722.75581  | 6374.771871  | 7364.98564  | Rnf11    |
| ENSMUSG00000058793  | 2.321874586 | 1.215290048  | 5.39E-44 | 3.27E-42 | 2996.07965 | 2700.17769 | 2787.54316 | 6714.471452 | 6534.37588   | 6453.295569 | Csd1     |
| ENSMUSG00000019907  | 2.906027947 | 1.539048577  | 5.86E-44 | 3.54E-42 | 5030.15643 | 4238.10498 | 4313.87791 | 13636.05183 | 13395.64125  | 12445.13099 | Ppp1r12a |
| ENSMUSG00000060586  | 0.059343341 | -0.074770038 | 8.07E-44 | 4.86E-42 | 7058.86389 | 15399.8177 | 9801.00176 | 676.2106506 | 774.1221164  | 463.5020073 | H2-Eb1   |
| ENSMUSG00000048458  | 3.516194887 | 1.814015035  | 8.22E-44 | 4.94E-42 | 533.352292 | 424.593158 | 469.54616  | 1756.283711 | 1654.931404  | 1612.04773  | Fam212b  |
| ENSMUSG00000038156  | 0.258560533 | -1.951426016 | 8.29E-44 | 4.96E-42 | 2398.29554 | 1881.31945 | 2221.36217 | 541.5898473 | 533.4358575  | 606.4321417 | Spon1    |
| ENSMUSG00000003118  | 0.073897246 | -3.758335592 | 1.29E-43 | 7.69E-42 | 647.002864 | 1118.22576 | 1036.96606 | 78.70139272 | 75.96126611  | 52.06740611 | Clec10a  |
| ENSMUSG00000018830  | 4.181246291 | 2.063933026  | 1.35E-43 | 8.04E-42 | 64977.7012 | 52676.9447 | 45340.3187 | 230927.4905 | 225597.2789  | 225012.8687 | Myh11    |
| ENSMUSG00000073460  | 5.943262862 | 2.571255191  | 1.75E-43 | 1.04E-41 | 105.596595 | 109.572428 | 121.412991 | 567.4784633 | 664.8744528  | 762.63436   | Pnldc1   |
| ENSMUSG00000030849  | 3.946953014 | 1.980739345  | 2.83E-43 | 1.67E-41 | 510.980132 | 412.853255 | 423.706561 | 1943.717291 | 1751.376607  | 1630.424462 | Fgfr2    |
| ENSMUSG00000030607  | 0.174478325 | -2.518880266 | 3.00E-43 | 1.77E-41 | 1592.0029  | 1577.0603  | 1248.81934 | 297.201312  | 264.5841853  | 209.290554  | Acan     |
| ENSMUSG00000015766  | 0.177944431 | -2.490501313 | 3.46E-43 | 2.02E-41 | 651.477296 | 668.196145 | 625.648577 | 140.8340712 | 97.2987004   | 109.2394599 | Eps8     |
| ENSMUSG00000032946  | 2.717000187 | 1.442014665  | 6.04E-43 | 3.53E-41 | 1164.2472  | 997.891754 | 1098.91146 | 2860.174298 | 2971.877849  | 3029.09792  | Rasgrp2  |
| ENSMUSG00000039462  | 0.006105698 | -7.355627959 | 7.23E-43 | 4.21E-41 | 1714.60233 | 469.596119 | 945.286859 | 3.106633923 | 7.681476348  | 8.167436252 | Col10a1  |
| ENSMUSG000000009185 | 0.038515638 | -4.698411867 | 8.02E-43 | 4.65E-41 | 607.627862 | 1318.78244 | 1948.63848 | 35.20851779 | 52.916883706 | 39.81625173 | Ccl8     |
| ENSMUSG00000069763  | 0.233279847 | -2.099866417 | 8.74E-43 | 5.05E-41 | 908.309691 | 830.598136 | 766.884097 | 217.4643746 | 177.5274534  | 190.9138224 | Tmem100  |
| ENSMUSG00000030533  | 2.541248647 | 1.345537542  | 9.14E-43 | 5.27E-41 | 1228.67902 | 1217.03661 | 1352.88762 | 3096.278477 | 3208.296621  | 3341.502357 | Unc45a   |
| ENSMUSG00000017309  | 0.280243598 | -1.835246679 | 9.67E-43 | 5.55E-41 | 868.039804 | 791.465126 | 765.645189 | 219.5354639 | 221.9093167  | 238.8975104 | Cd300lg  |
| ENSMUSG00000026475  | 0.077984064 | -3.680676849 | 1.06E-42 | 6.04E-41 | 356.164785 | 357.088716 | 522.819207 | 34.17297315 | 32.43290013  | 29.60695641 | Rgs16    |
| ENSMUSG00000025666  | 2.899547778 | 1.535827911  | 2.07E-42 | 1.18E-40 | 1335.39778 | 1216.05828 | 1246.34152 | 3814.946458 | 3915.845943  | 3576.316149 | Tmem47   |
| ENSMUSG00000098557  | 0.298072757 | -1.746263571 | 2.34E-42 | 1.33E-40 | 1890.00007 | 1920.45246 | 2244.90143 | 642.0376774 | 602.5691446  | 559.4693833 | Kctd12   |
| ENSMUSG00000028631  | 3.298708039 | 1.721901094  | 2.44E-42 | 1.38E-40 | 504.715927 | 414.809905 | 421.228745 | 1497.397551 | 1455.213019  | 1477.285032 | Xcnf4    |
| ENSMUSG00000027435  | 0.297908071 | -1.747060886 | 4.00E-42 | 2.26E-40 | 4276.66208 | 3392.83196 | 3615.13376 | 1164.987721 | 1066.871715  | 1131.189921 | Cd93     |
| ENSMUSG000000101389 | 0.052256954 | -4.258233166 | 5.36E-42 | 3.01E-40 | 259.517055 | 246.537963 | 310.965926 | 18.63980354 | 10.24196846  | 14.29301344 | Ms4a4a   |
| ENSMUSG00000046329  | 3.537474637 | 2.232719804  | 5.82E-42 | 3.26E-40 | 1135.61084 | 933.322287 | 906.880709 | 3264.036708 | 3503.606102  | 3768.250901 | Slc25a23 |
| ENSMUSG00000034684  | 2.09381314  | 1.066132696  | 5.94E-42 | 3.32E-40 | 1612.58528 | 1661.19627 | 1627.92521 | 3428.688306 | 3411.428996  | 3423.176719 | Sema3f   |
| ENSMUSG00000020689  | 2.991528016 | 1.580882574  | 6.30E-42 | 3.51E-40 | 1478.35233 | 1279.64943 | 1494.12324 | 4081.08143  | 4054.966014  | 4581.931737 | Itgb3    |
| ENSMUSG00000061353  | 0.321265969 | -1.63815993  | 6.42E-42 | 3.56E-40 | 10127.4293 | 10102.1865 | 12156.166  | 3654.437038 | 3233.901542  | 3516.081307 | Xcl12    |
| ENSMUSG00000038264  | 0.208638316 | -2.260923963 | 8.30E-42 | 4.59E-40 | 561.988656 | 545.905489 | 659.099095 | 128.4075355 | 126.3176111  | 113.323178  | Sema7a   |
| ENSMUSG00000041515  | 0.190508164 | -3.464636828 | 1.31E-41 | 7.23E-40 | 707.85139  | 1182.79523 | 1092.71692 | 82.84357128 | 110.9546584  | 75.54878533 | Irf8     |
| ENSMUSG00000024663  | 0.290520817 | -1.78328655  | 1.50E-41 | 8.23E-40 | 1062.23015 | 1161.27207 | 1222.80227 | 364.5117136 | 312.3800381  | 324.655591  | Rab31l1  |
| ENSMUSG00000037656  | 2.214193685 | 1.146781426  | 1.79E-41 | 9.79E-40 | 1014.80117 | 1041.91639 | 1036.96606 | 2298.909103 | 2269.449512  | 2280.756573 | Slc20a2  |
| ENSMUSG00000020421  | 0.125391513 | -2.995488396 | 1.95E-41 | 1.06E-39 | 1032.05973 | 1605.43173 | 2680.99707 | 297.201312  | 223.616115   | 259.316101  | Igfbbp3  |
| ENSMUSG00000022636  | 3.446287388 | 1.785043014  | 1.97E-41 | 1.07E-39 | 648.110808 | 380.568522 | 325.832823 | 1174.307623 | 1319.506937  | 1143.441075 | Alcam    |
| ENSMUSG00000030789  | 0.03737515  | -4.727925595 | 2.46E-41 | 1.34E-39 | 311.207408 | 504.105561 | 504.252655 | 38.31515172 | 19.63043956  | 38.31515172 | Itgax    |
| ENSMUSG00000024538  | 0.296081688 | -1.755932828 | 3.72E-41 | 2.02E-39 | 4231.91776 | 3531.75415 | 4545.55372 | 1260.257828 | 1169.2914    | 1214.906143 | Ppic     |
| ENSMUSG00000006221  | 4.213388723 | 2.074981024  | 5.22E-41 | 2.82E-39 | 2278.38076 | 2765.72548 | 2559.58408 | 12199.75142 | 10970.00172  | 8864.731122 | Hspb7    |
| ENSMUSG00000049107  | 4.143105876 | 2.050712688  | 6.37E-41 | 3.42E-39 | 448.78418  | 210.339928 | 221.764545 | 836.7200699 | 1027.610836  | 958.6528301 | Ntf3     |
| ENSMUSG00000058818  | 0.099312361 | -3.331882892 | 6.59E-41 | 3.53E-39 | 743.650595 | 1303.12923 | 950.242492 | 113.9099105 | 86.20323457  | 98.00923503 | Pirb     |
| ENSMUSG00000041075  | 2.545620696 | 1.34801747   | 7.20E-41 | 3.85E-39 | 1165.14209 | 1020.39323 | 1100.15037 | 2876.743013 | 2771.734513  | 2717.714413 | Fzd7     |
| ENSMUSG00000031661  | 2.954281924 | 1.562807507  | 8.80E-41 | 4.69E-39 | 934.261397 | 930.387311 | 1080.32784 | 3106.633923 | 2755.943014  | 2830.016661 | Nkd1     |
| ENSMUSG00000027339  | 0.207394706 | -2.269549028 | 1.64E-40 | 8.71E-39 | 1429.13357 | 1541.84059 | 1863.31774 | 375.9027047 | 342.2524462  | 283.8184098 | Rassf2   |
| ENSMUSG00000034853  | 4.248755792 | 2.087040423  | 2.46E-40 | 1.30E-38 | 441.178993 | 370.785269 | 325.832823 | 1479.793292 | 1604.575059  | 1761.103442 | Acto11   |
| ENSMUSG00000029552  | 3.226057157 | 1.689772     | 3.49E-40 | 1.84E-38 | 742.755708 | 661.347868 | 702.460877 | 2011.027693 | 2452.951447  | 2331.80305  | Tes      |
| ENSMUSG00000062168  | 39.8595152  | 5.316852258  | 3.49E-40 | 1.84E-38 | 9.84375035 | 2.93497575 | 14.8668969 | 403.86241   | 384.0738174  | 280.7556212 | Ppef1    |
| ENSMUSG00000039257  | 12.22197666 | 3.611405726  | 3.82E-40 | 2.00E-38 | 30.4261374 | 33.2630585 | 27.2559776 | 288.9169548 | 436.1371571  | 389.995081  | Tmem2b   |
| ENSMUSG00000026691  | 35.51783364 | 5.150471684  | 5.63E-40 | 2.94E-38 | 30.4261374 | 18.5881797 | 32.216099  | 1319.283873 | 1064.311223  | 491.0671047 | Fmo3     |
| ENSMUSG00000040447  | 0.285711785 | -0.807367548 | 7.78E-40 | 4.05E-38 | 1150.8239  | 1246.38637 | 1153.42342 | 372.7960708 | 346.519933   | 295.0486346 | Spm2     |
| ENSMUSG00000015947  | 0.030964378 | -5.013246703 | 9.18E-40 | 4.77E-38 | 346.321035 | 770.920296 | 755.733924 | 24.85307138 | 17.92344481  | 15.31394297 | Fcgr1    |
| ENSMUSG00000052056  | 0.28893515  | -1.791182373 | 1.19E-39 | 6.15E-38 | 619.261386 | 585.038499 | 618.215128 | 169.8293211 | 174.9669613  | 181.7254566 | Zfp217   |
| ENSMUSG00000052384  | 0.16155469  | -2.577296025 | 1.37E-39 | 7.05E-38 | 630.894909 | 895.167603 | 823.873868 | 136.6918926 | 139.1200716  | 136.6918926 | Nros     |
| ENSMUSG00000026536  | 0.045622135 | -4.454122235 | 1.53E-39 | 7.88E-38 | 388.380696 | 765.050344 | 748.300476 | 28.99524995 | 35.84688962  | 21.49352016 | Pitpna   |
| ENSMUSG00000040543  | 3.657269022 | 1.876837217  | 1.56E-39 | 7.99E-38 | 348.110808 | 302.302502 | 344.416444 | 1079.037516 | 1258.908624  | 1313.936307 | Mdm3     |
| ENSMUSG00000026110  | 3.289131755 | 1.7177068    | 2.41E-39 | 1.23E-37 | 940.525602 | 767.98532  | 755.733924 | 2656.172004 | 2863.483683  | 2593.16101  | Mgat4a   |
| ENSMUSG00000045312  | 0.161119295 | -2.633798816 | 2.69E-39 | 1.37E-37 | 960.213102 | 870.709471 | 604.22203  | 198.8245711 | 136.5595795  | 131.6999096 | Lhfp12   |
| ENSMUSG00000040613  | 0.223216482 | -2.163484534 | 3.47E-39 | 1.77E-37 | 885.042645 | 1152.46714 | 914.314174 | 204.0022943 | 227.6672851  | 227.6672851 | Apobec1  |
| ENSMUSG00000062593  | 0.129701738 | -2.946730287 | 3.56E-39 | 1.81E-37 | 1127.55686 | 1641.62977 | 1093.95568 | 182.2558568 | 133.9990874  | 185.8091747 | Llrb4a   |
| ENSMUSG00000031875  | 0.207768758 | -2.266949363 | 3.64E-39 | 1.84E-37 | 1622.42903 | 1621.08494 | 2148.9663  | 421.4666689 | 334.5709698  | 364.4718428 | Cmtm3    |
| ENSMUSG00000026259  | 4.304569663 | 2.105869015  | 3.82E-39 | 1.93E-37 | 153.025574 | 139.900511 | 187.075119 | 661.7130256 | 684.5048923  | 710.5669539 | Ngef     |
| ENSMUSG00000020846  | 0.263054704 | -1.926565245 | 4.11E-39 | 2.07E-37 | 1694.01995 | 1800.11846 | 2242.42361 | 510.523508  | 504.4169468  | 493.1089637 | Rfnb     |
| ENSMUSG00000031239  | 0.088320394 | -0.031109585 | 4.35E-39 | 2.18E-37 | 2242.58531 | 1394.11348 | 2030.31114 | 232.9975442 | 163.01978    | 134.762682  | Int2a    |
| ENSMUSG00000035873  | 4.103138148 | 2.036727729  | 5.72E-39 | 2.86E-37 | 575.411952 | 496.989226 | 421.228745 | 1887.797881 | 2246.405083  | 2005.1056   | Pawr     |
| ENSMUSG00000031328  | 3.703895386 | 1.889043351  | 6.21E-39 | 3.09E-37 | 72784.6901 | 59661.2086 | 51740.5178 | 222608.9604 | 233294.1182  | 226317.6167 | Flna     |
| ENSMUSG00000053965  | 2.917931541 | 1.583967439  | 6.26E-39 | 3.11E-37 | 2061.81826 | 1625.97656 | 1800.13343 | 5544.306008 | 5609.184729  | 5302.707987 | Pde5a    |
| ENSMUSG00000042524  | 2.570819936 | 1.362228565  | 7.39E-39 | 3.66E-37 | 3369.24728 | 3629.58667 | 3999.19526 | 9824.212009 | 9303.974852  | 9136.298378 | Sun2     |
| ENSMUSG00000026389  | 0.325429852 | -1.619581498 | 7.94E-39 | 3.91E-37 | 2185.31258 | 1783.48693 | 1990.92527 | 630.6466864 | 673.         |             |          |

|                     |             |              |          |          |             |            |            |  |             |             |             |               |
|---------------------|-------------|--------------|----------|----------|-------------|------------|------------|--|-------------|-------------|-------------|---------------|
| ENSMUSG00000073414  | 62.81613464 | 5.973063265  | 1.86E-37 | 8.56E-36 | 8.94886395  | 6.84827674 | 17.344713  |  | 601.6514364 | 378.0993358 | 1053.599277 | Mpig6b        |
| ENSMUSG00000053646  | 2.73131176  | 1.449593997  | 2.79E-37 | 1.28E-35 | 1053.28129  | 930.387311 | 992.365366 |  | 2817.716968 | 2482.823855 | 2831.037591 | Plxbm1        |
| ENSMUSG00000059187  | 16.12663923 | 4.011373909  | 3.25E-37 | 1.48E-35 | 16.1079551  | 9.78325249 | 24.778165  |  | 249.5662585 | 268.8516722 | 279.7346916 | Fam19a1       |
| ENSMUSG00000029838  | 0.102135941 | -3.291437458 | 3.70E-37 | 1.68E-35 | 937.840942  | 586.995149 | 1087.76129 |  | 89.05683913 | 94.75382089 | 82.69529205 | Ptn           |
| ENSMUSG00000021870  | 3.486183132 | 1.801648357  | 5.05E-37 | 2.29E-35 | 4594.34675  | 4009.17687 | 3446.64262 |  | 14800.00401 | 14523.11128 | 12697.30058 | Slmap         |
| ENSMUSG00000018920  | 0.124122217 | -3.010166725 | 5.90E-37 | 2.67E-35 | 1038.06822  | 1832.40319 | 1689.87016 |  | 210.2155621 | 173.2599665 | 182.7463861 | Cxcl16        |
| ENSMUSG00000000538  | 2.12305746  | 1.086143418  | 6.05E-37 | 2.73E-35 | 2373.23872  | 2225.68994 | 2258.52942 |  | 4701.37267  | 4819.69966  | 5040.329097 | Tom1l2        |
| ENSMUSG00000006119  | 0.350317685 | -1.513264274 | 6.13E-37 | 2.76E-35 | 1411.23585  | 1623.04159 | 1605.62486 |  | 532.2699455 | 570.9897418 | 520.6740611 | Prpc          |
| ENSMUSG00000031387  | 0.190291293 | -2.39371854  | 6.99E-37 | 3.14E-35 | 388.380696  | 445.137988 | 433.617825 |  | 82.84357128 | 69.13328713 | 89.84179877 | Renbp         |
| ENSMUSG00000062960  | 0.267018183 | -1.904990108 | 7.82E-37 | 3.50E-35 | 2217.52849  | 1734.57067 | 1793.93889 |  | 561.2651954 | 477.1053039 | 497.1926819 | Kdr           |
| ENSMUSG00000054618  | 20.96505383 | 4.389914629  | 8.39E-37 | 3.75E-35 | 13.4232959  | 8.80492724 | 8.67235651 |  | 212.2866514 | 244.1002484 | 201.1231177 | Gm9951        |
| ENSMUSG00000022419  | 0.266243219 | -1.909183315 | 8.66E-37 | 3.86E-35 | 2764.30408  | 3160.96888 | 3494.95967 |  | 908.1726502 | 718.6447872 | 882.0831152 | Deptor        |
| ENSMUSG00000019789  | 2.752983994 | 1.460996222  | 9.05E-37 | 4.02E-35 | 882.357986  | 767.006995 | 768.123005 |  | 2344.473067 | 2103.017525 | 2214.396154 | Hcy2          |
| ENSMUSG00000037946  | 0.120231667 | -3.056111168 | 9.18E-37 | 4.07E-35 | 267.571032  | 360.023692 | 349.372076 |  | 40.386241   | 40.11437648 | 36.75346313 | Fgd3          |
| ENSMUSG00000000915  | 2.747100243 | 1.457909556  | 1.03E-36 | 4.57E-35 | 584.360816  | 685.805999 | 666.532543 |  | 1804.954309 | 1813.681915 | 1696.784881 | Hip1r         |
| ENSMUSG00000050335  | 0.087233648 | -3.51897147  | 1.10E-36 | 4.87E-35 | 1805.88075  | 4038.52663 | 3240.98352 |  | 300.3079459 | 248.3677352 | 244.002158  | Lgals1        |
| ENSMUSG00000004266  | 0.117935256 | -3.083933033 | 1.22E-36 | 5.37E-35 | 662.215933  | 1104.52921 | 927.590593 |  | 90.09238377 | 121.1966268 | 93.9255169  | Ptpn6         |
| ENSMUSG00000021493  | 3.043536566 | 1.605748699  | 1.37E-36 | 5.99E-35 | 2785.78135  | 3561.10391 | 5604.87094 |  | 9875.989241 | 9859.601641 | 10240.94413 | Pdlim7        |
| ENSMUSG00000015340  | 0.074563976 | -3.745377395 | 1.38E-36 | 6.03E-35 | 1429.13357  | 3534.68912 | 2611.61822 |  | 195.7179372 | 184.3554323 | 184.7882452 | Cybb          |
| ENSMUSG00000001494  | 349.3967531 | 8.448722392  | 1.47E-36 | 6.42E-35 | 22.3721599  | 24.4581312 | 84.2457489 |  | 16720.93932 | 13892.37672 | 14889.23629 | Sost          |
| ENSMUSG00000043415  | 3.621050905 | 1.856408458  | 1.62E-36 | 7.03E-35 | 462.656266  | 492.0976   | 536.447195 |  | 1946.823925 | 1534.588275 | 1914.242872 | Otdud1        |
| ENSMUSG00000027208  | 0.249868177 | -2.000760923 | 1.63E-36 | 7.07E-35 | 1174.09095  | 914.734107 | 929.181054 |  | 242.317446  | 250.9282274 | 261.3579601 | Fgf7          |
| ENSMUSG00000028926  | 0.244940709 | -2.029495526 | 2.28E-36 | 9.85E-35 | 1369.17618  | 1025.28486 | 1209.17428 |  | 319.9832941 | 276.5331485 | 286.8811984 | Cdk14         |
| ENSMUSG00000040133  | 0.104170505 | -4.605593867 | 2.41E-36 | 1.04E-34 | 242.514213  | 306.215803 | 457.157079 |  | 13.46208033 | 15.3629527  | 12.25115438 | Gpr176        |
| ENSMUSG00000057914  | 4.382805035 | 2.131854503  | 2.93E-36 | 1.26E-34 | 240.72444   | 197.6217   | 188.314027 |  | 799.4404629 | 963.598533  | 990.3016456 | Cacnb2        |
| ENSMUSG00000097617  | 2.949633761 | 1.560535834  | 3.23E-36 | 1.38E-34 | 288.153419  | 292.519249 | 327.071731 |  | 900.9238377 | 858.6183562 | 912.7110012 | Gm10687       |
| ENSMUSG00000041482  | 0.205849836 | -2.280335799 | 3.54E-36 | 1.51E-34 | 793.764233  | 593.843426 | 744.583055 |  | 149.1184283 | 133.14559   | 157.2231479 | Plezo2        |
| ENSMUSG00000049723  | 0.030057774 | -5.056118023 | 6.10E-36 | 2.60E-34 | 1093.55118  | 3492.62114 | 1487.9286  |  | 75.59475879 | 46.08885809 | 61.25577189 | Mmp12         |
| ENSMUSG00000073421  | 0.071834043 | -3.799188466 | 6.24E-36 | 2.66E-34 | 503.33827   | 13477.4086 | 9829.49665 |  | 716.5968916 | 865.4463352 | 508.4229067 | H2-Ab1        |
| ENSMUSG00000040896  | 6.74121085  | 2.75300775   | 7.95E-36 | 3.36E-34 | 73.3806844  | 76.3093694 | 117.696267 |  | 584.0471775 | 650.3649974 | 551.301947  | Kcnd3         |
| ENSMUSG00000044968  | 7.431619471 | 2.893676632  | 7.93E-36 | 3.36E-34 | 148.110808  | 294.4759   | 184.597303 |  | 1794.598863 | 2246.405083 | 2125.575285 | Napap1        |
| ENSMUSG00000020057  | 0.21959087  | -2.187110021 | 9.32E-36 | 3.94E-34 | 320.85232   | 1467.48787 | 1853.40648 |  | 375.9027047 | 334.5709698 | 308.3207185 | Dram1         |
| ENSMUSG00000001128  | 0.200985931 | -2.314833576 | 9.69E-36 | 4.08E-34 | 936.05117   | 1330.52234 | 1359.08216 |  | 242.317446  | 238.9792642 | 247.0649466 | Cfp           |
| ENSMUSG00000029919  | 0.099799654 | -3.324821381 | 1.03E-35 | 4.35E-34 | 398.22446   | 437.311386 | 615.737312 |  | 59.02604454 | 46.94235546 | 38.7953222  | Hpgds         |
| ENSMUSG00000031880  | 4.151034912 | 2.053471066  | 1.04E-35 | 4.35E-34 | 926.207419  | 889.297651 | 1152.18341 |  | 4450.770867 | 3437.033917 | 4422.666731 | Rrad          |
| ENSMUSG00000049037  | 0.089846906 | -3.476387366 | 1.04E-35 | 4.36E-34 | 470.710244  | 853.099617 | 654.134362 |  | 50.74168741 | 54.62383181 | 72.48599674 | Clec4a1       |
| ENSMUSG00000032724  | 3.217279538 | 1.685823373  | 1.19E-35 | 4.95E-34 | 313.210238  | 302.30250  | 268.843052 |  | 876.0707663 | 971.2800093 | 1003.573729 | Abtb2         |
| ENSMUSG00000028599  | 0.213706262 | -2.226298913 | 1.25E-35 | 5.19E-34 | 1242.9972   | 1818.70664 | 1412.3552  |  | 327.2321066 | 299.5775776 | 329.7602387 | Tnfrsf1b      |
| ENSMUSG00000020922  | 5.534185079 | 2.40666701   | 1.30E-35 | 5.41E-34 | 554.829565  | 665.261169 | 753.256108 |  | 3508.425244 | 2803.738867 | 4245.024992 | Lsm12         |
| ENSMUSG00000020101  | 0.275504194 | -1.859853815 | 1.53E-35 | 6.35E-34 | 2091.34951  | 2631.69492 | 2267.20177 |  | 730.0589719 | 598.3016578 | 598.2647055 | Vs1r          |
| ENSMUSG00000022100  | 2.460439048 | 1.298915777  | 1.97E-35 | 8.15E-34 | 849.247189  | 855.056267 | 877.146915 |  | 2060.733836 | 2008.279316 | 2281.777503 | Xpo7          |
| ENSMUSG00000045573  | 0.073786297 | -3.760503275 | 1.98E-35 | 8.17E-34 | 297.83533   | 1275.37612 | 2350.20861 |  | 201.931205  | 126.3176111 | 145.992923  | Penk          |
| ENSMUSG00000040740  | 32.77945812 | 5.0347201    | 2.02E-35 | 8.32E-34 | 15.2130687  | 18.5881797 | 8.67235651 |  | 316.8766602 | 403.7042569 | 693.2111519 | Slc25a34      |
| ENSMUSG00000037145  | 158.7218557 | 7.310356988  | 2.06E-35 | 8.45E-34 | 2.68465919  | 1.9566505  | 2.47781615 |  | 379.0093386 | 432.7231676 | 318.5300138 | ZZ10407C18Rik |
| ENSMUSG00000028381  | 0.290666742 | -1.782562087 | 2.07E-35 | 8.47E-34 | 1632.227279 | 1878.38448 | 2171.80585 |  | 544.6964812 | 561.6012708 | 544.1554403 | Ugcg          |
| ENSMUSG00000036446  | 0.133579326 | -2.904231359 | 2.24E-35 | 9.15E-34 | 21249.0775  | 13388.381  | 17518.1601 |  | 2817.716968 | 1678.829331 | 2471.670396 | Lum           |
| ENSMUSG00000019647  | 0.273230577 | -1.871809153 | 2.30E-35 | 9.35E-34 | 711.434684  | 603.626678 | 683.877256 |  | 171.9004104 | 178.3809507 | 196.0184701 | Sema6a        |
| ENSMUSG00000020160  | 3.184361163 | 1.671003972  | 2.31E-35 | 9.38E-34 | 190.610802  | 183.925147 | 201.942016 |  | 622.3623293 | 616.2251026 | 594.1809873 | Meis1         |
| ENSMUSG00000033032  | 0.306107348 | -1.707890416 | 2.63E-35 | 1.07E-33 | 460.880712  | 840.381389 | 766.84097  |  | 270.2771513 | 229.5907931 | 257.2742419 | Afp1l1        |
| ENSMUSG00000010051  | 3.767927943 | 1.913771376  | 2.69E-35 | 1.09E-33 | 866.235812  | 340.457187 | 376.628054 |  | 1418.696158 | 1568.728717 | 1476.264103 | Hyal1         |
| ENSMUSG00000028238  | 0.077071133 | -3.697665595 | 2.94E-35 | 1.19E-33 | 282.784101  | 251.429589 | 203.180924 |  | 17.6042589  | 17.06994744 | 22.46044969 | Atp6v0d2      |
| ENSMUSG00000023913  | 0.100413483 | -3.315975102 | 3.35E-35 | 1.35E-33 | 769.6023    | 1366.72037 | 909.358525 |  | 108.7321873 | 79.37525559 | 118.4278257 | Pla2g7        |
| ENSMUSG00000024013  | 0.096599977 | -3.229720973 | 5.36E-35 | 2.15E-33 | 359.744331  | 557.645392 | 408.839664 |  | 44.52841956 | 55.47732918 | 40.8378126  | Fgd2          |
| ENSMUSG00000038521  | 0.237508832 | -2.071871021 | 5.56E-35 | 2.22E-33 | 11094.8015  | 8269.78333 | 8206.52707 |  | 2456.311889 | 1920.369807 | 2182.747338 | C1s1          |
| ENSMUSG00000040964  | 2.69407913  | 1.429792226  | 5.81E-35 | 2.32E-33 | 974.531285  | 1189.6435  | 1136.0783  |  | 2945.088959 | 2900.184077 | 3041.349074 | Arhgef10l     |
| ENSMUSG00000071984  | 0.196264572 | -2.349128325 | 6.80E-35 | 2.71E-33 | 4721.42062  | 3156.07725 | 4145.38641 |  | 880.2129449 | 659.7534685 | 820.8273433 | Fndc1         |
| ENSMUSG00000027533  | 0.246983303 | -2.017514584 | 8.42E-35 | 3.35E-33 | 1034.48867  | 1195.51345 | 1119.9729  |  | 324.1254726 | 233.0047825 | 271.5672554 | Fabp5         |
| ENSMUSG00000034845  | 0.352376    | -1.504812428 | 1.02E-34 | 4.04E-33 | 6233.03999  | 6693.70135 | 5601.1034  |  | 2398.321389 | 2071.73006  | 2057.173006 | Plvap         |
| ENSMUSG00000040811  | 3.042418009 | 1.605218384  | 1.06E-34 | 4.19E-33 | 597.784112  | 618.301557 | 489.368689 |  | 1669.297961 | 1747.19012  | 1781.522033 | Em12          |
| ENSMUSG00000038305  | 2.679013243 | 1.421701713  | 1.25E-34 | 4.94E-33 | 469.815358  | 463.726168 | 429.901101 |  | 1267.506641 | 1248.666655 | 1140.378287 | Spats2l       |
| ENSMUSG00000026527  | 15.22860997 | 3.928712357  | 1.34E-34 | 5.28E-33 | 54.5880701  | 21.5231555 | 35.9283341 |  | 506.3813295 | 701.5748398 | 506.3810476 | Rgs7          |
| ENSMUSG00000047945  | 0.098810115 | -3.33919745  | 1.42E-34 | 5.57E-33 | 803.607983  | 1274.7578  | 1572.17474 |  | 96.30565161 | 133.14559   | 130.67888   | Mkcs11        |
| ENSMUSG000000008855 | 2.294521911 | 1.198193584  | 1.68E-34 | 6.58E-33 | 1803.19609  | 1774.682   | 1647.74774 |  | 4141.143019 | 3751.12099  | 4105.157646 | Hdac5         |
| ENSMUSG00000002900  | 0.134430141 | -2.895071447 | 1.74E-34 | 6.81E-33 | 3328.0825   | 2175.79535 | 2139.59424 |  | 432.8576599 | 300.4310749 | 295.0486346 | Lamb1         |
| ENSMUSG00000024781  | 0.371580493 | -1.428253327 | 1.85E-34 | 7.22E-33 | 2342.81258  | 2220.79831 | 2703.93211 |  | 868.8219538 | 748.5171952 | 851.4552293 | Lipa          |
| ENSMUSG00000039323  | 0.142981579 | -2.806098809 | 1.97E-34 | 7.66E-33 | 2296.27849  | 3397.72359 | 3035.32478 |  | 324.1254726 | 384.0738174 | 540.0717222 | Igfbbp2       |
| ENSMUSG00000022463  | 2.540115447 | 1.344894069  | 2.10E-34 | 8.15E-33 |             |            |            |  |             |             |             |               |

|                     |             |              |          |          |            |            |            |             |             |             |               |
|---------------------|-------------|--------------|----------|----------|------------|------------|------------|-------------|-------------|-------------|---------------|
| ENSMUSG00000026482  | 0.30654847  | -1.705812893 | 3.07E-33 | 1.12E-31 | 1194.67334 | 1077.1361  | 1277.31422 | 405.9334993 | 335.4244672 | 347.1160407 | Rgl1          |
| ENSMUSG00000012519  | 0.192043949 | -2.380491586 | 3.55E-33 | 1.30E-31 | 348.110808 | 422.636507 | 369.194606 | 82.84357128 | 69.9867845  | 66.36041955 | Mklk          |
| ENSMUSG00000042613  | 3.123631041 | 1.643224054  | 4.00E-33 | 1.46E-31 | 5916.09396 | 7339.39602 | 7998.39052 | 21228.66514 | 22430.76443 | 22718.74487 | Pbxip1        |
| ENSMUSG00000028436  | 4.139568181 | 2.049480281  | 4.04E-33 | 1.47E-31 | 1087.28697 | 1249.32134 | 1355.36543 | 4566.751867 | 4503.051255 | 6207.251552 | Dcaf12        |
| ENSMUSG00000029658  | 14.27690642 | 3.835611499  | 4.07E-33 | 1.48E-31 | 12.5284095 | 33.2630585 | 24.781615  | 296.165763  | 352.4944146 | 350.1788293 | Wdr95         |
| ENSMUSG00000013444  | 0.269714344 | -1.890495846 | 4.25E-33 | 1.54E-31 | 654.161955 | 788.53015  | 732.194671 | 204.0022943 | 174.1134639 | 209.290554  | Slc43a2       |
| ENSMUSG00000026305  | 2.843995196 | 1.507919028  | 4.28E-33 | 1.55E-31 | 2896.74726 | 3658.93643 | 3140.63196 | 9121.077198 | 9786.200867 | 8667.691723 | Lrrrip1       |
| ENSMUSG00000013584  | 0.070706115 | -3.822021202 | 4.49E-33 | 1.62E-31 | 307.84092  | 444.159663 | 338.221904 | 36.24406244 | 25.60492116 | 15.31394297 | Alhd1a2       |
| ENSMUSG00000015950  | 0.10445888  | -3.258992955 | 4.92E-33 | 1.77E-31 | 640.738659 | 1259.1046  | 939.092319 | 100.4478302 | 110.9546584 | 84.7371512  | Ncf1          |
| ENSMUSG00000026888  | 3.383589338 | 1.758554481  | 5.98E-33 | 2.14E-31 | 294.573874 | 279.801021 | 322.116099 | 891.6039359 | 1101.865107 | 999.4900114 | Grb1a         |
| ENSMUSG00000021262  | 0.285557644 | -1.808146093 | 6.07E-33 | 2.17E-31 | 589.573885 | 681.892698 | 716.088866 | 185.3624907 | 203.1323745 | 180.7045271 | Evl           |
| ENSMUSG00000023972  | 0.136108777 | -2.877167994 | 6.08E-33 | 2.17E-31 | 332.897739 | 261.212841 | 354.327709 | 38.31515172 | 42.6748686  | 47.98368798 | Ptk7          |
| ENSMUSG00000025372  | 0.230553288 | -2.116827855 | 6.10E-33 | 2.18E-31 | 1200.04266 | 1048.76467 | 1193.06847 | 324.1254726 | 248.3677352 | 221.5417083 | Baiap2        |
| ENSMUSG00000024247  | 3.0669648   | 1.616811609  | 6.89E-33 | 2.45E-31 | 1055.07106 | 1391.1785  | 1300.85348 | 3914.358743 | 3664.917715 | 3908.118247 | Pkdc          |
| ENSMUSG00000033066  | 0.251954038 | -1.988767514 | 7.17E-33 | 2.55E-31 | 1741.44893 | 1930.23572 | 2252.33488 | 581.9760883 | 440.4046439 | 470.648514  | Gas7          |
| ENSMUSG00000033544  | 0.064903183 | -3.945566963 | 1.13E-32 | 3.99E-31 | 1039.87221 | 575.255246 | 1225.28008 | 76.63030344 | 61.45181078 | 72.48599674 | Angptl1       |
| ENSMUSG00000022096  | 2.384050253 | 1.253414647  | 1.15E-32 | 4.05E-31 | 1011.22163 | 966.585346 | 987.409734 | 2198.461273 | 2333.461815 | 2538.030815 | HR            |
| ENSMUSG00000078716  | 2.988411122 | 1.579378636  | 1.28E-32 | 4.53E-31 | 226.406258 | 203.491652 | 230.436902 | 664.8196595 | 662.3139606 | 644.2065344 | Tmem8b        |
| ENSMUSG00000001630  | 2.580088903 | 1.367420778  | 1.34E-32 | 4.71E-31 | 1591.10801 | 1336.39229 | 1361.55997 | 3592.30436  | 3885.973535 | 3592.651021 | Stk38l        |
| ENSMUSG00000016494  | 0.391298731 | -1.353657662 | 1.58E-32 | 5.54E-31 | 7598.48038 | 7102.64131 | 6851.16164 | 3121.131548 | 2588.657529 | 2725.881849 | Cd3a          |
| ENSMUSG00000031885  | 0.38686328  | -1.370104296 | 1.65E-32 | 5.80E-31 | 1480.1421  | 1738.48397 | 1557.30745 | 606.8291596 | 623.9065789 | 616.641437  | Cbfh          |
| ENSMUSG00000050379  | 2.845350095 | 1.508606174  | 2.11E-32 | 7.39E-31 | 544.985815 | 466.661144 | 489.368689 | 1314.106149 | 1519.225322 | 1439.510639 | 6-Sep         |
| ENSMUSG00000020901  | 0.182693039 | -2.452506428 | 2.45E-32 | 8.54E-31 | 399.119332 | 560.580367 | 507.95231  | 84.91466056 | 86.2032457  | 96.98830549 |               |
| ENSMUSG00000020577  | 0.398644816 | -1.477362403 | 2.56E-32 | 8.93E-31 | 1162.45743 | 1224.86321 | 1132.36621 | 467.0306331 | 401.9972622 | 396.1206582 | Tspan13       |
| ENSMUSG00000047592  | 0.052736028 | -4.245067265 | 2.62E-32 | 9.12E-31 | 187.031257 | 215.231555 | 267.604144 | 8.284357128 | 16.21645007 | 10.20929532 | Nxpe5         |
| ENSMUSG00000038025  | 2.165513466 | 1.114709144  | 3.09E-32 | 1.07E-30 | 1208.99152 | 1143.66222 | 1199.26301 | 2636.496656 | 2625.357916 | 2428.791356 | Phf2          |
| ENSMUSG00000004698  | 4.510638744 | 2.173331746  | 3.19E-32 | 1.10E-30 | 240.72444  | 208.383728 | 184.597323 | 907.1371055 | 1122.349044 | 835.1203568 | Hdac9         |
| ENSMUSG000000045763 | 0.060864423 | -4.038257003 | 3.29E-32 | 1.14E-30 | 578.096611 | 861.904544 | 1360.32106 | 74.55921415 | 52.0633969  | 43.8996986  | Basp1         |
| ENSMUSG00000006389  | 95.39593597 | 6.575855901  | 3.33E-32 | 1.15E-30 | 3.57954558 | 5.86995149 | 4.9563229  | 421.4666689 | 234.7117773 | 709.5460244 | Mpl           |
| ENSMUSG00000052560  | 0.253117282 | -1.982122081 | 3.89E-32 | 1.34E-30 | 684.588092 | 663.304519 | 724.761222 | 192.6113032 | 143.3875585 | 189.8928929 | Cpne8         |
| ENSMUSG00000018339  | 0.231636147 | -2.110067689 | 4.01E-32 | 1.38E-30 | 6510.29853 | 8004.65718 | 9540.83107 | 2146.684041 | 1774.421036 | 1650.843052 | Gpx3          |
| ENSMUSG00000018143  | 2.047455733 | 1.033832261  | 4.89E-32 | 1.68E-30 | 1072.96879 | 1077.1361  | 1077.85002 | 2178.785925 | 2155.080664 | 2275.651926 | Mafk          |
| ENSMUSG00000039252  | 0.266123553 | -1.909831895 | 5.34E-32 | 1.83E-30 | 1764.71597 | 1689.5677  | 1879.42355 | 572.6561865 | 402.8507596 | 445.1252757 | Lgl2          |
| ENSMUSG00000045838  | 2.221282336 | 1.151392778  | 5.52E-32 | 1.88E-30 | 1507.88358 | 1314.86913 | 1395.01049 | 3114.91828  | 3088.806989 | 3167.944336 | A430105119Rik |
| ENSMUSG00000024526  | 11.93551445 | 3.577188847  | 5.58E-32 | 1.90E-30 | 102.017049 | 40.113352  | 83.0068409 | 919.5636412 | 763.0266505 | 1005.615589 | Idea          |
| ENSMUSG00000064080  | 0.293935406 | -1.766428945 | 6.18E-32 | 2.10E-30 | 8360.02871 | 7463.64332 | 6376.65985 | 2472.880603 | 2002.304835 | 2052.068350 | Fbln2         |
| ENSMUSG00000024371  | 0.181268912 | -2.455859583 | 8.33E-32 | 2.83E-30 | 1647.48585 | 1347.15387 | 1366.5156  | 321.0188387 | 193.7439034 | 281.7765507 | C2            |
| ENSMUSG00000023993  | 25.1797449  | 4.654191762  | 8.68E-32 | 2.94E-30 | 10.7386367 | 6.8482764  | 16.1058049 | 299.2724013 | 195.4508982 | 336.9067454 | Trem1         |
| ENSMUSG00000027318  | 3.147472196 | 1.654193634  | 9.10E-32 | 3.07E-30 | 1065.8097  | 963.65037  | 1289.7033  | 3276.463244 | 3646.99427  | 3513.018518 | Adam33        |
| ENSMUSG00000034947  | 0.195771832 | -2.352754895 | 9.23E-32 | 3.11E-30 | 641.633546 | 887.341001 | 931.70755  | 154.2961515 | 144.2416359 | 179.6835975 | Tmem106a      |
| ENSMUSG00000022548  | 0.188548665 | -2.406991159 | 9.31E-32 | 3.13E-30 | 2139.36656 | 2160.14215 | 1734.4713  | 438.0353832 | 280.8006354 | 430.8322623 | Apod          |
| ENSMUSG00000069793  | 0.085967045 | -3.54007248  | 1.00E-31 | 3.37E-30 | 272.045464 | 378.611971 | 426.184377 | 31.06633923 | 22.19093167 | 39.81625173 | Slnf9         |
| ENSMUSG00000026469  | 3.422719818 | 1.775143199  | 1.10E-31 | 3.69E-30 | 1147.24436 | 959.737069 | 843.696397 | 3044.501245 | 3582.981968 | 3481.369703 | Xpr1          |
| ENSMUSG00000035697  | 0.27029011  | -1.887419371 | 1.35E-31 | 4.51E-30 | 1082.81254 | 1495.85931 | 1248.81934 | 343.8008208 | 334.5709698 | 356.3044065 | Arhgap45      |
| ENSMUSG00000078810  | 212.933747  | 7.1734260769 | 1.45E-31 | 4.84E-30 | 0          | 4.89162624 | 2.47781615 | 508.4524187 | 297.0170854 | 423.8309379 | Gp6           |
| ENSMUSG00000031827  | 0.131965592 | -2.921766282 | 1.75E-31 | 5.84E-30 | 1172.30118 | 2150.3589  | 2228.79562 | 247.4951692 | 233.8582799 | 251.1486648 | Cotl1         |
| ENSMUSG00000047139  | 9.560132763 | 3.257030653  | 2.54E-31 | 8.46E-30 | 638.054    | 1233.66814 | 728.477947 | 8292.641485 | 10432.29838 | 6135.786484 | Cd24a         |
| ENSMUSG00000020676  | 0.235657707 | -2.085235233 | 2.82E-31 | 9.38E-30 | 711.434684 | 863.861195 | 847.413122 | 223.6776425 | 161.3110033 | 186.8301043 | Ccl11         |
| ENSMUSG00000034255  | 0.216795084 | -2.205596053 | 4.23E-31 | 1.40E-29 | 481.448881 | 474.487746 | 341.140009 | 99.41228554 | 117.7826373 | 82.69529205 | Arhgap27      |
| ENSMUSG00000038893  | 3.517340303 | 1.814484923  | 4.59E-31 | 1.52E-29 | 71.4178993 | 358.067041 | 335.744088 | 1336.888132 | 1214.526766 | 1449.719935 | Fam117a       |
| ENSMUSG00000020646  | 8.806566869 | 3.138579712  | 5.54E-31 | 1.83E-29 | 74.2755708 | 53.8078887 | 49.5563229 | 666.8907488 | 406.2647491 | 501.2764    | Mboat2        |
| ENSMUSG00000024030  | 0.155448203 | -2.685494159 | 5.84E-31 | 1.93E-29 | 630.000022 | 831.576461 | 693.788521 | 138.7629819 | 81.08225034 | 116.3859666 | Abcg1         |
| ENSMUSG00000021196  | 2.672402841 | 1.418137498  | 6.80E-31 | 2.24E-29 | 1975.01427 | 1619.12829 | 1575.89107 | 4559.503054 | 4641.317039 | 4623.789848 | HR            |
| ENSMUSG00000036002  | 2.248735139 | 1.169113748  | 7.00E-31 | 2.30E-29 | 871.619349 | 864.83952  | 854.84657  | 1847.41164  | 1907.566626 | 2073.507879 | Fam214b       |
| ENSMUSG00000057337  | 4.476903793 | 2.162501316  | 7.12E-31 | 2.33E-29 | 392.855128 | 290.562599 | 262.648511 | 1516.037354 | 1473.136464 | 1256.764253 | Chst3         |
| ENSMUSG00000005413  | 0.106500682 | -3.23106542  | 7.75E-31 | 2.53E-29 | 725.752867 | 1220.94991 | 1563.50199 | 114.9454552 | 128.8781032 | 129.6580505 | Hmxo1         |
| ENSMUSG00000037855  | 3.128230259 | 1.645346709  | 8.17E-31 | 2.67E-29 | 176.29262  | 174.141894 | 162.296958 | 535.3765794 | 557.3337839 | 513.5275544 | Zfp365        |
| ENSMUSG00000043832  | 0.115605175 | -2.137222109 | 9.68E-31 | 3.15E-29 | 402.698878 | 514.599081 | 325.832823 | 39.35069636 | 58.8913867  | 44.92089939 | Clec4a3       |
| ENSMUSG00000026854  | 2.535682675 | 1.340601163  | 1.19E-30 | 3.86E-29 | 506.5057   | 516.555731 | 564.942081 | 1271.648819 | 1316.946445 | 1428.280415 | Usp20         |
| ENSMUSG00000055172  | 0.328978068 | -1.603936689 | 1.24E-30 | 4.03E-29 | 3516.00865 | 3094.44276 | 3297.97329 | 1221.942676 | 96.8298184  | 1112.813189 | C1ra          |
| ENSMUSG00000029516  | 0.253144136 | -1.981969032 | 1.35E-30 | 4.38E-29 | 389.275582 | 362.958667 | 364.238973 | 85.9502052  | 95.59170566 | 101.0720236 | Cit           |
| ENSMUSG00000001435  | 2.889329693 | 1.530734835  | 2.01E-30 | 6.51E-29 | 13083.2391 | 11030.6172 | 9739.05636 | 33724.58232 | 32147.83201 | 31951.01062 | Col18a1       |
| ENSMUSG00000058013  | 0.397775225 | -1.329974672 | 2.06E-30 | 6.64E-29 | 2264.06258 | 2376.35203 | 2646.30763 | 940.274534  | 923.4841565 | 1034.201615 | 11-Sep        |
| ENSMUSG00000079243  | 3.744808945 | 1.904892116  | 2.10E-30 | 6.77E-29 | 651.477296 | 969.520321 | 817.679328 | 3217.4372   | 2889.088604 | 3022.972343 |               |
| ENSMUSG00000056214  | 0.336137944 | -1.572874687 | 2.11E-30 | 6.79E-29 | 608.522749 | 571.341945 | 569.897713 | 207.1089282 | 186.9159245 | 194.9975405 | Pard6g        |
| ENSMUSG00000028479  | 2.541468594 | 1.345662403  | 2.58E-30 | 8.26E-29 | 617.627862 | 511.664105 | 537.686104 | 1407.305167 | 1433.022088 | 1374.171149 | Gne           |
| ENSMUSG00000097252  | 14.04228667 | 3.81170598   | 2.61E-30 | 8.37E-29 | 52.7982973 | 38.1546847 | 70.6177601 | 669.9973827 | 513.8054179 | 1072.996938 | Gm6634        |
| ENSMUSG00000047953  | 35.35300763 | 5.143883458  | 2.63E-30 | 8.42E-29 | 7.15909116 | 7.82660199 | 8.67235651 | 304.4501245 | 168.        |             |               |

|                     |             |              |          |          |              |            |             |             |             |             |               |
|---------------------|-------------|--------------|----------|----------|--------------|------------|-------------|-------------|-------------|-------------|---------------|
| ENSMUSG00000041378  | 0.357927236 | -1.482261766 | 3.46E-29 | 1.05E-27 | 2618.43759   | 2935.95407 | 3290.53984  | 983.767409  | 1044.680783 | 1136.294569 | Cldn5         |
| ENSMUSG00000037712  | 2.076978837 | 1.054486516  | 3.53E-29 | 1.07E-27 | 3637.7132    | 3519.03592 | 3203.81628  | 7049.987916 | 7434.815607 | 7040.330049 | Fermf2        |
| ENSMUSG00000078771  | 0.090544368 | -3.465231276 | 3.64E-29 | 1.10E-27 | 437.599447   | 726.89566  | 683.877256  | 77.66584808 | 52.06333969 | 37.77439267 | Evi2a         |
| ENSMUSG00000035373  | 0.029933533 | -5.062103255 | 3.99E-29 | 1.21E-27 | 309.630693   | 728.85231  | 1195.546291 | 25.88861603 | 19.63043956 | 12.43952016 | Ccl7          |
| ENSMUSG00000006576  | 2.493294533 | 1.318053318  | 4.29E-29 | 1.30E-27 | 1530.25574   | 1593.69183 | 1780.3109   | 4228.128769 | 3703.325097 | 4290.966821 | Slc4a3        |
| ENSMUSG00000073599  | 0.380673578 | -1.393373656 | 5.09E-29 | 1.54E-27 | 1014.80117   | 1160.29374 | 1049.35514  | 432.8576599 | 408.825412  | 385.9113629 | Eccsr         |
| ENSMUSG00000020218  | 22.26422293 | 4.476655354  | 5.15E-29 | 1.55E-27 | 10.7386367   | 9.78325249 | 34.689426   | 355.1918119 | 427.6021834 | 405.309024  | Wif1          |
| ENSMUSG00000046598  | 2.583408858 | 1.369275987  | 5.35E-29 | 1.61E-27 | 347.215921   | 357.088716 | 324.593915  | 941.3100787 | 856.9113615 | 863.7063837 | Bdh1          |
| ENSMUSG00000002985  | 0.176918822 | -2.49884055  | 5.60E-29 | 1.68E-27 | 39033.1548   | 36377.0677 | 46462.7694  | 8220.15336  | 4843.597586 | 8499.23835  | ApoE          |
| ENSMUSG00000054196  | 0.043077203 | -4.536931609 | 5.67E-29 | 1.70E-27 | 910.994351   | 531.23061  | 1766.68291  | 56.95495526 | 43.52836597 | 37.77439267 | Chtrc1        |
| ENSMUSG00000025044  | 0.091523781 | -3.44970954  | 5.72E-29 | 1.71E-27 | 264.886373   | 446.116313 | 411.31748   | 28.99524995 | 29.01891065 | 44.92089939 | Msr1          |
| ENSMUSG00000045392  | 5.374397343 | 2.426102987  | 7.25E-29 | 2.17E-27 | 750.809686   | 559.602042 | 732.194671  | 4493.228197 | 3799.7703   | 2683.002809 | Olfr1033      |
| ENSMUSG00000031722  | 0.114459378 | -3.127092417 | 7.78E-29 | 2.32E-27 | 10905.0856   | 5338.72088 | 10950.7085  | 1210.551685 | 813.3829955 | 1089.33181  | Hp            |
| ENSMUSG00000046470  | 0.309302476 | -1.692909712 | 7.96E-29 | 2.37E-27 | 1260.00004   | 1566.29872 | 1556.06854  | 503.2746955 | 439.5511466 | 412.4555307 | Sox18         |
| ENSMUSG00000037902  | 0.163224972 | -2.615066305 | 8.78E-29 | 2.61E-27 | 2600.53987   | 4269.41139 | 5082.00091  | 650.3220346 | 642.6835211 | 657.4786183 | Sirpa         |
| ENSMUSG00000024451  | 0.326920989 | -1.612986092 | 9.06E-29 | 2.69E-27 | 1799.61654   | 1647.49972 | 1433.41664  | 586.1182668 | 526.607885  | 483.9205979 | Arap3         |
| ENSMUSG00000024397  | 0.041462092 | -4.592063281 | 9.19E-29 | 2.72E-27 | 330.21308    | 887.341001 | 865.996743  | 18.63980354 | 36.70038699 | 30.62788595 | Aif1          |
| ENSMUSG00000028005  | 4.728277361 | 2.241314667  | 1.08E-28 | 3.21E-27 | 1278.79266   | 914.734107 | 748.300476  | 4478.730572 | 4997.227113 | 4447.169039 | Gucy1b1       |
| ENSMUSG00000037887  | 3.21019327  | 1.682660158  | 1.14E-28 | 3.35E-27 | 514.559677   | 544.927163 | 641.754382  | 1773.88797  | 1627.619488 | 2053.089288 | Dusp1         |
| ENSMUSG00000033427  | 11.70619976 | 3.549200898  | 1.16E-28 | 3.41E-27 | 17.8977279   | 33.2630585 | 26.0170695  | 236.1041782 | 291.8961012 | 371.6183495 | Upb1          |
| ENSMUSG00000074039  | 4.827804081 | 2.271367131  | 1.19E-28 | 3.51E-27 | 123.494323   | 91.9625734 | 80.5290247  | 468.0661777 | 459.1815861 | 511.4856953 | 4930520004Rik |
| ENSMUSG00000052632  | 3.741999544 | 1.903809383  | 1.27E-28 | 3.74E-27 | 820.610825   | 659.391218 | 553.791908  | 2299.944648 | 2685.102732 | 2636.04005  | Asp2          |
| ENSMUSG00000036353  | 11.72810679 | 3.55189824   | 1.32E-28 | 3.88E-27 | 105.596595   | 129.138933 | 97.8737377  | 996.1939447 | 897.0257379 | 2012.252107 | P2ry12        |
| ENSMUSG00000044943  | 68.94768569 | 6.107430222  | 1.38E-28 | 4.04E-27 | 4.74443198   | 4.89162624 | 1.23890807  | 280.6325977 | 166.4319875 | 317.590843  | Pls1          |
| ENSMUSG00000074766  | 0.252083348 | -1.988027274 | 1.38E-28 | 4.04E-27 | 638.948886   | 573.298596 | 635.559841  | 188.4691247 | 138.2665743 | 139.8673458 | Ism1          |
| ENSMUSG00000038227  | 0.350278955 | -1.513423784 | 1.46E-28 | 4.27E-27 | 836.71878    | 805.16168  | 795.378983  | 306.5212137 | 251.7817247 | 297.0904937 | Hoxa9         |
| ENSMUSG00000002111  | 0.139748688 | -2.839093356 | 1.48E-28 | 4.30E-27 | 544.090928   | 981.260224 | 865.996743  | 126.3364462 | 99.85919252 | 108.2185303 | Sp1           |
| ENSMUSG00000036594  | 0.096534678 | -3.372808892 | 1.55E-28 | 4.52E-27 | 7502.72754   | 15723.6434 | 10477.4456  | 1095.60623  | 1426.194109 | 730.9855446 | H2-A          |
| ENSMUSG00000021904  | 0.381567319 | -1.389990485 | 1.57E-28 | 4.56E-27 | 1960.69609   | 2065.2446  | 2159.24946  | 792.1916504 | 744.2497084 | 671.7716317 | Sema3g        |
| ENSMUSG00000031342  | 0.224675066 | -2.154088069 | 1.71E-28 | 4.94E-27 | 1431.81823   | 1207.25336 | 1663.85353  | 381.0804279 | 262.8771906 | 323.6346615 | Gpm6b         |
| ENSMUSG00000022283  | 3.198655638 | 1.677465683  | 1.85E-28 | 5.35E-27 | 9009.71623   | 10651.027  | 12906.9443  | 33146.74841 | 34571.76455 | 36442.07963 | Pabpc1        |
| ENSMUSG00000030214  | 0.125735286 | -2.991538513 | 1.86E-28 | 5.37E-27 | 638.948886   | 1094.74595 | 646.710014  | 111.8388212 | 81.93574771 | 106.1766713 | Plbd1         |
| ENSMUSG00000008136  | 0.333260346 | -1.58527843  | 2.37E-28 | 6.80E-27 | 836.71878    | 786.5735   | 879.624732  | 306.5212137 | 245.8072431 | 282.7974802 | Fhl2          |
| ENSMUSG00000031870  | 16.30057417 | 0.026850877  | 2.40E-28 | 6.88E-27 | 12.5284095   | 29.3497575 | 28.4948857  | 357.2629012 | 495.0284757 | 280.7556212 | Pgr           |
| ENSMUSG00000034957  | 0.238766117 | -2.066329973 | 2.49E-28 | 7.12E-27 | 3039.92909   | 2316.67419 | 3068.7753   | 796.3338289 | 548.7988102 | 667.6879136 | Cebpa         |
| ENSMUSG00000037921  | 0.131787485 | -2.923714723 | 2.57E-28 | 7.35E-27 | 318.579557   | 448.072964 | 325.832823  | 40.386241   | 42.6748686  | 61.25577189 | Dxk60         |
| ENSMUSG00000023022  | 0.423995504 | -1.237880706 | 2.74E-28 | 7.84E-27 | 4029.67344   | 3661.87141 | 3585.39996  | 1728.324006 | 1473.988961 | 1581.419844 | Lima1         |
| ENSMUSG00000035274  | 0.121189193 | -3.044667048 | 3.71E-28 | 1.06E-26 | 189.715916   | 198.600025 | 242.825982  | 24.85307138 | 22.19093167 | 29.60695641 | Tpbp          |
| ENSMUSG00000031129  | 0.210990504 | -2.244750029 | 3.78E-28 | 1.07E-26 | 320.36933    | 303.280827 | 387.778227  | 70.41703559 | 68.27978976 | 74.5278558  | Slc9a9        |
| ENSMUSG00000022661  | 2.594100944 | 1.37523462   | 3.91E-28 | 1.11E-26 | 3413.09671   | 3270.54131 | 2767.72063  | 7587.435585 | 8796.997413 | 8140.892084 | Cd200         |
| ENSMUSG00000027559  | 0.154875419 | -2.690819907 | 3.94E-28 | 1.12E-26 | 39495.8111   | 26918.6192 | 34460.228   | 7191.857532 | 4000.342182 | 4431.855096 | Car3          |
| ENSMUSG00000032816  | 0.267270338 | -1.928400205 | 4.47E-28 | 1.26E-26 | 404.284107   | 418.723206 | 416.273112  | 113.9099105 | 125.4641137 | 94.94644643 | Igdc4         |
| ENSMUSG00000031740  | 0.136766962 | -2.870208328 | 4.82E-28 | 1.36E-26 | 19264.2194   | 9795.97071 | 13640.3779  | 2278.19821  | 1473.989961 | 2088.821822 | Mmp2          |
| ENSMUSG00000028883  | 3.770257298 | 1.914662982  | 5.04E-28 | 1.42E-26 | 136.022732   | 154.575389 | 133.802072  | 573.6917311 | 565.0152602 | 462.4810778 | Sema3a        |
| ENSMUSG00000035208  | 0.144392017 | -2.791920107 | 5.05E-28 | 1.42E-26 | 440.284107   | 631.998111 | 621.931852  | 57.9904999  | 93.0312354  | 92.90457737 | Slfm8         |
| ENSMUSG00000006344  | 0.154292741 | -2.696257907 | 7.17E-28 | 2.01E-26 | 633.579568   | 754.288767 | 1043.1606   | 144.9762497 | 99.85919252 | 130.67898   | Ggt5          |
| ENSMUSG00000037336  | 0.277667266 | 3.282093882  | 8.02E-28 | 2.25E-26 | 40.2698878   | 53.807887  | 54.5119552  | 468.0661777 | 333.7174724 | 639.1018867 | Mfsd2b        |
| ENSMUSG00000002020  | 2.822663711 | -1.822841414 | 8.62E-28 | 2.41E-26 | 5337.10246   | 4225.38675 | 3693.18496  | 1374.167739 | 1189.775337 | 1184.278257 | Ltb2p         |
| ENSMUSG00000058794  | 10.67537897 | 3.41621538   | 1.07E-27 | 2.99E-26 | 23.2670463   | 41.089604  | 24.7781651  | 328.2676512 | 245.8072431 | 380.8067153 | Nfe2          |
| ENSMUSG00000001493  | 0.183739682 | -2.443818944 | 1.12E-27 | 3.11E-26 | 361.534104   | 359.045366 | 491.846505  | 82.84357128 | 66.57279501 | 73.50692627 | Meox1         |
| ENSMUSG00000030786  | 0.065869665 | -3.924241985 | 1.13E-27 | 3.14E-26 | 446.548311   | 1171.05532 | 944.047951  | 65.23931238 | 61.45181078 | 41.85811079 | Itgam         |
| ENSMUSG00000053063  | 0.081667534 | -3.614093525 | 1.21E-27 | 3.37E-26 | 426.860811   | 903.97253  | 678.921632  | 72.48812487 | 40.11437648 | 52.06740611 | Clec12a       |
| ENSMUSG00000003644  | 0.127779485 | -2.232569033 | 1.27E-27 | 3.52E-26 | 365.113649   | 454.921241 | 423.706561  | 104.5900087 | 75.96126611 | 84.73715112 | Rps6ka1       |
| ENSMUSG000000004085 | 2.017045367 | 1.012243533  | 1.29E-27 | 3.57E-26 | 2575.48305   | 2804.85849 | 2585.60115  | 5457.320258 | 5335.783955 | 5075.040701 | Map3k20       |
| ENSMUSG00000025477  | 2.691486632 | 1.42840326   | 1.31E-27 | 3.62E-26 | 2011.70462   | 2244.27812 | 2654.98     | 6308.199076 | 5848.14248  | 6297.09335  | Inpp5a        |
| ENSMUSG00000060477  | 2.476952719 | 1.30856633   | 1.32E-27 | 3.66E-26 | 652.372182   | 781.681874 | 765.645189  | 1776.994604 | 1769.300052 | 1897.907999 | Irak2         |
| ENSMUSG00000024206  | 3.110527579 | 1.637159298  | 1.40E-27 | 3.86E-26 | 257.727282   | 229.906433 | 299.815754  | 776.6584808 | 806.5550165 | 859.6226655 | Rfx2          |
| ENSMUSG00000028373  | 6.070328115 | 2.6017745    | 1.46E-27 | 4.03E-26 | 112.755686   | 60.6561654 | 84.2457480  | 541.5898473 | 538.5568471 | 488.0043161 | Astn2         |
| ENSMUSG00000019929  | 0.234804055 | -2.090467729 | 1.57E-27 | 4.33E-26 | 58981.9623   | 55157.6056 | 74574.8325  | 16573.89198 | 11567.44988 | 15231.24768 | Dcn           |
| ENSMUSG00000019942  | 0.118461089 | -3.077514843 | 1.62E-27 | 4.44E-26 | 186.13637    | 251.429589 | 246.542706  | 32.10188387 | 26.45841853 | 22.46044969 | Cdk1          |
| ENSMUSG00000051439  | 0.118827883 | -3.073054686 | 1.62E-27 | 4.44E-26 | 485.028426   | 838.424738 | 593.436967  | 93.19901769 | 79.37525559 | 55.1301947  | Cd14          |
| ENSMUSG00000039062  | 0.274411673 | -1.865586245 | 1.66E-27 | 4.53E-26 | 2935.22738   | 2596.47521 | 2419.58747  | 839.8267039 | 579.5247512 | 764.6762191 | Anep          |
| ENSMUSG00000032011  | 0.196801073 | -2.345190006 | 1.66E-27 | 4.55E-26 | 2864.53135   | 2959.43388 | 4157.77549  | 805.6537307 | 522.3403916 | 637.0600277 | Thy1          |
| ENSMUSG00000024885  | 0.204779578 | -2.28785625  | 1.69E-27 | 4.60E-26 | 315.000011   | 403.070002 | 408.839664  | 67.31040167 | 80.22875297 | 82.69529205 | Aldh3b1       |
| ENSMUSG00000089809  | 0.13239878  | -3.019769568 | 1.76E-27 | 4.79E-26 | 201.349439   | 245.559637 | 261.409603  | 37.27960708 | 23.89792642 | 26.54416782 | Rasgef1b      |
| ENSMUSG00000040950  | 0.16572082  | -2.593173227 | 1.78E-27 | 4.84E-26 | 664.005705   | 717.112407 | 441.747998  | 95.27010697 | 115.2221452 | 91.88365784 | Mgl2          |
| ENSMUSG00000021091  | 0.102645397 | -3.284259159 | 1.86E-27 | 5.03E-26 | 4529.02005   | 3101.29104 | 2740.46466  | 401.7913207 | 206.546364  | 457.3764301 | Serpina3n     |
| ENSMUSG00000062209  | 12.50770034 | 3.644744656  | 2.40E-27 | 6.49E-26 | 9.84375035</ |            |             |             |             |             |               |

|                    |              |              |          |          |            |            |             |             |              |             |               |
|--------------------|--------------|--------------|----------|----------|------------|------------|-------------|-------------|--------------|-------------|---------------|
| ENSMUSG00000027495 | 2.778802321  | 1.474463207  | 2.85E-26 | 7.39E-25 | 321.264216 | 319.912356 | 315.921559  | 804.6181861 | 865.4463352  | 990.3016456 | Fam210b       |
| ENSMUSG00000067586 | 2.02567533   | 1.018402961  | 2.87E-26 | 7.45E-25 | 1645.69608 | 1743.37559 | 1665.09245  | 3647.188226 | 3309.862808  | 3282.288444 | S1pr3         |
| ENSMUSG00000022037 | 2.734688445  | 1.451376481  | 3.29E-26 | 8.51E-25 | 6052.11669 | 5319.15438 | 4427.875745 | 14316.40466 | 14187.68681  | 14712.61548 | Clu           |
| ENSMUSG00000071715 | 2.834187955  | 2.897672917  | 3.33E-26 | 8.62E-25 | 308.039781 | 384.481823 | 327.071731  | 40.386241   | 38.7958283   | 38.7953222  | Ncf4          |
| ENSMUSG00000065445 | 4.51049722   | 2.173286479  | 3.86E-26 | 9.97E-25 | 115.404345 | 93.9192329 | 76.8123005  | 450.4619188 | 456.621094   | 392.0369401 | Mir143        |
| ENSMUSG00000041390 | 0.334428692  | 1.800229468  | 3.89E-26 | 1.00E-24 | 1335.1705  | 1538.90562 | 1793.93889  | 512.5945973 | 503.5634495  | 544.1554403 | Mdfic         |
| ENSMUSG00000021423 | 0.0750539    | 3.735929143  | 4.15E-26 | 1.07E-24 | 549.460247 | 1233.66814 | 1169.52922  | 82.84357128 | 91.3242188   | 46.96275845 | Ly86          |
| ENSMUSG00000040966 | 9.470626882  | 3.243459924  | 4.53E-26 | 1.16E-24 | 16.1079551 | 16.6315292 | 18.5836211  | 177.0781336 | 148.5085427  | 158.2440774 | Sic22a2       |
| ENSMUSG00000021838 | 2.653780795  | 1.408049207  | 4.54E-26 | 1.16E-24 | 1308.32391 | 1501.72926 | 1657.659    | 4155.640644 | 4103.615364  | 3588.567303 | Samd4         |
| ENSMUSG00000057880 | 3.498798302  | 1.806859499  | 4.78E-26 | 1.22E-24 | 445.653425 | 320.890682 | 343.177536  | 1210.551685 | 1242.692174  | 1435.426921 | Abat          |
| ENSMUSG00000033880 | 0.205854341  | -2.28030422  | 5.39E-26 | 1.38E-24 | 1522.20176 | 2121.00914 | 1573.41325  | 381.0804279 | 271.4121643  | 422.6648261 | Lgals3bp      |
| ENSMUSG00000024072 | 2.548420055  | 1.349603096  | 5.62E-26 | 1.44E-24 | 1133.82106 | 1070.28782 | 1325.63164  | 2772.153004 | 3168.182245  | 3046.453722 | Vipf4         |
| ENSMUSG00000026980 | 3.569796151  | 1.835841693  | 5.87E-26 | 1.50E-24 | 106.491481 | 121.312331 | 106.546094  | 390.4003297 | 432.7231676  | 370.5974199 | Ly75          |
| ENSMUSG00000048572 | 2.145902233  | 1.101584349  | 7.22E-26 | 1.84E-24 | 1015.69606 | 1191.60015 | 1100.15037  | 2376.574951 | 2348.824768  | 2370.598372 | Temem252      |
| ENSMUSG00000099398 | 0.019878392  | -5.652655147 | 8.04E-26 | 2.04E-24 | 212.088076 | 180.990171 | 144.952244  | 7.248812487 | 0.853497347  | 3.062788595 | Ms4a14        |
| ENSMUSG00000074923 | 18.91682872  | 4.241598346  | 8.49E-26 | 2.15E-24 | 8.05397756 | 5.86995149 | 9.91126458  | 137.7274373 | 134.8525884  | 172.5370908 | Pak6          |
| ENSMUSG00000027381 | 0.278279789  | 1.845391962  | 8.70E-26 | 2.20E-24 | 502.926154 | 426.549808 | 454.679263  | 110.8032766 | 139.1200716  | 134.7626982 | Bcl2l11       |
| ENSMUSG00000038168 | 5.001887124  | 2.322472501  | 9.04E-26 | 2.29E-24 | 287.258533 | 208.383278 | 156.102417  | 1124.60148  | 1100.158112  | 1048.494629 | P3h2          |
| ENSMUSG00000032875 | 3.331110646  | 1.736003275  | 9.50E-26 | 2.40E-24 | 2549.53134 | 1998.71848 | 1682.43716  | 6969.215434 | 7002.945937  | 6794.286032 | Arhgef17      |
| ENSMUSG00000025610 | 2.182430746  | 1.125935874  | 1.02E-25 | 2.56E-24 | 1421.97448 | 1544.77557 | 1635.35866  | 3463.896824 | 3447.275885  | 3126.086226 | Map3k7c1      |
| ENSMUSG00000020312 | 0.237051283  | -2.076728893 | 1.19E-25 | 2.99E-24 | 762.443209 | 637.868062 | 847.413122  | 215.3932853 | 153.629527   | 164.3696546 | Shc2          |
| ENSMUSG00000030774 | 0.195193804  | -2.357020834 | 1.25E-25 | 3.14E-24 | 427.755697 | 660.369543 | 504.235586  | 98.3767409  | 97.2987004   | 115.3650371 | Pak1          |
| ENSMUSG00000025473 | 0.114843447  | -3.122259561 | 1.28E-25 | 3.21E-24 | 135.000011 | 535.143911 | 334.50518   | 50.74168741 | 35.84688962  | 50.02554704 | Adam8         |
| ENSMUSG00000036144 | 0.304638053  | -1.714831932 | 1.42E-25 | 3.56E-24 | 1770.98018 | 1381.39525 | 1370.23233  | 487.7415259 | 403.7041529  | 488.0043161 | Meox2         |
| ENSMUSG00000044583 | 0.182205801  | -2.456359203 | 1.66E-25 | 4.15E-24 | 263.991487 | 331.652259 | 277.515408  | 56.95495526 | 42.6748686   | 60.23484236 | Tlr7          |
| ENSMUSG00000026090 | 7.961615734  | 2.993061242  | 1.83E-25 | 4.55E-24 | 35.7954558 | 21.5231555 | 47.0785068  | 294.094678  | 259.4632011  | 268.5044668 | 2010300C2Rik  |
| ENSN30000019122    | 0.099303167  | -3.332016462 | 1.90E-25 | 4.74E-24 | 1024.64492 | 2479.07618 | 2262.24614  | 224.7131871 | 194.5974008  | 153.1394297 | Ccl9          |
| ENSMUSG00000043857 | 13.98767218  | 3.806083985  | 2.11E-25 | 5.24E-24 | 8.94886395 | 11.739903  | 12.3890807  | 153.2606069 | 130.5850979  | 174.5789499 | Mgat5b        |
| ENSMUSG00000052609 | 3.017393819  | 1.593303004  | 2.16E-25 | 5.37E-24 | 1975.01427 | 1502.70758 | 1440.85009  | 4857.739911 | 4711.305493  | 5281.268467 | Plekhhg3      |
| ENSMUSG00000038695 | 2.216897001  | 1.148541743  | 2.20E-25 | 5.46E-24 | 695.326729 | 719.069058 | 810.24588   | 1609.236372 | 1636.154462  | 1679.429079 | Josd2         |
| ENSMUSG00000026288 | 0.225877745  | -2.146387848 | 2.23E-25 | 5.53E-24 | 170.539798 | 1001.80505 | 986.170826  | 198.8245711 | 173.2599665  | 237.8765808 | Imp5d         |
| ENSMUSG00000035345 | 0.041348922  | -4.596006459 | 2.88E-25 | 7.12E-24 | 182.556825 | 367.850293 | 550.95184   | 17.6042589  | 13.65595795  | 14.29301344 | Ccl2          |
| ENSMUSG00000001131 | 0.112178281  | -3.156134709 | 2.90E-25 | 7.16E-24 | 1225.09948 | 1686.63273 | 2973.73937  | 244.3885353 | 207.3998614  | 208.2696244 | Timp1         |
| ENSMUSG00000015316 | 42.43417192  | 5.407154619  | 3.07E-25 | 7.57E-24 | 7.15909116 | 5.86995149 | 12.3890807  | 239.2108121 | 220.202322   | 598.2647055 | Slamf1        |
| ENSMUSG00000075602 | 0.256507716  | -1.962925872 | 3.10E-25 | 7.62E-24 | 5909.82976 | 9766.62096 | 8243.69432  | 2120.795425 | 1980.113903  | 2034.712556 | Ly5a          |
| ENSMUSG00000074918 | 3.309481564  | 1.726605234  | 3.19E-25 | 7.84E-24 | 598.678999 | 579.168547 | 791.662258  | 2113.546612 | 1980.9674    | 2414.498342 | Infm2         |
| ENSMUSG00000029648 | 0.429698653  | -1.218602842 | 3.28E-25 | 8.04E-24 | 2371.44895 | 2406.68011 | 2755.33155  | 1158.774453 | 1051.508762  | 1026.034179 | Itat1         |
| ENSMUSG00000034575 | 2.133945789  | 1.093523526  | 4.33E-25 | 1.06E-23 | 639.843773 | 605.583329 | 649.18783   | 1406.269623 | 1351.939837  | 1283.308421 | Papd7         |
| ENSMUSG00000031983 | 2.466227932  | 1.302306142  | 4.43E-25 | 1.09E-23 | 2212.15917 | 2403.74516 | 2786.30426  | 5685.140079 | 6132.378618  | 6428.79326  | 2310022B05Rik |
| ENSMUSG00000021322 | 0.090921437  | -3.459113439 | 4.66E-25 | 1.14E-23 | 151.235801 | 221.101506 | 188.310544  | 20.71089282 | 17.92344481  | 12.25115438 | Aoah          |
| ENSMUSG00000027316 | 3.470216469  | 1.795025666  | 4.98E-25 | 1.21E-23 | 105.596595 | 114.460544 | 138.757704  | 414.2178564 | 416.5067175  | 407.3508831 | Gfr4          |
| ENSMUSG00000032744 | 2.959040327  | 1.565130326  | 5.00E-25 | 1.22E-23 | 1601.84665 | 1318.78244 | 1836.06174  | 4432.131064 | 4555.115474  | 5081.166278 | Heyl          |
| ENSMUSG00000024737 | 0.089249849  | -3.486006469 | 5.10E-25 | 1.24E-23 | 234.460236 | 460.791192 | 364.238973  | 36.24406244 | 23.04442904  | 35.7325336  | Sic15a3       |
| ENSMUSG00000043801 | 5.663177752  | 2.501611813  | 5.52E-25 | 1.34E-23 | 35.7954558 | 40.1113352 | 42.1228745  | 217.4643746 | 247.5142379  | 200.1021882 | Oaz1-ps       |
| ENSMUSG00000016382 | 3.207894629  | 1.681626754  | 5.53E-25 | 1.34E-23 | 10718.9492 | 8329.46117 | 7319.46889  | 28533.39704 | 29973.97421  | 26087.81232 | Pls3          |
| ENSMUSG00000063856 | 3.411448667  | 1.770384508  | 6.11E-25 | 1.48E-23 | 5772.91214 | 8194.45228 | 8778.9026   | 26673.55886 | 26440.49509  | 24473.72273 | Gpx1          |
| ENSMUSG00000030748 | 0.269763181  | -1.890234641 | 6.26E-25 | 1.51E-23 | 1261.78982 | 1818.70664 | 1893.05153  | 450.4619188 | 451.5001908  | 438.9996986 | Il4ra         |
| ENSMUSG00000071547 | 0.1043603072 | -3.264844254 | 7.06E-25 | 1.70E-23 | 442.073879 | 388.395124 | 486.890873  | 60.06158918 | 23.89792642  | 54.10926517 | Nts5dc2       |
| ENSMUSG00000056481 | 0.326209032  | -1.616131366 | 7.44E-25 | 1.79E-23 | 2329.38929 | 2111.22589 | 2671.0858   | 879.1774002 | 666.5814475  | 774.8855144 | Cd248         |
| ENSMUSG00000047810 | 0.103325518  | -3.274731499 | 7.65E-25 | 1.84E-23 | 334.460236 | 444.159663 | 555.566617  | 42.45733028 | 29.01891065  | 32.84888b   | Cd8b          |
| ENSMUSG00000026749 | 0.369929847  | -1.434676388 | 1.03E-24 | 2.48E-23 | 621.051158 | 665.261169 | 732.194671  | 237.1397228 | 255.1957142  | 253.1905238 | Nek6          |
| ENSMUSG00000029687 | 3.067993291  | 1.617295328  | 1.06E-24 | 2.53E-23 | 367.798309 | 366.871968 | 403.884032  | 1344.136944 | 1149.66096   | 996.4272228 | Ezh2          |
| ENSMUSG00000031749 | 2.051805386  | 1.036892632  | 1.06E-24 | 2.53E-23 | 1583.05403 | 1558.47212 | 1639.07538  | 3327.204932 | 3464.3443833 | 3013.783977 | St3gal2       |
| ENSMUSG00000077113 | 0.191552459  | -2.38418855  | 1.06E-24 | 2.55E-23 | 804.502869 | 1220.94991 | 1137.31761  | 243.3529906 | 157.0435164  | 206.2277654 | Csf2rb        |
| ENSMUSG00000079419 | 0.130937489  | -1.933049882 | 1.18E-24 | 2.82E-23 | 310.525579 | 464.704493 | 275.037592  | 42.45733028 | 52.16837056  | 41.85811079 | Ms4a6c        |
| ENSMUSG00000047344 | 9.664972454  | 3.272765621  | 1.20E-24 | 2.87E-23 | 78.7500028 | 39.1330099 | 30.9727018  | 455.639642  | 487.3469994  | 512.5066248 | Langl3        |
| ENSMUSG00000020399 | 0.05782754   | -4.112099471 | 1.28E-24 | 3.04E-23 | 132.443187 | 196.643375 | 136.279888  | 10.35544641 | 9.388471092  | 7.146506721 | Havcr2        |
| ENSMUSG00000026335 | 2.961966898  | 1.566555518  | 1.29E-24 | 3.08E-23 | 10308.1964 | 7696.48473 | 7387.68084  | 25408.12331 | 25825.97688  | 23985.71841 | Pamc1         |
| ENSMUSG00000034926 | 4.441494809  | 2.151045305  | 1.43E-24 | 3.40E-23 | 200.454553 | 220.123181 | 213.092188  | 883.3195788 | 739.9822215  | 1191.424763 | Thcr24        |
| ENSMUSG00000034881 | 2.859551202  | 1.515839189  | 1.45E-24 | 3.43E-23 | 260.411941 | 314.042403 | 333.266272  | 843.9688824 | 827.0389534  | 918.8365784 | Tbxa2r        |
| ENSMUSG00000029322 | 0.13506456   | -2.888278929 | 1.56E-24 | 3.70E-23 | 623.735818 | 1351.06717 | 1127.40635  | 143.9407051 | 133.14559    | 141.9092049 | Plac8         |
| ENSMUSG00000041362 | 0.245205727  | -2.02793542  | 1.65E-24 | 3.90E-23 | 415.227287 | 517.534057 | 406.361848  | 118.0520891 | 93.88471092  | 117.4068961 | Shn1          |
| ENSMUSG00000040204 | 0.116202345  | -3.105288913 | 1.71E-24 | 4.04E-23 | 191.505689 | 304.251592 | 322.116099  | 31.06633923 | 34.99332925  | 28.58602688 | Pclaf         |
| ENSMUSG00000004035 | 7.034501266  | 2.814448143  | 1.79E-24 | 4.22E-23 | 32.2159102 | 36.1980342 | 56.9897713  | 330.3387405 | 253.4887195  | 286.8811984 | Gstm7         |
| ENSMUSG00000020926 | 4.854260447  | 2.279251516  | 1.81E-24 | 4.28E-23 | 253.25285  | 408.78836  | 183.358395  | 976.5158965 | 871.4208168  | 960.6946892 | Adam11        |
| ENSMUSG00000039316 | 0.330140987  | -1.598845836 | 2.00E-24 | 4.70E-23 | 655.056841 | 755.267092 | 828.829501  | 254.7439817 | 226.1768036  | 258.2951715 | Rfn1          |
| ENSMUSG00000005397 | 0.296939481  | -1.751759167 | 2.06E-24 | 4.85E-23 | 10443.3242 | 7431.35859 | 7862.11063  | 2873.636379 | 2256.647051  | 2513.528507 | Nid1          |
| ENSMUSG00000039997 | 0.174073495  | -2.5222315   |          |          |            |            |             |             |              |             |               |

|                    |             |              |          |          |            |            |             |             |             |             |               |
|--------------------|-------------|--------------|----------|----------|------------|------------|-------------|-------------|-------------|-------------|---------------|
| ENSMUSG00000048915 | 3.259339496 | 1.704579632  | 8.18E-24 | 1.85E-22 | 306.946034 | 363.936992 | 447.245814  | 1224.013766 | 1277.685566 | 1132.21085  | Efna5         |
| ENSMUSG00000027962 | 0.397282089 | -1.331764342 | 8.21E-24 | 1.86E-22 | 2481.51997 | 3087.59448 | 2440.6489   | 1071.788703 | 1058.336741 | 1052.578347 | Vcam1         |
| ENSMUSG00000027490 | 0.208616366 | -2.261075754 | 9.01E-24 | 2.03E-22 | 267.571032 | 353.175415 | 376.628054  | 72.48812487 | 70.84028187 | 64.31856049 | E2f1          |
| ENSMUSG00000040990 | 0.339147346 | -1.560015892 | 9.68E-24 | 2.18E-22 | 993.323899 | 844.29469  | 1074.1333   | 364.5117136 | 310.6730434 | 312.4044366 | Sh3kbp1       |
| ENSMUSG00000022484 | 0.290657539 | -1.782607768 | 1.02E-23 | 2.29E-22 | 619.261386 | 709.285805 | 780.512086  | 219.5354639 | 171.5529718 | 222.5623679 | Hoxc10        |
| ENSMUSG00000022518 | 7.466896093 | 2.900508655  | 1.04E-23 | 2.34E-22 | 41.1647742 | 29.3497575 | 24.7781615  | 197.7890264 | 273.119159  | 248.0858762 | 4930562C15Rik |
| ENSMUSG00000037254 | 6.158018808 | 2.622466274  | 1.04E-23 | 2.34E-22 | 221.931826 | 152.618739 | 107.785002  | 984.8029536 | 865.4463352 | 1134.25271  | Ith2          |
| ENSMUSG00000062591 | 2.628889962 | 1.394453756  | 1.21E-23 | 2.70E-22 | 111.193189 | 230.884759 | 249.020523  | 580.9405436 | 610.250621  | 620.7251552 | Tubb4a        |
| ENSMUSG00000054808 | 2.167550376 | 1.116065523  | 1.33E-23 | 2.98E-22 | 13437.6141 | 12464.842  | 11043.6266  | 28183.38295 | 25729.53178 | 26178.67505 | Actn4         |
| ENSMUSG00000035472 | 28.52904922 | 4.834359762  | 1.37E-23 | 3.07E-22 | 8.05397756 | 5.86995149 | 7.43344844  | 272.3482406 | 217.6182299 | 119.4487552 | Slc25a21      |
| ENSMUSG00000049907 | 2.725034133 | 1.446274301  | 1.42E-23 | 3.18E-22 | 660.42616  | 557.645392 | 759.450649  | 1771.816881 | 1746.255623 | 1864.217325 | Ras11b        |
| ENSMUSG00000021047 | 0.221536818 | -2.174381612 | 1.52E-23 | 3.38E-22 | 335.582398 | 368.828619 | 480.696332  | 82.84357128 | 85.3497372  | 93.9255169  | Novo1         |
| ENSMUSG00000020520 | 0.397488782 | -1.331013952 | 1.55E-23 | 3.44E-22 | 1046.1222  | 856.034593 | 953.959216  | 374.86716   | 379.8063305 | 380.8067153 | Galnt10       |
| ENSMUSG00000022831 | 0.184175984 | -2.440843146 | 1.79E-23 | 3.97E-22 | 743.650595 | 1210.18833 | 1108.82273  | 228.8553657 | 186.0624271 | 149.0557116 | Hcls1         |
| ENSMUSG00000040026 | 0.003222382 | -8.277656868 | 1.79E-23 | 3.97E-22 | 426.860811 | 1725.76574 | 2591.79569  | 5.177723205 | 5.974481604 | 4.083718126 | Saa3          |
| ENSMUSG00000059089 | 0.058377954 | -4.098432549 | 1.83E-23 | 4.06E-22 | 193.295461 | 482.313438 | 488.129781  | 20.71089282 | 18.77694218 | 28.58602688 | Fcgr4         |
| ENSMUSG00000026177 | 0.404751757 | -1.304890752 | 2.06E-23 | 4.56E-22 | 835.823893 | 906.907505 | 787.945534  | 324.1254726 | 335.4244672 | 365.4927723 | Slc11a1       |
| ENSMUSG00000019254 | 2.266833151 | 1.141977558  | 2.29E-23 | 5.06E-22 | 3354.9291  | 3786.11871 | 4185.03147  | 8543.243288 | 8127.855473 | 8315.471034 | Ppp1r12c      |
| ENSMUSG00000028059 | 2.061278195 | 1.043539228  | 2.30E-23 | 5.08E-22 | 3079.30409 | 2792.14026 | 2581.888462 | 5649.931561 | 5819.998579 | 5962.228464 | Arhgef2       |
| ENSMUSG00000028780 | 2.381993941 | 1.252169743  | 2.38E-23 | 5.25E-22 | 1128.45174 | 963.65037  | 1126.16744  | 2602.323683 | 2737.166072 | 2323.635614 | Sema3c        |
| ENSMUSG00000022878 | 0.150968372 | -2.727681759 | 2.40E-23 | 5.29E-22 | 5730.85248 | 3237.27825 | 4249.45469  | 918.5280966 | 527.4613759 | 550.2810175 | Adipoq        |
| ENSMUSG00000037621 | 2.809936548 | 1.490537553  | 2.52E-23 | 5.55E-22 | 425.071038 | 490.14095  | 550.075184  | 1516.037354 | 1314.385953 | 1280.245633 | Atoh8         |
| ENSMUSG00000033446 | 0.386440458 | -1.363491999 | 3.07E-23 | 6.75E-22 | 574.517066 | 551.77544  | 543.880644  | 232.997542  | 205.6928666 | 211.332413  | Lpar6         |
| ENSMUSG00000047180 | 0.180919386 | -2.466581087 | 3.35E-23 | 7.35E-22 | 603.153431 | 1125.07044 | 974.0932319 | 149.1184282 | 170.6994744 | 162.3277955 | Neur3         |
| ENSMUSG00000039242 | 2.474394832 | 1.307075726  | 3.88E-23 | 8.49E-22 | 1102.50004 | 1220.94991 | 939.092319  | 2652.029826 | 2826.783296 | 2600.307517 | B3galnt2      |
| ENSMUSG00000026196 | 4.706979432 | 2.234801549  | 3.97E-23 | 8.67E-22 | 53.6931837 | 51.8512382 | 53.2730471  | 269.2416067 | 264.5841853 | 213.3742721 | Bard1         |
| ENSMUSG00000037731 | 0.130397317 | -2.939013913 | 4.05E-23 | 8.83E-22 | 362.42899  | 717.112407 | 586.003518  | 86.98574985 | 60.2348236  | Themis2     |               |
| ENSMUSG00000051323 | 0.16251381  | -2.621365773 | 4.19E-23 | 9.13E-22 | 689.062524 | 721.025708 | 110.76813   | 163.6160533 | 145.0945532 | 110.2603894 | Pcdh19        |
| ENSMUSG00000004952 | 0.399053502 | -1.32534591  | 4.23E-23 | 9.21E-22 | 1562.47165 | 1952.7372  | 1792.69998  | 737.3077844 | 655.4859817 | 725.8808969 | Rasa4         |
| ENSMUSG00000079017 | 0.178924665 | -2.482575813 | 4.61E-23 | 1.00E-21 | 3672.61377 | 3031.82995 | 5116.69034  | 925.7769091 | 623.9065789 | 565.5946059 | Ilf212a       |
| ENSMUSG00000030223 | 0.113883901 | -3.134364281 | 4.99E-23 | 1.08E-21 | 198.66478  | 307.194128 | 229.197993  | 36.24406244 | 20.48399638 | 27.56509735 | Ptpro         |
| ENSMUSG00000031343 | 2.934192512 | 1.552963529  | 5.05E-23 | 1.10E-21 | 1064.01992 | 765.053044 | 1029.53264  | 2938.875691 | 2824.222680 | 2622.767966 | Gabra3        |
| ENSMUSG00000055541 | 0.092278726 | -3.437858097 | 5.30E-23 | 1.15E-21 | 299.786942 | 586.016824 | 532.730471  | 39.35069636 | 30.72590539 | 61.25577189 | Lair1         |
| ENSMUSG00000036052 | 3.336295458 | 1.738247058  | 6.13E-23 | 1.32E-21 | 800.923324 | 1234.64646 | 961.392664  | 3489.78544  | 3111.851418 | 3396.632551 | Dnajb5        |
| ENSMUSG00000042812 | 9.800181554 | 3.292808476  | 6.77E-23 | 1.46E-21 | 23.2670463 | 33.2630585 | 61.9454036  | 331.3742851 | 380.6598279 | 429.8113328 | Foxf1         |
| ENSMUSG00000030263 | 0.159158959 | -2.65145973  | 6.78E-23 | 1.46E-21 | 268.465919 | 357.088716 | 252.737247  | 52.81277669 | 52.0633969  | 34.71160407 | Lrmp          |
| ENSMUSG00000018659 | 3.761926338 | 1.9114716    | 6.88E-23 | 1.48E-21 | 213.877849 | 285.670973 | 282.471041  | 838.7911592 | 939.7006065 | 1158.755018 | Pnpo          |
| ENSMUSG00000046318 | 0.177050939 | -2.497763597 | 7.23E-23 | 1.55E-21 | 913.67901  | 614.388256 | 703.699785  | 162.5805086 | 93.88471092 | 139.8673458 | Ccbe1         |
| ENSMUSG00000084817 | 4.877133879 | 2.286033575  | 7.34E-23 | 1.58E-21 | 77.8551164 | 132.073909 | 128.44644   | 526.0566776 | 518.9264022 | 600.3065645 | Gm5526        |
| ENSMUSG00000002897 | 0.298991416 | -1.786415483 | 7.85E-23 | 1.68E-21 | 623.735818 | 860.962199 | 847.41312   | 210.2155621 | 231.2977878 | 233.7928627 | Il17ra        |
| ENSMUSG00000033209 | 2.554528254 | 1.353056893  | 8.00E-23 | 1.71E-21 | 2019.75859 | 1799.14013 | 2441.88781  | 5364.12124  | 5272.053267 | 5348.649816 | Ttct8         |
| ENSMUSG00000021281 | 0.179467399 | -2.147206302 | 8.13E-23 | 1.74E-21 | 800.923324 | 1367.6987  | 1216.60773  | 254.7439817 | 177.5274534 | 175.5987994 | Tnfrap2       |
| ENSMUSG00000041836 | 0.19159607  | -2.383860129 | 8.71E-23 | 1.86E-21 | 465.340926 | 723.960684 | 661.576911  | 134.6208033 | 93.03121354 | 127.6161914 | Ptpre         |
| ENSMUSG00000030495 | 0.103748458 | -3.268838201 | 9.12E-23 | 1.94E-21 | 604.943203 | 358.067041 | 449.72363   | 72.48812487 | 41.82137123 | 32.66974501 | Slc7a10       |
| ENSMUSG00000024678 | 0.185843207 | -2.427842138 | 1.04E-22 | 2.22E-21 | 622.840931 | 641.781363 | 670.249267  | 163.6160533 | 82.78924508 | 114.3441075 | Ms4a4d        |
| ENSMUSG00000057596 | 0.19141753  | -2.385205134 | 1.06E-22 | 2.25E-21 | 406.278424 | 686.784325 | 613.259496  | 105.6255534 | 101.5661873 | 119.4487552 | Trim30d       |
| ENSMUSG00000058704 | 3.047504909 | 1.607628545  | 1.14E-22 | 2.43E-21 | 524.403428 | 722.004034 | 730.955763  | 2026.560862 | 2127.768948 | 1864.217325 | Memo1         |
| ENSMUSG00000031803 | 0.308757585 | -1.695453514 | 1.15E-22 | 2.45E-21 | 646.107977 | 793.421777 | 629.365301  | 231.9619996 | 221.0558193 | 185.8091747 | B3gnt3        |
| ENSMUSG00000061780 | 0.137726712 | -2.860119696 | 1.17E-22 | 2.48E-21 | 35901.9473 | 25270.1412 | 41861.4649  | 7014.779398 | 3725.516029 | 3450.741817 | Cfd           |
| ENSMUSG00000058914 | 0.069686846 | -3.842969831 | 1.29E-22 | 2.73E-21 | 2045.7103  | 676.022747 | 2386.13695  | 135.656348  | 110.101161  | 110.2603894 | Cttnf3        |
| ENSMUSG00000021820 | 2.153710885 | 1.106824595  | 1.40E-22 | 2.96E-21 | 2386.66202 | 2691.37276 | 2186.67275  | 5130.088152 | 5136.347185 | 5385.403279 | Camk2g        |
| ENSMUSG00000003812 | 0.275235798 | -1.861259971 | 1.41E-22 | 2.97E-21 | 506.5057   | 680.914373 | 723.522314  | 173.9714997 | 169.845977  | 181.7254566 | Denae2a       |
| ENSMUSG00000039942 | 0.312277175 | -1.679124073 | 1.44E-22 | 3.04E-21 | 378.536945 | 439.268037 | 413.795296  | 113.9099105 | 131.4385953 | 138.846143  | Ptger4        |
| ENSMUSG00000031613 | 0.233888384 | -2.099195339 | 1.45E-22 | 3.05E-21 | 312.315352 | 328.717284 | 350.088801  | 74.55921415 | 63.15880553 | 94.94644643 | Hpgd          |
| ENSMUSG00000097233 | 0.404611282 | -2.016001055 | 1.47E-22 | 3.10E-21 | 440.497164 | 120.334006 | 87.9624732  | 442.1775617 | 485.6400047 | 492.0880342 | Gm17552       |
| ENSMUSG00000049130 | 0.124070059 | -3.010773098 | 1.51E-22 | 3.17E-21 | 292.627851 | 508.729129 | 626.887485  | 56.95495526 | 59.74481604 | 60.23484236 | CSar1         |
| ENSMUSG00000026278 | 0.29436033  | -1.764344836 | 1.60E-22 | 3.34E-21 | 474.28979  | 503.837503 | 588.481334  | 170.8648658 | 157.8971038 | 131.6999096 | Bok           |
| ENSMUSG00000035566 | 0.110974854 | -3.171695285 | 1.64E-22 | 3.43E-21 | 175.397733 | 166.315292 | 250.259431  | 26.92416067 | 21.33774343 | 17.35580249 | Pcdh17        |
| ENSMUSG00000007867 | 2.244773383 | 1.166569808  | 1.65E-22 | 3.44E-21 | 394.6449   | 430.463109 | 432.378917  | 971.3408733 | 885.0767747 | 964.7784073 | Ifit43        |
| ENSMUSG00000001506 | 0.215456809 | -2.214529402 | 1.73E-22 | 3.61E-21 | 118148.271 | 90511.717  | 162844.555  | 30295.89402 | 21952.8059  | 27794.8065  | Col1a1        |
| ENSMUSG00000045136 | 0.160832151 | -2.636372257 | 1.76E-22 | 3.66E-21 | 377.642059 | 411.87493  | 664.054727  | 83.87911592 | 75.10776873 | 74.5278558  | Tubb2f        |
| ENSMUSG00000069662 | 0.150141877 | -2.735601675 | 1.76E-22 | 3.67E-21 | 5272.67064 | 7440.16352 | 12252.8008  | 1337.923676 | 1082.234668 | 1328.229321 | Markcs        |
| ENSMUSG00000097767 | 0.117734814 | -3.086387109 | 1.86E-22 | 3.86E-21 | 178.977279 | 137.94386  | 185.836211  | 22.7819821  | 15.362597   | 21.43952016 | Miat          |
| ENSMUSG00000020607 | 30.49445857 | 4.930475196  | 1.88E-22 | 3.90E-21 | 2.68465919 | 20.5448302 | 4.95563229  | 282.703687  | 268.8516722 | 314.4462957 | Fam84a        |
| ENSMUSG00000020592 | 0.495778063 | -1.012233658 | 1.89E-22 | 3.92E-21 | 3137.4177  | 2863.558   | 3275.67294  | 1533.641613 | 1463.747993 | 1601.838435 | Sdc1          |
| ENSMUSG00000055782 | 0.150541902 | -2.731762993 | 2.01E-22 | 4.17E-21 | 1249.26141 | 725.917334 | 771.839799  | 180.1847675 | 112.6615331 | 121.4906143 | Abcd2         |
| ENSMUSG00000030761 | 0.247370263 | -2.015256014 | 2.07E-22 | 4.28E-21 | 1340.53982 | 919.625734 | 870.952375  | 278.5615084 | 204.6865289 | 256.2533124 | Myo7a         |
| ENSMUSG00000015869 | 2.071435991 | 1.050631124  | 2.09E-22 | 4.32E-   |            |            |             |             |             |             |               |

|                     |              |              |          |          |            |            |            |             |             |             |               |
|---------------------|--------------|--------------|----------|----------|------------|------------|------------|-------------|-------------|-------------|---------------|
| ENSMUSG00000057191  | 0.189103916  | -2.402748855 | 6.21E-22 | 1.24E-20 | 222.826712 | 326.760633 | 319.638283 | 51.77723205 | 58.03782129 | 54.10926517 | AB124611      |
| ENSMUSG00000015647  | 2.307045663  | 1.206046559  | 6.27E-22 | 1.25E-20 | 4440.42629 | 3801.77192 | 3429.29755 | 9087.93977  | 8686.042755 | 9161.821616 | Lama5         |
| ENSMUSG00000000957  | 0.16277903   | -2.619013243 | 6.85E-22 | 1.36E-20 | 7117.92639 | 8178.79908 | 15460.3338 | 1587.489935 | 1699.313268 | 1719.245331 | Mmp14         |
| ENSMUSG00000023216  | 1088.825041  | 0.08855644   | 6.85E-22 | 1.36E-20 | 0          | 1.9566505  | 0          | 569.5495526 | 727.1797609 | 918.8365784 | Epb42         |
| ENSMUSG00000025656  | 2.561929225  | 1.357230621  | 6.84E-22 | 1.36E-20 | 282.784101 | 239.689686 | 239.109258 | 631.682231  | 677.679613  | 645.2274639 | Arhgef9       |
| ENSMUSG00000039903  | 3.573622074  | 3.873870701  | 6.92E-22 | 1.37E-20 | 108.281254 | 109.572428 | 135.04098  | 371.7605261 | 468.5700572 | 414.4973898 | Eva1c         |
| ENSMUSG00000020124  | 3.068264245  | 1.617422736  | 7.84E-22 | 1.55E-20 | 897.571055 | 990.065152 | 661.576911 | 2480.129415 | 2676.567758 | 2673.814443 | Usp15         |
| ENSMUSG00000022346  | 0.247240143  | -2.016015089 | 7.90E-22 | 1.56E-20 | 281.889215 | 341.435512 | 370.433514 | 72.48812487 | 89.61722406 | 82.69529205 | Myc           |
| ENSMUSG00000037613  | 0.222287439  | -2.169501668 | 8.14E-22 | 1.61E-20 | 270.255691 | 264.147817 | 330.788455 | 70.41703559 | 52.91683706 | 69.42320814 | Tnfrsf23      |
| ENSMUSG00000038366  | 0.38869409   | -1.363292924 | 8.57E-22 | 1.69E-20 | 2733.87794 | 3129.66247 | 3670.88462 | 1273.719908 | 1167.584405 | 1263.91076  | Lasp1         |
| ENSMUSG00000024404  | 2.143345129  | 1.099864177  | 1.05E-21 | 2.06E-20 | 1821.09381 | 2192.42688 | 1933.9355  | 4030.339743 | 4240.174944 | 4476.775996 | Rick3         |
| ENSMUSG00000020914  | 0.367838909  | -1.442854003 | 1.08E-21 | 2.13E-20 | 567.357975 | 695.589252 | 662.815819 | 227.819821  | 232.1512852 | 248.0858762 | Top2a         |
| ENSMUSG00000004891  | 2.039397318  | 1.02814287   | 1.08E-21 | 2.13E-20 | 2625.59668 | 2223.73329 | 2539.76155 | 5248.140241 | 4967.354705 | 4853.498993 | Nes           |
| ENSMUSG00000029695  | 11.51601557  | 3.525569739  | 1.11E-21 | 2.17E-20 | 16.1079551 | 14.6748787 | 22.3003453 | 165.6871426 | 164.7249928 | 274.630044  | Aass          |
| ENSMUSG00000053641  | 2.636950069  | 1.398870254  | 1.13E-21 | 2.22E-20 | 1443.45176 | 1076.15777 | 1127.40635 | 3261.965619 | 3325.225761 | 3035.223497 | Dennd4a       |
| ENSMUSG00000019979  | 0.40131233   | -1.317202612 | 1.21E-21 | 2.36E-20 | 178.593776 | 688.740975 | 789.184442 | 283.7392316 | 318.3545197 | 277.6928326 | Apaf1         |
| ENSMUSG00000030123  | 0.499420552  | -1.001672903 | 1.35E-21 | 2.63E-20 | 4511.12232 | 4312.4577  | 3927.33859 | 2194.319094 | 1992.916364 | 2183.768268 | Plxd1         |
| ENSMUSG00000021950  | 0.077543182  | -3.688856252 | 1.39E-21 | 2.71E-20 | 273.835237 | 158.48869  | 178.402762 | 12.42653569 | 22.19093167 | 12.25115438 | Anxa8         |
| ENSMUSG00000031871  | 0.328743035  | -1.604967767 | 1.41E-21 | 2.75E-20 | 4870.86665 | 3956.34731 | 3247.17806 | 1380.381006 | 1257.201629 | 1333.333968 | Cdh5          |
| ENSMUSG00000021796  | 2.611814657  | 1.385052522  | 1.46E-21 | 2.85E-20 | 2560.26998 | 2013.39336 | 1919.0686  | 5408.64966  | 6078.608283 | 5477.286937 | Bmpr1a        |
| ENSMUSG00000046442  | 2.673094473  | 1.418510826  | 1.49E-21 | 2.91E-20 | 405.383537 | 349.262114 | 307.249202 | 981.6963197 | 969.5730146 | 894.3342696 | Ppm1e         |
| ENSMUSG00000024302  | 3.064357199  | 1.615584476  | 1.56E-21 | 3.02E-20 | 730.227299 | 952.888792 | 639.276565 | 2475.987237 | 2398.327615 | 2248.086828 | Dtna          |
| ENSMUSG00000024420  | 0.236845373  | -2.077982607 | 1.57E-21 | 3.04E-20 | 1342.32959 | 960.715394 | 830.068409 | 279.5970531 | 223.6163115 | 239.9184399 | Zfp251        |
| ENSMUSG00000089417  | 18.08545805  | 4.176758232  | 1.64E-21 | 3.18E-20 | 10.7386367 | 9.78325249 | 24.7181615 | 300.3079459 | 335.4244672 | 163.348725  | Gm22009       |
| ENSMUSG00000047534  | 4.308977049  | 2.107345414  | 1.65E-21 | 3.19E-20 | 66.2215933 | 93.9192239 | 99.1126458 | 377.973794  | 403.7042569 | 328.7393092 | Mis18bp1      |
| ENSMUSG00000025795  | 2.450444204  | 1.293043297  | 1.86E-21 | 3.59E-20 | 2252.42906 | 2788.22696 | 2969.66265 | 6174.952694 | 6844.195426 | 6601.330351 | Rassf3        |
| ENSMUSG00000025059  | 3.835542596  | 1.939431699  | 1.86E-21 | 3.60E-20 | 199.559666 | 200.556676 | 157.341325 | 572.6561865 | 834.7204298 | 735.0692627 | Gk            |
| ENSMUSG00000023150  | 0.388815819  | -1.362841177 | 2.07E-21 | 3.99E-20 | 2605.90918 | 2409.61509 | 1982.25292 | 972.3764179 | 894.4652458 | 855.5389474 | Ivns1abp      |
| ENSMUSG00000039943  | 3.103042833  | 1.633683611  | 2.09E-21 | 4.03E-20 | 2671.23589 | 2051.54805 | 1771.63854 | 6587.099462 | 7275.211599 | 6299.13521  | Picb4         |
| ENSMUSG00000010660  | 2.30571958   | 1.205217064  | 2.14E-21 | 4.11E-20 | 939.630715 | 788.53015  | 780.512086 | 1847.41164  | 1880.25471  | 2062.277654 | Picd1         |
| ENSMUSG00000038179  | 0.079360606  | -3.655433145 | 2.16E-21 | 4.15E-20 | 122.826712 | 414.809905 | 92.269659  | 25.88861603 | 17.92344481 | 22.46044969 | Slamf7        |
| ENSMUSG00000024924  | 3.51934925   | 1.5926053    | 2.20E-21 | 4.21E-20 | 1453.29551 | 1436.18147 | 1085.28347 | 4602.911327 | 3561.002206 | 3561.002206 | Vldlr         |
| ENSMUSG00000088185  | 34.09793561  | 5.091612492  | 2.24E-21 | 4.29E-20 | 3.57954558 | 5.86995149 | 8.67235651 | 234.0330889 | 260.3166985 | 106.1766713 | Scarna2       |
| ENSMUSG00000030986  | 2.360599419  | 1.239153245  | 2.25E-21 | 4.31E-20 | 454.602289 | 455.899566 | 374.150238 | 1028.295829 | 1021.636354 | 989.280716  | Dhx32         |
| ENSMUSG00000028832  | 0.168969913  | -2.56516714  | 2.30E-21 | 4.40E-20 | 447.443198 | 699.502553 | 820.157144 | 125.3009016 | 117.7826373 | 88.82086924 | Stmn1         |
| ENSMUSG00000034855  | 0.033494552  | -4.899929728 | 2.33E-21 | 4.44E-20 | 205.823871 | 695.589252 | 664.054727 | 8.284357128 | 27.3119159  | 16.3348725  | Cxcl10        |
| ENSMUSG00000049548  | 3.24530462   | 1.698454297  | 2.43E-21 | 4.63E-20 | 148.551142 | 129.138933 | 117.696267 | 391.4358743 | 425.8951886 | 460.648514  | Cdc69         |
| ENSMUSG00000029659  | 0.276899254  | -1.852566929 | 2.52E-21 | 4.81E-20 | 1571.42051 | 1594.67016 | 2134.63861 | 587.1538115 | 411.3857333 | 469.6275845 | Medag         |
| ENSMUSG000000109866 | 0.231822862  | -2.108905243 | 2.63E-21 | 5.01E-20 | 212.982962 | 194.686724 | 92.269659  | 46.59950885 | 47.79585283 | 44.92089939 | Gm45714       |
| ENSMUSG00000025584  | 0.294827767  | -1.762055269 | 2.80E-21 | 5.32E-20 | 737.38639  | 515.577406 | 626.887405 | 184.3269461 | 178.3809507 | 191.9347519 | Pde8a         |
| ENSMUSG00000055675  | 0.355348257  | -1.492694472 | 2.88E-21 | 5.46E-20 | 708.750025 | 571.341945 | 634.320933 | 242.317446  | 208.2533588 | 230.7300741 | kbtbd11       |
| ENSMUSG00000031409  | 280.6828898  | 8.132797311  | 3.16E-21 | 6.00E-20 | 0          | 0.97832525 | 2.4778165  | 280.6325977 | 262.8771906 | 317.5009843 | Tcea16        |
| ENSMUSG00000031494  | 0.113755509  | -3.135991685 | 3.26E-21 | 6.18E-20 | 178.082393 | 146.748787 | 168.491498 | 26.92416067 | 16.21645007 | 13.27208391 | Cd209a        |
| ENSMUSG00000024066  | 0.208125313  | -2.264475655 | 3.29E-21 | 6.22E-20 | 3049.77284 | 2571.03875 | 1838.53958 | 609.9357936 | 386.6340395 | 557.4275242 | Xdh           |
| ENSMUSG00000026586  | 0.445096935  | -1.167808529 | 3.37E-21 | 6.36E-20 | 9218.22476 | 7601.58718 | 3937.65014 | 4071.761528 | 3621.389349 | 3949.976357 | Prrn1         |
| ENSMUSG00000022489  | 0.315360316  | -1.664926967 | 3.62E-21 | 6.84E-20 | 375.852286 | 357.088716 | 339.460812 | 98.3767409  | 122.0501242 | 117.4068961 | Pde1b         |
| ENSMUSG00000029563  | 3.256526001  | 1.703333746  | 3.77E-21 | 7.10E-20 | 478.764222 | 436.333061 | 669.010359 | 1693.115488 | 1763.32557  | 1691.680234 | Foxp2         |
| ENSMUSG00000051615  | 0.459145484  | -1.12297674  | 3.77E-21 | 7.10E-20 | 1127.55686 | 983.216875 | 1116.25617 | 503.2746955 | 481.3725178 | 497.1926819 | Rap2a         |
| ENSMUSG000000109857 | 3.700993337  | 1.887561664  | 3.82E-21 | 7.19E-20 | 49.4886395 | 71.417743  | 85.484657  | 279.5970531 | 332.0104777 | 299.1323527 | Gm32817       |
| ENSMUSG00000038982  | 0.392242578  | -1.350181945 | 3.85E-21 | 7.24E-20 | 2430.51145 | 2663.00133 | 3247.17806 | 1040.722364 | 1095.037128 | 1134.25271  | Elk3          |
| ENSMUSG00000039936  | 0.267776065  | -1.900901084 | 4.20E-21 | 7.89E-20 | 587.940362 | 873.644447 | 812.723696 | 195.7179372 | 224.4698088 | 187.8510338 | Pik3cd        |
| ENSMUSG00000049001  | 0.20499474   | -2.286341203 | 4.22E-21 | 7.91E-20 | 907.414805 | 580.146872 | 532.730471 | 140.8340712 | 133.9990874 | 139.8673458 | Ndnf          |
| ENSMUSG00000021886  | 0.106283866  | -3.23400549  | 4.29E-21 | 8.03E-20 | 172.713074 | 316.977381 | 340.69972  | 24.85307138 | 32.43290013 | 30.62788595 | Gpr65         |
| ENSMUSG00000031274  | 4.000114639  | 2.000041347  | 4.64E-21 | 8.68E-20 | 2205.89496 | 1245.40804 | 1448.28354 | 6480.438364 | 6784.45061  | 6340.99332  | Col4a5        |
| ENSMUSG00000019838  | 4.818480497  | 2.268578266  | 4.71E-21 | 8.81E-20 | 186.13637  | 312.085754 | 203.180924 | 1288.217533 | 1185.50785  | 907.6063535 | Slc16a10      |
| ENSMUSG00000071656  | 0.225343213  | -2.149804097 | 4.88E-21 | 9.11E-20 | 767.812527 | 654.499591 | 781.750994 | 222.6420978 | 133.9990874 | 140.8882754 | Lrn4cl        |
| ENSMUSG000000303283 | 0.12164791   | -3.039216558 | 5.01E-21 | 9.35E-20 | 281.889215 | 603.626678 | 424.945649 | 60.06158918 | 56.33082655 | 42.87904032 | Hck           |
| ENSMUSG00000028035  | 2.712123726  | 1.439422995  | 5.10E-21 | 9.50E-20 | 2338.33815 | 1987.95691 | 1650.22555 | 5755.557115 | 5084.283845 | 5379.277702 | Tnfbj4        |
| ENSMUSG00000050675  | 0.1600181339 | 4.000163501  | 5.65E-21 | 1.05E-19 | 36.6903422 | 35.219709  | 14.8668969 | 410.0756778 | 279.0936406 | 715.6716016 | Grp1ba        |
| ENSMUSG00000030579  | 0.182753044  | -2.452032662 | 5.82E-21 | 1.08E-19 | 1009.43185 | 1564.34207 | 1314.48147 | 325.1610173 | 186.0624271 | 200.1021882 | Tyrobp        |
| ENSMUSG00000075184  | 148.9863441  | 7.219036291  | 5.85E-21 | 1.09E-19 | 0.8948864  | 2.93497575 | 0          | 204.0022943 | 227.0303009 | 173.5580204 | F930017D23Rik |
| ENSMUSG00000013707  | 0.180238957  | -2.472017223 | 5.93E-21 | 1.10E-19 | 323.721599 | 311.107429 | 351.849893 | 57.9904999  | 55.47732918 | 45.94182899 | TnfaiP2       |
| ENSMUSG00000067212  | 0.287866079  | -1.796530296 | 6.20E-21 | 1.15E-19 | 2579.95748 | 4169.62221 | 3096.03127 | 980.660775  | 885.0767747 | 968.8621254 | Hnf1b         |
| ENSMUSG00000029408  | 2.92510534   | 1.548488581  | 6.32E-21 | 1.17E-19 | 191.505689 | 157.510365 | 206.897648 | 521.9144991 | 524.0473864 | 576.8251853 | Abcb9         |
| ENSMUSG00000032006  | 3.20320659   | 1.808303763  | 6.62E-21 | 1.22E-19 | 922.627874 | 810.053306 | 557.508633 | 2758.690924 | 2736.312575 | 2537.009886 | Pdgfr         |
| ENSMUSG00000027314  | 0.274363223  | -1.865840985 | 6.73E-21 | 1.24E-19 | 641.633546 | 539.057212 | 450.962538 | 156.3672408 | 132.2920927 | 160.2859364 | Dil4          |
| ENSMUSG00000031340  | 4.432171122  | 2.148013583  | 6.80E-21 | 1.26E-19 | 233.565349 | 152.618739 | 154.863059 | 944.4167126 | 782.6570901 | 677.8972089 | Gabre         |
| ENSMUSG00000019960  | 0.368438949  | -1.440502514 | 7.33E-21 | 1.35E-19 | 133.458584 | 133        |            |             |             |             |               |

|                     |             |              |          |          |             |            |            |             |             |             |               |
|---------------------|-------------|--------------|----------|----------|-------------|------------|------------|-------------|-------------|-------------|---------------|
| ENSMUSG00000001657  | 0.172741513 | -2.533313264 | 1.80E-20 | 3.22E-19 | 1021.96026  | 1447.92137 | 2244.90143 | 270.2771513 | 262.0236932 | 281.7765507 | Hoxc8         |
| ENSMUSG00000029671  | 9.131112775 | 3.190790687  | 1.82E-20 | 3.25E-19 | 43.8494334  | 38.1546847 | 97.8737377 | 446.3197403 | 600.8621499 | 576.8251853 | Wnt16         |
| ENSMUSG00000056445  | 5.12679787  | 2.358058019  | 1.86E-20 | 3.31E-19 | 56.3778429  | 39.1330099 | 38.4061503 | 208.1444728 | 253.4887195 | 229.7091446 | Hoxaas2       |
| ENSMUSG000000298125 | 0.239198125 | -2.064194423 | 1.88E-20 | 3.35E-19 | 116.2661199 | 1119.20408 | 381.3825   | 403.86241   | 272.2656617 | 343.0323226 | Dnm1          |
| ENSMUSG00000039476  | 0.200603868 | -2.317578668 | 1.94E-20 | 3.45E-19 | 221.931826  | 254.364565 | 325.832823 | 57.9904999  | 47.79585283 | 55.1301947  | Prrn2         |
| ENSMUSG00000032332  | 0.145646144 | -2.779460588 | 1.96E-20 | 3.48E-19 | 7079.44627  | 3001.50186 | 3569.29416 | 725.9167934 | 588.913867  | 673.8134908 | Col12a1       |
| ENSMUSG00000040714  | 7.238625469 | 2.855715772  | 1.99E-20 | 3.53E-19 | 42.954547   | 21.5231555 | 38.4061503 | 205.0378389 | 283.3611275 | 255.2323829 | Klc3          |
| ENSMUSG00000001053  | 0.296995165 | -1.75148865  | 2.01E-20 | 3.56E-19 | 284.573874  | 326.760633 | 354.327709 | 100.4478302 | 92.17771617 | 93.9255169  | Nabp3         |
| ENSMUSG00000029417  | 0.054736223 | -4.191360315 | 2.20E-20 | 3.89E-19 | 248.778418  | 1063.43955 | 729.716855 | 37.27960708 | 36.70038699 | 37.77439267 | Cxcl9         |
| ENSMUSG00000054728  | 4.204043417 | 2.071777569  | 2.24E-20 | 3.97E-19 | 599.786942  | 364.915318 | 542.641736 | 1634.089444 | 1587.505112 | 1841.756875 | Phactr1       |
| ENSMUSG00000079547  | 0.169005499 | -2.564857908 | 2.30E-20 | 4.06E-19 | 595.994339  | 1246.38637 | 939.092319 | 149.1184283 | 177.5274534 | 142.9301344 | H2-DMb1       |
| ENSMUSG00000024085  | 0.446373895 | -1.163675437 | 2.42E-20 | 4.27E-19 | 3951.81832  | 3177.60041 | 3573.01088 | 1711.755292 | 1520.932317 | 1545.687311 | Man2a1        |
| ENSMUSG00000026872  | 0.47942244  | -1.060630658 | 2.51E-20 | 4.43E-19 | 5057.00302  | 4467.03309 | 4767.31826 | 2369.326139 | 2053.514677 | 2430.833215 | Zeb2          |
| ENSMUSG00000086389  | 10.85176113 | 3.439857292  | 2.66E-20 | 4.69E-19 | 18.7926143  | 12.7182282 | 7.43344844 | 125.3009016 | 156.1900191 | 152.1185002 | Gm15998       |
| ENSMUSG00000098424  | 4.747019465 | 2.247021966  | 2.69E-20 | 4.74E-19 | 49.2187517  | 37.1763594 | 59.4675875 | 229.8909103 | 239.8327615 | 217.4579902 | Gm27202       |
| ENSMUSG00000019326  | 2.169390252 | 1.117289603  | 2.85E-20 | 5.02E-19 | 5719.21895  | 4463.11978 | 5065.89511 | 10921.88933 | 11329.32412 | 10830.02047 | Aoc3          |
| ENSMUSG000000315829 | 4.119715606 | 2.042544748  | 2.87E-20 | 5.05E-19 | 51.9034199  | 49.8945877 | 56.9897713 | 238.1752674 | 203.1323745 | 211.332413  | Ppp1r26       |
| ENSMUSG00000026463  | 2.340160127 | 1.226607251  | 2.96E-20 | 5.20E-19 | 4597.03141  | 3713.72264 | 3493.72076 | 9254.662457 | 9443.094923 | 8934.15433  | Atp2b4        |
| ENSMUSG00000015355  | 0.230766687 | -1.251493122 | 3.08E-20 | 5.41E-19 | 281.889215  | 361.002017 | 253.976155 | 66.27485703 | 74.25427136 | 66.36041955 | Cd48          |
| ENSMUSG00000040138  | 11.89777509 | 3.572619906  | 3.13E-20 | 5.48E-19 | 8.94886395  | 11.739903  | 11.1501727 | 100.4478302 | 133.14559   | 142.9301344 | Ndp           |
| ENSMUSG00000009585  | 0.376050554 | -1.411001472 | 3.30E-20 | 5.78E-19 | 997.798331  | 1202.36173 | 1001.03772 | 374.86716   | 453.2071045 | 374.6811381 | Apobec3       |
| ENSMUSG00000039706  | 0.368534661 | -1.440127781 | 3.39E-20 | 5.92E-19 | 892.201736  | 861.904544 | 909.358525 | 383.1515172 | 320.9150119 | 277.6928326 | Ldb2          |
| ENSMUSG00000005360  | 0.140706094 | -2.829243282 | 3.55E-20 | 6.20E-19 | 1743.2387   | 982.23855  | 1085.28347 | 254.7439817 | 149.3620401 | 132.7208391 | Slc1a3        |
| ENSMUSG00000039621  | 0.35319762  | -1.501452472 | 3.69E-20 | 6.43E-19 | 686.377865  | 901.037554 | 717.327774 | 265.0994281 | 265.4376827 | 283.8184098 | Prex1         |
| ENSMUSG00000039349  | 0.354521538 | -1.496054816 | 3.74E-20 | 6.52E-19 | 1669.85801  | 1773.70368 | 2144.54987 | 698.9926327 | 560.7477734 | 721.7971788 | C130074G19Rik |
| ENSMUSG00000071042  | 0.233535246 | -2.098287794 | 3.92E-20 | 6.83E-19 | 447.443198  | 479.379372 | 385.300411 | 93.19901769 | 130.5850979 | 81.67436252 | Rasgrp3       |
| ENSMUSG00000016756  | 0.399875603 | -1.32269472  | 4.07E-20 | 7.07E-19 | 800.923324  | 737.657237 | 745.82266  | 314.8055709 | 266.2911801 | 333.8439568 | Cmah          |
| ENSMUSG00000031480  | 0.308858154 | -1.694983674 | 4.28E-20 | 7.43E-19 | 485.923313  | 439.268037 | 375.389146 | 144.9762497 | 121.1966268 | 136.8045572 | Thsd1         |
| ENSMUSG000000102752 | 2.327156989 | 1.218568538  | 4.42E-20 | 7.66E-19 | 262.201714  | 238.711361 | 273.798684 | 584.0471775 | 606.8366315 | 609.4949303 | Gm7694        |
| ENSMUSG00000026928  | 0.084995491 | -3.556469875 | 4.46E-20 | 7.73E-19 | 173.389209  | 214.253229 | 227.959085 | 11.39099105 | 16.21645007 | 20.41859063 | Card9         |
| ENSMUSG00000021876  | 0.406359499 | -1.299171475 | 4.60E-20 | 7.96E-19 | 584.723328  | 4692.04789 | 561.29103  | 2311.335639 | 1850.382302 | 2218.479872 | Rnase4        |
| ENSMUSG00000036139  | 0.16313429  | -2.563758913 | 4.65E-20 | 8.05E-19 | 485.923313  | 610.474955 | 966.348297 | 129.4430801 | 104.9801768 | 114.3441075 | Hoxc9         |
| ENSMUSG00000021190  | 0.362006878 | -1.465910985 | 5.82E-20 | 1.00E-18 | 4250.71038  | 5754.50911 | 6180.91237 | 1944.752836 | 1970.725432 | 1942.828898 | Lgmn          |
| ENSMUSG00000028487  | 0.10859312  | -3.202995398 | 6.91E-20 | 1.19E-18 | 236.250008  | 136.965535 | 226.720177 | 23.81752674 | 24.75142379 | 16.3348725  | Bnc2          |
| ENSMUSG00000032609  | 2.142385609 | 1.099218175  | 7.43E-20 | 1.28E-18 | 732.911958  | 706.35083  | 858.563294 | 1652.729247 | 1593.479593 | 1670.240714 | Klhdcb8       |
| ENSMUSG00000078640  | 3.151190489 | 1.655896968  | 7.73E-20 | 1.33E-18 | 122.599436  | 112.507404 | 95.3959216 | 326.1965619 | 357.6153989 | 362.4299837 | Gm11627       |
| ENSMUSG00000079334  | 2.815090303 | 1.493181202  | 7.95E-20 | 1.36E-18 | 447.01706   | 459.812867 | 573.614438 | 1219.871587 | 1448.38504  | 1405.819965 | Nat6          |
| ENSMUSG00000008730  | 2.381758745 | 1.252027286  | 8.03E-20 | 1.38E-18 | 2838.57965  | 2390.04858 | 2204.01746 | 5612.651954 | 5621.987189 | 6475.756018 | Hipk1         |
| ENSMUSG00000048078  | 0.287625174 | -1.797738143 | 8.27E-20 | 1.42E-18 | 316.789784  | 334.587235 | 400.167307 | 105.6255534 | 88.76372668 | 108.2185303 | Tenn4         |
| ENSMUSG00000022140  | 2.910818125 | 1.514195389  | 8.43E-20 | 1.44E-18 | 4603.29562  | 4726.28928 | 5115.45143 | 11897.37238 | 9306.535344 | 11166.92722 | Dusp1         |
| ENSMUSG00000009394  | 50.39346246 | 5.65516468   | 8.49E-20 | 1.45E-18 | 3.57954558  | 2.93497575 | 0          | 114.9454552 | 120.3431294 | 120.4696847 | Gm16867       |
| ENSMUSG00000039057  | 0.147971665 | -2.756607157 | 8.50E-20 | 1.45E-18 | 180.767052  | 157.510365 | 239.109258 | 33.13742851 | 23.89792642 | 28.58602688 | St6galnc5     |
| ENSMUSG00000020415  | 2.199014359 | 1.136857025  | 8.75E-20 | 1.49E-18 | 569.147747  | 670.152795 | 688.832888 | 1476.686658 | 1396.321701 | 1361.919995 | Pttg1         |
| ENSMUSG00000013033  | 2.310639621 | 1.208292267  | 9.49E-20 | 1.62E-18 | 2140.56826  | 1803.05343 | 2295.69666 | 4904.33942  | 4406.606931 | 5102.605799 | Adgrl1        |
| ENSMUSG00000040751  | 0.128885918 | -2.958833449 | 1.05E-19 | 1.79E-18 | 175.319773  | 302.302502 | 203.205824 | 35.20851779 | 28.16541327 | 24.50230876 | Lad2          |
| ENSMUSG00000037725  | 0.168099098 | -2.572686406 | 1.07E-19 | 1.82E-18 | 132.443187  | 146.748787 | 152.385693 | 25.88861603 | 21.3374343  | 25.52323829 | Ckap2         |
| ENSMUSG00000022014  | 0.12089272  | -3.04820073  | 1.11E-19 | 1.88E-18 | 289.488306  | 661.347868 | 540.16392  | 59.02604454 | 71.69377925 | 49.00461751 | Epst1         |
| ENSMUSG00000029762  | 0.319164382 | -1.647628434 | 1.14E-19 | 1.93E-18 | 549.460247  | 489.162624 | 542.641736 | 200.8956604 | 142.5340611 | 162.3277955 | Akr1b8        |
| ENSMUSG00000031075  | 3.362774038 | 1.74965184   | 1.14E-19 | 1.94E-18 | 930.681851  | 650.58629  | 578.57007  | 2434.565451 | 2543.422168 | 2294.028657 | Ano1          |
| ENSMUSG00000008496  | 0.096714922 | -3.370117698 | 1.15E-19 | 1.95E-18 | 411.647742  | 760.158718 | 1107.58382 | 68.34594631 | 97.2987004  | 54.10926517 | Ptp2f2        |
| ENSMUSG00000034641  | 0.192220591 | -2.37916521  | 1.15E-19 | 1.95E-18 | 349.005694  | 598.735052 | 581.047886 | 100.4478302 | 85.3497372  | 108.2185303 | Cd300ld       |
| ENSMUSG00000029470  | 0.392580175 | -1.348940774 | 1.16E-19 | 1.96E-18 | 1270.73868  | 1420.52826 | 1653.94228 | 525.021133  | 565.0152602 | 614.599578  | P2rx4         |
| ENSMUSG00000037936  | 0.10360677  | -1.308977719 | 1.17E-19 | 1.98E-18 | 1086.39208  | 946.040515 | 935.375495 | 429.751026  | 352.494416  | 417.5601784 | Scarb1        |
| ENSMUSG00000040111  | 0.261776153 | -1.933594419 | 1.24E-19 | 2.09E-18 | 469.815358  | 358.067041 | 341.938628 | 103.5546441 | 111.8085157 | 90.86272831 | Gram1b        |
| ENSMUSG00000052776  | 0.076291786 | -3.712328453 | 1.34E-19 | 2.26E-18 | 197.769893  | 354.165586 | 496.802162 | 38.31515172 | 23.04442904 | 32.66974501 | Oas1a         |
| ENSMUSG00000002668  | 0.161393079 | -2.631349383 | 1.42E-19 | 2.39E-18 | 186.13637   | 293.497575 | 268.843052 | 43.49287492 | 45.23536071 | 31.64881548 | Dennd1c       |
| ENSMUSG00000090231  | 0.14696562  | -2.766449396 | 1.45E-19 | 2.43E-18 | 416.122174  | 678.957723 | 713.611005 | 94.23456233 | 58.89131867 | 113.327138  | Cfb           |
| ENSMUSG00000020437  | 0.139263798 | -2.479843928 | 1.50E-19 | 2.51E-18 | 405.383537  | 703.415854 | 439.812366 | 75.59475879 | 100.7126899 | 101.0720236 | Myo1g         |
| ENSMUSG00000048332  | 2.129929629 | 1.090805766  | 1.51E-19 | 2.53E-18 | 3622.50013  | 2900.73436 | 3575.4887  | 7269.52338  | 7165.110448 | 7072.999794 | Lhfp          |
| ENSMUSG00000022791  | 2.179376979 | 1.123915769  | 1.65E-19 | 2.76E-18 | 1157.08811  | 1155.40212 | 1179.44049 | 2336.18871  | 2388.939214 | 2885.146856 | Tnk2          |
| ENSMUSG00000065701  | 369.7258406 | 8.530312068  | 1.76E-19 | 2.95E-18 | 0.8948864   | 1.9566505  | 0          | 519.8434098 | 166.4319875 | 435.93691   | Rny1          |
| ENSMUSG00000026786  | 0.296225135 | -1.755234034 | 1.78E-19 | 2.98E-18 | 493.97729   | 689.7193   | 661.576911 | 178.1136783 | 166.4319875 | 202.1440472 | Apbb1p        |
| ENSMUSG00000024098  | 2.389199019 | 1.256527035  | 1.86E-19 | 3.10E-18 | 4031.46321  | 3163.90385 | 4168.06541 | 8144.558602 | 8860.156218 | 7713.122611 | Twsr1         |
| ENSMUSG00000031431  | 0.319302155 | -1.647005807 | 1.98E-19 | 3.30E-18 | 5140.22746  | 4148.09905 | 3600.26686 | 1604.058649 | 1338.283879 | 1174.068961 | Tsc22d3       |
| ENSMUSG00000027306  | 4.592976977 | 2.199429552  | 2.15E-19 | 3.58E-18 | 139.602278  | 173.163569 | 166.013682 | 878.1418556 | 809.969006  | 508.4229067 | Nusap1        |
| ENSMUSG00000022332  | 2.128003684 | 1.089500648  | 2.26E-19 | 3.76E-18 | 736.491503  | 697.545902 | 846.174214 | 1633.053899 | 1666.880367 | 1545.687311 | Khdcb3        |
| ENSMUSG00000029771  | 0.168153065 | -2.572153023 | 2.31E-19 | 3.84E-18 | 426.860811  | 855.056267 | 844.935306 | 125.3009016 | 117.7826373 | 114.3441075 | Irf5          |
| ENSMUSG00000062380  | 0.151912995 | -2.718682811 | 2.43E-19 | 4.03E-18 | 119.417477  | 141.857161 | 138.757704 | 22.7819821  | 18.7769     |             |               |

|                     |             |               |          |          |            |            |            |             |             |             |               |
|---------------------|-------------|---------------|----------|----------|------------|------------|------------|-------------|-------------|-------------|---------------|
| ENSMUSG00000015568  | 0.235165117 | -2.088254019  | 4.67E-19 | 7.56E-18 | 18891.9467 | 18068.689  | 30788.1045 | 6123.175462 | 5489.695097 | 4318.531918 | Lpl           |
| ENSMUSG00000074971  | 7.256406936 | 2.859255364   | 4.87E-19 | 7.88E-18 | 581.676157 | 338.500536 | 992.365366 | 4673.412965 | 4764.22233  | 4425.729519 | Fibin         |
| ENSMUSG00000022952  | 0.195917459 | -2.351682127  | 4.98E-19 | 8.04E-18 | 762.443209 | 993.000127 | 1536.24601 | 229.8909103 | 196.3043956 | 218.4789197 | Runx1         |
| ENSMUSG00000047407  | 0.412871122 | -1.27623658   | 5.06E-19 | 8.17E-18 | 488.607972 | 501.880853 | 541.402828 | 195.7179372 | 220.203222  | 215.4161312 | TgIf1         |
| ENSMUSG00000002847  | 0.135144109 | -2.887429471  | 5.16E-19 | 8.33E-18 | 204.928985 | 250.451264 | 351.849893 | 48.67059813 | 29.01891065 | 31.64881548 | Pla1a         |
| ENSMUSG00000071818  | 39.88953999 | 5.317938581   | 5.22E-19 | 8.42E-18 | 4.74443198 | 1.9566055  | 1.23890807 | 103.5544641 | 102.4196846 | 116.3859666 | 4930417022Rik |
| ENSMUSG00000041219  | 0.213115748 | -2.230290892  | 5.63E-19 | 9.07E-18 | 263.991487 | 329.695609 | 255.215063 | 72.48812487 | 46.08885809 | 63.29763095 | Arhgap11a     |
| ENSMUSG00000025038  | 27.94329706 | 4.804430351   | 5.94E-19 | 9.55E-18 | 5.36931837 | 3.91330099 | 2.47781615 | 89.05683913 | 141.6805637 | 107.1976008 | Ehfc2         |
| ENSMUSG00000060206  | 0.262883997 | -1.927501776  | 6.13E-19 | 9.84E-18 | 381.221604 | 268.061118 | 317.160467 | 82.84357128 | 83.64274245 | 87.79993971 | Zfp462        |
| ENSMUSG00000054717  | 0.348438862 | -1.521022557  | 6.46E-19 | 1.04E-17 | 632.684682 | 851.142966 | 755.733924 | 244.3885353 | 250.07473   | 285.8602688 | Hmgb2         |
| ENSMUSG00000009281  | 2.126332478 | 1.088367197   | 7.03E-19 | 1.13E-17 | 1942.79836 | 1559.45045 | 1610.58049 | 3543.633762 | 3730.637013 | 3601.839387 | Rarres2       |
| ENSMUSG00000020390  | 3.113062219 | 1.638334411   | 7.09E-19 | 1.14E-17 | 2217.52849 | 3463.27138 | 2876.74454 | 8383.769414 | 10025.18013 | 8227.671095 | Ube2b         |
| ENSMUSG00000082361  | 6.482192744 | 2.696481919   | 7.15E-19 | 1.14E-17 | 28.6363647 | 44.0246362 | 56.9897713 | 241.2819014 | 337.9849593 | 251.1486648 | Btc           |
| ENSMUSG00000050105  | 0.205018313 | -2.286175312  | 7.70E-19 | 1.23E-17 | 417.01706  | 731.787286 | 747.061568 | 136.6918926 | 127.1711084 | 124.5534028 | Grrp1         |
| ENSMUSG00000033083  | 0.349607788 | -1.516190773  | 7.91E-19 | 1.26E-17 | 735.596617 | 753.310441 | 572.37553  | 259.9217049 | 238.1257668 | 223.5835674 | Tbc1d4        |
| ENSMUSG00000063626  | 26.28732881 | 4.716295644   | 8.37E-19 | 1.34E-17 | 2.68465919 | 7.82660199 | 3.71672422 | 102.5189195 | 165.5784902 | 106.1766713 | Unc5d         |
| ENSMUSG00000021732  | 0.103173564 | -2.376854734  | 8.55E-19 | 1.36E-17 | 106.491481 | 105.659127 | 125.129715 | 9.319901769 | 10.24196846 | 15.31394297 | Fgf10         |
| ENSMUSG00000092741  | 3.497859746 | 1.806472442   | 8.61E-19 | 1.37E-17 | 132.443187 | 130.117258 | 89.2013812 | 415.253401  | 384.0738174 | 438.9996986 | Mir3074-1     |
| ENSMUSG00000020407  | 0.121790939 | -3.037521287  | 8.69E-19 | 1.38E-17 | 180.767052 | 218.16653  | 123.890807 | 23.81752674 | 18.77694218 | 21.43952016 | Upp1          |
| ENSMUSG00000032231  | 0.46046122  | -1.118848438  | 8.88E-19 | 1.41E-17 | 9931.44922 | 11592.1759 | 12884.644  | 5492.528776 | 5243.887853 | 5105.668587 | Anxa2         |
| ENSMUSG00000023991  | 2.054855207 | 1.03903674    | 9.61E-19 | 1.53E-17 | 721.278435 | 705.372504 | 739.628119 | 1526.392801 | 1339.990874 | 1585.503562 | Foxp4         |
| ENSMUSG00000060216  | 0.303956245 | -1.718064434  | 9.63E-19 | 1.53E-17 | 990.63924  | 1452.81299 | 1518.9013  | 394.5425082 | 380.6598279 | 428.7904032 | Arrb2         |
| ENSMUSG00000041120  | 0.417865545 | -1.258889287  | 1.04E-18 | 1.64E-17 | 4705.31267 | 4600.08532 | 5607.29794 | 2331.010987 | 1832.458858 | 2068.403231 | Nb1           |
| ENSMUSG00000038517  | 0.438203868 | -1.190325876  | 1.10E-18 | 1.75E-17 | 788.394914 | 777.768573 | 730.955763 | 368.6538922 | 303.8450644 | 335.885159  | Tbkbp1        |
| ENSMUSG00000040420  | 31.77832223 | 4.989971053   | 1.11E-18 | 1.76E-17 | 2.68465919 | 2.93497575 | 3.71672422 | 99.41228554 | 95.59170566 | 96.98830549 | Cdh18         |
| ENSMUSG00000006538  | 25.51674369 | 4.673372327   | 1.13E-18 | 1.78E-17 | 1.78977279 | 3.91330099 | 7.43344844 | 120.1231784 | 93.88471092 | 103.1138827 | Ihh           |
| ENSMUSG00000031673  | 0.210335784 | -2.250606238  | 1.13E-18 | 1.78E-17 | 2677.5001  | 1368.67702 | 1608.10268 | 381.0804279 | 434.401623  | 372.639279  | Cdh11         |
| ENSMUSG00000020227  | 0.366997405 | -1.4465158232 | 1.19E-18 | 1.87E-17 | 537.826724 | 497.967552 | 470.785068 | 171.9004104 | 170.6994744 | 211.323413  | Iraak3        |
| ENSMUSG00000027035  | 0.315512322 | -1.664231745  | 1.21E-18 | 1.91E-17 | 465.340926 | 556.667066 | 469.54616  | 187.43358   | 139.1200716 | 144.9719935 | Cers6         |
| ENSMUSG00000047434  | 2.60224637  | 1.379757557   | 1.28E-18 | 2.01E-17 | 403.593764 | 406.004978 | 537.686104 | 1154.632275 | 1117.22806  | 1226.136367 | Foxc2         |
| ENSMUSG00000029321  | 0.262943786 | -1.927173692  | 1.33E-18 | 2.10E-17 | 268.465919 | 235.776385 | 208.136556 | 60.06158918 | 62.30530815 | 65.33949002 | Slc10a6       |
| ENSMUSG00000086825  | 0.2528517   | -2.250157545  | 1.51E-18 | 2.37E-17 | 250.568191 | 310.129104 | 219.286729 | 54.88386597 | 67.42629239 | 53.08833564 | Gm15675       |
| ENSMUSG00000049988  | 0.111294729 | -3.167542831  | 1.57E-18 | 2.47E-17 | 171.818188 | 334.587235 | 292.382305 | 31.06633923 | 20.48393693 | 37.77439267 | Lrrc25        |
| ENSMUSG00000000275  | 0.286623906 | -1.802769152  | 1.64E-18 | 2.57E-17 | 1184.82959 | 1660.21795 | 208.26399  | 452.5330081 | 466.0095651 | 471.6694436 | Trim25        |
| ENSMUSG00000087484  | 3.840386537 | 1.941251526   | 1.67E-18 | 2.61E-17 | 98.8579579 | 61.6344907 | 79.2901166 | 293.0591334 | 322.6220066 | 290.9649165 | 290089D917Rik |
| ENSMUSG00000021036  | 0.447694763 | -1.159412653  | 1.76E-18 | 2.75E-17 | 1712.81256 | 1584.8869  | 1361.55997 | 719.7035255 | 704.9888292 | 662.583266  | Sptlc2        |
| ENSMUSG00000061107  | 0.127898555 | -2.57950311   | 1.78E-18 | 2.78E-17 | 1127.55686 | 1958.60175 | 1461.15043 | 304.6941869 | 256.0492116 | 164.3695466 | Retnla        |
| ENSMUSG00000090394  | 2.240450375 | 1.163788772   | 1.87E-18 | 2.91E-17 | 1272.52845 | 1175.94695 | 1526.33475 | 2984.439655 | 3081.97901  | 2831.037591 | 4930523C07Rik |
| ENSMUSG00000040428  | 0.366468453 | -1.448239083  | 1.94E-18 | 3.02E-17 | 933.36651  | 923.539035 | 764.406281 | 361.4050797 | 276.5331485 | 324.655591  | Plekha4       |
| ENSMUSG00000037754  | 0.404750166 | -1.340896422  | 2.03E-18 | 3.16E-17 | 540.511383 | 538.078877 | 482.023976 | 221.6065532 | 211.6673404 | 194.9975405 | Ppp1r16b      |
| ENSMUSG00000091971  | 4.108949379 | 2.038769557   | 2.04E-18 | 3.18E-17 | 442.073879 | 395.2434   | 499.279534 | 2093.871264 | 1240.131681 | 2156.203171 | Hspa1a        |
| ENSMUSG00000055805  | 0.230992558 | -2.114081723  | 2.05E-18 | 3.19E-17 | 439.38922  | 647.651315 | 405.122954 | 100.1231784 | 100.7126899 | 124.5534028 | Fmn1l         |
| ENSMUSG00000027692  | 3.156475849 | 1.658314713   | 2.33E-18 | 3.61E-17 | 260.411941 | 301.324177 | 199.4642   | 734.2011505 | 786.924577  | 888.2086924 | Tnik          |
| ENSMUSG00000030772  | 3.331661214 | 1.221358183   | 2.56E-18 | 3.97E-17 | 4070.8321  | 3053.3531  | 4007.86761 | 8431.404467 | 8893.442616 | 8628.8964   | Dkk3          |
| ENSMUSG00000039131  | 5.731082737 | 2.518807733   | 2.60E-18 | 4.03E-17 | 26.8465918 | 239.349755 | 32.2116099 | 198.8245711 | 164.7249928 | 140.882754  | Gipc2         |
| ENSMUSG00000030047  | 0.235492297 | -2.086248225  | 2.69E-18 | 4.16E-17 | 225.511372 | 338.500536 | 299.815754 | 66.27485703 | 66.57279501 | 70.44413768 | Arhgap25      |
| ENSMUSG00000021009  | 2.024590472 | 1.017630113   | 2.71E-18 | 4.19E-17 | 648.792637 | 632.976436 | 672.727083 | 1326.532685 | 1471.659135 | 1209.801495 | Ptpn21        |
| ENSMUSG00000076431  | 0.200803166 | -2.316146077  | 2.85E-18 | 4.41E-17 | 767.812527 | 797.335078 | 1356.60434 | 197.7890264 | 161.3110033 | 227.6672855 | Sox4          |
| ENSMUSG000000110071 | 5.868884732 | 2.553086373   | 3.17E-18 | 4.89E-17 | 27.7414783 | 31.306408  | 22.3003453 | 163.6160533 | 180.9414249 | 135.7836277 | Gm45512       |
| ENSMUSG00000021567  | 0.248607344 | -2.00805918   | 3.26E-18 | 5.02E-17 | 507.400586 | 370.785269 | 328.310639 | 105.6255534 | 93.03121354 | 102.0929532 | Nkd2          |
| ENSMUSG00000043085  | 13.10094763 | 3.711599265   | 3.28E-18 | 5.05E-17 | 25.9517055 | 11.739903  | 38.4061503 | 258.8861603 | 253.4887195 | 473.7113026 | Tmem82        |
| ENSMUSG00000031805  | 0.251647732 | -1.990522499  | 3.69E-18 | 5.68E-17 | 953.054011 | 782.660199 | 691.310705 | 241.2819014 | 148.5085427 | 222.5626379 | Jak3          |
| ENSMUSG00000004677  | 2.143857978 | 1.100209336   | 4.27E-18 | 6.55E-17 | 3339.71603 | 2827.35997 | 2798.69334 | 6964.037711 | 6438.784174 | 5823.382048 | Myo9b         |
| ENSMUSG00000003534  | 0.205231459 | 1.037404334   | 4.29E-18 | 6.58E-17 | 814.34662  | 758.202068 | 698.788521 | 1658.942515 | 1469.722475 | 1529.352438 | Ddr1          |
| ENSMUSG00000027322  | 0.172757828 | -2.533177011  | 4.54E-18 | 6.94E-17 | 318.579557 | 451.00794  | 241.587074 | 53.84832133 | 66.57272901 | 54.10926517 | Siglec1       |
| ENSMUSG00000044550  | 4.340868228 | 2.117983629   | 4.59E-18 | 7.02E-17 | 143.181823 | 82.1793209 | 154.863509 | 536.412124  | 567.5757524 | 542.1135812 | Icgal3        |
| ENSMUSG00000014158  | 0.425220571 | -1.233716704  | 4.97E-18 | 7.58E-17 | 475.184676 | 502.859178 | 514.14685  | 227.819821  | 199.718385  | 207.2486949 | Trpv4         |
| ENSMUSG00000073758  | 2.743438125 | 1.455985038   | 4.96E-18 | 7.58E-17 | 171.874438 | 138.922185 | 127.605131 | 382.1159725 | 391.7552937 | 406.3299539 | Sgcd321       |
| ENSMUSG00000036655  | 0.390384199 | -1.357033434  | 5.12E-18 | 7.80E-17 | 786.590923 | 403.070002 | 437.33455  | 163.6160533 | 166.4319875 | 148.0347821 | Clec11a       |
| ENSMUSG00000059326  | 0.257188067 | -1.95910439   | 5.17E-18 | 7.88E-17 | 388.394914 | 1065.3962  | 634.320933 | 237.1397228 | 237.1397228 | 213.3747271 | Cof2          |
| ENSMUSG0000001240   | 0.435268433 | -1.2000227    | 5.65E-18 | 8.60E-17 | 1805.88075 | 2060.35297 | 1787.74435 | 915.4214627 | 719.4982846 | 827.9738501 | Ramp2         |
| ENSMUSG00000038668  | 0.255481284 | -1.968710486  | 6.24E-18 | 9.49E-17 | 1468.50857 | 1490.96768 | 2386.13695 | 505.3457848 | 386.6340395 | 473.7113026 | Lpar1         |
| ENSMUSG00000033857  | 0.366998675 | -1.446153239  | 6.36E-18 | 9.66E-17 | 516.34945  | 490.14058  | 558.747541 | 215.3932853 | 163.8714954 | 196.0184701 | Engase        |
| ENSMUSG00000055632  | 0.237205954 | -2.075787871  | 6.38E-18 | 9.68E-17 | 3194.74443 | 2061.3313  | 2028.09251 | 649.2864899 | 432.7231676 | 647.269323  | Hmcn2         |
| ENSMUSG00000026228  | 0.196905763 | -2.344422759  | 6.47E-18 | 9.80E-17 | 341.846603 | 288.605948 | 219.286729 | 67.31040167 | 55.47732918 | 44.92089939 | Htr2b         |
| ENSMUSG00000024521  | 0.080192506 | -3.640388763  | 6.59E-18 | 9.98E-17 | 175.397733 | 215.231555 | 281.232132 | 7.248812487 | 17.92344481 | 28.58602688 | Maip1a        |
| ENSMUSG00000021457  | 0.35596534  | -1.490191323  | 6.62E-18 | 1.00E-16 | 914.573896 | 1137.79226 | 1058.02749 | 346.9074547 | 436.9906544 | 321.5942024 | Syk           |
| ENSMUSG00000078532  | 0.128108467 | -2.964562269  | 8.11E    |          |            |            |            |             |             |             |               |

|                    |              |              |          |          |            |            |            |  |             |             |             |            |
|--------------------|--------------|--------------|----------|----------|------------|------------|------------|--|-------------|-------------|-------------|------------|
| ENSMUSG00000038235 | 0.490089902  | -1.028881674 | 2.00E-17 | 2.93E-16 | 1499.8296  | 1788.37855 | 1681.19825 |  | 804.6181861 | 772.4151216 | 858.601736  | F11r       |
| ENSMUSG00000027833 | 0.348196978  | -1.522024414 | 2.08E-17 | 3.04E-16 | 914.573896 | 912.777475 | 1240.14698 |  | 384.1870618 | 319.2080171 | 364.4718428 | Shox2      |
| ENSMUSG00000030278 | 0.169974305  | -2.556611423 | 2.17E-17 | 3.18E-16 | 5798.86384 | 3095.42109 | 5900.91915 |  | 1164.987721 | 731.4472478 | 618.6832961 | Cldc       |
| ENSMUSG00000053411 | 2.150817422  | 1.104885063  | 2.18E-17 | 3.19E-16 | 834.034121 | 769.941971 | 717.327741 |  | 1533.641612 | 164.817028  | 1848.903382 | Cbx7       |
| ENSMUSG00000020108 | 0.358035268  | -1.481826387 | 2.30E-17 | 3.35E-16 | 1476.56255 | 1399.98343 | 1255.01388 |  | 428.7154814 | 605.1296367 | 444.1043462 | Ddit4      |
| ENSMUSG00000032656 | 3.381443423  | 3.371639215  | 2.35E-17 | 3.43E-16 | 187.926143 | 141.857161 | 157.341325 |  | 621.3267846 | 584.6456988 | 443.0834167 | 3-Mar      |
| ENSMUSG00000025877 | 0.100134159  | -3.319993891 | 2.36E-17 | 3.45E-16 | 210.298303 | 377.633546 | 239.109258 |  | 43.49287492 | 21.3374343  | 18.37673157 | Hk3        |
| ENSMUSG00000021792 | 2.856728675  | 1.514364019  | 2.44E-17 | 3.54E-16 | 927.997192 | 662.326193 | 1024.57698 |  | 2357.935148 | 2500.7473   | 2606.433094 | Fam213a    |
| ENSMUSG00000032243 | 0.097826473  | -3.353631257 | 2.44E-17 | 3.55E-16 | 1187.51425 | 642.759688 | 600.870415 |  | 120.1231784 | 40.96787385 | 77.5906444  | Iga11      |
| ENSMUSG00000029231 | 0.373729945  | -1.41993193  | 2.57E-17 | 3.73E-16 | 3656.50581 | 2775.50873 | 2818.51587 |  | 1218.836042 | 981.5219778 | 1258.806112 | Pdgfra     |
| ENSMUSG00000031112 | 3.381929006  | 1.757846375  | 2.71E-17 | 3.93E-16 | 81.434662  | 80.2226704 | 102.82937  |  | 295.1302227 | 328.5964882 | 265.4416782 | Stk26      |
| ENSMUSG00000031779 | 0.032698372  | -4.934637392 | 2.89E-17 | 4.19E-16 | 72.485798  | 135.98721  | 141.23552  |  | 3.106633923 | 5.974481604 | 2.041859063 | Ccl22      |
| ENSMUSG00000029217 | 0.358473042  | -1.480063465 | 2.91E-17 | 4.21E-16 | 389.275582 | 371.763594 | 333.266272 |  | 115.980998  | 136.5595795 | 139.8673458 | Tec        |
| ENSMUSG00000039058 | 0.23156881   | -2.110487146 | 3.20E-17 | 4.63E-16 | 219.247167 | 163.380317 | 189.552935 |  | 41.42178564 | 46.08885809 | 44.92089939 | Ak5        |
| ENSMUSG00000097240 | 21.08492605  | 4.398140057  | 3.20E-17 | 4.63E-16 | 5.36931837 | 5.86995149 | 1.23890807 |  | 84.91466056 | 89.61722406 | 101.0720236 | Gm26614    |
| ENSMUSG00000033538 | 0.395498674  | -1.338255236 | 3.21E-17 | 4.63E-16 | 138.366499 | 733.743936 | 726.000131 |  | 280.6325977 | 240.6862589 | 301.1742118 | Casp4      |
| ENSMUSG00000070691 | 0.141524994  | -2.820871228 | 3.22E-17 | 4.64E-16 | 615.127846 | 203.491652 | 244.06489  |  | 26.92416067 | 31.57940267 | 23.48137923 | Runx3      |
| ENSMUSG00000029661 | 0.286732888  | -1.802220704 | 3.29E-17 | 4.74E-16 | 161950.276 | 129536.133 | 232082.171 |  | 54853.83518 | 45776.47805 | 49493.64276 | Col1a2     |
| ENSMUSG00000029561 | 0.164300531  | -2.605590948 | 3.47E-17 | 4.99E-16 | 947.684693 | 2039.80814 | 1775.35527 |  | 220.5710085 | 215.0813777 | 347.1160407 | Oasl2      |
| ENSMUSG00000032735 | 0.371609534  | -1.428140579 | 3.47E-17 | 4.99E-16 | 529.772746 | 425.571483 | 535.208287 |  | 196.7534818 | 177.5274534 | 179.6835975 | Abilim3    |
| ENSMUSG00000024338 | 0.210964602  | -2.244927147 | 3.59E-17 | 5.16E-16 | 905.625032 | 1929.25739 | 1604.38595 |  | 325.1610173 | 297.8705828 | 313.4253662 | Psmb8      |
| ENSMUSG00000064225 | 5.934073045  | 2.569022686  | 3.60E-17 | 5.17E-16 | 136.917618 | 71.4177432 | 113.979543 |  | 630.6466864 | 457.4745914 | 825.931991  | Pagr9      |
| ENSMUSG00000027200 | 0.30165154   | -1.729045149 | 3.61E-17 | 5.18E-16 | 1037.17333 | 733.743936 | 333.43579  |  | 259.9217049 | 215.0813777 | 281.776507  | Sema6d     |
| ENSMUSG00000014329 | 0.321344798  | -1.637805978 | 3.82E-17 | 5.47E-16 | 4030.56832 | 4034.61333 | 5715.08294 |  | 1612.343006 | 1205.138289 | 1611.026801 | Gm1734     |
| ENSMUSG00000091387 | 0.192006352  | -2.380774059 | 3.90E-17 | 5.58E-16 | 318.579557 | 224.036482 | 193.269659 |  | 43.49287492 | 46.08885809 | 52.06740611 | Gcnt4      |
| ENSMUSG00000026605 | 0.314373263  | -1.669449571 | 3.97E-17 | 5.68E-16 | 218.35228  | 213.274904 | 214.331097 |  | 65.23931238 | 67.42629239 | 70.44413768 | Cenpf      |
| ENSMUSG00000028716 | 10.36826065  | 3.374101987  | 4.03E-17 | 5.75E-16 | 11.6335231 | 12.7182822 | 12.3890087 |  | 129.4430801 | 91.3242188  | 160.2859364 | Pdcl1p1    |
| ENSMUSG00000083457 | 11.14.354822 | 10.12199296  | 4.18E-17 | 5.96E-16 | 0          | 0          | 0          |  | 231.9619996 | 186.9159245 | 213.3742721 | Cyp4b1-ps2 |
| ENSMUSG00000017754 | 0.34354739   | -1.541418973 | 4.20E-17 | 5.98E-16 | 2408.13929 | 2262.8663  | 1759.24946 |  | 781.836204  | 603.422642  | 825.931991  | Pltp       |
| ENSMUSG00000028463 | 4.875952075  | 2.285683946  | 4.30E-17 | 6.12E-16 | 42.0596606 | 37.1763594 | 26.0170695 |  | 166.7226872 | 167.7694218 | 164.3696546 | Car9       |
| ENSMUSG00000053310 | 6.966413441  | 2.800416096  | 4.31E-17 | 6.12E-16 | 173.607961 | 196.643375 | 341.938628 |  | 1556.423595 | 1069.432207 | 2324.656543 | Nrgn       |
| ENSMUSG00000026581 | 5.131817964  | 2.359469996  | 4.32E-17 | 6.13E-16 | 78.7500028 | 122.290656 | 110.268618 |  | 564.3718294 | 659.5746904 | 369.5746904 | Sell       |
| ENSMUSG00000039899 | 2.163848729  | 1.113599647  | 4.37E-17 | 6.20E-16 | 5618.99168 | 5190.99377 | 4522.01447 |  | 10782.0908  | 12777.5597  | 10121.49538 | Fgl2       |
| ENSMUSG00000029468 | 0.328077209  | -1.607892721 | 4.41E-17 | 6.25E-16 | 702.48582  | 610.474955 | 499.279953 |  | 221.6065532 | 178.3809507 | 196.0184701 | P2rx7      |
| ENSMUSG00000030222 | 0.211707511  | -2.239855641 | 4.42E-17 | 6.26E-16 | 201.349439 | 180.990191 | 164.774754 |  | 48.67059813 | 34.99339275 | 32.66974501 | Rerg       |
| ENSMUSG00000029177 | 0.264716395  | -1.917480543 | 4.45E-17 | 6.30E-16 | 241.619327 | 287.627623 | 340.69972  |  | 67.31040167 | 77.66826085 | 84.73715112 | Cenpa      |
| ENSMUSG00000085419 | 4.373825252  | 2.128717453  | 4.69E-17 | 6.63E-16 | 46.5340926 | 34.2413837 | 49.5563229 |  | 170.8648658 | 200.5718824 | 196.0184701 | Gm11734    |
| ENSMUSG00000031778 | 0.409238357  | -1.288986723 | 4.75E-17 | 6.70E-16 | 844.772757 | 749.39714  | 672.727083 |  | 280.6325977 | 320.9150119 | 326.6974501 | Cx3cl1     |
| ENSMUSG00000025950 | 0.477725897  | -1.06574501  | 5.24E-17 | 7.38E-16 | 2437.67054 | 1952.7372  | 2123.92873 |  | 1103.890587 | 1054.069254 | 997.4481523 | Idh1       |
| ENSMUSG00000026822 | 0.158195141  | -2.660222811 | 5.26E-17 | 7.41E-16 | 233.948875 | 556.667066 | 608.48811  |  | 78.70139272 | 47.79585247 | 62.27670142 | Pdnr       |
| ENSMUSG00000064262 | 0.322429421  | -1.632944702 | 5.27E-17 | 7.41E-16 | 598.678999 | 544.927163 | 470.785068 |  | 159.4738747 | 208.2535588 | 152.1185002 | Gimap8     |
| ENSMUSG00000110631 | 0.194608133  | -2.361356093 | 5.48E-17 | 7.71E-16 | 1295.7955  | 1163.22872 | 977.498469 |  | 254.7439817 | 130.5850979 | 284.8393393 | Gm2047     |
| ENSMUSG00000004317 | 0.3519552    | -1.506536294 | 5.56E-17 | 7.80E-16 | 356.164785 | 294.4759   | 333.266272 |  | 114.9454552 | 109.2476636 | 122.5115438 | Cln5       |
| ENSMUSG00000044562 | 0.434989876  | -1.200946272 | 6.09E-17 | 8.54E-16 | 1122.18754 | 1265.95287 | 1473.0617  |  | 573.6917311 | 504.2638365 | 564.5740309 | Rasip1     |
| ENSMUSG00000031838 | 0.373010729  | -1.427210968 | 6.33E-17 | 8.87E-16 | 1280.58243 | 1870.55788 | 1723.32113 |  | 615.1135168 | 593.1806735 | 609.4949303 | Ifi30      |
| ENSMUSG00000071203 | 0.212806234  | -2.232387681 | 6.63E-17 | 9.29E-16 | 228.196031 | 286.649298 | 183.358395 |  | 54.88386597 | 45.23536071 | 49.00461751 | Naip5      |
| ENSMUSG00000025232 | 0.440677225  | -1.182205759 | 6.64E-17 | 9.29E-16 | 3819.37514 | 4327.13257 | 5067.13402 |  | 2064.876014 | 1793.197979 | 1964.268419 | Hexa       |
| ENSMUSG00000060572 | 0.207483007  | -2.268934911 | 6.98E-17 | 9.76E-16 | 1186.61936 | 897.124253 | 1188.09599 |  | 258.8861603 | 258.6097037 | 306.2788595 | Mfap2      |
| ENSMUSG00000021866 | 3.554815619  | 1.829774732  | 7.81E-17 | 1.09E-15 | 640.738659 | 533.187261 | 455.655352 |  | 1753.177077 | 1821.363392 | 1837.673157 | Axa11      |
| ENSMUSG00000097451 | 0.281462566  | -1.828985038 | 7.93E-17 | 1.11E-15 | 3788.949   | 2482.98948 | 4364.67314 |  | 1134.956927 | 922.6306591 | 936.1923804 | Rian       |
| ENSMUSG00000074227 | 2.293526195  | 1.197567385  | 8.16E-17 | 1.14E-15 | 901.1506   | 1098.65925 | 1235.19135 |  | 2422.138915 | 2550.250147 | 2439.000651 | Spint2     |
| ENSMUSG00000006403 | 0.14844868   | -2.751963828 | 8.45E-17 | 1.18E-15 | 227.301144 | 128.160608 | 187.075119 |  | 23.81752674 | 29.01891065 | 27.56509735 | Adamt5     |
| ENSMUSG00000033953 | 2.152313149  | 1.106034249  | 8.54E-17 | 1.19E-15 | 3447.1024  | 2618.97669 | 2796.21552 |  | 6232.943194 | 6355.994929 | 6492.090891 | Cistn1     |
| ENSMUSG00000027639 | 0.319534519  | -1.645956301 | 8.94E-17 | 1.24E-15 | 2877.05976 | 4801.62032 | 4268.03831 |  | 1310.999516 | 1304.143984 | 1201.634059 | Samhd1     |
| ENSMUSG00000024251 | 2.639943551  | 1.400507081  | 8.95E-17 | 1.24E-15 | 377.642059 | 387.773207 | 387.773207 |  | 910.2437395 | 931.1656328 | 899.4389173 | Nptr       |
| ENSMUSG00000029084 | 0.201752246  | -2.309343358 | 9.09E-17 | 1.26E-15 | 346.321035 | 486.227649 | 550.075184 |  | 110.8032766 | 103.273182  | 64.31856049 | Cd38       |
| ENSMUSG00000002325 | 0.409783318  | -1.28706684  | 9.13E-17 | 1.27E-15 | 1028.22447 | 1301.17258 | 1294.65894 |  | 446.3197403 | 536.849847  | 500.2554704 | Ifi9       |
| ENSMUSG00000025780 | 0.359310461  | -1.476697158 | 9.39E-17 | 1.30E-15 | 2343.70747 | 1869.57955 | 2182.95602 |  | 907.1371055 | 618.7855947 | 773.8645849 | Irf5       |
| ENSMUSG00000026321 | 2.049012245  | 1.034928606  | 9.71E-17 | 1.35E-15 | 425.965924 | 395.2434   | 365.477881 |  | 783.9072933 | 39.841414   | 811.6389776 | Tnfrsf11a  |
| ENSMUSG00000034786 | 0.231381715  | -2.111653234 | 9.81E-17 | 1.36E-15 | 351.690353 | 561.558693 | 593.436967 |  | 118.0520891 | 129.7316005 | 100.0510941 | Gpsm3      |
| ENSMUSG00000041361 | 0.350342586  | -1.513161728 | 1.02E-16 | 1.41E-15 | 374.062513 | 335.56556  | 304.771386 |  | 129.4430801 | 113.5151505 | 113.323178  | Myzap      |
| ENSMUSG00000024972 | 0.150610775  | -2.731103111 | 1.03E-16 | 1.43E-15 | 812.556847 | 373.70245  | 590.959151 |  | 115.980998  | 66.57279501 | 85.75808065 | Igfbp6     |
| ENSMUSG00000023046 | 0.327456177  | -1.610626247 | 1.05E-16 | 1.45E-15 | 3730.78138 | 3826.23005 | 4882.53671 |  | 1598.880926 | 1048.094773 | 1427.259485 | Lgals12    |
| ENSMUSG00000069769 | 2.138220328  | 1.09641052   | 1.08E-16 | 1.48E-15 | 723.068207 | 920.604059 | 800.334615 |  | 1669.297961 | 1831.60536  | 1723.329049 | Msi2       |
| ENSMUSG00000022186 | 2.158911666  | 1.110304215  | 1.19E-16 | 1.64E-15 | 5460.59678 | 5689.93965 | 6975.05245 |  | 12703.02611 | 14120.26052 | 12299.13807 | Oxct1      |
| ENSMUSG00000070880 | 25.73814541  | 4.685836197  | 1.23E-16 | 1.70E-15 | 0.8948864  | 3.91330099 | 11.1501727 |  | 105.6255534 | 123.7571189 | 153.1394297 | Gad1       |
| ENSMUSG00000019230 | 0.072404534  |              |          |          |            |            |            |  |             |             |             |            |

|                     |             |              |          |          |            |            |             |             |             |             |               |
|---------------------|-------------|--------------|----------|----------|------------|------------|-------------|-------------|-------------|-------------|---------------|
| ENSMUSG00000018169  | 0.295850698 | -1.757058796 | 2.67E-16 | 3.59E-15 | 631.789795 | 433.398085 | 667.771451  | 178.1136783 | 157.0435164 | 177.6417385 | Mfng          |
| ENSMUSG00000007888  | 0.335666317 | -1.574900318 | 2.77E-16 | 3.71E-15 | 1147.24436 | 999.848404 | 1442.089    | 432.8576599 | 336.2779646 | 435.93691   | Crrf1         |
| ENSMUSG000000042821 | 0.191712244 | -2.382985615 | 2.78E-16 | 3.72E-15 | 251.463077 | 183.925147 | 246.542706  | 46.59950885 | 30.72590539 | 54.10926517 | Sna1          |
| ENSMUSG00000003559  | 0.248526911 | -2.008526014 | 2.82E-16 | 3.78E-15 | 251.463077 | 348.283789 | 412.556388  | 81.80802664 | 84.49623982 | 84.73715112 | Smagp         |
| ENSMUSG00000027408  | 0.232880456 | -2.102338525 | 2.84E-16 | 3.80E-15 | 2653.33816 | 1635.75982 | 2393.5704   | 637.8954989 | 361.0293883 | 558.4484537 | Cpxm1         |
| ENSMUSG00000006599  | 3.795119986 | 1.924145498  | 2.86E-16 | 3.81E-15 | 45.6392062 | 44.0246362 | 50.795231   | 167.7582318 | 170.6994744 | 192.9556815 | Mir23b        |
| ENSMUSG00000030638  | 0.125790988 | -2.990899525 | 2.97E-16 | 3.97E-15 | 115.440345 | 110.550753 | 120.174083  | 10.35544641 | 11.94896321 | 21.43952016 | Sh3g3         |
| ENSMUSG000000042348 | 0.491902308 | -1.02355627  | 2.99E-16 | 3.98E-15 | 667.585251 | 600.691703 | 633.082025  | 313.7700262 | 312.3800381 | 309.3416481 | Arl15         |
| ENSMUSG000000034738 | 0.264912073 | -1.916414502 | 3.00E-16 | 3.99E-15 | 198.66478  | 173.163569 | 166.013682  | 47.63505349 | 45.23536071 | 50.02554704 | Ncmstrn       |
| ENSMUSG000000050910 | 0.450038786 | -1.15187875  | 3.02E-16 | 4.02E-15 | 635.369341 | 577.211897 | 677.682716  | 303.4145798 | 270.5586669 | 276.671903  | Cdr2l         |
| ENSMUSG000000050103 | 0.25099096  | -1.994292692 | 3.30E-16 | 4.39E-15 | 414.332401 | 306.215803 | 325.832823  | 67.42629239 | 90.09238377 | 106.1766713 | Agmo          |
| ENSMUSG000000030527 | 2.307513735 | 1.206339235  | 3.37E-16 | 4.48E-15 | 1078.33811 | 956.802093 | 1276.07531  | 2399.356933 | 2439.295489 | 2796.325987 | Crtc3         |
| ENSMUSG00000027514  | 0.090228868 | -3.470267098 | 3.42E-16 | 4.54E-15 | 269.360805 | 933.322287 | 703.699785  | 40.386241   | 64.0123029  | 67.38134908 | Zbp1          |
| ENSMUSG000000038151 | 0.066948566 | -3.900803041 | 3.44E-16 | 4.57E-15 | 71.5909116 | 112.507404 | 131.324256  | 7.248812487 | 8.53497372  | 5.104647658 | Prdm1         |
| ENSMUSG00000028849  | 2.115008603 | 1.080663531  | 3.48E-16 | 4.61E-15 | 3141.94613 | 4114.836   | 3978.13382  | 7819.397584 | 7806.086964 | 8131.703719 | Map7d1        |
| ENSMUSG000000045092 | 0.439489486 | -1.186099442 | 3.67E-16 | 4.86E-15 | 2118.1961  | 1891.10271 | 1766.68291  | 832.5778914 | 961.0380408 | 744.2576285 | S1pr1         |
| ENSMUSG000000060470 | 0.188925501 | -2.404110643 | 3.69E-16 | 4.88E-15 | 292.627811 | 240.668011 | 183.358399  | 57.9904999  | 38.7953222  | Adgrg3      |               |
| ENSMUSG000000052353 | 0.020368242 | -5.617534749 | 3.72E-16 | 4.92E-15 | 97.5426171 | 83.1576461 | 244.06489   | 3.413989488 | 3.413989488 | 2.041859063 | Cemp          |
| ENSMUSG000000054000 | 2.265797947 | 1.180019215  | 3.93E-16 | 5.20E-15 | 182.556825 | 197.6217   | 193.269559  | 418.360035  | 425.8951886 | 454.3136415 | Tusc1         |
| ENSMUSG00000072621  | 0.062671926 | -3.996036861 | 4.03E-16 | 5.32E-15 | 77.8551164 | 92.9408986 | 89.2013812  | 7.248812487 | 6.827978976 | 2.041859063 | Slfm10-ps     |
| ENSMUSG000000068263 | 0.172098069 | -2.538697184 | 4.04E-16 | 5.33E-15 | 159.289778 | 128.160608 | 122.651899  | 28.99524995 | 19.63043956 | 22.46044969 | Efccl1        |
| ENSMUSG000000047844 | 82.16846016 | 6.360512826  | 4.10E-16 | 5.40E-15 | 0          | 2.93497575 | 1.23890807  | 113.9099105 | 109.2476636 | 112.3022485 | Bex4          |
| ENSMUSG00000028494  | 0.36907732  | -1.43800501  | 4.41E-16 | 5.81E-15 | 2107.45746 | 2373.41705 | 2960.99029  | 891.6039359 | 802.2875297 | 1052.578347 | Plin2         |
| ENSMUSG00000017830  | 0.164142044 | -2.606983273 | 4.42E-16 | 5.81E-15 | 215.667621 | 447.094639 | 392.733859  | 53.84832133 | 52.06339699 | 67.38134908 | Dhx58         |
| ENSMUSG000000031950 | 3.360170781 | 1.74853456   | 4.56E-16 | 6.00E-15 | 760.653436 | 869.731146 | 833.785133  | 3047.607879 | 3319.25128  | 1911.180083 | Gabarapl2     |
| ENSMUSG000000039167 | 0.314534895 | -1.668708016 | 4.67E-16 | 6.13E-15 | 1559.78699 | 1056.59127 | 1003.51554  | 413.1823118 | 355.9084041 | 370.5974199 | Adgrl4        |
| ENSMUSG00000020533  | 0.346528613 | -1.528953616 | 4.83E-16 | 6.33E-15 | 921.732987 | 728.85231  | 761.928465  | 328.2676512 | 229.5907931 | 279.7346916 | Ebf2          |
| ENSMUSG000000037032 | 2.498644654 | 1.321145742  | 4.83E-16 | 6.33E-15 | 597.784112 | 494.054251 | 411.31748   | 1262.328917 | 1226.475724 | 1275.140985 | Appb1         |
| ENSMUSG000000038781 | 0.337600053 | -1.566612965 | 4.88E-16 | 6.39E-15 | 355.269899 | 398.178376 | 344.416444  | 140.8340712 | 102.4196864 | 128.637121  | Stab2         |
| ENSMUSG00000024640  | 0.300266219 | -1.735685918 | 4.91E-16 | 6.43E-15 | 442.073879 | 326.760633 | 366.88689   | 119.0876337 | 124.6106163 | 133.7417686 | Psat1         |
| ENSMUSG000000038486 | 3.984097427 | 1.994252928  | 4.91E-16 | 6.43E-15 | 144.971596 | 88.0492724 | 99.1126458  | 414.2178564 | 394.3157858 | 519.6531315 | Sv2a          |
| ENSMUSG000000042363 | 2.204677026 | 1.140567323  | 5.10E-16 | 6.67E-15 | 1884.63075 | 1520.31744 | 1473.0612   | 3828.408538 | 3279.9904   | 3652.885864 | Lgalsl        |
| ENSMUSG00000026141  | 3.115745755 | 1.639577514  | 5.38E-16 | 7.03E-15 | 94.8579579 | 87.0709471 | 79.2901166  | 299.2724013 | 241.5397563 | 276.671903  | Col19a1       |
| ENSMUSG000000043629 | 0.262045296 | -1.932111881 | 5.69E-16 | 7.43E-15 | 229.985804 | 286.649298 | 349.372076  | 81.80802664 | 74.25427136 | 70.44413768 | 1700019D03Rik |
| ENSMUSG00000027940  | 0.460201121 | -1.119663598 | 6.05E-16 | 7.88E-15 | 5136.64791 | 6232.91016 | 6879.65563  | 2945.088959 | 2778.987443 | 2672.793514 | Tpm3          |
| ENSMUSG000000040649 | 10.99022728 | 3.458149317  | 6.16E-16 | 8.01E-15 | 5.36931837 | 8.80492724 | 12.3890807  | 85.9502052  | 93.88471092 | 104.1348122 | Rimkb         |
| ENSMUSG000000030798 | 0.243209474 | -2.039728665 | 6.22E-16 | 8.10E-15 | 315.000011 | 456.877891 | 343.177536  | 88.02129449 | 110.9546584 | 71.46506721 | Cd37          |
| ENSMUSG00000026875  | 0.291410618 | -1.778874651 | 6.48E-16 | 8.42E-15 | 377.642059 | 568.406969 | 464.590527  | 142.9051605 | 150.2155375 | 117.4068961 | Traf1         |
| ENSMUSG000000055407 | 2.159046875 | 1.110394566  | 6.53E-16 | 8.48E-15 | 873.409122 | 685.805999 | 726.000131  | 1565.743497 | 1748.816115 | 1622.257026 | Map6          |
| ENSMUSG000000031605 | 0.474488061 | -1.075556308 | 7.00E-16 | 9.08E-15 | 729.324212 | 631.998111 | 682.638481  | 341.7297315 | 319.208071  | 309.3416481 | Kh12          |
| ENSMUSG000000031750 | 0.270906461 | -2.266006297 | 7.05E-16 | 9.14E-15 | 218.35228  | 200.556676 | 302.29357   | 60.06158918 | 40.11437692 | 50.02554704 | I134          |
| ENSMUSG000000042225 | 0.342122635 | -1.547414538 | 7.16E-16 | 9.27E-15 | 377.642059 | 458.834542 | 537.686048  | 157.4027854 | 152.7760266 | 159.2650069 | Amncm1        |
| ENSMUSG000000037447 | 2.442749248 | 1.288505776  | 7.47E-16 | 9.67E-15 | 808.977301 | 739.613888 | 893.25272   | 2117.688791 | 1641.275446 | 2204.186859 | Arid5a        |
| ENSMUSG00000022479  | 0.069615398 | -3.844449734 | 7.92E-16 | 1.02E-14 | 89.4886395 | 66.5261169 | 92.9181054  | 5.177723205 | 5.974481604 | 6.125577189 | Vdr           |
| ENSMUSG000000070348 | 0.371752416 | -1.427585977 | 8.23E-16 | 1.06E-14 | 1533.83528 | 1556.51547 | 1308.28692  | 672.068472  | 484.7865073 | 479.8368798 | Ccncl1        |
| ENSMUSG000000110408 | 43.34610475 | 5.437830448  | 8.41E-16 | 1.09E-14 | 0.8948864  | 1.9566505  | 3.71672422  | 79.73693736 | 90.47072143 | 96.98830549 | Gm45881       |
| ENSMUSG000000000938 | 0.469304387 | -1.091404148 | 9.31E-16 | 1.20E-14 | 715.909116 | 667.21782  | 690.071796  | 356.2273565 | 294.4565933 | 323.6346651 | Hoxa10        |
| ENSMUSG000000020176 | 0.39265365  | -1.348670788 | 9.31E-16 | 1.20E-14 | 4478.01152 | 3438.81325 | 4749.97355  | 1856.731541 | 1667.733865 | 1448.699005 | Grb10         |
| ENSMUSG000000036867 | 2.33289842  | 1.22212349   | 9.66E-16 | 1.24E-14 | 518.139223 | 435.354736 | 412.556388  | 1088.357418 | 950.7960724 | 1153.650371 | Smad6         |
| ENSMUSG00000026697  | 0.143678803 | -2.799080855 | 9.78E-16 | 1.26E-14 | 400.909105 | 259.256191 | 299.815754  | 54.88386597 | 24.75142339 | 59.21391283 | Myoc          |
| ENSMUSG00000023926  | 826.9247269 | 9.6916122    | 1.03E-15 | 1.33E-14 | 0.8948864  | 0          | 0           | 238.1752674 | 367.0038699 | 307.299789  | Rhag          |
| ENSMUSG000000034245 | 2.641732455 | 1.401484363  | 1.05E-15 | 1.34E-14 | 241.619327 | 228.928108 | 184.597303  | 512.5945973 | 361.5880553 | 591.1181988 | Hdac11        |
| ENSMUSG000000020176 | 0.294926932 | -1.761570523 | 1.08E-15 | 1.39E-14 | 536.931837 | 792.443451 | 535.208287  | 159.4738747 | 196.3043956 | 193.976611  | Dock2         |
| ENSMUSG00000027966  | 0.01141783  | -6.45256764  | 1.10E-15 | 1.42E-14 | 216.62508  | 430.463109 | 742.105936  | 16.56871426 | 15.3629527  | 6.125577189 | Col11a1       |
| ENSMUSG000000032322 | 0.212753128 | -2.202551146 | 1.20E-15 | 1.53E-14 | 326.63534  | 630.04146  | 571.136621  | 117.0165444 | 107.5406689 | 107.1976008 | Pstpip1       |
| ENSMUSG00000072620  | 0.183834374 | -2.443521541 | 1.30E-15 | 1.66E-14 | 827.769916 | 1892.08103 | 1850.92866  | 312.7344816 | 289.3356091 | 237.8765808 | Sfn2          |
| ENSMUSG000000049872 | 2.10059783  | 1.070799977  | 1.33E-15 | 1.69E-14 | 572.727293 | 467.639469 | 467.068343  | 1085.250784 | 1049.801768 | 1036.243474 | Fam26e        |
| ENSMUSG000000005161 | 2.292105163 | 1.196673237  | 1.37E-15 | 1.74E-14 | 2409.03418 | 2876.27623 | 3143.07909  | 6131.459819 | 7174.498919 | 6396.123515 | Prdx2         |
| ENSMUSG000000068245 | 0.337214751 | -1.568260448 | 1.56E-15 | 1.99E-14 | 551.25002  | 736.678912 | 524.058115  | 220.5710085 | 209.9603535 | 180.7045271 | Phf1d         |
| ENSMUSG000000031700 | 0.3134233   | -1.673815659 | 1.59E-15 | 2.02E-14 | 672.059683 | 973.433622 | 787.945534  | 263.0283388 | 206.546364  | 294.0277051 | Gpt2          |
| ENSMUSG00000023947  | 0.261093188 | -1.937363279 | 1.71E-15 | 2.17E-14 | 261.306827 | 363.936992 | 328.310639  | 101.4833748 | 67.42629239 | 80.65343299 | Nfkbie        |
| ENSMUSG000000030852 | 3.274386904 | 1.711224802  | 1.71E-15 | 2.17E-14 | 1208.99152 | 2238.40817 | 1658.89791  | 5505.990856 | 5738.916329 | 5473.203219 | Tacc2         |
| ENSMUSG00000024593  | 0.075756353 | -3.722489307 | 1.94E-15 | 2.46E-14 | 157.970006 | 128.160608 | 139.996612  | 20.71089282 | 6.827978976 | 5.104647658 | Mgf10         |
| ENSMUSG00000024590  | 0.312810894 | -1.676637339 | 1.95E-15 | 2.47E-14 | 327.528421 | 455.895956 | 483.174148  | 127.3719908 | 131.4385953 | 136.8045572 | Lmnbl         |
| ENSMUSG000000035021 | 0.240243717 | -2.057429395 | 1.99E-15 | 2.52E-14 | 707.855139 | 1109.42083 | 1390.05486  | 255.7795263 | 290.1891065 | 223.5835674 | Baz1a         |
| ENSMUSG000000043855 | 46.05191355 | 5.525189199  | 2.00E-15 | 2.52E-14 | 0.8948864  | 0.97832525 | 4.955632259 | 101.4833748 | 110.101161  | 74.5278558  | Ankrd45       |
| ENSMUSG00000073412  | 0.148994773 | -2.746666376 | 2.01E-15 | 2.53E-14 | 178.977279 | 315.02073  | 382.822594  | 51.77723205 | 34.13989488 | 44.92089939 | Lst1          |
| ENSMUSG000000041479 | 2.130519137 | 1.09120501   | 2.01E-15 | 2.53E-14 | 656.846614 | 623.193183 | 615.737312  | 1177.414257 | 1510.690348 | 135         |               |

|                     |              |              |          |          |             |            |             |  |             |             |              |               |
|---------------------|--------------|--------------|----------|----------|-------------|------------|-------------|--|-------------|-------------|--------------|---------------|
| ENSMUSG00000037037  | 0.316710433  | -1.658763703 | 4.12E-15 | 5.08E-14 | 1378.12505  | 1141.70557 | 983.69301   |  | 418.360035  | 281.6541327 | 411.4346012  | Slco2b1       |
| ENSMUSG00000038811  | 0.305227267  | -1.712044244 | 4.17E-15 | 5.13E-14 | 419.701719  | 661.347868 | 626.887485  |  | 181.2203122 | 167.2854849 | 172.5370908  | Gngt2         |
| ENSMUSG00000031304  | 0.262678706  | -1.928628842 | 4.22E-15 | 5.19E-14 | 421.491492  | 688.740975 | 552.555     |  | 146.0117944 | 171.5529718 | 118.4278257  | Il2rg         |
| ENSMUSG00000059824  | 2.096583939  | 1.068040591  | 4.43E-15 | 5.45E-14 | 2813.52283  | 2758.8772  | 2526.13356  |  | 6593.312729 | 5208.404964 | 5182.238302  | Dbp           |
| ENSMUSG00000052821  | 0.212106658  | -2.237138184 | 4.90E-15 | 6.01E-14 | 163.76421   | 167.293618 | 123.890807  |  | 36.24406244 | 28.16541327 | 32.66974501  | Cysltr1       |
| ENSMUSG00000045103  | 3.16890213   | 1.663983103  | 4.99E-15 | 6.12E-14 | 1980.38359  | 1481.18443 | 1102.62818  |  | 4817.35367  | 5214.015445 | 4441.043462  | Dmd           |
| ENSMUSG00000024990  | 3.420459654  | 1.774190213  | 5.12E-15 | 6.28E-14 | 731.122185  | 479.379372 | 868.474559  |  | 2400.392478 | 2054.368174 | 2651.353993  | Rbp4          |
| ENSMUSG00000022253  | 2.996612558  | 1.583332565  | 5.20E-15 | 6.37E-14 | 344.531262  | 387.416798 | 258.931787  |  | 891.6039359 | 909.8281985 | 1174.068961  | Nadk2         |
| ENSMUSG00000044349  | 0.17965874   | -2.476668974 | 5.46E-15 | 6.69E-14 | 2.476668974 | 137.94386  | 163.535866  |  | 23.81752674 | 19.63043956 | 33.69067454  | Snhg11        |
| ENSMUSG00000071454  | 2.507976406  | 1.326523776  | 5.71E-15 | 6.99E-14 | 148.551142  | 156.53204  | 125.129715  |  | 380.0448833 | 350.7874199 | 352.2206884  | Dtnb          |
| ENSMUSG00000031990  | 2.302848633  | 1.203419585  | 5.75E-15 | 7.03E-14 | 702.48582   | 565.471994 | 791.662258  |  | 1563.672408 | 1655.784902 | 1518.122213  | Jam3          |
| ENSMUSG00000043157  | 0.153021761  | -2.70819126  | 5.90E-15 | 7.21E-14 | 104.701708  | 138.922185 | 131.324256  |  | 25.88861603 | 14.50945532 | 17.35580204  | Arl11         |
| ENSMUSG00000040339  | 0.481908098  | -1.053170051 | 5.93E-15 | 7.24E-14 | 2188.89212  | 1700.32928 | 2026.85361  |  | 988.9451322 | 952.5030671 | 909.6482126  | Fam102b       |
| ENSMUSG00000086918  | 3.263869574  | 1.706583407  | 5.96E-15 | 7.27E-14 | 76.96023    | 119.35568  | 96.6348297  |  | 307.5567584 | 340.5454514 | 306.2788595  | 4930429F24Rik |
| ENSMUSG00000040430  | 0.335779742  | -1.574412903 | 6.12E-15 | 7.46E-14 | 688.167638  | 956.802093 | 978.737377  |  | 315.8411155 | 244.9537458 | 320.5718729  | Pitpnc1       |
| ENSMUSG00000031162  | 82.67874808  | 6.36944638   | 6.20E-15 | 7.55E-14 | 1.78977279  | 0.97832525 | 1.23890807  |  | 90.09238377 | 93.03121354 | 153.1394297  | Gata1         |
| ENSMUSG00000036295  | 13.17618303  | 3.719860596  | 6.37E-15 | 7.75E-14 | 43.8494334  | 27.393107  | 40.8839664  |  | 271.3126959 | 296.1635881 | 909.6482126  | Lrrn3         |
| ENSMUSG00000028197  | 0.037610668  | -4.732714269 | 6.40E-15 | 7.78E-14 | 115.440345  | 142.835486 | 81.7679328  |  | 9.319901769 | 0.853497332 | 3.062788595  | Col24a1       |
| ENSMUSG00000031934  | 0.236901523  | -2.077640622 | 6.49E-15 | 7.90E-14 | 276.519896  | 405.026653 | 446.006963  |  | 110.8032766 | 76.81476348 | 79.63250346  | Panx1         |
| ENSMUSG00000048387  | 2.449746055  | 1.292632205  | 6.51E-15 | 7.91E-14 | 1031.80401  | 1004.74003 | 1430.93882  |  | 2902.631629 | 2679.128251 | 2904.544517  | Osr1          |
| ENSMUSG00000021268  | 0.272435868  | -1.876011437 | 6.64E-15 | 8.06E-14 | 11424.1197  | 9964.24266 | 18951.5768  |  | 4057.263904 | 3261.213458 | 3671.262595  | Meg3          |
| ENSMUSG00000067201  | 0.24069313   | -2.053078664 | 6.65E-15 | 8.07E-14 | 508.295473  | 485.249323 | 307.249292  |  | 127.3719908 | 93.03121354 | 93.9255169   | Edt-M9        |
| ENSMUSG00000106847  | 2.203195721  | 1.139597663  | 6.73E-15 | 8.16E-14 | 146.13641   | 1169.09867 | 1056.78859  |  | 2800.112709 | 2586.097037 | 2711.5588169 | Ped3          |
| ENSMUSG0000005338   | 2.3028782594 | -1.822234772 | 6.92E-15 | 8.38E-14 | 735.596617  | 651.564616 | 475.7407    |  | 121.2511068 | 143.3875585 | 173.5580204  | Cadm3         |
| ENSMUSG00000000031  | 0.01622273   | -5.945839571 | 7.22E-15 | 8.74E-14 | 4493.22459  | 15867.4572 | 5774.55053  |  | 256.815071  | 83.64274245 | 83.71622159  | H19           |
| ENSMUSG00000079523  | 0.275258504  | -1.86114096  | 7.23E-15 | 8.75E-14 | 4514.70186  | 6827.73191 | 9244.73204  |  | 1920.935309 | 1835.01935  | 1910.159153  | Tmsb10        |
| ENSMUSG00000071347  | 0.339974785  | -1.595048715 | 7.34E-15 | 8.87E-14 | 466.235812  | 472.531095 | 350.616984  |  | 164.6515979 | 132.2920927 | 141.9092049  | Cttnf9        |
| ENSMUSG00000032548  | 0.482587801  | -1.051136647 | 7.41E-15 | 8.95E-14 | 1786.19325  | 2180.68698 | 2112.33826  |  | 1069.717614 | 899.5862301 | 964.7784073  | Slco2a1       |
| ENSMUSG00000023868  | 0.225683533  | -2.147626937 | 7.43E-15 | 8.97E-14 | 165.553983  | 136.965535 | 137.518796  |  | 39.35069636 | 30.72590539 | 29.60695641  | Pde10a        |
| ENSMUSG00000022579  | 0.295119773  | -1.760627508 | 7.83E-15 | 9.43E-14 | 355.269899  | 324.803983 | 452.201447  |  | 132.5497141 | 108.3941662 | 92.90458737  | Gphbp1        |
| ENSMUSG00000097183  | 2.045845748  | 1.032697373  | 8.55E-15 | 1.03E-13 | 277.414783  | 245.559637 | 270.08196   |  | 551.9452937 | 532.5823601 | 538.0298631  | Gm17501       |
| ENSMUSG00000024049  | 3.139498556  | 1.650534149  | 8.57E-15 | 1.03E-13 | 6779.65933  | 10675.4851 | 6044.63249  |  | 24524.80373 | 25051.10036 | 24206.23919  | Myom1         |
| ENSMUSG00000097084  | 4.413229216  | 2.141834681  | 9.03E-15 | 1.09E-13 | 25.9517055  | 36.1980342 | 40.8839664  |  | 149.1184283 | 145.9480506 | 155.1812888  | Foxl1         |
| ENSMUSG00000059013  | 0.383405641  | -1.383056532 | 9.19E-15 | 1.10E-13 | 461.76138   | 484.270998 | 428.662193  |  | 195.7179372 | 155.0945532 | 187.8510338  | Shd23c        |
| ENSMUSG00000028873  | 0.16246302   | -2.621816724 | 9.27E-15 | 1.11E-13 | 102.017049  | 141.857161 | 157.341325  |  | 20.71089282 | 25.60492116 | 18.37673157  | Cdc8a         |
| ENSMUSG00000060743  | 2.521834012  | 1.33447332   | 9.63E-15 | 1.15E-13 | 3550.90922  | 3101.29104 | 2285.78539  |  | 7774.869165 | 7366.535817 | 7407.864681  | H3f3a         |
| ENSMUSG00000079560  | 3.020086982  | 1.594590101  | 1.01E-14 | 1.21E-13 | 241.619327  | 185.881797 | 147.430061  |  | 566.4429186 | 565.0152602 | 612.5577189  | Hoxa3         |
| ENSMUSG00000038188  | 0.424981077  | -1.234529492 | 1.03E-14 | 1.23E-13 | 612.102294  | 747.44049  | 666.532543  |  | 324.1254726 | 262.0236932 | 275.6509735  | Scarf1        |
| ENSMUSG00000032511  | 0.376595968  | -3.356088879 | 1.06E-14 | 1.26E-13 | 122.599436  | 81.2009596 | 80.5290247  |  | 10.35544641 | 10.24196846 | 7.146506721  | Scn5a         |
| ENSMUSG00000024290  | 2.369572447  | 1.24462677   | 1.21E-14 | 1.45E-13 | 4023.40923  | 4415.18185 | 5620.92593  |  | 11911.87001 | 11588.78732 | 9806.02815   | Rock1         |
| ENSMUSG00000004626  | 0.38184949   | -1.388923998 | 1.22E-14 | 1.46E-13 | 317.377854  | 449.051289 | 452.201447  |  | 150.1539729 | 151.9253272 | 183.7673157  | Stxbp2        |
| ENSMUSG00000036918  | 0.475677637  | -1.071943894 | 1.25E-14 | 1.50E-13 | 816.136393  | 902.994205 | 1001.03772  |  | 457.7107313 | 432.7231676 | 402.2462354  | Ttc7          |
| ENSMUSG00000042129  | 0.379749774  | -1.396878988 | 1.26E-14 | 1.50E-13 | 919.048328  | 1247.36469 | 909.358525  |  | 366.5828029 | 434.4301623 | 366.5137018  | Rassf4        |
| ENSMUSG00000039798  | 3.892414151  | 1.960665221  | 1.30E-14 | 1.55E-13 | 39.3750014  | 36.1980342 | 38.4061503  |  | 135.656348  | 159.6040086 | 148.0347821  | 2600006K01Rik |
| ENSMUSG00000031170  | 66.1308757   | 9.368719208  | 1.31E-14 | 1.56E-13 |             | 0          | 0           |  | 110.8032766 | 127.1711084 | 136.8045572  | Slc38a5       |
| ENSMUSG00000027221  | 0.170231027  | -2.554434086 | 1.32E-14 | 1.57E-13 | 578.096611  | 436.333061 | 782.989902  |  | 149.1184283 | 89.61722406 | 67.38134908  | Chst1         |
| ENSMUSG00000031636  | 3.210128904  | 1.68263123   | 1.33E-14 | 1.58E-13 | 2085.98019  | 3749.92068 | 2358.88097  |  | 9036.162538 | 8625.444441 | 8646.252202  | Pdlm3         |
| ENSMUSG00000052698  | 0.42445635   | -1.236311897 | 1.33E-14 | 1.59E-13 | 1210.78129  | 1320.73909 | 999.798815  |  | 552.9808383 | 545.6466124 | 497.1926819  | Tln2          |
| ENSMUSG00000001333  | 5.047474515  | 2.335496838  | 1.36E-14 | 1.61E-13 | 174.502847  | 186.860122 | 76.8123005  |  | 768.3741236 | 789.4850691 | 663.6041955  | Sync          |
| ENSMUSG00000054793  | 0.340362933  | -1.554854166 | 1.42E-14 | 1.69E-13 | 358.849445  | 328.717284 | 294.860121  |  | 127.3719908 | 93.03121354 | 115.36503174 | Cadm4         |
| ENSMUSG00000022102  | 0.191561223  | -2.384122542 | 1.43E-14 | 1.70E-13 | 217.457394  | 450.029614 | 410.078572  |  | 71.45258023 | 67.42629239 | 67.38134908  | Dok2          |
| ENSMUSG00000060224  | 0.248743496  | -2.007269291 | 1.44E-14 | 1.71E-13 | 352.58524   | 253.386239 | 240.348166  |  | 82.84357128 | 57.18432392 | 71.46506271  | Pyroxd2       |
| ENSMUSG00000066861  | 0.026194849  | -5.254573049 | 1.44E-14 | 1.71E-13 | 75.170572   | 264.147181 | 151.146785  |  | 4.142178564 | 0.853497372 | 8.167436252  | Oas1g         |
| ENSMUSG00000032076  | 0.250425665  | -1.99754567  | 1.51E-14 | 1.79E-13 | 324.843762  | 381.546847 | 385.300411  |  | 126.3364462 | 75.10776873 | 72.48599674  | Cadm1         |
| ENSMUSG00000039982  | 0.313054854  | -1.675512626 | 1.52E-14 | 1.79E-13 | 812.556867  | 968.541996 | 1246.34152  |  | 296.1657673 | 269.7051685 | 381.8276448  | Dtx4          |
| ENSMUSG00000012889  | 0.090087729  | -3.472525583 | 1.53E-14 | 1.80E-13 | 66.2215933  | 94.8975491 | 85.484657   |  | 9.319901769 | 6.827978976 | 6.125577189  | Podnl1        |
| ENSMUSG00000034457  | 0.252277738  | -1.986915194 | 1.53E-14 | 1.80E-13 | 272.045464  | 269.039443 | 213.092188  |  | 78.70139272 | 64.86580027 | 46.96275845  | Eda2r         |
| ENSMUSG00000026981  | 0.048929705  | -4.353145617 | 1.59E-14 | 1.87E-13 | 750.375466  | 399.460812 | 26.92416067 |  | 11.94896321 | 21.43952016 | 11.94896321  | Col13a1       |
| ENSMUSG00000027832  | 0.08396462   | -3.574074633 | 1.67E-14 | 1.97E-13 | 120.809663  | 240.668011 | 426.184377  |  | 20.71089282 | 24.75142309 | 20.41859063  | Ptx3          |
| ENSMUSG00000046491  | 2.162727036  | 1.11285159   | 1.69E-14 | 1.99E-13 | 757.073891  | 606.561654 | 791.662258  |  | 1535.712703 | 1461.187517 | 1662.073277  | Cttnf2        |
| ENSMUSG00000022180  | 0.258331699  | -1.952703414 | 1.85E-14 | 2.17E-13 | 217.457394  | 317.955706 | 327.071731  |  | 86.98574985 | 67.42629239 | 68.40227861  | Slc7a8        |
| ENSMUSG00000027331  | 0.19204196   | -2.380506527 | 1.88E-14 | 2.20E-13 | 129.758527  | 202.513326 | 201.942016  |  | 27.95970531 | 38.40738174 | 35.7325336   | Knstrn        |
| ENSMUSG00000032577  | 0.511713353  | -2.168214245 | 1.90E-14 | 2.23E-13 | 474.28979   | 509.707455 | 452.201447  |  | 227.819821  | 175.820458  | 193.976611   | Mapkapk3      |
| ENSMUSG00000051735  | 0.222315152  | -2.169321816 | 1.97E-14 | 2.31E-13 | 171.818188  | 287.627623 | 210.614372  |  | 45.5639642  | 51.20984232 | 52.06740611  | Rln1          |
| ENSMUSG00000053398  | 0.310724268  | -1.686293171 | 2.00E-14 | 2.34E-13 | 805.397756  | 490.14095  | 743.344844  |  | 204.0022943 | 209.9603535 | 219.4998493  | Phgdh         |
| ENSMUSG000000085162 | 6.208783304  | 2.63431058   | 2.02E-14 | 2.36E-13 | 133.4232959 | 28.3714322 | 22.3003453  |  | 122.1942676 | 144.2410559 | 128.637121   | Gm12295       |

|                    |              |              |          |          |            |            |             |              |              |             |               |
|--------------------|--------------|--------------|----------|----------|------------|------------|-------------|--------------|--------------|-------------|---------------|
| ENSMUSG00000027500 | 0.468796429  | -1.092966514 | 3.78E-14 | 4.32E-13 | 599.573885 | 551.77544  | 496.802137  | 263.0283388  | 252.6352221  | 258.2951715 | Stmn2         |
| ENSMUSG00000063568 | 2.3927280831 | 1.258386758  | 3.96E-14 | 4.52E-13 | 140.497164 | 143.813812 | 147.430061  | 351.0496333  | 367.8573673  | 312.4044366 | Jazf1         |
| ENSMUSG00000051906 | 0.203957796  | -2.293657444 | 4.06E-14 | 4.63E-13 | 124.389209 | 187.838448 | 153.624601  | 34.17297315  | 62.4541853   | 34.71160407 | Cd209f        |
| ENSMUSG00000020889 | 2.771106426  | 1.470462119  | 4.07E-14 | 4.64E-13 | 1830.93756 | 2173.8387  | 3005.59098  | 7096.587425  | 26.6807317   | 6108.221387 | NrlId1        |
| ENSMUSG00000070056 | 2.282727674  | 1.190758759  | 4.16E-14 | 4.73E-13 | 683.693206 | 722.982359 | 944.047951  | 1829.807381  | 1854.649789  | 1673.303502 | Mfhas1        |
| ENSMUSG00000025978 | 2.262369109  | 1.177834327  | 4.28E-14 | 4.87E-13 | 633.579568 | 470.574445 | 559.986449  | 1142.205739  | 1281.099555  | 1342.522334 | Rfn2          |
| ENSMUSG00000039217 | 0.120493427  | -3.052973648 | 4.33E-14 | 4.92E-13 | 81.434662  | 114.464054 | 127.607531  | 17.6042589   | 9.388471092  | 12.25115438 | IlI8          |
| ENSMUSG00000039208 | 0.333900246  | -1.58251094  | 4.53E-14 | 5.15E-13 | 652.372182 | 911.799132 | 1044.39951  | 276.4904192  | 271.4121643  | 322.613732  | Metrln        |
| ENSMUSG00000052397 | 0.409853028  | -1.286821439 | 4.58E-14 | 5.19E-13 | 515.454564 | 700.480878 | 607.064956  | 245.4240799  | 261.1701958  | 239.9184399 | Ezr           |
| ENSMUSG00000088789 | 51.59646631  | 5.689199799  | 4.60E-14 | 5.22E-13 | 1.78977279 | 0          | 3.71672422  | 110.8032766  | 85.3497372   | 69.42320814 | Scarna13      |
| ENSMUSG00000069515 | 0.108524877  | -3.203902304 | 4.71E-14 | 5.33E-13 | 288.153419 | 739.613888 | 346.89426   | 72.48812487  | 45.23536071  | 31.64881548 | Lyz1          |
| ENSMUSG00000032344 | 0.234120467  | -2.094677034 | 4.94E-14 | 5.59E-13 | 140.497164 | 201.535001 | 209.375464  | 45.5639642   | 44.38186334  | 38.7953222  | Mb21d1        |
| ENSMUSG00000053318 | 0.037526531  | -4.735945259 | 4.94E-14 | 5.59E-13 | 62.6420477 | 270.017769 | 133.802072  | 7.248812487  | 4.26748686   | 6.125577189 | Slamf8        |
| ENSMUSG00000027955 | 2.10266023   | 1.072215743  | 5.03E-14 | 5.69E-13 | 3008.60806 | 2284.38946 | 2434.45436  | 5749.343847  | 5524.688489  | 4978.052396 | Fam198b       |
| ENSMUSG00000063060 | 0.369694566  | -1.435594258 | 5.13E-14 | 5.79E-13 | 460.866494 | 400.135027 | 340.69972   | 161.544964   | 146.801548   | 136.8045572 | Sox7          |
| ENSMUSG00000090257 | 4.587246986  | 2.197628587  | 5.13E-14 | 5.79E-13 | 34.9005694 | 35.219709  | 21.0614372  | 134.6208033  | 145.9480506  | 142.9301344 | Gm4524        |
| ENSMUSG00000029271 | 0.489695923  | -1.030041909 | 5.20E-14 | 5.87E-13 | 1141.87504 | 1216.05828 | 1292.18112  | 601.6514364  | 524.9008838  | 661.5623364 | Ifnar2        |
| ENSMUSG00000022367 | 0.094252216  | -3.40732965  | 5.27E-14 | 5.93E-13 | 153.025574 | 110.550753 | 133.802072  | 20.71089282  | 5.120984232  | 12.25115438 | Has2          |
| ENSMUSG00000027368 | 0.208679945  | -2.260636133 | 5.30E-14 | 5.96E-13 | 155.86462  | 205.448032 | 235.392534  | 47.63505349  | 41.82137123  | 32.66974501 | Dusp2         |
| ENSMUSG00000026979 | 0.24312644   | -2.040221303 | 5.43E-14 | 6.11E-13 | 200.454553 | 309.150779 | 239.109258  | 53.84832133  | 73.40077399  | 54.10926517 | Ps4d          |
| ENSMUSG00000026556 | 0.297305384  | -1.749982507 | 5.58E-14 | 6.28E-13 | 172.713074 | 200.556676 | 223.003453  | 61.09713382  | 52.91683706  | 63.29763095 | VangI2        |
| ENSMUSG00000047414 | 0.31075619   | -1.686144966 | 5.77E-14 | 6.49E-13 | 1324.43187 | 871.687797 | 833.785133  | 353.1207226  | 317.5010224  | 271.5672554 | Flnt2         |
| ENSMUSG00000087543 | 0.316295803  | 1.667345274  | 5.78E-14 | 6.49E-13 | 101.122163 | 83.1576461 | 79.2901166  | 269.2416067  | 326.0359961  | 244.002158  | Gm16576       |
| ENSMUSG00000000197 | 3.61551347   | 1.854200551  | 5.99E-14 | 6.72E-13 | 282.784101 | 155.553715 | 167.25259   | 736.72272398 | 774.1221164  | 685.0437157 | Nalcn         |
| ENSMUSG00000033688 | 88.96303308  | 6.475134071  | 6.17E-14 | 6.92E-13 | 0.8948864  | 1.9566505  | 1.23890807  | 125.3009016  | 62.30530815  | 175.5998794 | 1300017I02Rik |
| ENSMUSG00000033208 | 0.42183888   | -1.245236024 | 6.18E-14 | 6.92E-13 | 513.664791 | 527.317309 | 579.808978  | 245.4240799  | 192.0369087  | 247.0649466 | S100b         |
| ENSMUSG00000074793 | 0.468374571  | -1.094265343 | 6.70E-14 | 7.50E-13 | 1192.88357 | 1233.66814 | 1281.03095  | 680.3528292  | 524.0473864  | 532.9252151 | Hspa12b       |
| ENSMUSG00000024989 | 0.10390701   | -3.266635104 | 6.87E-14 | 7.68E-13 | 85.909094  | 99.7891754 | 70.61177601 | 6.213267846  | 11.94896321  | 8.167436252 | Cep55         |
| ENSMUSG00000006445 | 0.380093339  | -1.395574354 | 7.26E-14 | 8.11E-13 | 333.792625 | 268.061118 | 283.709949  | 112.8743659  | 111.8081557  | 112.3022485 | Epha2         |
| ENSMUSG00000020423 | 2.692910925  | 1.42916651   | 7.38E-14 | 8.24E-13 | 2755.35521 | 2674.74123 | 308.705186  | 9532.188421  | 6610.337146  | 8460.443028 | Btg2          |
| ENSMUSG00000025586 | 0.428551014  | -1.222461143 | 7.66E-14 | 8.54E-13 | 1462.24437 | 1170.077   | 1194.30738  | 628.5755971  | 482.2260152  | 530.8833564 | Cpeb1         |
| ENSMUSG00000021130 | 2.388873944  | 1.50531879   | 8.00E-14 | 8.90E-13 | 955.89492  | 815.923257 | 1359.08216  | 2733.837852  | 3175.863721  | 2941.29798  | Glatin16      |
| ENSMUSG00000091649 | 0.128473455  | -2.960457795 | 8.01E-14 | 8.91E-13 | 142.869937 | 380.568522 | 334.50518   | 42.45733028  | 34.99339225  | 32.66974501 | Phf11b        |
| ENSMUSG00000025964 | 0.201193858  | -2.313341831 | 8.16E-14 | 9.08E-13 | 468.025585 | 271.974419 | 293.621213  | 78.70139272  | 49.50284757  | 80.65343299 | Adam23        |
| ENSMUSG00000025492 | 0.424929307  | -1.234705247 | 8.27E-14 | 9.19E-13 | 5470.44054 | 7734.63942 | 7180.71119  | 2886.062915  | 2585.24354   | 3191.425716 | Ifitm3        |
| ENSMUSG00000034723 | 2.129699357  | 1.090649784  | 8.56E-14 | 9.50E-13 | 978.11083  | 869.731146 | 719.80559   | 1775.959059  | 1930.611055  | 1768.249949 | Tmx4          |
| ENSMUSG00000033610 | 3.068992284  | 1.302595738  | 8.98E-14 | 9.97E-13 | 108.281254 | 82.1793209 | 81.7679327  | 250.6018031  | 272.2656617  | 307.299789  | Pank1         |
| ENSMUSG00000018417 | 0.38582914   | -1.373965985 | 9.19E-14 | 1.02E-12 | 909.204578 | 636.889737 | 784.22881   | 304.4501245  | 268.8516722  | 326.6974501 | Myo1b         |
| ENSMUSG00000030546 | 0.243586705  | -2.037492703 | 9.46E-14 | 1.05E-12 | 3784.47457 | 1898.92931 | 2854.4442   | 881.2484895  | 547.9453128  | 651.3530411 | Plin1         |
| ENSMUSG00000047867 | 0.409946825  | -1.286491307 | 9.46E-14 | 1.05E-12 | 975.421671 | 888.319326 | 693.788521  | 352.0851779  | 370.4178594  | 326.6974501 | Gimap6        |
| ENSMUSG00000028644 | 1.52266829   | 3.526903666  | 9.70E-14 | 1.07E-12 | 4.84886395 | 7.82660199 | 13.6279888  | 78.70139272  | 164.7249928  | 101.0720236 | Ermap         |
| ENSMUSG00000027834 | 3.205777721  | 1.680674397  | 9.93E-14 | 1.10E-12 | 853.707402 | 352.19709  | 260.170695  | 1261.293373  | 1199.768088  | 964.7784073 | Serpin1       |
| ENSMUSG00000019850 | 0.355002143  | -1.494100362 | 1.01E-13 | 1.12E-12 | 470.710244 | 625.149834 | 470.785068  | 173.9714997  | 215.0813377  | 166.4115136 | TrnfaiP3      |
| ENSMUSG00000025461 | 0.063657683  | -3.973521548 | 1.03E-13 | 1.14E-12 | 76.96023   | 106.637452 | 76.8123005  | 4.142178564  | 2.560492126  | 10.20929532 | Cd1631        |
| ENSMUSG00000032419 | 2.456777219  | 1.29676704   | 1.04E-13 | 1.14E-12 | 572.727293 | 562.537018 | 773.078637  | 1446.655864  | 1762.4727013 | 1471.159453 | Tzfp568       |
| ENSMUSG00000022799 | 0.432617585  | -1.208835785 | 1.05E-13 | 1.15E-12 | 2205.89496 | 1761.96377 | 1713.40986  | 933.0257216  | 803.141027   | 722.8181083 | Arhgap31      |
| ENSMUSG00000031453 | 0.485215241  | -1.043303227 | 1.05E-13 | 1.16E-12 | 2256.90349 | 1921.43079 | 2107.38263  | 1111.1394    | 874.8348063  | 1065.850431 | Rasa3         |
| ENSMUSG00000015396 | 0.169160316  | -2.563536937 | 1.06E-13 | 1.17E-12 | 207.013644 | 350.240439 | 385.300411  | 44.52841956  | 74.25427136  | 39.81625173 | Cd83          |
| ENSMUSG00000097993 | 0.069869748  | -3.839188261 | 1.09E-13 | 1.20E-12 | 174.502847 | 70.4394179 | 96.6348297  | 6.213267846  | 9.388471092  | 8.167436252 | Ptpvr         |
| ENSMUSG00000019943 | 0.476516838  | -1.069400902 | 1.18E-13 | 1.30E-12 | 3544.64501 | 4109.94437 | 4606.26021  | 2081.444728  | 2028.763253  | 1730.477556 | Atp2b1        |
| ENSMUSG00000029866 | 254.2220511  | 7.989945364  | 1.18E-13 | 1.30E-12 | 0          | 0          | 2.47781615  | 143.9407051  | 139.973569   | 239.9184399 | Kel           |
| ENSMUSG00000034919 | 6.186369684  | 2.629093048  | 1.21E-13 | 1.33E-12 | 18.7926143 | 17.6098545 | 18.5836211  | 114.9454552  | 87.91022931  | 137.8254868 | Ttc22         |
| ENSMUSG00000029438 | 2.636961776  | 1.398876659  | 1.28E-13 | 1.40E-12 | 386.590923 | 263.169492 | 268.843052  | 794.2627397  | 950.936879   | 782.032021  | Bcl7a         |
| ENSMUSG00000067149 | 0.4040823863 | -4.614443486 | 1.36E-13 | 1.48E-12 | 1005.85231 | 2385.15696 | 2042.95941  | 88.02129449  | 104.9801768  | 28.58602688 | Jchain        |
| ENSMUSG00000037868 | 0.251712424  | -1.990151669 | 1.40E-13 | 1.53E-12 | 364.218763 | 383.503497 | 438.573458  | 126.3364462  | 64.0123209   | 109.2394599 | Egr2          |
| ENSMUSG00000032118 | 2.208666772  | 1.143175771  | 1.41E-13 | 1.54E-12 | 182.556825 | 203.491652 | 168.491498  | 421.466689   | 409.6787385  | 396.1206582 | Fez1          |
| ENSMUSG00000044216 | 0.171252766  | -2.545800806 | 1.42E-13 | 1.56E-12 | 175.397733 | 157.510365 | 116.457359  | 31.06633923  | 17.0699474   | 29.60695641 | Sgsm1         |
| ENSMUSG00000074221 | 2.243470775  | 1.16573239   | 1.43E-13 | 1.56E-12 | 431.335243 | 449.051289 | 332.027635  | 929.9190876  | 941.4076013  | 854.5180179 | Tzfp568       |
| ENSMUSG00000075028 | 2.074140285  | 1.052513475  | 1.46E-13 | 1.59E-12 | 240.72444  | 208.383278 | 235.392534  | 459.7818206  | 480.5190204  | 478.8159503 | Pdrn11        |
| ENSMUSG00000048279 | 3.091927582  | 1.628506529  | 1.53E-13 | 1.67E-12 | 809.872188 | 646.672989 | 463.351619  | 2034.84522   | 2218.23967   | 1690.659304 | Sacs          |
| ENSMUSG00000086712 | 0.047528599  | -4.395060323 | 1.58E-13 | 1.72E-12 | 76.0653436 | 70.4394179 | 75.5733924  | 6.213267846  | 4.26748686   | 0           | AI427809      |
| ENSMUSG00000043061 | 2.047949443  | 1.034180101  | 1.63E-13 | 1.77E-12 | 774.971618 | 704.394179 | 619.454036  | 1291.324167  | 1509.836851  | 1501.787341 | Tmem18        |
| ENSMUSG00000055676 | 5.154137333  | 2.365730979  | 1.64E-13 | 1.78E-12 | 18.7926143 | 18.5881797 | 21.0614372  | 93.19901769  | 101.5661873  | 105.1557417 | Gm5069        |
| ENSMUSG00000022146 | 0.488680578  | -1.033036326 | 1.70E-13 | 1.84E-12 | 2683.7643  | 2187.53526 | 2108.62154  | 1225.04931   | 1066.018218  | 1122.001555 | Osmr          |
| ENSMUSG00000024673 | 2.018884573  | 4.335486524  | 1.72E-13 | 1.86E-12 | 4.84886395 | 8.80492724 | 8.67235651  | 118.0520891  | 330.303483   | 84.73715112 | Msa41         |
| ENSMUSG00000001083 | 0.433173074  | -1.206984528 | 1.76E-13 | 1.90E-12 | 523.508541 | 533.187261 | 655.38237   | 256.815071   | 226.1768036  | 258.2951715 | Nrlh3         |
| ENSMUSG00000017716 | 0.155394624  | -2.685991506 | 1.84E-13 | 2.00E-12 | 117.230118 | 175.12022  | 252.737247  | 25.88861603  | 29.87240802  | 28.58602688 | Birc5         |
| ENSMUSG00000028194 | 0.169883534  | -2.557382067 | 1.93E-13 | 2.09E-12 | 679.218774 | 558.623717 | 752.0172    | 119.0876337  | 55.47739128  | 164.3696546 | Ddah1</       |

|                     |              |              |          |          |            |            |             |             |              |             |         |
|---------------------|--------------|--------------|----------|----------|------------|------------|-------------|-------------|--------------|-------------|---------|
| ENSMUSG00000028654  | 0.125647012  | -2.992551734 | 4.00E-13 | 4.25E-12 | 69.8011388 | 74.3527189 | 79.2901166  | 9.319901769 | 7.681476348  | 11.23022485 | Mycl    |
| ENSMUSG00000023274  | 0.172726706  | -2.533436933 | 4.08E-13 | 4.33E-12 | 138.707391 | 178.055195 | 185.836211  | 21.74643746 | 42.6748686   | 21.43952016 | Cd4     |
| ENSMUSG00000040466  | 2.239031456  | 1.162874797  | 4.11E-13 | 4.36E-12 | 599.573885 | 749.39714  | 816.44042   | 1667.226872 | 1734.30666   | 1440.531569 | Blvrb   |
| ENSMUSG00000044177  | 3.329019604  | 1.735097366  | 4.20E-13 | 4.45E-12 | 54.5880701 | 54.7862139 | 58.2286739  | 157.4027854 | 209.106561   | 189.892829  | Wffkn2  |
| ENSMUSG00000022667  | 0.060987177  | -4.035350241 | 4.38E-13 | 4.63E-12 | 74.2755708 | 142.835486 | 120.174083  | 3.106633923 | 12.80246058  | 4.083718126 | Cd200r1 |
| ENSMUSG00000031344  | 9.648592307  | 3.270318474  | 4.49E-13 | 4.75E-12 | 11.6335231 | 6.84827674 | 12.3890087  | 124.2653569 | 103.273182   | 68.40227861 | Gabrq   |
| ENSMUSG00000040624  | 0.337399049  | -1.567472187 | 4.58E-13 | 4.84E-12 | 591.519907 | 442.203012 | 436.095642  | 199.8601157 | 145.0945532  | 152.1185002 | PlekHg1 |
| ENSMUSG00000062488  | 0.200518532  | -2.31819252  | 4.70E-13 | 4.97E-12 | 313.210238 | 734.722262 | 515.385758  | 120.1231784 | 90.47072143  | 103.1138827 | Ifit3b  |
| ENSMUSG00000016262  | 0.338184746  | -1.564116509 | 4.71E-13 | 4.97E-12 | 1256.4205  | 786.5735   | 935.375595  | 382.1159725 | 289.3356091  | 336.9067454 | Sertad4 |
| ENSMUSG00000026683  | 0.177677212  | -2.492669438 | 4.73E-13 | 4.98E-12 | 102.017049 | 108.594103 | 139.996612  | 26.92416067 | 16.21645007  | 19.3976611  | Ncf2    |
| ENSMUSG00000057182  | 0.14269838   | -2.808959141 | 4.73E-13 | 4.98E-12 | 269.360805 | 134.030559 | 136.279888  | 30.03079459 | 24.75142379  | 22.46044969 | Scn3a   |
| ENSMUSG00000048776  | 0.361294151  | -1.468754195 | 4.78E-13 | 5.04E-12 | 301.576715 | 366.871968 | 358.044433  | 148.0828837 | 111.8081557  | 111.2813189 | Pthlh   |
| ENSMUSG00000035441  | 0.209817693  | 1.021350159  | 4.83E-13 | 5.07E-12 | 2002.75575 | 1545.75389 | 1523.85693  | 3510.496333 | 3323.518766  | 3468.097619 | Myo1d   |
| ENSMUSG00000040612  | 0.423445154  | -1.239752974 | 4.83E-13 | 5.07E-12 | 1232.25857 | 996.913428 | 903.163985  | 484.634892  | 393.4622885  | 450.2299234 | Ildr2   |
| ENSMUSG00000043384  | 2.12266902   | 1.085879434  | 5.06E-13 | 5.31E-12 | 1153.50856 | 850.164641 | 888.297088  | 2055.556112 | 2087.654572  | 2000.000952 | Gprasp1 |
| ENSMUSG000000010175 | 0.203731401  | -2.295259738 | 5.08E-13 | 5.33E-12 | 866.250031 | 535.143911 | 623.170761  | 170.8648658 | 79.37525559  | 163.348725  | Prox1   |
| ENSMUSG00000026483  | 2.399502246  | 1.262735163  | 5.16E-13 | 5.42E-12 | 5978.73601 | 4568.77891 | 3857.95974  | 12089.98368 | 11705.71646  | 10777.95306 | Fam129a |
| ENSMUSG00000002699  | 0.296185482  | -1.755427169 | 5.18E-13 | 5.43E-12 | 296.207397 | 451.986265 | 418.750929  | 93.19901769 | 121.1966268  | 130.67898   | Lcp2    |
| ENSMUSG00000034810  | 0.300465862  | -1.37472701  | 5.56E-13 | 5.82E-12 | 2724.03419 | 1674.89283 | 1952.519312 | 736.2722398 | 471.1305493  | 702.3995177 | Scn7a   |
| ENSMUSG00000056492  | 0.312621205  | -1.677512457 | 5.58E-13 | 5.84E-12 | 6810.08547 | 5329.91595 | 3545.7549   | 1833.949559 | 1567.021175  | 1503.8292   | Adgrf5  |
| ENSMUSG00000028664  | 0.298553896  | -1.7439367   | 5.75E-13 | 6.02E-12 | 468.920471 | 318.934031 | 418.750929  | 126.3364462 | 93.88471092  | 140.8882754 | Ephb2   |
| ENSMUSG00000029082  | 0.207803374  | -2.266709017 | 5.85E-13 | 6.12E-12 | 272.045464 | 456.877891 | 327.071731  | 98.3767409  | 50.35634495  | 71.46506721 | Bst1    |
| ENSMUSG00000021451  | 0.246297956  | -2.021525196 | 5.89E-13 | 6.15E-12 | 405.383537 | 757.223742 | 418.750929  | 124.2653569 | 130.5850979  | 134.762682  | Sema4d  |
| ENSMUSG00000070327  | 0.387908386  | -1.366212128 | 5.97E-13 | 6.24E-12 | 2431.40634 | 2907.58264 | 1841.0174   | 895.7461145 | 863.7393404  | 1027.055109 | Rnf213  |
| ENSMUSG00000022105  | 2.184026621  | 1.126990441  | 6.09E-13 | 6.35E-12 | 783.920482 | 638.846387 | 561.225357  | 1507.752997 | 1468.868977  | 1362.940925 | Rb1     |
| ENSMUSG00000022235  | 0.409825776  | -1.28691737  | 6.18E-13 | 6.45E-12 | 348.110808 | 336.543886 | 385.300411  | 158.4383301 | 125.4641137  | 155.1812888 | Cmb1    |
| ENSMUSG00000030162  | 0.274777277  | -1.86368928  | 6.26E-13 | 6.52E-12 | 206.718757 | 158.48869  | 153.624601  | 46.59950885 | 52.06333969  | 43.8996986  | Olrl1   |
| ENSMUSG00000032572  | 0.123264154  | -3.020174782 | 6.26E-13 | 6.52E-12 | 120.809663 | 84.1359714 | 87.9624732  | 12.42653569 | 16.21645007  | 7.146506721 | Col6a4  |
| ENSMUSG00000041556  | 5.652160007  | 2.498802308  | 6.28E-13 | 6.54E-12 | 34.9005694 | 14.6748787 | 34.689426   | 150.1539729 | 164.7249928  | 159.2650069 | Fbxo2   |
| ENSMUSG00000026785  | 0.491538076  | -1.024624918 | 6.37E-13 | 6.63E-12 | 1964.27564 | 2166.0121  | 1953.75803  | 1166.023266 | 919.2166696  | 906.585424  | Pkm3    |
| ENSMUSG00000010529  | 0.101913799  | -3.294578693 | 6.40E-13 | 6.65E-12 | 100.227276 | 120.334006 | 204.419832  | 17.6042589  | 7.681476348  | 18.37673157 | Gm266   |
| ENSMUSG00000001517  | 0.263956229  | -1.291629382 | 6.49E-13 | 6.73E-12 | 144.971596 | 197.6217   | 146.191153  | 42.45733028 | 41.82137123  | 44.92089939 | Foxm1   |
| ENSMUSG00000034949  | 2.225241752  | 1.15396208   | 6.58E-13 | 6.83E-12 | 247.883532 | 189.795098 | 216.808913  | 494.9903384 | 471.1305493  | 492.0880342 | Zfr2    |
| ENSMUSG00000042215  | 2.28854969   | 1.194433617  | 6.69E-13 | 6.93E-12 | 168.238642 | 187.838448 | 146.191153  | 395.5780529 | 386.6343095  | 370.5974199 | Bag2    |
| ENSMUSG00000023322  | 0.36234468   | -3.982912064 | 6.69E-13 | 6.94E-12 | 82.329548  | 297.410876 | 128.84644   | 13.46208033 | 7.681476348  | 11.23022485 | Serinc2 |
| ENSMUSG00000037979  | 4.997373595  | 2.321170075  | 6.85E-13 | 7.09E-12 | 34.005683  | 38.1546847 | 40.8839664  | 168.7937765 | 140.8270664  | 254.2114533 | Cdc92   |
| ENSMUSG00000026395  | 0.374081869  | -1.418574053 | 6.89E-13 | 7.13E-12 | 1606.32108 | 2228.62492 | 1408.63848  | 598.5448025 | 712.67030106 | 650.3321116 | Ptpcr   |
| ENSMUSG00000001156  | 2.230768414  | 1.157540749  | 6.90E-13 | 7.14E-12 | 393.750014 | 497.967552 | 473.262884  | 914.385918  | 974.6939988  | 1153.650371 | Mxd1    |
| ENSMUSG00000034040  | 0.213473646  | -2.227870118 | 6.98E-13 | 7.22E-12 | 279.204555 | 277.844371 | 436.095642  | 83.87911592 | 46.94235546  | 81.67436252 | Gaint17 |
| ENSMUSG00000053519  | 5.446559791  | 2.445371756  | 7.05E-13 | 7.28E-12 | 19.6875002 | 20.5448302 | 27.2559776  | 101.4833748 | 111.8081557  | 151.0975707 | Kcnip1  |
| ENSMUSG00000019890  | 0.220432652  | -2.181590156 | 7.06E-13 | 7.29E-12 | 181.661938 | 179.033521 | 287.426673  | 45.5639642  | 40.11437648  | 57.17205377 | Nts     |
| ENSMUSG00000060429  | 5.8296045    | 2.428398826  | 7.20E-13 | 7.43E-12 | 156.605119 | 88.0497224 | 54.5119552  | 545.7320258 | 579.5247156  | 495.1508228 | Sntb1   |
| ENSMUSG00000109635  | 4.552932565  | 2.186796091  | 7.30E-13 | 7.52E-12 | 35.7954558 | 37.1763594 | 19.8225292  | 133.5852587 | 148.5085427  | 145.992923  | Gm45670 |
| ENSMUSG00000031209  | 0.290811409  | -1.781844226 | 7.30E-13 | 7.53E-12 | 441.178993 | 374.69857  | 261.409603  | 114.9454552 | 98.15219778  | 101.0720236 | Heph    |
| ENSMUSG00000009772  | 0.198115103  | -2.35589229  | 7.62E-13 | 7.85E-12 | 134.232959 | 231.863084 | 229.197993  | 47.63505349 | 32.66974501  | 32.66974501 | NuaK2   |
| ENSMUSG00000026890  | 0.28870031   | -1.792355441 | 7.67E-13 | 7.90E-12 | 346.321035 | 445.137988 | 381.583686  | 142.9051605 | 116.0756426  | 79.63250346 | Lhx6    |
| ENSMUSG00000061232  | 0.329459491  | -1.601669371 | 7.72E-13 | 7.94E-12 | 13250.5829 | 25051.9746 | 17647.0066  | 6667.871944 | 5780.7377    | 5986.730773 | H2-K1   |
| ENSMUSG00000003355  | 0.23659726   | -2.07949473  | 8.14E-13 | 8.36E-12 | 160.184665 | 148.705438 | 213.092188  | 50.74168741 | 34.13989488  | 38.7953222  | Fkbp11  |
| ENSMUSG00000022148  | 0.265932018  | -1.910870608 | 8.38E-13 | 8.60E-12 | 716.804003 | 1273.77947 | 1347.93198  | 273.3837852 | 256.0492116  | 358.3462656 | Fyb     |
| ENSMUSG00000037997  | 0.139700303  | -1.397069646 | 8.90E-13 | 9.12E-12 | 386.590923 | 530.252855 | 551.314092  | 176.042589  | 188.6229192  | 191.9347519 | Parp11  |
| ENSMUSG00000055003  | 8.139835264  | 3.024999597  | 9.48E-13 | 9.72E-12 | 10.7386367 | 18.5881797 | 6.19454036  | 86.98574985 | 99.00569515  | 108.2185303 | Lrtm2   |
| ENSMUSG00000064043  | 0.42213673   | -1.244217732 | 9.52E-13 | 9.75E-12 | 550.355133 | 630.04146  | 743.344844  | 252.6728924 | 259.4632011  | 299.1323527 | Trerf1  |
| ENSMUSG00000037661  | 0.3063714504 | -1.705031703 | 9.83E-13 | 1.01E-11 | 141.39205  | 145.770462 | 162.296958  | 46.59950885 | 46.08885809  | 44.92089939 | Gpr160  |
| ENSMUSG00000098188  | 0.345362024  | -1.533818643 | 1.01E-12 | 1.03E-11 | 553.039792 | 387.416798 | 561.225357  | 173.9714997 | 193.7439034  | 150.0766411 | Sowahc  |
| ENSMUSG00000076613  | 0.159557988  | -2.647847254 | 1.03E-12 | 1.06E-11 | 505.596595 | 156.53204  | 115.218451  | 23.89792642 | 12.25115438  | 12.25115438 | Ighg2b  |
| ENSMUSG00000079293  | 0.180089996  | -2.47321005  | 1.08E-12 | 1.11E-11 | 445.653425 | 1020.39323 | 667.771451  | 164.6515979 | 84.49623982  | 135.7836277 | Clec7a  |
| ENSMUSG00000047907  | 0.260534338  | -1.940454565 | 1.12E-12 | 1.15E-11 | 916.363669 | 1249.32134 | 1860.83993  | 398.6846868 | 280.8006354  | 369.5764904 | Tshz2   |
| ENSMUSG00000031264  | 0.284908323  | -1.811430326 | 1.13E-12 | 1.15E-11 | 170.923302 | 240.668011 | 245.303798  | 54.62383181 | 68.40237674  | 68.40237674 | NatK2   |
| ENSMUSG00000038357  | 0.006731984  | -7.214752498 | 1.14E-12 | 1.16E-11 | 77.8551164 | 247.516288 | 94.1570135  | 0           | 2.56049217   | 0           | Campp   |
| ENSMUSG00000028184  | 2.211102923  | 1.144766182  | 1.17E-12 | 1.19E-11 | 1633.16767 | 1220.94991 | 1147.122888 | 2956.47995  | 3070.030047  | 2826.953873 | Adgrl2  |
| ENSMUSG00000031517  | 0.303933724  | -1.71817133  | 1.17E-12 | 1.19E-11 | 851.931848 | 762.115369 | 579.808978  | 286.8458656 | 208.2533588  | 172.5370908 | Gpr160  |
| ENSMUSG00000036036  | 0.294347916  | -1.764405682 | 1.17E-12 | 1.19E-11 | 493.082404 | 414.809905 | 431.1400905 | 179.1492229 | 100.7126899  | 115.3650371 | Zfp57   |
| ENSMUSG00000043895  | 0.396239319  | -1.335556048 | 1.18E-12 | 1.20E-11 | 583.46593  | 520.469032 | 532.730471  | 237.1397228 | 242.3932536  | 168.4533727 | Sfp1r2  |
| ENSMUSG00000024899  | 0.390016983  | -1.35839115  | 1.19E-12 | 1.20E-11 | 1044.33242 | 794.400102 | 1081.56675  | 447.3552849 | 327.7429908  | 364.4718428 | Paaps2  |
| ENSMUSG00000026494  | 0.425928276  | -1.231317585 | 1.19E-12 | 1.20E-11 | 249.247189 | 614.388256 | 789.184442  | 302.3790352 | 343.1059435  | 313.4253662 | Kif26b  |
| ENSMUSG00000030310  | 0.287489633  | -1.798418162 | 1.19E-12 | 1.21E-11 | 686.65919  | 402.091677 | 424.945469  | 88.76372668 | 122.1942676  | 104.1348122 | Ret     |
| ENSMUSG00000002266  | 0.126968812  | -2.977476659 | 1.20E-12 | 1.22E-11 | 213.877849 | 126.203957 | 131.324256  | 28.99524995 | 11.09546584  | 20.41859063 | Zim1    |
| ENSMUSG00000027857  | 4.223081904  | 2.078296228  | 1.21E-12 | 1.22E-11 | 26.8465919 | 26.4147817 | 48.948857   | 112.8743659 | 127.1711084  | 104.1348122 | Tshb    |

|                     |             |              |          |          |             |             |             |             |             |             |               |
|---------------------|-------------|--------------|----------|----------|-------------|-------------|-------------|-------------|-------------|-------------|---------------|
| ENSMUSG00000022018  | 0.359559816 | -1.475696298 | 1.83E-12 | 1.81E-11 | 587.045475  | 493.075925  | 778.03427   | 237.1397228 | 221.9093167 | 208.2696244 | Rgcc          |
| ENSMUSG00000046731  | 0.490079335 | -1.02891278  | 1.85E-12 | 1.83E-11 | 566.463088  | 480.357697  | 564.942081  | 254.7439817 | 260.3166985 | 274.630044  | Kctd11        |
| ENSMUSG00000052221  | 19.80106872 | 4.307506394  | 1.85E-12 | 1.84E-11 | 6.26420477  | 0.97832525  | 3.71672422  | 70.41703559 | 58.03782129 | 91.88365784 | Ppp1r36       |
| ENSMUSG00000078517  | 2.240648408 | 1.163916286  | 1.91E-12 | 1.90E-11 | 72.2886959  | 754.288767  | 538.925012  | 1509.824087 | 1585.798117 | 1539.561734 | Emc1          |
| ENSMUSG00000041959  | 0.470575469 | -1.087501978 | 1.94E-12 | 1.92E-11 | 4006.40639  | 4656.82818  | 5401.6392   | 2408.676835 | 1944.267013 | 2265.44263  | S100a10       |
| ENSMUSG00000040253  | 0.327086271 | -1.612256888 | 1.94E-12 | 1.92E-11 | 1251.94607  | 2364.61123  | 1787.74435  | 579.904999  | 608.5436262 | 578.8670444 | Gbp7          |
| ENSMUSG00000021765  | 0.347936983 | -1.523102061 | 1.96E-12 | 1.94E-11 | 817.031279  | 844.29469   | 1222.80227  | 377.973794  | 277.3866459 | 348.1369703 | Fst           |
| ENSMUSG00000105746  | 18.50723668 | 4.210017597  | 1.99E-12 | 1.97E-11 | 8.05397756  | 5.86995149  | 0           | 64.20376774 | 109.2476636 | 99.03016456 | Gm43595       |
| ENSMUSG00000039137  | 3.614763679 | 1.853901332  | 2.08E-12 | 2.05E-11 | 126.178982  | 67.5044422  | 81.76799328 | 337.587553  | 308.1125513 | 354.2625474 | Whrn          |
| ENSMUSG00000040061  | 0.184877803 | -2.435356076 | 2.10E-12 | 2.07E-11 | 128.863641  | 211.318254  | 139.996612  | 38.31515172 | 28.16541327 | 22.46044969 | P1cb2         |
| ENSMUSG00000032666  | 0.450325633 | -1.150959497 | 2.12E-12 | 2.09E-11 | 904.730146  | 1106.48586  | 795.378983  | 426.6443921 | 404.5577543 | 433.8950509 | 1700025G04Rik |
| ENSMUSG00000028678  | 0.128876742 | -2.955936164 | 2.26E-12 | 2.23E-11 | 65.3267069  | 87.0709471  | 70.6177601  | 8.284357128 | 11.09546584 | 9.188365784 | Klf2c         |
| ENSMUSG00000068122  | 0.004407768 | -7.82573614  | 2.32E-12 | 2.29E-11 | 208.50853   | 86.0926219  | 137.518796  | 0           | 1.706994744 | 0           | Agtr2         |
| ENSMUSG00000084989  | 0.020826642 | -5.585425977 | 2.33E-12 | 2.29E-11 | 63.5369341  | 115.442379  | 53.2730471  | 2.071089282 | 0.853497372 | 2.041859063 | Crocc2        |
| ENSMUSG00000022534  | 0.059510961 | -4.070700775 | 2.36E-12 | 2.32E-11 | 70.6960252  | 133.052234  | 83.0068409  | 7.248812487 | 8.53497372  | 1.020929532 | Mefv          |
| ENSMUSG00000029780  | 2.4755579   | 1.297225407  | 2.38E-12 | 2.33E-11 | 442.073879  | 665.261169  | 568.658805  | 1234.369212 | 1357.060821 | 1525.26872  | Nt5c3         |
| ENSMUSG00000030153  | 3.602923966 | 1.849168206  | 2.38E-12 | 2.34E-11 | 178.082393  | 141.857161  | 153.146785  | 558.1585615 | 394.3157888 | 747.3204171 | Slc2a3        |
| ENSMUSG00000034488  | 0.057410025 | -4.122553507 | 2.42E-12 | 2.37E-11 | 242.514213  | 70.4394179  | 218.047821  | 8.284357128 | 5.120984232 | 17.35580204 | Edil3         |
| ENSMUSG00000042684  | 0.146347901 | -2.772526036 | 2.49E-12 | 2.43E-11 | 78.7500028  | 100.767501  | 123.890807  | 10.3554641  | 14.50945522 | 19.3976611  | Npl           |
| ENSMUSG00000039683  | 0.202755127 | -2.302189698 | 2.63E-12 | 2.57E-11 | 95.7528443  | 124.247307  | 130.085348  | 28.99524995 | 18.77694218 | 23.48137923 | Sdk1          |
| ENSMUSG00000039770  | 2.634762988 | 1.397673189  | 2.65E-12 | 2.59E-11 | 979.900603  | 1294.3243   | 1456.95589  | 2987.546289 | 2856.655704 | 3981.625173 | Ypel5         |
| ENSMUSG00000022906  | 0.488247472 | -1.03431552  | 2.66E-12 | 2.60E-11 | 131.67901   | 1206.27503  | 1004.75445  | 508.4524187 | 502.7099521 | 514.5484839 | Parp9         |
| ENSMUSG00000027864  | 0.412096417 | -1.278946175 | 2.66E-12 | 2.60E-11 | 3926.7615   | 2651.26142  | 3628.76174  | 1587.489935 | 1250.37365  | 1369.066502 | Ptgrfn        |
| ENSMUSG00000026311  | 2.4957118   | 1.319451344  | 2.69E-12 | 2.62E-11 | 460.866494  | 359.0045366 | 403.884032  | 946.4878019 | 870.5673194 | 1239.408451 | Asb1          |
| ENSMUSG00000022439  | 0.201992284 | -2.307627912 | 2.74E-12 | 2.67E-11 | 119.019891  | 226.971458  | 182.119487  | 35.20851779 | 37.55388437 | 33.69067454 | Parvg         |
| ENSMUSG00000020542  | 4.15985053  | 2.056531691  | 2.76E-12 | 2.68E-11 | 437.599447  | 303.280827  | 177.163854  | 1387.629819 | 1323.774424 | 1116.896907 | Myocd         |
| ENSMUSG00000000881  | 2.064845204 | 1.04603363   | 2.76E-12 | 2.69E-11 | 505.610813  | 418.723206  | 562.464265  | 971.3408733 | 1066.018218 | 1028.076038 | Dlg3          |
| ENSMUSG00000084796  | 0.103724252 | -3.269174845 | 2.79E-12 | 2.71E-11 | 76.0653436  | 215.231555  | 162.296958  | 17.6042589  | 17.06994744 | 12.25115438 | Mir142hg      |
| ENSMUSG00000029752  | 0.293234773 | -1.7698719   | 2.89E-12 | 2.80E-11 | 310.525579  | 226.971458  | 223.00345   | 88.02129449 | 61.45181078 | 74.5278558  | Asns          |
| ENSMUSG00000035004  | 0.258993271 | -1.944008817 | 2.97E-12 | 2.88E-11 | 230.88069   | 355.132065  | 216.808913  | 80.772482   | 64.0123029  | 64.31856049 | Igfbf6        |
| ENSMUSG00000086040  | 0.28439508  | -1.814031586 | 2.98E-12 | 2.89E-11 | 603.607983  | 613.409931  | 421.228745  | 191.5757586 | 153.629527  | 178.662668  | Wipf3         |
| ENSMUSG00000046561  | 0.134054212 | -2.899115545 | 3.05E-12 | 2.95E-11 | 123.494323  | 99.7891754  | 89.2013812  | 12.42653569 | 8.53497372  | 21.43952016 | Arp3          |
| ENSMUSG00000035711  | 0.346296281 | -1.529921199 | 3.09E-12 | 2.99E-11 | 260.411941  | 390.351774  | 351.849893  | 119.0876337 | 113.5151505 | 114.3441075 | Dok3          |
| ENSMUSG00000053137  | 0.255532029 | -1.968423964 | 3.13E-12 | 3.02E-11 | 217.457394  | 321.869007  | 377.866962  | 92.16347305 | 78.52175822 | 63.29763095 | Mapk11        |
| ENSMUSG00000066357  | 2.628047172 | 1.393991171  | 3.16E-12 | 3.05E-11 | 956.633557  | 616.344907  | 629.365301  | 1762.496979 | 1945.125011 | 2085.759033 | Wdr6          |
| ENSMUSG00000034795  | 0.218030013 | -2.197401349 | 3.17E-12 | 3.06E-11 | 91.2784123  | 118.377355  | 118.935175  | 25.88861603 | 21.3374343  | 24.50230876 | Cdc122        |
| ENSMUSG00000094403  | 79.73659476 | 6.31717009   | 3.19E-12 | 3.08E-11 | 0           | 1.9566505   | 1.23890807  | 75.59475879 | 75.10776873 | 93.9255169  | Mir692-2      |
| ENSMUSG00000045377  | 0.404107866 | -1.307187661 | 3.22E-12 | 3.11E-11 | 331.107966  | 428.506459  | 339.460812  | 155.3316962 | 151.0690348 | 137.8254868 | Tmem88        |
| ENSMUSG00000026956  | 0.432967441 | -1.207669555 | 3.28E-12 | 3.15E-11 | 799.133551  | 897.124253  | 1116.25617  | 398.6846868 | 377.2458384 | 441.0415576 | Uap1l2        |
| ENSMUSG00000034205  | 0.349717195 | -1.517990427 | 3.33E-12 | 3.21E-11 | 2366.97452  | 2236.45152  | 3802.20887  | 1043.828998 | 955.0635592 | 935.1714509 | Lxmd2         |
| ENSMUSG00000025324  | 0.321185693 | 1.221063928  | 3.51E-12 | 3.38E-11 | 800.923324  | 620.258203  | 535.208287  | 1627.876176 | 1512.397343 | 1427.259485 | Atp10a        |
| ENSMUSG00000026622  | 0.122961108 | -3.023726028 | 3.53E-12 | 3.39E-11 | 75.104572   | 108.594152  | 91.6791974  | 7.248812487 | 9.388471092 | 7.35580204  | Nek2          |
| ENSMUSG00000040605  | 0.483075015 | -1.049680857 | 3.63E-12 | 3.48E-11 | 1157.08811  | 1198.44843  | 1054.31077  | 597.5092579 | 460.8885809 | 591.1181988 | Bace2         |
| ENSMUSG00000046688  | 0.351834157 | -1.507032544 | 3.83E-12 | 3.67E-11 | 368.693195  | 568.406969  | 491.846505  | 183.2914015 | 150.2155375 | 169.4743022 | Tifa          |
| ENSMUSG00000032507  | 3.017289771 | 1.593253255  | 4.05E-12 | 3.87E-11 | 276.18757   | 141.857161  | 125.129715  | 428.7154814 | 479.665523  | 526.7996383 | Fbxl2         |
| ENSMUSG00000037465  | 0.452245781 | -1.144821051 | 4.08E-12 | 3.90E-11 | 1043.43754  | 897.124253  | 1059.2664   | 530.1988562 | 387.4878069 | 440.0206281 | Klf10         |
| ENSMUSG00000041423  | 2.541777056 | 1.345837495  | 4.13E-12 | 3.95E-11 | 150.340914  | 120.334006  | 128.84644   | 336.5520083 | 299.5775776 | 381.8276448 | Pagr6         |
| ENSMUSG00000042804  | 0.373331247 | -1.421471832 | 4.14E-12 | 3.95E-11 | 1259.10516  | 859.947894  | 1138.55652  | 473.2439009 | 334.5709698 | 409.3927421 | Gpr153        |
| ENSMUSG00000020737  | 0.352301133 | -1.505118775 | 4.15E-12 | 3.97E-11 | 1083.70742  | 1688.58938  | 1885.61809  | 571.6206418 | 553.9197944 | 514.5484839 | Hn1           |
| ENSMUSG00000026770  | 0.0733169   | -3.769710396 | 4.17E-12 | 3.98E-11 | 51.0085245  | 67.5044422  | 80.5290247  | 7.248812487 | 3.413989488 | 4.083718126 | Pnl3          |
| ENSMUSG00000041445  | 0.465452401 | -1.103294456 | 4.26E-12 | 4.06E-11 | 3487.37228  | 3475.01128  | 2583.12333  | 1634.089444 | 1392.907711 | 1418.071119 | Mmrn2         |
| ENSMUSG00000088948  | 38.16108858 | 5.254030421  | 4.45E-12 | 4.24E-11 | 3.57954558  | 0.97832525  | 1.23890807  | 72.48812487 | 108.3941662 | 49.00461751 | Gm23262       |
| ENSMUSG00000002844  | 0.448607584 | -1.156474232 | 4.52E-12 | 4.31E-11 | 791.079574  | 729.830635  | 699.983061  | 362.4406244 | 271.4121643 | 364.4718428 | Pdia5         |
| ENSMUSG00000020589  | 0.375085062 | -1.414710289 | 4.55E-12 | 4.34E-11 | 475.184676  | 454.921241  | 381.583686  | 181.2203122 | 129.7310052 | 182.7463861 | Fam49a        |
| ENSMUSG00000007659  | 2.183118697 | 1.126390572  | 4.57E-12 | 4.35E-11 | 944.105147  | 1165.18537  | 1378.90468  | 2433.529906 | 2464.046013 | 2710.567906 | Lcd1l1        |
| ENSMUSG00000018983  | 6.545114383 | 2.710418405  | 4.60E-12 | 4.38E-11 | 117.230118  | 218.16653   | 126.368623  | 756.9831326 | 614.5181078 | 1652.884912 | E2f2          |
| ENSMUSG00000027525  | 5.411524161 | 2.436034988  | 4.62E-12 | 4.39E-11 | 19.6875007  | 14.6748787  | 18.5836211  | 99.41228554 | 80.22875297 | 107.1976008 | Phactr3       |
| ENSMUSG000000106928 | 4.312709366 | 2.108594466  | 4.83E-12 | 4.59E-11 | 42.954547   | 28.3714322  | 55.7508634  | 160.5094194 | 209.1068561 | 173.5580204 | Gm43860       |
| ENSMUSG00000003206  | 0.079719836 | -3.648917447 | 4.88E-12 | 4.64E-11 | 53.6931837  | 70.4394179  | 105.307186  | 4.142178564 | 6.827978976 | 7.146506271 | Ebi3          |
| ENSMUSG00000022469  | 0.469764338 | -1.089990901 | 5.10E-12 | 4.84E-11 | 675.639229  | 650.58629   | 581.047886  | 341.7297315 | 267.1446774 | 288.9230574 | Rapgef3       |
| ENSMUSG00000039697  | 2.007210602 | 1.005191996  | 5.21E-12 | 4.93E-11 | 444.758539  | 383.503497  | 396.450583  | 792.1916504 | 751.0776873 | 917.8156488 | Ncoa7         |
| ENSMUSG00000037664  | 0.406956062 | -1.297055055 | 5.28E-12 | 5.00E-11 | 770.497186  | 732.765611  | 1075.37221  | 335.5164637 | 354.2041604 | 358.3462656 | Cdkn1c        |
| ENSMUSG00000067203  | 0.30376492  | -1.718972825 | 5.34E-12 | 5.05E-11 | 183.451711  | 265.126142  | 196.986384  | 67.31040167 | 59.74148094 | 69.42320814 | H2-K2         |
| ENSMUSG00000002297  | 0.222961378 | -2.165134269 | 5.41E-12 | 5.11E-11 | 151.235801  | 198.600025  | 203.180924  | 38.31515172 | 55.47732918 | 28.58602688 | Dbr4          |
| ENSMUSG00000031373  | 0.347693212 | -1.524113192 | 5.48E-12 | 5.17E-11 | 1107.86936  | 671.131121  | 908.119617  | 360.3695331 | 287.6286144 | 286.8811984 | Car5b         |
| ENSMUSG000000027359 | 25.38180495 | 4.665722761  | 5.90E-12 | 5.56E-11 | 107.7886367 | 12.7182282  | 4.95563229  | 232.9975442 | 57.18432392 | 440.0206281 | Slc27a2       |
| ENSMUSG00000017400  | 0.146475043 | -2.771273217 | 6.15E-12 | 5.79E-11 | 68.0113661  | 89.0275976  | 73.0955763  | 13.46208033 | 11.09546584 | 9.188365784 | Stac2         |
| ENSMUSG00000031840  | 2.284812419 | 1.192075726  | 6.39E-12 | 6.01E-11 | 229.985804  | 325.782308  | 310.965926  | 650.3220346 | 649.5128501 | 676.        |               |

|                    |             |              |          |          |             |            |             |  |             |             |              |               |
|--------------------|-------------|--------------|----------|----------|-------------|------------|-------------|--|-------------|-------------|--------------|---------------|
| ENSMUSG00000060131 | 0.305394106 | -1.711255875 | 1.03E-11 | 9.54E-11 | 150.340914  | 183.925147 | 157.341325  |  | 42.45733028 | 49.50284757 | 58.1929833   | Atp8b4        |
| ENSMUSG00000083646 | 315.3399356 | 8.300764079  | 1.03E-11 | 9.54E-11 | 0           | 0.97832525 | 0           |  | 99.41228554 | 116.0756426 | 132.7208391  | Gm6088        |
| ENSMUSG00000063268 | 0.411459756 | -1.281176766 | 1.07E-11 | 9.85E-11 | 626.420477  | 825.70651  | 929.181054  |  | 337.587553  | 398.7240802 | 343.0323226  | Parp10        |
| ENSMUSG00000041654 | 0.426116188 | -1.230681234 | 1.07E-11 | 9.89E-11 | 292.627851  | 268.061118 | 249.020272  |  | 109.7677319 | 122.0501271 | 113.323178   | Slc39a11      |
| ENSMUSG00000046167 | 2.275053289 | 1.185900338  | 1.07E-11 | 9.89E-11 | 490.838079  | 246.537963 | 211.85328   |  | 526.0566776 | 621.3460868 | 561.5112423  | Gldn          |
| ENSMUSG00000065475 | 3.552984957 | 1.829031581  | 1.08E-11 | 1.00E-10 | 60.8522749  | 52.8295634 | 35.9283341  |  | 160.5094194 | 185.2089297 | 190.9138224  | Mir27b        |
| ENSMUSG00000020363 | 0.370449447 | -1.432651413 | 1.09E-11 | 1.00E-10 | 815.241506  | 667.21782  | 688.832888  |  | 338.6230976 | 209.9603535 | 257.2742419  | Gfpt2         |
| ENSMUSG00000031639 | 0.478065353 | -1.064720243 | 1.12E-11 | 1.03E-10 | 404.284107  | 496.989226 | 431.140009  |  | 241.2819014 | 206.546364  | 207.2486949  | Tlr3          |
| ENSMUSG00000087142 | 3.687621439 | 1.88269056   | 1.15E-11 | 1.06E-10 | 35.7954558  | 34.2413837 | 29.7337937  |  | 134.6208033 | 110.9546584 | 124.5534028  | Gm12454       |
| ENSMUSG00000028167 | 0.352858206 | -1.502839533 | 1.15E-11 | 1.06E-10 | 233.565349  | 198.600025 | 234.153626  |  | 93.19901769 | 70.84028187 | 71.46506721  | Bdh2          |
| ENSMUSG00000022504 | 0.186049345 | -2.426242785 | 1.16E-11 | 1.07E-10 | 289.943192  | 495.032576 | 265.126328  |  | 52.81277669 | 93.88471092 | 47.98368798  | Ciita         |
| ENSMUSG00000096727 | 0.243502084 | -2.037993977 | 1.26E-11 | 1.15E-10 | 403.593764  | 944.083865 | 722.283406  |  | 160.5094194 | 164.7249928 | 178.662668   | Psmb9         |
| ENSMUSG00000097324 | 4.21758392  | 2.076416775  | 1.29E-11 | 1.18E-10 | 1089.07674  | 691.675951 | 400.167307  |  | 3310.636217 | 2994.922278 | 2902.502658  | Carmn         |
| ENSMUSG00000021506 | 0.149730231 | -2.739562556 | 1.29E-11 | 1.19E-10 | 120.809663  | 127.182282 | 266.365236  |  | 25.88861603 | 27.3119159  | 23.48137923  | Pitx1         |
| ENSMUSG00000073759 | 28.27964586 | 4.821692149  | 1.36E-11 | 1.24E-10 | 2.68465919  | 0.97832525 | 2.47781615  |  | 48.67059813 | 59.74481604 | 64.31856049  | 4933407E24Rik |
| ENSMUSG00000021200 | 3.558461177 | 1.831253496  | 1.37E-11 | 1.26E-10 | 539.616496  | 1076.15777 | 540.16392   |  | 2351.72188  | 2603.166985 | 2719.756272  | Asb2          |
| ENSMUSG00000035681 | 0.139618861 | -2.840432429 | 1.38E-11 | 1.26E-10 | 135.127846  | 100.767501 | 68.139944   |  | 15.53316962 | 11.94896321 | 15.31394297  | Kcnc2         |
| ENSMUSG00000043505 | 0.389919783 | -1.35875074  | 1.45E-11 | 1.32E-10 | 247.883532  | 212.296579 | 214.331077  |  | 92.16347305 | 91.3242188  | 79.63250346  | Gimap5        |
| ENSMUSG00000040856 | 0.057472796 | -4.120976959 | 1.45E-11 | 1.32E-10 | 107.836367  | 93.9192239 | 241.587074  |  | 16.56871426 | 5.974481604 | 3.062788595  | Dkl1          |
| ENSMUSG00000023979 | 4.051957599 | 2.018619077  | 1.54E-11 | 1.41E-10 | 33.1107966  | 30.3280827 | 33.450518   |  | 111.8388212 | 120.3431294 | 160.2859364  | Guca1b        |
| ENSMUSG00000106258 | 84.18591334 | 6.395506945  | 1.57E-11 | 1.43E-10 | 0           | 1.9566505  | 1.23890807  |  | 81.80802664 | 120.3431294 | 56.15112423  | Rpl7a-ps7     |
| ENSMUSG00000035285 | 2.372727928 | 1.246546682  | 1.59E-11 | 1.45E-10 | 175.397733  | 187.838448 | 249.020523  |  | 484.634892  | 454.9140993 | 507.4019772  | Nat14         |
| ENSMUSG00000048065 | 2.667690556 | 1.415591328  | 1.60E-11 | 1.45E-10 | 68.9062524  | 65.5477917 | 74.3344844  |  | 183.2914015 | 176.673956  | 196.0184701  | Cyb5f2        |
| ENSMUSG00000040010 | 3.215862881 | 1.685205894  | 1.60E-11 | 1.46E-10 | 140.497164  | 171.206919 | 137.051519  |  | 415.253401  | 480.5190204 | 705.4623063  | Slc7a5        |
| ENSMUSG00000059708 | 2.135839028 | 1.094802919  | 1.62E-11 | 1.47E-10 | 247.883532  | 199.578351 | 262.648511  |  | 525.021133  | 505.2704442 | 483.9205979  | Akap17b       |
| ENSMUSG00000047963 | 3.563800041 | 1.833124893  | 1.63E-11 | 1.48E-10 | 488.607972  | 758.202068 | 587.242426  |  | 2914.02262  | 2173.857806 | 1446.657146  | 5tdb1         |
| ENSMUSG00000032484 | 0.00912317  | -6.776249159 | 1.64E-11 | 1.49E-10 | 262.201714  | 778.746898 | 94.1570135  |  | 2.071089282 | 5.120984232 | 3.062788595  | Ngp           |
| ENSMUSG00000052102 | 0.488207408 | -1.034433908 | 1.72E-11 | 1.56E-10 | 464.446039  | 525.360659 | 495.563229  |  | 250.6018031 | 260.3166985 | 213.3747221  | Gnpd1a        |
| ENSMUSG00000030671 | 0.387212824 | -1.36880136  | 1.72E-11 | 1.56E-10 | 1551.73301  | 961.693719 | 1290.94221  |  | 515.7012312 | 522.3403916 | 434.9159804  | Pde3b         |
| ENSMUSG00000039157 | 0.456589948 | -1.131028995 | 1.94E-11 | 1.76E-10 | 625.52559   | 631.019785 | 618.215128  |  | 245.4240799 | 267.9981748 | 343.0323226  | Fam102a       |
| ENSMUSG00000031897 | 0.356290045 | -1.488875921 | 1.98E-11 | 1.79E-10 | 822.400597  | 1440.09477 | 1305.80911  |  | 409.0401332 | 413.8969702 | 429.8113328  | Psmb10        |
| ENSMUSG00000011008 | 0.113101283 | -3.144312802 | 2.00E-11 | 1.81E-10 | 57.27272723 | 96.4610927 | 59.4673956  |  | 7.248812487 | 8.53497367  | 5.104647658  | Mcoln2        |
| ENSMUSG00000022330 | 0.117587098 | -3.088198327 | 2.08E-11 | 1.88E-10 | 60.8522749  | 58.6995149 | 86.7235651  |  | 8.284357128 | 6.827978976 | 9.188365784  | Osrf2         |
| ENSMUSG00000028803 | 2.332074297 | 1.221613752  | 2.09E-11 | 1.89E-10 | 334.687512  | 367.850293 | 249.020523  |  | 745.592145  | 685.3583897 | 794.2831755  | Nipal3        |
| ENSMUSG00000016256 | 0.459231658 | -1.122705996 | 2.10E-11 | 1.90E-10 | 4040.41208  | 5609.71698 | 5969.05909  |  | 2436.63654  | 2267.742517 | 2467.586678  | Ctsa2         |
| ENSMUSG00000026042 | 0.393707274 | -1.344804728 | 2.14E-11 | 1.93E-10 | 20124.2053  | 11839.6922 | 13727.1014  |  | 6291.969239 | 5938.634714 | 5759.063487  | Col5a2        |
| ENSMUSG0000002537  | 0.391947627 | -1.351267203 | 2.17E-11 | 1.96E-10 | 736.491503  | 546.883814 | 496.802137  |  | 240.2463567 | 210.8138509 | 248.0858762  | Tmem44        |
| ENSMUSG00000026413 | 0.016056413 | -5.960706563 | 2.18E-11 | 1.96E-10 | 63.5369341  | 52.8295634 | 127.607531  |  | 1.035544641 | 0           | 3.062788595  | Pkp1          |
| ENSMUSG00000038879 | 3.285190672 | 1.715977107  | 2.19E-11 | 1.98E-10 | 112.755686  | 90.9842481 | 61.9454038  |  | 272.3482406 | 328.5964882 | 277.6928326  | Nipal2        |
| ENSMUSG00000033105 | 2.156176608 | 1.326601739  | 2.25E-11 | 2.02E-10 | 206.718757  | 156.53204  | 126.379888  |  | 421.4666689 | 413.9462254 | 419.6020375  | Lss           |
| ENSMUSG00000026921 | 0.456614929 | -1.130590677 | 2.27E-11 | 2.04E-10 | 3843.53707  | 4485.62127 | 5192.26373  |  | 2200.532362 | 1710.408733 | 2263.400771  | Egfr1         |
| ENSMUSG00000079669 | 2.501956551 | 1.323056793  | 2.28E-11 | 2.05E-10 | 81.434662   | 90.9842481 | 96.6348297  |  | 213.3221961 | 240.6865299 | 216.4370667  | Gm17396       |
| ENSMUSG00000006611 | 0.439326521 | -1.186634502 | 2.29E-11 | 2.06E-10 | 774.971618  | 748.418815 | 577.331162  |  | 338.6230976 | 274.8261538 | 311.3835071  | Hfe           |
| ENSMUSG00000028347 | 0.179192755 | -2.480415785 | 2.30E-11 | 2.06E-10 | 102.017049  | 117.39903  | 98.986384   |  | 24.85307138 | 23.04442904 | 26.54416782  | Tmeff1        |
| ENSMUSG00000042680 | 0.470034181 | 2.05040911   | 2.37E-11 | 2.12E-10 | 115.440345  | 101.745826 | 48.3174148  |  | 344.8363655 | 377.2458348 | 366.5137018  | Garem1        |
| ENSMUSG00000010142 | 0.178828542 | -2.483351078 | 2.47E-11 | 2.21E-10 | 122.599436  | 190.773423 | 182.119487  |  | 22.7819821  | 43.52836597 | 21.43952016  | Tnfrsf13b     |
| ENSMUSG00000036894 | 0.404376901 | -1.306227506 | 2.50E-11 | 2.23E-10 | 501.136381  | 610.474955 | 724.761222  |  | 279.5970531 | 222.7628141 | 239.9184399  | Rap2b         |
| ENSMUSG00000061482 | 18.42601001 | 4.203671797  | 2.51E-11 | 2.25E-10 | 2.68465919  | 0.97832525 | 9.91126458  |  | 61.09713382 | 85.3497372  | 87.79993971  | Hist1h4d      |
| ENSMUSG00000083992 | 4.7346677   | 2.243263175  | 2.51E-11 | 2.25E-10 | 37.5852286  | 43.0463109 | 54.5119552  |  | 230.9264549 | 267.9981748 | 136.8045572  | Gm11478       |
| ENSMUSG00000025746 | 0.086764032 | -3.526759085 | 2.52E-11 | 2.26E-10 | 54.5880701  | 69.4610927 | 74.3344844  |  | 7.248812487 | 7.681476348 | 2.041859063  | Il6           |
| ENSMUSG00000097336 | 11.01589948 | 3.461515395  | 2.54E-11 | 2.27E-10 | 6.26420477  | 4.89162624 | 6.19454036  |  | 49.70614277 | 61.45181078 | 79.63250346  | Fendrr        |
| ENSMUSG00000032826 | 2.155171128 | 1.107802429  | 2.61E-11 | 2.33E-10 | 1097.13072  | 746.462165 | 857.324386  |  | 1889.86897  | 2022.788772 | 1911.180083  | Ank2          |
| ENSMUSG00000001098 | 2.09018312  | 1.064205696  | 2.62E-11 | 2.33E-10 | 3014.87227  | 2509.40426 | 2066.49867  |  | 5184.972018 | 5647.59211  | 5046.4554674 | Kctd10        |
| ENSMUSG00000002227 | 0.423338495 | -1.240116413 | 2.70E-11 | 2.40E-10 | 361.534104  | 448.072964 | 393.972767  |  | 148.0828837 | 166.4319875 | 194.9975405  | Mov10         |
| ENSMUSG00000018899 | 0.409830721 | -1.286899961 | 2.74E-11 | 2.44E-10 | 1188.40913  | 1904.79926 | 1621.73067  |  | 645.1443114 | 605.1296367 | 681.9809271  | Irf1          |
| ENSMUSG00000031616 | 0.359828238 | -1.474619688 | 2.78E-11 | 2.48E-10 | 2210.3694   | 1326.60904 | 1371.47124  |  | 606.8291596 | 542.8243286 | 617.6623666  | Ednra         |
| ENSMUSG00000023905 | 2.406991548 | 1.267231076  | 2.80E-11 | 2.49E-10 | 608.522749  | 741.570538 | 986.1708246 |  | 1978.925809 | 1841.847329 | 1794.794116  | Tnfrsf12a     |
| ENSMUSG00000017929 | 0.490771667 | -1.026876131 | 2.81E-11 | 2.50E-10 | 795.554006  | 935.278938 | 928.972126  |  | 489.8126152 | 379.8063305 | 435.93691    | B4galT5       |
| ENSMUSG00000033910 | 2.412231804 | 1.27036855   | 2.82E-11 | 2.51E-10 | 3609.97172  | 2499.62101 | 2212.68982  |  | 6536.357774 | 6670.081962 | 6875.960395  | Gucyl1a       |
| ENSMUSG00000029335 | 3.506274281 | 1.809938857  | 2.84E-11 | 2.52E-10 | 108.281254  | 126.203957 | 69.3788521  |  | 425.6084751 | 354.2014094 | 290.9649165  | Bmp3          |
| ENSMUSG00000039232 | 4.878849154 | 2.286540878  | 2.85E-11 | 2.53E-10 | 108.281254  | 148.638763 | 123.890807  |  | 571.6206418 | 356.7619015 | 935.1714509  | Stx11         |
| ENSMUSG0000002061  | 10.82565779 | 3.436382783  | 2.94E-11 | 2.61E-10 | 2.68465919  | 8.80492724 | 12.3890807  |  | 71.45258023 | 101.5661873 | 76.56971486  | Nkx3-1        |
| ENSMUSG00000032014 | 0.343021036 | -1.54363104  | 2.94E-11 | 2.61E-10 | 1071.17902  | 1023.32821 | 1511.46785  |  | 447.3552849 | 308.1125533 | 481.8787389  | Oaf           |
| ENSMUSG00000028420 | 2.005075496 | 1.003656559  | 2.98E-11 | 2.64E-10 | 1058.65061  | 1338.34894 | 1053.07186  |  | 2424.210005 | 2453.804944 | 2040.838134  | Tmem38b       |
| ENSMUSG00000092586 | 61.63665117 | 5.945716575  | 3.02E-11 | 2.68E-10 | 0           | 0.97832525 | 3.71672422  |  | 53.84832133 | 67.42629239 | 137.8254868  | Ly6g6c        |
| ENSMUSG00000029095 | 0.282179142 | -1.825316741 | 3.06E-11 | 2.71E-10 | 261.306827  | 459.812867 | 292.382305  |  | 105.6255534 | 94.73820829 | 85.75808065  | Abliim2       |
|                    |             |              |          |          |             |            |             |  |             |             |              |               |

|                     |              |               |          |          |             |            |             |             |             |             |               |
|---------------------|--------------|---------------|----------|----------|-------------|------------|-------------|-------------|-------------|-------------|---------------|
| ENSMUSG00000025494  | 0.411402958  | -1.281375929  | 4.29E-11 | 3.74E-10 | 278.309669  | 324.803983 | 251.498339  | 113.9099105 | 111.8081557 | 126.5952619 | Sigirr        |
| ENSMUSG00000044827  | 0.191797081  | -2.382347329  | 4.38E-11 | 3.81E-10 | 192.400575  | 324.803983 | 256.453971  | 42.45733028 | 73.40077399 | 31.64881548 | Tlr1r         |
| ENSMUSG00000051367  | 0.455734467  | -1.133734609  | 4.42E-11 | 3.84E-10 | 551.25002   | 665.261169 | 662.815819  | 328.2676512 | 280.8006354 | 247.0649466 | Six1r         |
| ENSMUSG00000057614  | 2.167443176  | -1.115994171  | 4.83E-11 | 4.19E-10 | 1047.01708  | 834.511437 | 1010.94899  | 2260.593951 | 2304.442904 | 1702.910459 | Gna1r         |
| ENSMUSG00000029603  | 0.407611818  | -1.294732216  | 5.00E-11 | 4.34E-10 | 406.278424  | 371.763594 | 391.494951  | 166.7226872 | 125.4641137 | 185.8091747 | Dxb1r         |
| ENSMUSG00000086098  | 6.735186659  | -7.15717929   | 5.03E-11 | 4.37E-10 | 7.15909116  | 13.696535  | 11.501727   | 72.48812487 | 69.9867845  | 71.46506721 | Gm14291       |
| ENSMUSG00000046275  | 0.244457065  | -2.032346995  | 5.20E-11 | 4.51E-10 | 1101.60515  | 501.880853 | 1013.4268   | 261.9927942 | 174.9669613 | 203.1649768 | Tusc5         |
| ENSMUSG00000033377  | 0.497797397  | -1.006369407  | 5.25E-11 | 4.55E-10 | 768.707414  | 674.060696 | 683.877256  | 374.86716   | 303.8450644 | 381.8276448 | Palmd         |
| ENSMUSG00000069306  | 334.0770784  | -8.38403719   | 5.37E-11 | 4.64E-10 | 0           | 0          | 0           | 86.98574985 | 43.52835697 | 59.21391283 | Hist1h4m      |
| ENSMUSG00000052760  | 0.267710173  | -1.901256134  | 5.69E-11 | 4.91E-10 | 179.872165  | 255.34289  | 213.092188  | 39.35069636 | 68.27978976 | 65.33949002 | A630001G21Rik |
| ENSMUSG00000043557  | 2.872819181  | -1.522467191  | 5.70E-11 | 4.92E-10 | 164.659097  | 247.516288 | 146.191153  | 477.3860795 | 548.7988102 | 580.9089034 | Mdga1         |
| ENSMUSG00000072568  | 0.448182343  | -1.157842282  | 5.80E-11 | 5.00E-10 | 279.204555  | 296.43255  | 333.266272  | 142.9051605 | 125.4641137 | 138.8464163 | Fam84b        |
| ENSMUSG00000033715  | 2.356822025  | -1.236842818  | 5.83E-11 | 5.03E-10 | 297.99717   | 351.218764 | 289.904489  | 671.0329274 | 897.8792353 | 644.2065344 | Akr1c14       |
| ENSMUSG00000059022  | 0.120580593  | -3.051930361  | 5.88E-11 | 5.06E-10 | 131.5483    | 144.792137 | 159.819141  | 18.63980354 | 5.974481604 | 28.58602688 | Kcp           |
| ENSMUSG00000026580  | 0.431849719  | -1.211398744  | 5.95E-11 | 5.12E-10 | 751.704572  | 597.756727 | 515.385758  | 257.8506156 | 274.8261538 | 273.6091144 | Selp          |
| ENSMUSG00000021806  | 0.233848864  | -2.096351674  | 5.97E-11 | 5.14E-10 | 1166.93186  | 633.954761 | 502.996677  | 175.0070443 | 211.6673482 | 152.1185002 | Nid2          |
| ENSMUSG00000044285  | 2.731132576  | -1.449499348  | 6.05E-11 | 5.20E-10 | 119.914777  | 122.290656 | 87.9624732  | 305.4856691 | 341.3989488 | 258.2951715 | Gm1821        |
| ENSMUSG00000082101  | 282.1407865  | -8.140271428  | 6.19E-11 | 5.32E-10 | 0           | 0.97832525 | 0           | 72.48812487 | 103.273182  | 135.7836277 | Sfnr14        |
| ENSMUSG00000023885  | 0.308758104  | -1.69545109   | 6.44E-11 | 5.53E-10 | 6018.11101  | 2830.29494 | 5530.48564  | 1486.00656  | 1504.715867 | 1448.699005 | Thbs2         |
| ENSMUSG00000027947  | 0.419346192  | -1.25378634   | 6.48E-11 | 5.56E-10 | 884.147759  | 1071.26615 | 1371.47124  | 486.7059813 | 482.2260152 | 424.7066851 | Il6ra         |
| ENSMUSG00000052889  | 0.206038658  | -2.279013046  | 6.50E-11 | 5.57E-10 | 242.514213  | 513.620756 | 651.665646  | 103.5544641 | 91.3242188  | 94.94644643 | Prkcb         |
| ENSMUSG00000045730  | 0.371279478  | -1.429422521  | 6.62E-11 | 5.67E-10 | 186.13637   | 232.841409 | 246.542706  | 79.73693736 | 87.91022931 | 78.61157393 | Adrb2         |
| ENSMUSG00000047085  | 7.446516709  | -2.896565727  | 6.72E-11 | 5.76E-10 | 13.4232959  | 6.84827674 | 11.1501272  | 75.59475879 | 63.15880553 | 95.96737596 | Lrrc4b        |
| ENSMUSG00000025600  | 0.289875769  | -1.786493352  | 7.05E-11 | 6.03E-10 | 171.818188  | 285.670973 | 261.409603  | 71.45258023 | 61.45181078 | 75.54878533 | Col7a1        |
| ENSMUSG00000042351  | 4.456652113  | -2.155960348  | 7.22E-11 | 6.17E-10 | 50.1136381  | 67.5044422 | 29.7337937  | 210.2155621 | 183.501935  | 268.5044668 | Grap2         |
| ENSMUSG00000033220  | 0.303053103  | -1.722357482  | 7.50E-11 | 6.40E-10 | 451.91763   | 880.492724 | 639.276565  | 197.7890264 | 223.6163115 | 175.5987994 | Rac2          |
| ENSMUSG00000027848  | 0.398925792  | -1.325807694  | 7.54E-11 | 6.43E-10 | 2151.30689  | 1641.62977 | 1976.05838  | 888.497302  | 570.1362445 | 844.3087226 | Olfrn3        |
| ENSMUSG00000024079  | 0.434995274  | -1.186080442  | 7.59E-11 | 6.47E-10 | 964.687534  | 1323.67406 | 1414.83302  | 494.9903384 | 545.3848207 | 586.0135511 | Efr2ak2       |
| ENSMUSG00000084319  | 2.779630787  | -1.474893265  | 7.61E-11 | 6.49E-10 | 349.005694  | 496.989226 | 586.003518  | 1418.696158 | 1484.23193  | 1070.955079 | Tp1-ps3       |
| ENSMUSG00000053475  | 0.242761803  | -2.042386654  | 7.92E-11 | 6.75E-10 | 213.877849  | 200.556676 | 79.10587    | 61.09713382 | 59.74481604 | 71.46506721 | Tnfai6p       |
| ENSMUSG00000045328  | 0.350202417  | -1.513739053  | 8.05E-11 | 6.85E-10 | 179.872165  | 222.079831 | 218.047821  | 84.91466056 | 70.84028187 | 61.25577189 | Cenpe         |
| ENSMUSG00000032363  | 0.186083407  | -2.4625978679 | 8.50E-11 | 7.22E-10 | 287.258533  | 183.925147 | 257.6928719 | 40.386241   | 26.5841853  | 69.42320814 | Adams7        |
| ENSMUSG00000047205  | 0.377146935  | -1.406801393  | 8.58E-11 | 7.29E-10 | 247.883532  | 242.64662  | 266.365236  | 114.9454552 | 93.88471092 | 76.56971486 | Dusp18        |
| ENSMUSG00000030273  | 2.4552412    | -1.29586476   | 9.40E-11 | 7.97E-10 | 294.417624  | 211.318254 | 204.419832  | 654.4642131 | 531.7288627 | 562.5321719 | Car1r         |
| ENSMUSG00000053647  | 0.321706424  | -1.63618335   | 9.56E-11 | 8.10E-10 | 151.235801  | 135.98721  | 126.368623  | 43.49287492 | 48.6493582  | 40.83718126 | Gper1         |
| ENSMUSG00000040035  | 0.14354363   | -2.800438783  | 9.68E-11 | 8.20E-10 | 92.1732987  | 84.1359714 | 95.4675875  | 10.35544641 | 8.53497372  | 15.31394297 | Disp2         |
| ENSMUSG00000027868  | 0.300926977  | -1.732514652  | 9.73E-11 | 8.24E-10 | 707.855139  | 1413.67998 | 962.631572  | 269.2416067 | 294.4565933 | 364.4718428 | Tbx15         |
| ENSMUSG00000041329  | 2.027219041  | -1.01950198   | 9.94E-11 | 8.40E-10 | 1464.92903  | 2107.31259 | 1652.70337  | 3576.77119  | 3383.263582 | 3632.467273 | Atp1b2        |
| ENSMUSG00000050493  | 0.175285258  | -2.668569681  | 9.97E-11 | 8.42E-10 | 99.332899   | 161.423666 | 139.996612  | 26.92416067 | 25.60492116 | 10.20929532 | Fam167b       |
| ENSMUSG00000022357  | 3.753081513  | -1.908075624  | 1.00E-10 | 8.45E-10 | 45.6392062  | 47.9379372 | 28.4948837  | 141.8696158 | 179.2344481 | 140.8882754 | Khlh38        |
| ENSMUSG00000000942  | 3.592840321  | -1.845124818  | 1.01E-10 | 8.50E-10 | 30.4261374  | 31.306408  | 32.2116099  | 99.41228554 | 122.9036216 | 114.3441075 | Hoxa4         |
| ENSMUSG00000005447  | 0.231819375  | -2.108926948  | 1.01E-10 | 8.51E-10 | 95.7528443  | 109.572428 | 149.907877  | 30.03079459 | 25.60491216 | 26.54416782 | Pafah1b3      |
| ENSMUSG00000024806  | 0.150242642  | -2.734633754  | 1.01E-10 | 8.51E-10 | 81.434662   | 65.5477917 | 79.2901166  | 16.56871426 | 8.53497372  | 9.188365784 | Mlana         |
| ENSMUSG00000044258  | 2.751539097  | -1.460238828  | 1.02E-10 | 8.55E-10 | 2133.83528  | 1776.63865 | 1915.35188  | 4677.555143 | 3402.040525 | 6298.11428  | Ctla2a        |
| ENSMUSG00000011263  | 0.237920919  | -2.071450392  | 1.02E-10 | 8.56E-10 | 154.7702735 | 287.627623 | 419.989837  | 94.23456233 | 64.86580027 | 60.23484236 | Exoc3l2       |
| ENSMUSG00000079298  | 0.055184263  | -4.179599291  | 1.07E-10 | 8.99E-10 | 55.4829565  | 115.442379 | 94.1570135  | 10.35544641 | 3.413989488 | 1.020929532 | Klr1b1b       |
| ENSMUSG00000034317  | 2.395319961  | -1.260218381  | 1.07E-10 | 9.00E-10 | 239.829554  | 220.123181 | 244.06489   | 449.4263742 | 563.3082655 | 672.7925613 | Trim59        |
| ENSMUSG00000030353  | 0.244481607  | -2.032202161  | 1.10E-10 | 9.24E-10 | 130.809663  | 155.553715 | 137.518796  | 37.27960708 | 40.96787385 | 22.4604969  | Tea4d         |
| ENSMUSG00000032131  | 3.414609968  | -1.771720797  | 1.12E-10 | 9.40E-10 | 93.0681851  | 51.8512382 | 64.4232198  | 226.7842764 | 218.4953272 | 272.5881849 | Abcg4         |
| ENSMUSG00000030268  | 0.173743507  | -2.524969028  | 1.13E-10 | 9.44E-10 | 131.5483    | 142.835486 | 298.576846  | 34.17297315 | 32.43290013 | 32.66974501 | Bcat1         |
| ENSMUSG00000064325  | 3.860095778  | -1.948636645  | 1.13E-10 | 9.50E-10 | 166.44887   | 161.423666 | 83.0068409  | 638.9310435 | 401.1437648 | 553.3438061 | Hhip          |
| ENSMUSG00000028681  | 0.34954545   | -1.516448037  | 1.14E-10 | 9.51E-10 | 442.073879  | 384.481823 | 277.515408  | 123.2298123 | 117.7826373 | 145.992923  | Ptch2         |
| ENSMUSG00000085282  | 3.679546059  | -1.879527794  | 1.14E-10 | 9.56E-10 | 50.1136381  | 40.1113352 | 27.2559776  | 147.047339  | 177.4130769 | 153.1394297 | Gm15663       |
| ENSMUSG00000085382  | 2.291522645  | -1.196306543  | 1.20E-10 | 1.00E-09 | 148.551142  | 145.770462 | 199.4642    | 375.9027047 | 363.5898805 | 386.9322924 | Gm13861       |
| ENSMUSG00000058756  | 2.114863342  | -1.080564442  | 1.25E-10 | 1.05E-09 | 2235.42622  | 2140.57564 | 3060.10294  | 4826.673572 | 5229.378398 | 5663.096111 | Thra          |
| ENSMUSG00000032717  | 0.358011148  | -1.481923582  | 1.29E-10 | 1.08E-09 | 187.926143  | 170.228593 | 215.570005  | 67.31040167 | 60.59831341 | 77.5906444  | Mdfi          |
| ENSMUSG00000034349  | 0.453192691  | -1.1418035    | 1.30E-10 | 1.09E-09 | 2389.34668  | 2865.51465 | 3730.35221  | 1360.705658 | 1346.818853 | 1362.940925 | Smc4          |
| ENSMUSG000000110439 | 0.065344376  | -3.935815187  | 1.31E-10 | 1.09E-09 | 78.7500028  | 46.9596119 | 53.2730471  | 6.213267846 | 1.706994744 | 4.083718126 | Actr21320     |
| ENSMUSG00000026678  | 2.411625482  | -1.270005879  | 1.33E-10 | 1.11E-09 | 11045.5828  | 7815.84041 | 12623.2344  | 29271.74037 | 23437.89133 | 23215.93755 | Rgs5          |
| ENSMUSG00000040528  | 0.217170073  | -2.239906329  | 1.34E-10 | 1.12E-09 | 101.122163  | 175.12022  | 142.474428  | 32.10188387 | 22.19093167 | 34.71160407 | Milr1         |
| ENSMUSG00000040280  | 0.434286221  | -1.203281915  | 1.37E-10 | 1.14E-09 | 358.849445  | 392.308425 | 475.7407    | 196.7534818 | 162.1645007 | 173.5580204 | Ndufa4l2      |
| ENSMUSG00000056234  | 4.693097621  | -2.23504407   | 1.38E-10 | 1.14E-09 | 1037.17333  | 613.409931 | 323.355007  | 2846.712218 | 2840.439254 | 3586.525444 | Ncoa2         |
| ENSMUSG00000021464  | 0.169413349  | -2.561380537  | 1.42E-10 | 1.18E-09 | 174.502847  | 173.163569 | 299.815754  | 49.70614277 | 19.63043956 | 40.83718126 | Ror4          |
| ENSMUSG00000004933  | 0.213429663  | -2.228167394  | 1.44E-10 | 1.20E-09 | 94.8579579  | 178.055195 | 133.802072  | 31.06633923 | 28.16541327 | 27.56509735 | Matk          |
| ENSMUSG000000304037 | 0.1174122965 | -1.282358134  | 1.50E-10 | 1.25E-09 | 1908.79268  | 1672.93618 | 1354.12652  | 836.7200699 | 611.1041183 | 582.9507625 | Fgd5          |
| ENSMUSG00000020120  | 3.486305214  | -1.801698878  | 1.51E-10 | 1.25E-09 | 895.781282  | 1250.29967 | 1184.39621  | 3479.429994 | 2529.766221 | 5500.81941  | Plek          |
| ENSMUSG00000040907  | 0.18951127   | -2.399644451  | 1.53E-10 | 1.26E-09 | 125.284095  | 310.129104 | 208.136556  | 44.52841956 | 36.70038699 | 40.83718126 | Atp1a3        |
| ENSMUSG00000039497  | 0.886881092  | -1.038358621  | 1.54E-10 | 1.27E-09 | 1252.84095  | 1108.44251 |             |             |             |             |               |

|                    |               |              |          |          |            |            |            |             |             |             |               |
|--------------------|---------------|--------------|----------|----------|------------|------------|------------|-------------|-------------|-------------|---------------|
| ENSMUSG00000074825 | 0.449434928   | -1.153815848 | 2.13E-10 | 1.73E-09 | 247.883532 | 298.389201 | 292.382305 | 122.1942676 | 131.4385953 | 122.5115438 | lttprpl1      |
| ENSMUSG00000031671 | 2.005512377   | 1.003970869  | 2.17E-10 | 1.76E-09 | 244.303986 | 319.912356 | 284.948857 | 586.1182668 | 535.1428522 | 580.9089034 | Setd6         |
| ENSMUSG00000049929 | 0.300459464   | -1.734757728 | 2.31E-10 | 1.87E-09 | 280.099442 | 337.522211 | 525.297023 | 106.661098  | 119.4896321 | 116.3859666 | Lpar4         |
| ENSMUSG00000025930 | 1.0110600118  | -3.176575174 | 2.32E-10 | 1.89E-09 | 83.2244348 | 51.8512382 | 64.4232198 | 4.142178564 | 7.681476348 | 10.20929532 | Msc           |
| ENSMUSG00000026198 | 3.098189145   | 1.631425224  | 2.39E-10 | 1.94E-09 | 70.6960252 | 83.1576461 | 48.3174148 | 189.5046693 | 224.4698088 | 216.4370607 | Abcb6         |
| ENSMUSG0000005973  | 0.480967565   | -1.055988488 | 2.47E-10 | 2.00E-09 | 3051.56261 | 2964.74715 | 3932.29422 | 1717.968559 | 1542.269751 | 1427.259485 | Rcn1          |
| ENSMUSG00000090173 | 3.781218727   | 1.918851305  | 2.49E-10 | 2.01E-09 | 27.7414783 | 23.479806  | 29.7337937 | 91.12792841 | 107.5406689 | 106.1766713 | Fbxw10        |
| ENSMUSG00000028965 | 0.065362951   | -3.935383062 | 2.54E-10 | 2.05E-09 | 46.5340926 | 48.9162624 | 64.4232198 | 2.071089282 | 5.974481604 | 2.041859063 | Tnfrsf9       |
| ENSMUSG00000061751 | 2.380073345   | 1.251006033  | 2.56E-10 | 2.07E-09 | 899.360827 | 730.808961 | 533.969379 | 1640.302711 | 1713.822723 | 1803.982487 | Kalrn         |
| ENSMUSG00000024901 | 2.713470964   | 1.440139471  | 2.57E-10 | 2.08E-09 | 77.8551164 | 63.5911412 | 56.9897713 | 176.042589  | 175.8204586 | 189.8928929 | Peli3         |
| ENSMUSG00000069255 | 0.439588306   | -1.185775087 | 2.58E-10 | 2.09E-09 | 302.471602 | 369.806944 | 407.600756 | 166.7226872 | 150.2155375 | 157.2231479 | Dusp22        |
| ENSMUSG00000025255 | 0.386837884   | -1.370199008 | 2.60E-10 | 2.10E-09 | 1147.24436 | 722.004034 | 973.781745 | 423.5377582 | 310.6730434 | 366.5137018 | Zfhx4         |
| ENSMUSG00000029189 | 3.483003971   | 1.800332118  | 2.69E-10 | 2.17E-09 | 124.389209 | 270.996094 | 152.385693 | 612.0068828 | 660.6069659 | 636.0390981 | Sel1i3        |
| ENSMUSG00000008734 | 0.412758197   | -1.276631227 | 2.71E-10 | 2.18E-09 | 1260.89493 | 883.4277   | 806.529155 | 427.6799367 | 377.2458384 | 414.4973898 | Gprc5b        |
| ENSMUSG00000019817 | 0.311497986   | -1.682705258 | 2.76E-10 | 2.22E-09 | 1004.95742 | 503.837503 | 796.617891 | 274.4193299 | 229.5907931 | 214.3952016 | Plag1         |
| ENSMUSG00000057706 | 0.281746038   | -1.827532774 | 2.77E-10 | 2.23E-09 | 201.349439 | 126.203957 | 178.402762 | 45.5639642  | 53.77033443 | 42.87904032 | Mex3b         |
| ENSMUSG00000046312 | 0.389814579   | -1.359140047 | 2.82E-10 | 2.26E-09 | 510.085245 | 620.258208 | 392.733859 | 208.1444728 | 177.5274534 | 209.290554  | Ala464131     |
| ENSMUSG00000038086 | 2.074582506   | 1.052821034  | 2.91E-10 | 2.34E-09 | 376.747172 | 502.859178 | 359.283341 | 870.8930431 | 842.4019061 | 859.6226655 | Hspb2         |
| ENSMUSG00000021719 | 2.185013751   | 1.127642359  | 2.95E-10 | 2.37E-09 | 1368.2813  | 990.065152 | 911.836341 | 2576.435067 | 2287.372957 | 2287.90308  | Rgs7bp        |
| ENSMUSG00000037446 | 3.586610185   | 1.842620953  | 2.97E-10 | 2.38E-09 | 37.5852286 | 36.1980342 | 52.0341391 | 127.3719908 | 140.8270664 | 179.6835975 | Tulp1         |
| ENSMUSG00000038216 | 58.71686567   | 5.875703054  | 2.99E-10 | 2.40E-09 | 0          | 1.9566505  | 1.23890807 | 61.09713382 | 69.9867845  | 49.00461751 | Pnmt          |
| ENSMUSG00000029674 | 0.434882668   | -1.201301881 | 3.03E-10 | 2.43E-09 | 305.156261 | 304.259152 | 308.488811 | 151.1895176 | 109.2476636 | 139.8673458 | Limk1         |
| ENSMUSG00000045917 | 0.464325757   | -1.106790784 | 3.03E-10 | 2.43E-09 | 245.198872 | 272.952744 | 282.471041 | 125.3009016 | 118.636347  | 127.6161914 | Tmem268       |
| ENSMUSG00000043463 | 11.4823732    | 3.521348947  | 3.05E-10 | 2.44E-09 | 3.56931837 | 5.86995149 | 2.47781615 | 57.9904999  | 59.74481604 | 43.8996986  | Rab3          |
| ENSMUSG00000008475 | 0.481540655   | -1.05427049  | 3.09E-10 | 2.47E-09 | 3344.19046 | 4229.30005 | 5075.80637 | 2078.338095 | 1992.916364 | 2018.377684 | Arcp5         |
| ENSMUSG00000044703 | 0.048643206   | -4.36161787  | 3.12E-10 | 2.50E-09 | 38.480115  | 82.1793209 | 58.2286794 | 5.177723205 | 2.560492116 | 1.020929532 | Phf11a        |
| ENSMUSG00000050022 | 0.259651273   | -1.945352797 | 3.30E-10 | 2.64E-09 | 130.653414 | 214.253229 | 225.481269 | 44.52841956 | 45.23536071 | 58.1929833  | Amz1          |
| ENSMUSG00000095079 | 0.04344362    | -4.524711867 | 3.41E-10 | 2.72E-09 | 3637.7132  | 8344.13605 | 6334.53698 | 377.973794  | 343.1059435 | 274.5278558 | Igha          |
| ENSMUSG00000024039 | 6.808861988   | 2.767413691  | 3.49E-10 | 2.78E-09 | 33.1107966 | 16.6315292 | 28.4948857 | 154.2961515 | 108.3941662 | 70.5463259  | Cbs           |
| ENSMUSG00000032766 | 2.829305961   | 1.500448198  | 3.49E-10 | 2.78E-09 | 1176.77561 | 1377.48195 | 1546.15727 | 3851.19052  | 2651.816335 | 5096.480221 | Gng11         |
| ENSMUSG00000006411 | 0.0733951611  | -3.768172089 | 3.53E-10 | 2.81E-09 | 35.7954558 | 88.0492724 | 100.315554 | 6.213267846 | 5.120984232 | 5.104647658 | Nectn1        |
| ENSMUSG00000020990 | 9.76136325    | 3.28349369   | 3.59E-10 | 2.85E-09 | 20.5823871 | 6.84827674 | 3.71672422 | 102.5189195 | 109.2476636 | 101.0720236 | Cdk1          |
| ENSMUSG00000025092 | 0.33745158    | -1.567247587 | 3.59E-10 | 2.85E-09 | 960.213102 | 746.462165 | 524.058115 | 293.0591334 | 221.0558193 | 239.9184399 | Hspa12a       |
| ENSMUSG00000022033 | 0.186855161   | -2.420007685 | 3.66E-10 | 2.91E-09 | 64.4318205 | 88.0492724 | 73.0955763 | 13.46208033 | 16.21645007 | 12.25115438 | Pbk           |
| ENSMUSG00000019932 | 0.00384967    | -8.021049482 | 3.72E-10 | 2.95E-09 | 56.3778429 | 74.3527189 | 139.996612 | 0           | 0           | 1.020929532 | Kera          |
| ENSMUSG00000047787 | 0.4053273877  | 2.019087661  | 3.75E-10 | 2.98E-09 | 25.9517055 | 26.4147817 | 22.3003453 | 93.19901769 | 120.3431294 | 89.84179877 | Flrt1         |
| ENSMUSG00000060791 | 0.2302060986  | -2.118658107 | 3.77E-10 | 2.99E-09 | 282.784101 | 508.729129 | 480.696332 | 106.661098  | 126.3176111 | 59.21391283 | Gmfg          |
| ENSMUSG00000052566 | 0.376456964   | -1.409443146 | 3.81E-10 | 3.03E-09 | 199.559666 | 212.296579 | 236.631442 | 91.12792841 | 65.71929764 | 87.79993971 | Hook2         |
| ENSMUSG00000000958 | 0.41209105    | -1.278964963 | 3.91E-10 | 3.11E-09 | 298.892056 | 256.321215 | 291.143397 | 95.27010697 | 119.4896321 | 133.7417686 | Slc7a7        |
| ENSMUSG00000028931 | 0.307706611   | -1.700372654 | 3.95E-10 | 3.13E-09 | 168.238642 | 269.039443 | 223.003435 | 71.45258023 | 75.1077683  | 56.15112423 | Kcnab2        |
| ENSMUSG00000041658 | 3.346314833   | 1.742573185  | 3.99E-10 | 3.16E-09 | 70.6960252 | 48.9162624 | 38.4061053 | 182.2558568 | 174.1134639 | 177.6417385 | Rragb         |
| ENSMUSG00000036545 | 0.485598999   | -1.401004438 | 4.00E-10 | 3.17E-09 | 7613.69345 | 6305.30623 | 9527.20308 | 3908.145475 | 3617.121862 | 3868.301995 | Adams2        |
| ENSMUSG00000023013 | 0.099431293   | -3.330156228 | 4.10E-10 | 3.24E-09 | 68.0113661 | 113.485729 | 249.020523 | 15.53316962 | 11.94896321 | 15.31394297 | Aqp2          |
| ENSMUSG00000025792 | 0.390766714   | -1.355620511 | 4.26E-10 | 3.36E-09 | 1060.44038 | 731.787286 | 1112.53945 | 445.2841956 | 316.647525  | 373.6602085 | Slc25a10      |
| ENSMUSG00000041961 | 2.381964072   | 1.252151652  | 4.30E-10 | 3.39E-09 | 163.76421  | 121.312331 | 137.518796 | 324.1254726 | 378.9528332 | 304.2370004 | Znrf3         |
| ENSMUSG00000093843 | 316.7992932   | 8.307425306  | 4.32E-10 | 3.40E-09 | 0          | 0          | 0          | 101.4833748 | 37.55388437 | 40.83718126 | Gm25939       |
| ENSMUSG00000027217 | 0.320640603   | -1.640970966 | 4.58E-10 | 3.60E-09 | 665.795478 | 417.744881 | 436.095642 | 196.7534818 | 126.3176111 | 165.3905841 | Tspan18       |
| ENSMUSG00000022372 | 0.345987367   | -1.531208732 | 4.82E-10 | 3.79E-09 | 326.633534 | 469.596119 | 279.993224 | 132.5497141 | 116.92914   | 123.5324733 | Sla           |
| ENSMUSG00000043336 | 2.133495202   | 1.093218866  | 4.82E-10 | 3.79E-09 | 6127.28715 | 4694.00454 | 3913.7106  | 11033.72815 | 10105.40888 | 10305.26269 | Filip1        |
| ENSMUSG00000040867 | 0.09423540867 | -3.402759198 | 4.86E-10 | 3.82E-09 | 135.127846 | 62.6128159 | 29.901766  | 14.9762497  | 7.681476348 | 4.083718126 | Begain        |
| ENSMUSG00000022623 | 0.381946749   | -1.388556584 | 4.89E-10 | 3.84E-09 | 1813.03984 | 1331.50066 | 1214.12991 | 690.7082756 | 448.9396177 | 526.7996383 | Shank3        |
| ENSMUSG00000087411 | 0.4097142062  | 2.034617917  | 4.97E-10 | 3.90E-09 | 25.0568191 | 18.5881797 | 29.7337937 | 93.19901769 | 110.9546584 | 93.9255169  | Gm16048       |
| ENSMUSG00000045502 | 0.113727776   | -3.13634345  | 5.08E-10 | 3.98E-09 | 86.8039804 | 317.955706 | 203.310108 | 27.95970531 | 26.45841853 | 14.2930134  | Hcar2         |
| ENSMUSG00000024892 | 0.267136105   | -1.904353115 | 5.09E-10 | 3.99E-09 | 3038.13931 | 1638.69479 | 1981.01401 | 768.3741236 | 371.2713568 | 640.1228163 | Pcx           |
| ENSMUSG00000002870 | 0.456735207   | -1.130570033 | 5.12E-10 | 4.01E-09 | 273.835237 | 342.413837 | 319.638283 | 142.9051605 | 151.0690348 | 132.7208391 | Mcm2          |
| ENSMUSG00000049538 | 0.065434688   | -3.93380055  | 5.17E-10 | 4.04E-09 | 135.127846 | 34.2413837 | 110.262818 | 5.177723205 | 5.974481604 | 7.146506721 | Adams16       |
| ENSMUSG00000014813 | 0.390540105   | -1.356457385 | 5.29E-10 | 4.14E-09 | 618.366499 | 617.323232 | 599.358525 | 259.9217049 | 326.8894935 | 249.1068057 | Stc1          |
| ENSMUSG00000020432 | 0.431720167   | -1.211831607 | 5.34E-10 | 4.17E-09 | 2401.87509 | 1853.92635 | 1605.62486 | 958.9143376 | 710.9633109 | 862.6854541 | Tcn2          |
| ENSMUSG00000037474 | 0.216906421   | -2.204855335 | 5.50E-10 | 4.30E-09 | 88.5937531 | 83.1576461 | 90.4402893 | 24.85307138 | 18.77694218 | 13.27208391 | Dtl           |
| ENSMUSG00000002458 | 0.445901788   | -1.165202112 | 5.61E-10 | 4.37E-09 | 462.968766 | 462.747843 | 592.198059 | 219.5354639 | 247.5142379 | 199.0812586 | Rgs19         |
| ENSMUSG00000020261 | 0.459281941   | -1.122548037 | 5.71E-10 | 4.45E-09 | 722.173321 | 625.149834 | 556.269725 | 321.0188387 | 244.9537458 | 310.3625776 | Slc36a1       |
| ENSMUSG00000008486 | 2.881069535   | 1.526604481  | 5.78E-10 | 4.50E-09 | 48.323664  | 45.9812867 | 50.795321  | 130.4786248 | 153.629527  | 132.7208391 | A730011C13Rik |
| ENSMUSG00000045664 | 0.446337822   | -1.33792031  | 5.82E-10 | 4.53E-09 | 302.471602 | 370.785269 | 348.133168 | 163.6160533 | 130.5850979 | 162.3277955 | Cdc42ep2      |
| ENSMUSG00000030220 | 0.474562637   | -1.075329575 | 6.00E-10 | 4.66E-09 | 1368.2813  | 1897.95098 | 1535.0071  | 771.4807576 | 660.6069659 | 847.3715112 | Arhgdib       |
| ENSMUSG00000028161 | 0.360937535   | -1.470178914 | 6.01E-10 | 4.66E-09 | 3527.64217 | 6054.85496 | 6999.83061 | 1923.006398 | 2082.533588 | 1978.561432 | Ppp3ca        |
| ENSMUSG00000029718 | 0.41703341    | -1.26176274  | 6.01E-10 | 4.66E-09 | 6135.34113 | 4613.78187 | 5277.74839 | 2617.856853 | 1637.861457 | 2429.812285 | Pcolce        |
| ENSMUSG00000021306 | 0.497726649   | -1.006574461 | 6.15E-10 | 4.76E-09 | 483.238654 | 476.444396 | 392.733859 | 228.8553657 | 209.1068561 | 236.8556513 | Gpr137b       |
| ENSMUSG00000024186 | 2.562887802   | 1.357770322  | 6.16E-10 | 4.77E-09 | 109.17614  | 100.767501 | 74.334484  |             |             |             |               |

|                    |              |               |          |          |             |            |            |             |             |             |               |
|--------------------|--------------|---------------|----------|----------|-------------|------------|------------|-------------|-------------|-------------|---------------|
| ENSMUSG00000030107 | 0.252659317  | -1.984734714  | 9.57E-10 | 7.29E-09 | 233.565349  | 527.317309 | 486.890873 | 98.3767409  | 97.2987004  | 119.4487552 | Usp18         |
| ENSMUSG00000044986 | 0.42627343   | -1.230148962  | 9.63E-10 | 7.33E-09 | 686.377865  | 463.726168 | 661.576911 | 281.6681424 | 240.6862589 | 250.1277352 | Tst           |
| ENSMUSG00000020649 | 0.406338602  | -1.299245669  | 9.65E-10 | 7.34E-09 | 197.769893  | 248.494613 | 252.737247 | 90.09238377 | 104.1266794 | 88.82086924 | Hrm2          |
| ENSMUSG00000043099 | 0.358249827  | -1.480962087  | 9.71E-10 | 7.39E-09 | 620.156272  | 493.075925 | 558.747541 | 270.2771513 | 156.1900191 | 73.5580204  | Hic1          |
| ENSMUSG00000030780 | 2.438798278  | 1.286170433   | 9.76E-10 | 7.42E-09 | 488.607972  | 387.416798 | 284.948857 | 888.497302  | 1019.075862 | 930.0668032 | BC017158      |
| ENSMUSG00000065637 | 24.84071018  | 6.634634515   | 9.84E-10 | 7.48E-09 | 3.57954558  | 0          | 4.95563229 | 74.55921415 | 93.88471092 | 36.75346313 | Gm26397       |
| ENSMUSG00000028825 | 8.606847561  | 3.105484917   | 1.00E-09 | 7.63E-09 | 8.94886395  | 2.93497575 | 11.1501727 | 63.1682231  | 73.40077399 | 58.1929833  | Rhd           |
| ENSMUSG00000026104 | 0.344508027  | -1.537390496  | 1.01E-09 | 7.67E-09 | 1221.57107  | 2511.36091 | 1860.83993 | 597.5092579 | 666.5814475 | 659.5204774 | Sta1t         |
| ENSMUSG00000028207 | 2.152295282  | 1.105876021   | 1.03E-09 | 7.78E-09 | 2391.13645  | 2357.76385 | 1584.56342 | 4367.927296 | 4934.921805 | 4334.866791 | Asph          |
| ENSMUSG00000041801 | 0.495309538  | -1.013597691  | 1.04E-09 | 7.90E-09 | 2322.2302   | 2747.1373  | 2737.98684 | 1492.219828 | 1044.680783 | 1331.292109 | Phlda3        |
| ENSMUSG00000037999 | 2.987551302  | 1.578963487   | 1.05E-09 | 7.94E-09 | 214.772735  | 128.160608 | 121.412991 | 519.7798995 | 412.4555307 | Arap2       |               |
| ENSMUSG00000015709 | 0.180031622  | -2.473677763  | 1.05E-09 | 7.97E-09 | 56.3778429  | 68.4827674 | 74.3344844 | 12.42653569 | 10.24196846 | 13.27208391 | Arnt2         |
| ENSMUSG00000083907 | 6.850579365  | 2.776226004   | 1.06E-09 | 8.03E-09 | 14.3181823  | 6.84827674 | 8.67235651 | 57.9904999  | 80.22875297 | 68.40227861 | Plk-ps1       |
| ENSMUSG00000027852 | 0.413127832  | -1.27533984   | 1.07E-09 | 8.11E-09 | 1745.92336  | 2406.68011 | 3035.32478 | 927.8479984 | 1071.139202 | 968.8621254 | Nras          |
| ENSMUSG00000001123 | 0.392894861  | -1.347784796  | 1.07E-09 | 8.11E-09 | 1222.41482  | 1281.60608 | 975.020653 | 460.8173653 | 337.1314619 | 570.6996081 | Lgals9        |
| ENSMUSG00000076031 | 23.81584479  | 4.573849819   | 1.07E-09 | 8.11E-09 | 0           | 1.9566505  | 4.95563229 | 49.70614277 | 52.06333969 | 47.98368798 | Gm22751       |
| ENSMUSG00000031137 | 2.632361488  | 1.39635762    | 1.09E-09 | 8.19E-09 | 127.073868  | 183.925147 | 116.457359 | 389.364785  | 407.1182464 | 330.7811682 | Fgf13         |
| ENSMUSG00000022371 | 0.38657042   | -1.371196845  | 1.09E-09 | 8.24E-09 | 14413.9352  | 7563.4325  | 10080.995  | 4422.811162 | 398.036874  | 4032.67165  | Col14a1       |
| ENSMUSG00000074264 | 0.412787009  | -1.276530528  | 1.10E-09 | 8.29E-09 | 487.7130085 | 375.676895 | 376.628054 | 139.1200716 | 139.1200716 | 186.8301043 | Amy1          |
| ENSMUSG00000033949 | 2.211283848  | 1.144884226   | 1.10E-09 | 8.30E-09 | 164.659097  | 183.925147 | 144.952244 | 353.1207226 | 326.8894935 | 414.4973898 | Trim36        |
| ENSMUSG00000086058 | 0.275015843  | -1.862413364  | 1.11E-09 | 8.39E-09 | 91.2784123  | 91.9625734 | 90.4402893 | 23.81752674 | 23.04442904 | 28.58602688 | Unc45bos      |
| ENSMUSG00000050370 | 0.189595754  | -2.399001438  | 1.12E-09 | 8.45E-09 | 91.2784123  | 90.9842481 | 152.385693 | 14.49762497 | 23.04442904 | 25.52323829 | Ch25h         |
| ENSMUSG00000035455 | 0.233032797  | -2.101395079  | 1.15E-09 | 8.65E-09 | 93.9630715  | 104.680802 | 86.7235651 | 16.56871426 | 29.01891065 | 20.41859063 | Figln1        |
| ENSMUSG00000010848 | 0.060713598  | -4.041836526  | 1.17E-09 | 8.77E-09 | 46.5340926  | 114.464054 | 244.06489  | 8.284357128 | 11.94896321 | 4.083718126 | Gm19514       |
| ENSMUSG00000035131 | 0.004167465  | -7.906614295  | 1.18E-09 | 8.89E-09 | 137.812505  | 53.8078887 | 56.9897713 | 1.035544641 | 0           | 0           | Brinp3        |
| ENSMUSG00000048040 | 0.283644109  | -1.817846194  | 1.19E-09 | 8.93E-09 | 429.54547   | 297.410876 | 584.76461  | 154.296155  | 119.4896321 | 98.00923503 | Axes2         |
| ENSMUSG00000058934 | 0.061308447  | -0.4027770329 | 1.19E-09 | 8.94E-09 | 61.7471613  | 105.659127 | 231.675819 | 15.53316962 | 5.974481604 | 3.062788595 | Igf1os        |
| ENSMUSG00000051314 | 0.110507914  | -3.1777784    | 1.21E-09 | 9.10E-09 | 142.869397  | 150.662088 | 434.856733 | 28.99524995 | 36.70038699 | 14.29301344 | Ffar2         |
| ENSMUSG00000036015 | 0.133506746  | -2.905015448  | 1.22E-09 | 9.15E-09 | 52.7982973  | 52.8295634 | 60.7064956 | 5.177723205 | 6.827978976 | 10.20929532 | Adgrl3        |
| ENSMUSG00000021068 | 0.489942118  | -1.029316776  | 1.24E-09 | 9.32E-09 | 1161.56254  | 896.145928 | 843.696397 | 509.4879634 | 470.277052  | 443.0834167 | Nin           |
| ENSMUSG00000037321 | 0.280984621  | -1.831436924  | 1.24E-09 | 9.32E-09 | 841.193212  | 2139.59732 | 1404.92175 | 399.7202314 | 425.0416912 | 43.50308831 | Tap1          |
| ENSMUSG00000020181 | 0.134072299  | -3.140478211  | 1.25E-09 | 9.36E-09 | 171.818188  | 74.3527189 | 65.6257189 | 9.319901769 | 12.80246068 | 13.27208391 | Nav3          |
| ENSMUSG00000022720 | 0.320618997  | -1.641068187  | 1.27E-09 | 9.53E-09 | 281.889215  | 547.862139 | 390.256043 | 133.5852587 | 128.8781032 | 128.637121  | Fam134b       |
| ENSMUSG00000085146 | 183.6155766  | 7.520544642   | 1.27E-09 | 9.53E-09 | 0           | 0          | 1.23890807 | 63.1682231  | 75.10776873 | 64.31856049 | Eif2c5        |
| ENSMUSG00000006398 | 0.306247622  | -1.707229455  | 1.28E-09 | 9.58E-09 | 126.178982  | 142.835486 | 177.163854 | 54.88386597 | 41.82137123 | 39.81625173 | Cdc20         |
| ENSMUSG00000057135 | 0.066308444  | -3.914663599  | 1.29E-09 | 9.66E-09 | 33.1107966  | 112.507404 | 84.2457489 | 4.142178564 | 6.827978976 | 4.083718126 | Scimp         |
| ENSMUSG00000057143 | 0.392617722  | -1.348802802  | 1.32E-09 | 9.83E-09 | 1054.17617  | 1622.06326 | 191.87406  | 578.8694543 | 610.250621  | 611.5367894 | Trim12c       |
| ENSMUSG00000052516 | 0.056812331  | -4.137652083  | 1.32E-09 | 9.83E-09 | 63.5369341  | 90.0059229 | 30.9727018 | 2.071089282 | 4.26748686  | 4.083718126 | Robo2         |
| ENSMUSG00000031662 | 0.248071261  | -2.011173485  | 1.32E-09 | 9.84E-09 | 161.974438  | 351.218764 | 287.426673 | 71.45258023 | 71.69377925 | 55.1301947  | Smk20         |
| ENSMUSG00000028701 | 2.306984702  | 1.206008437   | 1.32E-09 | 9.84E-09 | 169.133529  | 123.269891 | 138.757002 | 313.7700262 | 369.5643621 | 312.4044366 | Lurap1        |
| ENSMUSG00000040938 | 2.840594246  | 1.506192777   | 1.32E-09 | 9.85E-09 | 112.755686  | 113.485729 | 166.013682 | 339.6586423 | 314.9405303 | 455.3345711 | Slc16a11      |
| ENSMUSG00000032355 | 0.029426301  | -0.5086750012 | 1.33E-09 | 9.88E-09 | 39.3750014  | 289.584274 | 58.2286794 | 4.142178564 | 5.120984232 | 2.041859063 | Mlip          |
| ENSMUSG00000019832 | 0.473487003  | -1.078603271  | 1.33E-09 | 9.89E-09 | 486.818199  | 543.948838 | 551.314092 | 300.3079459 | 229.5907931 | 219.4998493 | Rab32         |
| ENSMUSG00000030474 | 0.189309145  | -2.401183992  | 1.33E-09 | 9.92E-09 | 67.1164797  | 122.290656 | 127.607531 | 22.7819821  | 18.77694218 | 18.37673157 | Siglece       |
| ENSMUSG00000059201 | 0.155701559  | -2.683144705  | 1.34E-09 | 9.98E-09 | 722.173321  | 322.847332 | 278.754316 | 107.6966427 | 46.94235546 | 52.06740611 | Lepp          |
| ENSMUSG00000078485 | 2.156793179  | 1.108887839   | 1.35E-09 | 1.01E-08 | 153.92046   | 162.401991 | 138.757704 | 330.3387405 | 288.4821117 | 365.4927723 | Plekhn1       |
| ENSMUSG00000011012 | 14.3871571   | 3.846709638   | 1.41E-09 | 1.05E-08 | 0.8948864   | 6.84827674 | 6.19454036 | 64.20376774 | 46.08885809 | 84.73715112 | Gm28609       |
| ENSMUSG00000029134 | 3.002439498  | 1.586135174   | 1.43E-09 | 1.06E-08 | 68.0113661  | 58.6995149 | 45.8395987 | 156.3672408 | 202.2788772 | 162.3277955 | Plb1          |
| ENSMUSG00000018593 | 0.491754341  | -1.024515282  | 1.45E-09 | 1.07E-08 | 146856.227  | 124746.252 | 190049.737 | 80680.31853 | 72453.39191 | 73801.9749  | Sparc         |
| ENSMUSG00000068696 | 0.07718978   | -3.685589255  | 1.47E-09 | 1.09E-08 | 41.1647742  | 54.5477917 | 56.9897713 | 4.142178564 | 1.706994744 | 7.146506721 | Gpr88         |
| ENSMUSG00000035923 | 0.014796742  | -6.078576614  | 1.55E-09 | 1.14E-08 | 20.5823871  | 234.79806  | 74.3344844 | 2.071089282 | 0.853497372 | 2.041859063 | Myf6          |
| ENSMUSG00000106438 | 57.04899307  | 5.834129518   | 1.55E-09 | 1.14E-08 | 0           | 0          | 3.71672422 | 45.5639642  | 55.47732918 | 78.61157393 | Gm32051       |
| ENSMUSG00000052229 | 54.48858808  | 2.156512729   | 1.57E-09 | 1.16E-08 | 155.710233  | 72.3960684 | 55.508633  | 461.8529099 | 397.7297753 | 413.4764603 | Gpr17         |
| ENSMUSG00000059456 | 0.463353223  | -1.109815687  | 1.62E-09 | 1.19E-08 | 657.741501  | 837.446413 | 567.860187 | 353.1207226 | 277.3866459 | 368.5556609 | Pktb2         |
| ENSMUSG00000030346 | 0.18044277   | -2.470386753  | 1.63E-09 | 1.20E-08 | 57.2272793  | 70.4394179 | 59.4675875 | 12.42653569 | 10.24196846 | 11.23022485 | Rad51ap1      |
| ENSMUSG00000069862 | 7.043444639  | 2.81628116    | 1.63E-09 | 1.20E-08 | 10.7386367  | 15.653204  | 35.9283341 | 155.3316962 | 173.2599665 | 101.0720236 | Rps12-ps9     |
| ENSMUSG00000074412 | 21.54762853  | 4.429457194   | 1.66E-09 | 1.22E-08 | 0.8948864   | 2.93497575 | 3.71672422 | 42.45733028 | 73.40077399 | 39.81625173 | Gm10689       |
| ENSMUSG00000055435 | 0.378908161  | -1.40007988   | 1.67E-09 | 1.23E-08 | 3086.46318  | 5007.06862 | 6055.78266 | 1841.198372 | 1732.599665 | 1786.62668  | Mip           |
| ENSMUSG00000042817 | 0.081026013  | -3.62547103   | 1.68E-09 | 1.24E-08 | 82.3295844  | 95.8758744 | 92.9181054 | 13.46208033 | 0.853497372 | 8.167436252 | Flt3          |
| ENSMUSG00000041132 | 0.453831109  | -1.139823453  | 1.69E-09 | 1.25E-08 | 305.156261  | 318.934031 | 386.539319 | 156.3672408 | 135.7060821 | 166.4115136 | Nabp21        |
| ENSMUSG00000040809 | 0.191597375  | -2.383850296  | 1.72E-09 | 1.26E-08 | 103.806822  | 247.516288 | 137.518796 | 31.06633923 | 29.01891065 | 33.69067454 | Chl3          |
| ENSMUSG00000103529 | 288.2657897  | 8.171255823   | 1.72E-09 | 1.26E-08 | 0           | 0          | 0          | 41.42178564 | 27.3119159  | 94.94644643 | A730089K16Rik |
| ENSMUSG00000036596 | 0.312143607  | -1.679718174  | 1.73E-09 | 1.27E-08 | 565.568202  | 303.280827 | 469.54616  | 158.4383301 | 110.9546584 | 149.0557116 | Cpz           |
| ENSMUSG00000052572 | 4.593343099  | 2.19954455    | 1.75E-09 | 1.28E-08 | 48.3238654  | 27.393107  | 42.1228745 | 157.4027854 | 132.2920927 | 252.1695943 | Dlg2          |
| ENSMUSG00000069874 | 0.313802196  | -1.672072648  | 1.75E-09 | 1.29E-08 | 931.963214  | 2091.65938 | 1397.48831 | 428.7154814 | 467.7165598 | 486.9833865 | Irgm2         |
| ENSMUSG00000062300 | 0.4795972302 | -1.060104763  | 1.78E-09 | 1.30E-08 | 519.562519  | 454.921241 | 584.76461  | 281.6681424 | 221.0558193 | 251.1486648 | Nection2      |
| ENSMUSG00000032436 | 0.402791161  | -1.311896071  | 1.82E-09 | 1.34E-08 | 304.440356  | 565.471994 | 712.372142 | 242.317446  | 225.3233062 | 219.4998493 | Cmtm7         |
| ENSMUSG00000043903 | 0.257381055  | -1.958022232  | 1.89E-09 | 1.38E-08 | 255.042623  | 185.881797 | 401.406216 | 76.63030344 | 45.6181078  | 78.61157393 |               |

|                     |              |              |          |            |            |            |            |             |             |             |               |
|---------------------|--------------|--------------|----------|------------|------------|------------|------------|-------------|-------------|-------------|---------------|
| ENSMUSG00000091460  | 8.69955819   | 3.120942135  | 2.56E-09 | 1.85E-08   | 4.74443198 | 5.86995149 | 16.1058049 | 84.91466056 | 75.10776873 | 61.25577189 | Gm7808        |
| ENSMUSG00000042066  | 2.068837128  | 1.048820071  | 2.57E-09 | 1.85E-08   | 518.139223 | 646.672989 | 426.184377 | 1052.113355 | 1131.737515 | 1111.79226  | Tmcc2         |
| ENSMUSG00000027456  | 0.312417493  | -1.678452857 | 2.60E-09 | 1.87E-08   | 96.6477307 | 121.312331 | 112.740035 | 34.17297315 | 32.43290013 | 36.75346313 | Sdcbp2        |
| ENSMUSG00000066800  | 0.417843394  | -1.258965767 | 2.60E-09 | 1.88E-08   | 608.522749 | 455.899566 | 431.140069 | 190.5402139 | 189.4764166 | 246.0440171 | Rnasel        |
| ENSMUSG00000054520  | 0.449471678  | -1.153697884 | 2.61E-09 | 1.88E-08   | 345.426149 | 480.357697 | 439.812366 | 175.0070443 | 185.2089297 | 208.2696244 | Sh3bp2        |
| ENSMUSG00000071068  | 4.988294859  | 2.318546746  | 2.61E-09 | 1.88E-08   | 32.2159102 | 76.3093694 | 70.6177601 | 280.6325977 | 201.4253798 | 408.3718126 | TremI2        |
| ENSMUSG00000006369  | 0.396030042  | -1.336318221 | 2.63E-09 | 1.89E-08   | 5830.18487 | 4377.02716 | 5545.35253 | 2508.089121 | 1439.850067 | 2291.986798 | Fbln1         |
| ENSMUSG00000092035  | 5.067445482  | 2.341258663  | 2.64E-09 | 1.90E-08   | 59.0625021 | 43.0463109 | 50.795231  | 221.6065532 | 150.2155375 | 404.2880945 | Peg10         |
| ENSMUSG00000001864  | 0.326839668  | -1.613345005 | 2.65E-09 | 1.90E-08   | 158.394892 | 204.469977 | 252.737247 | 73.52366951 | 70.84028187 | 56.15112423 | Aif1l         |
| ENSMUSG00000020573  | 0.365121248  | -1.453551757 | 2.65E-09 | 1.91E-08   | 205.823871 | 261.212841 | 184.597303 | 80.772482   | 89.61722406 | 67.38134908 | Pik3cg        |
| ENSMUSG00000025855  | 0.323426198  | -1.62849155  | 2.66E-09 | 1.91E-08   | 214.772735 | 183.925147 | 220.525637 | 69.38149095 | 46.94235546 | 84.73715112 | Prkar1b       |
| ENSMUSG00000000531  | 0.477592264  | -1.066148625 | 2.67E-09 | 1.91E-08   | 610.312522 | 735.700587 | 718.566682 | 367.6183476 | 267.1446774 | 352.2206884 | Grasp         |
| ENSMUSG00000072596  | 0.254461747  | -1.9744793   | 2.71E-09 | 1.95E-08   | 156.605119 | 163.380317 | 92.9181054 | 38.31515172 | 31.57940276 | 35.7325336  | Ear2          |
| ENSMUSG00000021175  | 0.196537581  | -2.347122892 | 2.72E-09 | 1.95E-08   | 89.4886395 | 82.1793209 | 59.4675875 | 16.56871426 | 11.94896321 | 17.35580204 | Cdca7l        |
| ENSMUSG00000055216  | 0.162173861  | -2.624386793 | 2.76E-09 | 1.98E-08   | 53.6931837 | 103.702476 | 94.1570135 | 13.46208033 | 11.09546584 | 16.3348725  | 9430025C20Rik |
| ENSMUSG00000051998  | 2.574072802  | 1.364052857  | 2.77E-09 | 1.98E-08   | 80.5397756 | 99.7891754 | 99.1126458 | 194.6823925 | 267.9981748 | 254.2114533 | Lax1          |
| ENSMUSG00000041771  | 22.17801129  | 4.471058099  | 2.83E-09 | 2.02E-08   | 3.57954558 | 0.97832525 | 1.23890807 | 52.81277669 | 38.40738174 | 42.87904032 | Slic2a4       |
| ENSMUSG00000033031  | 0.374452679  | -1.417144684 | 2.84E-09 | 2.03E-08   | 174.502847 | 155.553715 | 142.474428 | 51.77723205 | 64.86580027 | 60.23484236 | C330027C09Rik |
| ENSMUSG00000005716  | 0.011582264  | -6.431938885 | 2.84E-09 | 2.04E-08   | 2903.01147 | 46993.8533 | 9875.33625 | 230.9264549 | 109.2476636 | 352.2206884 | Pvalb         |
| ENSMUSG00000036459  | 2.14804672   | 1.103025372  | 2.86E-09 | 2.04E-08   | 1293.11084 | 1490.96768 | 1942.60786 | 3895.71894  | 3083.686005 | 3167.944336 | Wtip          |
| ENSMUSG00000031443  | 0.099536167  | -3.328635364 | 2.92E-09 | 2.09E-08   | 75.1704572 | 150.662088 | 101.590462 | 8.284357128 | 4.26748686  | 20.41859063 | F7            |
| ENSMUSG00000047976  | 0.325065025  | -1.621199756 | 2.95E-09 | 2.10E-08   | 129.758527 | 118.377355 | 127.607531 | 37.27960708 | 49.50284757 | 34.71160407 | Kcna1         |
| ENSMUSG00000041797  | 0.223766814  | -2.159932004 | 2.95E-09 | 2.11E-08   | 1486.4063  | 809.074981 | 502.996677 | 255.7795263 | 174.1134639 | 197.0393996 | Abca9         |
| ENSMUSG000000339956 | 0.242659814  | -2.042992886 | 3.00E-09 | 2.14E-08   | 597.784112 | 279.801021 | 566.180989 | 142.9051605 | 79.37525559 | 128.637121  | Mrp           |
| ENSMUSG00000018849  | 2.393753156  | 1.259274389  | 3.02E-09 | 2.15E-08   | 124.389209 | 111.529078 | 117.696267 | 316.8766602 | 227.8837983 | 303.2160709 | Wwc1          |
| ENSMUSG00000092203  | 0.478722265  | -1.062739189 | 3.03E-09 | 2.16E-08   | 228.196031 | 260.234516 | 263.887419 | 117.0165444 | 122.0501242 | 120.4696847 | I110038B12Rik |
| ENSMUSG00000026109  | 0.390260712  | -1.374789663 | 3.03E-09 | 2.16E-08   | 441.178993 | 449.051289 | 349.372076 | 187.43358   | 120.3431294 | 177.6417385 | Tmeff2        |
| ENSMUSG00000024696  | 0.225680284  | -2.147647711 | 3.05E-09 | 2.17E-08   | 149.446028 | 283.714322 | 313.443742 | 45.5639642  | 75.10776873 | 46.96275845 | Lpxn          |
| ENSMUSG00000022893  | 2.010116768  | 1.00727931   | 3.06E-09 | 2.17E-08   | 4215.80981 | 3125.74917 | 2829.66604 | 7264.345657 | 6467.803085 | 6719.758177 | Adamts1       |
| ENSMUSG00000053626  | 0.170191606  | -2.554768211 | 3.06E-09 | 2.17E-08   | 498.451722 | 292.519249 | 413.713336 | 60.06158918 | 56.3082655  | 42.87904032 | Tll1          |
| ENSMUSG00000024261  | 0.050647687  | -4.303359791 | 3.06E-09 | 2.17E-08   | 62.6420477 | 43.0463109 | 85.484657  | 0           | 2.560492116 | 7.146506721 | Syt4          |
| ENSMUSG00000036875  | 0.256003209  | -1.9657662   | 3.06E-09 | 2.18E-08   | 180.767052 | 230.884759 | 112.740635 | 45.5639642  | 46.08885804 | 42.87904032 | Dna2          |
| ENSMUSG00000020722  | 0.013205044  | -6.24276705  | 3.08E-09 | 2.18E-08   | 89.4886395 | 934.300612 | 252.737247 | 8.284357128 | 2.560492116 | 6.125577189 | Cacng1        |
| ENSMUSG00000038894  | 2.246124835  | 1.167438112  | 3.08E-09 | 2.19E-08   | 586.150589 | 426.549808 | 635.559841 | 1365.883382 | 1036.999307 | 1297.601435 | Irs2          |
| ENSMUSG00000026938  | 0.288524183  | -1.793235851 | 3.10E-09 | 2.20E-08   | 103.806822 | 137.94386  | 135.04098  | 42.45733028 | 27.56509735 | 27.56509735 | Fcna          |
| ENSMUSG00000047261  | 0.27579828   | -1.858314637 | 3.12E-09 | 2.21E-08   | 123.494323 | 90.9842481 | 133.802072 | 34.17297315 | 34.99339225 | 26.54416782 | Gap43         |
| ENSMUSG00000038822  | 2.206270485  | 1.141609674  | 3.12E-09 | 2.21E-08   | 390.170468 | 281.757672 | 289.904489 | 810.8314539 | 687.0653844 | 627.8716619 | Hace1         |
| ENSMUSG00000031951  | 2.0479692    | 1.034194019  | 3.15E-09 | 2.23E-08   | 148.551142 | 145.770462 | 138.757704 | 265.0994281 | 320.9150119 | 301.1742118 | Tmem231       |
| ENSMUSG00000054675  | 0.393036441  | -1.347265014 | 3.24E-09 | 2.29E-08   | 1455.98017 | 1269.86617 | 1668.80917 | 736.2722398 | 413.092728  | 578.8670444 | Tmem119       |
| ENSMUSG00000000402  | 0.13143879   | -6.217452895 | 3.25E-09 | 2.30E-08   | 50.1136381 | 34.2413837 | 128.8446   | 1.035544641 | 1.706994744 | 0           | Egfl6         |
| ENSMUSG00000068744  | 0.335076303  | -1.577438432 | 3.27E-09 | 2.31E-08   | 144.07671  | 132.073909 | 121.412991 | 53.84832133 | 40.11437648 | 39.81625173 | Psrc1         |
| ENSMUSG00000048138  | 0.056504298  | -4.145495574 | 3.37E-09 | 2.38E-08   | 30.4261374 | 50.8729129 | 54.5119552 | 2.071089282 | 3.413989488 | 2.041859063 | Omrt2         |
| ENSMUSG00000023982  | 0.185589822  | -2.429810503 | 3.37E-09 | 2.38E-08   | 60.8522749 | 74.3527189 | 71.8566682 | 8.284357128 | 13.65595795 | 16.3348725  | Guca1a        |
| ENSMUSG00000022351  | 2.132357595  | 1.092449397  | 3.39E-09 | 2.40E-08   | 221.931826 | 228.928108 | 204.419832 | 412.1467671 | 557.3337839 | 427.7694737 | Sqle          |
| ENSMUSG00000056271  | 0.1758756271 | -2.507372148 | 3.43E-09 | 2.42E-08   | 102.017049 | 170.228593 | 107.785002 | 24.85307138 | 11.94896321 | 30.62788595 | Gpr35         |
| ENSMUSG00000104213  | 8.435869936  | 3.076536852  | 3.44E-09 | 2.43E-08   | 16.1079551 | 30.3280827 | 17.344713  | 127.3719908 | 314.9405303 | 95.96737596 | Ighd          |
| ENSMUSG00000040594  | 2.611755516  | 1.385019854  | 3.50E-09 | 2.46E-08   | 85.9090994 | 67.5044422 | 58.2286794 | 178.1136783 | 184.3554323 | 193.976611  | Ranbp17       |
| ENSMUSG00000086946  | 10.08229389  | 3.33752009   | 3.54E-09 | 2.49E-08   | 6.26420437 | 2.93497575 | 6.19454036 | 39.35069636 | 60.59831341 | 54.10926517 | Gm15527       |
| ENSMUSG00000031298  | 0.305475318  | -1.710872277 | 3.55E-09 | 2.50E-08   | 201.349439 | 134.030559 | 189.552935 | 65.23931238 | 43.52835697 | 52.06740611 | Adgrg2        |
| ENSMUSG00000030249  | 2.250688511  | 1.170366406  | 3.56E-09 | 2.51E-08   | 3952.71321 | 2672.78458 | 2384.89804 | 6614.023622 | 7175.352406 | 6496.174609 | Abcc9         |
| ENSMUSG00000045776  | 0.066244627  | -3.91605275  | 3.57E-09 | 2.51E-08   | 38.480115  | 178.055195 | 73.0955763 | 5.177723205 | 6.827978976 | 7.146506721 | Lrtm1         |
| ENSMUSG00000006273  | 0.434322318  | -1.203162007 | 3.58E-09 | 2.52E-08   | 1582.15915 | 2502.55599 | 2615.33494 | 1012.762659 | 949.942575  | 946.4016757 | Atp6v1b2      |
| ENSMUSG00000027698  | 0.468868391  | -1.092745071 | 3.64E-09 | 2.56E-08   | 376.747172 | 529.27396  | 495.563229 | 221.6065532 | 218.4953272 | 216.4370607 | Nceh1         |
| ENSMUSG00000031997  | 3.765512784  | 1.912846343  | 3.71E-09 | 2.61E-08   | 131.5483   | 100.767501 | 83.0068409 | 386.2581511 | 255.1957142 | 550.2810175 | Trpc6         |
| ENSMUSG00000029005  | 13.4141443   | 3.745683122  | 3.77E-09 | 2.65E-08   | 3.57954558 | 7.82660199 | 14.8668969 | 109.7677319 | 50.35634494 | 183.7673157 | Draxin        |
| ENSMUSG00000090210  | 2.146570669  | 1.10203367   | 3.96E-09 | 2.78E-08   | 499.346609 | 352.19709  | 460.873803 | 798.4049182 | 1027.610836 | 990.3016456 | Igta10        |
| ENSMUSG00000071567  | 2.448043182  | 1.291629007  | 4.02E-09 | 2.81E-08   | 145.864482 | 116.420705 | 190.791843 | 351.0496333 | 358.4688962 | 395.0997287 | NA            |
| ENSMUSG00000020848  | 0.313326857  | -1.674259659 | 4.10E-09 | 2.87E-08   | 201.349439 | 143.813812 | 139.996612 | 52.81277669 | 41.82137123 | 58.19237123 | Cdc2b         |
| ENSMUSG00000026970  | 0.436489356  | -1.195981621 | 4.11E-09 | 2.87E-08   | 3488.26717 | 4333.98085 | 6042.15467 | 2094.906809 | 1944.267013 | 2011.231177 | Rbm21         |
| ENSMUSG00000108929  | 2.042767847  | 4.586625359  | 4.15E-09 | 2.90E-08   | 4.74443198 | 0.97832525 | 0          | 42.45733028 | 44.38186334 | 56.15112423 | Ccd2b2        |
| ENSMUSG00000032377  | 0.489700979  | -1.030027013 | 4.21E-09 | 2.94E-08   | 1039.85799 | 816.901583 | 743.344844 | 463.9239992 | 392.6087911 | 418.5811079 | Plscr4        |
| ENSMUSG00000036995  | 0.469991689  | -1.08929285  | 4.27E-09 | 2.98E-08   | 1076.54833 | 808.096655 | 796.617891 | 462.8884545 | 360.175891  | 438.9996986 | Asa1p2        |
| ENSMUSG00000033470  | 9.727307986  | 3.282040597  | 4.30E-09 | 2.99E-08   | 7.15909116 | 11.739903  | 4.95563229 | 59.02604454 | 54.62383181 | 121.4906143 | Cyslr3        |
| ENSMUSG00000034685  | 0.492562802  | -1.021620415 | 4.36E-09 | 3.03E-08   | 422.386379 | 423.614833 | 541.402828 | 235.0686335 | 210.8138509 | 236.8556513 | Fam171a2      |
| ENSMUSG00000024379  | 0.200903383  | -2.315447779 | 4.45E-09 | 3.10E-08   | 67.1164797 | 92.9408986 | 105.307186 | 23.81752674 | 16.21645007 | 13.27208391 | Tslp          |
| ENSMUSG000000505410 | 0.409393248  | -1.28844431  | 4.48E-09 | 3.12E-08   | 261.306827 | 262.191167 | 236.631442 | 82.84357128 | 125.4641137 | 102.0929532 | Mcm5          |
| ENSMUSG00000052914  | 0.409076248  | -1.289558322 | 4.73E-09 | 3.29E-08   | 442.968766 | 346.327138 | 328.310639 | 181.2203122 | 126.3176111 | 151.0975707 | Cyp2b6        |
| ENSMUSG00000030559  | 0.201162279  | -2.313568289 | 4.75E-09 | 3.30E-08</ |            |            |            |             |             |             |               |

|                     |             |              |          |          |            |            |            |             |             |             |               |
|---------------------|-------------|--------------|----------|----------|------------|------------|------------|-------------|-------------|-------------|---------------|
| ENSMUSG00000046718  | 0.266408216 | -1.90828952  | 7.69E-09 | 5.22E-08 | 1236.733   | 3098.35606 | 3555.66617 | 700.0281773 | 713.523803  | 688.1065042 | Bst2          |
| ENSMUSG00000036095  | 2.154257945 | -1.107191005 | 7.73E-09 | 5.24E-08 | 565.568202 | 384.481823 | 376.628054 | 988.9451322 | 911.5351933 | 962.7365482 | Dgkb          |
| ENSMUSG00000025784  | 0.458557359 | -1.124825889 | 7.86E-09 | 5.33E-08 | 5379.16212 | 6308.2412  | 8349.0015  | 3471.145637 | 2601.45999  | 3114.856001 | Clec3b        |
| ENSMUSG00000027224  | 0.047430404 | -4.398043836 | 8.05E-09 | 5.45E-08 | 44.7443198 | 30.3280827 | 68.139944  | 1.035544641 | 1.706994744 | 1.083718126 | Duoxa1        |
| ENSMUSG00000021943  | 0.449338286 | -1.154126104 | 8.08E-09 | 5.47E-08 | 9568.12534 | 7159.38417 | 8636.42817 | 4435.237697 | 2822.515809 | 4140.89018  | Gdf10         |
| ENSMUSG00000020185  | 0.187845757 | -2.484019099 | 8.15E-09 | 5.52E-08 | 59.0625021 | 76.3093694 | 87.9624732 | 10.35546641 | 18.77694218 | 10.20929532 | E2f7          |
| ENSMUSG00000032261  | 4.281682968 | 2.098177977  | 8.70E-09 | 5.88E-08 | 283.678987 | 239.689686 | 262.648511 | 827.4001682 | 645.2440132 | 1893.824281 | Sh3bgrl2      |
| ENSMUSG00000062081  | 8.875022629 | 3.149750798  | 8.73E-09 | 5.89E-08 | 4.74443198 | 5.86995149 | 4.95563229 | 39.35069636 | 45.23536071 | 51.04647658 | Gm6055        |
| ENSMUSG00000041827  | 0.096232795 | -3.377327554 | 8.88E-09 | 5.99E-08 | 57.2727293 | 282.735997 | 284.948857 | 14.49762497 | 17.06994744 | 28.58602688 | Oasl1         |
| ENSMUSG00000058715  | 0.335165344 | -1.577055113 | 8.91E-09 | 6.01E-08 | 1043.43754 | 2087.74608 | 2150.74441 | 639.9665882 | 504.4169468 | 625.8298028 | Fcer1g        |
| ENSMUSG00000099974  | 0.117122498 | -3.09390864  | 9.17E-09 | 6.18E-08 | 42.954547  | 103.702476 | 58.2286794 | 7.248812487 | 8.53497372  | 8.167436252 | Bcl2a1d       |
| ENSMUSG00000000982  | 0.076148888 | -3.715033222 | 9.23E-09 | 6.21E-08 | 51.9034109 | 225.014807 | 104.068278 | 4.142178564 | 15.3629527  | 9.188365784 | Ccl3          |
| ENSMUSG00000021194  | 0.046461844 | -4.427809765 | 9.48E-09 | 6.38E-08 | 32.2159102 | 38.1546847 | 55.7508633 | 3.106633923 | 0.853497372 | 2.041859063 | Chga          |
| ENSMUSG00000036957  | 2.253321747 | -1.172053328 | 9.54E-09 | 6.41E-08 | 109.17614  | 102.724151 | 130.085348 | 239.2108121 | 238.1257668 | 290.9649165 | Lrnf3         |
| ENSMUSG00000031101  | 0.303191749 | -1.721697603 | 9.56E-09 | 6.42E-08 | 158.394892 | 293.497575 | 216.808913 | 67.31040167 | 76.81476348 | 58.1929833  | Sash3         |
| ENSMUSG00000030672  | 0.010700139 | -6.546226627 | 9.58E-09 | 6.44E-08 | 223.990065 | 31351.4109 | 4522.01447 | 184.3269461 | 57.18432392 | 166.4115136 | Mylpf         |
| ENSMUSG00000028542  | 4.522638141 | 2.17716457   | 9.60E-09 | 6.45E-08 | 292.627851 | 152.618739 | 81.7679328 | 746.6276862 | 809.969006  | 835.1203568 | Sic6a9        |
| ENSMUSG00000020642  | 0.425493533 | -1.232790889 | 9.64E-09 | 6.47E-08 | 475.184676 | 408.939954 | 651.665646 | 217.4643746 | 206.546364  | 228.6882151 | Rnf144a       |
| ENSMUSG00000026958  | 0.499915559 | -1.000243576 | 9.82E-09 | 6.58E-08 | 747.23014  | 616.344907 | 664.054727 | 399.7202314 | 292.7495986 | 322.613732  | Dpp7          |
| ENSMUSG00000058290  | 0.390761533 | -1.355639643 | 9.85E-09 | 6.60E-08 | 161.974438 | 137.94386  | 142.474428 | 51.77723205 | 58.89131867 | 62.27670142 | Esp1          |
| ENSMUSG00000079588  | 0.091483426 | -3.450345798 | 9.94E-09 | 6.66E-08 | 109.17614  | 731.787286 | 193.269659 | 34.17297315 | 29.87240802 | 30.62788595 | Tmem182       |
| ENSMUSG00000031461  | 0.010061413 | -6.635023321 | 9.94E-09 | 6.66E-08 | 323.948875 | 5481.55637 | 581.788521 | 31.06633923 | 11.94896321 | 22.4604969  | Myom2         |
| ENSMUSG00000031824  | 0.495606417 | -1.012733227 | 9.97E-09 | 6.68E-08 | 478.764222 | 464.704493 | 476.979608 | 283.7392316 | 204.839693  | 216.4370607 | G430548M08Rik |
| ENSMUSG00000027792  | 3.18574102  | -1.67162899  | 1.01E-08 | 6.74E-08 | 415.227287 | 210.339928 | 198.225922 | 796.3338289 | 989.2034581 | 844.3087226 | Bche          |
| ENSMUSG00000068794  | 0.227946626 | -2.133234354 | 1.03E-08 | 6.85E-08 | 325.738648 | 166.315292 | 144.952244 | 50.74168741 | 53.77033443 | 40.83718126 | Col28a1       |
| ENSMUSG00000079343  | 0.128015127 | -2.965613794 | 1.05E-08 | 6.98E-08 | 60.8522749 | 40.1113352 | 48.1371487 | 5.177723205 | 7.681476348 | 6.125577189 | C1s2          |
| ENSMUSG00000056116  | 0.428427014 | -1.222878645 | 1.05E-08 | 7.02E-08 | 1791.56256 | 1310.6408  | 2917.62851 | 1105.961677 | 1108.693086 | 1143.441075 | HL-T22        |
| ENSMUSG00000048163  | 0.37018699  | -1.433673901 | 1.06E-08 | 7.04E-08 | 491.292631 | 902.994205 | 669.010359 | 294.094678  | 227.0303009 | 242.9812285 | Selplg        |
| ENSMUSG00000029059  | 0.314306243 | -1.669757165 | 1.06E-08 | 7.10E-08 | 374.9574   | 271.025708 | 413.795296 | 169.8293211 | 129.7316005 | 175.5998794 | Fam213b       |
| ENSMUSG00000002058  | 2.091464931 | -1.064641042 | 1.14E-08 | 7.59E-08 | 221.931826 | 278.822696 | 237.87035  | 442.1775617 | 503.5634495 | 599.285635  | Ucn119        |
| ENSMUSG00000024736  | 2.141788114 | -1.098815762 | 1.14E-08 | 7.63E-08 | 339.161944 | 262.191167 | 218.047821 | 570.5850972 | 601.7156472 | 588.0554102 | Tmem132a      |
| ENSMUSG00000002489  | 0.449046837 | -1.155062165 | 1.15E-08 | 7.65E-08 | 333.792625 | 336.543886 | 303.532478 | 173.9714997 | 117.782373  | 147.0138525 | Tiam1         |
| ENSMUSG00000001020  | 0.395301523 | -1.338974581 | 1.16E-08 | 7.70E-08 | 1251.05118 | 2156.22885 | 2306.84683 | 814.9736325 | 704.1353319 | 739.1529808 | S100a4        |
| ENSMUSG00000029299  | 0.322170467 | -1.634103844 | 1.16E-08 | 7.70E-08 | 120.809663 | 123.268981 | 135.04098  | 30.03079459 | 41.82137123 | 50.02554704 | Abcg3         |
| ENSMUSG00000030711  | 0.463495301 | -1.109373974 | 1.16E-08 | 7.70E-08 | 1717.28699 | 1390.20018 | 1304.5702  | 830.5068021 | 663.167458  | 552.3228761 | Sult1a1       |
| ENSMUSG00000006378  | 2.086833373 | 1.06131541   | 1.16E-08 | 7.72E-08 | 114.545459 | 106.637452 | 104.068278 | 244.3885333 | 219.3488246 | 216.4370607 | Gcat          |
| ENSMUSG000000100862 | 2.390281218 | 1.257180362  | 1.16E-08 | 7.72E-08 | 112.755686 | 142.835486 | 111.501727 | 325.1610173 | 239.8327615 | 681.10925   | Gm10925       |
| ENSMUSG00000051076  | 142.1633621 | 7.151405895  | 1.19E-08 | 7.89E-08 | 0          | 0.97832525 | 0          | 46.59950885 | 57.18432392 | 53.08833564 | Vtcn1         |
| ENSMUSG00000001228  | 0.27109583  | -1.883125171 | 1.22E-08 | 8.13E-08 | 131.5483   | 275.88772  | 203.180924 | 60.06158918 | 56.33082655 | 49.00461751 | Uhrf1         |
| ENSMUSG00000038555  | 2.268763168 | -1.181906017 | 1.26E-08 | 8.36E-08 | 132.444317 | 109.572428 | 116.457359 | 318.9477494 | 250.9282274 | 245.0230876 | Reep2         |
| ENSMUSG00000028458  | 2.083333209 | -1.058893603 | 1.26E-08 | 8.37E-08 | 343.663676 | 355.132065 | 242.825982 | 673.1040167 | 604.2761394 | 690.1483633 | Tesk1         |
| ENSMUSG00000033082  | 0.390325589 | -1.35725589  | 1.28E-08 | 8.49E-08 | 421.491492 | 342.413837 | 286.187731 | 168.7937765 | 123.7571189 | 118.478257  | Clec1a        |
| ENSMUSG00000024292  | 7.023710851 | 2.812233454  | 1.29E-08 | 8.59E-08 | 10.7386367 | 7.82660199 | 14.8668969 | 77.66584808 | 48.6493502  | 106.1766713 | Cyp4f14       |
| ENSMUSG00000073198  | 4.831059841 | 2.272339723  | 1.32E-08 | 8.73E-08 | 16.1079551 | 11.739903  | 11.1501727 | 68.34594631 | 59.74481604 | 62.27670142 | Bnip3l-ps     |
| ENSMUSG00000078945  | 0.299321462 | -1.740232368 | 1.36E-08 | 9.01E-08 | 204.034098 | 253.386239 | 135.04098  | 54.88386597 | 54.62383181 | 68.4027861  | Nalp2         |
| ENSMUSG00000020695  | 0.489055669 | -1.031929398 | 1.39E-08 | 9.22E-08 | 339.71603  | 2823.44667 | 4451.3967  | 1725.217372 | 1656.638399 | 1808.0662   | Mrc2          |
| ENSMUSG00000048120  | 2.498695775 | 1.321175259  | 1.41E-08 | 9.31E-08 | 3321.39218 | 3015.19842 | 1963.6693  | 7288.163184 | 7830.838388 | 7127.10906  | Entpd1        |
| ENSMUSG00000024579  | 2.014321713 | 1.010294119  | 1.45E-08 | 9.56E-08 | 175.397733 | 218.16653  | 243.781615 | 441.1420171 | 416.5067325 | 429.8113328 | Ppxox1l       |
| ENSMUSG00000048922  | 0.267326239 | -1.903226645 | 1.46E-08 | 9.63E-08 | 71.5909116 | 93.9192239 | 97.8737377 | 25.88861603 | 23.89792642 | 20.41859063 | Cdca2         |
| ENSMUSG00000008565  | 75.99213182 | 6.247778145  | 1.48E-08 | 9.78E-08 | 0.8948864  | 0          | 1.23890807 | 50.74168741 | 56.33082655 | 47.98368798 | Gm15721       |
| ENSMUSG00000089617  | 173.4288661 | 7.438200235  | 1.48E-08 | 9.78E-08 | 0          | 0          | 1.23890807 | 104.5900087 | 50.35634495 | 36.75346313 | Scarna10      |
| ENSMUSG00000024986  | 0.412146448 | -1.278771033 | 1.49E-08 | 9.83E-08 | 306.946034 | 321.869007 | 390.256043 | 139.7985265 | 110.101161  | 170.4952318 | Hhex          |
| ENSMUSG00000023341  | 0.205796984 | -2.280706255 | 1.50E-08 | 9.85E-08 | 133.338073 | 247.516288 | 258.931787 | 39.35069636 | 27.3119159  | 65.3394902  | Mx2           |
| ENSMUSG00000021416  | 0.147812662 | -2.758158231 | 1.51E-08 | 9.95E-08 | 53.6931837 | 63.5911412 | 47.0785068 | 8.284357128 | 5.120984232 | 11.23022485 | Eci3          |
| ENSMUSG00000051220  | 0.159395838 | -2.649314132 | 1.54E-08 | 1.01E-07 | 74.2755708 | 63.5911412 | 52.0341391 | 9.319901769 | 14.50945532 | 6.125577189 | Erc6l         |
| ENSMUSG00000028396  | 0.012600693 | -6.310353107 | 1.56E-08 | 1.02E-07 | 27.7414783 | 249.472938 | 37.1672422 | 2.071089282 | 0           | 2.041859063 | 2310002L09Rik |
| ENSMUSG00000054966  | 8.531259039 | 3.09275867   | 1.58E-08 | 1.04E-07 | 6.26420477 | 4.89162624 | 6.19454036 | 35.20851779 | 57.18432392 | 55.1301947  | Lmntd1        |
| ENSMUSG00000000627  | 0.220833244 | -2.218970247 | 1.60E-08 | 1.05E-07 | 79.6448892 | 61.6344907 | 91.6794137 | 21.74643746 | 14.50945532 | 15.31394297 | Sema4f        |
| ENSMUSG00000008658  | 0.09126387  | -3.453812354 | 1.62E-08 | 1.06E-07 | 116.335231 | 840.381389 | 214.331097 | 39.35069636 | 29.87240802 | 37.77439267 | Rboxf1        |
| ENSMUSG00000101445  | 3.427127341 | 1.776999799  | 1.64E-08 | 1.08E-07 | 38.80115   | 22.5014807 | 34.689426  | 110.7165444 | 100.7126899 | 110.2603894 | Gm28932       |
| ENSMUSG00000026399  | 0.373541018 | -1.420661421 | 1.65E-08 | 1.08E-07 | 986.164808 | 1016.47993 | 704.938693 | 335.5164637 | 434.4301623 | 240.9393694 | Cd55          |
| ENSMUSG00000017453  | 4.653214369 | 2.21827652   | 1.66E-08 | 1.08E-07 | 69.8011388 | 49.8948577 | 23.5392534 | 237.1397228 | 164.7249928 | 271.5672554 | Pipox         |
| ENSMUSG00000014786  | 0.394555926 | -1.341698286 | 1.67E-08 | 1.09E-07 | 169.133529 | 215.231555 | 188.314027 | 61.09713382 | 83.6427425  | 80.65343299 | Sic9a5        |
| ENSMUSG00000098975  | 136.0155586 | 7.087627878  | 1.70E-08 | 1.11E-07 | 0          | 0          | 1.23890807 | 47.63505349 | 55.47732918 | 46.96275845 | Gm27177       |
| ENSMUSG00000028871  | 0.260926231 | -1.93828611  | 1.71E-08 | 1.11E-07 | 125.284095 | 110.550753 | 100.351554 | 28.99524995 | 19.63043956 | 39.81625173 | Rspo1         |
| ENSMUSG00000038754  | 97.53428556 | 6.607837544  | 1.74E-08 | 1.13E-07 | 0.8948864  | 0.97832525 | 0          | 47.63505349 | 40.11437648 | 109.2394599 | Elovl3        |
| ENSMUSG00000031442  | 0.416214956 | -1.264599288 | 1.76E-08 | 1.15E-07 | 400.909105 | 314.042405 | 257.692879 | 142.9051605 | 126.3176111 | 136.8045572 | Mrcf2         |
| ENSMUSG00000029093  | 0.04184188  | -1.255522392 | 1.76E-08 | 1.15E-07 | 601.363658 | 408.939954 | 448.484722 | 235.0686335 |             |             |               |

|                    |             |              |          |          |            |            |             |             |              |            |             |          |
|--------------------|-------------|--------------|----------|----------|------------|------------|-------------|-------------|--------------|------------|-------------|----------|
| ENSMUSG00000070780 | 0.239958807 | -2.05914133  | 2.49E-08 | 1.60E-07 | 185.241484 | 278.822696 | 389.017135  |             | 72.48812487  | 42.6748686 | 89.84179877 | Rbm47    |
| ENSMUSG00000093672 | 3.612589461 | 1.853033315  | 2.49E-08 | 1.60E-07 | 40.2698878 | 36.1980342 | 19.8225292  | 125.3009016 | 122.9036216  |            | 104.1348122 | Gm20655  |
| ENSMUSG00000049580 | 0.431936744 | -1.211108045 | 2.50E-08 | 1.60E-07 | 540.511383 | 474.487746 | 641.754382  | 240.2463567 | 186.9159245  |            | 288.9230574 | Tsku     |
| ENSMUSG00000018459 | 0.059265652 | -0.076659963 | 2.51E-08 | 1.61E-07 | 34.9005694 | 57.7211897 | 84.2457489  | 5.177723205 | 5.120984232  |            | 0           | Slc13a3  |
| ENSMUSG00000078552 | 2.517638379 | 1.332071076  | 2.52E-08 | 1.62E-07 | 59.9573885 | 64.5694664 | 54.5119552  | 132.5497141 | 164.7249928  |            | 154.1603593 | Dcdc2b   |
| ENSMUSG00000029864 | 0.263998964 | -1.921395827 | 2.53E-08 | 1.63E-07 | 135.127846 | 127.182282 | 102.82937   | 39.35069636 | 37.55388437  |            | 19.3976611  | Cdc7     |
| ENSMUSG00000020354 | 3.103846032 | 1.634056993  | 2.59E-08 | 1.66E-07 | 371.377854 | 188.816773 | 187.075119  | 770.4452129 | 901.2932248  |            | 652.3739706 | Sgcd     |
| ENSMUSG00000057729 | 0.080394638 | -3.636756914 | 2.63E-08 | 1.68E-07 | 75.1704572 | 58.6995149 | 69.3788521  | 10.35544641 | 5.974481604  |            | 0           | Prtm3    |
| ENSMUSG00000061723 | 0.010948708 | -6.513095491 | 2.69E-08 | 1.72E-07 | 4149.58822 | 70413.0031 | 8527.40426  | 374.86716   | 151.0690348  |            | 383.8695039 | Tntn3    |
| ENSMUSG00000047959 | 10.10021355 | 3.336313891  | 2.77E-08 | 1.77E-07 | 14.3181823 | 3.91330099 | 2.47781615  | 63.1682231  | 64.86580027  |            | 88.82086924 | Kcna3    |
| ENSMUSG00000021234 | 3.385021455 | 1.759164978  | 2.79E-08 | 1.78E-07 | 29.531251  | 35.219709  | 21.0614372  | 101.4833748 | 100.7126899  |            | 90.86272831 | Fam161b  |
| ENSMUSG00000046314 | 0.43643188  | -1.196171606 | 2.80E-08 | 1.79E-07 | 493.97729  | 375.676895 | 315.921559  | 170.8648658 | 168.9924796  |            | 178.662668  | Stxbp6   |
| ENSMUSG00000041020 | 2.190538399 | 1.131285504  | 2.81E-08 | 1.79E-07 | 211.193189 | 142.835486 | 158.580233  | 388.3292404 | 390.9017964  |            | 346.0951112 | Map7d2   |
| ENSMUSG00000009741 | 2.006980097 | 1.005026309  | 2.81E-08 | 1.80E-07 | 2285.53985 | 1721.85244 | 1440.85009  | 3498.069797 | 3673.452689  |            | 3769.27183  | Ubp1     |
| ENSMUSG00000075122 | 0.196556828 | -2.346981613 | 2.88E-08 | 1.84E-07 | 54.5880701 | 81.2009956 | 92.9181054  | 14.49762497 | 18.77694218  |            | 11.23022485 | Cd80     |
| ENSMUSG00000051985 | 0.00188153  | -9.053877829 | 2.90E-08 | 1.85E-07 | 47.428979  | 829.619811 | 178.402762  | 1.035544641 | 0            |            | 1.020929532 | Igfn1    |
| ENSMUSG00000026587 | 0.116438748 | -3.102356866 | 2.91E-08 | 1.85E-07 | 66.2215933 | 37.1763594 | 79.2901166  | 10.35544641 | 6.827978976  |            | 4.083718126 | Astn1    |
| ENSMUSG00000027875 | 3.1638952   | 1.661701813  | 3.06E-08 | 1.95E-07 | 432.230129 | 279.801021 | 550.075184  | 1319.283873 | 920.070167   |            | 1750.894147 | Hmgs2    |
| ENSMUSG00000034714 | 0.295145511 | -1.760501695 | 3.12E-08 | 1.99E-07 | 354.375013 | 329.695609 | 437.33455   | 130.4786248 | 61.45180178  |            | 139.8673458 | Ttth2    |
| ENSMUSG00000027737 | 0.078620365 | -3.66895313  | 3.15E-08 | 2.00E-07 | 45.6392062 | 357.088716 | 123.890807  | 13.46208033 | 13.65595795  |            | 14.29301344 | Slc7a11  |
| ENSMUSG00000021643 | 0.298998783 | -1.741788482 | 3.15E-08 | 2.00E-07 | 230.88069  | 330.673934 | 516.624666  | 120.1231784 | 100.7126899  |            | 101.0720236 | Serf1    |
| ENSMUSG00000068457 | 2.585997881 | 1.370721093  | 3.17E-08 | 2.01E-07 | 236.250008 | 125.225632 | 173.44713   | 468.0661777 | 428.4556807  |            | 489.0252456 | Uty      |
| ENSMUSG00000025235 | 2.17772179  | 1.122819657  | 3.17E-08 | 2.01E-07 | 174.502847 | 149.683763 | 122.651899  | 287.8814102 | 344.8129383  |            | 344.0532521 | Bbs4     |
| ENSMUSG00000048521 | 0.129993521 | -2.943487631 | 3.19E-08 | 2.03E-07 | 45.6392062 | 119.35568  | 75.573924   | 8.284357128 | 14.50945502  |            | 8.167436252 | Cxcr6    |
| ENSMUSG00000030867 | 0.254321436 | -1.975275025 | 3.23E-08 | 2.05E-07 | 77.8551164 | 90.9842481 | 116.457359  | 19.67534818 | 30.72590539  |            | 21.43952016 | Plk1     |
| ENSMUSG00000009731 | 0.391233705 | -1.35389743  | 3.25E-08 | 2.06E-07 | 151.235801 | 149.683763 | 196.986384  | 57.9904999  | 65.71929764  |            | 70.44413768 | Kcnd1    |
| ENSMUSG00000014704 | 2.126686907 | 1.088609485  | 3.29E-08 | 2.08E-07 | 102.911935 | 116.420705 | 96.6348297  | 246.4596246 | 210.8375007  |            | 216.4370607 | Hoxa2    |
| ENSMUSG00000034872 | 3.840687343 | 3.060166279  | 3.31E-08 | 2.09E-07 | 9.84375035 | 2.93497575 | 4.95563229  | 49.70614277 | 46.94235546  |            | 54.10926517 | Gipc3    |
| ENSMUSG00000056569 | 0.273614764 | -1.869782015 | 3.31E-08 | 2.10E-07 | 583.46593  | 1390.20018 | 603.348231  | 264.0638835 | 216.7883325  |            | 224.6044969 | Mpz      |
| ENSMUSG00000027715 | 0.426767159 | -1.228478935 | 3.35E-08 | 2.12E-07 | 237.144895 | 335.56556  | 324.593915  | 110.8032766 | 130.5850979  |            | 140.8882754 | Ccna2    |
| ENSMUSG00000001281 | 0.251476091 | -1.991506853 | 3.37E-08 | 2.13E-07 | 160.184665 | 414.809905 | 250.259431  | 69.38149095 | 71.69377925  |            | 66.36041955 | Itgb7    |
| ENSMUSG00000030306 | 2.197026665 | 1.13555238   | 3.48E-08 | 2.19E-07 | 2399.19043 | 1880.3413  | 1409.379439 | 4609.209197 | 4220.544504  |            | 3676.367243 | Tmtc1    |
| ENSMUSG00000041688 | 0.392961217 | -1.347541161 | 3.54E-08 | 2.23E-07 | 289.943192 | 389.373449 | 237.87035   | 131.5141694 | 121.1966268  |            | 108.2185303 | Amot     |
| ENSMUSG00000104876 | 0.135341604 | -2.8853227   | 3.66E-08 | 2.30E-07 | 47.428979  | 50.8729129 | 45.8395987  | 7.248812487 | 3.413989488  |            | 9.188365784 | Trdc     |
| ENSMUSG00000020010 | 0.178307079 | -2.487564173 | 3.67E-08 | 2.31E-07 | 88.5937531 | 85.1142966 | 74.3344844  | 15.53316962 | 6.827978976  |            | 22.46044969 | Vnn3     |
| ENSMUSG00000095788 | 0.149818562 | -2.738711714 | 3.87E-08 | 2.43E-07 | 65.3267069 | 136.965535 | 55.7508633  | 13.46208033 | 11.09546584  |            | 14.29301344 | Sirpba1  |
| ENSMUSG00000023728 | 0.423221671 | -1.240514591 | 3.87E-08 | 2.43E-07 | 754.389231 | 1334.43564 | 1232.71353  | 475.3149902 | 475.3980362  |            | 454.3136415 | Fam49b   |
| ENSMUSG00000037466 | 0.176125336 | -2.505325637 | 3.88E-08 | 2.43E-07 | 67.1164797 | 92.9408986 | 79.2901166  | 19.67534818 | 16.21645007  |            | 6.125577189 | Tedc1    |
| ENSMUSG00000049401 | 0.434135743 | -1.203781889 | 3.94E-08 | 2.47E-07 | 1094.44606 | 1659.23962 | 1977.29728  | 682.4239184 | 691.3328713  |            | 678.9181385 | Ogfr     |
| ENSMUSG00000040584 | 0.30067429  | -1.733726581 | 4.06E-08 | 2.55E-07 | 595.099453 | 433.398085 | 257.692879  | 147.047339  | 110.9546584  |            | 129.6580505 | Acb1a    |
| ENSMUSG00000061451 | 0.16464003  | -2.602612948 | 4.15E-08 | 2.60E-07 | 56.3778429 | 57.7211897 | 58.2286794  | 7.248812487 | 14.50945502  |            | 6.125577189 | Tmem151a |
| ENSMUSG00000017417 | 0.162540153 | -2.621131938 | 4.19E-08 | 2.62E-07 | 74.2755708 | 81.2009956 | 136.279888  | 7.681476348 | 21.43952016  |            | 16.03452016 | Pldc1    |
| ENSMUSG00000090799 | 0.107366372 | -3.219385901 | 4.20E-08 | 2.63E-07 | 71.5909116 | 223.058157 | 64.4232198  | 9.319901769 | 11.94896321  |            | 17.35580204 | Khlh33   |
| ENSMUSG00000025558 | 0.408689243 | -1.290923824 | 4.27E-08 | 2.67E-07 | 3737.94047 | 2382.22198 | 1947.56349  | 1139.099105 | 1071.992699  |            | 1087.289951 | Dock9    |
| ENSMUSG00000028464 | 2.366482877 | 1.224338464  | 4.33E-08 | 2.70E-07 | 17954.1058 | 34027.1305 | 22642.2839  | 58035.02832 | 55445.74978  |            | 60875.98611 | Tpm2     |
| ENSMUSG00000027315 | 0.022561201 | -5.470012296 | 4.37E-08 | 2.73E-07 | 31.3210238 | 47.9379372 | 50.795231   | 3.106633923 | 0            |            | 0           | Spint1   |
| ENSMUSG00000007080 | 0.260630861 | -1.939920173 | 4.38E-08 | 2.73E-07 | 143.181823 | 123.268981 | 80.5290247  | 23.81752674 | 34.99339225  |            | 31.64881548 | Pole     |
| ENSMUSG00000031097 | 0.012096799 | -6.369230889 | 4.44E-08 | 2.77E-07 | 1533.83528 | 25369.9303 | 3493.72076  | 164.6515979 | 52.06333969  |            | 151.0975707 | Tnni2    |
| ENSMUSG00000060678 | 28.50228918 | 4.833916705  | 4.50E-08 | 2.81E-07 | 0          | 0.97832525 | 3.71672422  | 42.45733028 | 33.2863971   |            | 43.8996986  | Hist1h4c |
| ENSMUSG00000019194 | 0.393371972 | -1.346033928 | 4.63E-08 | 2.88E-07 | 1831.83245 | 3515.12262 | 2158.177686 | 1089.392962 | 883.36978    |            | 980.0923503 | Scn1b    |
| ENSMUSG00000000223 | 0.228908102 | -2.127159569 | 4.68E-08 | 2.91E-07 | 175.397733 | 273.93107  | 117.696267  | 31.06633923 | 54.62383181  |            | 43.8996986  | Drp2     |
| ENSMUSG00000043631 | 2.805763025 | 1.488393164  | 4.68E-08 | 2.91E-07 | 2392.03133 | 1223.88489 | 1129.88416  | 4328.576599 | 4628.516248  |            | 4364.473747 | Ecm2     |
| ENSMUSG00000028600 | 0.389156935 | -1.361576028 | 4.77E-08 | 2.97E-07 | 3513.32399 | 2150.3589  | 2122.54953  | 1193.982971 | 770.708129   |            | 1066.87136  | Podn     |
| ENSMUSG00000058163 | 0.105451819 | -3.245344109 | 4.81E-08 | 2.99E-07 | 68.0113661 | 135.98721  | 69.3788521  | 13.46208033 | 2.560492116  |            | 13.27208391 | Gm5431   |
| ENSMUSG00000031609 | 0.239911453 | -2.059426066 | 4.87E-08 | 3.02E-07 | 93.0681851 | 214.253229 | 147.430061  | 34.17297315 | 40.96787385  |            | 33.69067454 | Sap30    |
| ENSMUSG00000062753 | 0.454160726 | -1.138725142 | 4.89E-08 | 3.03E-07 | 324.843762 | 370.785269 | 475.7407    | 157.4027854 | 190.3299139  |            | 182.7463861 | Alh13582 |
| ENSMUSG00000022408 | 0.043997154 | -4.339428277 | 4.91E-08 | 3.04E-07 | 37.5852286 | 38.1546847 | 64.4232198  | 2.071089282 | 0            |            | 5.104647658 | Fam83f   |
| ENSMUSG00000022876 | 0.25004002  | -1.999765834 | 5.06E-08 | 3.14E-07 | 110.071027 | 250.451264 | 143.27143   | 40.386241   | 52.91683706  |            | 39.81625173 | Samsn1   |
| ENSMUSG00000010419 | 183.8505907 | 7.522390002  | 5.08E-08 | 3.15E-07 | 0          | 0          | 0           | 19.67534818 | 26.45841853  |            | 58.1929833  | Gm30292  |
| ENSMUSG00000056413 | 0.304771542 | -1.714199899 | 5.25E-08 | 3.25E-07 | 168.238642 | 341.435512 | 309.727018  | 92.16347305 | 107.84028187 |            | 86.77901018 | Adap1    |
| ENSMUSG00000074151 | 0.310843508 | -1.685739649 | 5.28E-08 | 3.27E-07 | 457.286948 | 1005.71836 | 505.474494  | 188.4691247 | 209.1068561  |            | 214.3952016 | Nlrc5    |
| ENSMUSG00000063275 | 2.179187817 | 1.123790543  | 5.33E-08 | 3.29E-07 | 427.755697 | 736.678912 | 578.57007   | 1320.319417 | 1265.736603  |            | 1210.822424 | Hacd1    |
| ENSMUSG00000057068 | 42.46679557 | 5.408263346  | 5.56E-08 | 3.43E-07 | 0          | 1.9566505  | 1.23890807  | 57.9904999  | 45.23536071  |            | 27.56509735 | Fam47e   |
| ENSMUSG00000022440 | 0.480456383 | -1.057522628 | 5.60E-08 | 3.45E-07 | 1867.62791 | 1754.13717 | 2709.49195  | 948.5588912 | 1117.22806   |            | 973.9667731 | C1qtnf6  |
| ENSMUSG00000048327 | 0.294843662 | -1.761977914 | 5.70E-08 | 3.51E-07 | 117.230118 | 143.813812 | 123.890807  | 48.67059813 | 24.75142379  |            | 40.83718126 | Ckap2l   |
| ENSMUSG00000028195 | 2.186286178 | 1.128482258  | 5.72E-08 | 3.52E-07 | 8068.29574 | 7041.98514 | 10071.08307 | 21308.40208 | 13681.56287  |            | 20061.26529 | Cyr61    |
| ENSMUSG00000064141 | 0.296648754 | -1.75317237  | 5.75E-08 | 3.54E-07 | 76.96023   | 94         |             |             |              |            |             |          |

|                    |              |              |          |          |            |            |             |             |             |              |               |
|--------------------|--------------|--------------|----------|----------|------------|------------|-------------|-------------|-------------|--------------|---------------|
| ENSMUSG00000019787 | 0.024124382  | -5.373364205 | 7.58E-08 | 4.59E-07 | 532.457405 | 7295.37138 | 1899.24608  | 119.0876337 | 45.23536071 | 70.44413768  | Trdn          |
| ENSMUSG00000038602 | 0.256160099  | -1.964882322 | 7.62E-08 | 4.61E-07 | 106.491481 | 102.724151 | 102.82937   | 40.386241   | 19.63043956 | 20.41859063  | Slc35f1       |
| ENSMUSG00000078920 | 0.326919305  | -1.612993523 | 7.64E-08 | 4.62E-07 | 431.335243 | 1002.78338 | 678.921624  | 200.8956604 | 241.5397563 | 248.0858762  | Ifi47         |
| ENSMUSG00000030411 | 0.409375629  | -1.288502878 | 7.65E-08 | 4.62E-07 | 196.877507 | 188.816733 | 220.525367  | 102.5189195 | 66.57279501 | 79.63250346  | Nova2         |
| ENSMUSG00000043263 | 0.242230161  | -2.045549582 | 7.66E-08 | 4.62E-07 | 239.829554 | 634.933086 | 516.624666  | 80.772482   | 149.3620401 | 106.1766713  | Ifi209        |
| ENSMUSG00000028076 | 0.121339264  | -1.637830931 | 7.73E-08 | 4.67E-07 | 624.630704 | 429.484784 | 460.873803  | 187.43358   | 96.44520303 | 204.1859063  | Ctd1d1        |
| ENSMUSG00000058427 | 0.010708382  | -6.545115735 | 7.99E-08 | 4.82E-07 | 46.5340926 | 1017.45826 | 183.358395  | 3.106633923 | 5.120984232 | 5.104647658  | Cxcl2         |
| ENSMUSG00000097124 | 0.138607024  | -2.850927725 | 8.20E-08 | 4.94E-07 | 613.892067 | 363.936992 | 148.668969  | 70.41703559 | 23.04442904 | 63.29763095  | A530020G20Rik |
| ENSMUSG00000026433 | 0.478913378  | -1.062163358 | 8.21E-08 | 4.95E-07 | 578.096611 | 581.125198 | 844.935306  | 326.1965619 | 332.8639751 | 299.1323527  | Rab29         |
| ENSMUSG00000028150 | 0.326235344  | -1.616015006 | 8.30E-08 | 5.00E-07 | 187.926143 | 160.445341 | 117.696267  | 62.13267846 | 41.82137123 | 49.00461751  | Rorc          |
| ENSMUSG00000040289 | 0.494827261  | -1.015002094 | 8.33E-08 | 5.02E-07 | 332.002853 | 274.909395 | 312.204834  | 172.9359551 | 149.3620401 | 132.7208391  | Hey1          |
| ENSMUSG00000036833 | 0.488070136  | -1.034839616 | 8.34E-08 | 5.02E-07 | 456.392062 | 608.518305 | 501.757769  | 277.5259638 | 212.5208456 | 275.6509735  | Pnpla7        |
| ENSMUSG00000070385 | 0.012078722  | -6.371388337 | 8.37E-08 | 5.04E-07 | 115.440345 | 1983.06528 | 234.153626  | 7.248812487 | 7.681476348 | 13.27208391  | Ampd1         |
| ENSMUSG00000053164 | 2.756357062  | -1.462762789 | 8.38E-08 | 5.04E-07 | 86.8039804 | 70.4394179 | 47.0785068  | 179.1492229 | 182.6484376 | 206.2277654  | Gpr21         |
| ENSMUSG00000078942 | 0.225103017  | -2.151342701 | 8.53E-08 | 5.13E-07 | 121.70455  | 130.117258 | 63.1843117  | 19.67534818 | 23.89792642 | 27.56509735  | Naip6         |
| ENSMUSG00000046031 | 0.10624195   | -3.234574558 | 8.59E-08 | 5.16E-07 | 34.005683  | 125.225632 | 109.02391   | 9.319901769 | 12.80246058 | 6.125577189  | Fam26f        |
| ENSMUSG00000062082 | 0.057017711  | -4.132446078 | 8.59E-08 | 5.16E-07 | 23.2670463 | 87.0709471 | 42.1228745  | 3.106633923 | 2.560492116 | 3.062788595  | Cd200r4       |
| ENSMUSG00000068697 | 0.015711218  | -5.992061143 | 8.72E-08 | 5.23E-07 | 397.32956  | 6351.28751 | 846.174214  | 36.24406244 | 29.01891065 | 54.10926517  | Mysz1         |
| ENSMUSG00000056973 | 0.380418615  | -1.394340252 | 8.84E-08 | 5.30E-07 | 2088.66485 | 1116.26911 | 1447.044634 | 664.8196595 | 450.6466124 | 655.4367592  | Ces1d         |
| ENSMUSG00000067780 | 2.16655763   | 1.115404613  | 8.88E-08 | 5.32E-07 | 5117.8553  | 3099.33439 | 3513.54329  | 7252.954666 | 9362.86617  | 8802.454421  | Plt15         |
| ENSMUSG00000033060 | 0.45342313   | -1.141070108 | 8.90E-08 | 5.33E-07 | 692.64207  | 771.898621 | 555.030817  | 369.6894368 | 303.8450644 | 242.9812285  | Lmo7          |
| ENSMUSG00000097908 | 2.060987775  | 1.043335947  | 8.95E-08 | 5.36E-07 | 137.812505 | 112.507404 | 125.129751  | 238.1752674 | 289.3356091 | 246.0440171  | A933404O12Rik |
| ENSMUSG00000027460 | 2.002729377  | 1.001967487  | 9.02E-08 | 5.39E-07 | 401.803992 | 371.763594 | 514.14685   | 994.1228554 | 749.3706926 | 832.0575682  | Angpt4        |
| ENSMUSG00000027323 | 0.285743102  | -1.07209425  | 9.06E-08 | 5.41E-07 | 76.0653436 | 101.745826 | 92.9181057  | 24.85307138 | 31.57940276 | 12.4859063   | Rad51         |
| ENSMUSG00000052135 | 3.983369426  | 1.993989284  | 9.19E-08 | 5.49E-07 | 34.9005694 | 45.0029614 | 21.0614372  | 101.4833748 | 130.5850979 | 173.5580204  | Foxo6         |
| ENSMUSG00000028270 | 0.378509511  | -1.401598541 | 9.69E-08 | 5.77E-07 | 1467.61369 | 2937.91072 | 1613.05831  | 723.8457041 | 809.969006  | 744.2576285  | Gbp2          |
| ENSMUSG00000063632 | 0.084633678  | -3.562624329 | 9.83E-08 | 5.84E-07 | 34.9005694 | 55.7645392 | 139.996612  | 9.319901769 | 5.104647658 | 5.04647658   | Sox11         |
| ENSMUSG00000074604 | 0.242518053  | -2.043835947 | 9.83E-08 | 5.84E-07 | 77.8551164 | 60.6561654 | 94.1570135  | 15.53316962 | 23.04442904 | 17.35580204  | Mgst2         |
| ENSMUSG00000060843 | 3.133078766  | 1.64758104   | 9.84E-08 | 5.85E-07 | 169.133529 | 132.073909 | 60.177601   | 420.4311243 | 415.6532201 | 334.8648863  | Ctnna3        |
| ENSMUSG00000054435 | 0.468825897  | -1.092875832 | 9.87E-08 | 5.86E-07 | 688.167638 | 773.855272 | 516.624666  | 298.2368566 | 355.9084041 | 273.6091144  | Gimnap4       |
| ENSMUSG00000102037 | 0.039515174  | -4.674793258 | 1.02E-07 | 6.07E-07 | 23.2670463 | 62.6128159 | 68.4061503  | 3.106633923 | 0.853497302 | 1.020929532  | Bcl2ta1       |
| ENSMUSG00000040099 | 2.251160883  | 1.548515975  | 1.03E-07 | 6.08E-07 | 56.3778429 | 63.5911412 | 91.6791974  | 196.7534818 | 165.5784922 | 253.1905238  | Gna1          |
| ENSMUSG00000095332 | 3.753776122  | 1.908342609  | 1.04E-07 | 6.15E-07 | 154.815346 | 139.900511 | 52.0341391  | 396.6135975 | 421.6277018 | 490.0461751  | Gm9821        |
| ENSMUSG00000031070 | 2.002888587  | 1.002082172  | 1.05E-07 | 6.18E-07 | 422.386379 | 280.779346 | 317.160467  | 651.3575792 | 722.9122741 | 671.7716317  | Mrgpr7        |
| ENSMUSG00000032878 | 2.897805517  | 1.534960773  | 1.05E-07 | 6.21E-07 | 71.5909116 | 39.1330099 | 55.7508633  | 144.9762497 | 169.845977  | 168.4533727  | Ccdc85a       |
| ENSMUSG00000020638 | 0.271702172  | -1.879901994 | 1.05E-07 | 6.23E-07 | 306.051147 | 814.944932 | 692.549613  | 129.4430801 | 168.9924796 | 193.976611   | Cmpk2         |
| ENSMUSG00000105302 | 0.074379805  | -3.748945224 | 1.08E-07 | 6.38E-07 | 30.4261374 | 64.5694664 | 175.924666  | 5.177723205 | 7.681476348 | 7.146506721  | Gm19817       |
| ENSMUSG00000044405 | 0.38922342   | -1.361329573 | 1.08E-07 | 6.38E-07 | 399.119332 | 334.587235 | 559.986449  | 204.0022943 | 156.1900191 | 142.9301344  | Adig          |
| ENSMUSG00000020826 | 0.195511016  | -2.354678195 | 1.10E-07 | 6.48E-07 | 74.2755708 | 50.8729129 | 69.3788521  | 17.6042589  | 8.53497372  | 12.25115438  | Nos2          |
| ENSMUSG00000034906 | 0.258325157  | -1.95273995  | 1.11E-07 | 6.52E-07 | 160.184665 | 135.008884 | 100.351554  | 49.70614277 | 25.60492116 | 27.560492116 | Ncap          |
| ENSMUSG00000042744 | 2.135256851  | 1.094409622  | 1.11E-07 | 6.53E-07 | 1083.70742 | 710.264313 | 656.621278  | 1719.004104 | 1680.536325 | 1838.694086  | Hctcd4        |
| ENSMUSG00000041134 | 0.280562218  | -1.833607355 | 1.12E-07 | 6.61E-07 | 482.343767 | 276.866045 | 208.136556  | 110.8032766 | 83.64274245 | 77.5906444   | Cyrr1         |
| ENSMUSG00000041605 | 0.006956095  | -7.167506709 | 1.12E-07 | 6.61E-07 | 30.4261374 | 27.393107  | 18.5836211  | 0           | 0           | 0            | S730559C18Rik |
| ENSMUSG00000026944 | 2.326642287  | 1.218249419  | 1.13E-07 | 6.64E-07 | 871.619349 | 724.939009 | 467.068343  | 1662.049149 | 1433.022088 | 1713.119754  | Abca2         |
| ENSMUSG00000023277 | 0.481950212  | -1.053043978 | 1.13E-07 | 6.65E-07 | 623.735818 | 974.411948 | 849.890938  | 411.112225  | 359.327421  | 409.3927421  | Twf2          |
| ENSMUSG00000032105 | 9.652395888  | 3.270887088  | 1.14E-07 | 6.69E-07 | 3.57954558 | 3.91330099 | 3.71672422  | 39.35069636 | 34.13989488 | 34.71160407  | Pdzd3         |
| ENSMUSG00000079491 | 0.310903394  | -1.685461727 | 1.14E-07 | 6.70E-07 | 146.761369 | 260.234516 | 147.430061  | 56.95495526 | 62.30530815 | 53.08833564  | H2-T10        |
| ENSMUSG00000041609 | 2.021366814  | 1.015331149  | 1.15E-07 | 6.77E-07 | 104.701708 | 107.615777 | 117.696267  | 214.3577407 | 243.246751  | 207.2486949  | Bicd11        |
| ENSMUSG00000031780 | 0.015382076  | -6.022605978 | 1.16E-07 | 6.81E-07 | 36.6903422 | 45.0029614 | 42.1228745  | 0           | 1.706994744 | 0            | Ccl17         |
| ENSMUSG00000050821 | 2.014630449  | 1.010515242  | 1.20E-07 | 7.04E-07 | 283.678987 | 435.354736 | 341.938628  | 681.3883738 | 687.9188818 | 767.7390077  | Fam131a       |
| ENSMUSG00000085218 | 4.35435405   | 2.122458717  | 1.20E-07 | 7.04E-07 | 18.7926143 | 16.6315292 | 11.1501727  | 55.91941062 | 70.84028187 | 78.61157393  | B8218582      |
| ENSMUSG00000067158 | 2.246969883  | 1.167980788  | 1.21E-07 | 7.06E-07 | 292.627851 | 199.578351 | 193.269659  | 557.1230169 | 439.5511466 | 548.2391584  | Col4a4        |
| ENSMUSG00000027398 | 1.830636824  | -2.449546617 | 1.21E-07 | 7.07E-07 | 224.616485 | 782.660199 | 376.66962   | 126.3364462 | 68.2797897  | 59.21391283  | Il1b          |
| ENSMUSG00000026548 | 0.349371258  | -1.517167169 | 1.23E-07 | 7.21E-07 | 304.261374 | 577.211897 | 463.351619  | 119.0876337 | 171.5529718 | 178.662668   | Slamf9        |
| ENSMUSG00000056258 | 6.062340079  | 2.599874785  | 1.24E-07 | 7.25E-07 | 25.0668191 | 11.739903  | 6.19454036  | 97.34119626 | 72.54727662 | 96.98830549  | Kcnq3         |
| ENSMUSG00000068606 | 0.110761411  | -3.17447276  | 1.25E-07 | 7.31E-07 | 83.2244348 | 409.918279 | 218.047821  | 13.46208033 | 20.48393693 | 44.92089939  | Gm4841        |
| ENSMUSG00000026893 | 0.275253177  | -1.861168881 | 1.28E-07 | 7.47E-07 | 74.2755708 | 65.5477917 | 65.6621278  | 19.67534818 | 20.48393693 | 16.3348725   | Gca           |
| ENSMUSG00000019796 | 0.2792438891 | -1.840402366 | 1.28E-07 | 7.49E-07 | 96.6477307 | 90.0059229 | 100.02391   | 24.85307138 | 37.55388437 | 19.3976611   | Lrp11         |
| ENSMUSG00000050761 | 3.689334525  | 1.883360609  | 1.29E-07 | 7.51E-07 | 85.0142076 | 109.572428 | 200.703108  | 462.8884545 | 347.3734304 | 642.1646753  | Gp1bb         |
| ENSMUSG00000041695 | 0.297783666  | -1.749594439 | 1.29E-07 | 7.52E-07 | 139.602278 | 256.321215 | 144.952244  | 60.06158918 | 46.08885809 | 55.1301971   | Kcnj2         |
| ENSMUSG00000000317 | 0.419833852  | -1.252109597 | 1.36E-07 | 7.95E-07 | 444.758539 | 518.512382 | 765.645189  | 222.6420978 | 234.7117773 | 267.4835373  | Bcl6b         |
| ENSMUSG00000030399 | 0.013300146  | -6.232414114 | 1.38E-07 | 8.03E-07 | 421.12515  | 71947.0171 | 7953.78983  | 520.8789544 | 290.9603537 | 387.953222   | Ckm           |
| ENSMUSG00000021686 | 2.799741928  | 1.485293878  | 1.39E-07 | 8.10E-07 | 98.4375035 | 77.2876946 | 73.0955763  | 275.4548745 | 258.6097037 | 164.3696546  | B3gnt5        |
| ENSMUSG00000039457 | 0.366734536  | -1.447191961 | 1.40E-07 | 8.18E-07 | 1356.64778 | 846.25134  | 790.42335   | 482.5638027 | 314.0870329 | 302.1951413  | Ppl           |
| ENSMUSG00000046223 | 0.404122166  | -1.307136611 | 1.42E-07 | 8.23E-07 | 326.633534 | 528.295634 | 542.641736  | 192.6113032 | 210.8138509 | 160.2859364  | Plaur         |
| ENSMUSG00000037358 | 0.22994714   | -2.1208293   | 1.42E-07 | 8.25E-07 | 261.306827 | 165.336967 | 95.3959216  | 44.52841956 | 40.11437687 | 35.7325336   | A930578C19Rik |
| ENSMUSG00000026315 | 0.443428067  | -1.173228006 | 1.47E-07 | 8.53E-07 | 434.019902 | 396.221726 | 359.283441  | 225.7487317 | 140.8270664 | 162.3277955  | Serpinb8      |
| ENSMUSG00000029778 | 0.274544387  | -1.864888677 | 1.48E-07 | 8.60E-07 | 287.258533 | 173.163569 | 183.358395  | 78.70139272 | 36.70038699 |              |               |

|                     |              |              |          |          |             |            |            |             |             |             |               |
|---------------------|--------------|--------------|----------|----------|-------------|------------|------------|-------------|-------------|-------------|---------------|
| ENSMUSG00000032062  | 2.063757874  | 1.045273719  | 2.23E-07 | 1.27E-06 | 144.07671   | 109.572428 | 110.262818 | 241.2819014 | 268.8516722 | 242.9812285 | Z310030G06Rik |
| ENSMUSG000000099350 | 0.006115146  | -7.35339723  | 2.25E-07 | 1.28E-06 | 38.480115   | 37.1763594 | 11.1501727 | 0           | 0           | 0           | Mpo           |
| ENSMUSG00000059900  | 5.249030546  | 2.392050993  | 2.28E-07 | 1.29E-06 | 14.3181823  | 7.82660199 | 17.344713  | 61.09713382 | 54.62383181 | 89.84179877 | Tmem40        |
| ENSMUSG00000016283  | 0.037496182  | -4.737112473 | 2.32E-07 | 1.31E-06 | 21.4777235  | 123.268981 | 38.4061503 | 2.071089282 | 0.853497372 | 4.083718126 | H2-M2         |
| ENSMUSG00000049690  | 0.161617582  | -2.629343936 | 2.33E-07 | 1.32E-06 | 63.56369341 | 47.9379372 | 63.1843117 | 6.213267846 | 15.3629527  | 6.125577189 | Nckap5        |
| ENSMUSG00000025352  | 0.404665616  | -1.305229911 | 2.35E-07 | 1.33E-06 | 195.980121  | 278.822696 | 317.160467 | 108.7321873 | 117.7826373 | 92.90458737 | Gdf11         |
| ENSMUSG00000076612  | 0.023667336  | -5.400958885 | 2.35E-07 | 1.33E-06 | 187.031257  | 1146.59719 | 153.624601 | 16.56871426 | 14.50945532 | 4.083718126 | Ighg2c        |
| ENSMUSG00000105198  | 24.90732535  | 4.638498202  | 2.35E-07 | 1.33E-06 | 1.78977279  | 0.97832525 | 1.23890807 | 28.99524995 | 27.3119159  | 44.92089939 | Gm42502       |
| ENSMUSG00000050052  | 0.421912302  | -1.24498494  | 2.36E-07 | 1.33E-06 | 161.974438  | 147.727113 | 201.942016 | 79.73693736 | 67.42629239 | 68.40227861 | Tdrp          |
| ENSMUSG00000052125  | 0.199956225  | -2.322243901 | 2.36E-07 | 1.33E-06 | 59.9573885  | 85.1142966 | 65.6621278 | 7.248812487 | 15.3629527  | 19.3976611  | F730043M19Rik |
| ENSMUSG00000060969  | 0.1277662565 | -2.969592554 | 2.36E-07 | 1.34E-06 | 53.6931837  | 39.1330099 | 53.2730471 | 6.213267846 | 2.560492116 | 10.20929532 | Irx1          |
| ENSMUSG00000046818  | 0.228758536  | -2.128102518 | 2.42E-07 | 1.37E-06 | 201.349439  | 571.341945 | 219.286729 | 77.66584808 | 70.84028187 | 78.61157393 | Ddit4l        |
| ENSMUSG00000042807  | 0.303445099  | -1.720492573 | 2.47E-07 | 1.39E-06 | 258.622168  | 174.141894 | 146.191153 | 67.31040167 | 40.96787385 | 68.40227861 | Hecw2         |
| ENSMUSG00000029366  | 0.483787579  | -1.047554365 | 2.47E-07 | 1.40E-06 | 242.514213  | 336.543886 | 325.832823 | 151.1895176 | 145.0945532 | 140.8882754 | Dck           |
| ENSMUSG00000029802  | 0.423583781  | -1.239280747 | 2.49E-07 | 1.41E-06 | 1609.00574  | 1235.62479 | 846.174214 | 584.0471775 | 480.5190204 | 500.2554704 | Abcg2         |
| ENSMUSG00000030382  | 29.10189404  | 4.863041146  | 2.50E-07 | 1.41E-06 | 3.57954558  | 2.93497575 | 4.95563229 | 92.16347305 | 10.24196846 | 228.6882151 | Sic27a5       |
| ENSMUSG00000018500  | 0.300515821  | -1.734487152 | 2.52E-07 | 1.42E-06 | 76.96023    | 90.0059229 | 113.979543 | 22.7819821  | 32.43290013 | 28.58602688 | Adora2b       |
| ENSMUSG00000099411  | 5.646247567  | 2.497292387  | 2.53E-07 | 1.43E-06 | 28.6363647  | 122.290656 | 40.8839664 | 269.2416067 | 425.0416912 | 389.995081  | Z310015D24Rik |
| ENSMUSG00000023078  | 0.168179278  | -2.571928138 | 2.55E-07 | 1.44E-06 | 50.1136381  | 55.7645392 | 52.0341391 | 9.319901769 | 12.80246688 | 4.083718126 | Cxcl13        |
| ENSMUSG00000109160  | 170.2079268  | 7.411154417  | 2.63E-07 | 1.48E-06 | 0           | 0          | 0          | 23.81752674 | 13.65595795 | 59.21391283 | 4930598N05Rik |
| ENSMUSG00000023176  | 34.44474037  | 5.106211798  | 2.68E-07 | 1.51E-06 | 1.78977279  | 5.86995149 | 4.95563229 | 117.0165444 | 8.53497372  | 305.2579299 | Cpn2          |
| ENSMUSG00000068452  | 0.224736431  | -2.153694082 | 2.68E-07 | 1.51E-06 | 130.653414  | 108.594103 | 91.6791974 | 40.386241   | 16.21645007 | 18.37673157 | Duox2         |
| ENSMUSG00000068804  | 0.494589825  | -1.015695536 | 2.68E-07 | 1.51E-06 | 595.099453  | 502.859178 | 395.211675 | 246.4596246 | 231.2977878 | 262.3788896 | Vsig10        |
| ENSMUSG00000080021  | 8.006832748  | 3.001231671  | 2.70E-07 | 1.52E-06 | 5.36931837  | 3.91330099 | 8.67235651 | 33.13742851 | 44.38186334 | 63.29763095 | Gm5915        |
| ENSMUSG00000051627  | 8.66924625   | 3.115906563  | 2.72E-07 | 1.53E-06 | 4.47443198  | 18.5881797 | 3.71672422 | 62.13267846 | 99.00569515 | 73.50692627 | Hist1h1e      |
| ENSMUSG00000043943  | 0.404976565  | -1.30408967  | 2.73E-07 | 1.53E-06 | 998.693217  | 635.911412 | 555.030817 | 293.0591334 | 256.0492116 | 338.9486045 | Nalad2        |
| ENSMUSG00000030187  | 0.189879601  | -2.39684317  | 2.73E-07 | 1.54E-06 | 60.8522749  | 180.990171 | 106.546094 | 19.67534818 | 22.46044969 | 22.46044969 | Klra2         |
| ENSMUSG00000024791  | 0.133900165  | -2.900770362 | 2.74E-07 | 1.54E-06 | 31.3210238  | 71.4177432 | 54.5119552 | 7.248812487 | 8.53497372  | 5.104647658 | Cdca5         |
| ENSMUSG00000102418  | 0.17419208   | -2.521249065 | 2.74E-07 | 1.54E-06 | 36.6903422  | 74.3527189 | 65.6621278 | 9.319901769 | 11.09546584 | 10.20929532 | Sh2d1b1       |
| ENSMUSG00000035390  | 2.135881177  | 1.094831389  | 2.78E-07 | 1.56E-06 | 190.610802  | 149.683763 | 123.890807 | 302.3790352 | 355.0549067 | 337.9276749 | Brsk1         |
| ENSMUSG00000023034  | 2.367643994  | 1.24345217   | 2.79E-07 | 1.56E-06 | 2377.71315  | 2082.85445 | 2725.59776 | 6411.056873 | 3662.357223 | 6940.278955 | Nrad4         |
| ENSMUSG00000079620  | 67.64351987  | 6.079879828  | 2.81E-07 | 1.58E-06 | 0.8948864   | 0.97832525 | 0          | 24.85307138 | 68.27979876 | 42.87904032 | Muc4          |
| ENSMUSG00000028789  | 0.447825534  | -1.158991305 | 2.85E-07 | 1.60E-06 | 288.153419  | 303.280827 | 419.989837 | 133.5852587 | 145.9480506 | 172.5370908 | Azin2         |
| ENSMUSG00000041957  | 0.254913029  | -1.97192298  | 2.86E-07 | 1.60E-06 | 102.017049  | 81.2009956 | 118.935175 | 20.71089282 | 18.77694218 | 37.77439267 | Pkp2          |
| ENSMUSG00000019906  | 0.161539438  | -2.630041673 | 2.88E-07 | 1.61E-06 | 84.1193212  | 60.6561654 | 63.1843117 | 17.6042589  | 4.26748686  | 13.27208391 | Lin7a         |
| ENSMUSG00000042489  | 0.215088763  | -2.216995938 | 2.92E-07 | 1.63E-06 | 86.8039804  | 110.550753 | 50.795231  | 17.6042589  | 20.48396392 | 15.31394297 | Clsnp         |
| ENSMUSG00000021556  | 0.381416752  | -1.390559885 | 2.96E-07 | 1.66E-06 | 977.215944  | 752.332178 | 416.218516 | 309.6278477 | 295.3100907 | 237.8765808 | Golm1         |
| ENSMUSG00000001588  | 0.298764531  | -1.742919211 | 3.00E-07 | 1.68E-06 | 98.4375035  | 180.990171 | 120.174083 | 36.24406244 | 46.08885809 | 36.75346313 | Acap1         |
| ENSMUSG00000091089  | 0.03750232   | -4.736876332 | 3.01E-07 | 1.68E-06 | 48.3238654  | 116.420705 | 13.6279888 | 2.071089282 | 2.560492116 | 2.041859063 | NA            |
| ENSMUSG00000032523  | 0.064557772  | -3.953265405 | 3.02E-07 | 1.69E-06 | 42.0596606  | 435.354736 | 92.181054  | 18.05980354 | 11.09546584 | 7.146506721 | 1Hhatl        |
| ENSMUSG00000039328  | 0.435074554  | -1.200665455 | 3.05E-07 | 1.70E-06 | 202.244325  | 201.535001 | 246.542706 | 74.55921415 | 96.44520303 | 111.2813189 | Rnf122        |
| ENSMUSG00000078650  | 57.43795609  | 5.843932507  | 3.05E-07 | 1.70E-06 | 1.78977279  | 1.9566505  | 1.23890807 | 68.34594631 | 5.974481604 | 215.416131  | Gpcpc         |
| ENSMUSG00000041062  | 5.909017275  | 2.562918217  | 3.07E-07 | 1.72E-06 | 8.05397756  | 5.86995149 | 8.67235651 | 38.31515172 | 50.35634495 | 43.89996986 | Mslnl         |
| ENSMUSG00000084866  | 3.918467144  | 1.9702894    | 3.11E-07 | 1.73E-06 | 17.0028415  | 23.479806  | 13.6279888 | 63.1682231  | 82.78924508 | 67.38134908 | A930006K02Rik |
| ENSMUSG00000006542  | 0.033861683  | -4.884202519 | 3.13E-07 | 1.74E-06 | 82.3295484  | 928.430661 | 242.825982 | 15.53316962 | 13.65595795 | 13.27208391 | Prkg3         |
| ENSMUSG00000028116  | 6.590628992  | 2.720416159  | 3.14E-07 | 1.75E-06 | 8.94886395  | 57.7211897 | 42.1228745 | 307.5567584 | 213.374343  | 192.9556815 | Myoz2         |
| ENSMUSG00000024803  | 0.381911294  | -1.388690512 | 3.17E-07 | 1.77E-06 | 323.948875  | 529.27396  | 661.576911 | 200.8956604 | 192.0369087 | 184.7882452 | Ankrd1        |
| ENSMUSG00000066363  | 0.076216816  | -3.713746851 | 3.28E-07 | 1.82E-06 | 23.2670463  | 70.4394179 | 43.3617825 | 3.106633923 | 2.041859063 | 2.041859063 | Serpin3f      |
| ENSMUSG00000042474  | 12.44148526  | 3.637086819  | 3.28E-07 | 1.83E-06 | 3.57954558  | 2.93497575 | 3.71672422 | 35.20851779 | 65.71929764 | 25.52323829 | Fcmr          |
| ENSMUSG00000031562  | 0.139613966  | -2.84048483  | 3.31E-07 | 1.84E-06 | 41.1647742  | 37.1763594 | 38.4061503 | 3.106633923 | 5.974481604 | 7.146506721 | Dctd          |
| ENSMUSG00000103357  | 16.45202875  | 0.4040193593 | 3.34E-07 | 1.86E-06 | 3.57954558  | 2.93497575 | 0          | 25.88861603 | 51.20984232 | 36.75346313 | Gm7804        |
| ENSMUSG00000035189  | 5.33152661   | 2.414548688  | 3.37E-07 | 1.87E-06 | 12.5284095  | 14.6748787 | 14.868969  | 50.74168741 | 110.9546584 | 61.25577189 | Ano4          |
| ENSMUSG000000017300 | 0.013707962  | -6.188842062 | 3.40E-07 | 1.89E-06 | 548.55536   | 11898.3917 | 1443.3279  | 96.30565161 | 29.87240802 | 64.31856049 | Tnnc2         |
| ENSMUSG00000018604  | 0.42427813   | -1.236917781 | 3.42E-07 | 1.90E-06 | 272.940351  | 276.866045 | 423.706561 | 151.1895176 | 125.4641137 | 135.7836277 | Tbx3          |
| ENSMUSG00000029733  | 2.032917484  | 1.023551657  | 3.44E-07 | 1.90E-06 | 604.048317  | 643.738014 | 932.897779 | 1284.075355 | 158.513063  | 1561.001254 | Auts2         |
| ENSMUSG00000021280  | 0.411265246  | -1.281858932 | 3.44E-07 | 1.90E-06 | 171.818188  | 190.773423 | 154.863509 | 83.87911592 | 55.47732918 | 74.5278558  | Exoc3l4       |
| ENSMUSG00000005057  | 0.278798379  | -1.842705922 | 3.47E-07 | 1.92E-06 | 297.99717   | 185.881797 | 170.969314 | 82.84357128 | 38.40738174 | 62.27670142 | Sh2b2         |
| ENSMUSG00000017002  | 0.196023457  | -2.350901792 | 3.55E-07 | 1.97E-06 | 149.446028  | 560.580367 | 221.764545 | 56.95495526 | 67.42629239 | 58.1929833  | Slpi          |
| ENSMUSG000000046101 | 6.612810387  | 2.725263535  | 3.60E-07 | 1.99E-06 | 5.36931837  | 5.86995149 | 7.43344844 | 37.2796708  | 47.79582823 | 36.75346313 | Mcmcd2        |
| ENSMUSG00000054988  | 2.072874344  | 1.051632664  | 3.61E-07 | 1.99E-06 | 144.07671   | 129.138933 | 112.740635 | 27.9570531  | 227.8837983 | 296.0695641 | Agtr1b        |
| ENSMUSG00000006519  | 0.416219167  | -1.26458469  | 3.69E-07 | 2.04E-06 | 1217.0455   | 2339.17567 | 2341.53626 | 806.6892754 | 814.2364929 | 833.0784977 | Cyba          |
| ENSMUSG00000071317  | 3.492332317  | 1.804190723  | 3.70E-07 | 2.04E-06 | 83.2244348  | 238.711361 | 120.174083 | 474.2794456 | 572.6967366 | 497.1926819 | Bves          |
| ENSMUSG00000038354  | 2.314785848  | 2.120878729  | 3.70E-07 | 2.05E-06 | 185.241484  | 119.35568  | 146.68969  | 286.8458656 | 360.175891  | 403.267165  | Ankrd35       |
| ENSMUSG00000032186  | 0.423438751  | -1.239774793 | 3.71E-07 | 2.05E-06 | 1449.71596  | 868.752821 | 843.696397 | 498.0969723 | 455.7675966 | 385.9113629 | Tmod2         |
| ENSMUSG00000096967  | 2.869895844  | 1.520998379  | 3.71E-07 | 2.05E-06 | 47.428979   | 33.2630585 | 39.645083  | 128.4075355 | 94.73820829 | 123.5324733 | Gm26621       |
| ENSMUSG000000098912 | 2.321487791  | 2.125046964  | 3.75E-07 | 2.07E-06 | 157.500006  | 115.442379 | 92.9181054 | 260.9572495 | 293.603096  | 299.132527  | I500004A13Rik |
| ENSMUSG00000040838  | 19.20757499  | 4.263603481  | 3.80E-07 | 2.10E-06 | 4.47443198  | 0.97832525 | 0          | 42.45733028 | 27.3119159  | 43.89996986 | Gm11639       |
| ENSMUSG00000031286  | 3.246971627  | 1.699094778  | 3.92E-07 | 2.16E-06 | 25.9517055  | 53.8078887 | 40.8839664 | 118.0520891 | 148.5082477 | 123.5324733 | Gltx2d2       |

|                    |              |               |          |          |              |            |             |             |              |             |               |
|--------------------|--------------|---------------|----------|----------|--------------|------------|-------------|-------------|--------------|-------------|---------------|
| ENSMUSG00000030359 | 249.1143908  | 7.960664555   | 5.02E-07 | 2.72E-06 | 3.57954558   | 5.86995149 | 7.43344844  | 1221.942676 | 9.388471092  | 2959.674712 | Pzp           |
| ENSMUSG00000040329 | 0.28782528   | -1.796734782  | 5.12E-07 | 2.78E-06 | 144.07671    | 164.358642 | 99.1126458  | 49.70614277 | 25.60492116  | 42.87904032 | lI7           |
| ENSMUSG00000055368 | 0.342654235  | -1.545174577  | 5.13E-07 | 2.79E-06 | 99.3323899   | 95.8758744 | 75.5733924  | 27.95970531 | 33.28639751  | 31.64881548 | Slc6a2        |
| ENSMUSG00000027985 | 5.571097077  | 2.477961455   | 5.24E-07 | 2.84E-06 | 8.05397756   | 11.739903  | 11.1501727  | 43.49287492 | 79.37525559  | 47.98368798 | Lef1          |
| ENSMUSG00000044162 | 0.092160925  | -3.439700993  | 5.24E-07 | 2.84E-06 | 32.2159102   | 82.1793209 | 66.9010359  | 3.106633923 | 2.560492116  | 11.23022485 | Tnlp3         |
| ENSMUSG00000032783 | 0.172371978  | -2.53640284   | 5.29E-07 | 2.86E-06 | 38.480115    | 42.0679857 | 42.1268745  | 8.284357128 | 7.681476348  | 5.104647658 | Troap         |
| ENSMUSG00000039774 | 0.245387767  | -2.026864767  | 5.30E-07 | 2.87E-06 | 53.6931837   | 63.5911412 | 50.795231   | 11.39099105 | 14.50945532  | 15.31394297 | Galnt12       |
| ENSMUSG00000032066 | 0.159176034  | -2.651304956  | 5.31E-07 | 2.87E-06 | 34.005683    | 59.6778402 | 59.4675875  | 11.39099105 | 5.974481604  | 7.146506721 | Bco2          |
| ENSMUSG00000046908 | 0.181590929  | -2.461171604  | 5.39E-07 | 2.91E-06 | 49.2187517   | 58.6995149 | 34.689426   | 8.284357128 | 8.53497372   | 9.188365784 | Ltb4r1        |
| ENSMUSG00000041528 | 2.553626993  | 1.352547807   | 5.48E-07 | 2.96E-06 | 47.0888662   | 874.622772 | 389.017135  | 1571.956765 | 1696.752775  | 1800.919694 | Rnf123        |
| ENSMUSG00000033006 | 0.318278921  | -1.65163648   | 5.52E-07 | 2.98E-06 | 170.028415   | 137.94386  | 94.1570135  | 46.59950885 | 46.94235546  | 34.71160047 | Sox10         |
| ENSMUSG00000057457 | 2.510705948  | 1.328093071   | 5.57E-07 | 3.01E-06 | 89.4886395   | 79.2443451 | 52.0341391  | 195.7179372 | 197.1578929  | 165.3905841 | Phex          |
| ENSMUSG00000022385 | 0.266918798  | -1.905527183  | 5.84E-07 | 3.15E-06 | 58.1676157   | 81.2009956 | 58.2286794  | 16.56871426 | 18.77694218  | 17.35580204 | Gtse1         |
| ENSMUSG00000029875 | 0.043336475  | -4.52827438   | 5.86E-07 | 3.16E-06 | 28.6363647   | 34.2413837 | 27.2559776  | 2.071089282 | 0            | 2.041859063 | Ccdc184       |
| ENSMUSG00000050818 | 113.1169212  | 6.821670948   | 5.86E-07 | 3.16E-06 | 0            | 0          | 0           | 24.85307138 | 17.92344461  | 21.43952016 | Olfr330       |
| ENSMUSG00000078153 | 0.25648656   | -1.963044868  | 5.92E-07 | 3.19E-06 | 144.07671    | 281.757672 | 416.273112  | 63.1682231  | 88.76372688  | 63.29763095 | Psme2b        |
| ENSMUSG00000090877 | 2.323534679  | 1.216321176   | 5.98E-07 | 3.22E-06 | 729.332412   | 573.298596 | 853.607662  | 1792.527774 | 1164.170415  | 2052.068358 | Hspa1b        |
| ENSMUSG00000045733 | 0.387444776  | -1.367937405  | 6.10E-07 | 3.28E-06 | 353.480126   | 236.75471  | 216.808913  | 121.158723  | 84.49623982  | 108.2185303 | Spn           |
| ENSMUSG00000063388 | 0.069142868  | -3.854275734  | 6.10E-07 | 3.28E-06 | 78.7500028   | 337.522211 | 38.4061503  | 8.284357128 | 5.974481604  | 17.35580204 | BC023105      |
| ENSMUSG00000000290 | 0.373942901  | -1.419110098  | 6.16E-07 | 3.31E-06 | 980.795489   | 1707.17756 | 863.518927  | 446.3197403 | 350.7874199  | 531.9042859 | Itgb2         |
| ENSMUSG00000024205 | 6.464982756  | 2.692646522   | 6.17E-07 | 3.31E-06 | 6.26420477   | 4.89162624 | 9.91126458  | 47.63505349 | 52.06333969  | 33.69067454 | Rpl36-ps2     |
| ENSMUSG00000035504 | 8.679379409  | 3.117591891   | 6.25E-07 | 3.36E-06 | 38.480115    | 29.3497575 | 23.5392534  | 190.5402139 | 68.27978976  | 537.0089336 | Reep6         |
| ENSMUSG00000051401 | 20.18545294  | 4.335244055   | 6.25E-07 | 3.36E-06 | 3.57954558   | 0.97832525 | 0           | 25.88861603 | 29.26087911  | 34.71160047 | Kctd16        |
| ENSMUSG00000040522 | 0.206982596  | -2.272418629  | 6.26E-07 | 3.36E-06 | 156.605119   | 114.464054 | 61.9454036  | 32.10188387 | 17.92344461  | 19.3976611  | Tlrl8         |
| ENSMUSG00000034686 | 0.32066975   | -1.640839832  | 6.30E-07 | 3.38E-06 | 97.5426171   | 126.203957 | 177.163854  | 48.67059813 | 42.6748686   | 36.75346313 | Prr7          |
| ENSMUSG00000097131 | 0.3066613111 | 1.616646165   | 6.41E-07 | 3.43E-06 | 61.7471613   | 48.9162624 | 30.9727018  | 118.0520891 | 163.8714954  | 156.2022183 | D230017M19Rik |
| ENSMUSG00000030302 | 0.430380198  | -1.216316395  | 6.47E-07 | 3.47E-06 | 2432.30122   | 3048.46147 | 4828.027416 | 1467.366756 | 1731.5702777 | 1596.733787 | Klf4          |
| ENSMUSG00000054342 | 0.387324258  | -1.368386237  | 6.50E-07 | 3.48E-06 | 288.153419   | 564.493668 | 494.324321  | 169.8293211 | 192.8904061  | 158.2440774 | Kcnn4         |
| ENSMUSG00000028132 | 5.107464398  | 2.352607243   | 6.57E-07 | 3.52E-06 | 46.5340926   | 156.53204  | 40.8839696  | 426.6443921 | 325.1824987  | 497.1926819 | Tmem56        |
| ENSMUSG00000067276 | 0.151700648  | -2.720700847  | 6.62E-07 | 3.54E-06 | 850.142076   | 177.07687  | 242.825982  | 55.91941062 | 89.61722406  | 46.96275845 | Capn6         |
| ENSMUSG00000045362 | 0.349652673  | -1.516005561  | 6.82E-07 | 3.64E-06 | 108.281254   | 167.293618 | 125.129715  | 40.386241   | 56.33082655  | 42.87904032 | Tnfrsf26      |
| ENSMUSG00000035042 | 0.268062732  | -1.8899357433 | 6.97E-07 | 3.72E-06 | 101.122163   | 251.429589 | 161.058499  | 51.77723205 | 40.11437662  | 45.94182892 | Ccl5          |
| ENSMUSG00000024401 | 0.08751206   | -3.514374341  | 7.04E-07 | 3.76E-06 | 34.9005694   | 123.268981 | 44.6006906  | 9.319901769 | 2.560492116  | 6.125577189 | Tnf           |
| ENSMUSG00000020077 | 2.032029352  | 1.022921242   | 7.25E-07 | 3.86E-06 | 123.62788    | 1917.51749 | 1340.49805  | 3173.944325 | 2524.645226  | 3438.490662 | Srgn          |
| ENSMUSG00000021256 | 0.242826474  | -2.042002375  | 7.26E-07 | 3.87E-06 | 215.667621   | 105.659127 | 116.457359  | 39.35069636 | 44.38186334  | 22.46044969 | Vash1         |
| ENSMUSG00000026153 | 2.035471175  | 1.025362791   | 7.29E-07 | 3.88E-06 | 953.948897   | 709.285805 | 553.791908  | 1421.802792 | 1603.721562  | 1492.598975 | Fam135a       |
| ENSMUSG00000071177 | 248.6349815  | 7.957885479   | 7.29E-07 | 3.88E-06 | 0.8948864    | 7.82660199 | 2.47781615  | 751.8054094 | 17.06994744  | 2018.377684 | Serpin1d      |
| ENSMUSG00000072845 | 0.029162082  | -5.099762473  | 7.32E-07 | 3.90E-06 | 36.6903422   | 41.0896604 | 19.8225292  | 1.035544641 | 1.706994744  | 0           | Tmprss11a     |
| ENSMUSG00000021373 | 2.349871922  | 1.232582126   | 7.38E-07 | 3.92E-06 | 404.502869   | 1379.4386  | 740.938693  | 2434.565451 | 2224.214151  | 2132.721791 | Cap2          |
| ENSMUSG00000021187 | 0.173469061  | -2.527249717  | 7.42E-07 | 3.94E-06 | 165.553983   | 98.8108501 | 59.46578693 | 28.16543569 | 28.16543569  | 15.31394297 | Tc2n          |
| ENSMUSG00000059027 | 0.296259998  | -1.755064255  | 7.46E-07 | 3.97E-06 | 102.017049   | 71.4177432 | 74.3344844  | 30.03079459 | 21.3374433   | 22.46044969 | 9630013D21Rik |
| ENSMUSG00000037313 | 0.42714109   | -1.227215406  | 7.54E-07 | 4.00E-06 | 223.721599   | 230.884759 | 354.3277709 | 118.0520891 | 115.2221452  | 111.2813139 | Tacc3         |
| ENSMUSG00000053399 | 0.205191925  | -2.284954134  | 7.63E-07 | 4.05E-06 | 53.6931837   | 62.6128159 | 52.0341391  | 6.213267846 | 11.94896321  | 16.3348725  | Adamts18      |
| ENSMUSG00000070111 | 125.2453223  | 6.968612912   | 7.67E-07 | 4.07E-06 | 0            | 0          | 0           | 33.13742851 | 25.60492116  | 12.25115438 | Gm10286       |
| ENSMUSG00000020799 | 0.473513009  | -1.078524033  | 7.67E-07 | 4.07E-06 | 545.880701   | 525.360659 | 361.761157  | 259.9217049 | 216.7883325  | 203.1649768 | Jag2          |
| ENSMUSG00000050271 | 0.473987867  | -1.077077965  | 7.71E-07 | 4.09E-06 | 263.0966     | 250.451264 | 205.65874   | 104.5900087 | 133.9990874  | 102.0929532 | Prag1         |
| ENSMUSG00000024968 | 2.463511605  | 1.300716268   | 7.74E-07 | 4.10E-06 | 74.2755708   | 55.7645392 | 65.6621278  | 148.0828837 | 139.973569   | 194.9975405 | Rcor2         |
| ENSMUSG00000028351 | 0.138573552  | -2.85127616   | 7.83E-07 | 4.15E-06 | 40.2698878   | 28.3714322 | 42.1228745  | 4.142178564 | 5.974481604  | 5.104647658 | Bripn1        |
| ENSMUSG00000016529 | 0.006520476  | -7.260806981  | 7.88E-07 | 4.17E-06 | 8.94886395   | 27.393107  | 45.8395987  | 0           | 0            | 0           | lI10          |
| ENSMUSG00000025723 | 0.338379917  | -3.563284148  | 7.97E-07 | 4.22E-06 | 101.122163   | 103.702476 | 143.713336  | 48.67059813 | 31.57940276  | 37.77439267 | Nmb           |
| ENSMUSG00000029348 | 0.216136028  | -2.209988515  | 8.19E-07 | 4.33E-06 | 51.9034109   | 50.8729129 | 68.139944   | 17.6042589  | 10.24196846  | 9.188365784 | Asphd2        |
| ENSMUSG00000028755 | 0.253908053  | -1.977621942  | 8.20E-07 | 4.33E-06 | 76.1164797   | 117.39903  | 84.2457489  | 22.7819821  | 16.21645007  | 29.60695641 | Cda           |
| ENSMUSG00000030974 | 13.372376196 | 3.732370426   | 8.38E-07 | 4.43E-06 | 2.68465919   | 0.97832525 | 3.71672422  | 28.99524995 | 39.26087911  | 26.54417682 | Gm3           |
| ENSMUSG00000074796 | 0.241817268  | -2.048010825  | 8.51E-07 | 4.49E-06 | 65.3267069   | 61.6344907 | 49.5563229  | 17.6042589  | 10.24196846  | 15.31394297 | Slc4a11       |
| ENSMUSG00000025993 | 0.285966862  | -1.80680121   | 8.51E-07 | 4.49E-06 | 272.940351   | 314.042405 | 571.136621  | 124.2653569 | 68.27978976  | 138.8464163 | Slc40a1       |
| ENSMUSG00000041119 | 0.454694335  | -1.137031064  | 8.57E-07 | 4.52E-06 | 204.034098   | 283.714322 | 213.092188  | 112.8743659 | 92.17771617  | 114.3441075 | Pde9a         |
| ENSMUSG00000010826 | 2.065261273  | 1.046324307   | 8.69E-07 | 4.58E-06 | 119.914777   | 108.594103 | 89.2013812  | 197.7890264 | 219.3488246  | 241.960299  | Snhg14        |
| ENSMUSG00000009633 | 0.35219137   | -1.509556637  | 8.72E-07 | 4.60E-06 | 1302.95459   | 656.456242 | 610.78167   | 352.0851779 | 258.6097037  | 293.0067755 | Glo2          |
| ENSMUSG00000097915 | 0.325009252  | -1.621447306  | 8.73E-07 | 4.60E-06 | 68.0113661   | 90.9842481 | 99.1126458  | 28.99524995 | 29.01891065  | 25.52323829 | 330009N23Rik  |
| ENSMUSG00000026073 | 0.196975776  | -2.334909877  | 8.77E-07 | 4.62E-06 | 42.954547    | 101.745826 | 65.6621278  | 14.49762497 | 13.65595795  | 13.27208391 | lI1r2         |
| ENSMUSG00000039193 | 0.214305802  | -2.222257185  | 8.82E-07 | 4.64E-06 | 42.0596606   | 62.6128159 | 55.7508633  | 10.35544641 | 14.50945532  | 9.188365784 | Nlrc4         |
| ENSMUSG00000056328 | 0.017753906  | -5.815719739  | 8.85E-07 | 4.66E-06 | 75.65.127868 | 11200.8458 | 1439.61118  | 140.8340712 | 34.99339225  | 62.27670142 | Myh1          |
| ENSMUSG00000041653 | 0.265893809  | -1.911077907  | 8.85E-07 | 4.66E-06 | 1548.15346   | 614.388256 | 612.020588  | 299.2724013 | 164.7249928  | 274.630044  | Pnpl3a        |
| ENSMUSG00000070858 | 0.239246872  | -2.063428034  | 8.94E-07 | 4.70E-06 | 58.1676157   | 70.4394179 | 96.6348297  | 19.67534818 | 11.94896321  | 22.46044969 | Gm1673        |
| ENSMUSG00000055026 | 2.378137117  | 1.249831899   | 9.02E-07 | 4.74E-06 | 288.153419   | 155.553715 | 250.259431  | 542.6253919 | 476.2515336  | 631.95538   | Slc6a7        |
| ENSMUSG00000075010 | 0.3186791917 | -1.651260328  | 9.02E-07 | 4.74E-06 | 281.889215   | 756.245417 | 511.669034  | 168.7937765 | 173.2599665  | 151.0975707 | AW112010      |
| ENSMUSG00000054580 | 0.43010105   | -1.217252441  | 9.06E-07 | 4.75E-06 | 59.616496    | 361.980342 | 309.727018  | 177.0781336 | 161.3110033  | 183.7673157 | Pla2r1        |
| ENSMUSG00000047146 | 2.762463798  | 1.418170405   | 9.22E-07 | 4.84E-06 | 195.852344   | 112.507404 | 105.307186  | 313.7700262 | 442.9651361  | 350.1788293 | Tet1          |
| ENSMUSG00000032596 |              |               |          |          |              |            |             |             |              |             |               |

|                     |              |              |          |          |            |            |             |             |             |             |               |
|---------------------|--------------|--------------|----------|----------|------------|------------|-------------|-------------|-------------|-------------|---------------|
| ENSMUSG00000019876  | 0.164715535  | -2.601951464 | 1.22E-06 | 6.32E-06 | 42.0596606 | 94.8975491 | 115.218451  | 9.319901769 | 20.48393693 | 11.23022485 | Pkib          |
| ENSMUSG00000028289  | 3.163834928  | 1.66167433   | 1.25E-06 | 6.46E-06 | 45.6392062 | 27.393107  | 40.8839664  | 113.9099105 | 151.9225322 | 93.9255169  | Epha7         |
| ENSMUSG000000105366 | 3.244306502  | 1.697910123  | 1.25E-06 | 6.48E-06 | 19.6875007 | 29.3497575 | 35.9283341  | 94.23456233 | 101.5661873 | 76.56971486 | Gm43719       |
| ENSMUSG00000097823  | 2.866467959  | 1.519274153  | 1.26E-06 | 6.50E-06 | 38.480115  | 34.2413837 | 37.1672422  | 90.09238377 | 132.2920927 | 91.88365784 | Gm16701       |
| ENSMUSG00000057719  | 22.61975323  | 4.499511285  | 1.26E-06 | 6.51E-06 | 6.26420477 | 69.4610927 | 13.6279888  | 667.9629359 | 702.4283371 | 653.3949002 | Sh3rf2        |
| ENSMUSG00000000567  | 0.275252748  | -1.861312651 | 1.26E-06 | 6.52E-06 | 13.812505  | 186.860122 | 329.549547  | 61.09713382 | 44.38186334 | 74.5278558  | Sow9          |
| ENSMUSG00000028369  | 0.411768489  | -1.280094663 | 1.27E-06 | 6.53E-06 | 1946.37791 | 1310.95583 | 1271.11968  | 744.5565969 | 417.3602149 | 704.4413768 | Svep1         |
| ENSMUSG00000074472  | 4.985539356  | 2.31774959   | 1.27E-06 | 6.53E-06 | 9.84375035 | 12.7182282 | 8.67235651  | 59.02604454 | 60.59831341 | 36.75346313 | Zfp872        |
| ENSMUSG00000028399  | 2.223731854  | 1.152982833  | 1.28E-06 | 6.62E-06 | 1029.11935 | 673.087771 | 1359.08216  | 2289.589201 | 2301.882412 | 2211.333365 | Ptrd          |
| ENSMUSG00000030890  | 3.367245567  | 1.751568938  | 1.29E-06 | 6.65E-06 | 433.125015 | 286.649298 | 126.368623  | 941.3100787 | 967.0125224 | 947.4226053 | Ilk           |
| ENSMUSG00000039114  | 0.426459898  | -1.229518009 | 1.30E-06 | 6.67E-06 | 245.198872 | 201.535001 | 174.686038  | 93.19901769 | 69.9867845  | 103.1138827 | Nrm1          |
| ENSMUSG00000055489  | 0.014806684  | -6.0776076   | 1.31E-06 | 6.71E-06 | 51.9034109 | 682.871024 | 111.501727  | 7.248812487 | 4.26748686  | 1.020929532 | Ano5          |
| ENSMUSG00000060441  | 0.466589557  | -1.099774078 | 1.31E-06 | 6.74E-06 | 263.991487 | 369.806944 | 374.150238  | 130.4786248 | 179.2344481 | 159.2650069 | Trim5         |
| ENSMUSG00000030592  | 0.01597044   | -5.96845215  | 1.33E-06 | 6.82E-06 | 615.68184  | 10411.3373 | 1211.6521   | 118.0520891 | 26.5841853  | 51.04647658 | Ryr1          |
| ENSMUSG00000042451  | 0.005210345  | -7.5844055   | 1.33E-06 | 6.84E-06 | 105.596595 | 800.270053 | 66.9010359  | 4.142178564 | 0           | 1.020929532 | Mybph         |
| ENSMUSG000000110235 | 0.168053667  | -2.573006074 | 1.34E-06 | 6.89E-06 | 38.480115  | 36.1980342 | 50.795231   | 4.142178564 | 8.53497372  | 8.167436252 | Gm5086        |
| ENSMUSG000000089694 | 0.070418243  | -3.827906967 | 1.35E-06 | 6.90E-06 | 32.2159102 | 27.393107  | 22.3003453  | 2.071089282 | 1.706994744 | 2.041859063 | Na187         |
| ENSMUSG00000096349  | 16.03552271  | 4.003199477  | 1.36E-06 | 6.98E-06 | 2.68465919 | 1.9566505  | 1.23890807  | 48.67059813 | 23.89792642 | 24.50230876 | Gm22513       |
| ENSMUSG00000029999  | 0.411693782  | -1.280356436 | 1.36E-06 | 7.00E-06 | 183.451711 | 137.94386  | 146.911553  | 78.70139272 | 56.33082655 | 58.1929833  | Tgfa          |
| ENSMUSG00000036820  | 0.484731757  | -1.044741491 | 1.37E-06 | 7.04E-06 | 398.224446 | 503.837503 | 558.747541  | 219.5354639 | 200.5718824 | 287.9021279 | Amdhd2        |
| ENSMUSG00000027004  | 2.384803102  | 1.253870157  | 1.41E-06 | 7.24E-06 | 173.607961 | 204.469977 | 102.82937   | 401.7913207 | 383.22032   | 366.5137018 | Frzb          |
| ENSMUSG00000026435  | 0.479795357  | -1.059779545 | 1.42E-06 | 7.27E-06 | 519.034109 | 402.091677 | 360.522491  | 198.8245711 | 242.3932536 | 173.5580204 | Slc45a3       |
| ENSMUSG00000044317  | 0.492948634  | -1.020490771 | 1.46E-06 | 7.45E-06 | 178.082393 | 207.404953 | 193.296959  | 103.5544641 | 100.7126899 | 80.65343299 | Gpr4          |
| ENSMUSG00000046080  | 0.356585668  | -1.487679376 | 1.46E-06 | 7.45E-06 | 131.5483   | 164.358642 | 113.979543  | 55.91941062 | 34.99339225 | 56.15112422 | Clec9a        |
| ENSMUSG00000085348  | 0.026795125  | -5.221885646 | 1.46E-06 | 7.48E-06 | 15.2130687 | 241.646336 | 43.3617825  | 4.142178564 | 0           | 4.083718126 | Myhas         |
| ENSMUSG00000037020  | 0.380341332  | -1.394633368 | 1.52E-06 | 7.77E-06 | 183.451711 | 128.160608 | 132.563164  | 65.23931238 | 44.38186334 | 60.23484236 | Wdr62         |
| ENSMUSG00000087107  | 2.740488782  | 1.45443275   | 1.53E-06 | 7.78E-06 | 156.605119 | 307.194128 | 381.583686  | 674.1395613 | 798.0200428 | 839.2004749 | Alc62270      |
| ENSMUSG00000022240  | 0.107581259  | -3.216501317 | 1.54E-06 | 7.85E-06 | 27.7414783 | 30.3280827 | 42.1228745  | 4.142178564 | 1.706994744 | 5.104647658 | Ctndd2        |
| ENSMUSG00000079553  | 0.366510513  | -1.448073515 | 1.54E-06 | 7.86E-06 | 89.4886395 | 114.464054 | 100.351554  | 36.24406244 | 30.72590539 | 44.92089939 | Kifc1         |
| ENSMUSG00000051984  | 2.402055719  | 1.264269617  | 1.57E-06 | 7.98E-06 | 97.5426171 | 121.312331 | 64.4232198  | 219.5354639 | 222.7628141 | 241.960299  | Sec31b        |
| ENSMUSG00000094335  | 0.17095828   | -2.548283795 | 1.58E-06 | 8.05E-06 | 93.9630715 | 77.2876946 | 64.4232198  | 14.49762497 | 21.3373434  | 4.083718126 | Igkv1-117     |
| ENSMUSG00000105504  | 0.3564868379 | -1.44738142  | 1.59E-06 | 8.11E-06 | 601.363658 | 1253.23464 | 600.870415  | 273.3837852 | 310.6730434 | 316.4885146 | Gbp5          |
| ENSMUSG00000044220  | 56.0432322   | 5.808468258  | 1.60E-06 | 8.13E-06 | 0          | 1.9566505  | 0           | 19.67534818 | 41.82137123 | 52.06740611 | Nkx2-3        |
| ENSMUSG00000086841  | 0.442341118  | -1.176768742 | 1.61E-06 | 8.18E-06 | 391.960241 | 611.45328  | 732.194671  | 255.7795263 | 246.6607405 | 264.4207487 | 2410006H16Rik |
| ENSMUSG00000039981  | 0.23510077   | -2.088648831 | 1.62E-06 | 8.21E-06 | 59.0625021 | 91.9625734 | 107.785002  | 20.71089282 | 27.3119159  | 12.25115438 | Zc3h12d       |
| ENSMUSG00000035246  | 3.772983814  | 1.915705911  | 1.62E-06 | 8.25E-06 | 12.5284095 | 19.566505  | 16.1058049  | 61.09713382 | 52.06333969 | 68.40227861 | Pcvt1b        |
| ENSMUSG00000005233  | 0.323050354  | -1.630169037 | 1.64E-06 | 8.30E-06 | 85.0142076 | 140.878836 | 156.102417  | 47.63505349 | 35.84688962 | 39.81625173 | Spz25         |
| ENSMUSG00000021057  | 2.850195462  | 1.51106086   | 1.65E-06 | 8.35E-06 | 32.2159102 | 23.479806  | 34.689426   | 82.84357128 | 81.93574771 | 91.88365784 | Akap5         |
| ENSMUSG00000037375  | 0.31165829   | -1.681963005 | 1.67E-06 | 8.48E-06 | 102.911935 | 90.9842841 | 144.952244  | 31.06633923 | 46.08885809 | 27.56509733 | Hhat          |
| ENSMUSG00000040875  | 3.200259023  | 1.678188679  | 1.68E-06 | 8.49E-06 | 55.4829565 | 41.0896604 | 22.3003453  | 128.4075355 | 122.0501242 | 134.7626982 | Scap110       |
| ENSMUSG00000094334  | 7.563096295  | 2.918976988  | 1.68E-06 | 8.51E-06 | 4.47443198 | 2.93497575 | 12.3890807  | 41.42178564 | 60.59831341 | 41.85811079 | Gm11942       |
| ENSMUSG00000062510  | 0.22775511   | -2.134470073 | 1.69E-06 | 8.55E-06 | 48.3238654 | 92.9408986 | 71.8566682  | 21.74643746 | 13.65595795 | 13.72708391 | Nsl1          |
| ENSMUSG00000027219  | 0.325062697  | -1.621210088 | 1.69E-06 | 8.57E-06 | 198.66478  | 246.537963 | 149.907877  | 71.45258023 | 81.93574771 | 39.81625173 | Slc28a2       |
| ENSMUSG00000058665  | 0.017268656  | -5.855700386 | 1.71E-06 | 8.65E-06 | 18.792143  | 30.3280827 | 64.4232198  | 1.035544641 | 0           | 1.020929532 | Enc1          |
| ENSMUSG00000048924  | 0.336330053  | -1.572050398 | 1.74E-06 | 8.79E-06 | 110.071027 | 135.98721  | 90.4402893  | 27.95970531 | 38.40738174 | 46.96275845 | Ccd125        |
| ENSMUSG0000007033   | 2.757556633  | 1.463390515  | 1.74E-06 | 8.79E-06 | 34.9005694 | 52.8295634 | 34.689426   | 117.0165444 | 97.2987004  | 124.5534028 | Hspa1l        |
| ENSMUSG00000031762  | 0.25793729   | -1.954907738 | 1.76E-06 | 8.88E-06 | 171.698889 | 1308.99918 | 2721.88104  | 367.6183476 | 516.36591   | 339.969534  | Mt2           |
| ENSMUSG00000051748  | 0.189965711  | -2.396189062 | 1.80E-06 | 9.09E-06 | 133.338813 | 141.857161 | 172.208222  | 32.10188387 | 8.53497372  | 44.92089939 | Wfd21         |
| ENSMUSG00000020808  | 0.269823067  | -1.889914404 | 1.81E-06 | 9.12E-06 | 68.0113661 | 91.9625734 | 100.351554  | 14.49762497 | 31.5794022  | 23.48137923 | Pimrg         |
| ENSMUSG00000040666  | 3.171565303  | 1.665195048  | 1.81E-06 | 9.12E-06 | 1007.64208 | 2888.01613 | 1162.09577  | 5322.699455 | 5593.821776 | 5126.087178 | Sh3bgr        |
| ENSMUSG00000066682  | 0.280534931  | -1.833747677 | 1.82E-06 | 9.18E-06 | 61.7471613 | 78.2660199 | 66.9010359  | 13.46208033 | 24.75142379 | 19.3976611  | Pilrb2        |
| ENSMUSG00000020654  | 2.252155989  | 1.171306755  | 1.86E-06 | 9.38E-06 | 397.32956  | 227.949783 | 129.197993  | 598.5448025 | 657.1929764 | 672.7925613 | Adcy3         |
| ENSMUSG00000079278  | 0.017306503  | -5.852541948 | 1.87E-06 | 9.40E-06 | 38.480115  | 668.196145 | 81.76793218 | 4.142178564 | 6.125577189 | Tmem233     |               |
| ENSMUSG00000097383  | 4.813948435  | 2.267220688  | 1.92E-06 | 9.65E-06 | 10.7386367 | 9.78325249 | 8.67235651  | 50.74168741 | 35.04488962 | 55.1301947  | 1500026H17Rik |
| ENSMUSG00000055809  | 0.305980194  | -1.708489826 | 1.93E-06 | 9.70E-06 | 100.227276 | 93.9192239 | 64.4232198  | 23.4442851  | 23.84817923 | 23.84817923 | Dnaaf3        |
| ENSMUSG00000025504  | 2.15378443   | 1.106873859  | 1.94E-06 | 9.72E-06 | 87.6988667 | 97.8325249 | 69.3788521  | 162.5805086 | 200.5718824 | 187.8510338 | Eps8l2        |
| ENSMUSG00000039853  | 0.295319727  | -1.759650363 | 1.99E-06 | 9.97E-06 | 79.6448892 | 88.0492724 | 64.4232198  | 15.53316962 | 27.3119159  | 25.52323829 | Trim14        |
| ENSMUSG00000033581  | 0.426081497  | -1.230798693 | 2.01E-06 | 1.01E-05 | 134.232959 | 179.033521 | 209.375464  | 79.73693736 | 69.9867845  | 72.48599674 | Igf2bp2       |
| ENSMUSG00000034459  | 0.109200209  | -3.19495248  | 2.03E-06 | 1.02E-05 | 655.951728 | 3120.85754 | 2947.3623   | 198.8245711 | 210.8138509 | 324.655591  | Ifit1         |
| ENSMUSG00000052951  | 0.084842718  | -3.559065353 | 2.07E-06 | 1.04E-05 | 48.3238654 | 25.4364565 | 28.4948557  | 5.177723205 | 2.560492116 | 1.020929532 | 130021I20Rik  |
| ENSMUSG00000038745  | 56.34852139  | 5.816305849  | 2.07E-06 | 1.04E-05 | 0          | 0.97832525 | 1.23890807  | 39.35096936 | 16.21645007 | 61.25577189 | Nlrp6         |
| ENSMUSG00000031253  | 0.4955956028 | -1.011715881 | 2.11E-06 | 1.06E-05 | 617.471613 | 394.265075 | 595.914783  | 274.4193299 | 248.3677352 | 274.630044  | Srxp2         |
| ENSMUSG00000027654  | 0.13323994   | -2.907901482 | 2.15E-06 | 1.08E-05 | 37.5855286 | 54.7862139 | 48.3174148  | 11.09546584 | 5.177723205 | 2.041859063 | Fam83d        |
| ENSMUSG00000044231  | 2.49197327   | 1.317288594  | 2.18E-06 | 1.09E-05 | 36.6903422 | 50.8729129 | 48.3174148  | 100.4478302 | 115.2221452 | 121.4906143 | Nhlrc1        |
| ENSMUSG00000074277  | 0.294317866  | -1.764552973 | 2.18E-06 | 1.09E-05 | 70.6960252 | 70.4394179 | 50.795231   | 18.63980354 | 19.63043956 | 18.37673157 | Phldb3        |
| ENSMUSG00000042029  | 0.493387961  | -1.01920558  | 2.21E-06 | 1.10E-05 | 312.313532 | 302.302502 | 277.515408  | 142.9051605 | 180.0879455 | 116.3859666 | Ncapg2        |
| ENSMUSG00000085412  | 0.112667465  | -3.149857124 | 2.23E-06 | 1.11E-05 | 34.9005694 | 24.4581312 | 44.6006906  | 6.213267846 | 2.560492116 | 3.062788595 | Halr1         |
| ENSMUSG00000041607  | 0.39183466   | -1.187104353 | 2.23E-06 | 1.11E-05 | 953.054011 | 1460.6396  | 806.529155  | 516.7367759 | 383.22032   | 515.5694134 | Mbp           |
| ENSMUS              |              |              |          |          |            |            |             |             |             |             |               |

|                      |              |              |          |          |             |            |            |             |             |             |               |
|----------------------|--------------|--------------|----------|----------|-------------|------------|------------|-------------|-------------|-------------|---------------|
| ENSMUSG00000000753   | 0.455162617  | -1.135546024 | 2.78E-06 | 1.37E-05 | 9049.09123  | 5949.19584 | 8403.51346 | 4038.6241   | 2437.588494 | 4176.622713 | Serpinf1      |
| ENSMUSG000000006522  | 2.858144574  | 1.515078894  | 2.80E-06 | 1.38E-05 | 127.073868  | 92.9408986 | 86.7235651 | 277.5259638 | 193.7439034 | 408.3718126 | Ithi3         |
| ENSMUSG0000000084111 | 6.807459128  | 2.767116415  | 2.80E-06 | 1.38E-05 | 3.57954558  | 8.80492724 | 6.19454036 | 51.77723205 | 45.23536071 | 28.58602688 | Gm15710       |
| ENSMUSG0000000049404 | 0.461053197  | -1.116994874 | 2.84E-06 | 1.39E-05 | 123.494323  | 139.900511 | 158.580231 | 68.34594631 | 60.59831341 | 65.33949002 | Rarres1       |
| ENSMUSG0000000038663 | 0.036339543  | -4.782315906 | 2.85E-06 | 1.40E-05 | 103.806822  | 855.056267 | 115.218451 | 18.63980354 | 10.24196846 | 10.20929532 | Fsd2          |
| ENSMUSG0000000029605 | 0.457421565  | 1.128403713  | 2.86E-06 | 1.41E-05 | 148.551142  | 216.20988  | 187.075119 | 77.66584808 | 83.64274245 | 90.86272831 | Oas1b         |
| ENSMUSG0000000031972 | 0.017305707  | -5.852608313 | 2.88E-06 | 1.41E-05 | 4614.92914  | 85027.2257 | 10085.9506 | 1000.336123 | 282.5076301 | 443.0834167 | Acta1         |
| ENSMUSG0000000020330 | 0.290129467  | -1.785231263 | 2.89E-06 | 1.42E-05 | 86.8039804  | 156.53204  | 135.04098  | 24.85307138 | 49.50284757 | 34.71160407 | Hmmr          |
| ENSMUSG0000000063130 | 0.033941756  | -4.880795002 | 2.90E-06 | 1.42E-05 | 39.3750014  | 19.566505  | 26.0170695 | 0           | 8.53497372  | 2.041859063 | Calml3        |
| ENSMUSG0000000026095 | 0.483292681  | -1.049030947 | 2.93E-06 | 1.44E-05 | 192.400575  | 270.017769 | 283.709949 | 122.1942676 | 121.1966268 | 116.3859666 | Asnsd1        |
| ENSMUSG0000000064350 | 2.986215367  | 1.578318217  | 2.99E-06 | 1.46E-05 | 34.005683   | 35.219709  | 32.2116099 | 125.3009016 | 72.54772662 | 106.1766713 | mt-Ty         |
| ENSMUSG0000000044026 | 2.708643228  | 1.43757038   | 3.01E-06 | 1.48E-05 | 49.2187517  | 51.8512382 | 30.9727018 | 117.0165444 | 104.1266794 | 139.8673458 | Slc35g1       |
| ENSMUSG0000000037860 | 0.375840073  | -1.411809195 | 3.08E-06 | 1.51E-05 | 157.500006  | 257.29954  | 193.269659 | 69.38149095 | 98.15219778 | 60.23484236 | Aim2          |
| ENSMUSG0000000074480 | 0.298638265  | -1.743529063 | 3.08E-06 | 1.51E-05 | 141.39205   | 110.550753 | 260.170695 | 51.77723205 | 54.62383181 | 45.94182892 | Mex3a         |
| ENSMUSG0000000042258 | 27.59618103  | 4.786396725  | 3.10E-06 | 1.52E-05 | 1.78977279  | 0          | 1.23890807 | 21.74643746 | 25.60492116 | 36.75346313 | Isl1          |
| ENSMUSG0000000031445 | 4.773763803  | 2.255127186  | 3.11E-06 | 1.52E-05 | 17.8977279  | 37.1763594 | 28.948857  | 111.8388212 | 74.25427136 | 212.3533426 | Proz          |
| ENSMUSG0000000083567 | 2.368916217  | 1.244227175  | 3.15E-06 | 1.54E-05 | 50.1136381  | 66.5261169 | 60.7064956 | 130.4786248 | 165.5784902 | 122.5115438 | Gm11451       |
| ENSMUSG0000000035095 | 0.274759728  | -1.863757535 | 3.18E-06 | 1.55E-05 | 61.7471613  | 45.0029614 | 61.9454036 | 15.53316962 | 14.50945532 | 16.3348725  | Fam167a       |
| ENSMUSG0000000047415 | 0.31150513   | -1.682672171 | 3.21E-06 | 1.56E-05 | 79.6448892  | 109.572428 | 73.095763  | 20.71089282 | 34.13989488 | 26.54416782 | Gpr68         |
| ENSMUSG0000000086096 | 0.196047192  | -2.350727116 | 3.22E-06 | 1.57E-05 | 34.9005694  | 37.1763594 | 40.8839664 | 6.213267846 | 7.681476348 | 8.167436252 | Gm12688       |
| ENSMUSG0000000032501 | 0.425214446  | -1.233737483 | 3.28E-06 | 1.59E-05 | 589.730135  | 861.904544 | 1221.56336 | 423.5377582 | 349.9339225 | 362.4299837 | Tri1b1        |
| ENSMUSG0000000071178 | 118.3505611  | 6.886922735  | 3.37E-06 | 1.64E-05 | 12.5284095  | 6.84827674 | 7.43344844 | 867.7864092 | 12.80246058 | 2298.112375 | Serpina1b     |
| ENSMUSG0000000049241 | 0.337111338  | -1.568702946 | 3.38E-06 | 1.64E-05 | 182.556825  | 127.182282 | 271.320868 | 77.66584808 | 59.74481604 | 58.192983   | Hcar1         |
| ENSMUSG0000000032420 | 0.481139528  | -1.055472765 | 3.41E-06 | 1.65E-05 | 391.065355  | 365.893643 | 267.604144 | 186.3980354 | 171.5529718 | 135.7836277 | Nt5e          |
| ENSMUSG0000000044303 | 0.100544469  | -3.314094381 | 3.41E-06 | 1.65E-05 | 53.6931837  | 24.4581312 | 107.785002 | 5.177723205 | 3.413989488 | 10.20929532 | Cdkn2a        |
| ENSMUSG0000000036526 | 0.261790263  | -1.933516658 | 3.55E-06 | 1.72E-05 | 60.8522749  | 122.290656 | 83.0068409 | 16.56871426 | 27.3119159  | 25.52323829 | Card11        |
| ENSMUSG0000000028068 | 0.337055384  | -1.568942422 | 3.61E-06 | 1.75E-05 | 149.446028  | 152.618739 | 107.785002 | 54.88386597 | 54.62383181 | 28.58602688 | Iqgap3        |
| ENSMUSG0000000026582 | 0.273948768  | -1.868021981 | 3.64E-06 | 1.76E-05 | 109.17614   | 95.8758744 | 80.5290247 | 34.17297315 | 30.72590539 | 13.27208391 | Sele          |
| ENSMUSG0000000021384 | 0.299313572  | -1.740270396 | 3.64E-06 | 1.76E-05 | 70.6960252  | 140.878836 | 116.457359 | 39.35069636 | 27.3119159  | 31.64881548 | Susd3         |
| ENSMUSG0000000030409 | 3.948494309  | 1.981302611  | 3.70E-06 | 1.79E-05 | 27.7414783  | 59.6778402 | 19.8225292 | 124.2653569 | 175.8204586 | 125.5748324 | Lsmem2        |
| ENSMUSG0000000021301 | 0.064490363  | -3.954772603 | 3.72E-06 | 1.80E-05 | 20.5823871  | 24.4581312 | 29.7337937 | 1.035544641 | 1.706994744 | 2.041859063 | Hecw1         |
| ENSMUSG0000000029576 | 0.1462416061 | -1.464281204 | 3.75E-06 | 1.81E-05 | 235.355122  | 157.510365 | 156.102417 | 56.95495526 | 52.91683706 | 89.84179877 | Radil         |
| ENSMUSG0000000024727 | 0.266709508  | -1.90665884  | 3.76E-06 | 1.81E-05 | 65.3267069  | 49.8945877 | 61.9454036 | 20.71089282 | 15.3629527  | 11.23022485 | Trpm6         |
| ENSMUSG0000000037646 | 2.551712986  | 1.351466065  | 3.80E-06 | 1.83E-05 | 1011.22163  | 627.106484 | 408.839664 | 1842.233916 | 1800.879455 | 1586.524492 | Vps13b        |
| ENSMUSG0000000055994 | 0.4044343093 | -1.306023478 | 3.83E-06 | 1.85E-05 | 110.071027  | 114.464054 | 92.9181054 | 40.386241   | 37.55388467 | 51.04647658 | Nod2          |
| ENSMUSG0000000026308 | 2.800688437  | 1.485781499  | 3.86E-06 | 1.86E-05 | 164.659097  | 439.268037 | 24.5187074 | 771.4807576 | 802.2875297 | 794.2831755 | Khlh30        |
| ENSMUSG0000000035045 | 2.2431637327 | 1.164552884  | 3.89E-06 | 1.87E-05 | 131.5483    | 76.3093694 | 92.9810545 | 223.6776425 | 233.0047825 | 219.4998493 | Zc3h12b       |
| ENSMUSG0000000024210 | 0.185350076  | -2.431675384 | 3.92E-06 | 1.89E-05 | 50.1136381  | 186.860122 | 94.1570135 | 22.7819821  | 22.19093167 | 16.3348725  | Ip6k3         |
| ENSMUSG0000000045382 | 0.429278939  | -1.220012699 | 3.93E-06 | 1.89E-05 | 339.161944  | 552.753765 | 499.279953 | 209.1800175 | 238.9792642 | 148.0347821 | Cxcr4         |
| ENSMUSG0000000010461 | 0.141263565  | -2.823538682 | 3.99E-06 | 1.92E-05 | 82.3295484  | 113.485729 | 43.3617825 | 16.56871426 | 31.43989488 | 14.29301344 | Eya4          |
| ENSMUSG0000000031669 | 0.239324143  | -2.062962154 | 3.99E-06 | 1.92E-05 | 67.1164797  | 102.724151 | 45.8395987 | 17.6042589  | 18.77694218 | 15.31394297 | Sostdc1       |
| ENSMUSG0000000038670 | 0.023996095  | -1.381056542 | 4.10E-06 | 1.97E-05 | 1047.01708  | 19098.8655 | 1751.81601 | 173.9714997 | 191.1834113 | 160.2859364 | Mypbc2        |
| ENSMUSG0000000030154 | 0.153326976  | -2.705316553 | 4.10E-06 | 1.97E-05 | 49.2187517  | 38.1546847 | 29.7337937 | 3.106633923 | 8.53497372  | 6.125577189 | Klrb1f        |
| ENSMUSG0000000015957 | 0.4365152641 | -1.197094971 | 4.11E-06 | 1.97E-05 | 159.289778  | 154.575389 | 143.713336 | 74.55921415 | 49.50284757 | 76.56971486 | Wnt11         |
| ENSMUSG0000000076609 | 0.150173102  | -2.735301669 | 4.19E-06 | 2.01E-05 | 2081.50576  | 5623.41353 | 3218.68317 | 545.7320258 | 827.8924508 | 266.4626707 | Igkc          |
| ENSMUSG0000000019564 | 0.498210712  | -1.005172053 | 4.19E-06 | 2.01E-05 | 179.872165  | 227.949783 | 249.020523 | 118.0520891 | 101.5661873 | 107.1976008 | Arid3a        |
| ENSMUSG0000000029298 | 0.396477311  | -1.454121314 | 4.21E-06 | 2.02E-05 | 1021.96026  | 1453.79132 | 553.791908 | 354.1562672 | 413.9462254 | 337.9276749 | Gbp9          |
| ENSMUSG0000000060240 | 2.116941707  | 1.084024595  | 4.23E-06 | 2.03E-05 | 73.880844   | 56.7428644 | 75.733924  | 137.7274373 | 150.2155375 | 147.0138525 | Cend1         |
| ENSMUSG0000000095217 | 8.757743463  | 3.13055919   | 4.25E-06 | 2.04E-05 | 2.68465919  | 2.93497575 | 4.95563229 | 27.95970531 | 24.75143239 | 37.77439267 | Hist1h2bn     |
| ENSMUSG0000000039960 | 0.406302595  | -1.299373515 | 4.27E-06 | 2.04E-05 | 528.87786   | 652.542941 | 1095.19474 | 304.4501245 | 351.6409173 | 267.4835373 | Rho           |
| ENSMUSG0000000025216 | 0.039421287  | -4.664881318 | 4.29E-06 | 2.05E-05 | 7.15909116  | 206.426627 | 55.7508633 | 5.177723205 | 3.413989488 | 2.041859063 | Lbx1          |
| ENSMUSG0000000049687 | 0.456143967  | -1.13243886  | 4.31E-06 | 2.06E-05 | 178.977279  | 165.336967 | 247.781615 | 97.34119626 | 85.3497372  | 86.77901018 | Fam109b       |
| ENSMUSG000000002034  | 3.540482855  | 1.82394613   | 4.37E-06 | 2.09E-05 | 51.0085245  | 72.3960684 | 33.450518  | 201.931205  | 243.246751  | 112.3022485 | Esco2         |
| ENSMUSG0000000050368 | 0.189874336  | -2.396883172 | 4.39E-06 | 2.09E-05 | 45.6392062  | 34.2413837 | 35.9283341 | 8.284357128 | 8.53497372  | 5.104647658 | Hoxd10        |
| ENSMUSG0000000029053 | 0.398820656  | -1.326187947 | 4.40E-06 | 2.10E-05 | 209.403417  | 185.881797 | 117.696267 | 68.34594631 | 66.57279501 | 70.44413768 | Prkc          |
| ENSMUSG0000000022015 | 0.012846467  | -6.282484548 | 4.45E-06 | 2.12E-05 | 15.2130687  | 26.4147817 | 39.6450583 | 0           | 0.853497372 | 0           | Tnfrsf11      |
| ENSMUSG0000000043673 | 2.506604192  | 1.325734204  | 4.46E-06 | 2.12E-05 | 178.082393  | 92.9408986 | 113.979543 | 270.2771513 | 383.22032   | 313.4253662 | Kcnc3         |
| ENSMUSG0000000044708 | 0.175208185  | -2.512857921 | 4.48E-06 | 2.13E-05 | 34.005683   | 38.1546847 | 50.795231  | 7.248812487 | 4.26748608  | 10.20929532 | Kcnj10        |
| ENSMUSG0000000024795 | 0.117735066  | -1.259339843 | 4.49E-06 | 2.14E-05 | 33.338073   | 138.922185 | 99.1126458 | 45.5639642  | 53.77033443 | 56.15112423 | Kif20b        |
| ENSMUSG0000000033268 | 0.121670849  | -3.038944537 | 4.60E-06 | 2.19E-05 | 122.2159102 | 32.3497575 | 68.139944  | 7.248812487 | 2.560492116 | 6.125577189 | Duox1         |
| ENSMUSG0000000036377 | 2.896882782  | 1.534501309  | 4.64E-06 | 2.21E-05 | 83.2244348  | 49.8945877 | 47.0785068 | 183.2914015 | 128.8781032 | 213.3742721 | C530008M17Rik |
| ENSMUSG0000000021815 | 0.127144319  | -2.975461091 | 4.66E-06 | 2.21E-05 | 65.3267069  | 523.404008 | 158.580233 | 20.71089282 | 32.43290013 | 41.85811079 | Mcs51         |
| ENSMUSG0000000058258 | 2.224314033  | 1.153360485  | 4.67E-06 | 2.22E-05 | 88.5937531  | 69.4610927 | 60.7064956 | 167.7582318 | 179.2344481 | 141.9092049 | Idl1          |
| ENSMUSG0000000045322 | 0.271535898  | -1.880785156 | 4.68E-06 | 2.22E-05 | 81.434662   | 135.008884 | 66.9010359 | 19.67534818 | 31.57940276 | 25.52323829 | Tlr9          |
| ENSMUSG0000000020435 | 0.387754217  | -1.366785625 | 4.72E-06 | 2.24E-05 | 90.3835259  | 80.2226704 | 96.6348297 | 40.386241   | 30.72590539 | 32.66974501 | Osbp2         |
| ENSMUSG0000000029804 | 2.021352978  | 1.015321274  | 4.95E-06 | 2.34E-05 | 371.68467   | 381.546847 | 215.570005 | 655.4997578 | 589.766684  | 608.4740008 | Herc3         |
| ENSMUSG0000000042751 | 0.421939241  | -1.244892827 | 5.04E-06 | 2.38E-05 | 214.772735  | 180.990171 | 297.337937 | 107.6966427 | 78.52175822 | 106.1766713 | Nmnat2        |
| ENSMUSG0000000037337 | 0.2625       |              |          |          |             |            |            |             |             |             |               |

|                     |             |              |          |          |             |            |            |             |             |             |               |
|---------------------|-------------|--------------|----------|----------|-------------|------------|------------|-------------|-------------|-------------|---------------|
| ENSMUSG00000006585  | 0.351139935 | -1.509882013 | 6.02E-06 | 2.80E-05 | 87.6988667  | 126.203957 | 135.04098  | 28.99524995 | 46.94235546 | 45.94182892 | Cdt1          |
| ENSMUSG000000040165 | 0.023516061 | -5.410209763 | 6.05E-06 | 2.82E-05 | 29.531251   | 17.6098545 | 34.689426  | 1.035544641 | 0.853493732 | 0           | Cd209c        |
| ENSMUSG000000025551 | 3.212317398 | 1.683614448  | 6.10E-06 | 2.84E-05 | 720.255691  | 128.160608 | 85.484657  | 527.0922223 | 542.8243286 | 490.0461751 | Fgf14         |
| ENSMUSG000000095677 | 0.340180362 | -1.555628234 | 6.32E-06 | 2.94E-05 | 96.6477307  | 79.2443451 | 107.785002 | 30.03079459 | 28.89792642 | 42.87904032 | Dynl1f        |
| ENSMUSG000000016566 | 0.012147565 | -6.363188989 | 6.35E-06 | 2.95E-05 | 170.7836367 | 34.2413837 | 40.8839664 | 1.035544641 | 0           | 0           | Hoxc11        |
| ENSMUSG000000087626 | 4.013776451 | 2.004960267  | 6.40E-06 | 2.97E-05 | 45.6392062  | 35.219709  | 13.6279888 | 95.27010697 | 126.3176111 | 162.3277955 | Gm15050       |
| ENSMUSG000000028078 | 0.336626929 | -1.570777502 | 6.41E-06 | 2.98E-05 | 229.985804  | 156.53204  | 116.457359 | 50.74168741 | 72.54727662 | 45.94182892 | Dck2          |
| ENSMUSG000000046345 | 0.02415803  | -5.371353374 | 6.54E-06 | 3.03E-05 | 9.84375035  | 152.618739 | 28.4948857 | 1.035544641 | 3.413989488 | 0           | Smco1         |
| ENSMUSG000000049892 | 0.410419582 | -1.28482853  | 6.56E-06 | 3.04E-05 | 712.329571  | 403.070002 | 418.750929 | 265.0994281 | 181.794402  | 183.7673157 | Rasd1         |
| ENSMUSG000000085055 | 0.129008726 | -2.954459448 | 6.61E-06 | 3.06E-05 | 25.9517055  | 29.3497575 | 40.8839664 | 4.142178564 | 5.974481604 | 2.041859063 | Gm15958       |
| ENSMUSG000000041757 | 2.058402153 | 1.041524871  | 6.69E-06 | 3.10E-05 | 197.769893  | 158.48869  | 157.341325 | 370.7249815 | 269.7051695 | 419.6020375 | Plekha6       |
| ENSMUSG000000030092 | 8.026444848 | 3.004761116  | 6.80E-06 | 3.15E-05 | 4.47443198  | 14.6748787 | 1.23890807 | 65.23931238 | 52.91683706 | 49.00461751 | Cntn6         |
| ENSMUSG000000087881 | 45.82710309 | 5.518129185  | 6.88E-06 | 3.18E-05 | 0.8948864   | 0.97832525 | 0          | 39.35069636 | 38.40738174 | 14.29301344 | Gm22442       |
| ENSMUSG000000077714 | 17.35592962 | 4.117356735  | 6.94E-06 | 3.21E-05 | 1.78977279  | 1.9566505  | 1.23890807 | 44.52841956 | 29.01891065 | 14.29301344 | Snord17       |
| ENSMUSG000000025577 | 0.453927526 | -1.13946612  | 7.00E-06 | 3.23E-05 | 170.923302  | 119.35568  | 147.430061 | 66.27485703 | 62.30530815 | 70.44413768 | Cbx2          |
| ENSMUSG000000032715 | 0.468064714 | -1.095220086 | 7.08E-06 | 3.26E-05 | 178.977279  | 171.206919 | 189.552935 | 78.70139272 | 68.27978976 | 106.1766713 | Trib3         |
| ENSMUSG000000074657 | 0.428574924 | -1.222380654 | 7.09E-06 | 3.27E-05 | 205.823871  | 155.553715 | 125.129715 | 70.41703559 | 67.42629239 | 71.46506721 | Klf5a         |
| ENSMUSG000000043366 | 0.438650434 | -1.188856399 | 7.11E-06 | 3.28E-05 | 708.750025  | 508.729129 | 356.805525 | 252.6728924 | 212.5208456 | 226.646356  | Olfir7        |
| ENSMUSG000000028927 | 0.221018178 | -2.177763067 | 7.15E-06 | 3.29E-05 | 98.4375035  | 412.853255 | 185.836211 | 52.81277669 | 45.23536071 | 56.15112423 | Padl2         |
| ENSMUSG000000052087 | 0.311548654 | -1.682470609 | 7.22E-06 | 3.32E-05 | 85.0142076  | 131.095853 | 89.2013812 | 44.52841956 | 26.45841853 | 24.50230876 | Rgs14         |
| ENSMUSG000000048355 | 0.277761324 | -1.848082367 | 7.22E-06 | 3.33E-05 | 79.6448892  | 63.5911412 | 123.890807 | 30.03079459 | 26.45841853 | 17.35580204 | Anes1         |
| ENSMUSG000000043008 | 0.458891624 | -1.12377462  | 7.30E-06 | 3.36E-05 | 290.838079  | 297.410876 | 218.047821 | 151.1895176 | 94.73820829 | 125.5743324 | Klfh6         |
| ENSMUSG000000022340 | 0.337588257 | -1.566663374 | 7.34E-06 | 3.38E-05 | 12.732987   | 76.3093694 | 65.6621278 | 33.13742851 | 23.89792642 | 22.4604969  | Sybu          |
| ENSMUSG000000053062 | 0.459104488 | -1.12310556  | 7.45E-06 | 3.43E-05 | 2743.72169  | 2019.26331 | 1346.69307 | 1054.184445 | 867.1533299 | 885.1459039 | Iam2          |
| ENSMUSG000000027298 | 2.026676674 | 1.019115947  | 7.46E-06 | 3.43E-05 | 186.13637   | 141.857161 | 128.84644  | 256.815071  | 350.7874199 | 320.5718729 | Tyro3         |
| ENSMUSG000000026027 | 2.192742837 | 1.132736624  | 7.57E-06 | 3.48E-05 | 355.268899  | 530.252285 | 279.993224 | 806.6892754 | 751.9311847 | 1000.510941 | Stradb        |
| ENSMUSG000000107091 | 0.23117549  | -2.112939647 | 7.58E-06 | 3.48E-05 | 108.821254  | 180.990171 | 216.184377 | 52.81277669 | 58.03782129 | 54.10926517 | Gm43343       |
| ENSMUSG000000025938 | 0.136846085 | -2.869373938 | 7.63E-06 | 3.50E-05 | 43.8494334  | 219.144856 | 70.6177601 | 21.74643746 | 12.80246608 | 11.23022485 | Sloca51       |
| ENSMUSG000000026589 | 0.344109678 | -1.203868509 | 7.70E-06 | 3.54E-05 | 970.951739  | 578.190222 | 561.225357 | 326.1965619 | 238.1257668 | 353.2416179 | Sec16b        |
| ENSMUSG000000021676 | 0.386137403 | -1.372813788 | 7.75E-06 | 3.56E-05 | 451.91763   | 346.327138 | 366.716789 | 152.2250622 | 90.47072143 | 208.2696244 | Iqgap2        |
| ENSMUSG000000027861 | 0.382239919 | -1.387449642 | 7.77E-06 | 3.56E-05 | 181.661938  | 270.071769 | 361.761157 | 127.3719908 | 85.3497372  | 98.00923503 | Casq2         |
| ENSMUSG000000072849 | 91.28589329 | 6.512320028  | 7.80E-06 | 3.58E-05 | 13.4232959  | 35.219709  | 11.1501727 | 1984.103532 | 25.6049126  | 3453.804605 | Serpin1a      |
| ENSMUSG000000098090 | 0.288095418 | -1.79538138  | 7.82E-06 | 3.58E-05 | 62.6420477  | 83.1576461 | 70.6177601 | 26.92416067 | 23.04442904 | 12.25115438 | 2700099C18Rik |
| ENSMUSG000000031351 | 0.298962153 | -1.741965236 | 7.87E-06 | 3.61E-05 | 233.565349  | 118.377355 | 229.197993 | 34.17297315 | 71.69377925 | 67.38134908 | Zfp185        |
| ENSMUSG000000024910 | 0.223656228 | -2.223656228 | 7.93E-06 | 3.63E-05 | 53.6931887  | 111.529078 | 48.3174148 | 14.49762497 | 17.92344297 | 15.31394297 | Ctsw          |
| ENSMUSG000000062248 | 0.359094091 | -1.477566183 | 8.24E-06 | 3.76E-05 | 83.2244348  | 147.727113 | 141.23552  | 46.59950885 | 47.79585283 | 38.7953222  | Cks2          |
| ENSMUSG000000073982 | 0.495721686 | -1.012397722 | 8.35E-06 | 3.81E-05 | 834.034121  | 1408.78836 | 1461.91153 | 596.4737132 | 583.792204  | 655.4367592 | Rhog          |
| ENSMUSG000000084843 | 3.631449411 | 1.860545482  | 8.38E-06 | 3.82E-05 | 24.1619327  | 75.3310441 | 34.689426  | 147.047339  | 179.2344481 | 161.306866  | B230312C02Rik |
| ENSMUSG000000050071 | 0.027640882 | -5.177052524 | 8.62E-06 | 3.92E-05 | 8.94886395  | 52.8295634 | 43.3617825 | 2.071089822 | 0.853493732 | 0           | Bex1          |
| ENSMUSG000000085331 | 15.38667626 | 3.943046188  | 8.70E-06 | 3.96E-05 | 1.78977279  | 2.93497575 | 0          | 24.85307138 | 20.48393669 | 31.64881548 | Gm11274       |
| ENSMUSG000000049307 | 0.292483924 | -1.773570765 | 8.71E-06 | 3.96E-05 | 52.7982973  | 50.8729129 | 55.7508633 | 16.56871426 | 11.94896321 | 18.37673157 | Fut4          |
| ENSMUSG000000103364 | 0.216189668 | -2.20963052  | 8.75E-06 | 3.98E-05 | 101.122163  | 162.401991 | 397.689491 | 57.18433292 | 50.02545704 | Gm38157     |               |
| ENSMUSG000000026628 | 2.883490843 | 1.527816441  | 8.83E-06 | 4.01E-05 | 1285.05686  | 1110.39916 | 1556.06854 | 5143.550232 | 1748.816115 | 4501.278304 | Atf3          |
| ENSMUSG000000043122 | 0.372582812 | -1.424366972 | 8.85E-06 | 4.02E-05 | 523.508541  | 236.75471  | 312.204834 | 157.4027854 | 126.3176111 | 116.3859666 | A530016L24Rik |
| ENSMUSG000000096054 | 2.389785617 | 1.256881203  | 8.89E-06 | 4.03E-05 | 5109.80132  | 3088.57281 | 2090.03792 | 8639.54894  | 8184.1863   | 7769.273735 | Syme1         |
| ENSMUSG000000056656 | 3.390087947 | 1.761322701  | 8.98E-06 | 4.07E-05 | 15.2130687  | 15.653204  | 13.6279888 | 49.70614277 | 48.6493502  | 53.08833564 | Apol8         |
| ENSMUSG000000059412 | 0.311889935 | -1.680891097 | 8.99E-06 | 4.07E-05 | 69.8011388  | 56.7428644 | 83.0068409 | 25.88861603 | 16.21645007 | 23.48137923 | Fxyd2         |
| ENSMUSG000000056966 | 0.271723934 | -1.879791756 | 9.04E-06 | 4.09E-05 | 66.2215933  | 58.6995149 | 55.7508633 | 10.35544641 | 15.3629527  | 23.48137923 | Gjc3          |
| ENSMUSG000000087400 | 2.353370801 | 1.234728652  | 9.06E-06 | 4.10E-05 | 101.122163  | 56.7428644 | 78.0512086 | 209.1800175 | 164.7249928 | 182.7463861 | Gm15270       |
| ENSMUSG000000026077 | 4.275819295 | 2.096200883  | 9.15E-06 | 4.14E-05 | 25.9517055  | 43.0463109 | 91.6791974 | 142.9051605 | 233.0047855 | 305.2579299 | Npas2         |
| ENSMUSG000000028001 | 2366.368926 | 11.2084593   | 9.22E-06 | 4.17E-05 | 0           | 0          | 1.23890807 | 733.1656058 | 1.706994744 | 1878.510338 | Fga           |
| ENSMUSG000000053886 | 0.279893589 | -1.837049655 | 9.26E-06 | 4.18E-05 | 56.3778429  | 66.5261169 | 68.139944  | 20.71089282 | 22.19093167 | 10.20929532 | Sh2d4a        |
| ENSMUSG000000091650 | 70.11962202 | 6.131746314  | 9.41E-06 | 4.25E-05 | 0.8948864   | 0          | 0          | 18.63980354 | 17.06994744 | 41.85811079 | Apol11a       |
| ENSMUSG000000110453 | 5.777129676 | 2.53052878   | 9.53E-06 | 4.30E-05 | 7.15909116  | 5.86995149 | 3.71672422 | 32.10188387 | 35.84688962 | 30.62788595 | Gm32352       |
| ENSMUSG000000026062 | 2.74643737  | 1.457561393  | 9.55E-06 | 4.31E-05 | 56.3778429  | 128.160608 | 69.3788521 | 216.42883   | 225.3233062 | 256.2533124 | Slc9a2        |
| ENSMUSG000000090066 | 0.042752845 | -4.547835768 | 9.60E-06 | 4.33E-05 | 91.2784123  | 1014.52328 | 218.047821 | 25.88861603 | 9.388471092 | 21.43952016 | 1110002E22Rik |
| ENSMUSG000000016942 | 10.40502122 | 3.379208003  | 9.78E-06 | 4.40E-05 | 11.6335231  | 5.86995149 | 11.1501727 | 96.30565161 | 17.92344481 | 183.7673157 | Tmprss6       |
| ENSMUSG000000027517 | 2.133478915 | 1.079592414  | 1.01E-05 | 4.45E-05 | 337.372171  | 407.961629 | 278.754316 | 652.3931238 | 567.575524  | 947.4226053 | Glyc1         |
| ENSMUSG000000022978 | 0.471232815 | -1.082735337 | 1.03E-05 | 4.62E-05 | 170.028415  | 219.144856 | 226.720177 | 82.84357128 | 117.7826373 | 88.82086924 | Mis18a        |
| ENSMUSG000000041797 | 0.057194198 | -4.127987387 | 1.04E-05 | 4.64E-05 | 24.1619327  | 17.6098545 | 26.0170695 | 1.035544641 | 0.853493732 | 2.041859063 | Gjd3          |
| ENSMUSG00000102553  | 3.497515219 | 1.806331985  | 1.04E-05 | 4.66E-05 | 18.7926143  | 12.7182282 | 19.8225292 | 49.70614277 | 72.54727662 | 56.15112423 | D930036K23Rik |
| ENSMUSG000000021823 | 3.092927054 | 1.628972808  | 1.04E-05 | 4.66E-05 | 2825.15635  | 1738.48397 | 756.972832 | 5591.941062 | 5747.451303 | 5123.024389 | Vcl           |
| ENSMUSG000000027022 | 0.139789212 | -6.180316149 | 1.05E-05 | 4.69E-05 | 437.599447  | 857.795578 | 821.975578 | 102.5189195 | 12.80246608 | 20.41859063 | Kirp2         |
| ENSMUSG000000079685 | 0.145248711 | -2.783402737 | 1.05E-05 | 4.70E-05 | 34.005683   | 31.306408  | 32.2116099 | 4.142178564 | 7.681476348 | 2.041859063 | Ulpb1         |
| ENSMUSG000000052142 | 0.326250924 | -1.615946106 | 1.07E-05 | 4.78E-05 | 121.70455   | 185.881797 | 111.501727 | 41.42178564 | 63.15880553 | 31.64881548 | Rasal3        |
| ENSMUSG000000059908 | 3418.731678 | 11.73924548  | 1.07E-05 | 4.78E-05 | 0           | 0          | 1.23890807 | 1328.603774 | 0.853493732 | 2446.147158 | Mug1          |
| ENSMUSG000000051000 | 3.304208    | 1.6012344    | 1.07E-05 | 4.79E-05 | 85.909094   | 230.884749 | 27.9737377 | 387.2936957 | 436.1371571 | 435.93691   | Fam160a1      |
| ENSMUSG000000004885 | 0.100717897 | -3.311608033 | 1.07E-05 | 4.80E-05 | 32.2159102  | 1          |            |             |             |             |               |

|                    |              |              |          |          |            |            |            |  |             |             |             |               |
|--------------------|--------------|--------------|----------|----------|------------|------------|------------|--|-------------|-------------|-------------|---------------|
| ENSMUSG00000030433 | 0.062420681  | -4.001832091 | 1.41E-05 | 6.22E-05 | 13.4232959 | 155.553715 | 30.9727018 |  | 3.106633923 | 4.26748686  | 5.104647658 | Sbk2          |
| ENSMUSG00000043531 | 0.126520162  | -2.982560785 | 1.42E-05 | 6.26E-05 | 55.4829565 | 37.1763594 | 27.2559776 |  | 7.248812487 | 6.827978976 | 1.020929532 | Sorcs1        |
| ENSMUSG00000050395 | 0.185695069  | -2.428992592 | 1.44E-05 | 6.33E-05 | 34.9005694 | 63.5911412 | 39.6450583 |  | 4.142178564 | 11.09546584 | 10.20929532 | Trnfs15       |
| ENSMUSG00000059974 | 0.351058425  | -1.510216944 | 1.44E-05 | 6.34E-05 | 65.3267069 | 72.3960684 | 89.2013812 |  | 33.13742851 | 23.04442904 | 23.48137923 | Ntm           |
| ENSMUSG00000038457 | 0.431242892  | -1.213427416 | 1.45E-05 | 6.36E-05 | 276.519896 | 238.711361 | 149.907877 |  | 95.27010697 | 90.47072143 | 102.0929532 | Tmem255b      |
| ENSMUSG00000055093 | 3.945932948  | 1.980366441  | 1.46E-05 | 6.43E-05 | 10.7386367 | 30.3280827 | 30.9727018 |  | 107.6966427 | 104.1266794 | 69.42320814 | Gm8430        |
| ENSMUSG00000080850 | 0.005916447  | -7.401053113 | 1.47E-05 | 6.45E-05 | 1.78977279 | 63.5911412 | 24.7781615 |  | 0           | 0           | 0           | Gm12439       |
| ENSMUSG00000087090 | 0.030219093  | -5.048395818 | 1.48E-05 | 6.49E-05 | 51.0085245 | 546.883814 | 111.501727 |  | 13.46208033 | 5.974481604 | 2.041859063 | Nctc1         |
| ENSMUSG00000024511 | 2.587884715  | 1.37177335   | 1.49E-05 | 6.53E-05 | 315.894898 | 282.735997 | 130.085348 |  | 646.179856  | 522.3403916 | 722.8181083 | Rab27b        |
| ENSMUSG00000020178 | 0.470675251  | -1.0871961   | 1.50E-05 | 6.58E-05 | 134.232959 | 164.358642 | 190.791843 |  | 80.772482   | 65.71929764 | 83.71622159 | Adora2a       |
| ENSMUSG00000027249 | 885.0606385  | 9.789632492  | 1.50E-05 | 6.58E-05 | 0          | 0.97832525 | 0          |  | 296.1657673 | 3.413989488 | 677.8972089 | F2            |
| ENSMUSG00000021213 | 0.241494553  | -2.049937446 | 1.51E-05 | 6.64E-05 | 48.3238654 | 67.5044422 | 104.068278 |  | 19.67534818 | 11.09546584 | 22.46044969 | Akr1c13       |
| ENSMUSG00000021710 | 0.495864326  | -1.011982658 | 1.52E-05 | 6.67E-05 | 553.934679 | 371.763594 | 338.221904 |  | 214.3577407 | 191.1834113 | 222.5626379 | Nln           |
| ENSMUSG00000097357 | 3.893373789  | 1.961020859  | 1.54E-05 | 6.75E-05 | 18.7926143 | 8.80492724 | 12.3890807 |  | 60.06158918 | 46.94235546 | 50.02554704 | Gm16793       |
| ENSMUSG00000109783 | 0.0932446    | -3.422836015 | 1.56E-05 | 6.83E-05 | 25.9517055 | 25.4364565 | 21.0614372 |  | 1.035544641 | 1.706994744 | 4.083718126 | Gm45338       |
| ENSMUSG00000045991 | 36.85163667  | 5.203656789  | 1.56E-05 | 6.84E-05 | 0.8948864  | 2.93497575 | 2.47781615 |  | 47.63505349 | 2.560492116 | 179.6835971 | Onecut2       |
| ENSMUSG00000025804 | 0.342193991  | -1.547113668 | 1.59E-05 | 6.96E-05 | 135.127846 | 234.79806  | 265.126328 |  | 96.30565161 | 71.69377925 | 49.00461751 | Ccr1          |
| ENSMUSG00000051747 | 0.020629816  | -5.59912522  | 1.61E-05 | 7.03E-05 | 201.191326 | 33021.4121 | 3550.71054 |  | 498.0969723 | 105.8336741 | 193.976611  | Ttn           |
| ENSMUSG0000011361  | 0.230982929  | -2.114141865 | 1.62E-05 | 7.08E-05 | 79.644882  | 238.711361 | 361.761157 |  | 50.74168741 | 46.94235546 | 59.21391283 | Gm47445       |
| ENSMUSG00000038910 | 0.375259014  | -1.414041367 | 1.62E-05 | 7.09E-05 | 328.423307 | 849.186316 | 734.672487 |  | 238.1752674 | 221.9093167 | 257.2742419 | Plcl2         |
| ENSMUSG00000031891 | 0.096875885  | -3.367718605 | 1.63E-05 | 7.12E-05 | 40.2698878 | 24.4581312 | 47.0785068 |  | 8.284357128 | 1.706994744 | 1.020929532 | Hsd11b2       |
| ENSMUSG00000050440 | 105.2630807  | 6.717855713  | 1.64E-05 | 7.15E-05 | 0.8948864  | 0          | 1.23890807 |  | 57.9904999  | 0.853497372 | 159.2650069 | Hamp          |
| ENSMUSG00000015879 | 8.279197322  | 3.049490903  | 1.65E-05 | 7.18E-05 | 5.36931837 | 2.93497575 | 2.47781615 |  | 21.74643746 | 42.6748686  | 26.54416782 | Fam184b       |
| ENSMUSG00000048534 | 0.242181054  | -2.045842088 | 1.65E-05 | 7.18E-05 | 68.965254  | 134.030559 | 112.740635 |  | 42.45733028 | 17.92344481 | 16.3348725  | Jam1          |
| ENSMUSG00000057777 | 0.173465843  | -2.527276483 | 1.65E-05 | 7.19E-05 | 29.531251  | 26.4147817 | 33.450518  |  | 5.177723205 | 4.26748686  | 6.125577189 | Mab2112       |
| ENSMUSG00000038473 | 2.356439278  | 1.236608506  | 1.66E-05 | 7.22E-05 | 85.909094  | 71.4177432 | 49.5563229 |  | 167.7582318 | 186.9159245 | 135.7836277 | Nos1ap        |
| ENSMUSG00000052316 | 0.046420379  | -4.429097883 | 1.66E-05 | 7.24E-05 | 201.349439 | 208.383728 | 1232.71353 |  | 42.45733028 | 25.60492116 | 8.167436252 | Lrrc15        |
| ENSMUSG00000033705 | 0.429834675  | -1.218146223 | 1.67E-05 | 7.27E-05 | 1975.01427 | 1140.72724 | 869.713467 |  | 551.9452937 | 592.3271761 | 569.6786786 | Stard9        |
| ENSMUSG00000078616 | 0.058144799  | -4.104206045 | 1.68E-05 | 7.30E-05 | 15.2130687 | 24.4581312 | 27.2559776 |  | 2.071089282 | 0.853497372 | 1.020929532 | Trim30c       |
| ENSMUSG00000099250 | 58.61289564  | 5.873146207  | 1.68E-05 | 7.33E-05 | 0          | 0          | 1.23890807 |  | 24.85307138 | 14.50945532 | 25.52323829 | Rnf7s2        |
| ENSMUSG00000049420 | 0.236747323  | -2.078579982 | 1.69E-05 | 7.36E-05 | 59.9573885 | 68.4827674 | 37.1672422 |  | 8.284357128 | 13.65595795 | 17.35580204 | Tmem200a      |
| ENSMUSG00000021714 | 0.271076638  | 1.465230933  | 1.72E-05 | 7.46E-05 | 22.3721599 | 39.1330099 | 42.1288745 |  | 101.4833748 | 97.2987004  | 84.73715112 | Cenpk         |
| ENSMUSG00000018486 | 0.306655825  | -1.705307738 | 1.74E-05 | 7.57E-05 | 67.1164797 | 92.9408986 | 68.139944  |  | 30.03079459 | 25.60492116 | 14.29301344 | Wnt9b         |
| ENSMUSG00000044217 | 0.107761162  | -3.214090782 | 1.75E-05 | 7.60E-05 | 17.8977279 | 28.3714322 | 52.0341391 |  | 4.142178564 | 4.26748686  | 2.041859063 | Aqp5          |
| ENSMUSG00000072199 | 0.230172991  | -2.119205939 | 1.82E-05 | 7.89E-05 | 34.9005694 | 84.1359714 | 71.8566682 |  | 12.42653569 | 17.92344818 | 13.27208391 | AS30040E14R1k |
| ENSMUSG00000041660 | 15.476623252 | 3.952019692  | 1.83E-05 | 7.92E-05 | 1.78977279 | 1.9566505  | 2.47781615 |  | 21.74643746 | 14.50945532 | 59.21391283 | Bbox1         |
| ENSMUSG00000024245 | 0.153922697  | -2.097722116 | 1.84E-05 | 7.98E-05 | 22.3721599 | 36.1980342 | 29.7337937 |  | 5.177723205 | 3.413989488 | 5.104647658 | Tmem178       |
| ENSMUSG00000045062 | 0.358873057  | -1.47845448  | 1.86E-05 | 8.07E-05 | 80.5397756 | 67.5044422 | 68.139944  |  | 32.10188387 | 20.48393693 | 25.52323829 | Pcdh7         |
| ENSMUSG00000051515 | 0.179267845  | -2.479811359 | 1.87E-05 | 8.08E-05 | 25.0568191 | 39.1330099 | 37.1672422 |  | 4.142178564 | 7.681476348 | 6.125577189 | Fam181b       |
| ENSMUSG00000006715 | 0.453706434  | -1.140168976 | 1.88E-05 | 8.11E-05 | 92.1732987 | 121.312331 | 113.979543 |  | 49.70614277 | 48.6493502  | 50.02554704 | Gmn           |
| ENSMUSG00000033531 | 28.727907    | 7.656659327  | 1.89E-05 | 8.18E-05 | 0          | 0          | 0          |  | 24.85307138 | 0.853497372 | 88.82086924 | Acsn1         |
| ENSMUSG00000109674 | 0.283604107  | -1.81804967  | 1.90E-05 | 8.21E-05 | 58.1676157 | 42.0679857 | 49.5563229 |  | 17.6042589  | 12.25115438 | 12.25115438 | Gm45470       |
| ENSMUSG00000020598 | 0.219342282  | -2.188744154 | 1.91E-05 | 8.26E-05 | 46.5340926 | 55.7645392 | 37.1672422 |  | 5.177723205 | 11.09546584 | 14.29301344 | Nrcam         |
| ENSMUSG00000026955 | 0.052270557  | -4.257857662 | 1.93E-05 | 8.32E-05 | 13.4232959 | 30.3280827 | 29.7337937 |  | 2.071089282 | 1.706994744 | 0           | Sapcd2        |
| ENSMUSG0000007908  | 0.298150252  | -1.745888539 | 1.94E-05 | 8.34E-05 | 51.9034109 | 50.8729129 | 45.8395687 |  | 12.42653569 | 13.65595795 | 18.37673157 | Hmgcl1        |
| ENSMUSG00000020067 | 0.019596824  | -5.673236299 | 1.94E-05 | 8.38E-05 | 68.965254  | 897.124253 | 116.457359 |  | 15.53316962 | 1.706994744 | 4.083718126 | Myrn          |
| ENSMUSG00000082902 | 0.280647153  | -1.833170668 | 1.96E-05 | 8.44E-05 | 38.480115  | 51.8512382 | 47.0785068 |  | 13.46208033 | 12.80246058 | 12.25115438 | Ccl19-ps1     |
| ENSMUSG00000034570 | 3.098581952  | 1.631608125  | 1.98E-05 | 8.52E-05 | 20.5823871 | 17.6098545 | 27.2559776 |  | 53.84832133 | 66.57279501 | 80.65343299 | Inpp5j        |
| ENSMUSG00000027360 | 0.345134357  | -1.534769998 | 1.99E-05 | 8.55E-05 | 172.713074 | 472.531095 | 298.576846 |  | 104.5900087 | 100.7126899 | 120.4696847 | Hdc           |
| ENSMUSG00000073002 | 0.473759776  | -2.077772381 | 1.99E-05 | 8.55E-05 | 468.025585 | 792.443451 | 893.25772  |  | 324.1254726 | 321.7685092 | 373.6602085 | Vamp5         |
| ENSMUSG00000050014 | 0.291069925  | -1.780562314 | 1.99E-05 | 8.57E-05 | 63.5369341 | 158.48869  | 133.802072 |  | 37.27960708 | 38.40738174 | 27.56509735 | Apo10b        |
| ENSMUSG00000086507 | 0.084720121  | -3.561151541 | 2.01E-05 | 8.64E-05 | 21.4772735 | 34.2413837 | 38.4061503 |  | 5.177723205 | 0           | 3.062788595 | Adap2os       |
| ENSMUSG00000035686 | 0.417643111  | -1.260275227 | 2.04E-05 | 8.78E-05 | 5007.78427 | 2076.00618 | 3523.45456 |  | 1728.324006 | 1195.749818 | 1504.850129 | Thrs          |
| ENSMUSG00000058755 | 0.206084889  | -2.278689367 | 2.04E-05 | 8.78E-05 | 29.531251  | 75.3310441 | 55.708633  |  | 12.42653569 | 8.53497372  | 12.25115438 | Osm           |
| ENSMUSG00000009214 | 0.016798452  | -5.89552786  | 2.05E-05 | 8.80E-05 | 6.26420477 | 46.9596119 | 64.4232198 |  | 2.071089282 | 0           | 0           | Myrk          |
| ENSMUSG00000070424 | 0.086604411  | -3.529415681 | 2.05E-05 | 8.80E-05 | 23.2670463 | 85.1142966 | 30.9727018 |  | 3.106633923 | 7.681476348 | 1.020929532 | Art5          |
| ENSMUSG00000034156 | 0.139498486  | -2.841678629 | 2.06E-05 | 8.85E-05 | 25.9517055 | 32.2847332 | 29.7337937 |  | 2.071089282 | 6.827978976 | 3.062788595 | Tspoap1       |
| ENSMUSG00000079428 | 0.045112537  | -4.470327767 | 2.08E-05 | 8.93E-05 | 6.26420477 | 135.98717  | 79.2901166 |  | 7.248812487 | 0.853497372 | 2.041859063 | Pscap1        |
| ENSMUSG00000029206 | 0.183389888  | -2.447014    | 2.13E-05 | 9.12E-05 | 42.954547  | 30.3280827 | 49.5563229 |  | 6.213267846 | 4.26748686  | 12.25115438 | Nsun7         |
| ENSMUSG00000022629 | 0.363810555  | -1.458740697 | 2.14E-05 | 9.18E-05 | 126.178982 | 186.860122 | 199.4642   |  | 61.09713382 | 40.96787385 | 84.73715112 | Kif21a        |
| ENSMUSG00000075286 | 57.64330676  | 5.849081194  | 2.16E-05 | 9.23E-05 | 0          | 0.97832525 | 0          |  | 19.67534818 | 14.50945532 | 29.60695641 | Gm1968        |
| ENSMUSG00000064344 | 2.796912667  | 1.483835207  | 2.16E-05 | 9.24E-05 | 23.2670463 | 30.3280827 | 32.2116099 |  | 99.41228554 | 69.13328713 | 70.44413768 | mt-Tm         |
| ENSMUSG00000068240 | 2.914133009  | 1.547119513  | 2.19E-05 | 9.34E-05 | 36.6903422 | 33.2630585 | 40.8839616 |  | 125.3009016 | 128.8781032 | 67.38134908 | Gm11808       |
| ENSMUSG00000051124 | 0.484367035  | -1.045827414 | 2.23E-05 | 9.51E-05 | 107.386367 | 124.247307 | 107.785002 |  | 52.81277669 | 55.47732918 | 56.15112423 | Gimap9        |
| ENSMUSG00000027513 | 0.411315965  | -1.213705925 | 2.26E-05 | 9.64E-05 | 3334.34671 | 2407.65844 | 4336.17825 |  | 1701.399845 | 920.070167  | 1724.349979 | Pck1          |
| ENSMUSG00000046207 | 0.459008514  | -1.123407181 | 2.28E-05 | 9.72E-05 | 160.184665 | 268.061118 | 266.414251 |  | 104.5900087 | 104.9801768 | 109.2394599 | Pik3r6        |
| ENSMUSG00000024617 | 0.077346099  | -3.692527655 | 2.30E-05 | 9.81E-05 | 157.500006 | 1248.34302 | 294.860121 |  |             |             |             |               |

|                     |             |              |          |            |            |            |            |             |             |             |               |
|---------------------|-------------|--------------|----------|------------|------------|------------|------------|-------------|-------------|-------------|---------------|
| ENSMUSG00000040181  | 0.407108563 | -1.296514528 | 2.66E-05 | 0.00011232 | 5738.01157 | 3047.48315 | 2467.90488 | 1904.366595 | 1241.838676 | 1436.447851 | Fmo1          |
| ENSMUSG0000003552   | 2.200943115 | 1.138121858  | 2.67E-05 | 0.00011239 | 142.286937 | 76.3093694 | 117.696267 | 229.8909103 | 232.1512852 | 278.7137621 | Ebf4          |
| ENSMUSG00000025089  | 0.330236744 | -1.598427443 | 2.69E-05 | 0.00011337 | 168.238642 | 131.095583 | 113.979543 | 44.52841956 | 26.45841853 | 66.36041955 | Gfra1         |
| ENSMUSG00000030854  | 0.049244416 | -4.343896062 | 2.69E-05 | 0.00011337 | 12.5284095 | 18.5881797 | 47.0785068 | 1.035544641 | 1.706994744 | 1.020929532 | Ptpn5         |
| ENSMUSG00000038932  | 0.072235306 | -3.791152038 | 2.73E-05 | 0.000115   | 29.531251  | 12.7182282 | 53.2730471 | 2.071089282 | 0.853497372 | 4.083718126 | Tcf15         |
| ENSMUSG000000103593 | 2.470978132 | 3.50082243   | 2.75E-05 | 0.00011572 | 102.017049 | 63.5911412 | 52.0341391 | 211.2511068 | 157.8971038 | 172.5370908 | Gm37352       |
| ENSMUSG00000051805  | 3.290309544 | 1.718223315  | 2.81E-05 | 0.00011799 | 16.1079551 | 18.5881797 | 11.1501727 | 48.67059813 | 54.62383181 | 49.00461751 | A530095I07Rik |
| ENSMUSG00000030747  | 0.40144866  | -1.316712598 | 2.85E-05 | 0.00011953 | 3804.16207 | 1636.73814 | 2199.06183 | 1310.999516 | 774.9756137 | 982.1342093 | Dgat2         |
| ENSMUSG000000104835 | 0.099775816 | -3.325166016 | 2.86E-05 | 0.00012018 | 15.2130687 | 33.2630585 | 29.7337937 | 4.142178564 | 1.706994744 | 2.041859063 | Gm5547        |
| ENSMUSG00000032855  | 2.423743801 | 1.277237209  | 2.88E-05 | 0.00012066 | 6140.71045 | 3494.57779 | 2291.97993 | 10360.62413 | 9636.838827 | 8916.798528 | Pkd1          |
| ENSMUSG000000448856 | 2.640603552 | 1.400867718  | 2.91E-05 | 0.00011288 | 47.428979  | 45.9812867 | 50.795231  | 152.2250622 | 81.93574771 | 147.0138525 | Slc25a47      |
| ENSMUSG00000050505  | 0.109485095 | -3.191193614 | 2.91E-05 | 0.00012188 | 68.0113661 | 47.9379372 | 113.979543 | 19.67534818 | 1.706994744 | 4.083718126 | Pcdh20        |
| ENSMUSG00000091952  | 3.179697853 | 1.668889681  | 2.94E-05 | 0.00012306 | 24.1619327 | 14.6748787 | 14.8668969 | 53.84832133 | 62.30530815 | 56.15112423 | Gm17709       |
| ENSMUSG00000061462  | 0.029588508 | -5.078819252 | 2.96E-05 | 0.00012384 | 327.528421 | 4354.52568 | 556.29725  | 99.41228554 | 17.92344481 | 37.77439267 | Obscn         |
| ENSMUSG00000028713  | 0.499391993 | -1.001755404 | 2.97E-05 | 0.00012412 | 622.840931 | 450.029614 | 356.805525 | 257.8506156 | 211.6673482 | 246.0440171 | Cyp4b1        |
| ENSMUSG00000043969  | 0.026333325 | -5.246966472 | 3.02E-05 | 0.00012605 | 11.6335231 | 24.4581312 | 37.1672422 | 1.035544641 | 0.853497372 | 0           | Emx2          |
| ENSMUSG00000042340  | 2.381010595 | 1.25157404   | 3.12E-05 | 0.00013007 | 41.1647742 | 79.2443451 | 63.1843117 | 136.6918926 | 157.0435164 | 141.9092049 | Ctf1          |
| ENSMUSG00000025190  | 0.380557531 | -1.37685083  | 3.15E-05 | 0.00013135 | 385.696036 | 972.455297 | 579.808978 | 220.5710085 | 223.6163115 | 302.1951413 | G001          |
| ENSMUSG00000096965  | 0.043691337 | -4.51650895  | 3.18E-05 | 0.00013262 | 16.1079551 | 14.6748787 | 35.9283341 | 1.035544641 | 0.853497372 | 1.020929532 | B300005D01Rik |
| ENSMUSG00000090124  | 0.177347057 | -2.495352709 | 3.22E-05 | 0.00013426 | 98.4375035 | 56.7428644 | 30.9727018 | 8.284357128 | 7.681476348 | 17.35580204 | Ugt1a7c       |
| ENSMUSG00000068101  | 0.20511746  | -2.28547779  | 3.24E-05 | 0.0001351  | 33.1107966 | 49.8945877 | 63.1843117 | 5.177723205 | 9.388471092 | 15.31394297 | Cenpm         |
| ENSMUSG00000051243  | 0.372542811 | -1.424521871 | 3.24E-05 | 0.00013514 | 150.340914 | 157.510365 | 289.904489 | 88.02129449 | 76.81476348 | 57.17205377 | Islr2         |
| ENSMUSG00000002500  | 0.028200408 | -5.148140138 | 3.26E-05 | 0.00013585 | 71.5909116 | 1416.61496 | 175.924946 | 26.92416067 | 6.827978976 | 13.27208391 | Rpl3l         |
| ENSMUSG00000041912  | 0.332778561 | -1.589534884 | 3.26E-05 | 0.00013585 | 65.3267069 | 53.8078887 | 48.3174148 | 20.71089282 | 18.77694218 | 16.3348725  | Trdkh         |
| ENSMUSG00000057716  | 0.255066795 | -1.971052994 | 3.30E-05 | 0.00013714 | 52.7982973 | 32.2847332 | 43.3617825 | 10.35544641 | 10.24196846 | 12.25115438 | Tmem178b      |
| ENSMUSG00000000049  | 70.84596738 | 6.146613831  | 3.30E-05 | 0.00013727 | 1.78977279 | 2.93497575 | 3.71672422 | 162.5805086 | 4.26748686  | 426.7485442 | Apoh3         |
| ENSMUSG00000071860  | 34.56641079 | 5.111298904  | 3.31E-05 | 0.00013752 | 0          | 1.9566505  | 0          | 16.56871426 | 29.87240802 | 23.48137923 | G00005J20Rik  |
| ENSMUSG00000094088  | 0.091320076 | -3.452924126 | 3.33E-05 | 0.00013852 | 18.7926143 | 57.7211897 | 18.5836211 | 4.142178564 | 2.560492164 | 2.041859063 | Ighv1-64      |
| ENSMUSG00000050232  | 0.214690575 | -2.219669239 | 3.36E-05 | 0.00013943 | 43.8494334 | 76.3093694 | 38.4061503 | 6.213267846 | 15.3629527  | 12.25115438 | Cxcr3         |
| ENSMUSG00000079445  | 0.14922225  | -2.744654331 | 3.37E-05 | 0.00013967 | 18.7926143 | 31.306408  | 47.0785068 | 4.142178564 | 5.120984232 | 5.104647658 | B3gnt7        |
| ENSMUSG00000030000  | 2.912957175 | 1.542484492  | 3.38E-05 | 0.00014028 | 28.6363647 | 30.3280827 | 33.450518  | 61.09713382 | 87.91029931 | 119.4487552 | Add2          |
| ENSMUSG00000074912  | 0.177409926 | -2.494841369 | 3.44E-05 | 0.00014247 | 46.5340926 | 34.2413837 | 53.2730471 | 2.071089282 | 10.24196846 | 11.23022485 | Gm14207       |
| ENSMUSG00000026222  | 0.224767317 | -2.153495825 | 3.44E-05 | 0.0001425  | 38.480115  | 37.1763594 | 32.2116099 | 11.39099105 | 5.974481604 | 7.146506721 | Acr           |
| ENSMUSG00000073491  | 0.250209276 | -1.998792821 | 3.44E-05 | 0.0001425  | 92.1732987 | 367.850293 | 252.737247 | 46.59950885 | 80.22875297 | 51.04647658 | Ifi213        |
| ENSMUSG00000006435  | 0.179734386 | -2.476061651 | 3.45E-05 | 0.00014278 | 87.6988667 | 638.846387 | 211.85328  | 46.59950885 | 88.6493502  | 73.50692627 | Nfeur1a       |
| ENSMUSG00000031385  | 0.228746613 | -2.128177711 | 3.47E-05 | 0.00014357 | 76.96023   | 69.4610927 | 30.9727018 | 17.6042589  | 11.09546584 | 12.25115438 | Plnb3         |
| ENSMUSG00000019936  | 0.167911936 | -2.574223286 | 3.49E-05 | 0.00014429 | 45.6392062 | 24.4581312 | 27.2559776 | 7.248812487 | 5.120984232 | 4.083718126 | Epyc          |
| ENSMUSG00000056531  | 2.769484274 | 1.469617347  | 3.50E-05 | 0.00014471 | 27.7414783 | 34.2413837 | 58.2286794 | 127.3719908 | 100.7126899 | 101.0720236 | Ccdc18        |
| ENSMUSG00000109498  | 3.575254081 | 1.838045773  | 3.53E-05 | 0.00014599 | 18.7926143 | 13.6965535 | 18.2252592 | 82.84357128 | 41.82137123 | 62.27670142 | Gm55222       |
| ENSMUSG00000075707  | 0.058317293 | -4.099932445 | 3.53E-05 | 0.00014612 | 16.1079551 | 26.4147817 | 22.3003453 | 1.035544641 | 2.560492116 | 0           | Dio3          |
| ENSMUSG00000069305  | 23.77428372 | 4.57132997   | 3.56E-05 | 0.00014719 | 1.78977279 | 0.97832525 | 0          | 14.49762497 | 18.77694218 | 37.77439267 | Hist1h4n      |
| ENSMUSG00000050207  | 0.034776749 | -4.845733125 | 3.57E-05 | 0.00014737 | 124.389299 | 1811.85836 | 201.942016 | 39.35069636 | 13.65595795 | 21.43952016 | Smyd1         |
| ENSMUSG00000021025  | 0.461762452 | -1.114777229 | 3.57E-05 | 0.00014738 | 2305.22735 | 4294.84784 | 5015.09988 | 1669.297961 | 2066.317138 | 1626.340744 | Nfkb1a        |
| ENSMUSG00000041729  | 0.442777399 | -1.17354651  | 3.57E-05 | 0.00014747 | 306.946034 | 195.66505  | 339.460812 | 135.656348  | 95.59170566 | 141.9092049 | Coro2b        |
| ENSMUSG00000049036  | 0.160229768 | -2.641785889 | 3.59E-05 | 0.00014821 | 34.9005694 | 25.4364565 | 23.5925234 | 3.106633923 | 4.26748686  | 6.125577189 | Memt121       |
| ENSMUSG00000034551  | 0.241054633 | -2.052567936 | 3.60E-05 | 0.00014836 | 56.3778429 | 31.306408  | 44.6006906 | 13.46208033 | 9.388471092 | 9.188365784 | Hdx           |
| ENSMUSG000000105128 | 41.80916359 | 5.385747277  | 3.60E-05 | 0.0001484  | 0          | 1.9566505  | 0          | 19.67534818 | 50.35634495 | 14.29301344 | Gm42870       |
| ENSMUSG00000057400  | 371.1434786 | 8.535833209  | 3.63E-05 | 0.00014966 | 0          | 0.97832525 | 1.23890807 | 225.7487317 | 1.706994744 | 569.6786786 | Ces1c         |
| ENSMUSG00000002835  | 0.424943987 | -1.234655406 | 3.67E-05 | 0.00015122 | 91.2784123 | 136.965535 | 123.890807 | 40.386241   | 54.62383181 | 54.10926517 | Chaf1a        |
| ENSMUSG00000037577  | 0.237852589 | -2.07185538  | 3.72E-05 | 0.00015299 | 54.5880701 | 54.7862139 | 33.450518  | 10.35544641 | 7.681476348 | 16.3348725  | Ephx3         |
| ENSMUSG00000074968  | 0.147635984 | -2.759883693 | 3.72E-05 | 0.00015295 | 49.2187517 | 19.566505  | 28.4948857 | 5.177723205 | 5.120984232 | 4.083718126 | Ano3          |
| ENSMUSG00000052861  | 0.208798276 | -2.259818292 | 3.72E-05 | 0.00015296 | 28.6363647 | 31.306408  | 32.2116099 | 7.248812487 | 6.827978976 | 5.104647658 | Dnah6         |
| ENSMUSG00000074497  | 0.349037885 | -2.120696276 | 3.72E-05 | 0.00015301 | 12.5284095 | 9.78325249 | 6.19454036 | 35.20851779 | 53.77033443 | 36.75346313 | G00007G23Rik  |
| ENSMUSG00000062044  | 2.531482004 | 1.339882228  | 3.74E-05 | 0.00015337 | 43.8494334 | 28.3714322 | 34.689426  | 80.772482   | 83.64274245 | 107.1976008 | Lmtk3         |
| ENSMUSG00000021087  | 0.413909585 | -1.272612436 | 3.76E-05 | 0.00015435 | 75.1704572 | 96.8541996 | 102.82937  | 42.45733028 | 31.57940276 | 39.81625173 | Rtn1          |
| ENSMUSG00000070639  | 0.498264619 | -1.005015961 | 3.77E-05 | 0.0001548  | 280.994328 | 242.624662 | 226.720177 | 124.2653569 | 94.73820829 | 156.2022183 | Lrrc8b        |
| ENSMUSG00000029086  | 0.238907233 | -2.065477565 | 3.78E-05 | 0.00015513 | 40.2698878 | 34.2413837 | 38.4061503 | 6.213267846 | 8.53497372  | 12.25115438 | Prom1         |
| ENSMUSG000000109812 | 0.326616476 | -1.614330525 | 3.79E-05 | 0.00015534 | 202.244325 | 368.828619 | 646.710014 | 108.7321873 | 149.3620401 | 138.8464163 | Gm45640       |
| ENSMUSG00000020017  | 19.93724181 | 4.317393931  | 3.79E-05 | 0.00015534 | 5.36931837 | 2.93497575 | 66.7235651 | 93.19901769 | 34.13989488 | 238.8975104 | Hlx           |
| ENSMUSG00000003233  | 2.103760509 | 1.072970478  | 3.89E-05 | 0.00015935 | 25.52559   | 379.590196 | 302.29357  | 899.888293  | 929.4586381 | 925.9830851 | Dvl3          |
| ENSMUSG00000029638  | 2.482085604 | 1.311552873  | 3.95E-05 | 0.00016173 | 36.6903422 | 32.2847332 | 34.689426  | 86.98574985 | 101.5661873 | 68.40227861 | Glicc1        |
| ENSMUSG00000021303  | 0.290197012 | -1.784895428 | 3.97E-05 | 0.00016241 | 54.5880701 | 56.7428644 | 59.1570135 | 26.92416067 | 15.3629527  | 17.35580204 | Gng4          |
| ENSMUSG00000023903  | 0.095192644 | -3.393006096 | 3.97E-05 | 0.00016269 | 16.1079551 | 53.8078887 | 22.3003453 | 4.142178564 | 1.706994744 | 3.062788595 | Mmp25         |
| ENSMUSG00000022883  | 0.293633426 | -1.767911886 | 4.01E-05 | 0.00016406 | 170.923302 | 61.6344907 | 126.368623 | 28.99524995 | 37.55388437 | 38.7953222  | Robo1         |
| ENSMUSG000000104524 | 0.232050976 | -2.10748633  | 4.04E-05 | 0.00016504 | 67.1164797 | 163.380317 | 267.604144 | 24.85307138 | 50.35634495 | 39.81625173 | Gm37333       |
| ENSMUSG00000034755  | 3.456635077 | 1.789368304  | 4.05E-05 | 0.00016553 | 11.6335231 | 11.739903  | 19.8225292 | 52.81277669 | 51.20984232 | 42.87904032 | Pcdh11x       |
| ENSMUSG00000095385  | 0.101561294 | -3.299577407 | 4.06E-05 | 0.00016612 | 18.7926143 | 24.4581312 | 22.3003453 | 1.035544641 | 34.1398     |             |               |

|                     |             |              |          |             |             |            |             |             |               |             |               |
|---------------------|-------------|--------------|----------|-------------|-------------|------------|-------------|-------------|---------------|-------------|---------------|
| ENSMUSG00000072653  | 0.40785313  | -1.293878372 | 4.85E-05 | 0.00019513  | 203.139212  | 123.268981 | 128.84644   | 47.63505349 | 71.69377925   | 66.36041955 | Zfp783        |
| ENSMUSG00000098661  | 3.264168455 | 1.706715513  | 4.85E-05 | 0.00019519  | 11.6335231  | 16.6315292 | 16.1058049  | 41.42178564 | 50.35634495   | 52.06740611 | Mir7052       |
| ENSMUSG00000038077  | 0.470074412 | -1.089038943 | 4.87E-05 | 0.00019571  | 170.028415  | 119.35568  | 161.058049  | 75.59475879 | 58.03782129   | 78.61157393 | Kcna6         |
| ENSMUSG00000043051  | 0.248653122 | -0.200779359 | 4.89E-05 | 0.00019648  | 42.955447   | 33.2630585 | 40.8839664  | 7.681476348 | 13.46208033   | 8.167436252 | Disc1         |
| ENSMUSG00000034959  | 0.293119593 | -1.770438692 | 5.01E-05 | 0.00020117  | 43.8494334  | 67.5044222 | 74.3344844  | 18.63980354 | 23.04442904   | 12.25115438 | Rubcn1        |
| ENSMUSG00000061577  | 0.182777947 | -2.45183608  | 5.03E-05 | 0.00020202  | 39.3750014  | 82.1793209 | 69.3788521  | 15.53316962 | 3.413989488   | 16.3348725  | Adgrg5        |
| ENSMUSG00000024530  | 2.922545912 | 1.547225689  | 5.04E-05 | 0.00020214  | 34.005683   | 21.5231555 | 55.7508633  | 119.0876337 | 100.7126899   | 102.0929532 | Prelid3a      |
| ENSMUSG000000104871 | 2.56994257  | 1.36173612   | 5.07E-05 | 0.00020327  | 134.232959  | 271.974419 | 385.300411  | 637.8954989 | 635.8555421   | 755.4878533 | Gm42639       |
| ENSMUSG00000086541  | 0.285859595 | -1.806621377 | 5.08E-05 | 0.00020372  | 38.480115   | 40.1113352 | 39.6450583  | 11.39099105 | 10.1496846    | 12.25115438 | Has20s        |
| ENSMUSG00000057606  | 0.143932685 | -2.796533847 | 5.13E-05 | 0.00020533  | 17.8977279  | 54.7862139 | 35.9283341  | 7.248812487 | 3.413989488   | 5.104647658 | Colq          |
| ENSMUSG00000001670  | 673.3467541 | 9.395205832  | 5.14E-05 | 0.00020584  | 0           | 0.97832525 | 0           | 271.3126959 | 1.706994744   | 470.648514  | Tat           |
| ENSMUSG00000023959  | 0.360236266 | -1.472984668 | 5.14E-05 | 0.00020584  | 491.292631  | 897.124253 | 294.860121  | 192.6113032 | 193.7439034   | 220.5207788 | Clic5         |
| ENSMUSG00000036854  | 2.385649433 | 1.254382057  | 5.19E-05 | 0.00020744  | 809.872188  | 1856.86132 | 800.334615  | 2623.034576 | 2866.897672   | 2783.053903 | Hspb6         |
| ENSMUSG00000020216  | 0.033481118 | -4.900508504 | 5.20E-05 | 0.00020807  | 67.1164797  | 1319.76076 | 327.071731  | 34.17297315 | 5.974481604   | 17.35580204 | Jsrp1         |
| ENSMUSG00000025207  | 3.821134777 | 1.934001145  | 5.27E-05 | 0.00021043  | 35.7954558  | 38.1546847 | 54.5119552  | 143.9407051 | 75.10776873   | 270.5463259 | Sema4g        |
| ENSMUSG00000001930  | 0.495669572 | -1.012549396 | 5.27E-05 | 0.00021062  | 17383.1682  | 15815.606  | 8655.0118   | 7648.532719 | 5998.37953    | 7100.564892 | Vwf           |
| ENSMUSG000000026100 | 0.006863918 | -1.786751888 | 5.37E-05 | 0.00021435  | 5.36931837  | 68.4827674 | 3.71672422  | 0           | 0             | 0           | Mstn          |
| ENSMUSG00000082193  | 10.33941166 | 3.37008219   | 5.41E-05 | 0.00021581  | 0.8948864   | 2.93497575 | 2.47781615  | 24.85307138 | 19.63043956   | 19.3976611  | Rpl5-ps1      |
| ENSMUSG00000036390  | 2.246791771 | 1.167866424  | 5.46E-05 | 0.0002176   | 226.406258  | 435.354736 | 463.351619  | 706.2414452 | 774.9756137   | 1043.389981 | Gadd45a       |
| ENSMUSG00000079505  | 0.301845964 | -1.728115586 | 5.46E-05 | 0.00021772  | 44.7443198  | 96.8541996 | 80.5290247  | 23.81752674 | 18.77694218   | 24.50230876 | Gm1131        |
| ENSMUSG00000025813  | 0.411408668 | -1.281355904 | 5.46E-05 | 0.00021778  | 67.6988667  | 91.9625734 | 92.9181054  | 47.63505349 | 27.3119159    | 37.77439267 | Homer2        |
| ENSMUSG00000076555  | 0.024570168 | -5.346948462 | 5.47E-05 | 0.00021784  | 25.0568191  | 45.0029614 | 7.43344844  | 0           | 0.853497372   | 1.020929532 | Igkv4-57-1    |
| ENSMUSG00000093561  | 0.222504363 | -2.168094468 | 5.47E-05 | 0.00021784  | 34.005683   | 74.3527189 | 107.785002  | 19.67534818 | 11.09546584   | 17.35580204 | NA            |
| ENSMUSG00000103032  | 0.26602036  | -2.019743382 | 5.47E-05 | 0.00021801  | 30.4261374  | 41.0896604 | 49.5563229  | 11.39099105 | 11.09546584   | 7.146506721 | Gm37121       |
| ENSMUSG00000033831  | 2731.611705 | 11.41553671  | 5.54E-05 | 0.0002203   | 0           | 0          | 0           | 406.9690439 | 2.560492116   | 1139.357357 | Fgb           |
| ENSMUSG00000053219  | 0.217471414 | -2.201102317 | 5.59E-05 | 0.00022229  | 77.8551164  | 52.8295634 | 28.4948857  | 9.319901769 | 10.24196846   | 15.31394297 | Raet1e        |
| ENSMUSG00000027420  | 0.408323488 | -1.292215538 | 5.68E-05 | 0.000221965 | 102.911935  | 78.2660199 | 99.1126458  | 34.17297315 | 31.57940267   | 49.00461751 | Bfsp1         |
| ENSMUSG00000006930  | 0.350850677 | -1.511070948 | 5.70E-05 | 0.00022659  | 54.5880701  | 87.0709471 | 85.48465    | 24.85307138 | 22.19093167   | 32.66974501 | Hap1          |
| ENSMUSG00000015224  | 0.373134945 | -1.422230617 | 5.74E-05 | 0.00022728  | 150.340914  | 101.745826 | 92.9181054  | 58.82177669 | 29.87240802   | 46.96275845 | Cyp2j9        |
| ENSMUSG00000024036  | 3.028072592 | 1.598399791  | 5.77E-05 | 0.00022928  | 34.005683   | 59.6778402 | 30.9727018  | 80.772482   | 148.5085427   | 149.0557116 | Slc37a1       |
| ENSMUSG00000059481  | 378.4974049 | 8.564139599  | 5.79E-05 | 0.00022989  | 0.8948864   | 1.9566505  | 0           | 350.0140887 | 0.853497372   | 752.4250647 | Plg           |
| ENSMUSG00000109517  | 0.136412174 | -2.267395567 | 5.94E-05 | 0.00023554  | 24.1619327  | 23.479806  | 28.4948857  | 2.071089282 | 5.974481604   | 2.041859063 | Gm44763       |
| ENSMUSG00000060550  | 0.330030944 | -1.599326797 | 5.95E-05 | 0.00023608  | 835.823893  | 2607.23679 | 879.624732  | 479.4571688 | 521.4868943   | 425.7276146 | H2-Q7         |
| ENSMUSG00000022860  | 0.160307959 | -2.641082037 | 5.96E-05 | 0.00023645  | 39.3750014  | 31.306408  | 18.5836211  | 3.106633923 | 5.120984232   | 6.125577189 | Chodl         |
| ENSMUSG00000017740  | 0.288426553 | -1.793724106 | 6.02E-05 | 0.00023863  | 60.8522749  | 36.1980342 | 45.8395987  | 12.42653569 | 14.50945532   | 14.29301344 | Slc12a5       |
| ENSMUSG00000037542  | 49.72857037 | 5.636003051  | 6.05E-05 | 0.00023971  | 0.8948864   | 0          | 1.23890807  | 33.13742851 | 4.26748686    | 65.33949002 | Aldh8a1       |
| ENSMUSG00000046179  | 0.365238552 | -1.453089043 | 6.08E-05 | 0.000241    | 59.0625021  | 58.6995149 | 63.1843117  | 22.7819821  | 17.06994744   | 26.54416782 | E2f8          |
| ENSMUSG00000079168  | 0.32133746  | -1.637838921 | 6.18E-05 | 0.00024452  | 39.3750014  | 55.7645392 | 58.2286794  | 16.56871426 | 16.21645007   | 16.3348725  | Cd209g        |
| ENSMUSG00000054934  | 0.112959761 | -3.146119149 | 6.22E-05 | 0.00024606  | 31.3210238  | 16.6315292 | 39.6450583  | 4.142178564 | 0.853497372   | 5.104647658 | Kcnmb4        |
| ENSMUSG0000002032   | 3.023918161 | 1.596419095  | 6.25E-05 | 0.00024724  | 20.5823871  | 36.1980342 | 19.82255923 | 67.31040167 | 67.42629239   | 98.00923503 | Tmem25        |
| ENSMUSG00000057034  | 56.42738429 | 5.818323569  | 6.25E-05 | 0.00024739  | 1.78977279  | 0          | 0           | 30.3079459  | 5.120984232   | 75.54878533 | Ces1g         |
| ENSMUSG00000056130  | 0.205781785 | -2.28081281  | 6.28E-05 | 0.00024841  | 58.1676157  | 52.8295634 | 39.6450583  | 3.106633923 | 15.3629527    | 12.25115438 | Ticam2        |
| ENSMUSG00000048960  | 0.419279763 | -1.254014896 | 6.31E-05 | 0.00024938  | 1581.26426  | 1004.74003 | 620.692944  | 523.9855884 | 412.2392307   | 409.3927421 | Prex2         |
| ENSMUSG00000036931  | 0.407477666 | -1.295207107 | 6.32E-05 | 0.00024982  | 73.3806844  | 116.420705 | 87.9624732  | 38.31515172 | 40.96787385   | 33.69067454 | Nfkbid        |
| ENSMUSG00000009471  | 0.020641441 | -5.610948425 | 6.37E-05 | 0.00025177  | 5.36931837  | 68.4827674 | 22.3003452  | 1.035544641 | 0             | 1.020929532 | Myod1         |
| ENSMUSG00000020000  | 0.34437325  | -1.537955013 | 6.45E-05 | 0.00025463  | 89.4886395  | 68.4827674 | 65.6621278  | 26.92416067 | 17.06994744   | 33.69067454 | Moxd1         |
| ENSMUSG00000027474  | 0.478651788 | -1.062951596 | 6.52E-05 | 0.00025746  | 1034.48867  | 880.492724 | 515.385758  | 448.3908296 | 344.8129383   | 371.6183495 | Ccm2l         |
| ENSMUSG000000107390 | 0.174175071 | -2.521389943 | 6.62E-05 | 0.00026096  | 21.4772735  | 41.0896604 | 44.6006906  | 6.213267846 | 3.413989488   | 9.188365784 | Gm43323       |
| ENSMUSG00000035186  | 0.100228127 | -3.318640672 | 6.67E-05 | 0.00026307  | 15.2130687  | 131.095583 | 63.1843117  | 10.35544641 | 8.53497372    | 2.041859063 | Ubd           |
| ENSMUSG00000056145  | 2.372289441 | 1.246280422  | 6.78E-05 | 0.00026705  | 96.6477307  | 172.185244 | 107.785002  | 244.3885353 | 251.7817247   | 398.1625173 | Asp4432       |
| ENSMUSG00000074852  | 3.103956902 | 1.634108526  | 6.85E-05 | 0.0002696   | 68.9062524  | 57.7211897 | 22.3003453  | 167.7582318 | 120.3431294   | 178.662668  | Hpse2         |
| ENSMUSG00000074361  | 0.370535571 | -1.432316047 | 6.86E-05 | 0.00026995  | 100.227276  | 100.767501 | 137.518796  | 38.31515172 | 28.16541327   | 59.21391283 | CSar2         |
| ENSMUSG00000090908  | 0.123337633 | -3.019315031 | 6.88E-05 | 0.00027089  | 15.25023871 | 22.5014807 | 19.82255923 | 3.106633923 | 1.706994744   | 3.062788595 | Alms1-ps2     |
| ENSMUSG00000038765  | 0.082951452 | -3.591588951 | 6.91E-05 | 0.00027201  | 31.3210238  | 16.6315292 | 23.5392534  | 3.106633923 | 0             | 3.062788595 | Lmx1b         |
| ENSMUSG00000020173  | 2.35364763  | 1.234847552  | 6.93E-05 | 0.00027217  | 126.178982  | 265.126142 | 136.2798848 | 409.0401332 | 477.1050309   | 356.3044065 | Cobl          |
| ENSMUSG00000032942  | 0.334168604 | -1.581351901 | 7.04E-05 | 0.0002766   | 129.758527  | 274.909395 | 139.996612  | 50.74168741 | 46.94235546   | 84.73715112 | Ucp3          |
| ENSMUSG00000043448  | 0.304952244 | -1.713447763 | 7.09E-05 | 0.00027825  | 10.1136381  | 45.0029614 | 73.3344844  | 13.46208033 | 21.3374343    | 16.3348725  | Gjc2          |
| ENSMUSG00000043913  | 5.755822908 | 2.550222205  | 7.12E-05 | 0.00027939  | 17.0028415  | 1.9566505  | 23.5924584  | 75.59475879 | 94.73820829   | 71.46506712 | Ccdc60        |
| ENSMUSG00000031382  | 0.094728826 | -3.400052679 | 7.13E-05 | 0.0002796   | 25.9517055  | 242.624662 | 32.2116099  | 14.49762497 | 5.974481604   | 8.167436252 | Asb1          |
| ENSMUSG00000029556  | 111.375404  | 6.799286854  | 7.27E-05 | 0.00028454  | 0           | 0          | 0           | 22.7819821  | 1.706994744   | 38.7953222  | Hnf1a         |
| ENSMUSG00000070645  | 0.060508338 | -0.406722238 | 7.28E-05 | 0.0002849   | 98.4375035  | 21.5231555 | 8.67235651  | 4.142178564 | 1.706994744   | 2.041859063 | Ren1          |
| ENSMUSG00000072844  | 0.367735202 | -1.443260807 | 7.29E-05 | 0.00028507  | 93.9630715  | 68.4827674 | 118.935175  | 24.85307138 | 39.26087911   | 38.7953222  | G530011006Rik |
| ENSMUSG00000076934  | 0.199090782 | -2.328501669 | 7.28E-05 | 0.00028507  | 74.2755708  | 191.751749 | 55.508633   | 23.81752674 | 29.87240802   | 10.20929532 | Igfb1         |
| ENSMUSG00000038763  | 0.150728206 | -2.729978678 | 7.30E-05 | 0.00028548  | 59.9573885  | 442.203012 | 79.2901166  | 30.03079459 | 23.04442904   | 34.71160407 | Alpk3         |
| ENSMUSG00000097633  | 0.289493103 | -1.78839912  | 7.33E-05 | 0.00028668  | 42.0596606  | 38.1546847 | 60.7064956  | 12.42653569 | 11.94896321   | 16.3348725  | Gm16617       |
| ENSMUSG000000015058 | 2.311561928 | 1.208868014  | 7.40E-05 | 0.00028818  | 258.62168   | 576.233571 | 270.08196   | 824.2935343 | 880.8092879   | 850.4342998 | Sgc           |
| ENSMUSG00000029597  | 3.838401805 | 1.940505741  | 7.42E-05 | 0.00028995  | 17.0028415  | 12.7182282 | 74.3344844  | 39.35069636 | 43.52836597   | 62.27670142 | Sds           |
| ENSMUSG00000044365  | 2.243181176 | 1.165546148  | 7.49E-05 | 0.00029228  | 47.428979   | 36.1980342 | 53.0243191  | 117.0165444 | 89.61722406</ |             |               |

|                     |              |              |            |            |             |            |             |             |             |             |               |
|---------------------|--------------|--------------|------------|------------|-------------|------------|-------------|-------------|-------------|-------------|---------------|
| ENSMUSG00000018648  | 2.096094857  | 1.067704006  | 8.57E-05   | 0.00032992 | 61.7471613  | 95.8758744 | 110.262818  | 167.7582318 | 190.3299139 | 200.1021882 | Dusp14        |
| ENSMUSG00000026715  | 44.84230143  | 5.486788418  | 8.57E-05   | 0.00033008 | 8.05397756  | 4.89162624 | 14.8668969  | 337.587553  | 10.24196846 | 894.3342696 | Serpinc1      |
| ENSMUSG00000051504  | 0.211256778  | -2.242930463 | 8.60E-05   | 0.00033115 | 40.2698878  | 77.2876946 | 138.757704  | 15.53316962 | 11.09546584 | 27.56509735 | Siglech       |
| ENSMUSG00000028040  | 0.391138933  | -1.354246949 | 8.63E-05   | 0.00033023 | 84.1193212  | 58.6995149 | 95.39952196 | 28.99524995 | 34.13989488 | 29.60695641 | EfnA4         |
| ENSMUSG00000031698  | 5.803010567  | 2.536801556  | 8.63E-05   | 0.00033217 | 4.47443198  | 4.89162624 | 4.95563229  | 31.06633923 | 33.28639751 | 18.37673157 | Myrk3         |
| ENSMUSG00000024164  | 0.223127898  | -2.164057191 | 8.68E-05   | 0.00033392 | 20333.6087  | 17688.1205 | 13356.6679  | 3865.688145 | 1394.614706 | 6204.188763 | C3            |
| ENSMUSG00000033860  | 1267.298399  | 10.30754055  | 8.77E-05   | 0.00033655 | 1.78977279  | 0          | 0           | 623.3978739 | 0.853497372 | 1733.538345 | Fgg           |
| ENSMUSG00000079164  | 0.19410839   | -2.365065619 | 8.77E-05   | 0.00033655 | 90.3835259  | 44.0246362 | 49.5563298  | 19.67534818 | 4.26748686  | 12.25151438 | Tlr5          |
| ENSMUSG00000080115  | 0.238435883  | -2.068326727 | 8.81E-05   | 0.00033798 | 42.0596606  | 30.3280827 | 64.4232198  | 7.248812487 | 12.80246058 | 12.25151438 | Mett121b      |
| ENSMUSG00000050107  | 0.240186457  | -2.057773289 | 9.06E-05   | 0.00034694 | 35.7954558  | 45.0029614 | 29.7337937  | 8.284357128 | 11.94896321 | 6.125577189 | Haspin        |
| ENSMUSG00000079053  | 0.114525374  | -3.126260827 | 9.07E-05   | 0.00034766 | 13.42329549 | 44.0246362 | 37.1672422  | 6.213267846 | 1.706994754 | 3.062788595 | Gm14010       |
| ENSMUSG00000025128  | 0.168330068  | -2.570635195 | 9.18E-05   | 0.00035125 | 39.3750014  | 18.5881797 | 33.450518   | 3.106633923 | 5.120984232 | 7.146506721 | Bhlhe22       |
| ENSMUSG00000042357  | 0.202854193  | -2.301484973 | 9.19E-05   | 0.00035182 | 32.2159102  | 52.8295634 | 63.1843117  | 16.56871426 | 9.388471092 | 4.083718126 | Gjb5          |
| ENSMUSG00000025991  | 491.0383009  | 8.939691749  | 9.24E-05   | 0.00035335 | 1.78977279  | 3.91330099 | 1.23890807  | 870.8930431 | 0           | 2550.28197  | Cps1          |
| ENSMUSG00000037096  | 2.63533226   | 1.397984867  | 9.35E-05   | 0.00035738 | 21.4772735  | 20.5448302 | 21.0614372  | 57.9904999  | 57.18432392 | 51.04647658 | Gm9762        |
| ENSMUSG00000024268  | 0.300371333  | -1.73517232  | 9.36E-05   | 0.00035773 | 43.8494334  | 90.9842481 | 101.590462  | 28.99524995 | 20.48393693 | 21.43952016 | Celf4         |
| ENSMUSG000000107529 | 0.28914277   | -1.790146065 | 9.38E-05   | 0.0003585  | 44.7443198  | 70.4394179 | 112.740635  | 25.88861603 | 21.3374343  | 18.37673157 | Gm44291       |
| ENSMUSG00000050860  | 3.374394563  | 1.754628675  | 9.61E-05   | 0.00036706 | 32.2159102  | 66.5261169 | 20.0614372  | 132.5497141 | 100.7126899 | 173.5580204 | Phospho1      |
| ENSMUSG00000085925  | 0.134085895  | -2.898730775 | 9.69E-05   | 0.00036962 | 26.8465919  | 31.306408  | 50.4402893  | 11.39099105 | 2.560492116 | 6.125577189 | Rtl1          |
| ENSMUSG00000085862  | 4.755643219  | 2.249640484  | 9.80E-05   | 0.00037368 | 10.7386367  | 5.86995149 | 6.19454036  | 28.99524995 | 29.87240802 | 51.04647658 | Gm13483       |
| ENSMUSG00000030125  | 0.187630755  | -2.414031768 | 9.92E-05   | 0.00037798 | 34.9005694  | 22.5014807 | 28.4948857  | 4.142178564 | 7.681476348 | 4.083718126 | Lrrc23        |
| ENSMUSG00000030553  | 3.029261335  | 1.598966045  | 0.00010152 | 0.00038633 | 26.8465919  | 55.7645392 | 19.8225597  | 103.5544641 | 101.5661873 | 107.1976008 | Pgpep1l       |
| ENSMUSG00000100210  | 12.32032892  | 3.657677606  | 0.00010156 | 0.00038642 | 1.78977279  | 0.97832525 | 2.47781615  | 12.42653569 | 18.77694218 | 33.69067454 | Hist1h3f      |
| ENSMUSG00000014837  | 0.6362814631 | -1.572246625 | 0.00010164 | 0.00038766 | 56.3778429  | 47.9379372 | 45.8395987  | 16.56871426 | 20.48393693 | 13.27208391 | 4931428F04Rik |
| ENSMUSG00000028427  | 0.423643557  | -1.239077166 | 0.0001029  | 0.000391   | 182.556825  | 129.138933 | 263.887419  | 94.23456233 | 71.69377925 | 77.5906444  | Aqp7          |
| ENSMUSG00000046480  | 0.22663048   | -2.141586187 | 0.000104   | 0.00039472 | 186.13637   | 882.449374 | 240.348166  | 137.7274373 | 62.30530815 | 96.98830549 | Scn4b         |
| ENSMUSG00000006068  | 0.238279676  | -2.069272195 | 0.00010479 | 0.00039633 | 125.284095  | 51.8512382 | 52.0341391  | 26.92416067 | 12.80246058 | 15.31394297 | Abhd15        |
| ENSMUSG00000081382  | 10.73935112  | 3.424834922  | 0.00010487 | 0.00039786 | 0.8948864   | 1.9566055  | 3.71672422  | 31.06633923 | 23.04442904 | 13.27208391 | Rpl18-ps1     |
| ENSMUSG00000030701  | 0.407333417  | -1.295717919 | 0.00010615 | 0.00040205 | 274.7371012 | 564.493668 | 271.320868  | 181.2203122 | 123.7571189 | 148.0347821 | Plexh1        |
| ENSMUSG00000025478  | 0.175000367  | -2.51457015  | 0.0001062  | 0.00040218 | 23.2670463  | 21.5231555 | 27.2559776  | 4.142178564 | 3.13989488  | 5.104647658 | Dppk4b        |
| ENSMUSG00000039886  | 0.487466698  | -1.036624431 | 0.00010663 | 0.0004036  | 976.321057  | 709.285805 | 1522.61802  | 546.7675705 | 492.4679836 | 523.7368497 | Tmem120a      |
| ENSMUSG00000001155  | 7.780248015  | 2.959849523  | 0.00010766 | 0.00040717 | 6.26420477  | 4.89162624 | 9.91126458  | 37.27960708 | 17.92344481 | 107.1976008 | Ftcd          |
| ENSMUSG00000046844  | 0.320656392  | -1.640899927 | 0.00010854 | 0.0004103  | 64.4318205  | 45.0029614 | 42.1228745  | 15.53316962 | 18.77694218 | 14.29301344 | Vat1l         |
| ENSMUSG00000027603  | 2.055085193  | 1.039198202  | 0.00010874 | 0.00041087 | 108.281254  | 94.8975491 | 83.0068409  | 154.2961515 | 183.501935  | 252.1695943 | Ggt7          |
| ENSMUSG000000098202 | 0.144583413  | -2.790026047 | 0.00010901 | 0.00041171 | 24.1619327  | 57.7211897 | 145.952244  | 15.53316962 | 5.120984232 | 12.25151438 | B830012L14Rik |
| ENSMUSG00000021098  | 2.85603941   | 1.514015887  | 0.00011013 | 0.00041574 | 28.6363647  | 18.5881797 | 26.0170695  | 50.74168741 | 72.54727662 | 85.75808065 | 4930447C04Rik |
| ENSMUSG00000070323  | 0.26125538   | -1.936467347 | 0.00011017 | 0.00041581 | 57.2727293  | 40.1113352 | 47.0785068  | 19.67534818 | 11.09546584 | 7.146506721 | Mmp27         |
| ENSMUSG00000025127  | 14.36799049  | 3.844786395  | 0.00011164 | 0.00042069 | 2.68465919  | 0          | 4.95563229  | 30.03079459 | 11.94896321 | 64.31856049 | Gcgr          |
| ENSMUSG00000045871  | 0.282510143  | -1.823625427 | 0.0001121  | 0.00042223 | 103.806822  | 57.7211897 | 48.3174148  | 26.92416067 | 14.50945532 | 18.37673157 | Slitrk6       |
| ENSMUSG00000062713  | 0.035619817  | -4.811176089 | 0.00011243 | 0.00042338 | 17.5909116  | 81.2009956 | 16.1058409  | 1.035544641 | 2.560492116 | 0           | Sim2          |
| ENSMUSG00000024675  | 0.282908956  | -1.821590246 | 0.00011299 | 0.00042511 | 110.071027  | 505.794154 | 325.832823  | 93.19901769 | 56.44520303 | 76.56971486 | Ms444c        |
| ENSMUSG00000073413  | 3.347430327  | 1.743053989  | 0.00011362 | 0.00042713 | 11.6335231  | 12.7182782 | 14.8668969  | 34.17297315 | 92.06333969 | 43.8996986  | Lyg6d         |
| ENSMUSG00000037994  | 0.469920403  | -1.089511687 | 0.00011482 | 0.00043153 | 137.812505  | 91.9625734 | 136.279888  | 61.09713382 | 53.77033443 | 57.17205377 | Slc9b2        |
| ENSMUSG00000086763  | 0.150985094  | -2.727521969 | 0.00011671 | 0.00043845 | 15.2130687  | 41.0896604 | 33.450518   | 6.213267846 | 4.26748686  | 3.062788595 | Plxna4o5      |
| ENSMUSG00000038201  | 0.012842449  | -6.284953689 | 0.00011758 | 0.00044131 | 17.8977279  | 270.017769 | 27.2559776  | 3.106633923 | 0           | 1.020929532 | Kcna7         |
| ENSMUSG00000027510  | 2.189473874  | 1.130584235  | 0.00011781 | 0.00044199 | 263.991487  | 602.648353 | 332.027363  | 806.6892754 | 863.7393404 | 954.569112  | Rbm38         |
| ENSMUSG000000004961 | 0.174917729  | -2.515251576 | 0.00012188 | 0.00045633 | 28.6363647  | 23.479806  | 26.0170695  | 7.248812487 | 2.560492116 | 4.083718126 | Syt5          |
| ENSMUSG000000004814 | 0.343401799  | -1.542030496 | 0.000122   | 0.00045657 | 51.9034109  | 82.1793209 | 70.6177601  | 17.06994744 | 17.06994744 | 22.4604969  | Ccl24         |
| ENSMUSG00000067261  | 0.310159281  | -1.688918798 | 0.00012363 | 0.00046299 | 49.2187517  | 51.8512382 | 43.3617825  | 20.71089282 | 10.24196846 | 14.29301344 | Foxd3         |
| ENSMUSG00000000204  | 0.250913778  | -1.994736405 | 0.00012501 | 0.00046684 | 149.446028  | 773.855272 | 267.604144  | 110.8032766 | 75.96126611 | 112.3022485 | Sifn4         |
| ENSMUSG00000049097  | 2.499370971  | 1.321565051  | 0.00012515 | 0.00046725 | 48.3238654  | 34.2413837 | 32.2116099  | 70.41703559 | 107.5406689 | 110.2603894 | Ankrd34a      |
| ENSMUSG00000040441  | 0.433801959  | -1.204891528 | 0.00012577 | 0.00046936 | 68.5937531  | 81.2009956 | 64.4232198  | 31.06633923 | 34.13989488 | 36.75346313 | Slc26a10      |
| ENSMUSG00000034997  | 2.601974362  | 1.379606747  | 0.00012585 | 0.00046944 | 64.4318205  | 43.0463109 | 26.0170695  | 111.8388212 | 112.6615531 | 126.5952619 | Htr2a         |
| ENSMUSG00000022586  | 0.120739442  | -3.050031052 | 0.00012777 | 0.00047641 | 14.3181823  | 80.2226704 | 95.9283341  | 6.213267846 | 2.560492116 | 7.146506721 | Lyg1          |
| ENSMUSG00000041476  | 0.023110756  | -5.435291755 | 0.00012806 | 0.00047726 | 47.428979   | 608.518305 | 130.085348  | 15.53316962 | 1.706994744 | 1.020929532 | Smpx          |
| ENSMUSG00000035683  | 0.424572816  | -1.23591609  | 0.00012928 | 0.0004813  | 75.1704572  | 67.5044422 | 64.4232198  | 28.99524995 | 33.28639751 | 25.52323829 | Melk          |
| ENSMUSG00000038037  | 0.39116064   | -1.354166886 | 0.00012971 | 0.00048268 | 124.389209  | 235.776385 | 319.638283  | 83.87911592 | 90.47072143 | 90.86272831 | Socs1         |
| ENSMUSG000000110676 | 12.41335259  | 3.63841035   | 0.00013166 | 0.00048911 | 5.7954558   | 0.97832525 | 0           | 19.67534818 | 17.92344481 | 23.48137923 | Gm5897        |
| ENSMUSG00000060680  | 7.454522823  | 2.898116006  | 0.00013293 | 0.00049335 | 2.68465919  | 5.86995149 | 1.23890807  | 19.67534818 | 32.43290013 | 22.4604969  | Gm8894        |
| ENSMUSG00000030428  | 0.460674866  | -1.118179207 | 0.00013399 | 0.00049707 | 85.0142076  | 115.442379 | 102.82937   | 46.59950885 | 53.77033443 | 38.7953222  | Ttyh1         |
| ENSMUSG00000048621  | 0.395231143  | -1.339231463 | 0.00013597 | 0.00050388 | 54.5880701  | 69.4610927 | 70.6177601  | 20.71089282 | 27.3119159  | 28.58602688 | Gm6377        |
| ENSMUSG00000035456  | 0.203952609  | -2.29369413  | 0.0001367  | 0.00050633 | 25.9517055  | 41.0896604 | 33.450518   | 5.177723205 | 4.26748686  | 11.23022485 | Prdm8         |
| ENSMUSG00000003279  | 2.231962629  | 1.157946742  | 0.00013968 | 0.00051692 | 36.6903422  | 66.5261169 | 52.0341391  | 107.6966427 | 114.3686478 | 123.5247323 | Dlgap1        |
| ENSMUSG00000026068  | 0.410514346  | -1.284495455 | 0.00014123 | 0.00052231 | 68.9062524  | 108.594103 | 86.7235651  | 33.13742851 | 31.57940276 | 43.8996986  | Il18rap       |
| ENSMUSG00000024388  | 5.439871385  | 2.443572542  | 0.00014295 | 0.00052859 | 5.36931837  | 4.89162624 | 3.71672422  | 32.10188387 | 20.48393693 | 24.50230876 | Myo7b         |
| ENSMUSG000000045709 | 0.183810518  | -2.443708772 | 0.00014377 | 0.00053127 | 21.4772735  | 31.306408  | 29.7337937  | 3.106633923 | 7.681476348 | 4.083718126 | Smrn-ps       |
| ENSMUSG00000048911  | 2.321662536  | 1.215158285  | 0.00014479 | 0.00053469 | 380.326718  | 180.01846  |             |             |             |             |               |

|                    |             |              |             |            |            |            |            |             |             |             |               |
|--------------------|-------------|--------------|-------------|------------|------------|------------|------------|-------------|-------------|-------------|---------------|
| ENSMUSG00000048827 | 2.085289835 | 1.060247918  | 0.00017533  | 0.00063881 | 46.5340926 | 50.8729129 | 52.0341391 | 96.30565161 | 89.61722406 | 125.5743324 | Pkd1l3        |
| ENSMUSG00000103114 | 0.176542361 | -2.501913697 | 0.000017581 | 0.00064041 | 21.4772735 | 29.3497575 | 19.8225292 | 3.106633923 | 4.26748686  | 5.104647658 | Gm32200       |
| ENSMUSG00000026011 | 0.142006402 | -2.815972119 | 0.00017613  | 0.00064145 | 20.5283871 | 45.0029614 | 73.2337937 | 8.284357128 | 4.26748686  | 1.020929532 | Ctla4         |
| ENSMUSG00000032532 | 3.738124722 | 1.902314705  | 0.00017638  | 0.00064222 | 8.05397756 | 8.80492724 | 13.6279888 | 28.99524995 | 39.26087911 | 43.8996986  | Cck           |
| ENSMUSG00000050896 | 0.209057572 | -2.258027795 | 0.00017803  | 0.00064474 | 32.2159102 | 29.3497575 | 52.0341391 | 10.35544641 | 3.413989488 | 10.20929532 | Rtn4rl2       |
| ENSMUSG00000049122 | 0.339300656 | -1.559363876 | 0.00017895  | 0.00065045 | 64.4318205 | 70.4394179 | 50.795231  | 16.56871426 | 16.21645007 | 30.62788595 | Frm4d3        |
| ENSMUSG00000097804 | 0.104784739 | -3.254499475 | 0.00017932  | 0.00065154 | 13.4232959 | 31.306408  | 18.5836211 | 1.035544641 | 3.413989488 | 2.041859063 | Gm16685       |
| ENSMUSG00000027297 | 6.602443832 | 2.723000123  | 0.00017969  | 0.00065274 | 6.26420477 | 1.9566505  | 2.47781615 | 20.71089282 | 28.16541327 | 23.48137923 | Ltk           |
| ENSMUSG00000048142 | 0.481801101 | -1.053490405 | 0.0001822   | 0.00066129 | 400.909105 | 240.668011 | 496.802137 | 198.8245711 | 171.5529718 | 177.6417385 | Mnt8l         |
| ENSMUSG00000109097 | 0.241569743 | -2.049488327 | 0.00018422  | 0.00066806 | 43.8494334 | 35.219709  | 24.7781615 | 11.3909105  | 6.827978976 | 7.146506721 | Gm29683       |
| ENSMUSG00000102850 | 13.6514167  | 3.770978772  | 0.00018584  | 0.00067367 | 0.8948864  | 0.97832525 | 3.71672422 | 8.284357128 | 34.13989488 | 29.60695641 | Gm37082       |
| ENSMUSG00000030785 | 0.037094237 | -4.752661132 | 0.000188    | 0.00068102 | 75.1704572 | 1119.20408 | 193.269659 | 37.27960708 | 5.120984232 | 9.188365784 | Cox6a2        |
| ENSMUSG00000023919 | 2.070640174 | 1.050076871  | 0.00018817  | 0.0006812  | 71.5909116 | 87.0709471 | 47.0785068 | 143.9407051 | 145.9480506 | 138.8464163 | Cenpp         |
| ENSMUSG00000036381 | 0.341252319 | -1.551089245 | 0.00019114  | 0.00069121 | 49.2187517 | 112.507404 | 87.9624732 | 25.88861603 | 32.43290013 | 26.54416782 | P2ry14        |
| ENSMUSG00000032179 | 0.213824218 | -2.225502832 | 0.00019259  | 0.00069614 | 124.389209 | 46.9596119 | 40.8839664 | 22.7819821  | 13.65595795 | 9.188365784 | Bmp5          |
| ENSMUSG00000027887 | 0.064717867 | -3.949692124 | 0.00019268  | 0.00069632 | 110.965913 | 1780.55195 | 283.709949 | 54.88386597 | 46.08885809 | 39.81625173 | Sypl2         |
| ENSMUSG00000089665 | 0.27922514  | -1.840499255 | 0.00019275  | 0.00069643 | 68.9065254 | 52.8295634 | 105.307186 | 24.85307138 | 10.24196846 | 28.58602688 | Fcm13431      |
| ENSMUSG00000033249 | 0.498788459 | -1.00350001  | 0.00019296  | 0.00069706 | 101.122163 | 107.615777 | 100.351554 | 61.09713382 | 50.35634495 | 42.87904032 | Hsf4          |
| ENSMUSG00000058498 | 2.765720407 | 1.467655319  | 0.00019342  | 0.00069842 | 40.2698878 | 19.566058  | 21.0614372 | 82.84357128 | 71.69377947 | 71.66506721 | Rntf207       |
| ENSMUSG00000041193 | 6.044117722 | 2.59553176   | 0.00019446  | 0.00070187 | 2.68465919 | 8.80492724 | 2.47781615 | 26.92416067 | 23.89792642 | 34.71160407 | Pla2g5        |
| ENSMUSG00000058603 | 3.15111526  | 1.655862525  | 0.00019474  | 0.00070272 | 12.5284095 | 18.5881797 | 23.5392534 | 66.27485703 | 64.0123029  | 39.81625173 | Rpl28-ps1     |
| ENSMUSG00000087187 | 4.771200847 | 2.254352419  | 0.00019884  | 0.00071692 | 7.15909116 | 17.6098545 | 17.344713  | 72.48812487 | 28.16541327 | 99.03016456 | Gm13431       |
| ENSMUSG00000026383 | 2.015875416 | 1.011406481  | 0.00019922  | 0.00071815 | 127.968755 | 90.9842481 | 70.6177601 | 186.3980354 | 217.6418299 | 182.7463861 | Epb4115       |
| ENSMUSG00000020475 | 0.065776169 | -3.96291211  | 0.00019971  | 0.0007196  | 44.332401  | 5912.9978  | 965.109389 | 194.6823925 | 118.6361347 | 166.4115136 | Pgam2         |
| ENSMUSG00000022304 | 17.36874174 | 4.118421338  | 0.00020021  | 0.0007211  | 3.57954558 | 2.93497575 | 0          | 39.35069636 | 5.120984232 | 73.50692627 | Dpys          |
| ENSMUSG00000034382 | 0.294930701 | -1.761552085 | 0.00020278  | 0.00072941 | 74.2755708 | 69.4610927 | 97.8737377 | 22.7819821  | 11.09546584 | 37.77439267 | Al661453      |
| ENSMUSG00000027048 | 723.5992205 | 4.999047044  | 0.00020392  | 0.00073305 | 0          | 0          | 0          | 101.4833748 | 2.560492116 | 306.2788595 | Abcb11        |
| ENSMUSG00000028996 | 0.321445474 | -1.637354057 | 0.00020502  | 0.00073669 | 53.6931837 | 67.5044422 | 104.068278 | 24.85307138 | 31.57940276 | 15.31394297 | Rbp7          |
| ENSMUSG00000020205 | 0.477523383 | -1.066356716 | 0.00020608  | 0.00074038 | 400.909105 | 520.469032 | 831.307317 | 256.815071  | 247.5142379 | 331.8020977 | Phlda1        |
| ENSMUSG00000010021 | 0.202294561 | -2.305470563 | 0.00020749  | 0.00074504 | 17.8977279 | 55.7645392 | 45.8395987 | 7.248812487 | 7.681476348 | 9.188365784 | Kif19a        |
| ENSMUSG00000027253 | 0.425498948 | -1.232772528 | 0.00020932  | 0.00075104 | 406.278424 | 312.085754 | 267.604144 | 166.7226872 | 78.52175822 | 175.5998794 | Rck           |
| ENSMUSG00000097462 | 2.429539355 | -1.280682802 | 0.00021212  | 0.00076041 | 92.1732987 | 77.287694  | 35.9283341 | 160.5094194 | 174.9669613 | 167.4324442 | PS30026P05Rik |
| ENSMUSG00000081769 | 0.481555404 | -1.054226302 | 0.00021362  | 0.00076546 | 128.863641 | 214.253229 | 218.047821 | 79.73693736 | 100.7126899 | 88.82086924 | Gm12216       |
| ENSMUSG00000063193 | 0.405015162 | -1.303952176 | 0.00021395  | 0.00076641 | 156.605119 | 231.863084 | 192.030751 | 117.0165444 | 50.35634495 | 68.40227861 | Cd300lb       |
| ENSMUSG00000022218 | 0.206251322 | -2.277524727 | 0.0002142   | 0.00076707 | 55.8465919 | 35.219709  | 45.8395987 | 6.827978976 | 12.25115438 | 12.25115438 | Gm13431       |
| ENSMUSG00000073274 | 10.16682809 | 3.345797743  | 0.00021478  | 0.00076867 | 0.8948864  | 3.91330099 | 1.23890807 | 24.85307138 | 12.80246058 | 24.50230876 | Gm14636       |
| ENSMUSG00000019900 | 0.483075325 | -1.047799676 | 0.0002152   | 0.00076964 | 564.673315 | 540.035537 | 640.515474 | 250.6018031 | 186.9159245 | 407.3508831 | Pde7b         |
| ENSMUSG00000086826 | 2.117665756 | 1.082474898  | 0.00021516  | 0.00076984 | 41.1647742 | 39.1330099 | 43.3617825 | 72.48812487 | 94.73820829 | 93.9255169  | Gm11739       |
| ENSMUSG00000085604 | 0.382215394 | -1.38754221  | 0.00021623  | 0.00077338 | 81.434662  | 69.4610927 | 73.0955763 | 41.42178564 | 22.19093167 | 22.46044969 | Dhx58os       |
| ENSMUSG00000029591 | 0.379796825 | -1.39670025  | 0.00021765  | 0.00077812 | 59.9573885 | 79.2443451 | 105.307186 | 23.81752674 | 29.87240802 | 38.7953222  | Ung           |
| ENSMUSG00000078815 | 0.036368744 | -4.781155497 | 0.00021939  | 0.00078418 | 18.7926143 | 370.785269 | 17.8566682 | 11.3909105  | 3.413989488 | 2.041859063 | Cacng6        |
| ENSMUSG00000103932 | 0.153144217 | -1.992263599 | 0.00021962  | 0.00078482 | 81.434662  | 196.643375 | 462.112711 | 62.13267846 | 51.20984232 | 74.68599674 | Gm36963       |
| ENSMUSG00000036469 | 0.395398699 | -1.338619971 | 0.00022156  | 0.00079127 | 226.406258 | 256.321215 | 218.047821 | 67.31040167 | 148.5085427 | 60.23484236 | 1-Mar         |
| ENSMUSG00000060063 | 0.491252037 | -1.025464706 | 0.00022174  | 0.00079172 | 614.786954 | 1373.56865 | 1062.98313 | 510.523508  | 452.3536071 | 535.9880041 | Alox5ap       |
| ENSMUSG00000044288 | 0.278524624 | -1.844123216 | 0.00022297  | 0.00079594 | 92.1732987 | 35.219709  | 60.9010359 | 17.6042589  | 23.04442904 | 13.27208391 | Cnr1          |
| ENSMUSG00000058207 | 69.45222263 | 6.117948959  | 0.00022537  | 0.00080416 | 27.7414783 | 9.78325249 | 19.8225292 | 1094.570686 | 4.26748686  | 2885.146856 | Serpina3k     |
| ENSMUSG00000099041 | 2.434500239 | 1.283625642  | 0.00022937  | 0.0008171  | 66.2215933 | 41.0896604 | 33.450518  | 119.0876337 | 133.14559   | 92.90458737 | Gm28035       |
| ENSMUSG00000109038 | 0.192528837 | -2.376853545 | 0.00022942  | 0.00081871 | 19.6875587 | 42.0679857 | 38.4061503 | 9.319901769 | 6.827978976 | 3.062788595 | Gm15438       |
| ENSMUSG00000101655 | 0.149611124 | -2.745056525 | 0.00022983  | 0.00081802 | 34.9005694 | 298.389201 | 59.4675875 | 12.42653569 | 19.63043956 | 26.54416782 | Z130040G24Rik |
| ENSMUSG00000032204 | 3.457896587 | 1.789894724  | 0.00023042  | 0.00081979 | 17.8977279 | 37.279806  | 33.450518  | 94.23456233 | 43.52833567 | 119.4487552 | Aqp9          |
| ENSMUSG00000037334 | 0.084815453 | -3.559529046 | 0.00023004  | 0.00081979 | 25.0568191 | 20.5448302 | 9.91126458 | 1.035544641 | 2.560492116 | 1.020929532 | H2-M1         |
| ENSMUSG00000026443 | 0.377458886 | -1.405608585 | 0.00023922  | 0.0008502  | 85.0142076 | 56.7428644 | 80.5290247 | 37.27960708 | 20.48393693 | 26.54416782 | Lrm2          |
| ENSMUSG00000025429 | 0.23811451  | -2.070272559 | 0.00023947  | 0.00085059 | 55.4829565 | 121.312331 | 35.9283341 | 16.56871426 | 11.94896321 | 22.46044969 | Pstip2        |
| ENSMUSG00000046959 | 4.231563473 | 2.081190807  | 0.0002431   | 0.00086326 | 25.0568191 | 13.6965535 | 74.3344844 | 67.31040167 | 37.55388437 | 93.9255169  | Slc26a1       |
| ENSMUSG00000084168 | 6.562884272 | 2.714329993  | 0.00024694  | 0.00087598 | 2.68465919 | 11.739903  | 1.23890807 | 33.13742851 | 35.84688962 | 35.7325336  | Atp5f12-ps    |
| ENSMUSG00000093838 | 0.021298972 | -5.553072391 | 0.00024764  | 0.00087809 | 74.2755708 | 4.89162624 | 13.6279888 | 2.071089282 | 0           | 0           | Ighv3-1       |
| ENSMUSG00000031489 | 0.411840852 | -1.279841152 | 0.00024781  | 0.0008785  | 389.275582 | 404.048328 | 936.614503 | 272.3482406 | 205.6928666 | 233.7928627 | Adrb3         |
| ENSMUSG00000047497 | 0.124992572 | -3.000885739 | 0.0002494   | 0.00088376 | 95.7528443 | 373.720245 | 113.979545 | 67.31040167 | 47.62629239 | 45.94182894 | Adams12       |
| ENSMUSG00000034634 | 3.808725181 | 1.929308195  | 0.0002509   | 0.00088873 | 11.6353231 | 32.847332  | 29.7337937 | 79.73693736 | 143.3875585 | 55.1301947  | Lyd6          |
| ENSMUSG00000086845 | 4.409413819 | 2.140586879  | 0.00025098  | 0.00088882 | 4.74443198 | 12.7182282 | 9.91126458 | 38.31515172 | 37.2719159  | 53.08833564 | Gm13010       |
| ENSMUSG00000109780 | 3.484297506 | 1.800867813  | 0.0002515   | 0.00089048 | 8.94886395 | 11.739903  | 12.3890807 | 46.59950885 | 39.26087911 | 28.58602688 | Gm45447       |
| ENSMUSG00000080318 | 0.396434444 | -1.334845779 | 0.00025319  | 0.00089582 | 80.5397756 | 188.816773 | 144.952244 | 51.77723205 | 58.03782129 | 54.10926517 | Relt          |
| ENSMUSG00000082035 | 10.48805496 | 3.390675245  | 0.0002532   | 0.00089582 | 0          | 3.91330099 | 2.47781615 | 21.74643746 | 28.16541327 | 15.31394297 | Rpl7-ps8      |
| ENSMUSG00000000791 | 0.144013689 | -2.795722141 | 0.00025434  | 0.00089941 | 18.7926143 | 41.0896604 | 18.5836211 | 3.106633923 | 5.974481604 | 2.041859063 | Il12rb1       |
| ENSMUSG00000069273 | 8.366349512 | 3.064598269  | 0.00025481  | 0.00090089 | 5.36931837 | 0.97832525 | 1.23890807 | 23.81752674 | 17.92344481 | 24.50230876 | Hist1h3e      |
| ENSMUSG00000079019 | 0.268389518 | -1.897599766 | 0.0002562   | 0.00090561 | 53.6931837 | 33.2630585 | 32.1216099 | 10.35544641 | 7.681476348 | 14.29301344 | Ins1          |

|                     |              |              |            |             |             |            |             |             |             |             |               |
|---------------------|--------------|--------------|------------|-------------|-------------|------------|-------------|-------------|-------------|-------------|---------------|
| ENSMUSG00000031438  | 0.103791769  | -3.268236051 | 0.00029467 | 0.00103018  | 124.389209  | 546.883814 | 308.48811   | 32.10188387 | 8.53497372  | 61.25577189 | Rnf128        |
| ENSMUSG00000066154  | 57.71557071  | 5.850888682  | 0.0002981  | 0.00104131  | 46.5340926  | 15.653204  | 34.689426   | 1648.587069 | 7.681476348 | 3935.683344 | Mup3          |
| ENSMUSG000000100183 | 6.579957358  | 2.718078235  | 0.00030149 | 0.00105274  | 9.84375035  | 5.86995149 | 0           | 36.24406244 | 42.6748686  | 28.58602688 | Gm28512       |
| ENSMUSG00000058905  | 7.76579023   | 2.820850919  | 0.00030204 | 0.00105445  | 0.8948864   | 5.86995149 | 3.71672422  | 17.6042589  | 24.75142379 | 30.62788595 | Gm10051       |
| ENSMUSG00000061808  | 42.94901209  | 5.424553042  | 0.00030265 | 0.0010559   | 20.5823871  | 34.2413837 | 19.8225292  | 746.6276862 | 10.24196846 | 2450.230876 | Ttr           |
| ENSMUSG00000023243  | 0.331891176  | -1.591217822 | 0.00030507 | 0.00106392  | 87.6988667  | 78.2660199 | 52.0341391  | 23.81752674 | 14.50945552 | 34.71160407 | KcmK5         |
| ENSMUSG00000019767  | 0.245979088  | -2.023392424 | 0.00030589 | 0.00106654  | 67.1164797  | 33.2630585 | 27.2559776  | 9.319901769 | 11.94896321 | 10.20929532 | Ccdc170       |
| ENSMUSG00000033898  | 11.18029957  | 3.48288694   | 0.00030703 | 0.00106966  | 10.7386367  | 3.91330099 | 8.67235651  | 63.1682231  | 5.974481604 | 191.9347519 | Cfhr2         |
| ENSMUSG000000100975 | 0.401316561  | -1.317187402 | 0.00030701 | 0.00106966  | 198.66478   | 310.129104 | 561.225357  | 156.3672408 | 125.4641137 | 147.0138525 | Gm28875       |
| ENSMUSG000000111512 | 5.546067401  | 2.47146515   | 0.00030896 | 0.00107593  | 7.15909116  | 3.91330099 | 2.47781615  | 27.95970531 | 30.72590539 | 18.37673157 | AC112680.1    |
| ENSMUSG00000027313  | 0.272898399  | -1.873564162 | 0.00031043 | 0.0010806   | 50.1136381  | 138.922185 | 74.3344844  | 25.88861603 | 32.43290013 | 13.27208391 | Chac1         |
| ENSMUSG00000002068  | 0.417303114  | -1.26083241  | 0.00031224 | 0.001086    | 51.9034109  | 56.7428644 | 60.7064956  | 25.88861603 | 21.3374343  | 23.48137923 | Ccne1         |
| ENSMUSG00000027556  | 6.07613053   | 2.603152863  | 0.0003124  | 0.00108634  | 2.68465919  | 4.89162624 | 2.47781615  | 20.71089282 | 20.48393693 | 20.41859063 | Car1          |
| ENSMUSG00000045667  | 0.227081627  | -2.13871711  | 0.00031364 | 0.00109026  | 130.653414  | 812.009956 | 168.491498  | 82.84357128 | 82.78924508 | 86.77901018 | Smtnl2        |
| ENSMUSG00000029158  | 0.036960761  | -4.757861724 | 0.00031452 | 0.00109306  | 3.57954558  | 111.529078 | 21.0614372  | 4.142178564 | 0           | 1.020929532 | Yipf7         |
| ENSMUSG00000063458  | 0.239842062  | -2.059843403 | 0.00031723 | 0.00110222  | 52.7982973  | 32.2847332 | 48.3174148  | 5.177723205 | 8.53497372  | 18.37673157 | Lrmda         |
| ENSMUSG00000021898  | 0.161033043  | -2.634598222 | 0.00032283 | 0.00111987  | 36.6903422  | 229.906433 | 45.8395987  | 22.7819821  | 9.388471092 | 18.37673157 | Asb14         |
| ENSMUSG00000029445  | 54.94500457  | 5.779916417  | 0.0003233  | 0.00112125  | 4.47443198  | 5.86995149 | 2.47781615  | 182.2558568 | 1.706994744 | 523.7368497 | Hpd           |
| ENSMUSG00000062939  | 0.284992475  | -1.811004269 | 0.00032654 | 0.00113179  | 28.6363647  | 66.5261169 | 59.4675875  | 11.39099105 | 17.06994744 | 15.31394297 | Stat4         |
| ENSMUSG00000070336  | 6.205229323  | 2.633484528  | 0.00032789 | 0.001136    | 6.26420477  | 5.86995149 | 1.23890807  | 42.45733028 | 23.89792642 | 19.3976611  | Fbox47        |
| ENSMUSG00000019027  | 0.21618878   | -2.209636443 | 0.00033117 | 0.00114691  | 68.0113661  | 31.306408  | 52.0341391  | 18.63980354 | 4.26748686  | 10.20929532 | Dnah1         |
| ENSMUSG00000044229  | 0.495872037  | -1.011960224 | 0.00033282 | 0.001151592 | 383.011377  | 336.543886 | 192.030751  | 158.4383301 | 141.6805637 | 153.1394297 | Nxpe4         |
| ENSMUSG00000036634  | 0.168669191  | -2.567731618 | 0.00033569 | 0.00116114  | 25.9517055  | 58.6995149 | 30.9727018  | 5.177723205 | 11.94896321 | 2.041859063 | Azgp1         |
| ENSMUSG00000037053  | 47.333318639 | 5.564779957  | 0.00033607 | 0.00116384  | 7.15909116  | 1.9566505  | 4.95563229  | 198.8245711 | 2.560492116 | 465.5438664 | Mzgpl         |
| ENSMUSG00000020963  | 0.455388251  | -1.134831025 | 0.00033821 | 0.00116872  | 121.70455   | 73.3743936 | 106.546094  | 48.67059813 | 40.96787385 | 47.98368798 | Tshr          |
| ENSMUSG00000049173  | 0.020727757  | -5.592292206 | 0.00033937 | 0.00117194  | 8.05397756  | 130.117258 | 1.23890807  | 0           | 0.853497372 | 2.041859063 | Myoz3         |
| ENSMUSG00000044921  | 0.357781612  | -1.48248853  | 0.00034055 | 0.00117577  | 171.818188  | 82.1793209 | 86.7235651  | 49.70614277 | 29.01891065 | 43.8996986  | Rsf9          |
| ENSMUSG00000040729  | 3.693850475  | 1.885125468  | 0.00034265 | 0.00118232  | 51.9034109  | 27.393107  | 12.3890807  | 83.87911592 | 92.17771617 | 166.4115136 | Cep126        |
| ENSMUSG00000075296  | 0.217702267  | -2.199571662 | 0.00034456 | 0.00118834  | 104.701708  | 78.2660199 | 60.7064956  | 34.17297315 | 5.120984232 | 14.29301344 | Aldh3b2       |
| ENSMUSG00000018822  | 0.208542917  | -2.261583781 | 0.00034607 | 0.00119337  | 91.2784123  | 432.41976  | 71.8566882  | 51.77723205 | 35.84688962 | 36.75346313 | Fbp5          |
| ENSMUSG00000046245  | 0.365334475  | -1.452710193 | 0.00034711 | 0.00119625  | 106.491481  | 183.925147 | 162.296958  | 69.38149095 | 28.16541327 | 68.40227861 | Pilra         |
| ENSMUSG00000044309  | 0.007133346  | -3.393889535 | 0.00034754 | 0.00119747  | 21.4777235  | 24.4581312 | 13.6279888  | 4.142178564 | 1.706994744 | 0           | Apol7c        |
| ENSMUSG00000021396  | 2.573025994  | 1.363466032  | 0.00034853 | 0.00120065  | 19.6875007  | 19.566505  | 30.9727018  | 50.74168741 | 61.45181078 | 66.36041955 | Nxnl2         |
| ENSMUSG000000108841 | 0.215024605  | -2.217426341 | 0.00035257 | 0.00121383  | 50.1136381  | 18.5881797 | 63.1843117  | 11.39099105 | 6.827978976 | 10.20929532 | Frmpp2        |
| ENSMUSG000000103881 | 0.096096646  | -3.379370116 | 0.00035277 | 0.00121425  | 13.4232959  | 12.7182282 | 43.3617825  | 2.071089282 | 3.413989488 | 1.020929532 | Gm10748       |
| ENSMUSG00000041552  | 0.351906268  | -1.506736882 | 0.00035575 | 0.00122353  | 71.5909116  | 59.6778402 | 42.128745   | 23.81752674 | 23.04442904 | 14.29301344 | Ptchd1        |
| ENSMUSG000000110508 | 0.401961067  | -2.007055749 | 0.00035687 | 0.00122637  | 3.563931837 | 8.80492724 | 7.43344844  | 23.81752674 | 29.87240802 | 32.66974501 | Gm36033       |
| ENSMUSG00000031962  | 0.052014064  | -4.264954429 | 0.0003594  | 0.00123458  | 6.26420477  | 52.8295634 | 17.344713   | 2.071089282 | 0           | 2.041859063 | Cdh15         |
| ENSMUSG00000042828  | 0.062300521  | -4.004611957 | 0.00035954 | 0.00123481  | 49.2187517  | 926.47401  | 224.242361  | 41.42178564 | 17.06994744 | 16.3348725  | Trim72        |
| ENSMUSG000000104174 | 6.780637664  | 2.761420954  | 0.00036156 | 0.00124148  | 3.57954558  | 0.9783255  | 6.19454036  | 31.06633923 | 21.3373433  | 18.37673157 | Gm37701       |
| ENSMUSG000000102153 | 0.291678047  | -1.777551291 | 0.00036411 | 0.00124222  | 71.5909116  | 214.253229 | 299.815754  | 44.52841956 | 49.50284757 | 76.56971486 | Gm37474       |
| ENSMUSG000000109625 | 0.13204463   | -2.920902468 | 0.00036522 | 0.00125229  | 17.0028415  | 38.1546847 | 50.795231   | 4.142178564 | 0.853497372 | 9.188365784 | 3110080E11Rik |
| ENSMUSG000000110547 | 0.113252066  | -3.142390731 | 0.00036751 | 0.00125961  | 11.6335231  | 130.117258 | 29.7337937  | 5.177723205 | 5.120984232 | 9.188365784 | Gm29773       |
| ENSMUSG000000107331 | 2.149373321  | 1.103916084  | 0.00036854 | 0.00126229  | 62.6420477  | 44.0246362 | 34.689426   | 107.6966427 | 99.85919252 | 99.03016456 | Gm42732       |
| ENSMUSG000000108601 | 0.384721702  | -1.378112882 | 0.0003725  | 0.00127544  | 76.96023    | 110.550753 | 163.53866   | 36.24406244 | 39.26087911 | 59.21391283 | Gm44645       |
| ENSMUSG00000037892  | 0.450000188  | -1.152002492 | 0.00037272 | 0.00127592  | 507.400586  | 212.296579 | 330.788455  | 150.1539729 | 143.3875585 | 179.6835975 | Pcdh18        |
| ENSMUSG000000106112 | 0.131149338  | -2.930717564 | 0.00037357 | 0.00127857  | 31.3210238  | 27.393107  | 40.8839664  | 5.177723205 | 0           | 8.167436252 | Gm43434       |
| ENSMUSG00000097974  | 0.288746241  | -1.792125929 | 0.00037403 | 0.00127989  | 45.6392062  | 63.5911412 | 39.5405083  | 22.7819821  | 9.388471092 | 11.23022485 | Gm10605       |
| ENSMUSG00000069805  | 377.1309317  | 8.558921673  | 0.00037613 | 0.00128658  | 0.8948864   | 0          | 83.87911592 | 0.853497372 | 0.853497372 | 331.8020977 | Fbp1          |
| ENSMUSG00000032181  | 0.402865043  | -1.311631468 | 0.00038041 | 0.00130012  | 68.9062524  | 60.6561654 | 69.3788521  | 33.13742851 | 17.92344481 | 29.60695641 | Scg3          |
| ENSMUSG00000026204  | 0.381931637  | -1.388613667 | 0.00038109 | 0.00130167  | 59.9573885  | 75.3310441 | 125.129715  | 28.99524995 | 34.13989488 | 35.7325336  | Ptprn         |
| ENSMUSG00000074768  | 1508.286474  | 10.55869476  | 0.00038369 | 0.0013103   | 0           | 0          | 0           | 208.1444728 | 0.853497372 | 646.2483935 | Bhmt          |
| ENSMUSG00000034329  | 2.037358967  | 1.026700195  | 0.00038576 | 0.00131717  | 68.0113661  | 65.5477917 | 66.9010359  | 153.2606069 | 158.7505112 | 95.96737596 | Brip1         |
| ENSMUSG00000068373  | 0.087647305  | -3.512146455 | 0.00038728 | 0.00132202  | 14.3181823  | 40.1113352 | 12.3890807  | 1.035544641 | 0.853497372 | 4.083718126 | D430041D05Rik |
| ENSMUSG00000042097  | 2.500860695  | 1.322424697  | 0.00039091 | 0.0013339   | 28.6363647  | 21.5231555 | 18.8836211  | 51.77723205 | 56.33949002 | 2fzp239     |               |
| ENSMUSG00000056880  | 0.066713509  | -3.905877262 | 0.00039357 | 0.00134184  | 3.57954558  | 90.0059229 | 23.5392534  | 3.106633923 | 1.706994744 | 3.062788595 | Gad1          |
| ENSMUSG000000107304 | 0.138546267  | -2.851560253 | 0.00039364 | 0.00134184  | 10.7386367  | 37.1763594 | 69.3788521  | 3.106633923 | 6.827978976 | 6.125577189 | Gm43775       |
| ENSMUSG00000076672  | 0.134878358  | -2.891283793 | 0.00039468 | 0.00134513  | 17.8977237  | 37.1763594 | 16.1058049  | 5.177723205 | 3.413989488 | 1.020929532 | Ighv3-6       |
| ENSMUSG00000022383  | 3.226340558  | 1.689898731  | 0.00039492 | 0.00134568  | 39.3750014  | 15.653204  | 14.8668699  | 64.20376774 | 69.13328713 | 94.94644643 | Ppara         |
| ENSMUSG00000085585  | 8.65663593   | 3.113806486  | 0.00039739 | 0.00135383  | 1.789777279 | 1.9566505  | 2.47781615  | 19.67534818 | 22.19093167 | 11.23022485 | Gm12223       |
| ENSMUSG00000047793  | 0.186322289  | -2.424127826 | 0.00039814 | 0.00135609  | 3840.85241  | 1612.28001 | 659.099095  | 459.7818206 | 326.0359961 | 353.2416179 | Sned1         |
| ENSMUSG00000026616  | 5.13769149   | 2.361120261  | 0.00039924 | 0.00135931  | 6.26420477  | 10.7615777 | 9.91126458  | 27.95970531 | 83.64274245 | 25.52323829 | Cr2           |
| ENSMUSG000000107481 | 0.357349926  | -1.484590607 | 0.00040158 | 0.001367    | 40.2698878  | 48.9162624 | 66.9010359  | 18.63980354 | 21.3374343  | 15.31394297 | 8433403J16Rik |
| ENSMUSG00000097791  | 3.361034282  | 1.748905258  | 0.00040413 | 0.00137482  | 19.6875007  | 18.5881797 | 7.43344844  | 41.42178564 | 67.42629239 | 46.96275845 | Gm17315       |
| ENSMUSG00000078672  | 166.1416854  | 3.767270285  | 0.0004057  | 0.00137977  | 6.26420477  | 0.97832525 | 0           | 420.4311243 | 1.706994744 | 800.4087527 | Mup20         |
| ENSMUSG00000089704  | 3.220648858  | 1.687351375  | 0.00040765 | 0.00138541  | 82.3295484  | 50.8729129 | 18.5836211  | 184.3269461 | 186.9159245 | 121.4906143 | Galnt2        |
| ENSMUSG00000037418  | 0.301593596  | -1.7         |            |             |             |            |             |             |             |             |               |

|                     |              |              |            |            |            |            |            |             |             |             |               |
|---------------------|--------------|--------------|------------|------------|------------|------------|------------|-------------|-------------|-------------|---------------|
| ENSMUSG00000022415  | 0.496812152  | -1.009227632 | 0.00044973 | 0.00150995 | 83.2244348 | 107.615777 | 104.068278 | 48.67059813 | 56.33082655 | 40.83718126 | Syng1         |
| ENSMUSG00000026285  | 0.186994191  | -2.418934642 | 0.00044989 | 0.00151018 | 18.7926143 | 38.1546847 | 21.0614372 | 7.248812487 | 3.413989488 | 4.083718126 | Pcd1          |
| ENSMUSG00000090622  | 2.374420141  | 1.247575234  | 0.00045017 | 0.00151084 | 121.70455  | 91.9625734 | 43.3617825 | 218.4999193 | 198.8648877 | 197.0393996 | A930033H14Rik |
| ENSMUSG00000097585  | 0.277926887  | -1.847222683 | 0.00045197 | 0.00151628 | 38.1546841 | 38.1546847 | 89.2013812 | 11.3909105  | 16.3347821  | 16.3347821  | E230029C05Rik |
| ENSMUSG00000072647  | 2.187069451  | 1.128999034  | 0.00045248 | 0.00151767 | 86.8039804 | 45.9812867 | 54.1519552 | 118.0520891 | 133.14559   | 160.2859364 | Adam1a        |
| ENSMUSG00000018986  | 0.329644122  | -1.60101874  | 0.00045297 | 0.00151901 | 142.286937 | 76.3093694 | 49.5563229 | 31.06633923 | 28.1654327  | 29.60695641 | Sfn3          |
| ENSMUSG00000022546  | 0.425340402  | -1.233310196 | 0.0004545  | 0.00152384 | 320.36933  | 236.75471  | 459.634895 | 166.7226872 | 85.3497372  | 180.7045271 | Gpt           |
| ENSMUSG00000022996  | 0.350960601  | -1.510619014 | 0.00046457 | 0.00155606 | 54.5880701 | 50.8729129 | 33.450518  | 17.6042589  | 17.06994744 | 14.29301344 | Wnt10b        |
| ENSMUSG00000105940  | 4.510505532  | 2.173289138  | 0.000474   | 0.00158548 | 18.7926143 | 2.93497575 | 9.91126458 | 53.84832133 | 51.20984232 | 38.7953222  | Gm42635       |
| ENSMUSG00000005580  | 2.183647798  | 1.126740182  | 0.0004746  | 0.00158714 | 400.909105 | 250.451264 | 147.430061 | 598.5448025 | 563.3082655 | 587.0344806 | Adcy9         |
| ENSMUSG00000040658  | 0.169890327  | -2.557324386 | 0.0004753  | 0.00158918 | 17.8977279 | 43.0463109 | 27.2559776 | 2.071089282 | 8.53497372  | 4.083718126 | Dnph1         |
| ENSMUSG00000085771  | 0.204118934  | -2.29251808  | 0.00047688 | 0.00159384 | 18.7926143 | 45.0029614 | 52.0341391 | 7.248812487 | 11.94896321 | 4.083718126 | C230066G23Rik |
| ENSMUSG00000054383  | 2.653536625  | 1.407916461  | 0.00048098 | 0.0016066  | 19.6875007 | 19.566505  | 16.1058049 | 40.386241   | 58.89131867 | 47.98368798 | Pnma1         |
| ENSMUSG00000108486  | 0.26883988   | -1.89518093  | 0.00048299 | 0.00161299 | 34.9005694 | 92.9408986 | 121.412991 | 31.06633923 | 20.48393693 | 15.31394297 | Gm44836       |
| ENSMUSG00000081583  | 3.128317001  | 1.645386712  | 0.00048443 | 0.00161747 | 13.4232959 | 12.7182282 | 33.450518  | 64.20376774 | 55.47732918 | 63.29763095 | Gm14769       |
| ENSMUSG000000003779 | 0.32706747   | -1.612339818 | 0.00048767 | 0.00162766 | 161.974438 | 138.922185 | 61.9454036 | 52.81277669 | 42.6748686  | 23.48137923 | Kif20a        |
| ENSMUSG00000028125  | 0.24925216   | -2.00432209  | 0.00049105 | 0.00163732 | 62.6420477 | 23.479806  | 33.450518  | 9.388471092 | 10.35544641 | 10.20929532 | Abca4         |
| ENSMUSG00000001865  | 0.47010957   | -1.088931046 | 0.00049293 | 0.00164295 | 154.815346 | 192.730074 | 105.307186 | 85.9520522  | 67.42629234 | 60.23484236 | Cpa3          |
| ENSMUSG00000040086  | 3.962137634  | 1.986278996  | 0.00049354 | 0.00164466 | 8.05397756 | 17.6098545 | 7.43344844 | 42.45733028 | 60.59831341 | 28.58602688 | Tnni3k        |
| ENSMUSG00000029379  | 0.081078818  | -3.624531131 | 0.00049372 | 0.00164476 | 5.36931837 | 129.138933 | 40.8839664 | 1.035544641 | 5.974481604 | 7.146506721 | Cxcl3         |
| ENSMUSG00000026253  | 0.060918978  | -4.036964449 | 0.00050262 | 0.00167127 | 4.74443198 | 43.0463109 | 34.689426  | 3.106633923 | 0           | 2.041859063 | Chnrg         |
| ENSMUSG00000103469  | 2.712271356  | 1.439501524  | 0.00050422 | 0.00167595 | 68.0113661 | 49.8945877 | 33.450518  | 101.4833748 | 206.546364  | 104.1348122 | Gm9910        |
| ENSMUSG00000100280  | 0.326985391  | -1.612701915 | 0.00050809 | 0.00168814 | 30.4261374 | 51.8512382 | 42.1228745 | 13.46208033 | 11.94896321 | 15.31394297 | Gm28417       |
| ENSMUSG00000105748  | 0.3681572642 | -1.467642575 | 0.00050932 | 0.00169124 | 59.0625021 | 86.0926219 | 143.713336 | 34.17297315 | 28.16541327 | 41.85811079 | Gm43088       |
| ENSMUSG00000035540  | 482.870864   | 8.915493605  | 0.00051081 | 0.00169552 | 0          | 0          | 6.19454036 | 796.3338289 | 4.26748686  | 2131.700862 | Gc            |
| ENSMUSG00000087410  | 0.062345145  | -4.003578977 | 0.0005113  | 0.00169681 | 12.5284095 | 113.485729 | 11.1501727 | 0           | 3.413989488 | 5.104647658 | Z310065F04Rik |
| ENSMUSG00000044164  | 3.948487799  | 1.981300232  | 0.00051596 | 0.00171129 | 11.6335231 | 6.84827674 | 9.91126458 | 28.99524995 | 27.3119159  | 56.15124231 | Rnf182        |
| ENSMUSG00000103916  | 0.298539301  | -1.744007229 | 0.00052551 | 0.00174055 | 41.1647742 | 53.8078887 | 118.935175 | 19.67534818 | 21.3374343  | 22.46044969 | Gm38071       |
| ENSMUSG000000082738 | 2.597315914  | 1.377021501  | 0.00053258 | 0.00176295 | 34.9005694 | 22.5014807 | 58.286794  | 83.87911592 | 115.2221452 | 98.00923503 | Gm15422       |
| ENSMUSG00000045327  | 0.34961507   | -1.516160722 | 0.00053418 | 0.00176799 | 59.0625021 | 86.0926219 | 141.23552  | 25.88861603 | 29.01891065 | 44.92089939 | G330549D23Rik |
| ENSMUSG00000073680  | 0.319535283  | -1.645952851 | 0.00053661 | 0.00177526 | 33.1107966 | 42.0679857 | 29.7337937 | 10.35544641 | 11.94896321 | 11.23022485 | Tmem88b       |
| ENSMUSG00000019933  | 0.10280835   | -3.281970652 | 0.00053932 | 0.00178317 | 8.05397756 | 108.594103 | 33.450518  | 8.284357128 | 5.120984232 | 2.041859063 | Mfn           |
| ENSMUSG00000092569  | 2.268334125  | 1.181633165  | 0.0005434  | 0.00179492 | 31.3210238 | 31.306408  | 23.5392534 | 71.45258023 | 69.9867845  | 55.1301947  | Gm20544       |
| ENSMUSG00000089797  | 0.251704     | -1.990199949 | 0.00054367 | 0.00179509 | 36.6903422 | 20.5448302 | 30.9727018 | 9.319901769 | 6.827978976 | 6.125577189 | Gm16118       |
| ENSMUSG00000097906  | 2.688626478  | 1.42686934   | 0.00055254 | 0.00182225 | 15.2130687 | 14.6748787 | 18.5836211 | 45.5639642  | 46.08885809 | 37.77439267 | Gm9625        |
| ENSMUSG00000054630  | 1020.62238   | 9.995233467  | 0.00055457 | 0.00182823 | 0          | 0          | 0          | 147.047339  | 0.853497372 | 430.8322623 | Ugt2b5        |
| ENSMUSG00000036198  | 0.352359789  | -1.504878799 | 0.00055717 | 0.00183609 | 71.5909116 | 51.8512382 | 37.1672422 | 16.56871426 | 17.92344481 | 22.46044969 | Arhgap36      |
| ENSMUSG00000103882  | 0.285630767  | -1.807776704 | 0.00056376 | 0.00185528 | 47.428979  | 173.163569 | 219.286729 | 47.63505349 | 34.99339225 | 42.87904032 | Gm37452       |
| ENSMUSG00000109714  | 0.231670141  | -2.10985598  | 0.00056425 | 0.00185655 | 28.6363647 | 29.3497575 | 21.0614372 | 4.142178564 | 5.120984232 | 9.188365784 | Gm35021       |
| ENSMUSG00000053846  | 0.173970062  | -2.523089034 | 0.00056627 | 0.00186138 | 13.4232959 | 40.1113352 | 37.1672422 | 6.213267846 | 2.560491216 | 7.146506721 | Lipg          |
| ENSMUSG00000109751  | 0.228606473  | -2.129073202 | 0.00056701 | 0.00186343 | 30.4261374 | 128.166068 | 208.136556 | 21.74643746 | 28.16541327 | 33.69067454 | Gm45479       |
| ENSMUSG00000034435  | 0.364079092  | -1.457672023 | 0.00057111 | 0.00187511 | 69.8011317 | 64.5694664 | 105.307186 | 19.63043956 | 48.79904032 | 48.79904032 | Tmem30b       |
| ENSMUSG00000106706  | 0.240774207  | -2.054247246 | 0.00057799 | 0.00189623 | 56.3778429 | 170.228593 | 318.399375 | 21.74643746 | 52.91683706 | 56.15112423 | C530043K16Rik |
| ENSMUSG00000119235  | 0.443992505  | -1.171392773 | 0.00058095 | 0.00190444 | 62.6420477 | 88.0492724 | 81.7679328 | 42.45733028 | 27.3119159  | 33.69067454 | Rps6k1        |
| ENSMUSG00000044689  | 0.137323729  | -2.86434716  | 0.00059002 | 0.0019325  | 46.5340926 | 16.6315292 | 13.2798888 | 5.177723205 | 3.413989488 | 2.041859063 | Gm13749       |
| ENSMUSG00000025019  | 2.222699114  | 1.152312664  | 0.0005937  | 0.00194287 | 161.079551 | 101.745826 | 61.9454036 | 254.7439817 | 231.2977878 | 239.9184399 | Lcor          |
| ENSMUSG00000040705  | 0.159929022  | -2.644496325 | 0.00059416 | 0.001944   | 23.2670463 | 239.689686 | 48.3174148 | 14.49762497 | 17.92344481 | 17.35580204 | A930016O22Rik |
| ENSMUSG00000045689  | 0.29908043   | -1.741394583 | 0.00059849 | 0.00195707 | 53.6931837 | 31.306408  | 29.7337937 | 10.35544641 | 12.80245058 | 11.23022485 | Pcdh4b        |
| ENSMUSG00000104851  | 0.279092202  | -1.841186281 | 0.0005985  | 0.00195707 | 59.9573885 | 107.615777 | 266.365236 | 31.06633923 | 48.6493502  | 40.83718126 | E030026E10Rik |
| ENSMUSG00000044296  | 2.842683805  | 1.507253635  | 0.00060215 | 0.0019686  | 26.8465919 | 17.6098545 | 11.1501727 | 51.77723205 | 48.6493502  | 60.23484236 | Zfp879        |
| ENSMUSG00000068877  | 14.04556238  | 3.812042486  | 0.00060254 | 0.00196952 | 0.8948864  | 0.97832525 | 4.95563229 | 38.31515172 | 4.26748686  | 49.00461751 | Selenbp2      |
| ENSMUSG00000051242  | 0.365945398  | -1.45029969  | 0.00060534 | 0.00197829 | 118.125004 | 52.8295634 | 69.3788521 | 23.81752674 | 31.57940276 | 32.66974501 | Pcdh9b        |
| ENSMUSG00000032113  | 0.439635515  | -1.185620157 | 0.00060613 | 0.00198008 | 45.8229565 | 63.5911412 | 58.2286794 | 30.03079459 | 26.45841853 | 21.43957836 | Chek1         |
| ENSMUSG00000022824  | 6.551060211  | 2.711728409  | 0.00060696 | 0.00198243 | 2.68465919 | 3.91330099 | 7.43344844 | 30.03079459 | 11.94896321 | 47.98368798 | Muc13         |
| ENSMUSG00000056468  | 0.327108761  | -1.711983252 | 0.00061038 | 0.00199283 | 72.385798  | 27.393107  | 17.3471418 | 151.1895176 | 126.3176111 | 110.2603894 | S730596B20Rik |
| ENSMUSG00000108671  | 3.27242531   | 1.710360264  | 0.0006157  | 0.00200895 | 9.84375035 | 12.7182282 | 8.67235651 | 30.03079459 | 41.82137123 | 30.62788595 | 2700080J24Rik |
| ENSMUSG00000021492  | 359.0381599  | 8.487993377  | 0.00061614 | 0.00200968 | 0          | 0          | 0          | 55.91941062 | 1.706994744 | 145.992923  | F12           |
| ENSMUSG00000021414  | 0.368879318  | -1.438779191 | 0.0006388  | 0.00208081 | 60.8522749 | 45.0029614 | 40.8839664 | 17.6042589  | 14.50945622 | 22.46044969 | Fam217a       |
| ENSMUSG00000027496  | 0.443492506  | -1.173018367 | 0.00063869 | 0.00208081 | 62.6420477 | 107.615777 | 106.546094 | 45.5639642  | 40.11437648 | 36.75346313 | Aurka         |
| ENSMUSG00000021965  | 0.326776949  | -1.613621875 | 0.00064154 | 0.00208931 | 36.6903422 | 32.2847332 | 48.3174148 | 9.319901769 | 15.3625927  | 13.27208391 | Ska3          |
| ENSMUSG00000035121  | 0.353531666  | -1.500088653 | 0.00064352 | 0.00209538 | 36.6903422 | 36.1980342 | 38.4061503 | 13.46208033 | 14.50945532 | 11.23022485 | Nfil2         |
| ENSMUSG00000002588  | 0.296314388  | -1.754799413 | 0.00064467 | 0.00209871 | 62.1051158 | 278.822696 | 441.051274 | 162.5805086 | 38.40738174 | 197.0393996 | Pon1          |
| ENSMUSG00000030144  | 0.320014666  | -1.643790069 | 0.0006475  | 0.0021063  | 102.017049 | 481.336022 | 246.542706 | 93.19901769 | 78.52175822 | 93.9255169  | Clec4d        |
| ENSMUSG00000033196  | 0.265243882  | -1.914608621 | 0.00065183 | 0.00211915 | 127.968755 | 283.714322 | 66.9010359 | 67.31040167 | 32.43290013 | 27.56509735 | Myh2          |
| ENSMUSG00000037544  | 0.446917226  | -1.161920441 | 0.00065181 | 0.00211915 | 80.5397756 | 82.1793209 | 53.2730471 | 32.10188387 | 34.13989488 | 30.62788595 | Dlgap5        |
| ENSMUSG00000032591  | 12.72612532  | 3.669721329  | 0.00065401 | 0.00212502 | 3.57954558 | 1.9566505  | 0          | 19.67534818 | 7.681476348 | 46.96275845 | Mst1          |
| ENSMUSG00000        |              |              |            |            |            |            |            |             |             |             |               |

|                     |             |              |            |            |            |            |             |  |             |             |             |               |
|---------------------|-------------|--------------|------------|------------|------------|------------|-------------|--|-------------|-------------|-------------|---------------|
| ENSMUSG00000053862  | 3.063683066 | 1.61526706   | 0.0007261  | 0.00233375 | 12.5284095 | 34.2413837 | 16.1058049  |  | 71.45258023 | 50.35634495 | 71.46506721 | Slc51b        |
| ENSMUSG00000030895  | 18.56650994 | 4.214630744  | 0.00073216 | 0.00235234 | 10.7386367 | 19.566505  | 26.0170695  |  | 304.4501245 | 15.3629527  | 723.8390379 | Hpx           |
| ENSMUSG00000106054  | 0.095116866 | -3.394155005 | 0.00073315 | 0.00235507 | 6.26420477 | 23.479806  | 49.5563229  |  | 1.035544641 | 4.26748686  | 2.041859063 | Gm43623       |
| ENSMUSG00000037849  | 0.276010036 | -1.857203146 | 0.0007597  | 0.00243551 | 39.3750014 | 203.491652 | 156.1024217 |  | 37.27960708 | 40.96787385 | 31.64881548 | Ifi206        |
| ENSMUSG00000054827  | 790.8192499 | 9.627204179  | 0.00076446 | 0.00245007 |            | 0          | 0           |  | 101.4833748 | 0.853497372 | 346.0951112 | Cyp2c50       |
| ENSMUSG00000096673  | 2.374732503 | 1.247765013  | 0.00076556 | 0.00245313 | 47.428979  | 31.306408  | 21.0614372  |  | 82.84357128 | 79.37525599 | 77.5906444  | Gm340         |
| ENSMUSG00000027674  | 2.453876903 | 1.295062879  | 0.00077463 | 0.00248078 | 76.96023   | 48.9162624 | 39.6450583  |  | 164.6515979 | 86.20323457 | 158.2440774 | Pex5l         |
| ENSMUSG00000013974  | 0.249582107 | -2.002413588 | 0.00077582 | 0.0024832  | 37.5852286 | 124.247307 | 66.9010359  |  | 30.03079459 | 17.92344481 | 9.188365784 | Mccmp1        |
| ENSMUSG00000061414  | 0.394312884 | -1.342587245 | 0.00077608 | 0.00248354 | 254.147736 | 132.073909 | 92.9181054  |  | 63.1682231  | 58.03782129 | 68.40227861 | Cracr2a       |
| ENSMUSG00000075569  | 2.238919433 | 1.162802614  | 0.00077879 | 0.00249081 | 42.0596606 | 36.1980342 | 24.7781615  |  | 63.1682231  | 83.64274245 | 85.75808065 | RspH10b       |
| ENSMUSG00000034438  | 0.238253238 | -2.069432272 | 0.00079074 | 0.00252521 | 56.3778429 | 281.757672 | 65.6621278  |  | 36.24406244 | 26.45841853 | 33.69067454 | Gbp8          |
| ENSMUSG00000028979  | 6.147420071 | 2.619981072  | 0.0007935  | 0.00253306 | 5.36931837 | 7.82660199 | 2.47781615  |  | 34.17297315 | 11.94896321 | 52.06740611 | Masp2         |
| ENSMUSG00000040328  | 0.22035522  | -2.182097022 | 0.00080393 | 0.00256298 | 17.8977279 | 49.8945877 | 34.689426   |  | 8.284357128 | 4.26748686  | 10.20929532 | Olfr56        |
| ENSMUSG00000029072  | 2.32741923  | 1.218731102  | 0.0008079  | 0.00257515 | 18.7926143 | 24.4581312 | 24.7781615  |  | 49.70614277 | 54.62383181 | 53.08833564 | Tas1r3        |
| ENSMUSG00000106472  | 0.230930802 | -2.114467476 | 0.00081157 | 0.00258635 | 20.5823871 | 26.4147817 | 38.4061503  |  | 8.284357128 | 3.413989488 | 8.167436252 | Gm43111       |
| ENSMUSG00000054978  | 3.036775794 | 1.602540398  | 0.0008196  | 0.00260691 | 19.6875007 | 76.3093694 | 32.2116099  |  | 111.8388212 | 145.9480506 | 131.6999096 | Kbtbd13       |
| ENSMUSG000000107336 | 0.296864652 | -1.752122773 | 0.00082098 | 0.0026129  | 35.7954558 | 59.6778402 | 89.2013812  |  | 11.3909105  | 26.45841853 | 16.3348725  | Gm43461       |
| ENSMUSG00000045231  | 3.734598107 | 1.900952998  | 0.00082765 | 0.00263266 | 29.531251  | 14.6748787 | 4.95563229  |  | 63.1682231  | 54.62383181 | 69.42320814 | BC106179      |
| ENSMUSG00000023153  | 0.121499201 | -3.040981269 | 0.0008343  | 0.00265158 | 18.7926143 | 147.727113 | 22.3003453  |  | 12.42653569 | 2.560492116 | 8.167436252 | Tmem52        |
| ENSMUSG00000094420  | 0.211270752 | -2.242835036 | 0.00083485 | 0.00265257 | 64.4318205 | 95.8758744 | 21.0614372  |  | 12.42653569 | 19.63043956 | 6.125577189 | Igkv10-96     |
| ENSMUSG00000043939  | 0.198581726 | -2.332195226 | 0.00083696 | 0.00265826 | 17.0028415 | 79.2443451 | 56.9897713  |  | 16.56871426 | 6.827978976 | 7.146506721 | A530064D06Rik |
| ENSMUSG00000103046  | 2.758860292 | 1.464072401  | 0.00083836 | 0.00266221 | 58.1676157 | 33.2630585 | 18.5836211  |  | 81.80802664 | 102.4196846 | 122.5115438 | Gm37309       |
| ENSMUSG00000031284  | 0.475580696 | -1.072237939 | 0.00085215 | 0.00270449 | 259.517055 | 225.014807 | 382.822594  |  | 162.5805086 | 162.1645007 | 86.77901018 | PaK3          |
| ENSMUSG00000087221  | 3.265775594 | 1.707424335  | 0.00085321 | 0.00270449 | 54.5880701 | 16.6315292 | 18.5836211  |  | 88.02129449 | 128.0246058 | 79.63250346 | BC037032      |
| ENSMUSG00000026686  | 0.187234152 | -2.417084482 | 0.00085457 | 0.00271065 | 20.5823871 | 13.6965535 | 38.4061503  |  | 5.177723205 | 4.26748686  | 4.083718126 | Lmx1a         |
| ENSMUSG00000073565  | 0.273491005 | -1.87043471  | 0.000863   | 0.00273431 | 118.125004 | 67.5044422 | 73.0955763  |  | 24.85307138 | 7.681476348 | 38.7953222  | Prr16         |
| ENSMUSG00000032373  | 0.13106557  | -2.93163947  | 0.00086698 | 0.00274671 | 8.05397756 | 58.6995149 | 47.875068   |  | 6.213267846 | 1.70699474  | 7.146506721 | Car12         |
| ENSMUSG00000073834  | 0.262578179 | -1.929181068 | 0.00087795 | 0.00277803 | 179.872165 | 171.206919 | 121.412991  |  | 56.95495526 | 8.53497372  | 59.21391283 | Mup11         |
| ENSMUSG00000005107  | 0.462410461 | -1.11275406  | 0.00087824 | 0.00277844 | 68.9062524 | 57.7211897 | 70.6177601  |  | 36.24406244 | 25.6049212  | 29.60695641 | Slc2a9        |
| ENSMUSG00000047361  | 2.07494736  | 1.053074737  | 0.0008816  | 0.00278855 | 45.6392062 | 40.1113352 | 71.8566682  |  | 99.41228554 | 102.4196846 | 122.5115438 | Gm973         |
| ENSMUSG00000060600  | 0.076864581 | -3.701537234 | 0.00088404 | 0.00279574 | 130.16482  | 17749.755  | 191.63516   |  | 546.7675705 | 490.7609889 | 573.7623967 | Eno3          |
| ENSMUSG00000047759  | 0.195279006 | -2.356393237 | 0.0008991  | 0.00284019 | 29.531251  | 17.6098455 | 29.7337325  |  | 2.071089282 | 8.53497372  | 4.083718126 | Hs3st3a1      |
| ENSMUSG00000033618  | 2.635826327 | 1.398255315  | 0.00090037 | 0.00284353 | 36.6903422 | 18.5881797 | 17.344713   |  | 54.88386597 | 69.13328713 | 69.42320814 | Map3k13       |
| ENSMUSG00000044320  | 3.477407928 | 1.798012317  | 0.00090468 | 0.00285568 | 13.4232959 | 9.78325249 | 6.19454036  |  | 25.88861603 | 34.13989488 | 43.89996986 | 1700001O22Rik |
| ENSMUSG00000030178  | 0.250479752 | -1.995679822 | 0.00091668 | 0.00289088 | 24.1619327 | 35.219709  | 30.7277018  |  | 10.35544641 | 3.413989488 | 9.188365784 | Kira13-ps     |
| ENSMUSG00000058145  | 0.354151604 | -1.497561019 | 0.00091854 | 0.00289512 | 153.025574 | 55.7645392 | 109.02391   |  | 26.92416067 | 36.70038699 | 49.00461751 | Adams17       |
| ENSMUSG00000046456  | 0.257009642 | -1.959673557 | 0.00092004 | 0.00290045 | 27.393107  | 24.7781615 | 24.7781615  |  | 4.142178564 | 10.24196846 | 6.125577189 | Tmem150b      |
| ENSMUSG00000103103  | 2.535380321 | 1.342202175  | 0.00093021 | 0.00292865 | 25.0568191 | 32.2847332 | 16.1058049  |  | 50.74168741 | 60.59831341 | 76.56971486 | 4833445O7Rik  |
| ENSMUSG00000105033  | 0.341466104 | -1.550185722 | 0.00094212 | 0.00296417 | 63.5369341 | 139.900511 | 240.348166  |  | 55.91941062 | 45.23536071 | 50.02554704 | Gm43423       |
| ENSMUSG00000026163  | 2.380737808 | 1.251408744  | 0.00094611 | 0.00297481 | 28.6363647 | 27.393107  | 17.344713   |  | 68.34594631 | 51.20984232 | 57.17205377 | SpHkap        |
| ENSMUSG00000048782  | 0.305125509 | -1.712525297 | 0.00095803 | 0.00300105 | 42.954547  | 41.0896604 | 23.5392534  |  | 11.3909105  | 8.53497372  | 13.27208391 | Insc          |
| ENSMUSG00000036902  | 0.36107957  | 0.36107957   | 0.0009625  | 0.0030023  | 44.7443198 | 54.7862139 | 32.1166991  |  | 14.49762497 | 18.77694218 | 14.29301344 | Neto2         |
| ENSMUSG00000030149  | 0.404051286 | -1.30738967  | 0.00096498 | 0.00302965 | 72.485798  | 190.773423 | 151.146785  |  | 64.20376774 | 52.06333969 | 51.04647658 | Klrk1         |
| ENSMUSG00000051727  | 0.319521767 | -1.646013877 | 0.00096991 | 0.00304399 | 28.6363647 | 32.2847332 | 40.8839664  |  | 8.284357128 | 13.6559595  | 10.20929532 | Kctd14        |
| ENSMUSG00000042213  | 2.350869255 | 1.233194305  | 0.00098436 | 0.00308709 | 70.6960252 | 50.8729129 | 28.4948857  |  | 104.5900087 | 107.5406689 | 143.9510639 | Usp46         |
| ENSMUSG00000095298  | 0.462015149 | -1.113987938 | 0.00098686 | 0.00309376 | 56.3778429 | 78.260199  | 90.4402893  |  | 33.13742851 | 37.55388437 | 32.66974501 | Gm12407       |
| ENSMUSG00000046541  | 2.047802118 | 1.034076312  | 0.00099126 | 0.00310367 | 165.553983 | 105.659127 | 73.0955763  |  | 261.992794  | 236.418772  | 210.3114835 | Zfp526        |
| ENSMUSG00000059434  | 74.20681818 | 6.213479844  | 0.00099305 | 0.00311085 | 0          | 0.97832525 | 0           |  | 26.92416067 | 0           | 55.1301947  | Gckr          |
| ENSMUSG00000028017  | 0.300594748 | -1.734108293 | 0.00099363 | 0.00311209 | 43.849434  | 124.247307 | 45.839587   |  | 23.81752674 | 22.19093167 | 18.37673157 | Egf           |
| ENSMUSG00000044528  | 0.337733621 | -1.566042292 | 0.00099408 | 0.00311293 | 42.0926606 | 28.3714322 | 52.0341391  |  | 14.49762497 | 15.3629527  | 11.2302485  | Tnm11         |
| ENSMUSG00000087001  | 3.931537521 | 1.975093623  | 0.00099897 | 0.00312708 | 15.2130687 | 5.86995149 | 4.95563229  |  | 32.10188387 | 42.6748686  | 29.60695641 | Gm15475       |
| ENSMUSG00000033998  | 3.133816949 | 1.647920912  | 0.00100376 | 0.00314036 | 8.94886395 | 15.653204  | 24.7781615  |  | 63.1682231  | 51.20984232 | 37.77439267 | Kcnk1         |
| ENSMUSG00000022215  | 0.059559686 | -0.069585442 | 0.00100609 | 0.00314704 | 459.812867 | 70.6177601 | 70.6177601  |  | 11.3909105  | 5.120984232 | 16.3348725  | Fitm1         |
| ENSMUSG00000026445  | 53.94008566 | 5.753285907  | 0.00100792 | 0.00315219 | 3.57954558 | 3.91330099 | 0           |  | 127.3719908 | 2.560492116 | 280.7556212 | Cyp2d26       |
| ENSMUSG00000066443  | 14.04082128 | 3.81155542   | 0.00101046 | 0.00315898 | 0          | 0.93497575 | 1.23890807  |  | 21.74643746 | 29.87240802 | 6.125577189 | Gm10163       |
| ENSMUSG00000037016  | 0.329165811 | -1.603113597 | 0.00101477 | 0.00317186 | 81.434662  | 68.482764  | 29.7337937  |  | 20.71089282 | 21.3374343  | 17.35580204 | Frem2         |
| ENSMUSG00000110874  | 0.259988364 | -1.94348104  | 0.00101544 | 0.00317336 | 10.1136381 | 23.479806  | 27.2559776  |  | 9.319901769 | 5.974481604 | 11.23022485 | D030045P18Rik |
| ENSMUSG00000017146  | 0.338610684 | -1.5623006   | 0.00101707 | 0.0031767  | 72.485798  | 76.3093694 | 52.0341391  |  | 33.13742851 | 24.75142379 | 10.20929532 | Brc1          |
| ENSMUSG00000099759  | 0.374415315 | -1.047128648 | 0.00101874 | 0.00318074 | 60.8522749 | 49.8945877 | 39.6450583  |  | 24.85307138 | 13.6559595  | 18.37673157 | 1700030C10Rik |
| ENSMUSG00000028036  | 0.474826767 | -1.074526828 | 0.00102031 | 0.00318448 | 264.886373 | 174.141894 | 226.720177  |  | 135.656348  | 64.0123029  | 117.4068961 | Ptgrf         |
| ENSMUSG00000061068  | 0.439488248 | -1.186103508 | 0.00102432 | 0.00319641 | 210.298303 | 386.438473 | 338.221904  |  | 202.9667496 | 121.1966268 | 86.77901018 | Mcp4a         |
| ENSMUSG00000035031  | 384.332466  | 8.919853903  | 0.00102749 | 0.00320453 | 0          | 0          | 85.952052   |  | 0.853497372 | 0.853497372 | 187.8510338 | C8a           |
| ENSMUSG00000053297  | 0.262443111 | -1.464173526 | 0.00102911 | 0.00320898 | 34.9005649 | 49.8945877 | 43.3617825  |  | 12.42653569 | 20.41859063 | 20.41859063 | Alb54703      |
| ENSMUSG00000030641  | 0.274950084 | -1.862758369 | 0.00103431 | 0.00322222 | 32.2159102 | 28.3714322 | 35.9283341  |  | 9.319901769 | 12.80246058 | 4.083718126 | Ddias         |
| ENSMUSG00000009545  | 0.401816882 | -1.315389914 | 0.00104778 | 0.00326118 | 59.0625021 | 74.3527189 | 44.6006906  |  | 21.74643746 | 19.63043956 | 30.62788599 | Kcnq1         |
| ENSMUSG00000074813  | 0.4615      |              |            |            |            |            |             |  |             |             |             |               |

|                     |              |              |            |            |             |            |            |  |             |             |             |               |
|---------------------|--------------|--------------|------------|------------|-------------|------------|------------|--|-------------|-------------|-------------|---------------|
| ENSMUSG00000049721  | 0.274802756  | -1.863531621 | 0.00121853 | 0.00374244 | 29.531251   | 30.3280827 | 23.5392534 |  | 4.142178564 | 8.53497372  | 10.20929532 | Gal3st1       |
| ENSMUSG00000039814  | 0.211190834  | -2.243380871 | 0.0012229  | 0.0037545  | 17.8977279  | 25.4364565 | 16.1058049 |  | 4.142178564 | 3.413989488 | 5.104647658 | Xkr5          |
| ENSMUSG00000003379  | 3.625693631  | 1.858257023  | 0.00123431 | 0.00378816 | 17.0028415  | 22.5014807 | 34.689426  |  | 64.20376774 | 160.4575059 | 41.85811079 | Cd79a         |
| ENSMUSG00000039699  | 0.294233039  | -1.764968843 | 0.00123417 | 0.00378816 | 36.6903422  | 105.659127 | 56.9897713 |  | 26.92416067 | 20.48393693 | 11.23022485 | Batf2         |
| ENSMUSG00000064343  | 2.5088552    | 1.327029207  | 0.00123682 | 0.00379404 | 17.8977279  | 30.3280827 | 40.8839664 |  | 74.55921415 | 58.03782129 | 88.82086924 | mt-Tq         |
| ENSMUSG00000010561  | 0.324195122  | -1.625065713 | 0.0012369  | 0.00379404 | 25.068191   | 38.1546847 | 43.3617825 |  | 3.919901769 | 13.65595795 | 11.23022485 | Gm43508       |
| ENSMUSG000000110697 | 0.281148151  | -1.830597534 | 0.00124884 | 0.00382721 | 20.5823871  | 35.219709  | 39.6450583 |  | 9.319901769 | 11.09546584 | 6.125577189 | Gm31718       |
| ENSMUSG00000097216  | 2.603339025  | 1.380363202  | 0.00126011 | 0.00385964 | 34.005683   | 15.653204  | 49.5563229 |  | 83.87911592 | 85.3493732  | 86.77901018 | 4932441J04Rik |
| ENSMUSG00000096991  | 0.373788353  | -1.419706479 | 0.00126094 | 0.0038615  | 53.6931837  | 102.724151 | 149.907877 |  | 32.10188387 | 46.94235546 | 34.71160407 | Gm26789       |
| ENSMUSG00000049985  | 0.217939959  | -2.197997358 | 0.00126284 | 0.0038659  | 28.6363647  | 18.5881797 | 32.2116099 |  | 2.071089282 | 5.974481604 | 9.188365784 | Andk55        |
| ENSMUSG00000001334  | 0.271630656  | -1.880280728 | 0.0012656  | 0.00387366 | 28.6363647  | 137.94386  | 105.307186 |  | 17.6042589  | 26.45841853 | 29.60695641 | Fndc5         |
| ENSMUSG00000031444  | 0.209707571  | -2.253549147 | 0.00126685 | 0.00387677 | 78.7500028  | 248.494613 | 123.890807 |  | 23.81752674 | 6.827978976 | 64.31856049 | F10           |
| ENSMUSG00000098176  | 0.437715421  | -1.191934882 | 0.00127096 | 0.00388724 | 57.2727293  | 61.6344907 | 59.4675875 |  | 30.03079459 | 17.92344481 | 30.62788595 | Ccdc166       |
| ENSMUSG00000020641  | 5.188598368  | 2.375344866  | 0.00127512 | 0.00389857 | 309.630693  | 1321.71741 | 1661.37573 |  | 3605.76644  | 4922.972842 | 8553.347615 | Rsad2         |
| ENSMUSG00000032079  | 496.2448877  | 8.95490843   | 0.00128235 | 0.00391854 | 0           | 0          | 0          |  | 57.9904999  | 0.853497372 | 222.5626379 | Apoa5         |
| ENSMUSG00000090329  | 0.224880102  | -2.152772083 | 0.00128725 | 0.00393139 | 16.1079551  | 31.306408  | 43.3617825 |  | 4.142178564 | 5.974481604 | 10.20929532 | Gm17160       |
| ENSMUSG000000105568 | 2.048510885  | 1.034575559  | 0.00129143 | 0.00394345 | 46.5340926  | 48.9162624 | 79.2901166 |  | 111.8388212 | 100.7126899 | 142.9301344 | Gm42971       |
| ENSMUSG000000103251 | 0.278553722  | -1.8439725   | 0.00130683 | 0.00398761 | 25.9517055  | 65.5477917 | 107.785002 |  | 22.7819821  | 16.21645007 | 16.3348725  | Gm37519       |
| ENSMUSG00000035165  | 0.30702561   | -1.434302969 | 0.00130873 | 0.00399267 | 34.9005694  | 37.1763594 | 34.689426  |  | 15.53316962 | 12.80246058 | 11.23022485 | Kncn3         |
| ENSMUSG00000073405  | 0.130680023  | -2.935889484 | 0.00132526 | 0.0040373  | 11.6335231  | 27.393107  | 24.7781615 |  | 1.035544641 | 5.974481604 | 1.020929532 | H2-T-ps       |
| ENSMUSG00000078588  | 2.433463168  | 1.283010938  | 0.00133635 | 0.00406888 | 17.0028415  | 21.5231555 | 27.2559776 |  | 42.45733028 | 53.77033443 | 62.27670142 | Ccdc24        |
| ENSMUSG00000032338  | 0.136555312  | -2.872442663 | 0.00134259 | 0.00408714 | 9.84375035  | 39.1330099 | 19.8225292 |  | 1.035544641 | 5.120984232 | 3.062788595 | Hcn4          |
| ENSMUSG00000038155  | 0.316341927  | -1.660443318 | 0.00134308 | 0.0040879  | 70.6962052  | 223.058157 | 69.3788521 |  | 34.17297315 | 46.94235546 | 33.69067454 | Gstp2         |
| ENSMUSG00000024863  | 73.14682812  | 6.192723401  | 0.00135185 | 0.00411311 | 0.8948864   | 0          | 0          |  | 15.53316962 | 0           | 65.33949002 | Mbl2          |
| ENSMUSG000000107638 | 3.809031307  | 1.929424146  | 0.00135373 | 0.00411808 | 8.05397756  | 6.84827674 | 3.71672422 |  | 24.85307138 | 23.04442904 | 24.50230876 | Gm30524       |
| ENSMUSG00000053101  | 0.398558686  | -1.327135925 | 0.00135424 | 0.00411816 | 59.0625021  | 99.7891754 | 80.5290247 |  | 37.27960708 | 18.77694218 | 39.81625173 | Gpr141        |
| ENSMUSG00000034348  | 0.143438006  | -2.801500758 | 0.00136953 | 0.00415793 | 26.8465915  | 11.739903  | 16.1058049 |  | 3.106633923 | 0.853497372 | 4.083718126 | Ppp3213A10Rik |
| ENSMUSG00000097136  | 0.303366044  | -1.720868481 | 0.00137398 | 0.00417011 | 29.531251   | 74.3527189 | 100.351554 |  | 15.53316962 | 19.63043956 | 26.54416782 | Gm26772       |
| ENSMUSG00000081214  | 3.753132682  | 1.908095294  | 0.00138819 | 0.00421083 | 7.15909116  | 29.3497575 | 23.592534  |  | 102.5189195 | 83.64274245 | 37.77439267 | Rpl35a-ps2    |
| ENSMUSG000000102437 | 3.602776804  | 1.849109278  | 0.00140059 | 0.00424463 | 8.05397756  | 15.653204  | 8.67235651 |  | 21.74643746 | 52.06333969 | 42.87904032 | Gm38048       |
| ENSMUSG00000029770  | 0.254339254  | -1.975173956 | 0.00141393 | 0.004282   | 26.8465919  | 68.4827674 | 112.740635 |  | 9.319901769 | 24.75142379 | 18.37673157 | Gm26742       |
| ENSMUSG000000028817 | 29.09761684  | 4.862829093  | 0.00141442 | 0.00428204 | 7.15909116  | 3.91330099 | 1.23890807 |  | 93.19901769 | 2.560492116 | 266.4626077 | Fetub         |
| ENSMUSG00000045441  | 0.399460125  | -1.323876598 | 0.00141845 | 0.00429415 | 123.494323  | 86.0926219 | 90.4402893 |  | 36.24406244 | 23.04442904 | 61.25577189 | Gprin3        |
| ENSMUSG00000050299  | 2.31927174   | 1.213671865  | 0.00142443 | 0.00431072 | 75.7954558  | 76.3093694 | 70.6176601 |  | 159.4738747 | 166.4319875 | 95.96737596 | Gm9843        |
| ENSMUSG00000037833  | 0.4955274    | -0.102963262 | 0.00143595 | 0.00434325 | 71.5909116  | 67.0709471 | 68.139944  |  | 38.31515172 | 30.72590539 | 43.8996986  | Shd24b        |
| ENSMUSG00000021751  | 26.78339303  | 4.743266833  | 0.0014547  | 0.0043929  | 0.8948864   | 1.9566505  | 1.23890807 |  | 23.81752674 | 0           | 85.75808065 | Acox2         |
| ENSMUSG00000083822  | 0.098578557  | -3.342582327 | 0.00147506 | 0.00444882 | 8.05397756  | 40.1113352 | 30.7727018 |  | 0           | 1.706994744 | 6.125577189 | Hmgbl-ps5     |
| ENSMUSG00000085501  | 0.212862672  | -2.232005118 | 0.00148741 | 0.00448289 | 12.5284095  | 33.2630585 | 54.5119552 |  | 6.213267846 | 6.827978976 | 8.167436252 | Gm11772       |
| ENSMUSG00000031173  | 344.9386839  | 8.430196122  | 0.00149229 | 0.00449581 | 0           | 0          | 0          |  | 55.91941062 | 0.853497372 | 138.8464163 | Otc           |
| ENSMUSG00000046856  | 0.327565229  | -1.610145873 | 0.00149509 | 0.00450281 | 34.005683   | 25.4364565 | 32.2116099 |  | 12.42653569 | 8.53497372  | 9.188365784 | Gpr1          |
| ENSMUSG00000063296  | 2.913246678  | 1.542627866  | 0.00151289 | 0.0045532  | 17.0028415  | 75.3310441 | 38.4061623 |  | 137.7274373 | 120.3431294 | 122.515438  | Tmem117       |
| ENSMUSG00000097625  | 4.165618723  | 2.058530796  | 0.00153967 | 0.00462803 | 4.747443198 | 6.84827674 | 3.71672422 |  | 19.67534818 | 23.04442904 | 20.41859063 | Gm26561       |
| ENSMUSG00000048852  | 0.276254476  | -1.855930253 | 0.00154496 | 0.00464312 | 42.0596606  | 134.030559 | 42.1228745 |  | 24.85307138 | 22.19093167 | 13.27208391 | Gm12185       |
| ENSMUSG00000026390  | 0.051729461  | -4.272870031 | 0.00155309 | 0.00466589 | 1.78977279  | 55.7645392 | 19.8225292 |  | 2.071089282 | 0           | 2.041859063 | Marco         |
| ENSMUSG00000051969  | 0.086264798  | -0.086264798 | 0.00155525 | 0.00467071 | 24.1619327  | 28.3714322 | 3.71672422 |  | 1.035544641 | 0.853497372 | 3.062788595 | Tlrl1         |
| ENSMUSG00000087594  | 2.588442206  | 1.372084107  | 0.00155791 | 0.00467788 | 17.8977279  | 20.5448302 | 12.3890807 |  | 35.20851779 | 50.35634495 | 46.96275845 | BC039771      |
| ENSMUSG00000041046  | 0.1986392    | -2.331777738 | 0.00155859 | 0.00467889 | 16.1079551  | 39.1330099 | 29.7337937 |  | 7.248812487 | 1.706994744 | 8.167436252 | Ramp3         |
| ENSMUSG000000232221 | 0.362222973  | -1.465042079 | 0.00157032 | 0.00471014 | 51.9034109  | 65.5477917 | 32.2116099 |  | 19.67534818 | 21.33774343 | 13.27208391 | Mns1          |
| ENSMUSG00000022322  | 0.341602876  | -1.549607974 | 0.00157261 | 0.00471616 | 68.9062524  | 82.1793209 | 34.689426  |  | 27.95970531 | 13.65595795 | 22.46044969 | Shcbp1        |
| ENSMUSG00000056508  | 2.530497955  | 1.339421308  | 0.00158454 | 0.00475026 | 17.8977279  | 12.7182282 | 21.0614372 |  | 47.63505349 | 37.55388437 | 44.9208939  | L700001K19Rik |
| ENSMUSG00000102329  | 0.211382819  | -2.242069975 | 0.00159003 | 0.00476165 | 34.005683   | 11.739903  | 30.9727018 |  | 5.177723205 | 6.827978976 | 4.083718126 | Gm10851       |
| ENSMUSG00000079056  | 0.483891631  | -1.047244106 | 0.0015953  | 0.0047766  | 85.909094   | 84.1359714 | 87.9624732 |  | 39.35069636 | 29.87240802 | 56.15112423 | Kncip3        |
| ENSMUSG000000111000 | 5.33832788   | 2.416386813  | 0.00159593 | 0.00477768 | 2.64320477  | 3.91330099 | 1.23890807 |  | 24.85307138 | 23.89792642 | 14.29301344 | Gm47108       |
| ENSMUSG00000052920  | 2.198483275  | 1.136508557  | 0.00160191 | 0.00479299 | 555.724452  | 273.93107  | 178.402762 |  | 780.8006593 | 744.2497084 | 695.253011  | Prgk1         |
| ENSMUSG00000015452  | 0.472034985  | -0.472034985 | 0.00160295 | 0.00479442 | 51.9034109  | 68.4827674 | 78.0512086 |  | 27.95970531 | 31.57940276 | 33.69067454 | Ager          |
| ENSMUSG00000102277  | 0.178253372  | -2.487998726 | 0.00163818 | 0.00489027 | 12.5284095  | 46.9596119 | 96.6348297 |  | 10.35544641 | 4.26748686  | 13.27208391 | A130050007Rik |
| ENSMUSG00000034768  | 0.17920183   | -2.480342725 | 0.00164939 | 0.00491941 | 22.3721599  | 207.404953 | 37.1672422 |  | 20.71089282 | 11.94896321 | 15.31394297 | Asb16         |
| ENSMUSG00000022818  | 0.270528244  | -1.886148871 | 0.00165388 | 0.00493106 | 19.6875047  | 22.5014807 | 26.0170695 |  | 6.213267846 | 5.120984232 | 7.146506721 | Cyp2ab1       |
| ENSMUSG00000042724  | 0.33149129   | -1.592957131 | 0.00165572 | 0.00493568 | 33.1107966  | 47.9379372 | 42.9488557 |  | 14.49762497 | 13.65595795 | 8.167436252 | Map3k9        |
| ENSMUSG00000057346  | 0.332851763  | -1.587048285 | 0.00165603 | 0.00493575 | 39.3750014  | 120.334006 | 125.129715 |  | 30.0709459  | 23.89792642 | 40.83718126 | Apol9a        |
| ENSMUSG00000030834  | 4.805164039  | 2.264585683  | 0.00165747 | 0.00493916 | 11.6335231  | 6.84827674 | 8.67235651 |  | 34.17297315 | 15.3629527  | 81.67436252 | Abcc6         |
| ENSMUSG00000107608  | 0.4015440145 | 2.005558135  | 0.00166037 | 0.00494692 | 6.26420477  | 9.78325249 | 2.47781615 |  | 26.92416067 | 25.60492116 | 23.48137923 | Gm33863       |
| ENSMUSG00000039748  | 0.221664135  | -2.173552735 | 0.00166925 | 0.00496988 | 25.068191   | 39.1330099 | 16.1058049 |  | 4.142178564 | 9.388471092 | 4.083718126 | Exo1          |
| ENSMUSG00000036523  | 0.299313207  | -1.740272157 | 0.00167035 | 0.00497097 | 162.869324  | 225.014807 | 142.474428 |  | 38.31515172 | 102.4196846 | 17.35580204 | Greb1         |
| ENSMUSG00000031756  | 0.352330039  | -1.505000613 | 0.00167167 | 0.00497359 | 64.4318205  | 73.3743936 | 30.9727018 |  | 24.85307138 | 19.63043956 | 15.31394297 | Cempn         |
| ENSMUSG00000095597  | 2.49243      |              |            |            |             |            |            |  |             |             |             |               |

|                     |             |              |            |             |            |            |            |             |             |             |               |
|---------------------|-------------|--------------|------------|-------------|------------|------------|------------|-------------|-------------|-------------|---------------|
| ENSMUSG00000105282  | 0.330202554 | -1.598576818 | 0.00182375 | 0.00536854  | 38.480115  | 127.182282 | 136.279888 | 24.85307138 | 36.70038699 | 37.77439267 | Gm42981       |
| ENSMUSG00000044667  | 0.345784229 | -1.532056026 | 0.00182887 | 0.00538173  | 25.0568191 | 43.0463109 | 52.0341391 | 13.46208033 | 14.50945532 | 13.27208391 | Plppr4        |
| ENSMUSG00000055775  | 0.05611379  | -4.155500828 | 0.00184001 | 0.00541359  | 106.491481 | 374.69857  | 376.628054 | 43.49287492 | 1.706994744 | 3.062788595 | Myh8          |
| ENSMUSG000000105383 | 2.297762664 | -1.200229789 | 0.00184614 | 0.00542378  | 46.5340926 | 40.1113352 | 19.8225292 | 96.30565161 | 77.66826085 | 73.50692627 | Gm42641       |
| ENSMUSG00000078234  | 0.400782289 | -1.31910934  | 0.00185767 | 0.00545796  | 537.826724 | 176.098545 | 263.887419 | 158.4383301 | 86.20323457 | 148.0347821 | Khldc7a       |
| ENSMUSG00000050777  | 0.375972705 | -1.411300166 | 0.00185983 | 0.00546336  | 49.2187517 | 110.550753 | 99.1126458 | 34.17297315 | 20.48393693 | 42.87904032 | Tmem37        |
| ENSMUSG00000085636  | 0.300523759 | -1.734449041 | 0.00186237 | 0.0054689   | 22.3721599 | 28.3714322 | 49.5563229 | 9.319901769 | 9.388471092 | 11.23022485 | Gm11769       |
| ENSMUSG00000045180  | 0.461121771 | -1.116780314 | 0.00187496 | 0.00550302  | 161.974438 | 138.922185 | 99.1126458 | 73.52366951 | 37.55388437 | 74.5278558  | Shroom2       |
| ENSMUSG00000021880  | 0.408595744 | -1.29125392  | 0.00189155 | 0.00554787  | 49.2187517 | 110.550753 | 100.351554 | 37.27960708 | 40.96787385 | 27.56509735 | Rnase6        |
| ENSMUSG00000104235  | 4.352543521 | 2.121858724  | 0.00189229 | 0.00554908  | 16.1079551 | 4.89162624 | 3.71672422 | 26.92416067 | 51.20984232 | 31.64881548 | Gm37589       |
| ENSMUSG00000102953  | 2.351564671 | 1.233621008  | 0.00189687 | 0.005556059 | 30.4261374 | 18.5881797 | 17.344713  | 49.70614277 | 53.77033443 | 54.10926517 | Gm37019       |
| ENSMUSG00000061947  | 61.20202305 | 5.935507437  | 0.0018973  | 0.00556088  | 0.8948864  | 0          | 0          | 21.74643746 | 0           | 45.94182892 | Serpina10     |
| ENSMUSG00000097075  | 0.331484475 | -1.592986793 | 0.00190789 | 0.00558708  | 42.0596606 | 34.2413837 | 29.7337937 | 14.49762497 | 6.827978976 | 14.29301344 | D83004416Rik  |
| ENSMUSG00000016526  | 4.677491222 | 2.225734946  | 0.00191844 | 0.00561411  | 5.36931837 | 4.89162624 | 3.71672422 | 14.49762497 | 17.92344481 | 33.69067454 | Dyrk3         |
| ENSMUSG00000106543  | 0.11155087  | -3.164226328 | 0.00192082 | 0.00561913  | 4.47443198 | 19.566505  | 44.6006906 | 2.071089282 | 3.413989488 | 2.041859063 | Gm43378       |
| ENSMUSG00000085095  | 0.237199522 | -2.075826992 | 0.00193512 | 0.00565643  | 69.8011388 | 45.9812867 | 16.1058049 | 12.42653569 | 5.974481604 | 13.27208391 | Gm15635       |
| ENSMUSG00000002769  | 16.74048705 | 4.065269597  | 0.00194508 | 0.00565842  | 11.6335231 | 13.6965535 | 11.1501727 | 133.5852587 | 6.827978976 | 470.648514  | Gmmt          |
| ENSMUSG00000054459  | 0.420491016 | -1.249853117 | 0.00197275 | 0.00576009  | 48.3238654 | 42.0679857 | 58.2286794 | 24.85307138 | 15.3629527  | 22.46044969 | Vsn11         |
| ENSMUSG00000031262  | 0.414541542 | -1.270411411 | 0.00197954 | 0.00577793  | 52.7982973 | 45.0029614 | 73.0955763 | 16.56871426 | 28.16541327 | 25.52323829 | Cenpi         |
| ENSMUSG00000040287  | 0.142789101 | -2.808042231 | 0.00197942 | 0.00577793  | 110.965913 | 726.89566  | 116.457359 | 59.02604454 | 32.43290013 | 44.92089939 | Stac3         |
| ENSMUSG00000027895  | 7.871977778 | 2.976726148  | 0.00199685 | 0.00581843  | 21.4772735 | 181.968496 | 23.5392534 | 665.8552042 | 497.5889679 | 624.8088733 | Kcnc4         |
| ENSMUSG00000034573  | 0.448237189 | -1.157665744 | 0.0020025  | 0.00583287  | 578.991498 | 270.017769 | 210.614372 | 161.544964  | 135.7060821 | 178.662668  | Ptpn13        |
| ENSMUSG00000027261  | 64.80237492 | 6.017974782  | 0.00200721 | 0.00584559  | 0          | 0          | 1.23890807 | 13.46208033 | 0           | 58.1929833  | Hao1          |
| ENSMUSG00000007761  | 2.504129334 | 1.324309077  | 0.00201244 | 0.0058558   | 24.1619327 | 18.5881797 | 18.5836211 | 48.67059813 | 37.55388437 | 68.40227861 | Syngtr3       |
| ENSMUSG00000105112  | 3.376115572 | 1.755364292  | 0.00201214 | 0.0058558   | 46.5340926 | 14.6748787 | 9.91126458 | 82.84357128 | 93.88471092 | 66.36041955 | Gm42778       |
| ENSMUSG00000099773  | 0.267286208 | -1.903542698 | 0.00202478 | 0.00588764  | 16.1079551 | 36.1980342 | 40.8839664 | 6.213267846 | 10.24196846 | 8.167436252 | Hmgbl-rs16    |
| ENSMUSG00000022429  | 2.164519059 | 1.114046504  | 0.0020362  | 0.00591577  | 23.2670463 | 26.4147817 | 34.689426  | 56.95495526 | 52.91683706 | 71.46506721 | Dmc1          |
| ENSMUSG00000088549  | 0.242017101 | -2.046819105 | 0.00203693 | 0.00591687  | 17.0028415 | 44.0246362 | 60.7064956 | 10.35544641 | 13.65595795 | 5.104647658 | Gm24959       |
| ENSMUSG00000018570  | 0.341621206 | -1.549530563 | 0.00203939 | 0.00592302  | 39.3750014 | 26.4147817 | 59.4675875 | 16.56871426 | 12.80246058 | 13.27208391 | 2810408A11Rik |
| ENSMUSG00000027955  | 3.232669193 | 1.692725881  | 0.00204194 | 0.00592838  | 9.84375035 | 13.6965535 | 8.67235651 | 49.70614277 | 31.57940276 | 23.48137923 | Tmsbl15l      |
| ENSMUSG00000052212  | 0.199120324 | -2.328287614 | 0.00209393 | 0.0060608   | 24.1619327 | 90.0059229 | 17.344713  | 7.248812487 | 6.827978976 | 12.25115438 | Cd77          |
| ENSMUSG00000018893  | 0.304644004 | -4.518072726 | 0.00211541 | 0.0061113   | 205.823871 | 3531.75415 | 723.522314 | 165.6871426 | 7.681479364 | 21.43952016 | Mbt           |
| ENSMUSG00000030041  | 0.332676399 | -1.587808575 | 0.00213471 | 0.00616285  | 33.1107966 | 53.8078887 | 58.2286794 | 16.56871426 | 23.04442904 | 8.167436252 | M1ap          |
| ENSMUSG00000097467  | 0.176981228 | -2.498331747 | 0.00213884 | 0.00617315  | 17.8977279 | 16.6315292 | 26.0170695 | 1.035544641 | 2.560492116 | 7.146506721 | Gm26737       |
| ENSMUSG000000105096 | 0.185657237 | -2.429286538 | 0.00215543 | 0.00621687  | 17.0028415 | 77.2876946 | 22.3003435 | 3.106633923 | 10.24196846 | 8.167436252 | Gbp10         |
| ENSMUSG00000105224  | 0.315221675 | -1.665561356 | 0.00215703 | 0.00621987  | 37.5852286 | 81.2009956 | 157.341325 | 22.7819821  | 28.16541327 | 35.7325336  | Gm3364        |
| ENSMUSG00000029797  | 0.301222025 | -1.731100833 | 0.00215748 | 0.00622012  | 62.6420277 | 31.306408  | 24.7316048 | 14.49762497 | 9.388471092 | 12.25115438 | Sspo          |
| ENSMUSG00000050541  | 2.316018011 | 1.211646473  | 0.00216985 | 0.00625152  | 29.531251  | 30.3280827 | 30.9727018 | 75.59475879 | 44.38186334 | 90.86272831 | Adra1b        |
| ENSMUSG00000097295  | 0.317206774 | -1.665054513 | 0.00217321 | 0.00625907  | 31.3210238 | 121.312331 | 131.324256 | 32.10188387 | 28.16541327 | 29.60695641 | Hmgbl-ps8     |
| ENSMUSG00000048826  | 0.463912788 | -1.108074481 | 0.00217601 | 0.0062605   | 81.434662  | 87.0709471 | 78.0512086 | 54.88386597 | 26.45841853 | 33.69067454 | Dactb1        |
| ENSMUSG00000087632  | 0.361240291 | -1.46896928  | 0.00218347 | 0.00628435  | 36.6903422 | 88.0492724 | 10.262818  | 30.03079459 | 23.04442904 | 31.64881548 | Gm6058        |
| ENSMUSG00000031637  | 0.254781833 | -1.972665683 | 0.00218432 | 0.00628573  | 29.531251  | 109.572428 | 30.9727018 | 11.39099105 | 13.65595795 | 18.37673157 | Lrp2bp        |
| ENSMUSG00000096010  | 4.535220441 | 2.181172677  | 0.00218889 | 0.00629779  | 3.57954558 | 2.93497575 | 9.91126458 | 23.81752674 | 30.72590539 | 17.35580204 | Hist4ta       |
| ENSMUSG00000089317  | 2.750624361 | 1.459759132  | 0.00219207 | 0.00630588  | 17.0028415 | 10.7615777 | 13.6729888 | 43.49287492 | 28.16541327 | 42.87904032 | Snord123      |
| ENSMUSG00000109644  | 0.095237139 | 2.033596777  | 0.00220198 | 0.00633222  | 18.7926143 | 7.82660199 | 4.95563229 | 43.49287492 | 23.04442904 | 65.33949002 | G160005C13Rik |
| ENSMUSG00000036960  | 0.237326433 | -2.075055302 | 0.00220306 | 0.00633425  | 30.4261374 | 17.6098545 | 17.344713  | 6.213267846 | 3.413989488 | 6.125577189 | Cla2          |
| ENSMUSG00000091405  | 3.35913368  | 1.74808921   | 0.0022048  | 0.0063382   | 25.0568191 | 7.82660199 | 9.91126458 | 45.5639642  | 64.0123029  | 35.7325336  | Hist2h4       |
| ENSMUSG00000044461  | 0.350698624 | -1.511696323 | 0.00221487 | 0.00636605  | 110.071027 | 207.404953 | 58.2286794 | 59.02604454 | 32.43290013 | 40.83718126 | Shisa2        |
| ENSMUSG00000034450  | 11.12251943 | 3.475411714  | 0.00221901 | 0.00637687  | 3.57954558 | 2.93497575 | 1.23890807 | 42.45733028 | 1.706994744 | 43.89969864 | Gulo          |
| ENSMUSG00000030703  | 0.457693187 | -1.127547278 | 0.00222432 | 0.00639195  | 66.2215933 | 63.5911412 | 66.9010359 | 38.31515172 | 19.63043956 | 32.66974501 | Gdpd3         |
| ENSMUSG00000025380  | 5.407157064 | 2.434870264  | 0.00222494 | 0.00639175  | 4.47443198 | 3.91330099 | 1.23890807 | 12.42653569 | 18.77694218 | 22.46044969 | Fscn2         |
| ENSMUSG00000004709  | 0.448574746 | -1.156579695 | 0.0022429  | 0.00643613  | 33.5369341 | 117.39903  | 65.6621278 | 41.42178564 | 36.70038699 | 32.66974501 | Cd24a         |
| ENSMUSG00000043155  | 2.816189997 | 1.49374467   | 0.00224305 | 0.00643613  | 9.84375035 | 16.6315292 | 11.1501727 | 40.386241   | 28.16541327 | 37.74392747 | Hpd1          |
| ENSMUSG00000047216  | 0.326216715 | -1.616097388 | 0.00225155 | 0.00645834  | 325.738648 | 144.792137 | 16.0791974 | 81.80802664 | 29.87240802 | 72.48596674 | Cdh19         |
| ENSMUSG00000096336  | 0.148077927 | -2.755571492 | 0.00225416 | 0.00646474  | 48.3238654 | 62.6128159 | 16.1581849 | 0           | 8.53497372  | 10.20929532 | Igkv1-135     |
| ENSMUSG00000028020  | 0.2457441   | -2.024771315 | 0.00225676 | 0.00646891  | 34.9005694 | 13.6965535 | 49.5563229 | 9.319901769 | 8.53497372  | 6.125577189 | Glr3          |
| ENSMUSG00000091994  | 2.082266209 | 1.058154523  | 0.00225809 | 0.00647161  | 52.7982973 | 36.1980342 | 28.9438873 | 78.70139272 | 73.40077399 | 94.94644643 | E130317F20Rik |
| ENSMUSG00000102022  | 2.145220973 | 1.250220973  | 0.00227441 | 0.006451397 | 20.5823871 | 25.4364565 | 29.7337937 | 48.67059813 | 56.33082655 | 56.15112423 | Gm33280       |
| ENSMUSG00000085779  | 0.307382866 | 1.361983269  | 0.0023075  | 0.00659871  | 60.8522749 | 231.863084 | 132.890807 | 252.6728924 | 343.1059435 | 474.7323232 | Atcyas        |
| ENSMUSG00000047638  | 0.303760879 | -1.701994546 | 0.00230881 | 0.00660132  | 78.2982973 | 40.1113352 | 34.689426  | 10.35544641 | 16.56871426 | 22.46044969 | Nrlh4         |
| ENSMUSG00000108132  | 4.142468613 | 2.050490766  | 0.00232452 | 0.00663952  | 5.36931837 | 12.7182282 | 2.47781615 | 22.7819821  | 34.13989488 | 29.60695641 | Gm44175       |
| ENSMUSG00000025163  | 2.578078702 | 1.366296306  | 0.00234647 | 0.00669882  | 16.1079551 | 38.1546847 | 23.5392534 | 84.91466056 | 49.50284757 | 66.36041955 | Cd7           |
| ENSMUSG00000073785  | 6.931073714 | 2.793071285  | 0.00236393 | 0.00674641  | 7.15909116 | 1.9566505  | 0          | 15.53316962 | 27.3119159  | 23.48137923 | Krtap5-5      |
| ENSMUSG00000104867  | 0.160203098 | -2.64202605  | 0.00236503 | 0.00674841  | 8.05397756 | 25.4364565 | 50.795231  | 6.213267846 | 5.120984232 | 2.041859063 | Gm43728       |
| ENSMUSG00000079434  | 2.334244658 | 1.222955782  | 0.00237001 | 0.00675921  | 25.0568191 | 54.7862139 | 27.2559776 | 76.63030344 | 75.10776873 | 99.03016456 | Neu2          |
| ENSMUSG000000021364 | 188.8199754 | 7.560867586  | 0.00238985 | 0.0068112   | 0.8948864  | 0          | 1.23890807 | 131.5141694 | 0           | 265.4416782 | Elovl2        |
| ENSMUSG0000002      |             |              |            |             |            |            |            |             |             |             |               |

|                     |              |              |            |            |            |            |            |             |             |             |               |
|---------------------|--------------|--------------|------------|------------|------------|------------|------------|-------------|-------------|-------------|---------------|
| ENSMUSG00000106732  | 0.302532991  | -1.72483562  | 0.00279367 | 0.0078135  | 23.2670463 | 60.6561654 | 79.2901166 | 11.39099105 | 22.19093167 | 15.31394297 | Gm43792       |
| ENSMUSG00000039021  | 3.984146094  | 1.99427055   | 0.0027945  | 0.00781454 | 11.6335231 | 5.86995149 | 2.47781615 | 33.13742851 | 27.3119159  | 21.43952016 | Ttc16         |
| ENSMUSG00000029683  | 0.072958435  | -3.776781406 | 0.00280188 | 0.00783258 | 35.7954558 | 358.067041 | 126.368623 | 30.03079459 | 5.974481604 | 2.041859063 | Lmod2         |
| ENSMUSG00000045349  | 0.27878811   | -1.842759061 | 0.00281313 | 0.00785886 | 24.1619327 | 25.4364565 | 35.9283341 | 3.106633923 | 10.24196846 | 10.20929532 | Shz2d5        |
| ENSMUSG00000069922  | 777.8506796  | 9.603349424  | 0.00281589 | 0.00786524 | 0          | 0.97832525 | 0          | 250.6018031 | 0           | 608.4740008 | Ces3a         |
| ENSMUSG00000107350  | 3.091412206  | 1.628266035  | 0.00284505 | 0.00793022 | 9.84375035 | 7.82660199 | 7.43344844 | 22.7819821  | 24.75142379 | 30.62788595 | Gm19610       |
| ENSMUSG00000026669  | 0.377382162  | -1.405901862 | 0.00286052 | 0.00798202 | 46.5340926 | 53.8078887 | 60.7064956 | 15.53316962 | 12.80246058 | 32.66974501 | Mcm10         |
| ENSMUSG00000037942  | 29.86484112  | 4.900376142  | 0.00289577 | 0.00807109 | 0.8948864  | 1.9566505  | 0          | 20.71089282 | 0           | 67.38134908 | Crp           |
| ENSMUSG00000039653  | 25.5137833   | 4.673204939  | 0.00289972 | 0.00808705 | 0.8948864  | 0.97832525 | 1.23890807 | 16.56871426 | 0           | 62.27670142 | Baat          |
| ENSMUSG00000027077  | 0.091133976  | -3.455867173 | 0.00294107 | 0.00817985 | 7.15909116 | 135.008884 | 11.1501727 | 10.35544641 | 1.706994744 | 2.041859063 | Smtml1        |
| ENSMUSG00000106720  | 0.221779337  | -2.17280314  | 0.00294659 | 0.00819383 | 13.4232959 | 21.5231555 | 35.9283341 | 4.142178564 | 3.413989488 | 8.167436252 | Gm43795       |
| ENSMUSG00000046593  | 7.001331373  | 2.807629291  | 0.00296175 | 0.00823196 | 0.8948864  | 2.93497575 | 4.95563229 | 36.24406244 | 11.09546584 | 12.25115438 | Tmem215       |
| ENSMUSG00000000409  | 0.466016235  | -1.101547878 | 0.00300883 | 0.00835457 | 75.1704572 | 162.401991 | 136.279888 | 54.88386597 | 71.69377925 | 46.96275845 | Lck           |
| ENSMUSG00000075410  | 0.360503946  | -1.471913043 | 0.00301145 | 0.00836047 | 71.5909116 | 45.0029614 | 83.0068409 | 39.35069636 | 14.50945532 | 18.37673157 | Prcd          |
| ENSMUSG00000109268  | 0.191207395  | -2.386789773 | 0.00301248 | 0.00836196 | 12.5284095 | 16.6315292 | 40.8839664 | 2.071089282 | 5.974481604 | 5.104647658 | 9530078K11Rik |
| ENSMUSG00000087500  | 2.795136114  | 1.482918539  | 0.00301937 | 0.00837972 | 16.709551  | 10.7615777 | 11.1501727 | 24.85307138 | 40.11437648 | 41.85811079 | Gm12426       |
| ENSMUSG00000029828  | 2.174112628  | 1.12042668   | 0.00306437 | 0.00849209 | 17.8977279 | 26.4147817 | 29.7337937 | 57.9904999  | 48.6493502  | 53.08833564 | 4921507P07Rik |
| ENSMUSG00000081487  | 0.390716974  | -1.355804163 | 0.00306944 | 0.00850335 | 48.3238654 | 72.3960684 | 122.651899 | 23.81752674 | 29.01891065 | 41.85811079 | Gm13689       |
| ENSMUSG00000031504  | 0.366885717  | -1.446597354 | 0.00307391 | 0.00851433 | 45.6392062 | 145.770462 | 91.6791974 | 23.81752674 | 40.96787385 | 38.7953222  | Rab20         |
| ENSMUSG00000104324  | 2.622565227  | 1.390978655  | 0.00310133 | 0.00858608 | 16.1079551 | 22.5014807 | 16.1058049 | 28.99524995 | 56.33082655 | 58.1929833  | Gm37320       |
| ENSMUSG00000020411  | 1.225129386  | 1.08755068   | 0.00311003 | 0.00860593 | 26.8465919 | 33.2630585 | 23.5392534 | 54.88386597 | 50.35634495 | 73.50692627 | Nipal4        |
| ENSMUSG00000031530  | 0.386439676  | -1.371684871 | 0.00312524 | 0.00863814 | 144.07671  | 51.8512382 | 66.9010359 | 37.27960708 | 29.01891065 | 35.7325336  | Dusp4         |
| ENSMUSG00000032422  | 0.348491624  | -1.520804113 | 0.00312485 | 0.00863814 | 74.2755708 | 34.2413837 | 66.9010359 | 31.06633923 | 17.92344481 | 12.25115438 | Clstn2        |
| ENSMUSG00000097222  | 0.271789704  | 1.305618653  | 0.00314383 | 0.00865828 | 57.2727293 | 39.1330099 | 17.344713  | 75.59475879 | 103.273182  | 105.1557417 | 1010001N08Rik |
| ENSMUSG00000097350  | 2.14515314   | 1.101080644  | 0.00314638 | 0.00869091 | 35.7954558 | 37.1763594 | 34.689426  | 48.67059813 | 92.17771617 | 89.84179877 | 4732491K20Rik |
| ENSMUSG00000053030  | 0.254030525  | -1.976926228 | 0.00315376 | 0.00870987 | 21.4772735 | 18.5881797 | 16.1058049 | 4.142178564 | 5.974481604 | 4.083718126 | Spink2        |
| ENSMUSG00000067389  | 2.145483923  | 1.10130309   | 0.00315999 | 0.00872422 | 49.2187517 | 25.4364565 | 32.2116099 | 62.13267846 | 85.3497372  | 82.69529055 | Gm17080       |
| ENSMUSG00000086451  | 0.421823866  | -1.245287372 | 0.00315956 | 0.00872422 | 59.0625021 | 40.1113352 | 56.9897713 | 30.03079459 | 19.63043956 | 16.3348725  | 4933431K23Rik |
| ENSMUSG00000097194  | 0.342833862  | -1.544418483 | 0.00320522 | 0.00883758 | 34.9005694 | 79.2443451 | 48.3174148 | 10.35544641 | 25.60492116 | 19.3976611  | 9330175E14Rik |
| ENSMUSG00000091955  | 0.309195662  | -1.693408016 | 0.00321974 | 0.00887472 | 22.3721599 | 35.219709  | 34.689426  | 10.35544641 | 5.120984232 | 13.27208391 | Gm9844        |
| ENSMUSG00000024411  | 0.084116174  | -3.57147296  | 0.00322338 | 0.00888331 | 8.05397756 | 70.4394147 | 3.71672422 | 3.106633923 | 0.853497372 | 3.062788595 | Aqp4          |
| ENSMUSG00000087294  | 0.1652887447 | -2.594334787 | 0.00323809 | 0.0089224  | 6.26420477 | 50.2413837 | 50.7952531 | 4.142178564 | 7.681476348 | 3.062788595 | Gm13556       |
| ENSMUSG00000085645  | 2.622447292  | 1.390913777  | 0.0032547  | 0.00896525 | 38.480115  | 12.7182282 | 19.8225292 | 69.38149095 | 63.15880553 | 55.1301947  | Hoxb5os       |
| ENSMUSG00000097352  | 0.31831395   | -1.651477712 | 0.00326066 | 0.00898022 | 36.6903422 | 41.0896604 | 28.4948857 | 11.39099105 | 17.06994744 | 5.104647658 | C920009B18Rik |
| ENSMUSG00000047631  | 14.81488672  | 3.88897569   | 0.00326801 | 0.00899897 | 0          | 6.84827674 | 2.47781615 | 31.06633923 | 17.06994744 | 105.1557417 | Apof          |
| ENSMUSG00000035964  | 0.235085019  | -2.088745489 | 0.00327484 | 0.00901339 | 16.709551  | 15.653204  | 33.450518  | 4.142178564 | 6.827978976 | 4.083718126 | Tmem59l       |
| ENSMUSG00000039620  | 0.26160504   | 1.043767969  | 0.00327468 | 0.00901339 | 64.4318205 | 42.0679857 | 34.689426  | 78.70139272 | 93.03121354 | 121.4906143 | 6430573F11Rik |
| ENSMUSG00000102448  | 0.286410739  | -1.803842507 | 0.0032826  | 0.00903281 | 18.7926143 | 33.2630585 | 65.6621278 | 10.35544641 | 12.80246058 | 10.20929532 | Gm37101       |
| ENSMUSG00000084128  | 5.341628783  | 2.417279179  | 0.00328845 | 0.00904497 | 6.26420477 | 3.91330099 | 3.71672422 | 23.81752674 | 8.53497372  | 42.87904032 | Esrp2         |
| ENSMUSG00000026012  | 2.492648916  | 1.317679697  | 0.00329208 | 0.00905337 | 12.3210238 | 66.5261169 | 29.7337937 | 75.59475879 | 91.3242188  | 152.1185002 | Cd28          |
| ENSMUSG00000086108  | 3.591027365  | 1.844396647  | 0.00330114 | 0.00907508 | 12.5284095 | 6.84827674 | 4.95563229 | 4.142178564 | 28.16541327 | 19.3976611  | Gm5602        |
| ENSMUSG00000066684  | 0.387171997  | -1.368953485 | 0.00331864 | 0.00911765 | 36.6903422 | 45.9812867 | 37.1672422 | 14.49762497 | 21.337343   | 10.20929532 | Pilr1b        |
| ENSMUSG00000025475  | 0.246214806  | -2.022010573 | 0.00332519 | 0.00913121 | 29.531251  | 12.7182282 | 39.6450583 | 4.142178564 | 7.681476348 | 8.167436252 | Adgral1       |
| ENSMUSG00000102243  | 0.281129358  | -1.830693976 | 0.00332709 | 0.00913494 | 17.8977279 | 50.8729129 | 76.8123005 | 17.6042589  | 11.94896321 | 11.23022485 | Gm37718       |
| ENSMUSG00000030674  | 0.416521235  | -2.163537734 | 0.00335845 | 0.00921029 | 62.6420477 | 84.1359714 | 85.484657  | 33.13742851 | 17.06994744 | 46.96275845 | Qprt          |
| ENSMUSG00000097667  | 0.304801888  | -1.714056254 | 0.00337127 | 0.00924425 | 19.6875007 | 68.4827674 | 75.5733924 | 14.49762497 | 17.67694218 | 16.3348725  | Gm26764       |
| ENSMUSG00000090703  | 2.108944289  | 1.076520985  | 0.00338899 | 0.00928606 | 32.2159102 | 19.566505  | 27.2559776 | 53.84832133 | 52.91683706 | 60.23484236 | 9430037G07Rik |
| ENSMUSG00000103520  | 0.487763646  | -1.035745859 | 0.00338926 | 0.00928606 | 53.6931837 | 60.6561654 | 80.2902427 | 31.06633923 | 36.70038699 | 26.54416782 | 1110025M09Rik |
| ENSMUSG00000103614  | 3.73508819   | 1.901142307  | 0.00340926 | 0.00933329 | 3.57954558 | 7.82660199 | 7.43344844 | 24.85307138 | 28.16541327 | 16.3348725  | Gm37949       |
| ENSMUSG00000000244  | 0.474445205  | -1.075747435 | 0.00344136 | 0.00941356 | 98.4375035 | 177.079487 | 161.058049 | 52.81277669 | 98.15521978 | 55.1301947  | Tspan32       |
| ENSMUSG00000092526  | 0.415654917  | -1.266541816 | 0.00344403 | 0.00941936 | 39.3750014 | 54.7862139 | 86.7235651 | 21.74643746 | 27.3119159  | 25.52323829 | Gm17907       |
| ENSMUSG00000070868  | 0.339547474  | -1.558314796 | 0.00344489 | 0.00942018 | 42.954547  | 43.0463109 | 21.0614372 | 9.319901769 | 11.94896321 | 15.31394297 | Skint3        |
| ENSMUSG00000067768  | 0.324890482  | -1.621974617 | 0.0035021  | 0.0095689  | 21.4777235 | 26.4147817 | 23.7193234 | 8.284357128 | 6.827978976 | 8.167436252 | Klrab         |
| ENSMUSG00000107370  | 0.302490689  | -1.725037358 | 0.0035103  | 0.00958976 | 18.7926143 | 27.393107  | 35.9283341 | 7.248812487 | 11.09546584 | 6.125577189 | Gm43588       |
| ENSMUSG00000091757  | 2.9572069774 | 1.460517048  | 0.00351474 | 0.00960034 | 15.2130687 | 9.78325249 | 13.2729888 | 42.45733028 | 39.26087911 | 24.50230876 | Rps2-ps10     |
| ENSMUSG00000004864  | 0.317403887  | -1.6556083   | 0.00351661 | 0.00960391 | 31.3210238 | 29.3497575 | 24.7781615 | 6.213267846 | 6.827978976 | 14.29301344 | Mapk13        |
| ENSMUSG00000040405  | 4.298890243  | 2.103964277  | 0.00352021 | 0.00961218 | 34.005683  | 16.6315292 | 27.2559776 | 63.1682231  | 28.16541327 | 244.002158  | Glis2         |
| ENSMUSG000000085118 | 2.71742459   | 1.442408749  | 0.00361555 | 0.00986299 | 22.3721599 | 8.80492724 | 21.0614372 | 53.84832133 | 52.91683706 | 34.71160407 | Gm15774       |
| ENSMUSG00000000289  | 0.268841454  | -1.895172482 | 0.00362682 | 0.00988895 | 441.178993 | 527.317309 | 1678.72044 | 253.7084371 | 163.8714954 | 294.0277051 | Angptl4       |
| ENSMUSG00000062694  | 2.05324154   | 1.037903354  | 0.00365023 | 0.00994476 | 91.2784123 | 272.952744 | 178.402762 | 390.4003297 | 384.9273148 | 337.9276749 | Cav3          |
| ENSMUSG00000070469  | 2.10723628   | 1.075352089  | 0.00364928 | 0.00994476 | 883.252872 | 427.528134 | 261.409603 | 1145.312373 | 1107.839589 | 1063.808572 | Adamtsl3      |
| ENSMUSG00000028186  | 0.45921454   | 6.013286834  | 0.00365482 | 0.00995566 | 2.68465919 | 7.82660199 | 4.95563229 | 218.4999193 | 0           | 779.9901621 | Uox           |
| ENSMUSG00000105008  | 0.19681896   | -2.345058891 | 0.00366352 | 0.00997776 | 12.5284095 | 13.696535  | 32.2116099 | 2.071089282 | 5.120984232 | 4.083718126 | Gm34652       |
| ENSMUSG00000060509  | 0.324063025  | -1.625653674 | 0.00366776 | 0.00998608 | 29.531251  | 89.0275976 | 37.1672422 | 17.6042589  | 13.65595795 | 19.3976611  | Xcr1          |
| ENSMUSG00000103693  | 0.313289181  | -1.674433145 | 0.00366899 | 0.00998784 | 24.1619327 | 74.3527189 | 101.590462 | 15.53316962 | 21.3374343  | 25.52323829 | Gm37529       |
| ENSMUSG00000030935  | 0.353699937  | -1.499402133 | 0.00371122 | 0.01009115 | 186.13637  | 58.6995149 | 65.6621278 | 46.59950885 |             |             |               |

|                     |             |              |            |            |            |            |             |             |             |             |               |
|---------------------|-------------|--------------|------------|------------|------------|------------|-------------|-------------|-------------|-------------|---------------|
| ENSMUSG00000086298  | 0.096916893 | -3.367108039 | 0.00424441 | 0.01136429 | 2.68465919 | 45.9812867 | 11.1501727  | 2.071089282 | 1.706994744 | 2.041859063 | Gm11716       |
| ENSMUSG00000106535  | 3.881409107 | 1.956580504  | 0.00428641 | 0.01146766 | 10.7386367 | 3.91330099 | 3.71672422  | 28.99524995 | 26.45841853 | 17.35580204 | Gm43031       |
| ENSMUSG00000073821  | 3.920076057 | 1.970881646  | 0.00430655 | 0.01151974 | 17.0028415 | 2.93497575 | 7.43344844  | 23.81752674 | 36.70038699 | 47.98368798 | 8030451A03Rik |
| ENSMUSG00000087670  | 3.342274615 | 1.740830276  | 0.0043272  | 0.01157315 | 17.8977279 | 11.739903  | 3.71672422  | 26.92416067 | 46.94235546 | 39.81625173 | 9530306M11Rik |
| ENSMUSG00000027173  | 0.361962535 | -1.466087716 | 0.00433631 | 0.01159384 | 45.6392062 | 45.0029614 | 45.8395987  | 8.284357128 | 13.65595795 | 27.56509735 | Depdc7        |
| ENSMUSG00000062077  | 0.021227558 | 0.001227558  | 0.0043701  | 0.01166937 | 25.9517055 | 634.933086 | 0.00103559  | 14.9762497  | 0           | 1.020929532 | Trm54         |
| ENSMUSG00000073293  | 2.967082146 | 1.56904487   | 0.00436911 | 0.01166937 | 5.36931837 | 12.7182282 | 13.6279888  | 31.06633923 | 34.99339225 | 26.54416782 | Nudt10        |
| ENSMUSG00000049336  | 0.2785039   | -1.844230562 | 0.0043807  | 0.01169271 | 24.1619327 | 46.9596119 | 19.8225292  | 5.177723205 | 12.80246058 | 7.146506721 | Tenn2         |
| ENSMUSG00000030365  | 0.438717403 | -1.188636159 | 0.00438584 | 0.01170054 | 54.5880701 | 104.680802 | 90.4402893  | 31.06633923 | 51.20984232 | 26.54416782 | Clec2i        |
| ENSMUSG00000024600  | 0.204294693 | -2.291276369 | 0.00441014 | 0.01176152 | 31.3210238 | 27.393107  | 7.43344844  | 6.213267846 | 3.413989488 | 4.083718126 | Slc27a6       |
| ENSMUSG00000108195  | 0.320524121 | -1.641495162 | 0.00442866 | 0.01180721 | 21.4777235 | 31.306408  | 26.0170695  | 12.42653569 | 6.827978976 | 6.125577189 | Gm44415       |
| ENSMUSG00000111864  | 0.308438102 | -1.6969471   | 0.00443144 | 0.01181277 | 24.1619327 | 22.5014807 | 39.6450583  | 5.120984232 | 12.42653569 | 9.188365784 | Rpl26-ps6     |
| ENSMUSG00000031397  | 5.812660883 | 2.539198743  | 0.00444131 | 0.01183348 | 5.36931837 | 0.97832525 | 2.47781615  | 9.319901769 | 21.3374343  | 21.43952016 | Tkt11         |
| ENSMUSG00000100174  | 3.214541267 | 1.684612871  | 0.00444718 | 0.0118454  | 8.94886395 | 10.7615777 | 4.95563229  | 29.01891065 | 32.66974501 | Gm28719     |               |
| ENSMUSG00000097231  | 2.988370236 | 1.579358898  | 0.00445779 | 0.01186993 | 14.3181823 | 21.5231555 | 6.19454036  | 31.06633923 | 40.11437648 | 56.15112423 | Gm26852       |
| ENSMUSG00000068396  | 3.113470452 | 1.638523587  | 0.00445919 | 0.01187178 | 4.47443198 | 12.7182282 | 13.6279888  | 31.06633923 | 36.70038699 | 26.54416782 | Rpl34-ps1     |
| ENSMUSG00000085022  | 4.27851931  | 2.095570473  | 0.00446263 | 0.01187719 | 2.68465919 | 15.653204  | 3.71672422  | 26.92416067 | 39.26087911 | 28.58602688 | Gm5860        |
| ENSMUSG00000032495  | 0.193512949 | -2.369497986 | 0.00447604 | 0.01190727 | 19.6875007 | 119.35568  | 18.5836211  | 15.53316962 | 5.974481604 | 9.188365784 | Lrrc2         |
| ENSMUSG00000029923  | 0.301327706 | -1.728704823 | 0.00448294 | 0.01192001 | 23.2670463 | 68.6561654 | 28.4948857  | 8.284357128 | 16.21444507 | 9.188365784 | Rab19         |
| ENSMUSG00000107792  | 0.274460273 | -1.865330754 | 0.00448867 | 0.01193338 | 22.3721599 | 21.5231555 | 14.8668969  | 4.142178564 | 6.827978976 | 5.104647658 | Gm43914       |
| ENSMUSG00000047528  | 0.365228505 | -1.453128726 | 0.00451767 | 0.01200481 | 25.9517055 | 26.4147817 | 45.8395987  | 11.39099105 | 11.94896321 | 12.25115438 | Als2cr12      |
| ENSMUSG00000061086  | 0.461813005 | -1.114619295 | 0.0045322  | 0.01203588 | 21.1193189 | 446.116313 | 724.761222  | 248.5307138 | 192.0369087 | 197.0393996 | Myf4          |
| ENSMUSG00000069804  | 0.409208068 | -1.289093507 | 0.00454144 | 0.01205854 | 43.8494334 | 98.8108501 | 12.6518199  | 43.49287492 | 28.16543127 | 36.75346313 | Gm10277       |
| ENSMUSG00000044544  | 3.517945195 | -1.841733008 | 0.00455344 | 0.01208472 | 8.05397756 | 5.86995149 | 3.71672422  | 22.7819821  | 23.04442904 | 17.35580204 | 4921513103Rik |
| ENSMUSG00000080772  | 0.192246625 | -2.378969825 | 0.00456173 | 0.01210482 | 8.05397756 | 18.5881797 | 38.4061503  | 3.106633923 | 5.120984232 | 4.083718126 | Gm12543       |
| ENSMUSG000000338403 | 0.151584789 | -2.721803106 | 0.0045625  | 0.01210496 | 181.661938 | 2073.0712  | 448.484722  | 163.6160533 | 108.3941662 | 137.8254868 | Hfe2          |
| ENSMUSG000000110588 | 0.467903411 | -1.095717348 | 0.00457475 | 0.01213339 | 10.965913  | 167.293168 | 245.303798  | 61.09713382 | 115.2221452 | 67.38134908 | Gm45774       |
| ENSMUSG00000108633  | 0.421218353 | -1.247359796 | 0.00457688 | 0.01213551 | 136.022732 | 285.670973 | 524.058115  | 125.3009016 | 109.2476636 | 163.348725  | Gm44694       |
| ENSMUSG00000078763  | 0.381471397 | -1.390353208 | 0.00458517 | 0.01215369 | 74.2755708 | 340.457187 | 308.48811   | 86.98574985 | 100.7126899 | 87.79993971 | Sfn1          |
| ENSMUSG00000111468  | 0.287850627 | -1.796607741 | 0.00458804 | 0.01215939 | 19.6875007 | 17.6098545 | 27.2559776  | 6.213267846 | 4.26748686  | 8.167436252 | 5033425B01Rik |
| ENSMUSG00000076490  | 0.457351304 | -1.12862533  | 0.00461649 | 0.01222712 | 52.7982973 | 115.442379 | 87.9624737  | 33.13742851 | 47.79585283 | 35.7325336  | Trbc1         |
| ENSMUSG00000075277  | 0.19690131  | -2.344455383 | 0.00464622 | 0.01229507 | 14.3181823 | 16.6315292 | 48.3174148  | 2.071089282 | 4.26748686  | 9.188365784 | Haglrl        |
| ENSMUSG00000102719  | 0.284636746 | -1.812806172 | 0.0046767  | 0.0123634  | 25.9517055 | 89.0275976 | 131.324256  | 11.39099105 | 24.75142379 | 33.69067454 | Gm37760       |
| ENSMUSG00000066058  | 0.300160198 | -1.736195409 | 0.00468161 | 0.01237251 | 26.8465919 | 66.5261169 | 21.0614372  | 10.35544641 | 12.80246058 | 11.23022485 | Cldn19        |
| ENSMUSG00000075225  | 3.541858482 | 1.824506569  | 0.00469908 | 0.01241094 | 7.15909116 | 9.78325249 | 4.95563229  | 29.01891065 | 34.71160407 | 36.71160407 | Cdc162        |
| ENSMUSG00000040759  | 0.297424475 | -1.749404724 | 0.00476776 | 0.01250777 | 30.4261374 | 32.2847332 | 14.8668969  | 10.35544641 | 6.827978976 | 6.125577189 | Cmtm5         |
| ENSMUSG00000053825  | 0.36676785  | -1.447454322 | 0.00476696 | 0.01257077 | 25.9517055 | 30.3280827 | 30.97277018 | 14.9762497  | 9.388471092 | 8.167436252 | Ppfia2        |
| ENSMUSG00000073164  | 0.259447882 | -1.946483336 | 0.00482327 | 0.01270526 | 28.6363647 | 14.6748787 | 16.1058049  | 5.177723205 | 4.26748686  | 6.125577189 | 2410018L33Rik |
| ENSMUSG00000024399  | 0.449138591 | -1.154767407 | 0.00483561 | 0.01273579 | 69.8011388 | 179.033521 | 146.191153  | 52.81277669 | 75.96126611 | 47.98368798 | Ltb           |
| ENSMUSG00000015843  | 0.491031234 | -1.026113298 | 0.00484007 | 0.01274555 | 106.491481 | 217.188205 | 116.4579358 | 64.20376774 | 61.45180178 | 90.86272831 | Rxrg          |
| ENSMUSG00000111065  | 4.268787605 | 2.093826383  | 0.00485799 | 0.01287867 | 3.57954558 | 3.91330099 | 8.62735651  | 15.53316962 | 16.21645007 | 35.7325336  | Gm47676       |
| ENSMUSG00000092625  | 0.243756431 | -2.036487811 | 0.00489073 | 0.01286974 | 11.6335231 | 27.393107  | 27.2559776  | 7.681476348 | 6.106633923 | 5.104647658 | Gm20404       |
| ENSMUSG00000090069  | 3.122825482 | 1.642851947  | 0.00490698 | 0.01289769 | 21.4772735 | 9.78325249 | 7.43344844  | 40.386241   | 55.47732918 | 26.54416782 | E430024P14Rik |
| ENSMUSG00000085058  | 0.256008144 | -1.965738392 | 0.00491733 | 0.01291887 | 13.4232959 | 19.566505  | 27.2559776  | 6.213267846 | 5.974481604 | 3.062788595 | 8030453O22Rik |
| ENSMUSG00000103195  | 0.32048783  | -1.64165852  | 0.00493824 | 0.01296576 | 26.8465919 | 40.1113352 | 70.61177601 | 18.63980354 | 17.92344861 | 7.146506721 | Gm37644       |
| ENSMUSG00000099924  | 0.25126639  | -1.992710389 | 0.00493972 | 0.01296764 | 12.5284095 | 45.9812867 | 30.97277018 | 6.213267846 | 5.120984232 | 11.23022485 | Gm28320       |
| ENSMUSG00000039521  | 0.339127921 | -1.560098527 | 0.00495308 | 0.01299867 | 18.7926143 | 31.306408  | 32.2116099  | 7.248812487 | 10.24196846 | 10.20929532 | Foxp3         |
| ENSMUSG00000063011  | 0.128599526 | -2.959042773 | 0.00495806 | 0.01300771 | 2.68465919 | 40.1113352 | 26.0170695  | 4.142178564 | 1.706994744 | 3.062788595 | Msln          |
| ENSMUSG00000047797  | 21.63768508 | 4.435474255  | 0.00496818 | 0.0130262  | 5.36931837 | 6.84827674 | 2.47781615  | 88.02129449 | 0.85349372  | 230.7300741 | Gjb1          |
| ENSMUSG00000041202  | 0.382211286 | -1.387557717 | 0.00499296 | 0.01308914 | 25.0568191 | 40.1113352 | 50.795231   | 11.39099105 | 16.21444507 | 16.3348725  | Plag2gd       |
| ENSMUSG00000058248  | 0.280173512 | -1.835607526 | 0.00500388 | 0.01311572 | 75.1704572 | 43.0463109 | 18.5836211  | 7.248812487 | 18.77694218 | 12.25115438 | Kcnh1         |
| ENSMUSG00000083834  | 0.213356947 | -2.228659008 | 0.00501331 | 0.01313842 | 13.4232959 | 19.566505  | 63.1843117  | 10.35544641 | 5.974481604 | 4.083718126 | Gm12577       |
| ENSMUSG00000020061  | 0.061886558 | -3.961584994 | 0.005033   | 0.01318798 | 106.491481 | 1249.32134 | 174.50238   | 97.34119626 | 7.681476348 | 6.125577189 | Mybpcl        |
| ENSMUSG00000041406  | 0.446427194 | -1.163503185 | 0.00508304 | 0.0133129  | 45.6392062 | 34.2413837 | 42.1288671  | 16.56871426 | 21.3374343  | 16.3348725  | Gm05324       |
| ENSMUSG00000022422  | 0.322271824 | -1.633650036 | 0.00509392 | 0.0133359  | 27.7414783 | 28.3714322 | 18.5836211  | 6.213267846 | 6.827978976 | 11.23022485 | Ossc1         |
| ENSMUSG00000022149  | 47.25509306 | 5.562397923  | 0.00510226 | 0.01335286 | 1.78977279 | 0.97832525 | 3.71672422  | 88.02129449 | 0           | 215.4161312 | C9            |
| ENSMUSG00000047604  | 0.450248879 | -1.15120541  | 0.00511402 | 0.01337337 | 51.9034109 | 115.442379 | 17.5733924  | 32.10188387 | 45.23536071 | 31.64881548 | Frat2         |
| ENSMUSG00000061578  | 0.179917481 | -2.474592729 | 0.00513136 | 0.01341456 | 9.84375035 | 32.2847332 | 11.1501727  | 4.142178564 | 3.413989488 | 2.041859063 | Ksr2          |
| ENSMUSG00000024353  | 0.285111444 | -1.810402146 | 0.00518917 | 0.01355104 | 20.5823871 | 49.8945877 | 40.8839664  | 8.284357128 | 17.92344481 | 5.104647658 | Mtbl1         |
| ENSMUSG00000054304  | 0.315092474 | -1.666152798 | 0.00518903 | 0.01355104 | 22.3721599 | 33.2630585 | 71.8566682  | 11.39099105 | 17.06994744 | 11.23022485 | D130007C19Rik |
| ENSMUSG00000065750  | 0.163499469 | -2.61264214  | 0.00520896 | 0.01359435 | 8.05397756 | 12.7182282 | 43.3617825  | 3.106633923 | 5.120984232 | 2.041859063 | Gm23346       |
| ENSMUSG00000088395  | 0.321506043 | -1.637082238 | 0.00520878 | 0.01359435 | 35.7954558 | 19.566505  | 30.97277018 | 5.177723205 | 10.24196846 | 12.25115438 | Gm13056       |
| ENSMUSG00000090919  | 0.367540764 | -1.444023828 | 0.00523432 | 0.01365423 | 56.3778429 | 26.4147817 | 38.4061503  | 12.42653569 | 11.94896321 | 20.41859063 | Pabpc4l       |
| ENSMUSG00000097554  | 4.810812443 | 2.266280555  | 0.00527318 | 0.01374499 | 3.57954558 | 0.97832525 | 6.19454036  | 15.53316962 | 15.3629527  | 19.3976611  | Gm26825       |
| ENSMUSG00000097081  | 0.377043191 | -1.407198298 | 0.00527583 | 0.01374927 | 51.0085245 | 38.1546847 | 33.405018   | 9.319901769 | 13.65595795 | 23.48137923 | Gm10425       |
| ENSMUSG000000046178 | 4.031866224 | 2.011447771  | 0.00530981 | 0.0138192  | 4          |            |             |             |             |             |               |

|                     |              |              |            |            |            |            |            |              |             |             |               |
|---------------------|--------------|--------------|------------|------------|------------|------------|------------|--------------|-------------|-------------|---------------|
| ENSMUSG00000026343  | 0.397913753  | -1.329472331 | 0.00578841 | 0.01490447 | 29.531251  | 25.4364565 | 37.1672422 | 12.42653569  | 12.80246058 | 11.23022485 | Gpr39         |
| ENSMUSG000000102091 | 2.254249585  | 1.172647256  | 0.00582155 | 0.0149716  | 71.5909116 | 40.1113352 | 30.9727018 | 139.7985265  | 113.5151505 | 70.44413768 | Offr1034      |
| ENSMUSG000000031719 | 0.416681331  | -1.262983631 | 0.00582833 | 0.01498675 | 41.1647742 | 47.9379372 | 90.4402893 | 24.85307138  | 29.87240802 | 19.3976611  | Gm10478       |
| ENSMUSG000000086468 | 3.722356057  | 1.896216061  | 0.00585417 | 0.0150395  | 6.26420477 | 6.84827674 | 2.47781615 | 24.85307138  | 16.21645007 | 18.37673157 | Eta1a1os      |
| ENSMUSG000000029601 | 0.32507498   | -1.621155575 | 0.00586152 | 0.01505381 | 21.4772735 | 29.3497575 | 21.0614372 | 8.284357128  | 5.120984232 | 10.20929532 | Igcd          |
| ENSMUSG000000069227 | 0.294063645  | -1.76579966  | 0.00588887 | 0.01511858 | 21.4772735 | 20.5448302 | 17.344713  | 8.284357128  | 4.26748668  | 5.104647658 | Gpr1n1        |
| ENSMUSG000000043424 | 0.416101163  | -1.264993773 | 0.00593019 | 0.01520941 | 38.480115  | 42.0679857 | 56.9897713 | 20.71089282  | 24.75142379 | 11.23022485 | Eif3j2        |
| ENSMUSG000000043644 | 2.286805822  | 1.193333868  | 0.0059461  | 0.0152456  | 28.6363647 | 96.8541996 | 87.9624732 | 135.656348   | 186.0624271 | 164.3696546 | O610009L18Rik |
| ENSMUSG000000109321 | 0.219828409  | -2.185550254 | 0.00598358 | 0.0153301  | 13.4232959 | 16.6315292 | 32.2116099 | 2.071089282  | 3.413989488 | 8.167436252 | A330076H08Rik |
| ENSMUSG000000086560 | 2.705057084  | 1.435659039  | 0.00598939 | 0.01533802 | 88.5937531 | 39.1330099 | 16.1058049 | 126.3364642  | 138.2665743 | 127.6161914 | Gm13372       |
| ENSMUSG000000043333 | 0.409096004  | -1.289507692 | 0.00600012 | 0.01536317 | 32.2159102 | 34.2413837 | 33.450518  | 10.35544641  | 17.92344481 | 12.25115438 | Rhbd12        |
| ENSMUSG000000094114 | 0.483022387  | -1.04983804  | 0.00602938 | 0.01542876 | 68.9062524 | 74.3527189 | 115.218451 | 52.81277669  | 28.16541327 | 43.89996986 | NA            |
| ENSMUSG000000054640 | 2.539806775  | 1.344718743  | 0.00610201 | 0.01560257 | 298.892056 | 131.095583 | 52.0341391 | 421.4666689  | 417.3602149 | 388.9741515 | Slc8a1        |
| ENSMUSG000000029830 | 0.252828853  | -1.983766982 | 0.00611013 | 0.0156128  | 17.8977279 | 14.6748787 | 19.8225292 | 3.106633923  | 6.827978976 | 3.062788595 | Svopl         |
| ENSMUSG000000103738 | 4.131642171  | 2.046715312  | 0.00612224 | 0.01564004 | 6.26420477 | 5.86995149 | 2.47781615 | 32.10188387  | 15.3629527  | 14.29301344 | Gm37652       |
| ENSMUSG000000097325 | 0.488126258  | -1.034673733 | 0.00618552 | 0.01578775 | 109.17614  | 89.0275976 | 56.9897713 | 36.24406244  | 34.99339225 | 54.10926517 | Gm16897       |
| ENSMUSG000000022877 | 1651.253559  | 10.68934596  | 0.00622057 | 0.01586764 | 0          | 0          | 0          | 300.3079459  | 0           | 636.0390981 | Hrg           |
| ENSMUSG000000052133 | 0.470255873  | -1.088482134 | 0.00629377 | 0.01602783 | 121.70455  | 57.7211897 | 71.8566682 | 39.3509636   | 32.43290013 | 46.96275845 | Sma5b         |
| ENSMUSG000000006642 | 3.593861602  | 1.845534852  | 0.00623332 | 0.01609809 | 10.7386367 | 2.93497575 | 4.95563229 | 21.74643746  | 24.75142379 | 21.43952016 | Tcf23         |
| ENSMUSG000000103818 | 0.28388625   | -1.816615123 | 0.00632422 | 0.01609809 | 14.3181823 | 25.4364565 | 49.5563229 | 10.35544641  | 7.681476348 | 7.146506721 | Gm38009       |
| ENSMUSG000000087141 | 2.064922712  | 1.046087784  | 0.0063382  | 0.01612399 | 47.428979  | 34.2413837 | 47.0785068 | 73.52366951  | 64.86580027 | 127.6161914 | Plox2         |
| ENSMUSG000000087365 | 0.33116091   | -1.594395705 | 0.00633783 | 0.01612399 | 42.0596606 | 19.566505  | 65.6621278 | 16.56871426  | 10.24196846 | 15.31394297 | C430049B03Rik |
| ENSMUSG000000037548 | 0.38353588   | -1.382566546 | 0.00643601 | 0.01635316 | 51.9034109 | 99.7891754 | 92.9181054 | 21.74643746  | 52.91683706 | 18.37673157 | H2-DMb2       |
| ENSMUSG000000105962 | 0.391784115  | -1.351869192 | 0.00643936 | 0.01635922 | 43.8494334 | 108.594103 | 168.491498 | 33.13742851  | 46.08885809 | 45.94182892 | Gm24232       |
| ENSMUSG000000024376 | 0.498348715  | -1.004772486 | 0.00655111 | 0.01662816 | 97.5426171 | 112.507404 | 86.7235651 | 73.52366951  | 33.28639751 | 41.85811079 | Epb4114a      |
| ENSMUSG000000015533 | 3.120028201  | 1.641559069  | 0.00656487 | 0.01665809 | 82.3295484 | 41.0896604 | 13.6279888 | 173.9714997  | 69.9867845  | 186.8301043 | Itga2         |
| ENSMUSG000000023732 | 0.377042078  | -1.407209446 | 0.00657478 | 0.01667796 | 34.9005694 | 55.7645392 | 28.4948857 | 16.830980354 | 9.388471092 | 17.35580204 | Wnt6          |
| ENSMUSG000000104631 | 0.21811922   | -2.196811196 | 0.00659315 | 0.01671733 | 7.15909116 | 30.3280827 | 55.708633  | 6.213267846  | 6.827978976 | 7.146506721 | Gm43774       |
| ENSMUSG000000093979 | 2.068828183  | 1.048813834  | 0.00667254 | 0.01689887 | 42.829797  | 29.3497575 | 79.7337937 | 54.88386597  | 94.73820829 | 71.46506721 | Gm2237        |
| ENSMUSG000000009292 | 0.42887518   | -1.221370269 | 0.00671647 | 0.01699692 | 60.8522749 | 98.8108501 | 78.0512086 | 48.67059813  | 17.06994744 | 36.75346313 | Trpm2         |
| ENSMUSG000000070526 | 0.401151886  | -1.317779513 | 0.00675675 | 0.01708609 | 30.4261374 | 30.3280827 | 52.0341391 | 11.39099105  | 17.06994744 | 16.3348725  | Page12        |
| ENSMUSG000000006529 | 35.8751239   | 5.141085825  | 0.00678712 | 0.01715522 | 3.57954558 | 1.9566505  | 7.37672422 | 101.4833748  | 0           | 224.6044969 | Itih1         |
| ENSMUSG000000022132 | 0.467617308  | -1.096599765 | 0.00678961 | 0.01715893 | 40.2698878 | 35.219709  | 50.795231  | 18.63980354  | 18.77694218 | 21.43952016 | Cldn10        |
| ENSMUSG000000017861 | 0.482392127  | -1.051721732 | 0.00684849 | 0.01729742 | 59.0625021 | 60.6561654 | 50.795231  | 34.17297315  | 30.72590539 | 17.35580204 | Mybl2         |
| ENSMUSG000000083623 | 0.329136651  | -1.603241406 | 0.00684725 | 0.01729742 | 21.4772735 | 28.3714322 | 39.6450583 | 15.53316962  | 6.827978976 | 7.146506721 | Ska1          |
| ENSMUSG000000005980 | 2.027032279  | 1.019369063  | 0.00691868 | 0.01745907 | 47.428979  | 41.0896604 | 21.0614372 | 66.27485703  | 78.52175822 | 79.63250346 | Dnae1         |
| ENSMUSG000000036856 | 0.37795918   | -1.406217836 | 0.00693449 | 0.01749635 | 32.2159102 | 34.2413837 | 58.2286794 | 20.71089282  | 24.75142379 | 29.6095641  | Wnt4          |
| ENSMUSG000000037991 | 0.373406555  | -1.421180842 | 0.00693576 | 0.01749696 | 20.5823871 | 43.0463109 | 32.2116099 | 12.42653569  | 11.09546584 | 12.25115438 | Rmi2          |
| ENSMUSG000000025791 | 0.316372912  | -1.660302012 | 0.00700641 | 0.01766467 | 1353.96312 | 5026.63513 | 1476.77482 | 850.1821503  | 821.0644718 | 814.7017662 | Pgm2          |
| ENSMUSG000000089727 | 0.277186446  | -1.85107138  | 0.00704352 | 0.0177503  | 14.3181823 | 24.4581312 | 26.0170695 | 9.388471092  | 4.142178564 | 4.083718126 | Klra8         |
| ENSMUSG000000074637 | 0.254006234  | -1.977064188 | 0.00716457 | 0.01802584 | 11.6335231 | 17.6098545 | 23.5392534 | 4.142178564  | 5.974481604 | 3.062788595 | Sox2          |
| ENSMUSG000000010154 | 0.387693962  | -1.367009827 | 0.00724186 | 0.01818519 | 33.1107966 | 34.2413837 | 30.7727018 | 12.42653569  | 7.681476348 | 18.37673157 | Spire2        |
| ENSMUSG000000015854 | 0.240877804  | -2.053626635 | 0.00724019 | 0.01818519 | 40.2698878 | 38.1546847 | 59.4675875 | 8.284357128  | 1.706994744 | 23.48137923 | Cd5l          |
| ENSMUSG000000071005 | 0.376236904  | -1.410286727 | 0.00725905 | 0.01821754 | 21.4772735 | 41.0896604 | 35.9283341 | 12.42653569  | 9.388471092 | 15.31394297 | Ccl19         |
| ENSMUSG000000107436 | 0.369398805  | -1.436748896 | 0.00730242 | 0.0183074  | 31.3210238 | 92.9408986 | 126.368623 | 27.95970531  | 25.60491216 | 38.7953222  | Gm44416       |
| ENSMUSG000000085723 | 2.817107135  | 1.494214431  | 0.00732122 | 0.01834367 | 11.6335231 | 7.82660199 | 8.67235651 | 35.20851779  | 22.19093167 | 22.46044969 | Gm15915       |
| ENSMUSG000000050822 | 0.360946677  | -1.470150365 | 0.00733767 | 0.01837943 | 23.2670463 | 31.306408  | 32.2116099 | 6.213267846  | 14.50945532 | 10.20929532 | Slc29a4       |
| ENSMUSG000000080932 | 3.865362441  | 1.950603697  | 0.00734144 | 0.01838346 | 4.74431198 | 3.91330029 | 4.95563229 | 23.81752674  | 15.3629527  | 12.25115438 | Gm10224       |
| ENSMUSG000000020051 | 287.6368032  | 8.168104471  | 0.0074173  | 0.01855694 | 0          | 0          | 1.23890807 | 84.91466056  | 0           | 232.7719332 | Pah           |
| ENSMUSG000000020884 | 9.051215674  | 3.178111574  | 0.00741911 | 0.01855873 | 7.18977279 | 5.86995149 | 4.95563229 | 31.06633923  | 0.853497372 | 81.67436252 | Asgr1         |
| ENSMUSG000000106121 | 0.262354975  | -1.930407949 | 0.00749681 | 0.01872544 | 14.3181823 | 59.6778402 | 137.518796 | 21.74643746  | 16.21645007 | 17.35580204 | Gm42679       |
| ENSMUSG00000011434  | 0.344579737  | -1.537090228 | 0.00753426 | 0.01880512 | 23.2670463 | 80.2226704 | 105.307186 | 24.85307138  | 27.3119159  | 19.3976611  | Gm47121       |
| ENSMUSG000000054641 | 0.495521551  | -1.021980292 | 0.00757257 | 0.01888968 | 3280.65353 | 1854.90467 | 1126.16744 | 1035.544641  | 664.874558  | 1403.778106 | Mmm1          |
| ENSMUSG000000019726 | 2.059820899  | 1.042518901  | 0.00757689 | 0.01889759 | 764.232982 | 387.416798 | 203.180924 | 1001.371668  | 914.095684  | 879.0203266 | Lyst          |
| ENSMUSG000000107428 | 0.303907908  | -1.71829388  | 0.00758456 | 0.01891115 | 12.5284095 | 29.3497575 | 34.689426  | 8.284357128  | 7.681476348 | 7.146506721 | Gm44154       |
| ENSMUSG000000046634 | 5.181087321  | 2.373254899  | 0.00765773 | 0.01907394 | 7.15909116 | 2.93497575 | 0          | 18.63980354  | 18.77694218 | 17.35580204 | Pkd111        |
| ENSMUSG000000086043 | 2.710592461  | 1.43860822   | 0.00772497 | 0.01922446 | 45.6392062 | 26.4147817 | 8.67235651 | 85.9502502   | 73.40077399 | 62.27670142 | Gm12473       |
| ENSMUSG000000088769 | 5.476196519  | 2.45317422   | 0.00774104 | 0.01925877 | 6.26420477 | 7.93497575 | 0          | 16.56871426  | 12.80246058 | 23.48137923 | Gm22637       |
| ENSMUSG000000051951 | 2.3567447188 | 1.236797007  | 0.00777239 | 0.01932368 | 54.5880701 | 33.2630585 | 16.1058049 | 102.5181995  | 76.81476348 | 68.40227861 | Klra4         |
| ENSMUSG000000104378 | 0.322400299  | -1.633075011 | 0.00779243 | 0.01936367 | 16.1079551 | 36.1980342 | 56.9897713 | 13.46208033  | 9.388471092 | 12.25115438 | Gm37510       |
| ENSMUSG000000109257 | 0.290340001  | -1.784184743 | 0.0078108  | 0.01939244 | 15.2130687 | 41.0896604 | 54.5119552 | 16.56871426  | 9.388471092 | 6.125577189 | Gm45200       |
| ENSMUSG000000106332 | 0.294007975  | -1.766072808 | 0.00785346 | 0.01948895 | 24.1619327 | 37.1763594 | 64.2321998 | 13.46208033  | 4.26748668  | 19.3976611  | Gm43506       |
| ENSMUSG000000106057 | 0.36293369   | -2.37528429  | 0.00789518 | 0.01958186 | 6.26420477 | 37.1763594 | 58.2286794 | 11.39099105  | 5.120984232 | 3.062788595 | Gm43560       |
| ENSMUSG000000108500 | 0.324289629  | -1.624645209 | 0.0079269  | 0.01964902 | 18.7926143 | 25.4364565 | 34.689426  | 6.213267846  | 12.80246058 | 6.125577189 | Gm45033       |
| ENSMUSG000000097263 | 0.368860171  | -1.438854077 | 0.00798635 | 0.01978479 | 46.5340926 | 144.792137 | 257.692879 | 49.70614277  | 51.20984232 | 64.31856049 | Gm26804       |
| ENSMUSG000000091390 | 3.286697179  | 1.716638539  | 0.0080105  | 0.01983302 | 4.74431198 | 8.80492724 | 4.95563229 | 19.67534818  | 17.06994744 | 23.48137923 | Gm17168       |
| ENSMUSG0000         |              |              |            |            |            |            |            |              |             |             |               |

|                     |              |              |            |            |            |            |             |             |             |             |               |
|---------------------|--------------|--------------|------------|------------|------------|------------|-------------|-------------|-------------|-------------|---------------|
| ENSMUSG00000108557  | 0.276229866  | -1.856058784 | 0.00916332 | 0.0222705  | 16.1079551 | 25.4364565 | 48.3174148  | 10.35544641 | 11.09546584 | 3.062788595 | Gm44835       |
| ENSMUSG00000104183  | 0.196884001  | -2.344582215 | 0.00917179 | 0.02228468 | 8.94886395 | 26.4147817 | 40.8839664  | 10.35544641 | 1.706994744 | 3.062788595 | 1700054019Rik |
| ENSMUSG00000003053  | 346.8755041  | 8.438274153  | 0.00921225 | 0.02237338 | 0          | 1.9566505  | 0           | 188.4691247 | 0           | 497.1926819 | Cyp2c29       |
| ENSMUSG000000063245 | 0.391297604  | -1.35366182  | 0.00921996 | 0.02238888 | 23.2670463 | 51.8512382 | 45.8395987  | 11.3909105  | 15.3629527  | 20.41859063 | Zfp993        |
| ENSMUSG00000026070  | 0.447805723  | -1.159055129 | 0.00923633 | 0.0224222  | 47.428979  | 94.8975491 | 42.1228745  | 25.88861603 | 27.3119159  | 29.60695641 | 118r1         |
| ENSMUSG00000038379  | 0.371168966  | -1.429852005 | 0.0092526  | 0.02245747 | 51.0085245 | 62.6128159 | 22.3003453  | 23.81752674 | 12.80246058 | 14.29301344 | Ttk           |
| ENSMUSG00000076583  | 0.100785545  | -3.310639357 | 0.00938243 | 0.02273775 | 1.78977279 | 30.3280827 | 49.5563229  | 2.071089282 | 5.974481604 | 0           | lgkw8-24      |
| ENSMUSG00000103285  | 0.38156416   | -1.390002427 | 0.00938703 | 0.02274565 | 39.3750014 | 84.1359714 | 163.535866  | 35.20851779 | 46.08885809 | 27.56509735 | Gm37274       |
| ENSMUSG0000019368   | 8.131827246  | 3.023579567  | 0.00943807 | 0.02285298 | 8.94886395 | 0          | 4.95563229  | 25.88861603 | 5.120984232 | 82.69529205 | Sec144        |
| ENSMUSG00000087526  | 2.131712322  | 1.092012757  | 0.00944118 | 0.02285723 | 17.0028415 | 15.653204  | 21.0614372  | 33.13742851 | 42.6748686  | 37.77439267 | Gm15738       |
| ENSMUSG00000107894  | 0.289048454  | -1.790385168 | 0.0094449  | 0.02286299 | 10.7386367 | 38.1546847 | 32.2116099  | 9.319901769 | 5.974481604 | 8.167436252 | Gm10388       |
| ENSMUSG00000052270  | 0.319473051  | -1.646233858 | 0.00945076 | 0.02287306 | 26.8465919 | 142.835486 | 45.8395987  | 24.85307138 | 19.63043956 | 24.50230876 | Fpr2          |
| ENSMUSG00000046449  | 0.345174378  | -1.534602718 | 0.00954593 | 0.02306796 | 26.8465919 | 26.4147817 | 16.1058049  | 6.213267846 | 7.681476348 | 10.20929532 | Nexmf1        |
| ENSMUSG00000034209  | 2.211695698  | 1.145152903  | 0.00955329 | 0.02307917 | 27.7414783 | 35.219709  | 33.450518   | 50.74168741 | 51.20984232 | 111.2813189 | Rsd110a       |
| ENSMUSG00000087390  | 2.467319062  | 1.30294429   | 0.00955988 | 0.02309179 | 13.4232959 | 9.78325249 | 9.91126458  | 30.03079459 | 24.75142379 | 27.56509735 | Gm7598        |
| ENSMUSG00000110079  | 0.298738563  | -1.743044612 | 0.00958932 | 0.0231464  | 14.3181823 | 46.9596119 | 76.8123005  | 15.53316962 | 16.21645007 | 9.188365784 | Gm45292       |
| ENSMUSG00000111264  | 2.263018178  | 1.178248173  | 0.00960098 | 0.02317124 | 15.2130687 | 11.739903  | 18.5836211  | 30.03079459 | 38.40738174 | 33.69067454 | E03002216Rik  |
| ENSMUSG00000104030  | 0.431416522  | -1.212846665 | 0.00964337 | 0.0232636  | 76.96023   | 163.380317 | 275.037592  | 52.81277669 | 98.15219778 | 70.44413768 | 5330406M23Rik |
| ENSMUSG00000025644  | 2.693285996  | 1.429367436  | 0.00967632 | 0.02333313 | 10.7386367 | 5.86995149 | 17.344713   | 32.10188387 | 27.3119159  | 30.62788595 | Gm7628        |
| ENSMUSG00000030131  | 1095.044037  | 10.09677317  | 0.0097616  | 0.02351197 | 0          | 0          | 0           | 160.5094194 | 0           | 460.4392187 | Mug2          |
| ENSMUSG00000093668  | 0.297087729  | -1.75103908  | 0.00977465 | 0.02354007 | 13.4232959 | 59.6778402 | 84.2457489  | 19.67534818 | 13.65595795 | 13.27208391 | Pou5f2        |
| ENSMUSG00000042662  | 0.288514117  | -1.793286182 | 0.00979143 | 0.02357712 | 23.2670463 | 16.980342  | 12.3890807  | 9.388471092 | 7.146506721 | 7.146506721 | Dusp15        |
| ENSMUSG00000086679  | 0.401929147  | -1.314986892 | 0.00981767 | 0.02363358 | 30.4261374 | 23.479806  | 24.7781615  | 9.319901769 | 11.09546584 | 11.23022485 | Gm15551       |
| ENSMUSG00000083022  | 0.337749525  | -1.567059721 | 0.00982032 | 0.02363661 | 19.6875007 | 44.0246362 | 75.5733924  | 13.46208033 | 11.94896321 | 21.43952016 | Rps15a-ps6    |
| ENSMUSG00000035836  | 226.2534911  | 7.821796243  | 0.00982827 | 0.02364566 | 0          | 0          | 1.23890807  | 55.91941062 | 0           | 193.976611  | Ugt2b1        |
| ENSMUSG00000035875  | 4.772389679  | 2.254711848  | 0.00986383 | 0.02370939 | 17.0028415 | 12.7182282 | 11.1501727  | 36.24406244 | 8.53497372  | 151.0975707 | Al182371      |
| ENSMUSG00000093553  | 2.218324199  | 1.149470225  | 0.00989565 | 0.02377735 | 34.005683  | 16.6315292 | 17.344713   | 48.67059813 | 43.52836597 | 60.23482362 | Gm20633       |
| ENSMUSG00000106772  | 0.334989976  | -1.577810169 | 0.00996601 | 0.0239125  | 26.8465919 | 70.4394197 | 92.9181054  | 23.81752674 | 9.388471092 | 30.62788595 | Gm43794       |
| ENSMUSG00000087333  | 0.213301857  | -2.229031567 | 0.01000854 | 0.02400095 | 28.6363647 | 11.739903  | 9.91126458  | 4.142178564 | 1.706994744 | 5.104647658 | Gm13652       |
| ENSMUSG00000030088  | 0.49385706   | -1.017834562 | 0.01005839 | 0.02411706 | 701.590934 | 352.19709  | 6.9167262   | 243.3529906 | 148.5085427 | 433.8950509 | Alldh11       |
| ENSMUSG00000087496  | 2.508859459  | 1.327031656  | 0.01021332 | 0.02447122 | 11.6335231 | 10.7615777 | 12.3890807  | 23.81752674 | 38.40738174 | 24.50230876 | Gm13523       |
| ENSMUSG00000039196  | 0.431832868  | -1.223851302 | 0.01022484 | 0.02449535 | 315.894898 | 174.141494 | 826.1483477 | 136.6918926 | 53.77033448 | 202.1440472 | Orm1          |
| ENSMUSG00000107865  | 0.30286091   | -1.723272712 | 0.01026259 | 0.02456842 | 30.4261374 | 30.3280827 | 138.757704  | 15.53316962 | 23.04442904 | 21.43952016 | Gm44417       |
| ENSMUSG00000106665  | 2.903136628  | 1.53761247   | 0.01031015 | 0.02467528 | 10.7386367 | 5.86995149 | 7.43344844  | 17.6042589  | 23.04442904 | 29.60695641 | Gm43389       |
| ENSMUSG00000031376  | 0.169325833  | -2.562126006 | 0.0103185  | 0.0246918  | 8.05397756 | 43.0463109 | 9.91126458  | 1.035544641 | 1.035446232 | 4.083718126 | Atp2b3        |
| ENSMUSG00000079564  | 3.877726633  | 1.955211102  | 0.01033799 | 0.02472795 | 6.26420477 | 2.93497575 | 3.71672422  | 10.35544641 | 18.77694218 | 21.43952016 | Gm11149       |
| ENSMUSG00000054764  | 2.944054041  | 1.557804154  | 0.01035088 | 0.02475297 | 8.05397756 | 9.78325249 | 7.43344844  | 24.85307138 | 15.3629527  | 34.71160407 | Mtnr1a        |
| ENSMUSG00000078452  | 0.247409548  | -2.015026919 | 0.01042358 | 0.02490974 | 22.3721599 | 19.566505  | 17.344713   | 2.071089282 | 2.560492116 | 10.20929532 | Raet1d        |
| ENSMUSG00000027171  | 0.387802599  | -1.366605621 | 0.01044702 | 0.02496055 | 31.3210238 | 34.2413837 | 24.7781615  | 10.35544641 | 7.681476348 | 17.35580204 | Prrg4         |
| ENSMUSG00000064280  | 2.218324199  | 1.404114786  | 0.01050119 | 0.02506875 | 8.05397756 | 15.653204  | 8.67235651  | 21.74643746 | 32.43296310 | 31.64881548 | Ccdc146       |
| ENSMUSG00000036587  | 0.245200467  | -2.027966368 | 0.0105375  | 0.02514478 | 9.84375035 | 41.0896604 | 21.0614372  | 5.177723205 | 3.413989488 | 9.188365784 | Fut7          |
| ENSMUSG00000105136  | 0.290155669  | -1.785096506 | 0.01054696 | 0.02516677 | 17.0028415 | 50.0729129 | 106.546094  | 24.85307138 | 15.3629527  | 10.20929532 | 8054087014Rik |
| ENSMUSG00000103164  | 3.76894365   | 1.914160225  | 0.01056403 | 0.02519036 | 3.57954558 | 5.86995149 | 3.71672422  | 10.35544641 | 17.92344481 | 21.43952016 | Gm38150       |
| ENSMUSG00000039396  | 0.460379609  | -1.11910416  | 0.01057399 | 0.02520701 | 56.3778429 | 81.2009956 | 65.6621278  | 21.74643746 | 48.6493502  | 22.46044969 | Neil3         |
| ENSMUSG00000024430  | 2.480326634  | 1.264996543  | 0.01059515 | 0.02525034 | 13.3181823 | 9.78325249 | 12.2525292  | 28.99524995 | 43.52836597 | 31.64881548 | Cabryr        |
| ENSMUSG00000051149  | 2.509965008  | 1.327667252  | 0.01063697 | 0.02534287 | 45.6392062 | 21.5231555 | 11.1501727  | 55.91941062 | 66.57279501 | 76.56971486 | Adnp          |
| ENSMUSG00000027347  | 0.479261118  | -1.061116193 | 0.0106917  | 0.02545536 | 83.2244348 | 154.575389 | 92.9181054  | 45.5639642  | 77.66826085 | 34.71160407 | Rasgrp1       |
| ENSMUSG00000005800  | 0.295865112  | -1.756988508 | 0.01070755 | 0.02548952 | 31.3210238 | 198.600025 | 48.8839664  | 24.85307138 | 24.75142379 | 30.62788595 | Mmp8          |
| ENSMUSG00000108678  | 0.425146492  | -1.233968062 | 0.01090856 | 0.02591702 | 31.3210238 | 35.219709  | 61.9454036  | 15.53316962 | 15.3629527  | 23.48137923 | Gm44758       |
| ENSMUSG00000092695  | 0.326604168  | -1.614384893 | 0.01096309 | 0.02603561 | 17.8977279 | 41.0896604 | 75.5733924  | 11.3909105  | 11.94896321 | 20.41859063 | Mmr3092       |
| ENSMUSG00000102649  | 0.418541473  | -1.256557509 | 0.01101146 | 0.02613508 | 37.5852286 | 63.5911412 | 113.979543  | 22.7819821  | 29.01891065 | 37.77439267 | Gm38021       |
| ENSMUSG00000026023  | 0.405713125  | -1.315762496 | 0.01101554 | 0.02613566 | 29.531251  | 45.9812867 | 91.6791974  | 24.85307138 | 20.48393693 | 21.43952016 | Cdk15         |
| ENSMUSG00000073207  | 0.45814199   | -1.124874245 | 0.01101602 | 0.02613566 | 38.480115  | 39.1330099 | 27.2559776  | 16.56871426 | 14.50945532 | 17.35580204 | Ccdc160       |
| ENSMUSG00000086677  | 3.431749277  | 1.778944154  | 0.01107093 | 0.02624642 | 8.05397756 | 1.9566505  | 7.43344844  | 20.71089282 | 20.48393693 | 18.37673157 | Tvp23bos      |
| ENSMUSG00000015083  | 2.7737235739 | 1.452719689  | 0.01116078 | 0.02643096 | 42.954547  | 21.5231555 | 30.9727018  | 67.31040167 | 37.55388437 | 157.2231479 | C8g           |
| ENSMUSG00000054422  | 189.2089877  | 7.56383681   | 0.01125821 | 0.02664679 | 0.8948864  | 0          | 0           | 50.74168741 | 0           | 158.2440774 | Fabp1         |
| ENSMUSG00000044788  | 0.405608746  | -1.301839334 | 0.01129589 | 0.02673225 | 116.335231 | 84.1359714 | 90.4402893  | 50.74168741 | 12.80246058 | 55.1301947  | Fads6         |
| ENSMUSG00000103034  | 3.04814497   | 1.607931519  | 0.01131737 | 0.02677184 | 21.4777235 | 15.653204  | 3.71672422  | 49.70614277 | 50.35634495 | 26.5441729  | Gm8797        |
| ENSMUSG00000072949  | 0.417400602  | -1.260495415 | 0.01138494 | 0.026903   | 46.5340926 | 38.1546847 | 39.6450583  | 14.49762497 | 10.24196846 | 27.56509735 | Acot1         |
| ENSMUSG00000110647  | 0.318473707  | -1.650753823 | 0.01141783 | 0.02696428 | 23.2670463 | 28.3714322 | 16.1058049  | 6.213267846 | 11.09546584 | 4.083718126 | Gm17745       |
| ENSMUSG00000003872  | 2.909018549  | 1.540532496  | 0.01142518 | 0.02697789 | 5.36931837 | 8.80492724 | 13.6279888  | 17.6042589  | 29.01891065 | 32.66974501 | Lin7b         |
| ENSMUSG00000033316  | 0.233558595  | -2.099379493 | 0.01144152 | 0.02700895 | 20.5823871 | 22.5014807 | 6.19454036  | 4.142178564 | 3.413989488 | 4.083718126 | Galnt9        |
| ENSMUSG00000073650  | 0.465313529  | -1.172624731 | 0.0114638  | 0.02704644 | 76.0653436 | 45.029614  | 68.139964   | 37.27960708 | 14.50945532 | 32.66974501 | Calp1         |
| ENSMUSG00000046352  | 5.69317689   | 2.509233926  | 0.01146769 | 0.02705187 | 8.94886395 | 20.5448302 | 18.5836211  | 89.05683913 | 2.560492116 | 181.7254566 | Gjb2          |
| ENSMUSG00000078817  | 3.298383958  | 1.72175935   | 0.01152006 | 0.02714516 | 5.36931837 | 5.86995149 | 7.43344844  | 28.99524995 | 11.94896321 | 20.41859063 | Nlrp12        |
| ENSMUSG00000085204  | 0.267463996  | -1.902583398 | 0.01151852 | 0.02714516 | 8.05397756 | 27.393107  | 33.450518   | 5.177723205 | 5.974481604 | 7.146506721 | Gm15327       |
| ENSMUSG00000103558  | 0.300120858  | -1.73638     |            |            |            |            |             |             |             |             |               |

|                     |              |              |            |            |            |            |            |             |             |             |               |
|---------------------|--------------|--------------|------------|------------|------------|------------|------------|-------------|-------------|-------------|---------------|
| ENSMUSG00000087135  | 2.962278915  | 1.566707485  | 0.01252861 | 0.0291485  | 10.7386367 | 6.84827674 | 3.71672422 | 22.7819821  | 21.3374343  | 20.41859063 | Gm16096       |
| ENSMUSG00000038618  | 2.007957003  | 1.005728377  | 0.01270363 | 0.02949089 | 19.6875007 | 41.0896604 | 37.1672422 | 51.77723205 | 75.10776873 | 68.40227861 | Rassf7        |
| ENSMUSG000000103867 | 0.438278951  | -1.190078702 | 0.01273114 | 0.02954258 | 51.0085245 | 100.767501 | 184.597303 | 51.77723205 | 40.11437648 | 55.1301947  | 9630010A21Rik |
| ENSMUSG000000090582 | 0.127362216  | 0.1075438308 | 0.01283886 | 0.02978032 | 17.0028415 | 22.5014807 | 13.6279888 | 34.17297315 | 36.70038699 | 41.85811079 | Gm17024       |
| ENSMUSG000000081264 | 0.198661592  | -2.331615116 | 0.01288347 | 0.02986742 | 7.15909116 | 11.739903  | 45.8395987 | 4.142178564 | 2.560492116 | 6.125577189 | Gm14021       |
| ENSMUSG00000009378  | 0.392661245  | -1.34864288  | 0.01290869 | 0.02991362 | 10.0217049 | 72.3960864 | 86.7235651 | 27.95970531 | 12.80246058 | 62.27670142 | Slc16a12      |
| ENSMUSG000000095762 | 2.770886255  | 1.47034749   | 0.01291911 | 0.02993366 | 4.47443198 | 11.739903  | 12.3890807 | 30.03079459 | 25.60492116 | 22.46044969 | Gm16378       |
| ENSMUSG000000102212 | 4.251108952  | 2.087839235  | 0.01296367 | 0.03003279 | 1.78977279 | 3.91330099 | 7.43344844 | 9.319901769 | 27.3119159  | 17.35580204 | C230085N15Rik |
| ENSMUSG000000092659 | 3.400848894  | 1.765894906  | 0.01301869 | 0.03013964 | 10.7386367 | 4.89162624 | 2.47781624 | 17.06994744 | 25.88861603 | 20.41859063 | Mir3100       |
| ENSMUSG000000065847 | 0.305802123  | -1.709329672 | 0.01309271 | 0.03029452 | 13.4232959 | 30.3280827 | 59.4675875 | 11.39099105 | 6.827978976 | 13.27208391 | Gm25188       |
| ENSMUSG000000061576 | 0.121759078  | -3.037898752 | 0.01319247 | 0.03048362 | 18.7926143 | 17.6098545 | 29.7337937 | 0           | 0           | 8.167436252 | Dpp6          |
| ENSMUSG000000101356 | 0.288217178  | -1.794771772 | 0.01321177 | 0.03052406 | 17.8977279 | 19.566505  | 21.0614372 | 8.284357128 | 1.706994744 | 7.146506721 | Gm28876       |
| ENSMUSG000000044938 | 0.146013968  | -2.775821705 | 0.01325484 | 0.03060686 | 105.596595 | 1586.84355 | 278.754316 | 55.91941062 | 166.4319875 | 65.33949002 | Khl31         |
| ENSMUSG00000026546  | 0.423991867  | -1.237891505 | 0.01326446 | 0.03062489 | 47.428979  | 22.5014807 | 39.6450583 | 18.63980354 | 13.65595795 | 14.29301344 | Cfap45        |
| ENSMUSG000000059003 | 0.247584956  | -2.014004441 | 0.01332127 | 0.03074348 | 28.6363647 | 12.7182282 | 8.67235651 | 4.142178564 | 4.26748686  | 4.083718126 | Gnn2a         |
| ENSMUSG000000081723 | 0.271167885  | -1.882741765 | 0.01348898 | 0.03110509 | 20.5823871 | 47.9379372 | 11.1501727 | 4.142178564 | 10.24196846 | 7.146506721 | Gm15931       |
| ENSMUSG000000090193 | 0.225576683  | -2.148310274 | 0.01360428 | 0.03134568 | 7.15909116 | 11.6965535 | 34.689426  | 4.142178564 | 5.120984232 | 3.062788595 | Gm15995       |
| ENSMUSG000000031027 | 0.329136972  | -1.718936714 | 0.01366976 | 0.03147056 | 7.15909116 | 6.84827674 | 3.71672422 | 24.85307138 | 23.04442904 | 11.23022485 | Stk33         |
| ENSMUSG000000074575 | 0.28065349   | -1.833138097 | 0.01368464 | 0.03148765 | 29.531251  | 15.653204  | 13.6279888 | 4.142178564 | 3.413989488 | 9.188365784 | Kcng1         |
| ENSMUSG000000085088 | 0.369615469  | -1.435902958 | 0.01372924 | 0.03158174 | 27.7414783 | 80.2267604 | 152.385693 | 26.92416067 | 34.13989488 | 34.71160407 | 4931413K12Rik |
| ENSMUSG000000063018 | 0.36120121   | -1.469125369 | 0.01374804 | 0.03162068 | 19.6875007 | 22.5014807 | 23.5392534 | 7.248812487 | 11.09546584 | 5.104647658 | 2010204K13Rik |
| ENSMUSG000000090665 | 2.398854225  | 1.26234549   | 0.01388105 | 0.03191361 | 8.05397756 | 21.5231555 | 28.4948857 | 45.5639642  | 47.79585283 | 43.8996986  | Gad1-ps       |
| ENSMUSG000000070354 | 0.375683499  | -1.412410345 | 0.01392677 | 0.03199911 | 23.2670463 | 55.7645392 | 43.3617825 | 11.39099105 | 23.89792642 | 10.20929523 | Evl2          |
| ENSMUSG000000081968 | 0.203846045  | -2.301542918 | 0.01392769 | 0.03199911 | 4.47443198 | 33.2630585 | 38.4061053 | 2.071089282 | 5.120984232 | 8.167436252 | Dpp23a-ps2    |
| ENSMUSG000000015981 | 0.432018604  | -1.210834655 | 0.01408032 | 0.03232347 | 27.7414783 | 44.0246362 | 32.2116099 | 19.67534818 | 10.24196846 | 15.31394297 | Stk32c        |
| ENSMUSG000000106636 | 0.451367084  | -1.14762688  | 0.01413911 | 0.03244962 | 66.2215933 | 165.336967 | 257.692879 | 59.02604454 | 73.40077399 | 87.79939371 | Gm3813        |
| ENSMUSG000000015880 | 0.462291826  | -1.113124242 | 0.0144031  | 0.03300182 | 50.1136381 | 91.9625734 | 54.5119532 | 39.35069636 | 34.13989488 | 17.35580204 | Ncapg         |
| ENSMUSG000000066072 | 129.1038012  | 7.012387669  | 0.0140642  | 0.03300496 | 0.8948864  | 0          | 0          | 49.70614277 | 0           | 92.90458737 | Cyp4a10       |
| ENSMUSG000000036306 | 0.366567373  | -1.447849711 | 0.01441925 | 0.03302573 | 17.8977279 | 36.1980342 | 26.0170695 | 7.248812487 | 13.65595795 | 8.167436252 | Lzts1         |
| ENSMUSG000000084885 | 2.298755069  | 1.200852756  | 0.01445612 | 0.0330845  | 10.7386367 | 15.653204  | 16.1058049 | 23.81752674 | 39.26087911 | 33.69067454 | 3010001F23Rik |
| ENSMUSG000000029133 | 0.456040936  | -1.132738115 | 0.01458407 | 0.03333079 | 58.1676157 | 206.426627 | 128.84644  | 63.1682331  | 46.94235546 | 69.42320814 | Ociad2        |
| ENSMUSG000000109337 | 2.824711284  | 1.498103416  | 0.01462519 | 0.03341265 | 19.6875007 | 7.82660199 | 4.95563229 | 34.17297315 | 29.87248002 | 29.60695461 | Gm45047       |
| ENSMUSG000000112554 | 0.351813336  | -1.507117922 | 0.0146258  | 0.03341265 | 17.8977279 | 39.1330099 | 74.3344844 | 11.39099105 | 17.06994744 | 17.35580204 | Gm48717       |
| ENSMUSG000000036131 | 0.262364767  | -1.930354102 | 0.01481121 | 0.03379573 | 32.2159102 | 16.6315292 | 9.91126458 | 8.284357128 | 4.26748686  | 3.062788595 | Frmf2         |
| ENSMUSG000000019992 | 0.417031593  | -1.261771413 | 0.01485561 | 0.03389191 | 26.8465919 | 26.4147817 | 27.2559776 | 7.248812487 | 11.94896321 | 14.29301344 | Ambp          |
| ENSMUSG000000108321 | 0.40346775   | -1.309474735 | 0.01489552 | 0.03396926 | 22.3721599 | 49.8945877 | 64.4232198 | 22.7819821  | 18.77694218 | 13.27208391 | Gm44649       |
| ENSMUSG000000015890 | 13.39610459  | 3.74374164   | 0.01492932 | 0.03403716 | 1.78977279 | 4.89162624 | 0          | 25.88861603 | 0           | 65.33949002 | Amdhd1        |
| ENSMUSG000000037747 | 2.443916635  | 1.289195074  | 0.01496857 | 0.03411745 | 14.3181823 | 6.84827674 | 19.8225292 | 36.24406244 | 34.13989488 | 28.58602688 | Phyhlp        |
| ENSMUSG000000056290 | 2.098999746  | 1.069701992  | 0.01508239 | 0.03434374 | 56.3778429 | 204.469977 | 79.2901166 | 241.2819014 | 247.5142379 | 225.6254265 | Msc44ab       |
| ENSMUSG000000033981 | 0.326444315  | -1.615082337 | 0.01527146 | 0.03470974 | 13.4232959 | 23.479806  | 16.1267846 | 6.213267846 | 5.97448269  | 5.104647658 | Gria2         |
| ENSMUSG000000100642 | 0.174944359  | -2.51503195  | 0.01529224 | 0.03475229 | 46.5340926 | 17.6098545 | 2.47781615 | 4.142178564 | 2.560492116 | 5.104647658 | Gm28230       |
| ENSMUSG000000036334 | 711.5909366  | 9.474920869  | 0.01531403 | 0.03479715 | 0          | 0          | 0          | 90.09238377 | 0           | 313.4253662 | Nat8f2        |
| ENSMUSG000000065530 | 0.382305531  | -1.387202021 | 0.01532725 | 0.03482251 | 26.8465919 | 61.6344907 | 118.935175 | 25.88861603 | 20.48393693 | 32.66974501 | Mir99a        |
| ENSMUSG000000058101 | 0.336968728  | -1.569313387 | 0.01545744 | 0.03509946 | 14.3181823 | 21.5231555 | 42.1228745 | 10.35544641 | 8.53497372  | 7.146506721 | 1700084J12Rik |
| ENSMUSG000000028356 | 267.0242223  | 0.060828856  | 0.0154885  | 0.03515585 | 0          | 0.93497575 | 0          | 211.2511068 | 0           | 577.8461148 | Ampb          |
| ENSMUSG000000057132 | 0.462442814  | -1.112653123 | 0.0155295  | 0.0352253  | 26.8465919 | 29.3497575 | 35.9283341 | 15.53316962 | 13.65595795 | 13.27208391 | Rgrip1        |
| ENSMUSG000000040258 | 0.259084043  | -1.948507932 | 0.01555954 | 0.03528398 | 12.5284095 | 24.4581312 | 12.3890807 | 6.213267846 | 1.706994744 | 5.104647658 | Nxph4         |
| ENSMUSG000000052301 | 2.750768934  | 1.459834958  | 0.01557641 | 0.03531279 | 9.84375035 | 8.80492724 | 4.95563229 | 16.56871426 | 24.75142379 | 24.50230876 | Doc2a         |
| ENSMUSG000000022887 | 0.256352248  | -1.963800546 | 0.0156414  | 0.03544858 | 170.923302 | 73.3743936 | 26.0170695 | 18.63980354 | 5.120984232 | 45.94182892 | Masp1         |
| ENSMUSG000000083306 | 0.350665083  | -1.51183431  | 0.01567949 | 0.03550369 | 14.4772735 | 38.1546847 | 84.2457489 | 10.24196846 | 18.37673157 | Gm13868     |               |
| ENSMUSG000000047394 | 0.34518698   | -1.534550048 | 0.01572034 | 0.03558667 | 35.7954558 | 24.4581312 | 30.9727018 | 7.248812487 | 5.120984232 | 19.3976611  | Odft3b        |
| ENSMUSG000000024354 | 2.534626915  | 1.341773405  | 0.01572322 | 0.03558862 | 10.7386367 | 8.80492724 | 12.3890807 | 20.71089282 | 22.19093167 | 37.77439267 | Slc23a1       |
| ENSMUSG000000030325 | 0.230192661  | -1.642987854 | 0.01572613 | 0.03559246 | 17.0028415 | 41.0896604 | 23.592534  | 15.17723205 | 14.50945532 | 6.125577189 | Klrk1c        |
| ENSMUSG000000097327 | 0.372986493  | -1.422804709 | 0.01589555 | 0.03585389 | 38.480115  | 28.3714322 | 16.1058049 | 13.46208033 | 7.681476348 | 10.20929523 | E030030i06Rik |
| ENSMUSG000000085982 | 2.884645627  | 1.528394097  | 0.01586776 | 0.03586766 | 8.05397756 | 5.86995149 | 6.19454036 | 17.6042589  | 15.3629527  | 25.52323829 | 9530051G07Rik |
| ENSMUSG000000106717 | 0.37107872   | -1.430202826 | 0.01590437 | 0.03594082 | 18.7926143 | 79.2443451 | 63.1843117 | 15.53316962 | 19.63043956 | 24.50230876 | Gm42798       |
| ENSMUSG000000029361 | 0.289457766  | -1.78857523  | 0.0159093  | 0.03594237 | 17.0028415 | 84.1359714 | 24.7781615 | 17.6042589  | 6.827978976 | 12.25115438 | Nos1          |
| ENSMUSG000000025658 | 0.24337865   | -2.038725477 | 0.01598436 | 0.03607887 | 15.2130687 | 29.3497575 | 7.43344844 | 6.213267846 | 2.560492116 | 4.083718126 | Ksr2          |
| ENSMUSG000000011740 | 0.442998945  | -1.174654488 | 0.01606782 | 0.03625515 | 25.9517055 | 24.4581312 | 34.689426  | 13.46208033 | 12.80246058 | 11.23022485 | Ac122335.1    |
| ENSMUSG000000046610 | 0.368455368  | -1.440438221 | 0.01609487 | 0.03630834 | 18.7926143 | 17.6098545 | 29.7337937 | 7.248812487 | 6.827978976 | 10.20929523 | Oacyl         |
| ENSMUSG000000022519 | 0.180541527  | -2.469597383 | 0.01612559 | 0.03636309 | 374.9574   | 4355.50401 | 624.409669 | 16.58289457 | 248.3677352 | 302.1951413 | Srl           |
| ENSMUSG000000051228 | 2.7671717347 | 1.468383827  | 0.01617931 | 0.03645512 | 18.7926143 | 8.80492724 | 4.95563229 | 23.81752674 | 33.28639751 | 34.71160407 | Nyx           |
| ENSMUSG000000074219 | 1.286638427  | 1.128714682  | 0.0161779  | 0.03645512 | 18.7926143 | 16.6315292 | 9.91126458 | 31.06633923 | 37.55388437 | 31.64881548 | Gm10644       |
| ENSMUSG000000084772 | 4.284437899  | 2.099105941  | 0.01624649 | 0.03658576 | 1.78977279 | 8.80492724 | 1.23890807 | 19.67534818 | 14.50945532 | 17.35580204 | Gm15473       |
| ENSMUSG000000081189 | 2.752067992  | 1.460516113  | 0.01630964 | 0.03669506 | 5.36691837 | 11.739903  | 16.1058049 | 26.92416067 | 21.3374343  | 41.85811079 | Hspd1-ps4     |
| ENSMUSG000000082765 | 3.099504029  | 1.632037379  | 0.01631709 | 0.03670695 | 9.84886393 | 4.89162624 | 3.71672422 | 14.49762497 | 20.48393693 | 20.41859063 | Gm14411       |
| ENSMUSG0000000      |              |              |            |            |            |            |            |             |             |             |               |

|                     |             |              |            |            |            |            |            |             |             |             |               |
|---------------------|-------------|--------------|------------|------------|------------|------------|------------|-------------|-------------|-------------|---------------|
| ENSMUSG00000038641  | 112.1743719 | 6.809599296  | 0.0188295  | 0.04168335 | 0.8948864  | 0          | 0          | 26.92416067 | 0           | 96.98830549 | Akr1d1        |
| ENSMUSG00000080198  | 0.244502044 | -2.032081568 | 0.01886816 | 0.04175255 | 6.26420477 | 21.5231555 | 30.9727018 | 2.071089282 | 5.974481604 | 6.125577189 | Gm13573       |
| ENSMUSG00000106237  | 2.797286685 | 1.484028119  | 0.01889898 | 0.04180945 | 37.5852286 | 15.653204  | 4.95563229 | 51.77723205 | 51.20984232 | 62.27670142 | Gm8066        |
| ENSMUSG00000026424  | 0.468320942 | -1.094430543 | 0.01922977 | 0.0424363  | 71.5909116 | 50.8729129 | 38.4061503 | 35.20851779 | 15.3629527  | 25.52323829 | Gpr371        |
| ENSMUSG00000084978  | 0.285649894 | -1.807680099 | 0.01934904 | 0.04267171 | 10.7386367 | 36.1980342 | 89.2013812 | 12.42653569 | 17.92344481 | 8.167436252 | Gm11655       |
| ENSMUSG00000060275  | 0.411394801 | -1.281404532 | 0.01955496 | 0.04308656 | 23.2670463 | 34.2413837 | 22.3003453 | 8.284357128 | 9.388471092 | 15.31394297 | Nrg2          |
| ENSMUSG00000032013  | 0.274031866 | -1.867584427 | 0.01958832 | 0.04314883 | 9.84375035 | 23.479806  | 16.1058049 | 7.248812487 | 4.26748686  | 2.041859063 | Trim29        |
| ENSMUSG00000035237  | 2.05349412  | 1.038080817  | 0.01968981 | 0.04334984 | 73.3806844 | 66.5261169 | 66.9010359 | 124.2653569 | 67.42629239 | 233.7928627 | Lcat          |
| ENSMUSG00000064125  | 0.354522493 | -1.496050933 | 0.01969792 | 0.04336205 | 22.3721599 | 12.7182282 | 35.9283341 | 7.248812487 | 8.53497372  | 9.188365784 | Prr36         |
| ENSMUSG00000021913  | 0.323876517 | -1.626484226 | 0.01973598 | 0.04343455 | 26.8465919 | 10.7615777 | 22.3003453 | 5.177723205 | 5.120984232 | 9.188365784 | Ogdhl         |
| ENSMUSG00000085071  | 0.240117501 | -2.058187535 | 0.01974963 | 0.04345894 | 42.954547  | 21.5231555 | 7.43344844 | 2.071089282 | 5.120984232 | 10.20929532 | Gm14066       |
| ENSMUSG00000043664  | 0.422959243 | -1.241409447 | 0.02010408 | 0.04413566 | 26.8465919 | 42.0679857 | 33.450518  | 15.53316962 | 7.681476348 | 20.41859063 | Tmem221       |
| ENSMUSG00000071862  | 0.389655586 | -1.359728596 | 0.02032663 | 0.04456648 | 25.9517055 | 16.6315292 | 30.9727018 | 6.213267846 | 11.94896321 | 10.20929532 | Lrrtm2        |
| ENSMUSG000000104973 | 0.43073588  | -1.215124592 | 0.02033539 | 0.04457991 | 29.531251  | 51.8512382 | 92.9181054 | 17.6042589  | 27.3119159  | 29.60695641 | A530041M06Rik |
| ENSMUSG00000052981  | 0.350285737 | -1.513395848 | 0.02039035 | 0.04467727 | 14.3181823 | 25.4364565 | 43.3617825 | 6.213267846 | 9.388471092 | 13.27208391 | Ube2ql1       |
| ENSMUSG00000047591  | 0.181997424 | -2.458010065 | 0.02045117 | 0.04477421 | 4.74443198 | 118.377355 | 14.8668969 | 4.142178564 | 7.681476348 | 13.27208391 | Mafa          |
| ENSMUSG00000035694  | 3.257526589 | 1.703776954  | 0.02051394 | 0.04487839 | 6.26420477 | 1.9566505  | 9.91126458 | 15.53316962 | 17.92344481 | 24.50230876 | Caps2         |
| ENSMUSG00000019848  | 0.219845303 | -2.185439383 | 0.0205345  | 0.04491177 | 5.36931837 | 125.225632 | 30.9727018 | 8.284357128 | 17.92344481 | 9.188365784 | Popdc3        |
| ENSMUSG00000026639  | 0.38426668  | -1.379820211 | 0.02059283 | 0.0450277  | 14.3181823 | 27.393107  | 26.0170695 | 9.319901769 | 9.388471092 | 7.146506721 | Lamb3         |
| ENSMUSG00000104432  | 0.302212098 | -1.726366679 | 0.02061794 | 0.04505934 | 13.4232959 | 49.8945877 | 78.0512086 | 8.284357128 | 24.75142379 | 9.188365784 | A430027C01Rik |
| ENSMUSG00000086522  | 2.339532532 | 1.22622029   | 0.0208656  | 0.04555944 | 9.84375035 | 13.6965535 | 8.67235651 | 27.95970531 | 27.3119159  | 20.41859063 | Gm4473        |
| ENSMUSG00000097537  | 2.092777917 | 1.065419223  | 0.02088213 | 0.04558964 | 23.2670463 | 19.566505  | 11.1501727 | 37.27960708 | 32.43290013 | 44.92089939 | 2610020C07Rik |
| ENSMUSG00000075307  | 0.213405381 | -2.228331543 | 0.02094936 | 0.04573053 | 173.607961 | 2303.95596 | 500.518861 | 229.8909103 | 216.7883325 | 188.8719633 | Khl41         |
| ENSMUSG00000064294  | 8.190350868 | 3.033925171  | 0.02102107 | 0.0450277  | 44.7443198 | 16.6315292 | 17.344713  | 210.2155621 | 6.827978976 | 428.7904032 | Aox3          |
| ENSMUSG00000095178  | 0.312958502 | -1.675956724 | 0.02120094 | 0.04623204 | 13.4232959 | 26.4147817 | 60.7064956 | 5.177723205 | 13.65595795 | 12.25115438 | Gm22716       |
| ENSMUSG00000102593  | 0.47390319  | -1.077335723 | 0.0214745  | 0.04674076 | 38.480115  | 42.0679857 | 90.4402893 | 27.95970531 | 23.04442904 | 29.60695641 | Gm38384       |
| ENSMUSG00000055730  | 89.0607717  | 6.476718208  | 0.02152405 | 0.04681604 | 0.8948864  | 0          | 0          | 26.92416067 | 0           | 71.46506721 | Ces2a         |
| ENSMUSG00000097785  | 2.026001346 | 1.018635133  | 0.02155018 | 0.04685929 | 23.2670463 | 20.5448302 | 19.8225292 | 43.49287492 | 29.01891065 | 57.17205377 | B230217O12Rik |
| ENSMUSG00000110353  | 2.937328586 | 1.554504663  | 0.02177064 | 0.04725529 | 5.36931837 | 5.86995149 | 6.19454036 | 13.46208033 | 23.04442904 | 14.29301344 | Gm33543       |
| ENSMUSG00000086165  | 2.295868725 | 1.199040153  | 0.02197699 | 0.04766654 | 11.6335231 | 8.80492724 | 17.344713  | 31.06633923 | 22.19093167 | 32.66974501 | Gm15690       |
| ENSMUSG00000109051  | 3.790330273 | 1.922323564  | 0.02203619 | 0.04777659 | 0.8948864  | 4.89162624 | 7.43344844 | 16.56871426 | 19.63043956 | 12.25115438 | Gm44913       |
| ENSMUSG00000039438  | 9.682372758 | 3.275360637  | 0.02206593 | 0.0478227  | 2.68465919 | 0.97832525 | 2.47781615 | 16.56871426 | 0           | 42.87904032 | Ttc36         |
| ENSMUSG00000026368  | 98.22828857 | 6.618066658  | 0.02215402 | 0.04798904 | 0          | 0.97832525 | 0          | 20.71089282 | 0           | 87.79993971 | F13b          |
| ENSMUSG00000027713  | 2.191538868 | 1.131944266  | 0.02218052 | 0.04803415 | 19.6875007 | 15.653204  | 8.67235651 | 33.13742851 | 28.16541327 | 36.75346313 | 1810062G17Rik |
| ENSMUSG00000050919  | 0.308765287 | -1.695417528 | 0.02222909 | 0.04812704 | 95.7528443 | 40.1113352 | 12.3890807 | 22.7819821  | 11.09546584 | 12.25115438 | Zfp366        |
| ENSMUSG00000078922  | 0.380957153 | -1.392299351 | 0.02229226 | 0.04824838 | 93.9630715 | 353.175415 | 56.9897713 | 73.52366951 | 71.69377925 | 46.96275845 | Tgtp1         |
| ENSMUSG00000070704  | 485.8471882 | 8.924358809  | 0.02238389 | 0.04842502 | 0          | 0          | 0          | 62.13267846 | 0           | 213.3742721 | Ugt2b36       |
| ENSMUSG00000039154  | 2.267984727 | 1.181410925  | 0.0223906  | 0.04843336 | 12.5284095 | 9.78325249 | 27.2559776 | 35.20851779 | 38.40738174 | 36.75346313 | Shd           |
| ENSMUSG00000059108  | 0.453674812 | -1.140269531 | 0.02245757 | 0.04857203 | 42.954547  | 120.334006 | 61.9454036 | 40.386241   | 21.3374343  | 40.83718126 | Ifitm6        |
| ENSMUSG00000043439  | 0.350709075 | -1.511653333 | 0.02246913 | 0.04858549 | 14.3181823 | 35.219709  | 33.450518  | 5.177723205 | 8.53497372  | 15.31394297 | Epop          |
| ENSMUSG00000108984  | 0.319229175 | -1.647335587 | 0.02252465 | 0.04867359 | 16.1079551 | 44.0246362 | 80.5290247 | 6.213267846 | 23.89792642 | 14.29301344 | Gm44916       |
| ENSMUSG00000106709  | 0.275307456 | -1.860884413 | 0.02259918 | 0.04880972 | 44.7443198 | 15.653204  | 8.67235651 | 4.142178564 | 6.827978976 | 8.167436252 | Gm30270       |
| ENSMUSG00000096674  | 0.210985123 | -2.24478682  | 0.02260531 | 0.04881674 | 17.0028415 | 15.653204  | 19.8225292 | 3.106633923 | 0           | 8.167436252 | Mup15         |
| ENSMUSG00000061959  | 85.33649324 | 6.415090921  | 0.02263475 | 0.04887409 | 0.8948864  | 0          | 0          | 24.85307138 | 0           | 69.42320814 | Ces1e         |
| ENSMUSG00000090592  | 0.360053575 | -1.473716504 | 0.02278717 | 0.04917813 | 17.0028415 | 69.4610927 | 115.218451 | 20.71089282 | 29.01891065 | 22.4604969  | Gm17571       |
| ENSMUSG00000071192  | 2.356966737 | 1.236931398  | 0.02283998 | 0.04927326 | 17.0028415 | 9.78325249 | 34.689426  | 38.31515172 | 61.45181078 | 42.87904032 | Wfikn1        |
| ENSMUSG00000062151  | 2.995584774 | 1.582837662  | 0.02298852 | 0.04954951 | 10.7386367 | 8.80492724 | 2.47781615 | 15.53316962 | 21.3374343  | 30.62788595 | Unc13c        |
| ENSMUSG00000074336  | 37.33617026 | 5.222502046  | 0.02305214 | 0.0496592  | 2.68465919 | 1.9566505  | 0          | 40.386241   | 0           | 135.7836277 | Apoc4         |
| ENSMUSG00000071537  | 2.308945159 | 1.207233907  | 0.02321763 | 0.04996703 | 31.3210238 | 11.739903  | 16.1058049 | 32.10188387 | 62.30530815 | 42.87904032 | Klrg2         |
